# Supplementary material for: Single nuclei/cell transcriptomics reveal DMD driven cell dynamics and mechanisms of fibroblast inflammatory tissue priming in human dystrophic muscle
Source: Research Square preprint supplement (doi:10.21203/rs.3.rs-4934147/v1), 2026-04-08
Supplement: Supplementary file 1 [file 65fb24dac617bf05a358e753.xlsx]

## Sheet: Table of Contents
Table of Contents
Sheet	Title	Description
a	Major celltypes	Seurat FindMarkers output Identifying genes Upregulatedin either DMD or healthy (column F) in each of major cell type (column H)
b	Subtypes	Seurat FindMarkers output Identifying genes Up-regulated in either DMD or healthy (column F) in each of subtype of major cell population (column H)
c	sc2ABCvSC1	Seurat FindMarkers output Identifying genes Differentially expressed between SC_2A+2B+2C vs SC_1
d	sc2ABCvSC1Enrichr	Enrichr GSEA using genes significantly (adj. p < 0.05, FC > 2) upregulated in SC_2A+2B+2C relative to SC_1
e	sc2AvSC1	Seurat FindMarkers output Identifying genes Differentially expressed between SC_2A vs SC_1
f	sc2AvSC1Enrichr	Enrichr GSEA using genes significantly (adj. p < 0.05, FC > 2) upregulated in SC_2A relative to SC_1
g	sc2BvSC1	Seurat FindMarkers output Identifying genes Differentially expressed between SC_2B vs SC_1
h	sc2BvSC1Enrichr	Enrichr GSEA using genes significantly (adj. p < 0.05, FC > 2) upregulated in SC_2B relative to SC_1
i	sc2CvSC1	Seurat FindMarkers output Identifying genes Differentially expressed between SC_2C vs SC_1
j	sc2CvSC1Enrichr	Enrichr GSEA using genes significantly (adj. p < 0.05, FC > 2) upregulated in SC_2C relative to SC_1
k	sc3v1	Seurat FindMarkers output Identifying genes Differentially expressed between SC_3 vs SC_1
l	sc3v1Enrichr	Enrichr GSEA using genes significantly (adj. p < 0.05, FC > 2) upregulated in SC_3 relative to SC_1
m	sc4v1	Seurat FindMarkers output Identifying genes Differentially expressed between SC_4 vs SC_1
n	sc4v1Enrichr	Enrichr GSEA using genes significantly (adj. p < 0.05, FC > 2) upregulated in SC_4 relative to SC_1
o	Type I DMD vs Healthy enr	Enrichr GSEA using top 600 genes significantly (adj. p < 0.05) upregulated in Duchenne Type I fibers relative to Healthy Type 1 fibers
p	Type I DMD vs Healthy enr	Enrichr GSEA using top 600 genes significantly (adj. p < 0.05) upregulated in Duchenne Type II fibers relative to Healthy Type II fibers
q	MEG3hi vs H-Type I	Seurat FindMarkers output Identifying genes Differentially expressed between Type I Meg3hi vs H-Type I
r	MEG3hi vs H-Type I enrichr	Enrichr GSEA using genes significantly (adj. p < 0.05, FC > 2) upregulated in MEG3hi relative to Healthy Type I
s	FB_0 vs FB_5	Seurat FindMarkers output Identifying genes Differentially expressed between FB_0 vs FB_5
t	FB_0 vs FB_5 enrichr	Enrichr GSEA using genes significantly (adj. p < 0.05) upregulated in FB_0 relative to FB_5
u	FB_1 vs FB_5	Seurat FindMarkers output Identifying genes Differentially expressed between FB_1 vs FB_5
v	FB_1 vs FB_5 enrichr	Enrichr GSEA using genes significantly (adj. p < 0.05) upregulated in FB_1 relative to FB_5
w	FB_2 vs FB_5	Seurat FindMarkers output Identifying genes Differentially expressed between FB_2 vs FB_5
x	FB_2 vs FB_5 enrichr	Enrichr GSEA using genes significantly (adj. p < 0.05) upregulated in FB_2 relative to FB_5
y	FB_3 vs FB_5	Seurat FindMarkers output Identifying genes Differentially expressed between FB_3 vs FB_5
z	FB_3 vs FB_5 enrichr	Enrichr GSEA using genes significantly (adj. p < 0.05) upregulated in FB_3 relative to FB_5
aa	FB_6 vs FB_5	Seurat FindMarkers output Identifying genes Differentially expressed between FB_6 vs FB_5
ab	FB_6 vs FB_5 enrichr	Enrichr GSEA using genes significantly (adj. p < 0.05) upregulated in FB_6 relative to FB_5
ac	TNF vs Unstim	Bulk RNAseq DE genes from cultured fibroblasts stimulated with TNF vs Unstim
ad	TNF+Rapa vs TNF	Bulk RNAseq DE genes from cultured fibroblasts stimulated with TNF vs TNF + Rapa
ae	TNF+iBet vs TNF	Bulk RNAseq DE genes from cultured fibroblasts stimulated with TNF vs TNF + iBet
af	Endothelial cell metascape
ag	Myeloid TAK242 vs Unstim	DE genes between myeloid cells of 8305 TAK vs myeloid cells of 8305 no TAK. FC>0 = upregulated in TAK, < 0 = downregulated with TAK
ah	Myeloid TAK242 vs Unstim enrichr	Enrichr GSEA for 8305 myeloid cells treated with Tak. Allgenes downregulated with TAK (adj.p < 0.05, log2(FC) <0) were used in this analysis
ai	Cell-cell communication

## Sheet: a. Major celltypes
Seurat FindMarkers output Identifying genes Upregulatedin either DMD or healthy (column F) in each of major cell type (column H)
p_val	avg_log2FC	pct.1	pct.2	p_val_adj	Disease status	gene	Major cell type
2.40881e-08	-1.82559	0.067	0	0.000881649	healthy	CENPU	Adipocytes
2.40881e-08	-1.73949	0.067	0	0.000881649	healthy	AC137630.1	Adipocytes
1.84765e-10	-1.6121	0.133	0.002	6.76259e-06	healthy	ZNF391	Adipocytes
2.40881e-08	-1.56317	0.067	0	0.000881649	healthy	CCN4	Adipocytes
2.40881e-08	-1.56317	0.067	0	0.000881649	healthy	PHETA2	Adipocytes
2.40881e-08	-1.55207	0.067	0	0.000881649	healthy	MORC1	Adipocytes
2.40881e-08	-1.55207	0.067	0	0.000881649	healthy	W	Adipocytes
2.40881e-08	-1.35893	0.067	0	0.000881649	healthy	TRIM63	Adipocytes
2.40881e-08	-1.3112	0.067	0	0.000881649	healthy	AC131391.1	Adipocytes
2.40881e-08	-1.29608	0.067	0	0.000881649	healthy	ZNF287	Adipocytes
2.40881e-08	-1.27769	0.067	0	0.000881649	healthy	DTX3L	Adipocytes
2.40881e-08	-1.27769	0.067	0	0.000881649	healthy	AC004593.1	Adipocytes
2.40881e-08	-1.22903	0.067	0	0.000881649	healthy	LRRCC1	Adipocytes
2.40881e-08	-1.22903	0.067	0	0.000881649	healthy	CORO1A	Adipocytes
2.40881e-08	-1.04256	0.067	0	0.000881649	healthy	AC112484.1	Adipocytes
2.40881e-08	-1.04256	0.067	0	0.000881649	healthy	SPDYE9P	Adipocytes
2.40881e-08	-1.04256	0.067	0	0.000881649	healthy	DUSP18	Adipocytes
2.40881e-08	-1.00508	0.067	0	0.000881649	healthy	CD3G	Adipocytes
2.40881e-08	-1.00508	0.067	0	0.000881649	healthy	CD4	Adipocytes
2.40881e-08	-1.00508	0.067	0	0.000881649	healthy	AC007610.1	Adipocytes
2.40881e-08	-1.00508	0.067	0	0.000881649	healthy	AP005901.5	Adipocytes
2.40881e-08	-1.00508	0.067	0	0.000881649	healthy	AC006130.1	Adipocytes
2.40881e-08	-0.987891	0.067	0	0.000881649	healthy	HIST2H3PS2	Adipocytes
2.40881e-08	-0.987891	0.067	0	0.000881649	healthy	TACR3	Adipocytes
2.40881e-08	-0.987891	0.067	0	0.000881649	healthy	AC092681.3	Adipocytes
2.40881e-08	-0.987891	0.067	0	0.000881649	healthy	CFAP43	Adipocytes
2.40881e-08	-0.987891	0.067	0	0.000881649	healthy	ARHGDIG	Adipocytes
2.40881e-08	-0.987891	0.067	0	0.000881649	healthy	AC018553.1	Adipocytes
2.40881e-08	-0.928535	0.067	0	0.000881649	healthy	AC018442.2	Adipocytes
2.40881e-08	-0.928535	0.067	0	0.000881649	healthy	ZNF404	Adipocytes
2.40881e-08	-0.812881	0.067	0	0.000881649	healthy	RAP1GAP	Adipocytes
2.40881e-08	-0.812881	0.067	0	0.000881649	healthy	LINC02397	Adipocytes
2.40881e-08	-0.79902	0.067	0	0.000881649	healthy	IGFN1	Adipocytes
2.40881e-08	-0.79902	0.067	0	0.000881649	healthy	AL513217.1	Adipocytes
2.40881e-08	-0.79902	0.067	0	0.000881649	healthy	AC092153.1	Adipocytes
2.40881e-08	-0.79902	0.067	0	0.000881649	healthy	AC019068.1	Adipocytes
2.40881e-08	-0.79902	0.067	0	0.000881649	healthy	ASB18	Adipocytes
2.40881e-08	-0.79902	0.067	0	0.000881649	healthy	ZBTB11-AS1	Adipocytes
2.40881e-08	-0.79902	0.067	0	0.000881649	healthy	KBTBD12	Adipocytes
2.40881e-08	-0.79902	0.067	0	0.000881649	healthy	FBXO45	Adipocytes
2.40881e-08	-0.79902	0.067	0	0.000881649	healthy	GPSM1	Adipocytes
2.40881e-08	-0.79902	0.067	0	0.000881649	healthy	IDI2	Adipocytes
2.40881e-08	-0.79902	0.067	0	0.000881649	healthy	ART5	Adipocytes
2.40881e-08	-0.79902	0.067	0	0.000881649	healthy	E2F8	Adipocytes
2.40881e-08	-0.79902	0.067	0	0.000881649	healthy	AL390755.1	Adipocytes
2.40881e-08	-0.79902	0.067	0	0.000881649	healthy	LINC02308	Adipocytes
2.40881e-08	-0.79902	0.067	0	0.000881649	healthy	AC012676.4	Adipocytes
2.40881e-08	-0.79902	0.067	0	0.000881649	healthy	AC022601.1	Adipocytes
1.32598e-60	1.35156	0.264	0.094	4.85321e-56	DMD	LINC01697	Endothelial
5.78344e-69	1.27241	0.265	0.085	2.1168e-64	DMD	AC105450.1	Endothelial
4.02026e-55	1.25687	0.164	0.034	1.47145e-50	DMD	FLRT2	Endothelial
6.78964e-53	1.10967	0.156	0.03	2.48507e-48	DMD	TACR1	Endothelial
2.14437e-74	1.1016	0.302	0.103	7.84862e-70	DMD	ZNF521	Endothelial
1.57884e-33	1.07408	0.143	0.048	5.77871e-29	DMD	CD200	Endothelial
4.91044e-77	1.07109	0.298	0.094	1.79727e-72	DMD	PLCG2	Endothelial
3.79538e-57	1.06401	0.23	0.074	1.38915e-52	DMD	TLL1	Endothelial
2.05349e-94	1.05534	0.591	0.317	7.51597e-90	DMD	MCTP1	Endothelial
5.79816e-30	1.05317	0.115	0.034	2.12219e-25	DMD	AC112487.1	Endothelial
1.63865e-77	1.03074	0.304	0.098	5.9976e-73	DMD	NAV3	Endothelial
1.3668e-41	1.01356	0.111	0.016	5.00263e-37	DMD	FAM13C	Endothelial
4.6385e-138	1.01052	0.605	0.27	1.69774e-133	DMD	TSHZ2	Endothelial
1.83437e-53	0.966482	0.155	0.029	6.71396e-49	DMD	ARHGEF28	Endothelial
2.36809e-50	0.960142	0.221	0.077	8.66746e-46	DMD	CCSER1	Endothelial
3.16904e-26	0.959247	0.075	0.013	1.1599e-21	DMD	MTRNR2L8	Endothelial
1.93307e-86	0.956689	0.363	0.128	7.07523e-82	DMD	TGFBR2	Endothelial
1.41065e-49	0.95379	0.156	0.034	5.16311e-45	DMD	IL33	Endothelial
1.48736e-68	0.942767	0.326	0.127	5.44388e-64	DMD	AL109930.1	Endothelial
1.04154e-32	0.916754	0.11	0.026	3.81213e-28	DMD	MMP16	Endothelial
1.14905e-31	0.914522	0.096	0.019	4.20564e-27	DMD	AC012409.2	Endothelial
4.22845e-38	0.901935	0.163	0.053	1.54766e-33	DMD	NR2F2-AS1	Endothelial
2.37776e-46	0.901684	0.207	0.072	8.70285e-42	DMD	LAMB1	Endothelial
2.81545e-27	0.896384	0.19	0.092	1.03048e-22	DMD	SLC9C1	Endothelial
1.2574e-47	0.8601	0.185	0.054	4.60223e-43	DMD	TGFBR3	Endothelial
3.19785e-32	0.858831	0.12	0.033	1.17044e-27	DMD	AC008050.1	Endothelial
5.09472e-37	0.858693	0.15	0.046	1.86472e-32	DMD	AC005550.2	Endothelial
1.35351e-55	0.845517	0.444	0.241	4.95399e-51	DMD	ZNF385D	Endothelial
2.39159e-38	0.844102	0.16	0.051	8.75348e-34	DMD	HDAC9	Endothelial
2.216e-14	0.837957	0.031	0.002	8.11076e-10	DMD	AC105402.3	Endothelial
3.28459e-18	0.820286	0.284	0.184	1.20219e-13	DMD	ADAMTS9	Endothelial
1.3528e-53	0.815216	0.264	0.1	4.95138e-49	DMD	CYYR1-AS1	Endothelial
1.9741e-24	0.810938	0.076	0.016	7.22541e-20	DMD	ADAMTSL1	Endothelial
2.91879e-46	0.807321	0.213	0.075	1.06831e-41	DMD	UBE2E2	Endothelial
5.0409e-27	0.804883	0.076	0.013	1.84502e-22	DMD	RAB3C	Endothelial
1.3672e-25	0.800926	0.098	0.028	5.00409e-21	DMD	PCDH17	Endothelial
4.91406e-40	0.795515	0.153	0.043	1.79859e-35	DMD	EPS8	Endothelial
2.11434e-40	0.789752	0.171	0.055	7.73871e-36	DMD	FBN1	Endothelial
1.34257e-29	0.787993	0.125	0.039	4.91394e-25	DMD	CEMIP2	Endothelial
1.639e-60	0.787411	0.299	0.114	5.99889e-56	DMD	THSD7A	Endothelial
3.42482e-35	0.769648	0.108	0.021	1.25352e-30	DMD	NLGN4Y	Endothelial
7.07361e-52	0.750859	0.2	0.056	2.58901e-47	DMD	UTY	Endothelial
7.54681e-95	0.750149	0.712	0.431	2.76221e-90	DMD	MAGI1	Endothelial
1.17613e-47	0.745701	0.289	0.129	4.30476e-43	DMD	AC097459.1	Endothelial
1.08578e-27	0.744989	0.123	0.041	3.97406e-23	DMD	CPXM2	Endothelial
2.66549e-57	0.737487	0.316	0.131	9.75595e-53	DMD	CMIP	Endothelial
1.24767e-18	0.73105	0.27	0.171	4.56661e-14	DMD	MTRNR2L12	Endothelial
2.6706e-38	0.726779	0.186	0.067	9.77468e-34	DMD	PLSCR4	Endothelial
1.26294e-41	0.720506	0.24	0.102	4.62247e-37	DMD	DLEU1	Endothelial
1.03155e-49	0.711174	0.263	0.104	3.77556e-45	DMD	ITPR1	Endothelial
4.31244e-32	0.711168	0.145	0.049	1.5784e-27	DMD	AC023509.6	Endothelial
6.67997e-25	0.707974	0.093	0.026	2.44494e-20	DMD	SEMA6D	Endothelial
8.50851e-31	0.704681	0.131	0.042	3.1142e-26	DMD	AL360091.3	Endothelial
5.76337e-35	0.688336	0.148	0.046	2.10945e-30	DMD	ARHGAP24	Endothelial
3.3416e-44	0.684168	0.271	0.118	1.22306e-39	DMD	HIPK3	Endothelial
4.3773e-20	0.681916	0.07	0.018	1.60214e-15	DMD	ZFHX3	Endothelial
2.77513e-43	0.679934	0.324	0.162	1.01572e-38	DMD	COL15A1	Endothelial
3.15046e-32	0.672002	0.132	0.04	1.1531e-27	DMD	PRCP	Endothelial
1.529e-48	0.668112	0.298	0.13	5.59628e-44	DMD	STARD9	Endothelial
7.79402e-26	0.652872	0.095	0.025	2.85269e-21	DMD	MAGI1-AS1	Endothelial
3.71396e-26	0.652251	0.149	0.061	1.35935e-21	DMD	ZFPM2-AS1	Endothelial
2.13111e-23	0.649928	0.078	0.018	7.80007e-19	DMD	AJ006995.1	Endothelial
6.69331e-28	0.633308	0.104	0.028	2.44982e-23	DMD	ARID5B	Endothelial
3.3768e-31	0.629947	0.166	0.065	1.23594e-26	DMD	ACTN1	Endothelial
1.78776e-25	0.623744	0.099	0.028	6.54339e-21	DMD	IL1R1	Endothelial
5.32524e-49	0.621888	0.351	0.166	1.94909e-44	DMD	JAM2	Endothelial
1.70928e-21	0.620482	0.066	0.013	6.25613e-17	DMD	AL391097.3	Endothelial
3.99734e-32	0.617352	0.126	0.036	1.46307e-27	DMD	KLHL3	Endothelial
8.44605e-16	0.617344	0.065	0.021	3.09134e-11	DMD	CHRM3	Endothelial
3.50298e-18	0.61308	0.055	0.011	1.28213e-13	DMD	CLVS1	Endothelial
5.41273e-23	0.612541	0.065	0.011	1.98111e-18	DMD	PVT1	Endothelial
1.41051e-32	0.611745	0.133	0.04	5.16262e-28	DMD	CFI	Endothelial
6.79378e-46	0.61128	0.31	0.141	2.48659e-41	DMD	FOXO1	Endothelial
6.08723e-20	0.605389	0.043	0.002	2.22799e-15	DMD	PHYHIPL	Endothelial
6.06123e-20	0.603911	0.095	0.034	2.21847e-15	DMD	GNA14-AS1	Endothelial
1.18644e-43	0.603184	0.331	0.166	4.34249e-39	DMD	SNTG2	Endothelial
1.0853e-57	0.599687	0.56	0.335	3.9723e-53	DMD	PKP4	Endothelial
2.81326e-54	0.599444	0.545	0.331	1.02968e-49	DMD	ADGRL4	Endothelial
1.92195e-29	0.597773	0.167	0.067	7.03452e-25	DMD	FAM241A	Endothelial
5.36222e-35	0.596712	0.23	0.103	1.96263e-30	DMD	RHOJ	Endothelial
1.05316e-31	0.596362	0.127	0.037	3.85466e-27	DMD	USP9Y	Endothelial
2.66004e-24	0.594865	0.119	0.044	9.736e-20	DMD	PRKAG2	Endothelial
1.71601e-22	0.594799	0.092	0.028	6.28076e-18	DMD	HRH1	Endothelial
5.58675e-21	0.592736	0.104	0.038	2.04481e-16	DMD	ST8SIA6-AS1	Endothelial
1.07283e-56	0.591689	0.486	0.26	3.92665e-52	DMD	MRTFB	Endothelial
2.68173e-56	0.590609	0.506	0.286	9.81539e-52	DMD	EBF1	Endothelial
5.78128e-29	0.587723	0.157	0.061	2.11601e-24	DMD	TFPI	Endothelial
4.22802e-19	0.585474	0.084	0.028	1.5475e-14	DMD	SLC16A7	Endothelial
1.19872e-30	0.581333	0.167	0.066	4.38742e-26	DMD	MYOF	Endothelial
6.77085e-31	0.580355	0.163	0.063	2.4782e-26	DMD	FRMD4B	Endothelial
6.02188e-26	0.578128	0.127	0.045	2.20407e-21	DMD	GNA14	Endothelial
2.25146e-31	0.572605	0.172	0.068	8.24057e-27	DMD	PDIA5	Endothelial
6.0384e-26	0.565365	0.126	0.045	2.21011e-21	DMD	BCL2L14	Endothelial
8.62615e-18	0.564953	0.066	0.018	3.15726e-13	DMD	EMC10	Endothelial
9.50375e-26	0.563853	0.157	0.067	3.47847e-21	DMD	PTPRE	Endothelial
4.91889e-18	0.562227	0.118	0.053	1.80036e-13	DMD	CFH	Endothelial
4.45491e-19	0.56115	0.102	0.04	1.63054e-14	DMD	SLC8A1-AS1	Endothelial
4.40299e-27	0.558607	0.09	0.021	1.61154e-22	DMD	ARL17B	Endothelial
1.17087e-23	0.558098	0.088	0.024	4.28548e-19	DMD	AC053513.1	Endothelial
2.41142e-26	0.554876	0.145	0.058	8.82603e-22	DMD	RAI14	Endothelial
7.70961e-38	0.554043	0.29	0.142	2.8218e-33	DMD	PGM5	Endothelial
3.58908e-20	0.553136	0.084	0.026	1.31364e-15	DMD	AP001037.1	Endothelial
1.19535e-30	0.552767	0.194	0.084	4.3751e-26	DMD	NR5A2	Endothelial
3.63167e-24	0.552492	0.226	0.125	1.32923e-19	DMD	SLC8A1	Endothelial
3.69413e-22	0.548949	0.162	0.078	1.35209e-17	DMD	DIAPH2-AS1	Endothelial
6.24828e-19	0.541849	0.057	0.011	2.28693e-14	DMD	MEG3	Endothelial
1.72255e-19	0.541758	0.094	0.034	6.30471e-15	DMD	LINC01117	Endothelial
7.58296e-20	0.541594	0.072	0.019	2.77544e-15	DMD	AL024474.2	Endothelial
2.3641e-22	0.537812	0.106	0.037	8.65284e-18	DMD	DOCK11	Endothelial
7.5459e-12	0.535402	0.066	0.028	2.76188e-07	DMD	FGF13	Endothelial
2.14121e-17	0.533221	0.091	0.035	7.83705e-13	DMD	ENPP2	Endothelial
3.80104e-20	0.53223	0.096	0.034	1.39122e-15	DMD	TMLHE-AS1	Endothelial
9.26739e-07	0.532115	0.039	0.018	0.0339196	DMD	EFNA5	Endothelial
7.45172e-27	0.527452	0.215	0.109	2.72741e-22	DMD	NPAS3	Endothelial
1.82216e-27	0.524378	0.168	0.072	6.6693e-23	DMD	IFI44	Endothelial
5.24186e-23	0.523459	0.139	0.059	1.91857e-18	DMD	GAB1	Endothelial
6.01858e-23	0.520737	0.085	0.023	2.20286e-18	DMD	AC007681.1	Endothelial
1.21912e-26	0.519693	0.134	0.049	4.4621e-22	DMD	ANKRD28	Endothelial
5.5063e-27	0.518968	0.164	0.07	2.01536e-22	DMD	SFMBT2	Endothelial
2.71856e-07	0.51709	0.028	0.009	0.0099502	DMD	PDE1A	Endothelial
3.7816e-33	0.516515	0.249	0.119	1.3841e-28	DMD	PBX1	Endothelial
4.88209e-20	0.514315	0.092	0.031	1.78689e-15	DMD	HIF1A	Endothelial
4.53506e-24	0.513018	0.151	0.066	1.65988e-19	DMD	SVIL	Endothelial
2.58996e-44	0.51267	0.377	0.194	9.47952e-40	DMD	ARHGEF3	Endothelial
2.38497e-25	0.51217	0.134	0.051	8.72923e-21	DMD	AP001011.1	Endothelial
5.40478e-43	0.511711	0.358	0.185	1.9782e-38	DMD	RORA	Endothelial
9.20929e-27	0.511046	0.19	0.088	3.37069e-22	DMD	CACHD1	Endothelial
3.80137e-19	0.510154	0.058	0.012	1.39134e-14	DMD	TMEM273	Endothelial
2.80104e-22	0.509456	0.14	0.061	1.02521e-17	DMD	BNC2	Endothelial
4.19438e-17	0.507899	0.076	0.025	1.53519e-12	DMD	AC087286.2	Endothelial
4.34833e-29	0.50784	0.213	0.1	1.59153e-24	DMD	NEB	Endothelial
1.05295e-20	0.50627	0.098	0.035	3.85392e-16	DMD	SDCBP2-AS1	Endothelial
9.10621e-38	0.504548	0.35	0.181	3.33296e-33	DMD	TTN	Endothelial
8.88408e-07	0.503399	0.03	0.011	0.0325166	DMD	LINC02208	Endothelial
8.8672e-10	0.502963	0.019	0.001	3.24548e-05	DMD	FOS	Endothelial
9.57872e-21	0.502179	0.095	0.032	3.50591e-16	DMD	MYCBP2-AS1	Endothelial
3.04455e-16	0.502017	0.048	0.009	1.11433e-11	DMD	AC105114.2	Endothelial
3.2143e-21	0.501853	0.113	0.044	1.17647e-16	DMD	AL365295.1	Endothelial
2.22463e-20	0.49968	0.068	0.015	8.14237e-16	DMD	MYO5A	Endothelial
3.98516e-23	0.497702	0.123	0.048	1.45861e-18	DMD	ITGB4	Endothelial
3.18423e-14	0.496691	0.06	0.019	1.16546e-09	DMD	FRMPD4	Endothelial
2.59998e-17	0.495576	0.075	0.024	9.51617e-13	DMD	AP002518.2	Endothelial
3.0734e-17	0.494853	0.08	0.028	1.12489e-12	DMD	TRIM5	Endothelial
3.92884e-32	0.494661	0.277	0.141	1.43799e-27	DMD	CRYBG3	Endothelial
5.50986e-18	0.493459	0.054	0.011	2.01666e-13	DMD	ARHGAP28	Endothelial
3.14736e-29	0.493048	0.184	0.079	1.15197e-24	DMD	DISC1	Endothelial
7.71872e-23	0.492323	0.094	0.028	2.82513e-18	DMD	AC020909.2	Endothelial
6.00348e-16	0.489918	0.068	0.022	2.19733e-11	DMD	Z82215.1	Endothelial
2.96361e-20	0.489325	0.115	0.047	1.08471e-15	DMD	PLVAP	Endothelial
7.85825e-16	0.488665	0.091	0.038	2.8762e-11	DMD	MT-ND4L	Endothelial
9.54859e-27	0.48779	0.21	0.104	3.49488e-22	DMD	ANKUB1	Endothelial
6.702e-19	0.487237	0.083	0.027	2.453e-14	DMD	CARMIL1	Endothelial
6.01268e-31	0.485802	0.181	0.074	2.2007e-26	DMD	TMEM135	Endothelial
4.37407e-17	0.485736	0.063	0.017	1.60095e-12	DMD	TCTEX1D1	Endothelial
1.30999e-14	0.485153	0.047	0.011	4.7947e-10	DMD	TMC1	Endothelial
2.24829e-19	0.481809	0.09	0.031	8.22895e-15	DMD	AC130650.1	Endothelial
5.10699e-26	0.480853	0.159	0.068	1.86921e-21	DMD	LMCD1-AS1	Endothelial
4.01168e-13	0.479553	0.066	0.025	1.46831e-08	DMD	UGCG	Endothelial
1.6904e-16	0.475828	0.051	0.011	6.18705e-12	DMD	SELP	Endothelial
5.42374e-28	0.47564	0.205	0.097	1.98514e-23	DMD	EGLN1	Endothelial
5.51212e-17	0.474894	0.099	0.041	2.01749e-12	DMD	AC008771.1	Endothelial
2.28466e-23	0.472423	0.132	0.052	8.36209e-19	DMD	ITPRID2	Endothelial
5.1409e-17	0.470836	0.101	0.043	1.88162e-12	DMD	KDR	Endothelial
1.47188e-08	0.469962	0.037	0.013	0.000538725	DMD	GPM6A	Endothelial
1.2174e-17	0.468488	0.065	0.018	4.45579e-13	DMD	PLK2	Endothelial
5.7789e-16	0.46487	0.053	0.013	2.11514e-11	DMD	AC004160.1	Endothelial
1.56901e-34	0.463222	0.294	0.151	5.74272e-30	DMD	ZFPM2	Endothelial
1.39411e-15	0.461185	0.059	0.016	5.10259e-11	DMD	SLC2A3	Endothelial
7.78979e-31	0.461072	0.209	0.093	2.85114e-26	DMD	LINC01695	Endothelial
3.95646e-15	0.460551	0.061	0.019	1.44811e-10	DMD	CA3	Endothelial
7.39488e-23	0.458416	0.119	0.044	2.7066e-18	DMD	SNCAIP	Endothelial
3.44556e-21	0.45662	0.1	0.035	1.26111e-16	DMD	BMERB1	Endothelial
2.17109e-18	0.455245	0.09	0.033	7.94641e-14	DMD	RASA4	Endothelial
9.92886e-19	0.455064	0.136	0.065	3.63406e-14	DMD	NRP2	Endothelial
3.9009e-11	0.454942	0.024	0.002	1.42777e-06	DMD	SOCS3	Endothelial
6.05503e-27	0.454492	0.369	0.23	2.2162e-22	DMD	AC007319.1	Endothelial
2.20047e-15	0.45418	0.054	0.014	8.05395e-11	DMD	HMCN2	Endothelial
1.48375e-18	0.453016	0.066	0.017	5.43066e-14	DMD	MAP2K6	Endothelial
2.03364e-22	0.452985	0.13	0.053	7.44332e-18	DMD	PLEKHA7	Endothelial
2.67665e-30	0.451972	0.217	0.1	9.79681e-26	DMD	TSPAN7	Endothelial
5.80595e-11	0.451297	0.03	0.005	2.12503e-06	DMD	MMRN1	Endothelial
2.01358e-11	0.449934	0.07	0.031	7.3699e-07	DMD	MYO1B	Endothelial
3.27535e-17	0.44993	0.075	0.025	1.19881e-12	DMD	ADGRG6	Endothelial
2.83919e-31	0.449793	0.155	0.054	1.03917e-26	DMD	PRKY	Endothelial
9.29474e-15	0.449324	0.038	0.005	3.40197e-10	DMD	ABCA1	Endothelial
3.47439e-17	0.448902	0.08	0.028	1.27166e-12	DMD	SERINC5	Endothelial
2.8783e-41	0.444408	0.549	0.366	1.05349e-36	DMD	AL589693.1	Endothelial
2.41956e-17	0.44314	0.087	0.032	8.85584e-13	DMD	LARS	Endothelial
2.05285e-15	0.44291	0.037	0.004	7.51364e-11	DMD	LINC01673	Endothelial
8.08245e-16	0.442541	0.051	0.012	2.95826e-11	DMD	NDST1	Endothelial
1.23031e-17	0.440935	0.088	0.033	4.50306e-13	DMD	AC090630.1	Endothelial
1.32887e-16	0.440129	0.084	0.031	4.8638e-12	DMD	STEAP1B	Endothelial
5.42814e-15	0.438005	0.082	0.033	1.98676e-10	DMD	EVL	Endothelial
8.23593e-30	0.436929	0.24	0.118	3.01443e-25	DMD	NCOA7	Endothelial
6.67515e-49	0.434762	0.735	0.509	2.44317e-44	DMD	NEAT1	Endothelial
9.92573e-20	0.434505	0.104	0.039	3.63292e-15	DMD	RNF169	Endothelial
1.28192e-15	0.434395	0.058	0.016	4.69195e-11	DMD	AL161457.2	Endothelial
8.53411e-13	0.433836	0.046	0.013	3.12357e-08	DMD	DNAH14	Endothelial
3.7842e-10	0.433181	0.042	0.014	1.38506e-05	DMD	ABI3BP	Endothelial
2.11526e-44	0.432338	0.555	0.339	7.74206e-40	DMD	RALGAPA2	Endothelial
1.60345e-15	0.431597	0.09	0.037	5.86879e-11	DMD	AC211433.1	Endothelial
9.70722e-20	0.431103	0.096	0.034	3.55294e-15	DMD	RFX3-AS1	Endothelial
1.49865e-11	0.430244	0.027	0.003	5.4852e-07	DMD	COL1A2	Endothelial
1.2246e-19	0.429941	0.137	0.063	4.48215e-15	DMD	MAN1A1	Endothelial
1.18282e-07	0.427948	0.026	0.007	0.00432924	DMD	TSPAN5	Endothelial
8.09403e-13	0.427651	0.059	0.021	2.96249e-08	DMD	CHST15	Endothelial
5.0418e-17	0.427573	0.088	0.034	1.84535e-12	DMD	PPP4R3A	Endothelial
1.26902e-38	0.425383	0.313	0.153	4.64475e-34	DMD	KANSL1	Endothelial
7.91295e-25	0.423506	0.229	0.121	2.89622e-20	DMD	IFI16	Endothelial
1.93735e-15	0.421377	0.063	0.02	7.09089e-11	DMD	MYO18A	Endothelial
2.91562e-20	0.420036	0.173	0.088	1.06715e-15	DMD	ST8SIA6	Endothelial
2.17365e-23	0.419282	0.188	0.092	7.95577e-19	DMD	PLSCR1	Endothelial
6.28715e-10	0.418185	0.023	0.003	2.30116e-05	DMD	LINC02055	Endothelial
1.04922e-17	0.417852	0.114	0.05	3.84027e-13	DMD	AC068282.1	Endothelial
1.5558e-22	0.41774	0.172	0.083	5.69439e-18	DMD	ESR2	Endothelial
2.02647e-12	0.417042	0.112	0.06	7.41707e-08	DMD	SYT1	Endothelial
3.2659e-17	0.416764	0.1	0.041	1.19535e-12	DMD	DENND6A-AS1	Endothelial
4.00865e-12	0.416752	0.072	0.031	1.46721e-07	DMD	PDGFD	Endothelial
4.09284e-14	0.414523	0.046	0.011	1.49802e-09	DMD	ABLIM2	Endothelial
3.43846e-07	0.413459	0.025	0.007	0.0125851	DMD	MPP7	Endothelial
7.06355e-14	0.412593	0.043	0.009	2.58533e-09	DMD	AC107223.1	Endothelial
1.58681e-14	0.411238	0.063	0.021	5.80787e-10	DMD	RHD	Endothelial
1.06244e-13	0.410958	0.099	0.048	3.88865e-09	DMD	FBXL2	Endothelial
3.57944e-30	0.409567	0.187	0.077	1.31011e-25	DMD	TTTY14	Endothelial
1.91371e-16	0.409547	0.077	0.027	7.00435e-12	DMD	ATP11C	Endothelial
1.07658e-12	0.409257	0.038	0.008	3.94037e-08	DMD	CERS6	Endothelial
2.75866e-20	0.40886	0.127	0.055	1.0097e-15	DMD	SNRNP70	Endothelial
6.67714e-42	0.408814	0.532	0.325	2.4439e-37	DMD	FLI1	Endothelial
3.27983e-26	0.408798	0.226	0.115	1.20045e-21	DMD	RAB11A	Endothelial
5.56102e-16	0.408625	0.058	0.015	2.03539e-11	DMD	BZW2	Endothelial
2.03729e-18	0.408242	0.125	0.057	7.45668e-14	DMD	AC004594.1	Endothelial
2.42661e-25	0.407925	0.231	0.121	8.88163e-21	DMD	GLS	Endothelial
9.90565e-16	0.407859	0.078	0.029	3.62557e-11	DMD	CHSY1	Endothelial
1.74865e-17	0.407065	0.1	0.041	6.40022e-13	DMD	MEF2C-AS2	Endothelial
1.2946e-12	0.406506	0.043	0.011	4.73835e-08	DMD	LINC01235	Endothelial
3.47531e-27	0.406139	0.26	0.139	1.272e-22	DMD	SMAD1	Endothelial
2.92916e-22	0.405138	0.137	0.058	1.0721e-17	DMD	LIMS1	Endothelial
1.48956e-12	0.405137	0.051	0.016	5.45192e-08	DMD	ASAP3	Endothelial
1.0444e-15	0.405047	0.084	0.033	3.8226e-11	DMD	AL133268.4	Endothelial
6.0732e-16	0.404633	0.073	0.025	2.22285e-11	DMD	BMP2K	Endothelial
4.24634e-23	0.404525	0.179	0.087	1.5542e-18	DMD	NXN	Endothelial
4.84333e-15	0.403259	0.077	0.029	1.77271e-10	DMD	GNG12-AS1	Endothelial
2.85742e-23	0.402673	0.146	0.062	1.04584e-18	DMD	GNB4	Endothelial
5.73581e-18	0.400936	0.092	0.034	2.09936e-13	DMD	GABPB1-AS1	Endothelial
1.84601e-18	0.400211	0.1	0.039	6.7566e-14	DMD	GPATCH2	Endothelial
1.63954e-21	0.40015	0.16	0.075	6.00088e-17	DMD	ZNF423	Endothelial
4.23416e-20	0.399944	0.13	0.057	1.54975e-15	DMD	AHR	Endothelial
1.24217e-11	0.398813	0.049	0.016	4.54646e-07	DMD	ITIH5	Endothelial
2.92353e-12	0.398265	0.032	0.005	1.07004e-07	DMD	FAP	Endothelial
2.4182e-17	0.397521	0.092	0.036	8.85087e-13	DMD	BCR	Endothelial
1.33848e-20	0.397286	0.16	0.079	4.89898e-16	DMD	SNED1	Endothelial
3.19348e-12	0.396926	0.03	0.004	1.16885e-07	DMD	SNAP25-AS1	Endothelial
1.26964e-13	0.391825	0.074	0.029	4.64702e-09	DMD	AC015923.1	Endothelial
3.08008e-22	0.391584	0.123	0.048	1.12734e-17	DMD	ASPH	Endothelial
3.49403e-39	0.390433	0.46	0.267	1.27885e-34	DMD	PPP3CA	Endothelial
2.70945e-24	0.389794	0.194	0.095	9.91684e-20	DMD	LMCD1	Endothelial
9.06116e-12	0.389675	0.031	0.005	3.31647e-07	DMD	LINC02582	Endothelial
2.1026e-17	0.389444	0.09	0.034	7.69571e-13	DMD	MYL1	Endothelial
5.06547e-19	0.388762	0.119	0.051	1.85401e-14	DMD	OSBPL10	Endothelial
1.14189e-20	0.387696	0.155	0.074	4.17945e-16	DMD	MET	Endothelial
7.01838e-13	0.387311	0.084	0.038	2.5688e-08	DMD	FBLN2	Endothelial
2.06177e-10	0.386286	0.06	0.026	7.54627e-06	DMD	NLGN1	Endothelial
2.44171e-20	0.386034	0.143	0.066	8.93688e-16	DMD	CTNNAL1	Endothelial
3.91118e-31	0.384971	0.266	0.132	1.43153e-26	DMD	AKAP13	Endothelial
3.50464e-15	0.383374	0.087	0.036	1.28273e-10	DMD	AC090971.2	Endothelial
1.60539e-08	0.382461	0.024	0.005	0.000587591	DMD	CNTN4	Endothelial
7.702e-13	0.382409	0.055	0.018	2.81901e-08	DMD	MATN2	Endothelial
3.33122e-28	0.382342	0.222	0.106	1.21926e-23	DMD	SEMA6A-AS1	Endothelial
1.15537e-19	0.381882	0.186	0.098	4.22878e-15	DMD	TRIM13	Endothelial
2.10877e-15	0.381694	0.061	0.018	7.71832e-11	DMD	LRRC37A2	Endothelial
3.47061e-16	0.381522	0.057	0.015	1.27028e-11	DMD	MCUB	Endothelial
5.61748e-24	0.379988	0.15	0.064	2.05605e-19	DMD	SPNS2	Endothelial
8.22444e-22	0.379618	0.138	0.059	3.01023e-17	DMD	OGT	Endothelial
5.72727e-14	0.378742	0.067	0.024	2.09624e-09	DMD	SLC5A4-AS1	Endothelial
1.84177e-10	0.378433	0.043	0.014	6.74107e-06	DMD	TRABD2B	Endothelial
1.42515e-13	0.377826	0.054	0.016	5.21621e-09	DMD	AC012404.1	Endothelial
1.09438e-18	0.377794	0.138	0.066	4.00554e-14	DMD	MFSD4B	Endothelial
1.36499e-14	0.377431	0.064	0.021	4.99601e-10	DMD	CCDC149	Endothelial
2.73618e-13	0.376995	0.052	0.015	1.00147e-08	DMD	CERNA1	Endothelial
6.73723e-21	0.375962	0.155	0.073	2.46589e-16	DMD	DENND4A	Endothelial
2.63377e-12	0.375715	0.064	0.025	9.63986e-08	DMD	MACROD2	Endothelial
3.6273e-22	0.375669	0.161	0.074	1.32763e-17	DMD	STAT3	Endothelial
4.73041e-10	0.374497	0.059	0.025	1.73138e-05	DMD	AC023051.1	Endothelial
1.2835e-25	0.374082	0.229	0.118	4.69773e-21	DMD	REV3L	Endothelial
2.69978e-11	0.373491	0.02	0	9.88145e-07	DMD	ACTC1	Endothelial
3.59134e-11	0.373131	0.051	0.018	1.31447e-06	DMD	MMP24	Endothelial
1.40866e-15	0.373109	0.073	0.025	5.15583e-11	DMD	EYS	Endothelial
4.59422e-18	0.372173	0.113	0.049	1.68153e-13	DMD	ARMCX4	Endothelial
2.66162e-11	0.372026	0.048	0.016	9.7418e-07	DMD	OBSCN	Endothelial
7.01348e-28	0.371777	0.237	0.118	2.567e-23	DMD	FAT4	Endothelial
1.14822e-22	0.371173	0.193	0.097	4.20262e-18	DMD	SH3RF3	Endothelial
3.73772e-11	0.370959	0.059	0.023	1.36804e-06	DMD	LYPLA1	Endothelial
2.17284e-15	0.370474	0.551	0.419	7.95283e-11	DMD	ARL15	Endothelial
2.2234e-15	0.367642	0.068	0.022	8.13786e-11	DMD	LHFPL2	Endothelial
4.89128e-14	0.367525	0.06	0.019	1.79026e-09	DMD	FBXW8	Endothelial
1.09052e-10	0.366853	0.035	0.009	3.9914e-06	DMD	ADAM22	Endothelial
1.40236e-10	0.366507	0.031	0.006	5.13277e-06	DMD	CP	Endothelial
1.16847e-24	0.366068	0.192	0.092	4.27671e-20	DMD	ANKRD10	Endothelial
1.47273e-10	0.365811	0.045	0.015	5.39034e-06	DMD	UBA6-AS1	Endothelial
1.21924e-12	0.365704	0.042	0.01	4.46253e-08	DMD	RIOX2	Endothelial
4.45775e-26	0.36464	0.218	0.108	1.63158e-21	DMD	TBC1D22A	Endothelial
1.07241e-12	0.364447	0.044	0.011	3.92511e-08	DMD	TSPAN12	Endothelial
1.30946e-15	0.362689	0.056	0.015	4.79276e-11	DMD	KDM5D	Endothelial
6.77146e-15	0.362557	0.051	0.013	2.47842e-10	DMD	PTK2B	Endothelial
8.28458e-14	0.362442	0.105	0.051	3.03224e-09	DMD	AC008014.1	Endothelial
2.19333e-12	0.362385	0.051	0.016	8.0278e-08	DMD	CCDC178	Endothelial
8.40694e-14	0.362382	0.097	0.046	3.07702e-09	DMD	CNKSR3	Endothelial
3.69474e-20	0.361747	0.153	0.074	1.35231e-15	DMD	MYO5C	Endothelial
1.73861e-09	0.36159	0.083	0.044	6.36348e-05	DMD	NIBAN1	Endothelial
1.31261e-16	0.360732	0.109	0.048	4.80428e-12	DMD	SLC12A6	Endothelial
2.02574e-18	0.360532	0.117	0.051	7.4144e-14	DMD	ACKR1	Endothelial
1.99363e-16	0.36048	0.113	0.051	7.29687e-12	DMD	RFC3	Endothelial
5.29042e-18	0.360412	0.101	0.04	1.93635e-13	DMD	TRIM22	Endothelial
1.70166e-12	0.359762	0.051	0.016	6.22823e-08	DMD	Z82217.1	Endothelial
7.85325e-23	0.359608	0.224	0.12	2.87437e-18	DMD	IFI44L	Endothelial
5.94734e-20	0.358775	0.118	0.048	2.17679e-15	DMD	ZNF462	Endothelial
5.21987e-14	0.358321	0.109	0.054	1.91052e-09	DMD	ELMO1-AS1	Endothelial
4.38783e-23	0.35738	0.222	0.118	1.60599e-18	DMD	SNRK	Endothelial
1.82596e-08	0.356653	0.023	0.004	0.000668321	DMD	EPHA6	Endothelial
9.84654e-09	0.355888	0.045	0.018	0.000360393	DMD	CCDC3	Endothelial
9.00705e-14	0.35564	0.082	0.035	3.29667e-09	DMD	GLIS3	Endothelial
4.21611e-14	0.35489	0.083	0.035	1.54314e-09	DMD	AC025159.1	Endothelial
6.15346e-10	0.353797	0.039	0.012	2.25223e-05	DMD	MOB3B	Endothelial
4.39391e-10	0.353768	0.061	0.027	1.60821e-05	DMD	FHIT	Endothelial
6.78422e-08	0.353505	0.044	0.019	0.00248309	DMD	KLHL4	Endothelial
9.79311e-15	0.353273	0.069	0.024	3.58437e-10	DMD	USP3-AS1	Endothelial
1.69752e-09	0.352985	0.026	0.005	6.21309e-05	DMD	COL3A1	Endothelial
9.90808e-10	0.351626	0.022	0.002	3.62646e-05	DMD	COL1A1	Endothelial
5.20441e-27	0.351257	0.303	0.172	1.90487e-22	DMD	ELK3	Endothelial
2.3775e-11	0.351068	0.048	0.016	8.70189e-07	DMD	AC073342.1	Endothelial
6.53508e-09	0.350055	0.037	0.012	0.00023919	DMD	PRKG1	Endothelial
5.35055e-12	0.349915	0.05	0.016	1.95835e-07	DMD	AC022137.4	Endothelial
2.74378e-24	0.349578	0.287	0.166	1.00425e-19	DMD	LYST	Endothelial
1.43907e-19	0.349336	0.124	0.053	5.26712e-15	DMD	RREB1	Endothelial
8.915e-22	0.349332	0.216	0.117	3.26298e-17	DMD	BACE2	Endothelial
1.05526e-12	0.348713	0.061	0.022	3.86237e-08	DMD	LHX6	Endothelial
1.33429e-08	0.348327	0.052	0.023	0.000488362	DMD	AC093801.1	Endothelial
9.87941e-11	0.34717	0.03	0.006	3.61596e-06	DMD	SMAD1-AS2	Endothelial
1.60519e-21	0.346661	0.213	0.114	5.87514e-17	DMD	SUN1	Endothelial
1.55908e-13	0.346183	0.077	0.031	5.7064e-09	DMD	MINK1	Endothelial
1.13635e-10	0.345106	0.038	0.01	4.15914e-06	DMD	SH3TC1	Endothelial
1.28127e-11	0.345092	0.054	0.019	4.68957e-07	DMD	AL133480.1	Endothelial
2.96694e-14	0.343914	0.079	0.031	1.08593e-09	DMD	GTDC1	Endothelial
3.4455e-11	0.34345	0.036	0.008	1.26109e-06	DMD	CCDC85C	Endothelial
2.07284e-17	0.342266	0.101	0.041	7.58679e-13	DMD	ALPK1	Endothelial
1.74117e-18	0.342108	0.111	0.046	6.37286e-14	DMD	CEP170	Endothelial
4.14679e-15	0.341813	0.092	0.039	1.51777e-10	DMD	SNTB2	Endothelial
7.12768e-11	0.341464	0.046	0.015	2.6088e-06	DMD	SLCO2B1	Endothelial
1.49031e-16	0.340447	0.109	0.048	5.45469e-12	DMD	ARRB1	Endothelial
7.88463e-10	0.340094	0.023	0.003	2.88585e-05	DMD	LINC02197	Endothelial
4.69815e-14	0.339733	0.072	0.028	1.71957e-09	DMD	AL356599.1	Endothelial
1.7134e-15	0.338825	0.105	0.048	6.27123e-11	DMD	BTD	Endothelial
3.24358e-11	0.338379	0.029	0.004	1.18718e-06	DMD	PLA2R1	Endothelial
1.0162e-10	0.338368	0.031	0.006	3.7194e-06	DMD	AL136985.3	Endothelial
5.18313e-12	0.337924	0.064	0.025	1.89708e-07	DMD	LINC01197	Endothelial
3.38189e-13	0.337772	0.078	0.033	1.23781e-08	DMD	ATN1	Endothelial
7.44244e-14	0.336144	0.077	0.031	2.72401e-09	DMD	SH3PXD2A	Endothelial
7.85069e-17	0.335258	0.113	0.051	2.87343e-12	DMD	CD99	Endothelial
1.68805e-20	0.333886	0.19	0.1	6.17842e-16	DMD	LINC00513	Endothelial
1.41404e-12	0.33367	0.081	0.036	5.17553e-08	DMD	AC006160.1	Endothelial
9.59227e-12	0.333182	0.041	0.011	3.51087e-07	DMD	TOX2	Endothelial
1.43765e-07	0.333149	0.013	0	0.00526195	DMD	LINC02315	Endothelial
8.12678e-13	0.333071	0.05	0.015	2.97448e-08	DMD	AC083855.2	Endothelial
1.47949e-25	0.332653	0.226	0.114	5.41509e-21	DMD	LAMA3	Endothelial
4.67545e-07	0.332349	0.038	0.016	0.0171126	DMD	NTN1	Endothelial
2.50825e-12	0.332293	0.065	0.025	9.18044e-08	DMD	MFAP3	Endothelial
4.20972e-12	0.332093	0.077	0.035	1.5408e-07	DMD	MTA3	Endothelial
2.06047e-13	0.331913	0.117	0.061	7.54154e-09	DMD	CCNL2	Endothelial
1.29686e-10	0.331704	0.037	0.01	4.74662e-06	DMD	MFSD4A	Endothelial
1.326e-16	0.331142	0.091	0.036	4.85331e-12	DMD	FAM13A	Endothelial
2.57764e-16	0.33114	0.148	0.078	9.43441e-12	DMD	ATP11A	Endothelial
4.716e-12	0.330305	0.048	0.015	1.7261e-07	DMD	PRSS48	Endothelial
1.01022e-31	0.328846	0.462	0.282	3.69752e-27	DMD	RERE	Endothelial
1.7742e-08	0.326636	0.038	0.014	0.000649374	DMD	RPS29	Endothelial
3.33221e-20	0.326553	0.222	0.124	1.21962e-15	DMD	NUAK1	Endothelial
1.68951e-11	0.326087	0.035	0.007	6.18378e-07	DMD	AL391097.1	Endothelial
1.34305e-11	0.325572	0.075	0.034	4.91569e-07	DMD	TUBGCP3	Endothelial
4.00767e-11	0.323655	0.036	0.009	1.46685e-06	DMD	LRRC49	Endothelial
9.63593e-12	0.322983	0.049	0.016	3.52685e-07	DMD	CEMIP	Endothelial
2.97476e-24	0.322925	0.234	0.124	1.08879e-19	DMD	SULF2	Endothelial
2.43856e-13	0.322761	0.105	0.052	8.92536e-09	DMD	OXNAD1	Endothelial
9.34621e-08	0.322701	0.034	0.012	0.00342081	DMD	AL353586.1	Endothelial
6.09148e-15	0.322325	0.13	0.067	2.22954e-10	DMD	C22orf34	Endothelial
1.00423e-11	0.322047	0.035	0.007	3.67557e-07	DMD	FSIP2	Endothelial
4.63627e-12	0.321763	0.062	0.024	1.69692e-07	DMD	MLPH	Endothelial
4.06349e-10	0.321694	0.021	0.001	1.48728e-05	DMD	AL355474.1	Endothelial
1.43945e-09	0.320853	0.093	0.051	5.26854e-05	DMD	SHOC1	Endothelial
1.22877e-15	0.320121	0.196	0.117	4.4974e-11	DMD	AP003086.1	Endothelial
2.42777e-09	0.320102	0.028	0.006	8.88589e-05	DMD	AC024619.3	Endothelial
3.48101e-10	0.319753	0.069	0.033	1.27408e-05	DMD	AC098829.1	Endothelial
6.04763e-10	0.319494	0.038	0.011	2.21349e-05	DMD	CYSLTR1	Endothelial
1.3474e-08	0.318821	0.046	0.019	0.000493162	DMD	PLXNA4	Endothelial
2.61165e-23	0.318669	0.209	0.106	9.55889e-19	DMD	CAMK2D	Endothelial
1.40068e-11	0.318257	0.083	0.04	5.12665e-07	DMD	UGP2	Endothelial
1.38158e-11	0.3178	0.045	0.014	5.05671e-07	DMD	ZNF516	Endothelial
4.99124e-14	0.317697	0.097	0.045	1.82685e-09	DMD	PROS1	Endothelial
1.26655e-19	0.317678	0.142	0.066	4.6357e-15	DMD	PARP4	Endothelial
9.53536e-16	0.317081	0.082	0.031	3.49004e-11	DMD	SH3BP5	Endothelial
1.88898e-11	0.316923	0.058	0.022	6.91385e-07	DMD	ZNF814	Endothelial
1.08877e-09	0.316583	0.06	0.027	3.985e-05	DMD	TMEFF2	Endothelial
6.22277e-13	0.316511	0.047	0.013	2.2776e-08	DMD	MPV17L	Endothelial
2.13202e-11	0.315764	0.048	0.016	7.8034e-07	DMD	PKP4-AS1	Endothelial
1.61293e-10	0.314028	0.047	0.016	5.9035e-06	DMD	AL020995.1	Endothelial
1.31101e-09	0.314011	0.063	0.029	4.79842e-05	DMD	MARCH3	Endothelial
1.68e-18	0.313558	0.12	0.052	6.14895e-14	DMD	SMARCC1	Endothelial
1.22373e-12	0.313506	0.085	0.039	4.47898e-08	DMD	AC011092.2	Endothelial
4.84754e-20	0.313498	0.164	0.081	1.77425e-15	DMD	HMBOX1	Endothelial
7.03694e-10	0.313124	0.054	0.022	2.57559e-05	DMD	GAS5	Endothelial
5.87456e-12	0.312142	0.099	0.05	2.15015e-07	DMD	SAT1	Endothelial
5.14759e-12	0.311992	0.066	0.027	1.88407e-07	DMD	AC117834.1	Endothelial
2.72728e-16	0.311462	0.115	0.053	9.98211e-12	DMD	RBM33	Endothelial
7.90116e-09	0.310882	0.024	0.005	0.00028919	DMD	STK33	Endothelial
1.7503e-09	0.310833	0.031	0.007	6.40627e-05	DMD	PLCE1	Endothelial
8.4764e-15	0.310564	0.133	0.069	3.10245e-10	DMD	GOLGA8A	Endothelial
1.10296e-12	0.309989	0.063	0.023	4.03695e-08	DMD	AC007384.1	Endothelial
1.0968e-13	0.309455	0.089	0.04	4.0144e-09	DMD	PDLIM1	Endothelial
8.76115e-22	0.308275	0.278	0.162	3.20667e-17	DMD	CPNE8	Endothelial
1.42169e-14	0.307219	0.102	0.047	5.20354e-10	DMD	RASSF3	Endothelial
2.6449e-09	0.306343	0.046	0.018	9.6806e-05	DMD	LOXL2	Endothelial
1.10872e-22	0.306116	0.162	0.074	4.05803e-18	DMD	PPP2R5A	Endothelial
1.12988e-12	0.305789	0.057	0.02	4.13548e-08	DMD	TRERF1	Endothelial
4.19375e-07	0.305663	0.037	0.015	0.0153496	DMD	STK32B	Endothelial
2.89901e-12	0.305347	0.067	0.027	1.06107e-07	DMD	CLIC2	Endothelial
1.13959e-11	0.304958	0.067	0.028	4.17102e-07	DMD	AC007098.1	Endothelial
5.09566e-09	0.304635	0.051	0.022	0.000186506	DMD	GCNT2	Endothelial
3.17253e-09	0.303792	0.03	0.007	0.000116118	DMD	AC004253.1	Endothelial
4.57541e-25	0.303587	0.349	0.21	1.67465e-20	DMD	TPO	Endothelial
5.0618e-11	0.303455	0.077	0.037	1.85267e-06	DMD	LPCAT2	Endothelial
2.29057e-10	0.302761	0.064	0.028	8.3837e-06	DMD	MID1	Endothelial
2.7354e-12	0.302439	0.077	0.034	1.00118e-07	DMD	GBP2	Endothelial
4.46569e-11	0.302305	0.038	0.01	1.63449e-06	DMD	CNN3	Endothelial
1.70104e-13	0.30183	0.093	0.043	6.22596e-09	DMD	SOD2	Endothelial
2.04312e-09	0.301689	0.023	0.003	7.47802e-05	DMD	VCAN	Endothelial
8.61135e-07	0.301684	0.015	0.002	0.0315184	DMD	UBASH3B	Endothelial
3.08795e-09	0.301651	0.069	0.034	0.000113022	DMD	MTHFD1L	Endothelial
4.25452e-11	0.301397	0.077	0.037	1.5572e-06	DMD	ABCD4	Endothelial
4.57282e-15	0.300897	0.1	0.044	1.6737e-10	DMD	TBC1D15	Endothelial
4.87223e-12	0.300551	0.056	0.02	1.78328e-07	DMD	RNF213-AS1	Endothelial
5.8293e-14	0.300285	0.073	0.028	2.13358e-09	DMD	NFATC2	Endothelial
1.20609e-11	0.299914	0.067	0.028	4.41441e-07	DMD	SPRED1	Endothelial
7.3321e-12	0.299449	0.124	0.07	2.68362e-07	DMD	AC027018.1	Endothelial
5.99e-10	0.299326	0.034	0.009	2.1924e-05	DMD	DOK5	Endothelial
2.70001e-11	0.299097	0.076	0.035	9.88232e-07	DMD	MYH7	Endothelial
1.32179e-09	0.298718	0.052	0.022	4.83787e-05	DMD	PPL	Endothelial
4.14714e-12	0.29713	0.077	0.034	1.51789e-07	DMD	AC136489.1	Endothelial
3.16619e-15	0.296949	0.114	0.054	1.15886e-10	DMD	AP002336.2	Endothelial
1.60546e-15	0.29688	0.122	0.06	5.87613e-11	DMD	AC002463.1	Endothelial
2.78897e-19	0.296135	0.148	0.07	1.02079e-14	DMD	MAP3K3	Endothelial
1.01268e-29	0.296081	0.661	0.462	3.7065e-25	DMD	FTX	Endothelial
3.84912e-31	0.295764	0.469	0.289	1.40881e-26	DMD	PREX2	Endothelial
1.05541e-17	0.295568	0.16	0.082	3.8629e-13	DMD	FAM120B	Endothelial
9.82036e-17	0.295323	0.145	0.074	3.59435e-12	DMD	UBE2D3	Endothelial
8.14737e-13	0.295087	0.048	0.014	2.98202e-08	DMD	CTSC	Endothelial
3.20529e-09	0.29505	0.02	0.002	0.000117317	DMD	MYH3	Endothelial
4.84569e-20	0.294598	0.194	0.103	1.77357e-15	DMD	LAMC1	Endothelial
2.73033e-09	0.293897	0.029	0.007	9.99327e-05	DMD	EPHB1	Endothelial
9.44835e-10	0.293892	0.033	0.008	3.45819e-05	DMD	AC105052.4	Endothelial
9.57118e-19	0.293789	0.145	0.069	3.50315e-14	DMD	ARHGAP17	Endothelial
2.31313e-09	0.293664	0.033	0.009	8.46629e-05	DMD	AL136171.2	Endothelial
9.62678e-12	0.293067	0.065	0.026	3.5235e-07	DMD	PTCD3	Endothelial
7.341e-12	0.292297	0.068	0.028	2.68688e-07	DMD	ST3GAL6	Endothelial
5.46817e-07	0.292214	0.034	0.014	0.020014	DMD	AC104041.1	Endothelial
3.2748e-09	0.292174	0.05	0.021	0.000119861	DMD	ILF3	Endothelial
1.82358e-28	0.292123	0.563	0.375	6.6745e-24	DMD	PECAM1	Endothelial
2.75266e-20	0.291733	0.429	0.291	1.0075e-15	DMD	LINC00486	Endothelial
9.12417e-13	0.291682	0.08	0.035	3.33954e-08	DMD	TPP2	Endothelial
2.28118e-08	0.291665	0.037	0.014	0.000834935	DMD	AC008514.1	Endothelial
1.74813e-12	0.291593	0.109	0.057	6.39832e-08	DMD	EIF1B-AS1	Endothelial
1.16751e-08	0.291123	0.05	0.022	0.000427322	DMD	TTC7A	Endothelial
1.74445e-10	0.291043	0.043	0.014	6.38486e-06	DMD	ARHGEF11	Endothelial
2.29139e-11	0.290944	0.11	0.06	8.38673e-07	DMD	PDCD4	Endothelial
2.38168e-19	0.29036	0.18	0.094	8.7172e-15	DMD	ZMYM2	Endothelial
3.51498e-11	0.290289	0.048	0.016	1.28652e-06	DMD	TMCC3	Endothelial
7.67929e-20	0.289924	0.175	0.088	2.8107e-15	DMD	ZNF280D	Endothelial
8.87164e-08	0.289607	0.032	0.011	0.00324711	DMD	CACNA1C	Endothelial
8.2173e-17	0.289551	0.167	0.09	3.00761e-12	DMD	GRK5	Endothelial
5.46106e-23	0.289308	0.227	0.119	1.9988e-18	DMD	BABAM2	Endothelial
1.73464e-14	0.289239	0.12	0.06	6.34895e-10	DMD	CHD7	Endothelial
2.35e-10	0.289102	0.028	0.005	8.60123e-06	DMD	ZNF385D-AS1	Endothelial
2.96673e-11	0.288673	0.073	0.033	1.08585e-06	DMD	AP002812.2	Endothelial
1.27941e-13	0.288453	0.093	0.042	4.68276e-09	DMD	DDX10	Endothelial
1.83742e-09	0.287833	0.021	0.002	6.72514e-05	DMD	AC009315.1	Endothelial
6.81092e-09	0.287833	0.047	0.019	0.000249286	DMD	AC078881.1	Endothelial
1.84405e-14	0.287273	0.102	0.047	6.74942e-10	DMD	LRIG1	Endothelial
3.33164e-10	0.287269	0.058	0.025	1.21941e-05	DMD	AP001831.1	Endothelial
5.73148e-08	0.286839	0.049	0.022	0.00209778	DMD	AL356124.1	Endothelial
1.06924e-12	0.286682	0.105	0.053	3.91354e-08	DMD	PARD3	Endothelial
4.21972e-09	0.286465	0.021	0.002	0.000154446	DMD	SNAP25	Endothelial
2.2155e-08	0.286066	0.05	0.022	0.000810897	DMD	SLC7A6	Endothelial
1.71798e-14	0.285895	0.08	0.032	6.28796e-10	DMD	LRRC1	Endothelial
5.20557e-10	0.285845	0.057	0.024	1.90529e-05	DMD	TMEM255B	Endothelial
1.75799e-11	0.285808	0.065	0.027	6.43443e-07	DMD	AC074033.1	Endothelial
7.80569e-12	0.285699	0.059	0.022	2.85696e-07	DMD	NAA25	Endothelial
3.61141e-11	0.285399	0.067	0.029	1.32181e-06	DMD	LPCAT4	Endothelial
3.84755e-08	0.285217	0.032	0.01	0.00140824	DMD	TNS3	Endothelial
1.2048e-16	0.285065	0.142	0.072	4.40967e-12	DMD	MAP3K1	Endothelial
1.15795e-08	0.284515	0.021	0.003	0.00042382	DMD	CPNE5	Endothelial
3.07429e-12	0.284331	0.055	0.019	1.12522e-07	DMD	CCL14	Endothelial
2.28036e-13	0.284149	0.105	0.051	8.34636e-09	DMD	RIF1	Endothelial
1.17625e-10	0.284138	0.044	0.014	4.30518e-06	DMD	CCDC191	Endothelial
1.3554e-14	0.28386	0.127	0.065	4.9609e-10	DMD	MEF2C-AS1	Endothelial
2.72448e-11	0.283831	0.053	0.019	9.97188e-07	DMD	ITGA2	Endothelial
5.49774e-14	0.283795	0.093	0.042	2.01223e-09	DMD	RGS12	Endothelial
2.7591e-15	0.283587	0.127	0.064	1.00986e-10	DMD	UBE2E1	Endothelial
1.67474e-12	0.283581	0.082	0.037	6.12973e-08	DMD	UIMC1	Endothelial
6.07977e-07	0.283131	0.032	0.012	0.0222526	DMD	EFCC1	Endothelial
5.08592e-18	0.282965	0.156	0.079	1.8615e-13	DMD	SPTLC2	Endothelial
1.31012e-16	0.282618	0.132	0.064	4.79518e-12	DMD	PDE9A	Endothelial
7.08335e-08	0.282534	0.035	0.013	0.00259258	DMD	LRP2BP	Endothelial
2.41532e-10	0.282332	0.037	0.01	8.8403e-06	DMD	KIF9-AS1	Endothelial
1.09731e-10	0.282294	0.055	0.022	4.01625e-06	DMD	MVP	Endothelial
1.5097e-09	0.282284	0.021	0.002	5.52566e-05	DMD	ABCA10	Endothelial
1.28001e-11	0.281971	0.066	0.027	4.68498e-07	DMD	IARS	Endothelial
8.61301e-11	0.281948	0.052	0.019	3.15245e-06	DMD	CEP135	Endothelial
7.81723e-14	0.281908	0.08	0.033	2.86119e-09	DMD	ZRANB3	Endothelial
1.46393e-08	0.281642	0.032	0.009	0.000535814	DMD	NNMT	Endothelial
2.03482e-15	0.281179	0.093	0.039	7.44766e-11	DMD	ZNF608	Endothelial
1.91886e-22	0.281124	0.323	0.194	7.02323e-18	DMD	MAST4	Endothelial
5.52687e-14	0.280908	0.062	0.021	2.02289e-09	DMD	YPEL2	Endothelial
1.65824e-07	0.280886	0.029	0.009	0.00606934	DMD	COL21A1	Endothelial
8.93567e-21	0.280691	0.238	0.134	3.27055e-16	DMD	EXOC6	Endothelial
2.21417e-18	0.280672	0.117	0.051	8.10407e-14	DMD	TCHP	Endothelial
1.27644e-09	0.280664	0.033	0.009	4.67189e-05	DMD	ZNF551	Endothelial
4.20369e-12	0.280636	0.079	0.036	1.53859e-07	DMD	DCAF8	Endothelial
2.41657e-09	0.280377	0.076	0.039	8.84488e-05	DMD	RPS27	Endothelial
1.62808e-09	0.279936	0.026	0.005	5.95893e-05	DMD	CDON	Endothelial
4.90827e-12	0.279575	0.1	0.051	1.79648e-07	DMD	POSTN	Endothelial
1.53551e-08	0.279441	0.027	0.007	0.000562013	DMD	GDPD5	Endothelial
2.62901e-07	0.279256	0.04	0.017	0.00962244	DMD	IGBP1	Endothelial
6.92845e-11	0.278843	0.131	0.078	2.53588e-06	DMD	ARHGAP18	Endothelial
5.45004e-17	0.278786	0.1	0.041	1.99477e-12	DMD	SLFN5	Endothelial
8.62859e-09	0.2782	0.033	0.01	0.000315815	DMD	TCF4-AS2	Endothelial
4.58477e-10	0.277901	0.051	0.02	1.67807e-05	DMD	PRKAR1B	Endothelial
6.77982e-12	0.277886	0.07	0.029	2.48148e-07	DMD	AL109824.1	Endothelial
7.78221e-11	0.277793	0.025	0.003	2.84837e-06	DMD	AC011853.2	Endothelial
2.9954e-11	0.277359	0.055	0.021	1.09635e-06	DMD	RALB	Endothelial
1.26557e-15	0.277339	0.126	0.062	4.6321e-11	DMD	MYBPC1	Endothelial
4.16867e-11	0.276682	0.057	0.022	1.52577e-06	DMD	WLS	Endothelial
1.6007e-12	0.276574	0.071	0.029	5.85871e-08	DMD	C11orf49	Endothelial
1.07588e-08	0.276527	0.066	0.033	0.000393783	DMD	NHSL1	Endothelial
1.35405e-11	0.276425	0.046	0.014	4.95597e-07	DMD	LINC00630	Endothelial
4.3073e-21	0.276053	0.233	0.13	1.57652e-16	DMD	XPR1	Endothelial
7.7455e-10	0.27574	0.045	0.016	2.83493e-05	DMD	AC004540.1	Endothelial
4.79932e-20	0.275557	0.313	0.196	1.7566e-15	DMD	ENTPD1-AS1	Endothelial
1.21328e-10	0.275247	0.051	0.019	4.44074e-06	DMD	PPP1R10	Endothelial
5.4981e-10	0.274965	0.043	0.015	2.01236e-05	DMD	AC004551.1	Endothelial
1.04658e-08	0.274566	0.033	0.01	0.00038306	DMD	MARCH1	Endothelial
6.34226e-13	0.273648	0.137	0.076	2.32133e-08	DMD	PDE5A	Endothelial
6.1322e-10	0.272981	0.043	0.015	2.24444e-05	DMD	ELP3	Endothelial
3.38738e-10	0.27266	0.046	0.016	1.23981e-05	DMD	ELK4	Endothelial
6.88343e-08	0.271831	0.03	0.009	0.0025194	DMD	ACTN2	Endothelial
4.69358e-09	0.271519	0.03	0.008	0.00017179	DMD	CSRP3	Endothelial
5.20744e-09	0.271327	0.042	0.015	0.000190597	DMD	ALG13-AS1	Endothelial
7.15836e-10	0.270671	0.05	0.02	2.62003e-05	DMD	SNX2	Endothelial
2.98501e-08	0.269987	0.034	0.012	0.00109254	DMD	AL360178.1	Endothelial
1.24021e-08	0.269784	0.033	0.01	0.000453929	DMD	RGL1	Endothelial
1.89064e-08	0.26973	0.03	0.009	0.000691993	DMD	COL4A5	Endothelial
7.98592e-09	0.269081	0.015	0	0.000292293	DMD	CYSLTR2	Endothelial
5.08804e-17	0.26903	0.103	0.043	1.86227e-12	DMD	AUH	Endothelial
1.40834e-07	0.268894	0.075	0.043	0.00515466	DMD	ST5	Endothelial
2.65971e-11	0.268331	0.12	0.067	9.73479e-07	DMD	NAV2	Endothelial
8.82408e-08	0.267917	0.017	0.002	0.0032297	DMD	ADAMTS17	Endothelial
9.00264e-14	0.267866	0.107	0.052	3.29506e-09	DMD	USP45	Endothelial
1.03895e-09	0.267804	0.026	0.005	3.80265e-05	DMD	GPRC5D-AS1	Endothelial
2.37557e-16	0.267769	0.17	0.094	8.69481e-12	DMD	RNF111	Endothelial
2.90807e-14	0.267631	0.106	0.051	1.06438e-09	DMD	DGLUCY	Endothelial
8.95796e-10	0.267591	0.047	0.017	3.2787e-05	DMD	DOC2B	Endothelial
8.82366e-08	0.267518	0.03	0.01	0.00322955	DMD	RBFOX1	Endothelial
2.80149e-08	0.267494	0.047	0.021	0.00102537	DMD	CHKA	Endothelial
1.05441e-08	0.26648	0.025	0.005	0.000385926	DMD	SHANK2	Endothelial
7.5927e-10	0.266411	0.019	0.001	2.77901e-05	DMD	BICRA-AS1	Endothelial
6.84926e-08	0.266239	0.038	0.015	0.0025069	DMD	AC022872.1	Endothelial
2.84927e-17	0.266161	0.156	0.081	1.04286e-12	DMD	RPL41	Endothelial
2.45625e-10	0.266148	0.055	0.022	8.99013e-06	DMD	NUDCD3	Endothelial
5.75688e-13	0.265486	0.071	0.028	2.10708e-08	DMD	RASSF9	Endothelial
3.08606e-23	0.265469	0.441	0.285	1.12953e-18	DMD	DLEU2	Endothelial
7.82749e-14	0.264968	0.145	0.081	2.86494e-09	DMD	MAGI2	Endothelial
5.87529e-07	0.264703	0.037	0.015	0.0215042	DMD	NOVA1	Endothelial
9.70248e-09	0.264691	0.066	0.033	0.00035512	DMD	PIEZO1	Endothelial
3.85622e-13	0.264556	0.117	0.061	1.41141e-08	DMD	SLF1	Endothelial
7.32861e-12	0.264462	0.099	0.051	2.68235e-07	DMD	SGCE	Endothelial
6.35417e-12	0.263865	0.097	0.049	2.32569e-07	DMD	SPC25	Endothelial
1.34873e-10	0.26385	0.028	0.005	4.9365e-06	DMD	LINC00113	Endothelial
3.11738e-08	0.263757	0.031	0.009	0.00114099	DMD	CORO2A	Endothelial
8.279e-22	0.263531	0.287	0.168	3.0302e-17	DMD	SEMA6A	Endothelial
3.01514e-11	0.26352	0.079	0.037	1.10357e-06	DMD	BACH1	Endothelial
7.5644e-11	0.263519	0.065	0.028	2.76865e-06	DMD	MYO19	Endothelial
6.705e-12	0.263501	0.063	0.025	2.4541e-07	DMD	SLC25A26	Endothelial
1.8358e-12	0.263441	0.146	0.084	6.7192e-08	DMD	AC023424.3	Endothelial
2.28775e-15	0.263422	0.112	0.053	8.3734e-11	DMD	PAK2	Endothelial
5.77375e-13	0.263322	0.123	0.066	2.11325e-08	DMD	INSYN2A	Endothelial
6.65532e-12	0.263179	0.078	0.035	2.43591e-07	DMD	HOXD3	Endothelial
4.3049e-12	0.262678	0.057	0.02	1.57563e-07	DMD	FKTN	Endothelial
2.39897e-07	0.261685	0.024	0.007	0.00878048	DMD	NUCB1-AS1	Endothelial
3.95392e-11	0.261668	0.062	0.025	1.44717e-06	DMD	STRADA	Endothelial
1.1383e-09	0.261404	0.044	0.016	4.1663e-05	DMD	ARHGAP31-AS1	Endothelial
9.185e-11	0.260837	0.053	0.02	3.3618e-06	DMD	ZNF100	Endothelial
5.18234e-23	0.260724	0.413	0.264	1.89679e-18	DMD	DIAPH2	Endothelial
5.4192e-27	0.26011	0.618	0.425	1.98348e-22	DMD	ELMO1	Endothelial
1.34595e-14	0.259497	0.11	0.052	4.92632e-10	DMD	AC005670.3	Endothelial
7.7093e-16	0.25936	0.12	0.058	2.82168e-11	DMD	LINC01278	Endothelial
3.40525e-09	0.259145	0.04	0.014	0.000124636	DMD	ZFYVE28	Endothelial
5.33349e-12	0.259057	0.085	0.04	1.95211e-07	DMD	RORA-AS1	Endothelial
2.33191e-12	0.258987	0.097	0.048	8.53502e-08	DMD	STARD13-AS	Endothelial
1.4087e-11	0.258767	0.042	0.012	5.15597e-07	DMD	TRPM6	Endothelial
2.14418e-13	0.258748	0.085	0.037	7.84791e-09	DMD	USP9X	Endothelial
2.64376e-10	0.258512	0.056	0.023	9.67642e-06	DMD	ZMIZ2	Endothelial
9.18169e-11	0.25849	0.034	0.008	3.36059e-06	DMD	SPDYE1	Endothelial
6.74061e-11	0.258278	0.069	0.03	2.46713e-06	DMD	CC2D2A	Endothelial
7.72124e-23	0.257855	0.435	0.284	2.82605e-18	DMD	CSGALNACT1	Endothelial
2.52505e-11	0.256783	0.092	0.047	9.24194e-07	DMD	PRDM5	Endothelial
8.3267e-08	0.256726	0.021	0.004	0.00304765	DMD	AC090578.1	Endothelial
2.33423e-09	0.256702	0.056	0.025	8.54352e-05	DMD	LYN	Endothelial
4.8091e-08	0.256544	0.166	0.115	0.00176018	DMD	SULF1	Endothelial
7.44537e-18	0.256385	0.167	0.087	2.72508e-13	DMD	LUC7L2	Endothelial
9.23126e-07	0.256327	0.036	0.015	0.0337873	DMD	PROM1	Endothelial
2.26617e-09	0.256182	0.042	0.015	8.29442e-05	DMD	PREPL	Endothelial
2.14493e-23	0.256143	0.351	0.213	7.85064e-19	DMD	ZFAND3	Endothelial
5.99553e-11	0.256023	0.067	0.029	2.19443e-06	DMD	ECHDC1	Endothelial
2.22663e-08	0.255986	0.014	0	0.000814968	DMD	AP000829.1	Endothelial
6.49508e-10	0.255899	0.05	0.019	2.37726e-05	DMD	LGALS8	Endothelial
8.67433e-09	0.255879	0.044	0.017	0.000317489	DMD	PCMTD2	Endothelial
4.55984e-11	0.255871	0.167	0.105	1.66895e-06	DMD	ATP8A1	Endothelial
3.22484e-09	0.25581	0.044	0.016	0.000118032	DMD	AC073343.2	Endothelial
8.46988e-10	0.255576	0.053	0.022	3.10006e-05	DMD	SCARB1	Endothelial
3.20242e-15	0.25535	0.137	0.071	1.17212e-10	DMD	MGST2	Endothelial
3.00148e-10	0.255214	0.038	0.011	1.09857e-05	DMD	ARRDC3	Endothelial
5.32949e-13	0.255209	0.084	0.037	1.95064e-08	DMD	SSBP3	Endothelial
5.56067e-08	0.255207	0.017	0.001	0.00203526	DMD	NNAT	Endothelial
3.71139e-15	0.254795	0.153	0.083	1.35841e-10	DMD	ADGRL2	Endothelial
6.06344e-17	0.254784	0.129	0.061	2.21928e-12	DMD	GIPC2	Endothelial
6.37133e-10	0.254641	0.045	0.016	2.33197e-05	DMD	LRIG2	Endothelial
4.89218e-12	0.254359	0.056	0.02	1.79059e-07	DMD	AC025171.1	Endothelial
1.74969e-11	0.254124	0.061	0.024	6.40405e-07	DMD	AC068888.1	Endothelial
3.1982e-20	0.252879	0.249	0.143	1.17057e-15	DMD	RAD51B	Endothelial
4.8991e-09	0.252573	0.054	0.024	0.000179312	DMD	ZFP14	Endothelial
2.62252e-12	0.252518	0.081	0.037	9.5987e-08	DMD	KLHL2	Endothelial
4.10178e-13	0.252293	0.077	0.032	1.50129e-08	DMD	PIGL	Endothelial
8.53828e-10	0.252219	0.05	0.02	3.1251e-05	DMD	UBAP2L	Endothelial
1.84144e-08	0.252212	0.058	0.028	0.000673984	DMD	PPP1R9A	Endothelial
7.55147e-15	0.252162	0.122	0.061	2.76391e-10	DMD	PRRC2B	Endothelial
4.73857e-09	0.252089	0.035	0.011	0.000173437	DMD	AC003681.1	Endothelial
1.44216e-13	0.251984	0.112	0.056	5.27844e-09	DMD	AL022323.4	Endothelial
5.86254e-11	0.25164	0.052	0.019	2.14575e-06	DMD	AC015849.3	Endothelial
3.91704e-09	0.25082	0.047	0.019	0.000143368	DMD	FLOT2	Endothelial
7.5807e-12	0.250694	0.156	0.094	2.77461e-07	DMD	STARD4-AS1	Endothelial
4.49352e-08	0.250499	0.033	0.011	0.00164467	DMD	CFAP54	Endothelial
2.09837e-09	0.250455	0.04	0.014	7.68026e-05	DMD	AC093110.1	Endothelial
6.08066e-11	0.249911	0.09	0.046	2.22558e-06	DMD	DOP1A	Endothelial
6.86006e-09	0.249865	0.047	0.019	0.000251085	DMD	SP2-AS1	Endothelial
4.79943e-08	0.249821	0.021	0.004	0.00175664	DMD	AP001604.1	Endothelial
1.89298e-12	0.249721	0.066	0.026	6.92849e-08	DMD	NID1	Endothelial
1.5595e-15	0.249638	0.124	0.06	5.70791e-11	DMD	FZD6	Endothelial
4.23622e-09	0.249578	0.048	0.019	0.00015505	DMD	TTTY10	Endothelial
2.32324e-12	0.248728	0.103	0.052	8.50329e-08	DMD	XPO4	Endothelial
2.09379e-11	0.248583	0.093	0.047	7.66348e-07	DMD	FAM171A1	Endothelial
1.70829e-09	0.248245	0.037	0.011	6.25251e-05	DMD	AC090541.1	Endothelial
3.66971e-08	0.2482	0.023	0.005	0.00134315	DMD	TRAF7	Endothelial
4.60317e-11	0.248108	0.072	0.033	1.68481e-06	DMD	ABHD15-AS1	Endothelial
1.6459e-09	0.24792	0.055	0.023	6.02414e-05	DMD	TCP11L2	Endothelial
3.03887e-14	0.246922	0.133	0.07	1.11225e-09	DMD	CYTH1	Endothelial
9.54163e-23	0.246701	0.285	0.162	3.49233e-18	DMD	CNTNAP3B	Endothelial
1.02757e-19	0.246635	0.269	0.16	3.76099e-15	DMD	STK3	Endothelial
1.29528e-10	0.246384	0.084	0.043	4.74086e-06	DMD	SCARF1	Endothelial
6.9045e-08	0.245978	0.033	0.011	0.00252712	DMD	SYNE3	Endothelial
2.2702e-09	0.245277	0.059	0.027	8.30915e-05	DMD	ZNF326	Endothelial
7.37058e-21	0.245015	0.289	0.169	2.69771e-16	DMD	RBPMS	Endothelial
2.18885e-09	0.244133	0.028	0.006	8.01143e-05	DMD	AC011595.1	Endothelial
4.62401e-09	0.244127	0.045	0.017	0.000169244	DMD	DAPK1	Endothelial
2.46154e-10	0.24409	0.064	0.028	9.00949e-06	DMD	TMEM65	Endothelial
1.24424e-17	0.243941	0.13	0.061	4.55405e-13	DMD	PPA2	Endothelial
6.24843e-08	0.243928	0.022	0.005	0.00228699	DMD	AC108449.1	Endothelial
1.41284e-08	0.243755	0.026	0.006	0.000517114	DMD	AC068481.1	Endothelial
6.06507e-09	0.243676	0.04	0.014	0.000221988	DMD	WDR73	Endothelial
1.09781e-12	0.24327	0.088	0.041	4.0181e-08	DMD	FANCL	Endothelial
1.74842e-10	0.24323	0.088	0.045	6.39938e-06	DMD	SLK	Endothelial
5.65949e-20	0.243142	0.258	0.15	2.07143e-15	DMD	FGD5	Endothelial
9.70781e-09	0.242924	0.137	0.089	0.000355316	DMD	VEGFC	Endothelial
7.58158e-20	0.242888	0.212	0.116	2.77494e-15	DMD	IQGAP1	Endothelial
6.80395e-11	0.24283	0.067	0.029	2.49031e-06	DMD	GPSM2	Endothelial
1.27611e-10	0.242789	0.06	0.025	4.67069e-06	DMD	FGD6	Endothelial
1.31223e-08	0.242611	0.066	0.033	0.00048029	DMD	RAB27A	Endothelial
2.54877e-09	0.242415	0.06	0.027	9.32875e-05	DMD	RCOR1	Endothelial
2.27435e-07	0.241636	0.029	0.01	0.00832435	DMD	SCN11A	Endothelial
4.15863e-09	0.241542	0.016	0	0.00015221	DMD	NGB	Endothelial
8.44313e-15	0.241414	0.123	0.062	3.09027e-10	DMD	ZNF251	Endothelial
5.93179e-11	0.241388	0.079	0.038	2.1711e-06	DMD	NDUFS4	Endothelial
7.73885e-08	0.241259	0.062	0.032	0.0028325	DMD	HS2ST1	Endothelial
1.22811e-10	0.240856	0.032	0.007	4.49501e-06	DMD	AC136424.2	Endothelial
3.11719e-11	0.240701	0.07	0.031	1.14092e-06	DMD	SPATA1	Endothelial
3.40691e-15	0.24051	0.127	0.064	1.24696e-10	DMD	CMSS1	Endothelial
3.52423e-08	0.240296	0.039	0.015	0.0012899	DMD	SAP30L-AS1	Endothelial
7.74402e-12	0.240199	0.056	0.02	2.83439e-07	DMD	TMEM39A	Endothelial
1.63457e-10	0.239981	0.105	0.059	5.98269e-06	DMD	AC074032.1	Endothelial
3.84136e-07	0.23964	0.032	0.012	0.0140598	DMD	TNK2	Endothelial
7.82856e-08	0.239331	0.029	0.009	0.00286533	DMD	LDLRAD3	Endothelial
2.76488e-08	0.239326	0.032	0.01	0.00101197	DMD	NPHP1	Endothelial
2.33475e-07	0.239322	0.052	0.025	0.0085454	DMD	GABPA	Endothelial
4.11588e-12	0.239133	0.049	0.015	1.50645e-07	DMD	CADM3-AS1	Endothelial
2.47328e-13	0.239028	0.143	0.081	9.05245e-09	DMD	DPH6	Endothelial
2.25085e-08	0.238959	0.029	0.008	0.000823832	DMD	DLGAP4-AS1	Endothelial
8.33054e-07	0.238878	0.022	0.006	0.0304906	DMD	AL356804.1	Endothelial
9.30437e-08	0.238835	0.028	0.008	0.00340549	DMD	AC110491.2	Endothelial
3.9159e-09	0.238743	0.051	0.022	0.000143326	DMD	POT1	Endothelial
1.18179e-09	0.238443	0.054	0.022	4.32545e-05	DMD	SLC23A2	Endothelial
1.64608e-07	0.2384	0.026	0.007	0.00602483	DMD	MGAT3	Endothelial
7.37228e-16	0.237941	0.129	0.064	2.69833e-11	DMD	POLR2J3	Endothelial
5.68364e-12	0.23765	0.089	0.043	2.08027e-07	DMD	AC104365.1	Endothelial
1.85974e-09	0.237271	0.037	0.012	6.80684e-05	DMD	DIXDC1	Endothelial
1.65348e-07	0.237255	0.023	0.006	0.00605189	DMD	AC008534.1	Endothelial
7.69573e-22	0.236977	0.443	0.286	2.81672e-17	DMD	ERG	Endothelial
8.73803e-14	0.236936	0.091	0.041	3.19821e-09	DMD	FAM222B	Endothelial
5.7133e-29	0.236798	0.547	0.354	2.09112e-24	DMD	FOXP1	Endothelial
7.78622e-10	0.236774	0.067	0.031	2.84983e-05	DMD	SOX6	Endothelial
1.88943e-09	0.236549	0.059	0.027	6.91552e-05	DMD	ANAPC10	Endothelial
2.99657e-07	0.236344	0.024	0.007	0.0109677	DMD	TMEM178A	Endothelial
6.21501e-08	0.236286	0.022	0.005	0.00227476	DMD	SNHG1	Endothelial
5.99026e-22	0.235782	0.277	0.159	2.19249e-17	DMD	RBFOX2	Endothelial
1.87029e-12	0.235718	0.135	0.076	6.84543e-08	DMD	MSRA	Endothelial
3.78783e-09	0.235666	0.082	0.044	0.000138638	DMD	AC012613.1	Endothelial
6.39669e-09	0.23566	0.039	0.014	0.000234125	DMD	AL359094.1	Endothelial
7.5504e-07	0.235554	0.05	0.025	0.0276352	DMD	RPS18	Endothelial
2.14109e-07	0.235262	0.034	0.013	0.00783662	DMD	SLC4A7	Endothelial
1.05481e-06	0.235168	0.032	0.013	0.0386072	DMD	GABRP	Endothelial
3.23522e-10	0.235087	0.076	0.037	1.18412e-05	DMD	ZNF586	Endothelial
3.42005e-12	0.235055	0.091	0.044	1.25177e-07	DMD	ACIN1	Endothelial
5.0761e-09	0.235024	0.084	0.045	0.00018579	DMD	PPP2R3A	Endothelial
1.09516e-10	0.234994	0.075	0.036	4.00841e-06	DMD	MTMR2	Endothelial
9.10688e-12	0.234834	0.103	0.054	3.33321e-07	DMD	NDRG1	Endothelial
1.11391e-08	0.234766	0.079	0.043	0.000407702	DMD	TNFRSF14	Endothelial
1.20436e-14	0.234747	0.153	0.084	4.40808e-10	DMD	IKBKB	Endothelial
3.64383e-11	0.234446	0.1	0.053	1.33368e-06	DMD	EHD4	Endothelial
5.15699e-14	0.234272	0.106	0.051	1.88751e-09	DMD	TANK	Endothelial
4.85217e-08	0.234225	0.052	0.024	0.00177594	DMD	SLC6A6	Endothelial
1.06864e-08	0.234212	0.046	0.019	0.000391133	DMD	SLC7A6OS	Endothelial
1.56535e-08	0.233985	0.045	0.018	0.000572933	DMD	LPCAT3	Endothelial
2.63015e-07	0.233953	0.018	0.003	0.00962661	DMD	BTBD17	Endothelial
1.78148e-07	0.233891	0.028	0.008	0.00652041	DMD	ITGB3	Endothelial
2.90592e-09	0.233831	0.043	0.015	0.00010636	DMD	ZSCAN30	Endothelial
8.76419e-08	0.233766	0.019	0.003	0.00320778	DMD	IPCEF1	Endothelial
1.0988e-07	0.233252	0.037	0.014	0.00402172	DMD	FSIP2-AS1	Endothelial
3.17688e-22	0.232974	0.416	0.268	1.16277e-17	DMD	LRRFIP1	Endothelial
1.36016e-18	0.232805	0.164	0.083	4.97832e-14	DMD	CHD2	Endothelial
3.54332e-08	0.232747	0.018	0.002	0.00129689	DMD	PP2D1	Endothelial
1.03351e-13	0.23263	0.123	0.064	3.78276e-09	DMD	SUCLG2	Endothelial
1.77898e-07	0.232451	0.023	0.006	0.00651125	DMD	AL109946.1	Endothelial
2.93165e-16	0.232376	0.134	0.066	1.07301e-11	DMD	SCFD2	Endothelial
9.96539e-09	0.232179	0.042	0.016	0.000364743	DMD	ZNF680	Endothelial
2.8797e-07	0.231563	0.036	0.015	0.01054	DMD	CPNE1	Endothelial
7.16359e-08	0.231563	0.04	0.016	0.00262194	DMD	MAP3K12	Endothelial
2.40814e-18	0.2314	0.132	0.061	8.81403e-14	DMD	XRRA1	Endothelial
7.80698e-12	0.231194	0.089	0.043	2.85743e-07	DMD	C2CD5	Endothelial
1.90998e-12	0.230799	0.088	0.041	6.99071e-08	DMD	AC009690.2	Endothelial
1.01845e-06	0.230616	0.017	0.003	0.0372764	DMD	TIMP1	Endothelial
1.07533e-24	0.230579	0.258	0.137	3.93583e-20	DMD	COMMD10	Endothelial
1.24982e-06	0.230494	0.02	0.005	0.0457447	DMD	VCAM1	Endothelial
3.32198e-07	0.230474	0.031	0.011	0.0121588	DMD	AC004889.1	Endothelial
3.69457e-08	0.230248	0.032	0.01	0.00135225	DMD	PTCD1	Endothelial
1.32341e-11	0.23016	0.068	0.029	4.8438e-07	DMD	BRD4	Endothelial
3.74087e-14	0.230051	0.121	0.061	1.3692e-09	DMD	TTC3	Endothelial
4.33443e-07	0.229958	0.029	0.01	0.0158644	DMD	ZNF273	Endothelial
5.45651e-08	0.229631	0.032	0.01	0.00199714	DMD	AK2	Endothelial
4.16134e-14	0.229454	0.193	0.118	1.52309e-09	DMD	FAM155A	Endothelial
7.41121e-09	0.229067	0.056	0.026	0.000271258	DMD	AC009554.1	Endothelial
1.16999e-06	0.228751	0.024	0.007	0.0428226	DMD	PXN-AS1	Endothelial
2.49208e-08	0.228555	0.058	0.028	0.000912125	DMD	SMAD3	Endothelial
2.73408e-07	0.228277	0.032	0.012	0.010007	DMD	PIGB	Endothelial
1.22604e-06	0.228246	0.026	0.009	0.0448743	DMD	DAG1	Endothelial
1.82087e-12	0.227951	0.102	0.051	6.66458e-08	DMD	YEATS2	Endothelial
3.06376e-11	0.227706	0.072	0.032	1.12137e-06	DMD	ZNF544	Endothelial
4.78262e-08	0.22768	0.048	0.021	0.00175049	DMD	P3H2	Endothelial
8.41042e-26	0.227616	0.325	0.185	3.0783e-21	DMD	TNRC6B	Endothelial
3.14594e-11	0.227166	0.079	0.037	1.15145e-06	DMD	BTAF1	Endothelial
1.12428e-07	0.227117	0.025	0.007	0.00411498	DMD	EGLN3	Endothelial
2.23952e-12	0.227042	0.144	0.083	8.19687e-08	DMD	VPS13A	Endothelial
1.70554e-08	0.227012	0.039	0.014	0.000624245	DMD	QTRT2	Endothelial
2.02217e-08	0.226766	0.062	0.031	0.000740134	DMD	GAB3	Endothelial
5.50059e-08	0.226656	0.04	0.016	0.00201327	DMD	ABCE1	Endothelial
1.83667e-20	0.226572	0.286	0.171	6.7224e-16	DMD	CRIM1	Endothelial
7.8895e-07	0.226493	0.033	0.013	0.0288764	DMD	F13A1	Endothelial
9.06459e-13	0.226433	0.131	0.072	3.31773e-08	DMD	SPATA5	Endothelial
9.25722e-13	0.226098	0.099	0.048	3.38824e-08	DMD	SESN3	Endothelial
2.78496e-09	0.226096	0.049	0.02	0.000101932	DMD	ACSS2	Endothelial
1.03514e-07	0.226068	0.053	0.025	0.00378871	DMD	SHC1	Endothelial
7.40833e-08	0.225926	0.034	0.012	0.00271152	DMD	AL031768.2	Endothelial
2.61955e-15	0.225897	0.142	0.074	9.58781e-11	DMD	TRIM25	Endothelial
4.4268e-16	0.225726	0.197	0.114	1.62025e-11	DMD	PRSS23	Endothelial
1.6682e-14	0.225609	0.121	0.06	6.10579e-10	DMD	COA1	Endothelial
6.1524e-09	0.225418	0.047	0.019	0.000225184	DMD	IVNS1ABP	Endothelial
1.18461e-06	0.225279	0.036	0.015	0.0433581	DMD	RAI1	Endothelial
1.30692e-11	0.225264	0.108	0.058	4.78345e-07	DMD	YBX3	Endothelial
9.01648e-09	0.225185	0.064	0.031	0.000330012	DMD	SIPA1L2	Endothelial
3.29048e-15	0.224998	0.105	0.048	1.20435e-10	DMD	EFCAB13	Endothelial
2.46243e-11	0.224982	0.099	0.051	9.01274e-07	DMD	TAF1	Endothelial
6.36986e-08	0.224816	0.066	0.035	0.00233143	DMD	MTCH1	Endothelial
1.32347e-08	0.224603	0.041	0.015	0.000484402	DMD	AC104316.1	Endothelial
1.19511e-09	0.224427	0.064	0.029	4.37422e-05	DMD	WDR27	Endothelial
7.3709e-08	0.224408	0.045	0.019	0.00269782	DMD	ADSS	Endothelial
5.16199e-07	0.223878	0.024	0.007	0.0188934	DMD	PHC1	Endothelial
3.51253e-09	0.223786	0.076	0.04	0.000128562	DMD	SYNC	Endothelial
3.41064e-18	0.22349	0.276	0.17	1.24833e-13	DMD	RPS6KA2	Endothelial
4.57924e-21	0.223123	0.499	0.339	1.67605e-16	DMD	FRYL	Endothelial
2.14189e-10	0.222959	0.092	0.048	7.83953e-06	DMD	ETNK1	Endothelial
4.93792e-08	0.222904	0.06	0.03	0.00180733	DMD	ZNHIT6	Endothelial
1.38798e-09	0.222793	0.094	0.051	5.08016e-05	DMD	EPB41	Endothelial
1.51064e-08	0.222744	0.035	0.012	0.00055291	DMD	AC073475.1	Endothelial
6.0246e-07	0.22249	0.029	0.01	0.0220506	DMD	PLXNB2	Endothelial
5.33692e-08	0.222474	0.03	0.009	0.00195337	DMD	UNKL	Endothelial
2.53871e-09	0.222223	0.065	0.031	9.29192e-05	DMD	NUDCD1	Endothelial
1.04746e-10	0.222145	0.09	0.046	3.8338e-06	DMD	TMLHE	Endothelial
2.89072e-07	0.22203	0.031	0.011	0.0105803	DMD	TMA16	Endothelial
6.15241e-07	0.221868	0.042	0.019	0.0225184	DMD	CCDC150	Endothelial
1.01377e-07	0.221812	0.03	0.009	0.00371051	DMD	LANCL1-AS1	Endothelial
1.2125e-07	0.221631	0.048	0.022	0.00443788	DMD	RPL21	Endothelial
2.26026e-07	0.221484	0.04	0.017	0.00827279	DMD	ZC3H8	Endothelial
2.22746e-07	0.221297	0.019	0.003	0.00815272	DMD	SLC35E2A	Endothelial
8.24805e-10	0.221154	0.076	0.038	3.01887e-05	DMD	LEPR	Endothelial
4.28818e-13	0.220933	0.099	0.048	1.56952e-08	DMD	ATG10	Endothelial
9.18024e-20	0.220927	0.338	0.211	3.36006e-15	DMD	CEP112	Endothelial
1.46656e-08	0.220897	0.054	0.024	0.000536776	DMD	EMC2	Endothelial
4.55529e-09	0.220814	0.053	0.023	0.000166728	DMD	CCDC171	Endothelial
6.94298e-14	0.220552	0.204	0.125	2.5412e-09	DMD	PCNX1	Endothelial
5.09915e-07	0.219903	0.034	0.013	0.0186634	DMD	SPAG16	Endothelial
1.36623e-11	0.219879	0.128	0.073	5.00055e-07	DMD	DYNC1I2	Endothelial
1.68538e-09	0.219794	0.076	0.038	6.16867e-05	DMD	AP1G1	Endothelial
1.06335e-09	0.219704	0.063	0.029	3.89197e-05	DMD	MTX2	Endothelial
1.05999e-07	0.219674	0.03	0.01	0.00387965	DMD	COX7A2L	Endothelial
2.89247e-07	0.219649	0.033	0.012	0.0105867	DMD	C6orf141	Endothelial
2.08953e-18	0.219542	0.151	0.074	7.6479e-14	DMD	PCMTD1	Endothelial
4.75839e-07	0.219287	0.024	0.007	0.0174162	DMD	SEPSECS	Endothelial
8.25931e-09	0.219169	0.071	0.037	0.000302299	DMD	SERP1	Endothelial
2.06143e-12	0.218965	0.103	0.052	7.54503e-08	DMD	ZNF532	Endothelial
5.62507e-11	0.218867	0.06	0.024	2.05883e-06	DMD	CEP95	Endothelial
5.68682e-08	0.218827	0.044	0.019	0.00208143	DMD	HCG18	Endothelial
4.41212e-13	0.218769	0.105	0.052	1.61488e-08	DMD	NHSL2	Endothelial
8.86691e-11	0.21818	0.1	0.053	3.24538e-06	DMD	CAMK1D	Endothelial
7.16937e-15	0.218022	0.153	0.083	2.62406e-10	DMD	FUS	Endothelial
2.5827e-09	0.217963	0.065	0.031	9.45293e-05	DMD	NUFIP2	Endothelial
1.01833e-09	0.217867	0.052	0.021	3.7272e-05	DMD	IPO11	Endothelial
2.69378e-09	0.217792	0.06	0.028	9.85949e-05	DMD	SAMHD1	Endothelial
1.20927e-18	0.217661	0.23	0.133	4.42605e-14	DMD	HERC4	Endothelial
1.88214e-09	0.217413	0.085	0.045	6.88883e-05	DMD	AP001442.1	Endothelial
6.70723e-19	0.21732	0.371	0.238	2.45491e-14	DMD	DOCK1	Endothelial
9.29595e-11	0.216867	0.073	0.034	3.40241e-06	DMD	SLIRP	Endothelial
1.04698e-08	0.2168	0.04	0.015	0.000383205	DMD	CLEC2B	Endothelial
2.625e-10	0.216555	0.069	0.032	9.60776e-06	DMD	LRIG3	Endothelial
6.86341e-12	0.216333	0.095	0.047	2.51208e-07	DMD	HDAC4	Endothelial
1.00329e-12	0.216169	0.108	0.055	3.67213e-08	DMD	ZNF565	Endothelial
2.80868e-09	0.216157	0.067	0.033	0.0001028	DMD	WARS2-AS1	Endothelial
1.05658e-14	0.216046	0.146	0.078	3.8672e-10	DMD	ZNF83	Endothelial
8.3839e-09	0.215441	0.048	0.02	0.000306859	DMD	ZNF789	Endothelial
2.10955e-10	0.215006	0.08	0.039	7.72117e-06	DMD	MTM1	Endothelial
3.00183e-10	0.214894	0.094	0.05	1.0987e-05	DMD	UBA6	Endothelial
5.79836e-07	0.214627	0.025	0.007	0.0212226	DMD	LINC01572	Endothelial
3.45193e-11	0.214543	0.078	0.037	1.26344e-06	DMD	ATP2B1	Endothelial
6.22691e-08	0.21445	0.038	0.015	0.00227911	DMD	TSEN2	Endothelial
7.47051e-07	0.21441	0.025	0.007	0.0273428	DMD	RHOU	Endothelial
1.98069e-23	0.214354	0.267	0.146	7.24951e-19	DMD	ZNF638	Endothelial
2.97785e-07	0.214344	0.022	0.006	0.0108992	DMD	ZNF596	Endothelial
9.95188e-07	0.213962	0.031	0.012	0.0364249	DMD	PIGX	Endothelial
1.31621e-18	0.213914	0.257	0.152	4.81745e-14	DMD	RFX3	Endothelial
1.05749e-07	0.21335	0.035	0.013	0.00387052	DMD	GDAP1	Endothelial
1.62455e-08	0.213236	0.052	0.023	0.000594601	DMD	BRD2	Endothelial
3.37873e-07	0.213228	0.02	0.004	0.0123665	DMD	AC005856.1	Endothelial
9.43401e-07	0.21318	0.023	0.007	0.0345294	DMD	AF107885.2	Endothelial
9.13933e-08	0.212829	0.043	0.018	0.00334509	DMD	TSHZ1	Endothelial
3.51476e-07	0.212575	0.031	0.011	0.0128644	DMD	AC048341.1	Endothelial
3.3126e-07	0.212409	0.022	0.006	0.0121245	DMD	EGOT	Endothelial
1.21344e-07	0.212266	0.037	0.015	0.00444131	DMD	CRHBP	Endothelial
3.66592e-10	0.212069	0.09	0.048	1.34176e-05	DMD	ZNF91	Endothelial
7.07688e-07	0.212029	0.04	0.018	0.0259021	DMD	GLE1	Endothelial
8.13968e-07	0.211947	0.031	0.012	0.029792	DMD	TMEM220	Endothelial
7.24316e-23	0.211884	0.221	0.115	2.65107e-18	DMD	LINC01515	Endothelial
9.19138e-13	0.211813	0.112	0.058	3.36414e-08	DMD	MAP3K2	Endothelial
2.57925e-07	0.211645	0.026	0.008	0.00944031	DMD	AP002498.1	Endothelial
5.86675e-11	0.211293	0.09	0.045	2.14729e-06	DMD	PHTF2	Endothelial
6.97038e-08	0.211061	0.021	0.004	0.00255123	DMD	KNTC1	Endothelial
3.53648e-12	0.21099	0.1	0.05	1.29439e-07	DMD	TYW1	Endothelial
9.1434e-10	0.210734	0.047	0.017	3.34658e-05	DMD	DLD	Endothelial
4.95355e-07	0.210684	0.018	0.003	0.0181305	DMD	SLFN12L	Endothelial
8.19031e-09	0.210615	0.047	0.019	0.000299774	DMD	TRANK1	Endothelial
1.38566e-12	0.210554	0.113	0.059	5.07167e-08	DMD	SP110	Endothelial
1.40166e-09	0.210495	0.056	0.024	5.13021e-05	DMD	SETDB1	Endothelial
9.2148e-09	0.210186	0.058	0.027	0.000337271	DMD	TCAIM	Endothelial
1.29207e-06	0.210182	0.075	0.045	0.0472912	DMD	COL18A1	Endothelial
4.85291e-07	0.210094	0.036	0.015	0.0177621	DMD	TTI2	Endothelial
8.69478e-20	0.209933	0.301	0.182	3.18238e-15	DMD	MAML3	Endothelial
6.36273e-16	0.20986	0.174	0.096	2.32882e-11	DMD	SETX	Endothelial
1.78663e-10	0.209842	0.064	0.028	6.53924e-06	DMD	ORC3	Endothelial
6.86241e-07	0.209764	0.023	0.007	0.0251171	DMD	AP005203.1	Endothelial
1.19303e-07	0.209683	0.043	0.019	0.00436662	DMD	HDAC1	Endothelial
1.76951e-08	0.209598	0.046	0.019	0.000647658	DMD	ZNF345	Endothelial
2.21398e-07	0.208844	0.018	0.003	0.0081034	DMD	AL049646.1	Endothelial
1.45611e-07	0.208738	0.017	0.002	0.0053295	DMD	RNF32	Endothelial
3.47312e-07	0.208699	0.038	0.016	0.012712	DMD	CASC3	Endothelial
2.69149e-12	0.208616	0.124	0.068	9.85111e-08	DMD	AC118549.1	Endothelial
2.23129e-11	0.208379	0.097	0.05	8.16674e-07	DMD	FBXO34	Endothelial
1.48184e-08	0.20825	0.051	0.022	0.000542367	DMD	ZNF493	Endothelial
5.6843e-08	0.208245	0.053	0.025	0.00208051	DMD	RELL1	Endothelial
3.22818e-23	0.208082	0.396	0.247	1.18155e-18	DMD	DDX17	Endothelial
9.47237e-17	0.207617	0.232	0.138	3.46698e-12	DMD	CHN1	Endothelial
1.32264e-06	0.207602	0.03	0.011	0.0484099	DMD	AC009505.1	Endothelial
4.96332e-14	0.20758	0.132	0.07	1.81662e-09	DMD	HNRNPU	Endothelial
7.49591e-07	0.207467	0.019	0.004	0.0274358	DMD	CELSR1	Endothelial
1.03377e-07	0.207226	0.018	0.002	0.0037837	DMD	ZFY-AS1	Endothelial
4.15727e-07	0.207133	0.053	0.027	0.015216	DMD	SYCP2L	Endothelial
6.74972e-08	0.207091	0.057	0.028	0.00247046	DMD	ATG14	Endothelial
1.59308e-07	0.206727	0.058	0.029	0.00583085	DMD	UCK2	Endothelial
5.0659e-08	0.206651	0.028	0.008	0.00185417	DMD	NOC3L	Endothelial
4.35088e-07	0.20641	0.057	0.029	0.0159246	DMD	SEMA6C	Endothelial
3.36577e-07	0.206196	0.017	0.002	0.0123191	DMD	COL5A1	Endothelial
4.18799e-09	0.206183	0.08	0.042	0.000153285	DMD	IREB2	Endothelial
1.16266e-08	0.206086	0.06	0.029	0.000425546	DMD	MAP3K14	Endothelial
9.37978e-12	0.206027	0.109	0.058	3.43309e-07	DMD	BICRAL	Endothelial
1.70007e-09	0.205627	0.061	0.028	6.22243e-05	DMD	GFOD2	Endothelial
2.1787e-12	0.205563	0.129	0.071	7.97427e-08	DMD	GATAD2B	Endothelial
2.72188e-15	0.205158	0.169	0.094	9.96235e-11	DMD	FNDC3A	Endothelial
4.12427e-11	0.205037	0.088	0.044	1.50952e-06	DMD	IFT88	Endothelial
1.54553e-10	0.20501	0.07	0.032	5.65678e-06	DMD	WDR20	Endothelial
5.51329e-12	0.204882	0.09	0.044	2.01792e-07	DMD	GALNT1	Endothelial
8.557e-09	0.204874	0.052	0.023	0.000313195	DMD	NMRK1	Endothelial
8.12355e-14	0.204837	0.192	0.116	2.9733e-09	DMD	PIK3C2B	Endothelial
1.97209e-07	0.204784	0.054	0.027	0.00721805	DMD	AL049828.1	Endothelial
4.69537e-08	0.204526	0.032	0.01	0.00171855	DMD	THAP6	Endothelial
1.23077e-10	0.204385	0.071	0.032	4.50474e-06	DMD	LYPLAL1	Endothelial
7.87178e-08	0.204282	0.037	0.014	0.00288115	DMD	KDM4A-AS1	Endothelial
1.37876e-10	0.204032	0.083	0.041	5.04638e-06	DMD	EWSR1	Endothelial
4.98675e-10	0.203936	0.081	0.041	1.8252e-05	DMD	KLHDC2	Endothelial
2.54466e-10	0.203786	0.089	0.047	9.3137e-06	DMD	MTR	Endothelial
8.59733e-11	0.203708	0.086	0.044	3.14671e-06	DMD	VPS41	Endothelial
1.02157e-06	0.203574	0.011	0	0.0373905	DMD	AC023469.1	Endothelial
2.21932e-08	0.203569	0.05	0.022	0.000812293	DMD	WBP1L	Endothelial
1.12698e-08	0.203543	0.047	0.019	0.000412486	DMD	G2E3-AS1	Endothelial
9.02587e-14	0.203537	0.144	0.079	3.30356e-09	DMD	RAB1A	Endothelial
7.11046e-11	0.203517	0.1	0.053	2.6025e-06	DMD	VMP1	Endothelial
1.0911e-07	0.203432	0.039	0.015	0.00399355	DMD	WDR45B	Endothelial
1.34444e-08	0.203416	0.042	0.016	0.000492078	DMD	AC097515.1	Endothelial
6.91166e-08	0.2034	0.049	0.022	0.00252974	DMD	SEC13	Endothelial
1.21892e-07	0.203122	0.041	0.017	0.00446136	DMD	NONO	Endothelial
5.24761e-10	0.203069	0.059	0.025	1.92068e-05	DMD	NCK1-DT	Endothelial
3.01594e-07	0.202896	0.026	0.007	0.0110386	DMD	MOK	Endothelial
1.56388e-09	0.20288	0.087	0.046	5.72395e-05	DMD	BAALC-AS1	Endothelial
3.49226e-11	0.202738	0.076	0.035	1.2782e-06	DMD	IFNGR2	Endothelial
1.693e-09	0.20215	0.06	0.027	6.19656e-05	DMD	AC011933.4	Endothelial
4.60828e-07	0.20196	0.024	0.007	0.0168668	DMD	FAM78B	Endothelial
1.21722e-07	0.201726	0.067	0.036	0.00445513	DMD	EEF1A1	Endothelial
2.68251e-07	0.201695	0.022	0.005	0.00981826	DMD	AL035427.1	Endothelial
2.46106e-11	0.201667	0.096	0.049	9.00772e-07	DMD	DMD	Endothelial
1.40959e-07	0.201544	0.035	0.013	0.00515924	DMD	IFT172	Endothelial
2.15116e-09	0.201339	0.057	0.025	7.87345e-05	DMD	CEP162	Endothelial
4.76998e-07	0.20129	0.056	0.029	0.0174586	DMD	TAF1C	Endothelial
7.29076e-07	0.201194	0.034	0.014	0.0266849	DMD	DUOX1	Endothelial
3.60596e-18	0.200557	0.188	0.101	1.31982e-13	DMD	TUT4	Endothelial
1.61245e-10	0.200539	0.099	0.053	5.90172e-06	DMD	CLEC16A	Endothelial
2.75197e-17	0.200164	0.169	0.09	1.00725e-12	DMD	PPP2R2A	Endothelial
8.59959e-09	0.200137	0.077	0.041	0.000314754	DMD	TMEM161B-AS1	Endothelial
7.01139e-07	0.199521	0.039	0.017	0.0256624	DMD	ZNF236	Endothelial
5.74301e-10	0.199479	0.052	0.021	2.102e-05	DMD	PRPF40B	Endothelial
5.22411e-10	0.199406	0.072	0.035	1.91208e-05	DMD	SLC30A7	Endothelial
1.81951e-13	0.199404	0.145	0.081	6.65959e-09	DMD	RBM5	Endothelial
2.3142e-08	0.199205	0.067	0.034	0.00084702	DMD	TARBP1	Endothelial
1.01591e-12	0.199172	0.12	0.064	3.71832e-08	DMD	HNRNPA3	Endothelial
2.15386e-09	0.199043	0.068	0.033	7.88334e-05	DMD	ZNF254	Endothelial
1.14378e-13	0.198878	0.108	0.052	4.18636e-09	DMD	STAG2	Endothelial
6.35572e-14	0.198781	0.153	0.085	2.32626e-09	DMD	NLRC5	Endothelial
4.53516e-12	0.198725	0.112	0.059	1.65992e-07	DMD	CDYL	Endothelial
2.36087e-12	0.198668	0.108	0.056	8.64103e-08	DMD	MTAP	Endothelial
5.58381e-15	0.198648	0.091	0.038	2.04373e-10	DMD	NUBPL	Endothelial
5.3901e-15	0.198481	0.11	0.051	1.97283e-10	DMD	YLPM1	Endothelial
1.86117e-07	0.198309	0.041	0.017	0.00681208	DMD	CCDC12	Endothelial
5.51245e-21	0.198285	0.259	0.148	2.01761e-16	DMD	ADAMTS9-AS2	Endothelial
5.88443e-08	0.198281	0.039	0.015	0.00215376	DMD	FBXL13	Endothelial
4.56898e-07	0.198024	0.032	0.012	0.0167229	DMD	GPI	Endothelial
1.70716e-09	0.198016	0.062	0.028	6.24836e-05	DMD	AC243964.3	Endothelial
9.91396e-08	0.197633	0.051	0.024	0.00362861	DMD	PEX14	Endothelial
2.50043e-08	0.197521	0.058	0.028	0.000915183	DMD	HBP1	Endothelial
7.50462e-09	0.197487	0.085	0.047	0.000274676	DMD	TRDN	Endothelial
1.23549e-08	0.197078	0.055	0.025	0.000452202	DMD	MRE11	Endothelial
9.70897e-07	0.197066	0.041	0.019	0.0355358	DMD	TBC1D4	Endothelial
3.24507e-14	0.19697	0.118	0.059	1.18773e-09	DMD	GIT2	Endothelial
1.03428e-07	0.196839	0.068	0.037	0.00378555	DMD	NET1	Endothelial
3.84124e-07	0.196808	0.034	0.013	0.0140593	DMD	REL	Endothelial
1.07252e-07	0.19674	0.054	0.027	0.00392553	DMD	ANKDD1A	Endothelial
4.88951e-08	0.196608	0.045	0.019	0.00178961	DMD	BLCAP	Endothelial
8.11085e-20	0.196543	0.52	0.357	2.96865e-15	DMD	GNAQ	Endothelial
2.19549e-17	0.196213	0.275	0.17	8.03573e-13	DMD	GMDS-DT	Endothelial
2.12414e-08	0.196179	0.09	0.052	0.000777457	DMD	CD9	Endothelial
1.742e-19	0.196157	0.17	0.085	6.3759e-15	DMD	MAP2K5	Endothelial
6.4204e-07	0.196003	0.057	0.03	0.0234993	DMD	AC017101.1	Endothelial
1.27933e-10	0.195839	0.065	0.028	4.68248e-06	DMD	DYNC2H1	Endothelial
3.68893e-09	0.195805	0.077	0.04	0.000135018	DMD	CLK1	Endothelial
2.11853e-11	0.195636	0.105	0.055	7.75402e-07	DMD	UBAP2	Endothelial
1.76377e-09	0.195579	0.099	0.056	6.45558e-05	DMD	KPNA3	Endothelial
2.98688e-08	0.195573	0.056	0.026	0.00109323	DMD	ABHD6	Endothelial
8.0984e-08	0.195558	0.064	0.034	0.00296409	DMD	TIAL1	Endothelial
1.03409e-17	0.195472	0.154	0.077	3.78488e-13	DMD	MCU	Endothelial
4.76435e-09	0.195385	0.057	0.025	0.00017438	DMD	TNFRSF10D	Endothelial
6.17947e-07	0.195345	0.024	0.007	0.0226175	DMD	HEATR4	Endothelial
2.81122e-09	0.194988	0.083	0.044	0.000102893	DMD	PARG	Endothelial
6.45228e-17	0.194958	0.208	0.119	2.3616e-12	DMD	ICA1	Endothelial
8.50036e-09	0.194871	0.05	0.021	0.000311122	DMD	ANGEL2	Endothelial
3.81581e-09	0.194676	0.057	0.025	0.000139662	DMD	TECPR2	Endothelial
1.34977e-06	0.194674	0.012	0	0.0494029	DMD	FAM110B	Endothelial
2.89722e-08	0.194666	0.057	0.027	0.00106041	DMD	BMX	Endothelial
3.23713e-09	0.194648	0.063	0.029	0.000118482	DMD	PRORP	Endothelial
1.69795e-07	0.194579	0.023	0.006	0.00621468	DMD	BRCA1	Endothelial
5.05612e-09	0.194357	0.062	0.029	0.000185059	DMD	DIPK1B	Endothelial
4.30339e-10	0.194307	0.099	0.054	1.57508e-05	DMD	FAM219A	Endothelial
1.96171e-07	0.194275	0.046	0.021	0.00718007	DMD	MRPL33	Endothelial
1.07859e-14	0.194262	0.204	0.123	3.94776e-10	DMD	FILIP1L	Endothelial
1.34484e-19	0.194078	0.211	0.114	4.92223e-15	DMD	CLASP1	Endothelial
4.74661e-07	0.193953	0.056	0.029	0.0173731	DMD	DDX3X	Endothelial
1.33955e-06	0.193923	0.051	0.027	0.0490287	DMD	ABO	Endothelial
2.50665e-08	0.193612	0.074	0.039	0.00091746	DMD	UCKL1	Endothelial
3.39218e-08	0.19342	0.046	0.02	0.00124157	DMD	MIATNB	Endothelial
8.88516e-11	0.193218	0.111	0.061	3.25206e-06	DMD	VOPP1	Endothelial
1.75406e-09	0.193196	0.07	0.034	6.42002e-05	DMD	DNMT3A	Endothelial
2.63543e-07	0.193065	0.075	0.043	0.00964596	DMD	PIM3	Endothelial
1.51636e-11	0.192685	0.115	0.063	5.55003e-07	DMD	ARFGEF2	Endothelial
7.24248e-09	0.192513	0.057	0.026	0.000265082	DMD	TRAPPC11	Endothelial
3.87796e-09	0.192505	0.069	0.034	0.000141937	DMD	CCNT2	Endothelial
1.45138e-13	0.192431	0.129	0.069	5.31219e-09	DMD	SCLT1	Endothelial
7.81677e-10	0.192363	0.05	0.019	2.86102e-05	DMD	ARHGEF6	Endothelial
4.7468e-14	0.192223	0.104	0.049	1.73738e-09	DMD	GPCPD1	Endothelial
3.13815e-08	0.192169	0.051	0.023	0.00114859	DMD	SCGB2B2	Endothelial
6.34191e-07	0.19193	0.03	0.011	0.023212	DMD	AL590006.1	Endothelial
1.18718e-08	0.191889	0.053	0.024	0.000434519	DMD	RPA3	Endothelial
7.47856e-10	0.191826	0.085	0.044	2.73723e-05	DMD	TRAF3IP2-AS1	Endothelial
1.12388e-07	0.191773	0.09	0.053	0.00411353	DMD	MAK	Endothelial
1.21565e-10	0.191743	0.126	0.074	4.44939e-06	DMD	CFLAR-AS1	Endothelial
6.32469e-09	0.191591	0.079	0.042	0.00023149	DMD	DDX39B	Endothelial
9.43086e-07	0.191292	0.017	0.003	0.0345179	DMD	NPHP4	Endothelial
6.80778e-07	0.191277	0.023	0.007	0.0249172	DMD	ATP6AP1L	Endothelial
7.43992e-07	0.191157	0.035	0.015	0.0272309	DMD	CIC	Endothelial
2.16763e-07	0.191084	0.037	0.015	0.00793373	DMD	CUBN	Endothelial
2.27531e-08	0.190997	0.049	0.021	0.000832787	DMD	MARK2	Endothelial
6.12107e-10	0.190272	0.08	0.04	2.24037e-05	DMD	NUMA1	Endothelial
3.17658e-17	0.190225	0.202	0.114	1.16266e-12	DMD	SIK3	Endothelial
4.77858e-09	0.19019	0.077	0.04	0.000174901	DMD	ACTR3	Endothelial
4.7689e-08	0.189956	0.046	0.02	0.00174547	DMD	VAPB	Endothelial
3.42505e-10	0.189734	0.064	0.029	1.2536e-05	DMD	CYB5B	Endothelial
1.13998e-06	0.189697	0.037	0.016	0.0417243	DMD	PIGG	Endothelial
3.15046e-07	0.189648	0.042	0.019	0.011531	DMD	DNMT1	Endothelial
9.23935e-07	0.189573	0.074	0.044	0.033817	DMD	GRAMD1A	Endothelial
1.91477e-07	0.189194	0.042	0.018	0.00700826	DMD	ZNF780B	Endothelial
1.02701e-09	0.18916	0.076	0.038	3.75895e-05	DMD	EIF4A2	Endothelial
3.92381e-13	0.189114	0.164	0.096	1.43616e-08	DMD	PDXDC1	Endothelial
4.63432e-15	0.188894	0.207	0.125	1.69621e-10	DMD	MYRIP	Endothelial
2.75794e-08	0.188833	0.062	0.031	0.00100943	DMD	STK17A	Endothelial
5.62615e-09	0.188732	0.071	0.036	0.000205923	DMD	KIF2A	Endothelial
4.91348e-09	0.188723	0.048	0.02	0.000179838	DMD	ZDHHC13	Endothelial
1.09602e-06	0.188253	0.035	0.015	0.0401155	DMD	HPS4	Endothelial
9.63824e-11	0.188156	0.138	0.082	3.52769e-06	DMD	EHMT1	Endothelial
3.14488e-08	0.188075	0.075	0.041	0.00115106	DMD	TBC1D19	Endothelial
1.30274e-06	0.187935	0.027	0.009	0.0476817	DMD	TNNI3K	Endothelial
1.2954e-09	0.187924	0.083	0.044	4.74128e-05	DMD	FKBP1A	Endothelial
2.39327e-07	0.1878	0.047	0.022	0.0087596	DMD	AC007216.4	Endothelial
1.11474e-06	0.187638	0.033	0.014	0.0408005	DMD	GK5	Endothelial
1.25643e-12	0.187384	0.123	0.066	4.59864e-08	DMD	ADD3	Endothelial
3.37595e-07	0.187317	0.027	0.008	0.0123563	DMD	RPS4Y1	Endothelial
2.25889e-07	0.187164	0.023	0.006	0.00826776	DMD	OLFM1	Endothelial
2.77982e-07	0.187154	0.017	0.002	0.0101744	DMD	AC008555.2	Endothelial
3.35063e-07	0.186992	0.04	0.017	0.0122636	DMD	PDCD6	Endothelial
5.01314e-11	0.186948	0.091	0.046	1.83486e-06	DMD	PRELID2	Endothelial
5.0289e-10	0.186889	0.048	0.017	1.84063e-05	DMD	ZFY	Endothelial
2.25306e-08	0.186549	0.041	0.016	0.000824642	DMD	RANBP10	Endothelial
6.40757e-09	0.186459	0.077	0.04	0.000234523	DMD	EXD3	Endothelial
1.99157e-13	0.186365	0.102	0.049	7.28934e-09	DMD	MYSM1	Endothelial
1.33552e-17	0.186109	0.596	0.435	4.88815e-13	DMD	FBXL7	Endothelial
5.4644e-09	0.185936	0.058	0.027	0.000200002	DMD	AC068533.3	Endothelial
2.31195e-08	0.185772	0.057	0.027	0.000846197	DMD	AF117829.1	Endothelial
4.91384e-10	0.185759	0.103	0.057	1.79852e-05	DMD	SRGAP1	Endothelial
3.66431e-12	0.185724	0.095	0.047	1.34117e-07	DMD	TOP2B	Endothelial
1.6626e-15	0.185621	0.167	0.092	6.08529e-11	DMD	ATP9B	Endothelial
1.27138e-07	0.185578	0.064	0.034	0.00465337	DMD	DNAJC10	Endothelial
1.06848e-07	0.185369	0.047	0.022	0.00391076	DMD	WDR75	Endothelial
1.80955e-10	0.185159	0.1	0.054	6.62313e-06	DMD	TTLL5	Endothelial
3.09656e-11	0.185096	0.089	0.044	1.13337e-06	DMD	LRPPRC	Endothelial
1.12698e-06	0.184807	0.02	0.005	0.0412486	DMD	AC025917.1	Endothelial
4.88367e-07	0.184744	0.039	0.017	0.0178747	DMD	MDM2	Endothelial
6.77727e-09	0.184704	0.062	0.029	0.000248055	DMD	PRPF18	Endothelial
2.35361e-07	0.184498	0.027	0.008	0.00861445	DMD	SLC13A4	Endothelial
3.41721e-10	0.184403	0.068	0.031	1.25073e-05	DMD	ZNF506	Endothelial
2.16219e-07	0.184398	0.017	0.002	0.00791382	DMD	CADM3	Endothelial
1.03457e-11	0.184304	0.109	0.058	3.78661e-07	DMD	KLHL28	Endothelial
3.41307e-07	0.184297	0.045	0.021	0.0124922	DMD	TMEM161B	Endothelial
4.66347e-07	0.183978	0.021	0.005	0.0170688	DMD	ARRDC3-AS1	Endothelial
1.97341e-07	0.183966	0.046	0.021	0.00722288	DMD	AL359232.1	Endothelial
1.40478e-12	0.183956	0.107	0.055	5.14164e-08	DMD	LINC01004	Endothelial
2.18344e-17	0.183685	0.437	0.295	7.9916e-13	DMD	TTC28	Endothelial
1.16031e-13	0.183546	0.122	0.063	4.24687e-09	DMD	RSRC1	Endothelial
5.5618e-09	0.183195	0.056	0.025	0.000203568	DMD	SETD3	Endothelial
3.71525e-16	0.182285	0.203	0.117	1.35982e-11	DMD	ERBIN	Endothelial
4.61231e-08	0.182282	0.092	0.054	0.00168815	DMD	ITGA9-AS1	Endothelial
2.08298e-07	0.18216	0.031	0.011	0.0076239	DMD	AC022101.1	Endothelial
2.40528e-08	0.182042	0.064	0.032	0.000880357	DMD	PDLIM3	Endothelial
1.77131e-10	0.182039	0.136	0.082	6.48318e-06	DMD	AL157938.2	Endothelial
8.08657e-09	0.182034	0.06	0.028	0.000295977	DMD	NVL	Endothelial
5.81233e-10	0.181775	0.079	0.039	2.12737e-05	DMD	BAZ2A	Endothelial
8.07805e-10	0.181746	0.079	0.04	2.95665e-05	DMD	PARN	Endothelial
1.2614e-06	0.181652	0.024	0.007	0.0461686	DMD	FAM114A2	Endothelial
7.13933e-07	0.181436	0.05	0.025	0.0261307	DMD	NFE2L1	Endothelial
6.2074e-07	0.18133	0.057	0.03	0.0227197	DMD	IFT43	Endothelial
1.24301e-08	0.181316	0.059	0.028	0.000454954	DMD	MXI1	Endothelial
1.5006e-10	0.181116	0.122	0.071	5.49234e-06	DMD	ACVR2A	Endothelial
3.95393e-14	0.181112	0.138	0.074	1.44718e-09	DMD	CNOT6L	Endothelial
3.99443e-07	0.180889	0.043	0.02	0.01462	DMD	ATG12	Endothelial
1.25946e-09	0.180819	0.076	0.038	4.60975e-05	DMD	RALGDS	Endothelial
2.27659e-12	0.1807	0.086	0.04	8.33253e-08	DMD	TIA1	Endothelial
5.70788e-13	0.180598	0.116	0.06	2.08914e-08	DMD	UBE2W	Endothelial
9.91796e-19	0.180597	0.337	0.214	3.63007e-14	DMD	MAML2	Endothelial
6.641e-07	0.18039	0.03	0.011	0.0243067	DMD	SH3YL1	Endothelial
5.07935e-10	0.180282	0.063	0.028	1.85909e-05	DMD	LINC00174	Endothelial
8.85443e-10	0.180126	0.079	0.04	3.24081e-05	DMD	ENOSF1	Endothelial
7.91948e-12	0.179718	0.146	0.086	2.89861e-07	DMD	DNAJC18	Endothelial
8.98256e-10	0.179429	0.077	0.038	3.28771e-05	DMD	SRP54	Endothelial
2.31675e-07	0.179305	0.052	0.025	0.00847954	DMD	AP000442.1	Endothelial
8.48578e-07	0.178947	0.012	0	0.0310588	DMD	SPATA12	Endothelial
1.10351e-07	0.17894	0.062	0.032	0.00403897	DMD	MBTPS1	Endothelial
4.6697e-08	0.178552	0.077	0.043	0.00170916	DMD	EPB41L3	Endothelial
3.0634e-08	0.178375	0.053	0.025	0.00112124	DMD	ITSN1	Endothelial
2.0679e-11	0.178312	0.109	0.058	7.56872e-07	DMD	TRIM44	Endothelial
1.36019e-10	0.178249	0.065	0.028	4.97842e-06	DMD	MBOAT2	Endothelial
7.1822e-07	0.178161	0.051	0.026	0.0262876	DMD	ARHGEF1	Endothelial
2.0105e-07	0.177885	0.077	0.044	0.00735863	DMD	ETFA	Endothelial
1.56857e-09	0.177876	0.071	0.035	5.74112e-05	DMD	AFAP1	Endothelial
1.56219e-11	0.177864	0.108	0.058	5.71778e-07	DMD	NFKB1	Endothelial
6.42672e-08	0.177779	0.052	0.024	0.00235224	DMD	AKAP11	Endothelial
1.22091e-09	0.177647	0.079	0.04	4.46866e-05	DMD	NUP98	Endothelial
3.19782e-11	0.177605	0.081	0.038	1.17043e-06	DMD	RPS6KA5	Endothelial
1.73171e-09	0.177423	0.118	0.07	6.33823e-05	DMD	AC022126.1	Endothelial
3.90241e-07	0.177328	0.028	0.009	0.0142832	DMD	ELF4	Endothelial
1.41297e-14	0.17725	0.169	0.096	5.1716e-10	DMD	FARS2	Endothelial
2.77289e-10	0.177241	0.09	0.047	1.0149e-05	DMD	B4GALT5	Endothelial
1.85349e-11	0.177214	0.07	0.03	6.78397e-07	DMD	STXBP3	Endothelial
5.89183e-08	0.176894	0.049	0.022	0.00215647	DMD	FGD5-AS1	Endothelial
1.23709e-06	0.176872	0.05	0.026	0.0452789	DMD	KAZN	Endothelial
5.64194e-11	0.176805	0.1	0.053	2.06501e-06	DMD	LAP3	Endothelial
3.52877e-07	0.17678	0.042	0.019	0.0129156	DMD	NIBAN2	Endothelial
1.26496e-07	0.176752	0.035	0.013	0.00462988	DMD	ALG5	Endothelial
1.36904e-12	0.176516	0.119	0.063	5.01081e-08	DMD	ALG13	Endothelial
2.30156e-09	0.176325	0.107	0.062	8.42393e-05	DMD	TNNC1	Endothelial
1.03107e-08	0.176217	0.059	0.028	0.000377382	DMD	PNPT1	Endothelial
8.96325e-07	0.176074	0.04	0.018	0.0328064	DMD	BMS1	Endothelial
2.25361e-10	0.175888	0.139	0.085	8.24845e-06	DMD	MYL2	Endothelial
7.23346e-07	0.175655	0.031	0.012	0.0264752	DMD	SINHCAF	Endothelial
2.71591e-11	0.175553	0.134	0.078	9.94051e-07	DMD	CUX1	Endothelial
9.52066e-10	0.175528	0.125	0.075	3.48466e-05	DMD	SIPA1L1	Endothelial
1.51891e-13	0.175461	0.143	0.079	5.55937e-09	DMD	EXOC1	Endothelial
6.91429e-13	0.17544	0.172	0.102	2.5307e-08	DMD	MYO15B	Endothelial
1.65526e-08	0.175428	0.066	0.033	0.000605842	DMD	MCM3AP	Endothelial
4.59942e-10	0.175256	0.099	0.054	1.68343e-05	DMD	AC087854.1	Endothelial
5.87551e-13	0.175245	0.133	0.073	2.15049e-08	DMD	HNRNPC	Endothelial
2.39347e-07	0.175011	0.049	0.023	0.00876035	DMD	SCRG1	Endothelial
1.17605e-08	0.174692	0.066	0.033	0.000430445	DMD	CCDC146	Endothelial
1.44518e-10	0.174628	0.131	0.077	5.28951e-06	DMD	NREP	Endothelial
9.50692e-09	0.174558	0.039	0.014	0.000347963	DMD	TPCN1	Endothelial
1.13191e-07	0.174401	0.08	0.046	0.00414292	DMD	CHODL	Endothelial
9.42898e-10	0.174171	0.07	0.033	3.4511e-05	DMD	PDE4B	Endothelial
1.89299e-07	0.174015	0.062	0.032	0.00692854	DMD	AC068724.3	Endothelial
1.30291e-06	0.173649	0.042	0.02	0.0476879	DMD	ARL8B	Endothelial
1.83132e-08	0.17364	0.065	0.033	0.00067028	DMD	PRPSAP1	Endothelial
3.59111e-14	0.173589	0.079	0.031	1.31438e-09	DMD	LINC00278	Endothelial
1.19481e-06	0.173546	0.02	0.005	0.0437314	DMD	SEMA4D	Endothelial
7.70749e-07	0.173323	0.06	0.032	0.0282102	DMD	RPL31	Endothelial
3.61895e-08	0.173174	0.041	0.016	0.00132457	DMD	AKR1C3	Endothelial
3.40536e-09	0.173169	0.08	0.042	0.00012464	DMD	ZNF235	Endothelial
2.96197e-13	0.17298	0.125	0.066	1.08411e-08	DMD	KIAA0319L	Endothelial
4.50729e-07	0.172844	0.039	0.016	0.0164971	DMD	RNASEH2B	Endothelial
6.84349e-07	0.172635	0.039	0.017	0.0250479	DMD	IARS2	Endothelial
9.44832e-10	0.172622	0.083	0.043	3.45818e-05	DMD	FBXL4	Endothelial
3.63132e-07	0.172565	0.029	0.01	0.013291	DMD	CEP44	Endothelial
2.35986e-10	0.172512	0.082	0.041	8.63732e-06	DMD	SLC35G2	Endothelial
3.91014e-09	0.172372	0.072	0.037	0.000143115	DMD	EFR3A	Endothelial
1.11716e-15	0.172358	0.196	0.113	4.08892e-11	DMD	IGFBP4	Endothelial
7.68454e-10	0.172354	0.077	0.038	2.81262e-05	DMD	AC005753.2	Endothelial
1.21728e-10	0.172272	0.138	0.082	4.45538e-06	DMD	SRSF5	Endothelial
3.83631e-08	0.172194	0.052	0.023	0.00140413	DMD	CACNA2D1	Endothelial
3.51356e-08	0.172164	0.069	0.036	0.001286	DMD	STT3B	Endothelial
4.39875e-11	0.172013	0.078	0.037	1.60999e-06	DMD	DERA	Endothelial
2.92199e-11	0.171995	0.089	0.044	1.06948e-06	DMD	JAK2	Endothelial
1.77563e-12	0.171976	0.146	0.084	6.49898e-08	DMD	AHI1	Endothelial
5.15314e-08	0.171873	0.033	0.011	0.0018861	DMD	AC008149.2	Endothelial
4.6491e-07	0.17167	0.037	0.015	0.0170162	DMD	DDX3Y	Endothelial
2.09358e-08	0.17146	0.061	0.03	0.000766273	DMD	KANTR	Endothelial
3.8519e-07	0.171408	0.02	0.004	0.0140983	DMD	ZNF484	Endothelial
8.45935e-17	0.171259	0.184	0.101	3.09621e-12	DMD	NEK7	Endothelial
1.64974e-10	0.171059	0.097	0.052	6.03821e-06	DMD	FNBP1	Endothelial
5.01488e-07	0.170943	0.058	0.031	0.018355	DMD	PROCR	Endothelial
9.3994e-09	0.1709	0.07	0.036	0.000344027	DMD	SUCLA2	Endothelial
1.71503e-07	0.170882	0.054	0.027	0.00627717	DMD	KCTD20	Endothelial
1.71204e-10	0.169971	0.12	0.069	6.26623e-06	DMD	HEATR5B	Endothelial
6.37269e-15	0.169731	0.197	0.116	2.33247e-10	DMD	TEAD1	Endothelial
1.8318e-08	0.169505	0.045	0.018	0.000670457	DMD	UBL3	Endothelial
2.37649e-13	0.169426	0.119	0.061	8.69819e-09	DMD	PELI2	Endothelial
6.93374e-15	0.169258	0.316	0.208	2.53782e-10	DMD	RAPGEF5	Endothelial
4.78994e-09	0.16922	0.088	0.049	0.000175317	DMD	VAPA	Endothelial
2.02553e-12	0.169061	0.108	0.055	7.41364e-08	DMD	PPP4R3B	Endothelial
1.11061e-11	0.169059	0.105	0.055	4.06496e-07	DMD	FUBP1	Endothelial
5.94693e-11	0.169058	0.149	0.09	2.17664e-06	DMD	TNNT1	Endothelial
3.30172e-07	0.169044	0.038	0.016	0.0120846	DMD	LINC01376	Endothelial
6.4023e-07	0.169039	0.041	0.018	0.023433	DMD	FANCM	Endothelial
1.85535e-10	0.168933	0.068	0.03	6.79077e-06	DMD	SPIN1	Endothelial
1.83449e-16	0.168809	0.28	0.175	6.71441e-12	DMD	SP100	Endothelial
6.32326e-10	0.168749	0.101	0.056	2.31438e-05	DMD	RCOR3	Endothelial
2.99244e-09	0.168656	0.15	0.096	0.000109526	DMD	DPYSL3	Endothelial
1.71716e-08	0.168611	0.076	0.041	0.000628499	DMD	R3HCC1L	Endothelial
1.29334e-18	0.168608	0.22	0.125	4.73376e-14	DMD	WDPCP	Endothelial
7.27974e-07	0.168573	0.05	0.025	0.0266446	DMD	NAA16	Endothelial
2.70822e-07	0.168297	0.041	0.018	0.00991236	DMD	SLC35A1	Endothelial
1.13523e-09	0.168021	0.065	0.03	4.15506e-05	DMD	SPATA6	Endothelial
3.77838e-07	0.167738	0.048	0.023	0.0138293	DMD	EFHC1	Endothelial
6.06892e-07	0.167675	0.059	0.032	0.0222128	DMD	RFC1	Endothelial
1.64973e-08	0.166995	0.056	0.026	0.000603817	DMD	STAM2	Endothelial
3.64935e-07	0.166981	0.068	0.037	0.013357	DMD	NR2F2	Endothelial
1.02896e-07	0.166975	0.046	0.021	0.0037661	DMD	KDM1A	Endothelial
1.0156e-06	0.16693	0.047	0.023	0.0371719	DMD	GNAI3	Endothelial
6.33695e-13	0.16682	0.137	0.076	2.31939e-08	DMD	CEP68	Endothelial
4.67197e-16	0.166785	0.195	0.112	1.70999e-11	DMD	ATG7	Endothelial
2.17266e-07	0.166773	0.037	0.015	0.00795214	DMD	AL157786.1	Endothelial
9.91383e-07	0.16654	0.071	0.041	0.0362856	DMD	SYNPO	Endothelial
1.2889e-10	0.166433	0.077	0.037	4.71749e-06	DMD	RPTOR	Endothelial
5.31402e-08	0.1664	0.077	0.043	0.00194499	DMD	AC010894.3	Endothelial
7.74747e-18	0.166226	0.276	0.167	2.83565e-13	DMD	MYCBP2	Endothelial
3.16945e-11	0.166189	0.138	0.081	1.16005e-06	DMD	DDX60L	Endothelial
2.85748e-12	0.165915	0.139	0.079	1.04587e-07	DMD	NBAS	Endothelial
3.5898e-12	0.16577	0.137	0.077	1.3139e-07	DMD	METTL15	Endothelial
2.50136e-11	0.165587	0.106	0.056	9.15521e-07	DMD	UBE2R2	Endothelial
1.97764e-08	0.165428	0.065	0.033	0.000723838	DMD	ZCCHC14	Endothelial
4.75896e-07	0.165206	0.031	0.011	0.0174183	DMD	KATNAL2	Endothelial
3.28866e-07	0.165038	0.056	0.029	0.0120368	DMD	HBS1L	Endothelial
1.53624e-11	0.164899	0.082	0.038	5.62278e-07	DMD	TRMT11	Endothelial
3.72868e-07	0.164897	0.035	0.014	0.0136473	DMD	EIF4ENIF1	Endothelial
2.36309e-15	0.164506	0.174	0.097	8.64914e-11	DMD	RBM26	Endothelial
2.05931e-11	0.164083	0.141	0.082	7.5373e-07	DMD	TMEM165	Endothelial
5.81566e-13	0.16396	0.185	0.112	2.12859e-08	DMD	EBF3	Endothelial
7.94593e-07	0.163871	0.029	0.01	0.0290829	DMD	STAM	Endothelial
6.58244e-09	0.163591	0.064	0.031	0.000240924	DMD	SPATA6L	Endothelial
5.00377e-07	0.163579	0.056	0.029	0.0183143	DMD	AC046134.2	Endothelial
3.90098e-21	0.16352	0.382	0.238	1.4278e-16	DMD	ARID1B	Endothelial
4.99392e-08	0.163508	0.052	0.024	0.00182782	DMD	ZNF708	Endothelial
7.71975e-16	0.163463	0.324	0.211	2.82551e-11	DMD	PDE4D	Endothelial
1.16297e-07	0.163276	0.032	0.011	0.0042566	DMD	C1RL	Endothelial
1.96786e-14	0.163244	0.146	0.079	7.20257e-10	DMD	SF3B1	Endothelial
1.81612e-07	0.163185	0.055	0.027	0.00664718	DMD	WDR48	Endothelial
6.19033e-12	0.163148	0.12	0.066	2.26572e-07	DMD	PHF3	Endothelial
4.05525e-08	0.16302	0.035	0.012	0.00148426	DMD	AFG1L	Endothelial
1.05542e-13	0.162927	0.134	0.072	3.86294e-09	DMD	SUMF1	Endothelial
1.82179e-10	0.162765	0.088	0.045	6.66792e-06	DMD	SYNRG	Endothelial
8.23687e-14	0.162747	0.199	0.121	3.01478e-09	DMD	SRPK2	Endothelial
1.55884e-10	0.162646	0.085	0.043	5.7055e-06	DMD	ATM	Endothelial
1.27202e-07	0.162571	0.026	0.007	0.00465572	DMD	TBC1D2	Endothelial
4.48251e-15	0.162488	0.218	0.131	1.64064e-10	DMD	C20orf194	Endothelial
3.66034e-09	0.16233	0.071	0.036	0.000133972	DMD	EPC2	Endothelial
9.86381e-12	0.162038	0.091	0.044	3.61025e-07	DMD	SMG7	Endothelial
2.10909e-07	0.161633	0.044	0.02	0.00771948	DMD	ADGRA2	Endothelial
4.43129e-11	0.16152	0.092	0.046	1.6219e-06	DMD	CNOT1	Endothelial
5.50773e-08	0.161155	0.044	0.018	0.00201588	DMD	UBXN7	Endothelial
3.20601e-13	0.160978	0.115	0.059	1.17343e-08	DMD	PPIP5K2	Endothelial
1.62748e-07	0.160974	0.035	0.013	0.00595673	DMD	ZNF808	Endothelial
3.25505e-08	0.160812	0.061	0.03	0.00119138	DMD	CHD8	Endothelial
1.40874e-08	0.160791	0.08	0.044	0.000515612	DMD	MINDY3	Endothelial
3.5561e-07	0.160779	0.037	0.015	0.0130157	DMD	AC006299.1	Endothelial
7.92084e-08	0.160698	0.021	0.004	0.00289911	DMD	TESC	Endothelial
5.43397e-11	0.160555	0.133	0.078	1.98889e-06	DMD	VIM	Endothelial
3.50007e-08	0.160542	0.062	0.031	0.00128106	DMD	TRIM24	Endothelial
1.22809e-10	0.1605	0.097	0.051	4.49492e-06	DMD	AL354733.3	Endothelial
3.79331e-19	0.159717	0.338	0.21	1.38839e-14	DMD	BIRC6	Endothelial
3.68726e-07	0.15965	0.054	0.027	0.0134957	DMD	LATS1	Endothelial
1.82495e-07	0.15891	0.028	0.008	0.00667949	DMD	ZNF737	Endothelial
5.8182e-08	0.158153	0.051	0.023	0.00212952	DMD	DNAJC9	Endothelial
1.09385e-16	0.158141	0.483	0.337	4.00362e-12	DMD	NFIA	Endothelial
3.93215e-07	0.158093	0.091	0.056	0.014392	DMD	MX1	Endothelial
1.95591e-09	0.158036	0.119	0.071	7.15882e-05	DMD	HOOK3	Endothelial
1.36033e-15	0.157599	0.217	0.128	4.97895e-11	DMD	CAST	Endothelial
4.38693e-11	0.157481	0.11	0.059	1.60566e-06	DMD	RBL2	Endothelial
2.98783e-11	0.157473	0.131	0.075	1.09358e-06	DMD	TMEM131	Endothelial
2.2137e-07	0.157379	0.049	0.023	0.00810236	DMD	DHX9	Endothelial
3.20295e-08	0.157354	0.069	0.036	0.00117231	DMD	ACADM	Endothelial
1.24365e-14	0.157064	0.236	0.146	4.55187e-10	DMD	PARP14	Endothelial
3.15366e-08	0.157012	0.041	0.016	0.00115427	DMD	TRIM66	Endothelial
5.58125e-11	0.156919	0.143	0.086	2.04279e-06	DMD	NPEPPS	Endothelial
5.89929e-07	0.156915	0.042	0.019	0.021592	DMD	GART	Endothelial
5.0507e-07	0.156745	0.057	0.03	0.0184861	DMD	PARP12	Endothelial
1.83883e-09	0.156693	0.075	0.037	6.73029e-05	DMD	SFSWAP	Endothelial
1.09564e-10	0.156602	0.126	0.073	4.01016e-06	DMD	USP24	Endothelial
2.67698e-09	0.156528	0.088	0.048	9.79803e-05	DMD	TCF4-AS1	Endothelial
9.58667e-10	0.156433	0.076	0.038	3.50882e-05	DMD	KCTD3	Endothelial
2.91916e-11	0.156323	0.121	0.067	1.06844e-06	DMD	CAMSAP2	Endothelial
6.79032e-08	0.156287	0.076	0.042	0.00248532	DMD	CD47	Endothelial
1.31174e-11	0.156118	0.099	0.05	4.80109e-07	DMD	ORC4	Endothelial
5.70723e-17	0.155885	0.237	0.14	2.0889e-12	DMD	IGF1R	Endothelial
5.68237e-15	0.155735	0.182	0.104	2.0798e-10	DMD	RASA2	Endothelial
8.52559e-07	0.155671	0.06	0.032	0.0312045	DMD	BRI3	Endothelial
9.4322e-07	0.155234	0.033	0.013	0.0345228	DMD	TADA2A	Endothelial
3.99939e-07	0.155023	0.046	0.022	0.0146382	DMD	CSTF3	Endothelial
7.99726e-14	0.154632	0.157	0.088	2.92708e-09	DMD	TNKS	Endothelial
2.30745e-10	0.153982	0.114	0.065	8.4455e-06	DMD	ABCC4	Endothelial
5.35375e-11	0.153954	0.132	0.077	1.95953e-06	DMD	KDM6A	Endothelial
4.25328e-09	0.153732	0.085	0.046	0.000155674	DMD	IQCJ-SCHIP1	Endothelial
1.64403e-07	0.15365	0.028	0.009	0.00601733	DMD	CCDC148	Endothelial
4.81091e-08	0.153639	0.097	0.058	0.00176084	DMD	SOX13	Endothelial
8.62527e-13	0.153548	0.136	0.075	3.15693e-08	DMD	NFATC3	Endothelial
3.89543e-08	0.153406	0.068	0.036	0.00142577	DMD	GALNT11	Endothelial
1.5577e-12	0.153214	0.135	0.075	5.70132e-08	DMD	DIP2B	Endothelial
1.79818e-07	0.153178	0.048	0.022	0.00658151	DMD	UBE2V1	Endothelial
4.14983e-11	0.153027	0.119	0.066	1.51888e-06	DMD	ATXN7L1	Endothelial
1.19441e-07	0.152663	0.055	0.027	0.00437166	DMD	PTGES3	Endothelial
5.60542e-11	0.152555	0.115	0.064	2.05164e-06	DMD	WRN	Endothelial
4.31087e-11	0.152475	0.098	0.051	1.57782e-06	DMD	ADNP	Endothelial
1.19857e-07	0.152436	0.063	0.033	0.00438688	DMD	NRDE2	Endothelial
2.42534e-15	0.152407	0.166	0.091	8.87699e-11	DMD	USP25	Endothelial
8.28817e-07	0.152323	0.053	0.028	0.0303355	DMD	WDR43	Endothelial
9.9274e-10	0.151922	0.125	0.075	3.63353e-05	DMD	TNXB	Endothelial
6.13979e-09	0.151729	0.052	0.022	0.000224722	DMD	USP14	Endothelial
2.81228e-08	0.151701	0.07	0.037	0.00102932	DMD	MAPK6	Endothelial
3.78875e-07	0.151679	0.059	0.031	0.0138672	DMD	TP53I11	Endothelial
1.64049e-08	0.151377	0.057	0.026	0.000600436	DMD	COG6	Endothelial
2.97967e-10	0.151367	0.082	0.041	1.09059e-05	DMD	ZNRF1	Endothelial
3.17001e-10	0.151274	0.103	0.057	1.16025e-05	DMD	TRRAP	Endothelial
1.35818e-07	0.151202	0.058	0.029	0.00497108	DMD	STAU1	Endothelial
1.77602e-09	0.151152	0.112	0.065	6.5004e-05	DMD	TOP1	Endothelial
6.67435e-08	0.151089	0.056	0.027	0.00244288	DMD	ATP6V0A1	Endothelial
1.5218e-11	0.151041	0.101	0.052	5.56993e-07	DMD	LCOR	Endothelial
1.13804e-08	0.150795	0.111	0.067	0.000416535	DMD	YAP1	Endothelial
6.23379e-10	0.15057	0.098	0.053	2.28163e-05	DMD	WASHC4	Endothelial
1.02653e-06	0.150433	0.043	0.021	0.0375719	DMD	AZIN1	Endothelial
2.02189e-07	0.1504	0.025	0.007	0.00740033	DMD	CLCN5	Endothelial
2.88511e-07	0.150384	0.037	0.015	0.0105598	DMD	AC053527.2	Endothelial
4.61509e-07	0.150193	0.074	0.042	0.0168917	DMD	CNTNAP3	Endothelial
6.71254e-10	0.150149	0.089	0.047	2.45686e-05	DMD	ATP2A2	Endothelial
2.52064e-08	0.149428	0.093	0.054	0.00092258	DMD	MLLT6	Endothelial
1.12414e-07	0.149356	0.048	0.022	0.00411445	DMD	INTS9	Endothelial
2.95273e-13	0.149	0.126	0.066	1.08073e-08	DMD	TPT1-AS1	Endothelial
3.8797e-17	0.148987	0.537	0.37	1.42001e-12	DMD	PTK2	Endothelial
1.08083e-07	0.148856	0.075	0.042	0.00395596	DMD	AC068587.4	Endothelial
1.39469e-09	0.148757	0.093	0.051	5.10471e-05	DMD	PPP2R5C	Endothelial
4.03186e-08	0.148624	0.087	0.05	0.0014757	DMD	LUC7L	Endothelial
7.5839e-10	0.148614	0.111	0.064	2.77578e-05	DMD	ZNF33A	Endothelial
2.09113e-08	0.148514	0.08	0.044	0.000765374	DMD	ZNF75D	Endothelial
1.39882e-07	0.148384	0.053	0.025	0.00511984	DMD	JAM3	Endothelial
7.65864e-08	0.147946	0.067	0.036	0.00280314	DMD	MRPS31	Endothelial
2.15495e-09	0.147942	0.084	0.044	7.88735e-05	DMD	HOXB3	Endothelial
4.68652e-07	0.147795	0.068	0.038	0.0171531	DMD	PIGC	Endothelial
1.23993e-06	0.147684	0.075	0.044	0.0453827	DMD	LMNA	Endothelial
4.48754e-09	0.147446	0.091	0.05	0.000164248	DMD	CSNK1G1	Endothelial
8.94509e-12	0.147422	0.114	0.061	3.27399e-07	DMD	PAPOLA	Endothelial
3.68185e-07	0.147391	0.077	0.044	0.0134759	DMD	NECTIN2	Endothelial
6.83279e-09	0.147302	0.061	0.029	0.000250087	DMD	SNRNP200	Endothelial
2.50246e-08	0.146561	0.081	0.045	0.000915925	DMD	TOM1L2	Endothelial
1.46884e-07	0.146536	0.085	0.05	0.00537611	DMD	ECSCR	Endothelial
1.28119e-10	0.146157	0.125	0.072	4.68927e-06	DMD	RFX7	Endothelial
2.67386e-11	0.14586	0.108	0.058	9.78661e-07	DMD	MIB1	Endothelial
7.03516e-08	0.145377	0.086	0.05	0.00257494	DMD	CKMT2-AS1	Endothelial
1.64819e-08	0.145329	0.055	0.025	0.000603254	DMD	SUCO	Endothelial
7.98343e-08	0.145224	0.065	0.034	0.00292202	DMD	ZNF43	Endothelial
1.02356e-18	0.145127	0.286	0.172	3.74634e-14	DMD	FAM172A	Endothelial
6.08282e-13	0.144892	0.179	0.108	2.22637e-08	DMD	FAR2	Endothelial
4.95737e-07	0.14473	0.048	0.023	0.0181445	DMD	WDR12	Endothelial
4.94779e-07	0.144678	0.058	0.03	0.0181094	DMD	CASZ1	Endothelial
4.15749e-08	0.14439	0.079	0.044	0.00152168	DMD	DHX15	Endothelial
3.96212e-08	0.143559	0.076	0.042	0.00145018	DMD	SIL1	Endothelial
1.53505e-07	0.143477	0.071	0.039	0.00561842	DMD	MPP5	Endothelial
4.0078e-12	0.143329	0.155	0.091	1.4669e-07	DMD	FAM135A	Endothelial
8.57111e-07	0.142903	0.034	0.014	0.0313711	DMD	RBM28	Endothelial
1.63567e-16	0.14267	0.216	0.125	5.98671e-12	DMD	WDFY3	Endothelial
1.41438e-08	0.14258	0.072	0.037	0.000517675	DMD	SOGA1	Endothelial
7.12344e-07	0.14232	0.043	0.02	0.0260725	DMD	AL606489.1	Endothelial
8.39265e-07	0.142301	0.042	0.019	0.0307179	DMD	MSH6	Endothelial
7.71199e-13	0.141982	0.144	0.081	2.82266e-08	DMD	TRAPPC9	Endothelial
7.2267e-08	0.141803	0.105	0.065	0.00264505	DMD	ANGPT2	Endothelial
6.30696e-07	0.141668	0.039	0.017	0.0230841	DMD	CFAP44	Endothelial
1.31285e-08	0.141357	0.098	0.057	0.000480517	DMD	ATXN10	Endothelial
5.84945e-07	0.141144	0.04	0.018	0.0214096	DMD	CRYBG1	Endothelial
1.44821e-10	0.140998	0.109	0.06	5.3006e-06	DMD	NSUN6	Endothelial
8.44808e-13	0.140832	0.167	0.099	3.09208e-08	DMD	UBR3	Endothelial
3.13271e-08	0.140426	0.078	0.043	0.0011466	DMD	TASP1	Endothelial
1.06122e-06	0.140415	0.055	0.029	0.0388417	DMD	FBXW4	Endothelial
1.21726e-07	0.140295	0.046	0.021	0.00445529	DMD	Z83843.1	Endothelial
2.08259e-11	0.140178	0.124	0.069	7.62249e-07	DMD	STRN3	Endothelial
8.68044e-08	0.14017	0.067	0.036	0.00317713	DMD	UBR4	Endothelial
1.19594e-07	0.140003	0.07	0.038	0.00437726	DMD	TMEM181	Endothelial
4.34872e-07	0.139926	0.071	0.04	0.0159168	DMD	AL162586.2	Endothelial
2.02835e-12	0.139811	0.207	0.13	7.42397e-08	DMD	ATXN1	Endothelial
2.16578e-08	0.13975	0.056	0.026	0.000792696	DMD	GPR107	Endothelial
1.0498e-06	0.139725	0.049	0.024	0.0384238	DMD	RUNDC3B	Endothelial
2.15572e-09	0.139527	0.096	0.053	7.89015e-05	DMD	EXOC2	Endothelial
2.39039e-09	0.139511	0.16	0.103	8.74908e-05	DMD	AC083870.1	Endothelial
1.72451e-08	0.138971	0.093	0.053	0.000631189	DMD	XPO1	Endothelial
3.29367e-07	0.138788	0.049	0.023	0.0120552	DMD	USP10	Endothelial
4.72255e-10	0.13876	0.082	0.042	1.7285e-05	DMD	THSD1	Endothelial
5.23036e-11	0.138738	0.145	0.087	1.91436e-06	DMD	TNRC6C	Endothelial
3.97638e-09	0.138234	0.083	0.044	0.000145539	DMD	PARP9	Endothelial
9.77157e-11	0.138112	0.172	0.11	3.57649e-06	DMD	NAALADL2	Endothelial
4.78194e-08	0.137825	0.107	0.066	0.00175024	DMD	TPM3	Endothelial
2.66192e-09	0.137164	0.091	0.05	9.74288e-05	DMD	HTT	Endothelial
1.537e-07	0.136918	0.082	0.048	0.00562556	DMD	SLF2	Endothelial
8.46457e-08	0.136683	0.062	0.031	0.00309812	DMD	AGBL3	Endothelial
9.78804e-13	0.136647	0.116	0.06	3.58252e-08	DMD	PUM3	Endothelial
3.26779e-07	0.136599	0.057	0.029	0.0119605	DMD	LTN1	Endothelial
1.36809e-12	0.136557	0.165	0.097	5.00734e-08	DMD	ATF7IP	Endothelial
2.88362e-10	0.136452	0.104	0.057	1.05544e-05	DMD	ANAPC5	Endothelial
1.67016e-12	0.136224	0.286	0.192	6.11295e-08	DMD	ETV6	Endothelial
1.02439e-14	0.136187	0.199	0.118	3.74939e-10	DMD	PCCA	Endothelial
1.18559e-12	0.135389	0.198	0.123	4.33938e-08	DMD	WWTR1	Endothelial
1.51711e-07	0.135068	0.063	0.033	0.00555278	DMD	CERS5	Endothelial
1.17412e-17	0.135047	0.303	0.187	4.2974e-13	DMD	EIF4G3	Endothelial
2.18904e-07	0.135007	0.068	0.037	0.00801209	DMD	XIAP	Endothelial
1.21828e-07	0.134751	0.062	0.032	0.00445901	DMD	TRAPPC12	Endothelial
1.47586e-09	0.134737	0.108	0.062	5.40181e-05	DMD	MAPK14	Endothelial
8.21754e-07	0.134609	0.053	0.027	0.030077	DMD	GAK	Endothelial
4.6314e-08	0.134507	0.07	0.037	0.00169514	DMD	NCK2	Endothelial
5.05711e-10	0.133985	0.1	0.055	1.85095e-05	DMD	CD109	Endothelial
1.04595e-14	0.133886	0.165	0.092	3.82828e-10	DMD	ANKRD29	Endothelial
1.45243e-14	0.133587	0.19	0.111	5.31603e-10	DMD	RICTOR	Endothelial
3.94256e-12	0.133368	0.15	0.087	1.44302e-07	DMD	ERICH1	Endothelial
2.37273e-10	0.133094	0.08	0.039	8.68444e-06	DMD	AP001605.1	Endothelial
6.85397e-10	0.132772	0.091	0.048	2.50862e-05	DMD	PIK3C3	Endothelial
4.62997e-17	0.132638	0.253	0.152	1.69462e-12	DMD	SORBS2	Endothelial
3.14145e-07	0.132622	0.063	0.034	0.011498	DMD	CIR1	Endothelial
4.13255e-07	0.132608	0.061	0.033	0.0151255	DMD	AC005037.1	Endothelial
3.29281e-11	0.132485	0.126	0.072	1.2052e-06	DMD	SPG7	Endothelial
7.80167e-08	0.132238	0.081	0.046	0.00285549	DMD	YME1L1	Endothelial
3.78176e-12	0.132096	0.127	0.07	1.38416e-07	DMD	GPBP1L1	Endothelial
3.79125e-10	0.132016	0.194	0.128	1.38763e-05	DMD	ACER3	Endothelial
7.91208e-11	0.131897	0.107	0.058	2.8959e-06	DMD	CDC73	Endothelial
4.68777e-09	0.131789	0.088	0.048	0.000171577	DMD	ASXL2	Endothelial
7.27462e-13	0.131789	0.172	0.102	2.66258e-08	DMD	NT5C2	Endothelial
6.44923e-07	0.131637	0.04	0.018	0.0236048	DMD	NPAT	Endothelial
4.17365e-10	0.131432	0.091	0.048	1.5276e-05	DMD	MTF2	Endothelial
5.4257e-08	0.131401	0.076	0.042	0.00198586	DMD	CDK12	Endothelial
1.14934e-08	0.131261	0.105	0.062	0.00042067	DMD	SUSD6	Endothelial
2.24211e-09	0.131132	0.136	0.084	8.20633e-05	DMD	OXR1	Endothelial
1.55212e-07	0.1308	0.063	0.033	0.00568091	DMD	AC131571.1	Endothelial
1.94683e-12	0.130602	0.194	0.12	7.1256e-08	DMD	RSRP1	Endothelial
4.4927e-07	0.130586	0.065	0.036	0.0164437	DMD	PCGF3	Endothelial
1.43066e-10	0.13044	0.108	0.059	5.23637e-06	DMD	USP3	Endothelial
4.84332e-07	0.130385	0.042	0.019	0.017727	DMD	TRPM4	Endothelial
6.55768e-14	0.130293	0.223	0.138	2.40018e-09	DMD	TTC19	Endothelial
5.18695e-09	0.130225	0.109	0.064	0.000189847	DMD	TLK2	Endothelial
9.4081e-08	0.130187	0.054	0.026	0.00344346	DMD	MTERF1	Endothelial
8.86897e-09	0.130122	0.091	0.051	0.000324613	DMD	UBE2E3	Endothelial
2.49069e-08	0.130042	0.077	0.042	0.000911618	DMD	CREBRF	Endothelial
1.25956e-07	0.129516	0.059	0.03	0.00461013	DMD	EHBP1L1	Endothelial
3.95529e-14	0.12917	0.356	0.241	1.44768e-09	DMD	LPP	Endothelial
2.42945e-09	0.1291	0.195	0.131	8.89203e-05	DMD	GSE1	Endothelial
2.06028e-08	0.128773	0.11	0.067	0.000754085	DMD	SOX4	Endothelial
2.05241e-08	0.128543	0.068	0.035	0.000751204	DMD	ABCB7	Endothelial
6.14731e-07	0.128436	0.06	0.032	0.0224998	DMD	MAP3K13	Endothelial
2.09328e-11	0.128099	0.155	0.093	7.66162e-07	DMD	BTBD9	Endothelial
4.24485e-11	0.127943	0.151	0.091	1.55366e-06	DMD	OPHN1	Endothelial
2.63703e-09	0.127875	0.084	0.044	9.65181e-05	DMD	VPS35L	Endothelial
3.85628e-11	0.127752	0.14	0.082	1.41144e-06	DMD	ATXN3	Endothelial
1.12597e-07	0.127667	0.122	0.079	0.00412116	DMD	ZFP36L2	Endothelial
1.00227e-08	0.127276	0.076	0.04	0.000366841	DMD	MDN1	Endothelial
3.28587e-08	0.127216	0.091	0.052	0.00120266	DMD	APPL2	Endothelial
1.20875e-07	0.127213	0.05	0.023	0.00442414	DMD	TET3	Endothelial
3.07173e-07	0.126918	0.054	0.027	0.0112428	DMD	NARS2	Endothelial
1.2593e-12	0.126909	0.133	0.073	4.60918e-08	DMD	GIGYF2	Endothelial
7.88922e-07	0.126844	0.05	0.025	0.0288753	DMD	SLX4IP	Endothelial
1.7525e-09	0.126655	0.089	0.048	6.41434e-05	DMD	YTHDC2	Endothelial
3.15755e-09	0.126507	0.087	0.047	0.000115569	DMD	LENG8	Endothelial
5.77092e-09	0.126268	0.1	0.058	0.000211222	DMD	LRP6	Endothelial
2.04787e-11	0.126161	0.16	0.097	7.49539e-07	DMD	BRWD1	Endothelial
1.56125e-10	0.126131	0.1	0.054	5.71432e-06	DMD	PIAS2	Endothelial
4.06871e-08	0.126108	0.076	0.041	0.00148919	DMD	MAPK1	Endothelial
1.04196e-07	0.126031	0.085	0.049	0.00381368	DMD	REV1	Endothelial
1.92765e-10	0.125937	0.119	0.068	7.05539e-06	DMD	CUL3	Endothelial
4.31151e-10	0.125916	0.141	0.087	1.57806e-05	DMD	ADARB1	Endothelial
4.4392e-11	0.125845	0.152	0.091	1.62479e-06	DMD	ZNF609	Endothelial
1.34567e-09	0.125182	0.133	0.081	4.92529e-05	DMD	POU2F1	Endothelial
4.57775e-07	0.125079	0.05	0.025	0.016755	DMD	GOSR2	Endothelial
8.3009e-09	0.125021	0.125	0.077	0.000303821	DMD	POLR2B	Endothelial
3.79237e-13	0.124888	0.149	0.084	1.38804e-08	DMD	FILIP1	Endothelial
2.29691e-07	0.12482	0.069	0.038	0.00840693	DMD	SIN3B	Endothelial
1.01809e-06	0.124736	0.051	0.026	0.037263	DMD	BNIP2	Endothelial
5.5045e-11	0.124618	0.141	0.083	2.0147e-06	DMD	CENPC	Endothelial
3.67034e-07	0.124463	0.056	0.029	0.0134338	DMD	NUP58	Endothelial
1.13821e-09	0.124177	0.063	0.029	4.16595e-05	DMD	NTN4	Endothelial
3.38448e-07	0.1241	0.098	0.061	0.0123875	DMD	MSN	Endothelial
5.26774e-18	0.123927	0.268	0.159	1.92805e-13	DMD	VPS13B	Endothelial
5.76204e-10	0.123898	0.578	0.443	2.10896e-05	DMD	DOCK4	Endothelial
3.9917e-09	0.12355	0.095	0.053	0.0001461	DMD	CCDC7	Endothelial
4.12717e-07	0.123496	0.033	0.012	0.0151058	DMD	ZNF846	Endothelial
1.45652e-09	0.123458	0.086	0.045	5.33101e-05	DMD	ARFIP1	Endothelial
1.50662e-12	0.123105	0.127	0.068	5.51437e-08	DMD	KIDINS220	Endothelial
1.71965e-07	0.123082	0.044	0.019	0.00629408	DMD	TTC23	Endothelial
9.46486e-08	0.122843	0.044	0.019	0.00346423	DMD	ANAPC4	Endothelial
2.16883e-07	0.122407	0.074	0.042	0.00793815	DMD	APLP2	Endothelial
1.0489e-11	0.122215	0.246	0.163	3.83909e-07	DMD	ETS1	Endothelial
4.74347e-08	0.122132	0.089	0.051	0.00173616	DMD	BTRC	Endothelial
8.93467e-07	0.122093	0.234	0.175	0.0327018	DMD	COL4A1	Endothelial
3.79659e-12	0.121721	0.203	0.128	1.38959e-07	DMD	CBLB	Endothelial
1.90002e-09	0.121716	0.102	0.058	6.95427e-05	DMD	ABCC1	Endothelial
2.76009e-13	0.121639	0.191	0.116	1.01022e-08	DMD	PUM2	Endothelial
6.66728e-10	0.121534	0.103	0.057	2.44029e-05	DMD	SND1	Endothelial
1.34455e-07	0.121456	0.046	0.021	0.00492118	DMD	ANAPC1	Endothelial
2.71335e-14	0.121449	0.22	0.134	9.93115e-10	DMD	CSNK1A1	Endothelial
7.72852e-10	0.121392	0.102	0.057	2.82872e-05	DMD	RPAP2	Endothelial
1.94736e-12	0.121313	0.134	0.074	7.12754e-08	DMD	XRCC5	Endothelial
1.7694e-09	0.121224	0.091	0.05	6.47617e-05	DMD	FOXK2	Endothelial
1.72563e-13	0.121038	0.149	0.083	6.31596e-09	DMD	PUM1	Endothelial
4.94618e-10	0.120904	0.095	0.051	1.81035e-05	DMD	CASP4	Endothelial
1.8189e-08	0.120019	0.097	0.057	0.000665735	DMD	EPSTI1	Endothelial
7.83945e-07	0.119927	0.057	0.03	0.0286932	DMD	ACBD3	Endothelial
2.30961e-08	0.119673	0.062	0.03	0.000845341	DMD	SUPT20H	Endothelial
6.5855e-08	0.119631	0.075	0.041	0.00241036	DMD	DDX60	Endothelial
3.84578e-10	0.119604	0.108	0.06	1.40759e-05	DMD	UBAC2	Endothelial
8.57025e-09	0.119604	0.099	0.057	0.00031368	DMD	OPA1	Endothelial
1.71283e-07	0.119526	0.074	0.042	0.00626911	DMD	UBE2Q2	Endothelial
4.40405e-11	0.11942	0.105	0.056	1.61193e-06	DMD	IL3RA	Endothelial
8.25593e-07	0.119392	0.055	0.029	0.0302175	DMD	STX18	Endothelial
1.05806e-06	0.119042	0.053	0.028	0.0387262	DMD	LEMD3	Endothelial
3.10564e-08	0.118896	0.116	0.072	0.00113669	DMD	ECPAS	Endothelial
2.11545e-09	0.118874	0.064	0.03	7.74276e-05	DMD	RFTN2	Endothelial
1.57557e-09	0.11885	0.118	0.07	5.76673e-05	DMD	ANXA4	Endothelial
3.84084e-09	0.118833	0.113	0.066	0.000140579	DMD	FOCAD	Endothelial
8.71496e-11	0.118563	0.122	0.069	3.18976e-06	DMD	ABI1	Endothelial
6.18794e-13	0.118496	0.276	0.182	2.26485e-08	DMD	ASH1L	Endothelial
6.20724e-08	0.118083	0.074	0.041	0.00227191	DMD	TM9SF2	Endothelial
2.23981e-12	0.117953	0.124	0.066	8.19793e-08	DMD	SGK3	Endothelial
8.19323e-07	0.117921	0.058	0.031	0.029988	DMD	QRICH1	Endothelial
7.92046e-12	0.117812	0.145	0.084	2.89897e-07	DMD	HIBCH	Endothelial
4.44343e-07	0.11777	0.076	0.044	0.0162634	DMD	NOL10	Endothelial
3.39533e-09	0.117655	0.123	0.074	0.000124273	DMD	CSPP1	Endothelial
9.66771e-09	0.11743	0.216	0.153	0.000353848	DMD	AL583785.1	Endothelial
3.04197e-10	0.117309	0.112	0.063	1.11339e-05	DMD	RAMP3	Endothelial
9.73749e-07	0.1173	0.056	0.029	0.0356402	DMD	ODR4	Endothelial
8.69599e-14	0.117252	0.245	0.155	3.18282e-09	DMD	NCOR1	Endothelial
9.30968e-13	0.11698	0.128	0.069	3.40744e-08	DMD	EEF2K	Endothelial
6.66137e-16	0.116956	0.279	0.173	2.43813e-11	DMD	ANKRD17	Endothelial
1.74839e-08	0.116953	0.065	0.032	0.000639928	DMD	VPS39	Endothelial
3.73389e-18	0.116949	0.348	0.22	1.36664e-13	DMD	MBD5	Endothelial
5.64968e-07	0.116741	0.056	0.029	0.0206784	DMD	GALNT2	Endothelial
1.45879e-07	0.116545	0.082	0.048	0.00533932	DMD	KDM5A	Endothelial
2.05546e-12	0.116525	0.137	0.077	7.5232e-08	DMD	ATF7	Endothelial
1.8181e-08	0.116409	0.098	0.058	0.000665443	DMD	MVB12B	Endothelial
5.22778e-09	0.11619	0.105	0.061	0.000191342	DMD	PELI1	Endothelial
8.59898e-08	0.116085	0.063	0.032	0.00314731	DMD	OTUD4	Endothelial
7.60135e-07	0.115856	0.098	0.062	0.0278217	DMD	PI4KA	Endothelial
2.50035e-07	0.115805	0.058	0.03	0.00915153	DMD	CHFR	Endothelial
3.00091e-07	0.115516	0.067	0.037	0.0109836	DMD	MMS19	Endothelial
4.53905e-11	0.115483	0.171	0.106	1.66134e-06	DMD	SRSF4	Endothelial
4.51155e-09	0.115365	0.07	0.035	0.000165127	DMD	FAXDC2	Endothelial
1.01992e-10	0.115364	0.133	0.078	3.733e-06	DMD	TRPC4AP	Endothelial
2.03924e-07	0.115253	0.057	0.029	0.00746384	DMD	CEPT1	Endothelial
2.19038e-08	0.115087	0.115	0.071	0.0008017	DMD	CCNL1	Endothelial
4.94143e-07	0.114853	0.084	0.051	0.0180861	DMD	UBP1	Endothelial
1.52309e-07	0.114568	0.07	0.038	0.00557466	DMD	DCP2	Endothelial
3.02999e-09	0.114341	0.09	0.05	0.000110901	DMD	CLTC	Endothelial
4.9798e-08	0.114273	0.068	0.036	0.00182266	DMD	PACS2	Endothelial
2.5052e-07	0.114119	0.077	0.044	0.0091693	DMD	SLC25A12	Endothelial
4.15701e-14	0.114045	0.172	0.099	1.52151e-09	DMD	PRRC2C	Endothelial
2.53342e-13	0.113837	0.162	0.093	9.27257e-09	DMD	UBR5	Endothelial
9.30814e-08	0.113808	0.065	0.034	0.00340687	DMD	MPZL1	Endothelial
1.33691e-11	0.113775	0.109	0.058	4.89322e-07	DMD	TET2	Endothelial
1.83746e-07	0.11364	0.088	0.052	0.00672527	DMD	BCLAF1	Endothelial
5.77906e-10	0.113549	0.092	0.049	2.11519e-05	DMD	AMBRA1	Endothelial
4.60255e-07	0.113049	0.059	0.031	0.0168458	DMD	ZBTB44	Endothelial
4.37365e-08	0.112899	0.097	0.058	0.0016008	DMD	SGMS1	Endothelial
1.25828e-07	0.112776	0.109	0.069	0.00460545	DMD	ACYP2	Endothelial
4.87563e-11	0.112449	0.138	0.081	1.78453e-06	DMD	ASXL1	Endothelial
1.92586e-09	0.112429	0.132	0.081	7.04884e-05	DMD	ANKRD11	Endothelial
4.5566e-08	0.112377	0.049	0.022	0.00166776	DMD	DROSHA	Endothelial
5.18144e-07	0.112355	0.063	0.035	0.0189646	DMD	DRG1	Endothelial
9.39576e-14	0.112169	0.178	0.103	3.43894e-09	DMD	ACACB	Endothelial
1.17718e-07	0.111839	0.089	0.053	0.00430861	DMD	AEBP2	Endothelial
2.5289e-07	0.111762	0.089	0.053	0.00925604	DMD	AC018362.1	Endothelial
1.56328e-13	0.111501	0.24	0.153	5.72175e-09	DMD	PRKN	Endothelial
1.70238e-08	0.111402	0.076	0.04	0.000623087	DMD	RHOT1	Endothelial
1.82827e-07	0.111296	0.065	0.035	0.00669164	DMD	FBXO25	Endothelial
2.02214e-07	0.111219	0.063	0.033	0.00740122	DMD	ITGB3BP	Endothelial
6.37556e-08	0.11113	0.098	0.059	0.00233352	DMD	SREK1	Endothelial
9.88857e-09	0.111076	0.126	0.078	0.000361932	DMD	CGGBP1	Endothelial
3.9394e-11	0.110866	0.107	0.058	1.44186e-06	DMD	KHDRBS1	Endothelial
2.10608e-08	0.110858	0.091	0.052	0.000770848	DMD	MTMR3	Endothelial
7.296e-11	0.11081	0.142	0.084	2.67041e-06	DMD	MGMT	Endothelial
3.44141e-07	0.110508	0.051	0.025	0.0125959	DMD	AL138689.2	Endothelial
1.20688e-08	0.110304	0.097	0.056	0.000441731	DMD	ZNF518A	Endothelial
6.04178e-10	0.110242	0.091	0.048	2.21135e-05	DMD	SNX13	Endothelial
1.12854e-06	0.110205	0.049	0.025	0.0413057	DMD	SLC9A8	Endothelial
1.12204e-09	0.110198	0.147	0.092	4.10678e-05	DMD	SRRM2	Endothelial
1.04958e-12	0.10972	0.225	0.143	3.84158e-08	DMD	NR3C2	Endothelial
5.73264e-07	0.109716	0.049	0.024	0.020982	DMD	TAMM41	Endothelial
5.67197e-08	0.109586	0.083	0.047	0.002076	DMD	BRWD3	Endothelial
6.80144e-09	0.109207	0.105	0.062	0.000248939	DMD	ZFAND6	Endothelial
3.18375e-07	0.109152	0.074	0.042	0.0116528	DMD	SLC39A11	Endothelial
7.7822e-13	0.108591	0.182	0.11	2.84836e-08	DMD	TENT2	Endothelial
4.84893e-07	0.108511	0.046	0.022	0.0177476	DMD	CSNK1D	Endothelial
1.16003e-08	0.108205	0.093	0.052	0.000424582	DMD	ST3GAL3	Endothelial
5.17632e-08	0.108107	0.079	0.044	0.00189458	DMD	CSDE1	Endothelial
1.32852e-06	0.107629	0.057	0.03	0.048625	DMD	CLNS1A	Endothelial
3.51131e-07	0.10758	0.076	0.044	0.0128518	DMD	SEPTIN10	Endothelial
8.54545e-07	0.10727	0.055	0.029	0.0312772	DMD	CCDC69	Endothelial
8.32976e-08	0.106918	0.132	0.086	0.00304878	DMD	PDE10A	Endothelial
1.84847e-07	0.106477	0.085	0.05	0.0067656	DMD	FAM120A	Endothelial
4.46507e-09	0.105979	0.066	0.032	0.000163426	DMD	RPGR	Endothelial
5.63596e-07	0.105959	0.06	0.032	0.0206282	DMD	DNAJB6	Endothelial
1.02626e-06	0.105937	0.071	0.041	0.0375621	DMD	GCNT1	Endothelial
1.14658e-06	0.105841	0.073	0.043	0.0419661	DMD	ATL2	Endothelial
4.08633e-10	0.105604	0.121	0.07	1.49564e-05	DMD	SEPTIN2	Endothelial
9.8639e-16	0.105557	0.243	0.147	3.61029e-11	DMD	ARHGEF12	Endothelial
1.35725e-06	0.105532	0.034	0.014	0.0496766	DMD	IFT74	Endothelial
6.96672e-07	0.105456	0.058	0.031	0.0254989	DMD	METTL16	Endothelial
1.21954e-07	0.105442	0.066	0.035	0.00446364	DMD	ERGIC2	Endothelial
1.55255e-12	0.10544	0.182	0.11	5.68249e-08	DMD	CLASP2	Endothelial
2.16855e-11	0.105418	0.109	0.058	7.9371e-07	DMD	ACBD6	Endothelial
2.53759e-07	0.105356	0.081	0.047	0.00928783	DMD	AP000787.1	Endothelial
4.70071e-11	0.105318	0.184	0.116	1.72051e-06	DMD	TSPAN9	Endothelial
6.37912e-08	0.105216	0.071	0.038	0.00233482	DMD	CD302	Endothelial
1.8921e-08	0.105159	0.075	0.04	0.000692526	DMD	SEC63	Endothelial
3.07359e-13	0.105049	0.235	0.15	1.12497e-08	DMD	PIBF1	Endothelial
2.5467e-09	0.10463	0.083	0.044	9.32119e-05	DMD	LNPEP	Endothelial
2.26074e-07	0.104567	0.09	0.054	0.00827453	DMD	RBM17	Endothelial
1.35163e-10	0.104546	0.273	0.188	4.94709e-06	DMD	MEOX2	Endothelial
3.40035e-07	0.104355	0.059	0.031	0.0124456	DMD	DNMBP	Endothelial
3.99674e-11	0.104343	0.11	0.06	1.46285e-06	DMD	GPD2	Endothelial
1.22044e-11	0.104172	0.164	0.098	4.46694e-07	DMD	VGLL4	Endothelial
1.09825e-15	0.104138	0.3	0.191	4.01969e-11	DMD	MBNL2	Endothelial
2.35491e-09	0.103492	0.112	0.066	8.61919e-05	DMD	ZDHHC21	Endothelial
1.29511e-08	0.10347	0.092	0.052	0.000474024	DMD	VPS50	Endothelial
1.47081e-08	0.103382	0.135	0.086	0.00053833	DMD	CYSTM1	Endothelial
5.54538e-08	0.103365	0.07	0.037	0.00202966	DMD	ARHGAP12	Endothelial
1.26497e-06	0.103251	0.057	0.031	0.046299	DMD	MSH2	Endothelial
1.69737e-09	0.103186	0.134	0.082	6.21255e-05	DMD	MARCH7	Endothelial
1.09593e-06	0.102513	0.049	0.025	0.0401121	DMD	FPGT	Endothelial
5.49503e-08	0.102383	0.082	0.046	0.00201124	DMD	HNRNPR	Endothelial
3.14985e-08	0.101991	0.097	0.057	0.00115288	DMD	ATP11B	Endothelial
2.58855e-10	0.101883	0.139	0.084	9.47436e-06	DMD	SWAP70	Endothelial
2.36232e-07	0.101849	0.101	0.062	0.00864634	DMD	GASK1B	Endothelial
3.88399e-11	0.101843	0.223	0.148	1.42158e-06	DMD	DLG2	Endothelial
7.28111e-10	0.10138	0.133	0.081	2.66496e-05	DMD	LARP4B	Endothelial
4.45424e-11	0.1013	0.154	0.093	1.6303e-06	DMD	PDS5B	Endothelial
3.08907e-07	0.101253	0.071	0.039	0.0113063	DMD	MAP3K7	Endothelial
1.85396e-07	0.100829	0.074	0.041	0.0067857	DMD	SPOP	Endothelial
1.10986e-07	0.1008	0.062	0.032	0.00406219	DMD	PLEKHM3	Endothelial
4.84969e-12	0.100715	0.118	0.064	1.77503e-07	DMD	NSD1	Endothelial
1.05382e-06	0.100702	0.072	0.042	0.0385708	DMD	ZXDC	Endothelial
7.65456e-07	0.100624	0.064	0.036	0.0280165	DMD	G3BP1	Endothelial
1.19503e-09	0.100265	0.133	0.081	4.37394e-05	DMD	UHRF2	Endothelial
3.16121e-12	0.0998653	0.144	0.082	1.15703e-07	DMD	LINC01473	Endothelial
1.21214e-07	0.0998348	0.079	0.045	0.00443654	DMD	ATG5	Endothelial
8.37711e-08	0.0997183	0.085	0.049	0.00306611	DMD	BCAR3	Endothelial
1.15206e-12	0.0995009	0.206	0.128	4.21667e-08	DMD	PPP1R12A	Endothelial
2.15692e-10	0.0994394	0.131	0.077	7.89454e-06	DMD	SIK2	Endothelial
4.63469e-07	0.099355	0.067	0.037	0.0169634	DMD	UBN1	Endothelial
1.56223e-09	0.0992085	0.077	0.039	5.71791e-05	DMD	CD55	Endothelial
2.95598e-08	0.0991922	0.099	0.059	0.00108192	DMD	FAM13B	Endothelial
2.28055e-14	0.0990116	0.206	0.122	8.34703e-10	DMD	ZCCHC7	Endothelial
4.72253e-13	0.0989882	0.203	0.125	1.72849e-08	DMD	HDAC8	Endothelial
8.04748e-11	0.0988831	0.198	0.127	2.94546e-06	DMD	DYRK1A	Endothelial
7.68386e-11	0.0988374	0.148	0.088	2.81237e-06	DMD	TASOR2	Endothelial
5.80957e-10	0.0987854	0.399	0.294	2.12636e-05	DMD	IGFBP7	Endothelial
3.01252e-11	0.0985894	0.199	0.126	1.10261e-06	DMD	MLLT10	Endothelial
4.34578e-11	0.0977532	0.141	0.083	1.5906e-06	DMD	SHPRH	Endothelial
1.03665e-08	0.0976692	0.101	0.059	0.000379425	DMD	GARS-DT	Endothelial
1.18396e-07	0.0975803	0.084	0.048	0.0043334	DMD	TPK1	Endothelial
5.67699e-07	0.0974948	0.069	0.039	0.0207784	DMD	INKA2	Endothelial
1.15024e-10	0.0973821	0.108	0.059	4.20999e-06	DMD	AL359220.1	Endothelial
1.00363e-10	0.0973692	0.109	0.059	3.67339e-06	DMD	MIS18BP1	Endothelial
1.79234e-07	0.0973332	0.061	0.031	0.00656016	DMD	MGA	Endothelial
4.97598e-08	0.0971863	0.125	0.08	0.00182126	DMD	PPP3R1	Endothelial
3.45327e-10	0.0971793	0.136	0.081	1.26393e-05	DMD	EML4	Endothelial
7.01461e-08	0.0970447	0.102	0.062	0.00256742	DMD	WDR11	Endothelial
5.01869e-10	0.0967895	0.117	0.067	1.83689e-05	DMD	HELZ	Endothelial
3.46266e-10	0.0966546	0.125	0.073	1.26737e-05	DMD	MARCH6	Endothelial
5.19645e-13	0.0966193	0.189	0.115	1.90195e-08	DMD	ZSWIM6	Endothelial
1.91615e-10	0.0963772	0.221	0.147	7.0133e-06	DMD	PLXND1	Endothelial
2.30055e-11	0.0962592	0.11	0.059	8.42025e-07	DMD	TMEM245	Endothelial
2.50262e-10	0.0961846	0.102	0.055	9.15986e-06	DMD	DPP8	Endothelial
2.83683e-09	0.0961156	0.119	0.071	0.000103831	DMD	MNAT1	Endothelial
4.73984e-07	0.0959045	0.074	0.043	0.0173483	DMD	EIF3A	Endothelial
2.01129e-13	0.0956214	0.192	0.115	7.36154e-09	DMD	ZNF292	Endothelial
3.05238e-08	0.0953261	0.102	0.061	0.0011172	DMD	RGS3	Endothelial
5.38414e-12	0.0952924	0.191	0.119	1.97065e-07	DMD	TCF7L2	Endothelial
1.09496e-06	0.0952282	0.079	0.047	0.0400766	DMD	ATP1B3	Endothelial
1.64088e-08	0.0952131	0.058	0.027	0.00060058	DMD	DTWD1	Endothelial
7.39394e-12	0.0951967	0.144	0.083	2.70626e-07	DMD	ODF2L	Endothelial
3.60843e-08	0.0946939	0.077	0.042	0.00132072	DMD	SLC35F5	Endothelial
1.362e-06	0.0942979	0.073	0.043	0.0498506	DMD	S100PBP	Endothelial
3.51046e-11	0.0940738	0.141	0.083	1.28486e-06	DMD	SMG6	Endothelial
7.76412e-10	0.0937316	0.16	0.101	2.84175e-05	DMD	ZMIZ1	Endothelial
1.91959e-07	0.0937169	0.063	0.033	0.00702589	DMD	CNTRL	Endothelial
3.00016e-09	0.0935617	0.16	0.103	0.000109809	DMD	NEMF	Endothelial
7.49052e-07	0.0932042	0.056	0.029	0.0274161	DMD	SAMD4B	Endothelial
3.53751e-09	0.0931248	0.101	0.058	0.000129476	DMD	USP8	Endothelial
3.94458e-07	0.0930497	0.07	0.039	0.0144376	DMD	INTS10	Endothelial
5.7919e-10	0.0930291	0.125	0.074	2.11989e-05	DMD	CDC42BPB	Endothelial
1.14895e-07	0.0930167	0.087	0.051	0.00420528	DMD	STX16	Endothelial
2.03094e-11	0.0929493	0.136	0.078	7.43345e-07	DMD	DENND1A	Endothelial
6.48472e-08	0.0929409	0.081	0.046	0.00237347	DMD	AK9	Endothelial
4.89565e-13	0.0927699	0.166	0.096	1.79186e-08	DMD	FOXJ3	Endothelial
4.13159e-08	0.09246	0.093	0.054	0.0015122	DMD	AP2A2	Endothelial
1.48047e-07	0.0921851	0.089	0.052	0.00541867	DMD	MIER1	Endothelial
1.05132e-12	0.0920615	0.188	0.114	3.84795e-08	DMD	HNRNPA2B1	Endothelial
4.22458e-12	0.0916981	0.169	0.101	1.54624e-07	DMD	AP3B1	Endothelial
3.65504e-08	0.0913677	0.092	0.053	0.00133778	DMD	ZFYVE16	Endothelial
1.25599e-11	0.0909962	0.238	0.156	4.59707e-07	DMD	SNHG14	Endothelial
1.20219e-07	0.0909252	0.086	0.05	0.00440015	DMD	STX7	Endothelial
3.02694e-08	0.0908969	0.096	0.057	0.00110789	DMD	ZNF654	Endothelial
3.9292e-07	0.0906714	0.107	0.068	0.0143813	DMD	ARID4A	Endothelial
2.59166e-07	0.0904877	0.091	0.055	0.00948573	DMD	RALGAPB	Endothelial
1.32974e-10	0.0903526	0.196	0.127	4.86699e-06	DMD	HDAC7	Endothelial
1.5219e-09	0.090163	0.136	0.083	5.5703e-05	DMD	TBCK	Endothelial
3.81168e-15	0.0898331	0.179	0.101	1.39511e-10	DMD	OGA	Endothelial
7.4319e-08	0.0897162	0.089	0.051	0.00272015	DMD	CDK19	Endothelial
1.76259e-07	0.0896778	0.078	0.044	0.00645124	DMD	EFCAB2	Endothelial
6.34101e-08	0.0895572	0.112	0.07	0.00232087	DMD	PPP4R1	Endothelial
8.42741e-08	0.0892925	0.101	0.061	0.00308452	DMD	CPSF6	Endothelial
9.89681e-07	0.0891417	0.07	0.04	0.0362233	DMD	DHRSX	Endothelial
3.12945e-12	0.0888947	0.212	0.134	1.14541e-07	DMD	FBXL17	Endothelial
1.68571e-13	0.0888216	0.246	0.155	6.16985e-09	DMD	SOS1	Endothelial
1.55798e-10	0.088554	0.148	0.09	5.70235e-06	DMD	KLC1	Endothelial
1.53356e-10	0.0885456	0.121	0.069	5.61297e-06	DMD	FBXL20	Endothelial
1.35948e-06	0.0883979	0.078	0.047	0.0497583	DMD	NDEL1	Endothelial
1.87742e-08	0.0878415	0.09	0.051	0.000687153	DMD	PSMA3	Endothelial
6.36524e-09	0.0872049	0.108	0.063	0.000232974	DMD	PIP4K2A	Endothelial
9.05853e-07	0.0871838	0.063	0.035	0.0331551	DMD	WDR59	Endothelial
1.85802e-07	0.0870437	0.095	0.058	0.00680053	DMD	BAZ1A	Endothelial
7.76344e-09	0.086994	0.135	0.084	0.00028415	DMD	MRTFA	Endothelial
1.11319e-06	0.0867123	0.053	0.027	0.0407439	DMD	TMEM260	Endothelial
1.62914e-07	0.0866114	0.084	0.049	0.0059628	DMD	ERCC6L2	Endothelial
4.29564e-09	0.086362	0.167	0.109	0.000157225	DMD	ASAP2	Endothelial
3.06379e-12	0.0859573	0.187	0.114	1.12138e-07	DMD	PHF21A	Endothelial
2.37682e-07	0.0854568	0.11	0.069	0.00869941	DMD	CPD	Endothelial
2.4184e-10	0.0854385	0.107	0.059	8.85159e-06	DMD	CCAR1	Endothelial
1.75128e-10	0.0852899	0.143	0.086	6.40987e-06	DMD	UBE2K	Endothelial
5.91871e-07	0.0852735	0.078	0.045	0.0216631	DMD	WDR26	Endothelial
4.33453e-07	0.0852012	0.096	0.059	0.0158648	DMD	HNRNPM	Endothelial
2.53373e-08	0.0850191	0.081	0.044	0.000927369	DMD	FAM193B	Endothelial
1.14532e-10	0.0850164	0.125	0.072	4.19197e-06	DMD	YTHDC1	Endothelial
4.53194e-12	0.0842089	0.183	0.112	1.65874e-07	DMD	DYM	Endothelial
7.08266e-07	0.0841169	0.058	0.031	0.0259232	DMD	AC104806.2	Endothelial
4.34159e-09	0.0838651	0.148	0.095	0.000158906	DMD	LARGE1	Endothelial
8.07417e-07	0.0836529	0.063	0.035	0.0295523	DMD	AC078883.1	Endothelial
7.90643e-11	0.0835811	0.156	0.095	2.89383e-06	DMD	FBXW7	Endothelial
6.43026e-07	0.0834554	0.08	0.047	0.0235354	DMD	FRS2	Endothelial
5.54737e-07	0.0833675	0.057	0.029	0.0203039	DMD	MTIF3	Endothelial
4.74899e-09	0.0832306	0.089	0.049	0.000173818	DMD	ZZEF1	Endothelial
1.04525e-11	0.083147	0.189	0.118	3.82573e-07	DMD	FCHO2	Endothelial
4.55007e-07	0.0829295	0.078	0.045	0.0166537	DMD	MSI2	Endothelial
8.72026e-08	0.0824984	0.129	0.084	0.0031917	DMD	SCFD1	Endothelial
3.65339e-07	0.0823912	0.063	0.034	0.0133718	DMD	RAD9A	Endothelial
1.74698e-07	0.082385	0.068	0.037	0.00639413	DMD	HEXA	Endothelial
8.30464e-08	0.0823722	0.114	0.071	0.00303958	DMD	PPP2R5E	Endothelial
5.42254e-07	0.0823217	0.07	0.04	0.019847	DMD	PRIM2	Endothelial
8.10266e-07	0.08217	0.06	0.033	0.0296565	DMD	ANKFY1	Endothelial
8.56177e-08	0.0818313	0.092	0.054	0.00313369	DMD	FAM193A	Endothelial
6.56396e-08	0.0818158	0.098	0.059	0.00240247	DMD	PTPN4	Endothelial
1.41788e-08	0.0817688	0.104	0.061	0.00051896	DMD	CTDSPL2	Endothelial
4.23138e-08	0.081624	0.12	0.075	0.00154873	DMD	DCAF6	Endothelial
6.49602e-10	0.0813036	0.272	0.19	2.37761e-05	DMD	AAK1	Endothelial
5.97822e-08	0.0812977	0.094	0.055	0.00218809	DMD	SLC25A36	Endothelial
1.23816e-12	0.0811861	0.155	0.089	4.53178e-08	DMD	VEZT	Endothelial
4.24178e-07	0.0809978	0.084	0.05	0.0155253	DMD	TFDP2	Endothelial
4.54964e-08	0.0808732	0.069	0.037	0.00166522	DMD	PIGN	Endothelial
6.02678e-07	0.0805456	0.095	0.059	0.0220586	DMD	DNM2	Endothelial
2.90746e-12	0.080514	0.198	0.122	1.06416e-07	DMD	SENP6	Endothelial
3.87898e-12	0.0805051	0.193	0.119	1.41974e-07	DMD	DLG1	Endothelial
1.62204e-07	0.0801114	0.092	0.055	0.00593683	DMD	SUPT3H	Endothelial
9.97472e-09	0.0799932	0.087	0.048	0.000365085	DMD	PILRB	Endothelial
6.85641e-08	0.0797238	0.307	0.228	0.00250951	DMD	DST	Endothelial
3.89548e-07	0.0791953	0.113	0.073	0.0142578	DMD	PTBP3	Endothelial
5.62662e-12	0.0791144	0.147	0.085	2.0594e-07	DMD	CNOT2	Endothelial
5.43546e-08	0.079034	0.08	0.044	0.00198943	DMD	CHIC2	Endothelial
4.8924e-07	0.0789949	0.078	0.045	0.0179067	DMD	PRRG1	Endothelial
4.90927e-08	0.07839	0.101	0.061	0.00179684	DMD	TNPO1	Endothelial
4.89968e-07	0.0778611	0.1	0.063	0.0179333	DMD	INPP5D	Endothelial
1.72015e-10	0.0777604	0.654	0.498	6.29592e-06	DMD	LRMDA	Endothelial
3.57506e-07	0.0772737	0.083	0.05	0.0130851	DMD	LIMK2	Endothelial
2.05018e-09	0.0762804	0.162	0.104	7.50388e-05	DMD	AC027097.2	Endothelial
1.06721e-06	0.0758701	0.067	0.038	0.0390608	DMD	GFM1	Endothelial
1.46852e-11	0.0758453	0.222	0.144	5.37493e-07	DMD	PRKCE	Endothelial
1.89109e-08	0.0756141	0.08	0.043	0.000692158	DMD	KLF8	Endothelial
1.18154e-07	0.0753492	0.744	0.619	0.00432455	DMD	EMCN	Endothelial
4.50839e-12	0.0750882	0.162	0.096	1.65011e-07	DMD	POGZ	Endothelial
1.14681e-07	0.0749619	0.077	0.043	0.00419745	DMD	SMARCAD1	Endothelial
5.42227e-07	0.0745888	0.064	0.035	0.019846	DMD	FOXN2	Endothelial
1.94807e-10	0.0743865	0.202	0.132	7.13014e-06	DMD	RNF213	Endothelial
2.06107e-08	0.0743542	0.13	0.082	0.000754371	DMD	UPF2	Endothelial
6.62596e-12	0.073731	0.224	0.144	2.42517e-07	DMD	FBXO11	Endothelial
2.5875e-12	0.073556	0.202	0.125	9.47053e-08	DMD	KIAA1109	Endothelial
2.56644e-08	0.0733475	0.085	0.048	0.000939344	DMD	USP48	Endothelial
4.93999e-07	0.0729347	0.08	0.047	0.0180808	DMD	ARID1A	Endothelial
8.52503e-07	0.0728342	0.085	0.051	0.0312025	DMD	N4BP1	Endothelial
1.33064e-07	0.0726021	0.102	0.063	0.00487029	DMD	TBC1D8	Endothelial
6.27203e-09	0.0723579	0.127	0.079	0.000229563	DMD	SPECC1L	Endothelial
7.66493e-08	0.0723123	0.104	0.063	0.00280544	DMD	SMURF1	Endothelial
8.006e-13	0.0722738	0.156	0.09	2.93028e-08	DMD	WDR70	Endothelial
5.0622e-11	0.0720867	0.183	0.115	1.85281e-06	DMD	SDCCAG8	Endothelial
6.38107e-07	0.0719802	0.056	0.029	0.0233553	DMD	KLHDC1	Endothelial
1.87973e-11	0.0719135	0.397	0.281	6.88001e-07	DMD	TCF12	Endothelial
1.90516e-08	0.0716056	0.126	0.079	0.000697306	DMD	OSMR	Endothelial
1.15944e-08	0.0715552	0.113	0.068	0.000424367	DMD	RABGEF1	Endothelial
6.87869e-14	0.071368	0.234	0.145	2.51767e-09	DMD	TMOD3	Endothelial
6.60116e-08	0.0713187	0.186	0.128	0.00241609	DMD	RASGRP3	Endothelial
5.4436e-09	0.0712924	0.236	0.164	0.000199241	DMD	MAP4K3	Endothelial
6.44391e-08	0.071113	0.075	0.041	0.00235854	DMD	TRAPPC8	Endothelial
1.33689e-10	0.0710857	0.126	0.073	4.89314e-06	DMD	FAR1	Endothelial
1.1366e-06	0.0710304	0.042	0.02	0.0416009	DMD	SLC25A17	Endothelial
7.01073e-08	0.0706975	0.075	0.041	0.002566	DMD	GOLPH3	Endothelial
1.18464e-06	0.0705422	0.059	0.032	0.043359	DMD	PSMF1	Endothelial
8.84279e-08	0.0703177	0.073	0.039	0.00323655	DMD	TVP23C	Endothelial
1.40364e-12	0.0702255	0.252	0.163	5.13747e-08	DMD	RASA1	Endothelial
1.29615e-09	0.0700111	0.096	0.052	4.74405e-05	DMD	FXR1	Endothelial
1.05304e-06	0.0696181	0.076	0.044	0.0385423	DMD	CLTA	Endothelial
9.61922e-08	0.0695333	0.107	0.066	0.00352073	DMD	MYH10	Endothelial
6.79642e-12	0.0694477	0.28	0.188	2.48756e-07	DMD	ATP8B1	Endothelial
2.13793e-10	0.0694165	0.226	0.152	7.82503e-06	DMD	SSH2	Endothelial
6.17368e-11	0.0692935	0.147	0.088	2.25963e-06	DMD	BBX	Endothelial
2.24938e-13	0.0692785	0.195	0.117	8.23295e-09	DMD	ARID4B	Endothelial
6.28687e-15	0.068683	0.471	0.321	2.30106e-10	DMD	PRKCH	Endothelial
8.88663e-07	0.0678976	0.04	0.018	0.0325259	DMD	IGF2BP2	Endothelial
2.12937e-07	0.0674106	0.089	0.053	0.00779369	DMD	TNNI1	Endothelial
8.70187e-09	0.0673596	0.143	0.09	0.000318497	DMD	POLK	Endothelial
9.61945e-07	0.0672833	0.087	0.054	0.0352082	DMD	SNX25	Endothelial
2.72356e-08	0.0672282	0.137	0.088	0.000996852	DMD	FMNL2	Endothelial
3.63658e-09	0.0669322	0.095	0.053	0.000133102	DMD	TFCP2	Endothelial
1.03575e-09	0.0663989	0.17	0.109	3.79097e-05	DMD	TBL1XR1	Endothelial
4.86616e-11	0.06636	0.168	0.103	1.78106e-06	DMD	LONP2	Endothelial
1.60764e-08	0.0663206	0.075	0.04	0.000588413	DMD	TAF2	Endothelial
3.76136e-08	0.0657689	0.092	0.053	0.00137669	DMD	DENND6A	Endothelial
1.64796e-08	0.0657464	0.124	0.077	0.00060317	DMD	ETS2	Endothelial
1.7468e-09	0.0656707	0.131	0.08	6.39348e-05	DMD	TJP2	Endothelial
1.71422e-09	0.0655017	0.14	0.086	6.27423e-05	DMD	MDM4	Endothelial
2.31854e-07	0.065356	0.083	0.048	0.00848608	DMD	ANKRD13C	Endothelial
2.54441e-09	0.0653018	0.115	0.068	9.31278e-05	DMD	OSBPL9	Endothelial
2.42254e-10	0.0651164	0.156	0.096	8.86672e-06	DMD	TCF25	Endothelial
5.73623e-16	0.0650978	0.228	0.133	2.09952e-11	DMD	HERC2	Endothelial
4.47458e-07	0.0650525	0.07	0.039	0.0163774	DMD	ATG2B	Endothelial
3.41765e-07	0.064996	0.096	0.059	0.0125089	DMD	STXBP1	Endothelial
9.29766e-09	0.0648746	0.093	0.052	0.000340304	DMD	AMOTL1	Endothelial
2.21188e-11	0.0645866	0.229	0.149	8.09569e-07	DMD	RBMS1	Endothelial
2.59497e-15	0.0645658	0.215	0.125	9.49784e-11	DMD	SENP7	Endothelial
2.6342e-13	0.0641975	0.304	0.202	9.64144e-09	DMD	DNM3	Endothelial
5.50106e-11	0.0641585	0.164	0.1	2.01344e-06	DMD	RAP1B	Endothelial
2.80549e-07	0.0640724	0.08	0.047	0.0102684	DMD	MIA2	Endothelial
2.00473e-07	0.0638783	0.108	0.067	0.00733752	DMD	USP53	Endothelial
2.07531e-07	0.0637968	0.104	0.065	0.00759585	DMD	HUWE1	Endothelial
3.19158e-09	0.0636978	0.131	0.081	0.000116815	DMD	ITCH	Endothelial
6.18318e-13	0.0635477	0.217	0.135	2.26311e-08	DMD	VPS13C	Endothelial
3.23712e-10	0.0631275	0.125	0.072	1.18482e-05	DMD	DDX58	Endothelial
2.56497e-09	0.0629256	0.147	0.092	9.38806e-05	DMD	ZNF644	Endothelial
2.04681e-09	0.0627782	0.11	0.063	7.49153e-05	DMD	ATF6	Endothelial
4.83621e-08	0.0626591	0.094	0.055	0.0017701	DMD	LINC01184	Endothelial
3.43441e-09	0.0623866	0.143	0.089	0.000125703	DMD	ASB3	Endothelial
1.26399e-06	0.0623702	0.059	0.032	0.0462632	DMD	IP6K1	Endothelial
3.39632e-13	0.0621262	0.226	0.14	1.24309e-08	DMD	COP1	Endothelial
3.77404e-07	0.0618008	0.097	0.06	0.0138134	DMD	CCDC91	Endothelial
3.36418e-09	0.0616336	0.139	0.086	0.000123132	DMD	R3HDM1	Endothelial
1.27392e-06	0.0613352	0.051	0.026	0.0466268	DMD	NT5DC1	Endothelial
1.30854e-09	0.0609178	0.119	0.07	4.78938e-05	DMD	PPP3CB	Endothelial
2.16995e-11	0.0602753	0.216	0.139	7.94222e-07	DMD	TNRC6A	Endothelial
5.37468e-12	0.0600961	0.4	0.28	1.96718e-07	DMD	STOX2	Endothelial
1.76248e-07	0.0597878	0.148	0.1	0.00645087	DMD	TCF7L1	Endothelial
3.04718e-07	0.0597454	0.086	0.051	0.011153	DMD	AKAP10	Endothelial
4.48201e-07	0.0596872	0.061	0.032	0.0164046	DMD	EXOC5	Endothelial
3.47653e-07	0.0592707	0.072	0.041	0.0127244	DMD	ZNF33B	Endothelial
1.94921e-07	0.0592205	0.097	0.059	0.00713431	DMD	TTN-AS1	Endothelial
1.79658e-08	0.0588686	0.109	0.066	0.000657565	DMD	RALY	Endothelial
9.99713e-08	0.0588305	0.115	0.072	0.00365905	DMD	TRIM33	Endothelial
9.92576e-07	0.0582843	0.105	0.068	0.0363293	DMD	GALNT10	Endothelial
8.72754e-11	0.0581619	0.169	0.105	3.19437e-06	DMD	PTPRA	Endothelial
5.40644e-07	0.0581371	0.071	0.04	0.0197881	DMD	CCDC93	Endothelial
4.92807e-11	0.057846	0.123	0.069	1.80372e-06	DMD	RB1CC1	Endothelial
7.55099e-10	0.0577256	0.172	0.11	2.76374e-05	DMD	GTF2I	Endothelial
2.07898e-10	0.0575818	0.116	0.066	7.60929e-06	DMD	RNF216	Endothelial
3.14882e-07	0.056672	0.086	0.051	0.011525	DMD	NOTCH1	Endothelial
5.24714e-08	0.0564049	0.093	0.054	0.00192051	DMD	CCDC18-AS1	Endothelial
9.48888e-07	0.0563869	0.107	0.069	0.0347302	DMD	MAX	Endothelial
6.3193e-09	0.0559824	0.119	0.072	0.000231293	DMD	ATE1	Endothelial
7.61667e-07	0.0559546	0.059	0.032	0.0278778	DMD	NAIP	Endothelial
2.89511e-07	0.055742	0.086	0.051	0.0105964	DMD	ENSA	Endothelial
1.36641e-09	0.0554095	0.277	0.194	5.00118e-05	DMD	NCOA1	Endothelial
2.97035e-08	0.0549759	0.099	0.059	0.00108718	DMD	NCK1	Endothelial
2.80845e-07	0.0548753	0.079	0.045	0.0102792	DMD	PSIP1	Endothelial
7.92977e-13	0.0547889	0.293	0.192	2.90238e-08	DMD	AFF1	Endothelial
8.96319e-08	0.0545879	0.089	0.052	0.00328062	DMD	UBE2D2	Endothelial
1.17398e-10	0.0545088	0.139	0.082	4.2969e-06	DMD	ZMYM4	Endothelial
3.77452e-11	0.0542912	0.201	0.128	1.38151e-06	DMD	MON2	Endothelial
6.53779e-08	0.0539389	0.073	0.039	0.0023929	DMD	PRPF3	Endothelial
6.68408e-12	0.0538228	0.297	0.199	2.44644e-07	DMD	JAK1	Endothelial
1.17652e-10	0.0537323	0.187	0.118	4.30619e-06	DMD	MPDZ	Endothelial
9.49017e-07	0.0531504	0.108	0.069	0.034735	DMD	KLHL20	Endothelial
1.06507e-11	0.0530946	0.424	0.299	3.89827e-07	DMD	MACF1	Endothelial
1.27218e-11	0.0530911	0.37	0.253	4.65631e-07	DMD	NFAT5	Endothelial
7.8577e-07	0.0529649	0.075	0.044	0.02876	DMD	ICE2	Endothelial
5.83265e-07	0.0529526	0.092	0.057	0.0213481	DMD	RARS2	Endothelial
3.02764e-07	0.0528049	0.102	0.063	0.0110815	DMD	COPA	Endothelial
5.26086e-07	0.0522588	0.091	0.055	0.0192553	DMD	XRN2	Endothelial
9.93778e-08	0.0521671	0.067	0.036	0.00363733	DMD	TASOR	Endothelial
7.6612e-08	0.0521485	0.134	0.087	0.00280408	DMD	RTN4	Endothelial
1.06433e-08	0.0519515	0.102	0.059	0.000389556	DMD	UBE4B	Endothelial
2.15789e-07	0.0518099	0.113	0.071	0.00789808	DMD	SENP5	Endothelial
6.52145e-11	0.0515479	0.411	0.291	2.38691e-06	DMD	TRIO	Endothelial
9.56159e-09	0.0515069	0.118	0.072	0.000349964	DMD	ZFP36L1	Endothelial
4.931e-12	0.0514098	0.289	0.192	1.80479e-07	DMD	SH3D19	Endothelial
6.22688e-07	0.0512513	0.099	0.062	0.022791	DMD	RBPJ	Endothelial
1.98521e-07	0.0508631	0.152	0.102	0.00726609	DMD	IQCK	Endothelial
9.32232e-08	0.0503816	0.113	0.071	0.00341206	DMD	STAT5B	Endothelial
2.58887e-07	0.04966	0.109	0.069	0.00947551	DMD	AL139317.5	Endothelial
9.09463e-07	0.0493723	0.103	0.066	0.0332872	DMD	HNRNPD	Endothelial
7.03574e-09	0.04933	0.119	0.072	0.000257515	DMD	SNX29	Endothelial
2.03935e-07	0.0491467	0.088	0.052	0.00746424	DMD	CCDC66	Endothelial
3.27927e-08	0.0488788	0.179	0.122	0.00120025	DMD	LMBR1	Endothelial
6.04464e-08	0.048648	0.157	0.105	0.0022124	DMD	PALLD	Endothelial
1.03591e-07	0.0486224	0.076	0.042	0.00379155	DMD	DNHD1	Endothelial
8.41049e-08	0.0483468	0.078	0.044	0.00307832	DMD	AC098617.1	Endothelial
1.45922e-10	0.0481867	0.547	0.407	5.34089e-06	DMD	NFIB	Endothelial
2.70492e-11	0.0474026	0.192	0.121	9.90028e-07	DMD	FTO	Endothelial
6.25261e-09	0.0472594	0.171	0.113	0.000228852	DMD	KDM2A	Endothelial
3.09479e-08	0.0470847	0.15	0.097	0.00113273	DMD	KIAA2026	Endothelial
2.16514e-09	0.0467801	0.197	0.131	7.92461e-05	DMD	TAF15	Endothelial
7.45034e-07	0.0465158	0.084	0.051	0.027269	DMD	CCNC	Endothelial
2.46247e-08	0.0464667	0.111	0.067	0.000901289	DMD	TLK1	Endothelial
2.59802e-09	0.0460344	0.084	0.044	9.50903e-05	DMD	CEP192	Endothelial
1.04261e-06	0.0455156	0.094	0.059	0.0381605	DMD	CRLF3	Endothelial
9.92988e-08	0.0454756	0.129	0.083	0.00363444	DMD	SECISBP2	Endothelial
2.37498e-07	0.0450322	0.127	0.083	0.00869267	DMD	SPPL3	Endothelial
4.6463e-08	0.0449438	0.089	0.051	0.00170059	DMD	TNKS2	Endothelial
9.78963e-09	0.0448756	0.158	0.103	0.00035831	DMD	ZNF207	Endothelial
6.48226e-11	0.044018	0.214	0.139	2.37257e-06	DMD	EPS15	Endothelial
7.52963e-10	0.0437651	0.263	0.181	2.75592e-05	DMD	EEPD1	Endothelial
4.25388e-08	0.0436887	0.117	0.073	0.00155696	DMD	CASK	Endothelial
4.39811e-08	0.0435051	0.098	0.058	0.00160975	DMD	DMXL1	Endothelial
1.8747e-10	0.0433113	0.192	0.123	6.86159e-06	DMD	ZRANB2	Endothelial
7.9621e-11	0.0431756	0.188	0.118	2.91421e-06	DMD	PTBP2	Endothelial
1.00853e-07	0.0429144	0.122	0.078	0.00369132	DMD	VRK2	Endothelial
5.30669e-09	0.0422248	0.218	0.149	0.00019423	DMD	MYH9	Endothelial
1.79539e-09	0.0420383	0.195	0.129	6.5713e-05	DMD	ENTPD1	Endothelial
2.6686e-07	0.0418854	0.174	0.12	0.00976733	DMD	EPC1	Endothelial
2.51652e-07	0.0417122	0.137	0.09	0.0092107	DMD	HGSNAT	Endothelial
5.76061e-07	0.0412744	0.085	0.051	0.0210844	DMD	PPFIA1	Endothelial
2.16753e-09	0.0412511	0.168	0.108	7.93339e-05	DMD	FNBP4	Endothelial
6.371e-07	0.0411524	0.082	0.049	0.0233185	DMD	AAMDC	Endothelial
7.97123e-09	0.0405374	0.132	0.081	0.000291755	DMD	PHC3	Endothelial
9.07489e-09	0.0393273	0.136	0.085	0.00033215	DMD	UBE2H	Endothelial
6.06906e-07	0.0393143	0.119	0.079	0.0222134	DMD	PCNX4	Endothelial
8.38413e-10	0.0390337	0.137	0.083	3.06868e-05	DMD	ZDHHC17	Endothelial
3.07352e-07	0.0389254	0.11	0.07	0.0112494	DMD	EEA1	Endothelial
1.93053e-09	0.0386877	0.154	0.097	7.06592e-05	DMD	CREBBP	Endothelial
6.15265e-07	0.038605	0.08	0.047	0.0225193	DMD	BTN3A1	Endothelial
4.40362e-09	0.0384949	0.144	0.091	0.000161177	DMD	SPG11	Endothelial
2.30857e-12	0.0378668	0.229	0.146	8.44958e-08	DMD	EHBP1	Endothelial
9.41306e-10	0.0374769	0.173	0.111	3.44527e-05	DMD	JARID2	Endothelial
7.33388e-07	0.0373357	0.063	0.034	0.0268427	DMD	TSNAX	Endothelial
1.72311e-07	0.0365578	0.054	0.027	0.00630676	DMD	EPG5	Endothelial
1.26989e-06	0.035568	0.049	0.024	0.0464792	DMD	NCBP1	Endothelial
5.91352e-07	0.0349953	0.086	0.052	0.0216441	DMD	TNFRSF10B	Endothelial
1.74818e-07	0.0349907	0.119	0.076	0.00639851	DMD	CDC14A	Endothelial
[truncated: 13,805 more rows]

## Sheet: b. Subtypes
Seurat FindMarkers output Identifying genes Up-regulated in either DMD or healthy (column F) in each of subtype of major cell population (column H)
p_val	avg_log2FC	pct.1	pct.2	p_val_adj	cluster	gene	Subtypes
1.32614e-22	2.35413	0.623	0.176	4.8538e-18	duchenne	KAZN	Fibroblasts_FB_2
4.37034e-13	2.50878	0.361	0.053	1.59959e-08	duchenne	BMPER	Fibroblasts_FB_2
2.92422e-12	1.17908	0.659	0.328	1.07029e-07	duchenne	LDB2	Fibroblasts_FB_2
4.22985e-12	1.02189	0.813	0.618	1.54817e-07	duchenne	EBF1	Fibroblasts_FB_2
1.95943e-11	1.15732	0.578	0.275	7.1717e-07	duchenne	LAMA4	Fibroblasts_FB_2
2.85308e-11	1.02391	0.636	0.351	1.04426e-06	duchenne	KCND2	Fibroblasts_FB_2
6.62916e-11	1.61447	0.434	0.153	2.42634e-06	duchenne	ESR1	Fibroblasts_FB_2
2.03675e-10	1.76536	0.499	0.244	7.45471e-06	duchenne	RAD51B	Fibroblasts_FB_2
5.76195e-09	0.782192	0.803	0.664	0.000210893	duchenne	COL1A2	Fibroblasts_FB_2
1.12814e-08	1.93687	0.224	0.015	0.000412912	duchenne	NID2	Fibroblasts_FB_2
1.3204e-08	1.15425	0.412	0.145	0.000483281	duchenne	ARHGAP24	Fibroblasts_FB_2
1.45266e-08	0.98998	0.59	0.344	0.000531687	duchenne	PRRX1	Fibroblasts_FB_2
1.95841e-08	0.828579	0.697	0.511	0.000716796	duchenne	BICC1	Fibroblasts_FB_2
3.52127e-08	1.27316	0.296	0.061	0.00128882	duchenne	USP9Y	Fibroblasts_FB_2
7.5781e-08	0.791903	0.761	0.611	0.00277366	duchenne	MIR99AHG	Fibroblasts_FB_2
9.12267e-08	1.45519	0.224	0.023	0.00333899	duchenne	MAN1C1	Fibroblasts_FB_2
1.24725e-07	1.16139	0.407	0.176	0.00456508	duchenne	DMD	Fibroblasts_FB_2
2.26345e-07	1.27746	0.26	0.053	0.00828444	duchenne	TTTY14	Fibroblasts_FB_2
2.92039e-07	0.672956	0.819	0.733	0.0106889	duchenne	NEAT1	Fibroblasts_FB_2
5.7426e-07	0.814015	0.434	0.206	0.0210185	duchenne	MEG3	Fibroblasts_FB_2
6.7861e-07	1.22704	0.319	0.115	0.0248378	duchenne	PDZRN3	Fibroblasts_FB_2
8.2879e-07	1.71557	0.173	0.008	0.0303345	duchenne	PLCG2	Fibroblasts_FB_2
9.1093e-07	0.986596	0.562	0.382	0.033341	duchenne	PRICKLE1	Fibroblasts_FB_2
1.12651e-06	0.783345	0.597	0.405	0.0412313	duchenne	LHFPL6	Fibroblasts_FB_2
1.30436e-06	1.01095	0.444	0.229	0.047741	duchenne	SVIL	Fibroblasts_FB_2
1.34018e-06	1.50763	0.243	0.061	0.0490519	duchenne	ADAMTS12	Fibroblasts_FB_2
4.2992e-279	-3.11247	0.405	0.002	1.57355e-274	healthy	XIST	Fibroblasts_FB_2
5.97372e-46	-2.06919	0.809	0.329	2.18644e-41	healthy	IGFBP7	Fibroblasts_FB_2
1.11374e-44	-2.41863	0.313	0.043	4.07642e-40	healthy	FKBP5	Fibroblasts_FB_2
3.83583e-43	-0.969498	0.092	0.002	1.40395e-38	healthy	TSIX	Fibroblasts_FB_2
4.88952e-32	-1.9794	0.481	0.134	1.78961e-27	healthy	MAMDC2	Fibroblasts_FB_2
1.07337e-30	-1.87606	0.168	0.017	3.92865e-26	healthy	AC004052.1	Fibroblasts_FB_2
1.70712e-28	-1.58258	0.16	0.017	6.24821e-24	healthy	DYNC1I1	Fibroblasts_FB_2
9.41338e-28	-1.09221	0.115	0.008	3.44539e-23	healthy	HEYL	Fibroblasts_FB_2
6.80946e-27	-1.4586	0.893	0.687	2.49233e-22	healthy	LAMA2	Fibroblasts_FB_2
3.38944e-22	-1.59525	0.328	0.084	1.24057e-17	healthy	ZBTB16	Fibroblasts_FB_2
1.32198e-21	-1.72872	0.649	0.311	4.83857e-17	healthy	AL590807.1	Fibroblasts_FB_2
7.19643e-17	-1.38643	0.267	0.071	2.63397e-12	healthy	MAMDC2-AS1	Fibroblasts_FB_2
7.84869e-16	-1.319	0.351	0.119	2.8727e-11	healthy	SPON2	Fibroblasts_FB_2
1.1528e-15	-0.629059	0.038	0.001	4.21937e-11	healthy	RCAN3	Fibroblasts_FB_2
5.40621e-15	-1.2485	0.153	0.029	1.97873e-10	healthy	PCOLCE2	Fibroblasts_FB_2
1.39602e-14	-1.3427	0.74	0.545	5.10958e-10	healthy	GSN	Fibroblasts_FB_2
1.44776e-14	-1.2459	0.198	0.047	5.29893e-10	healthy	MYOC	Fibroblasts_FB_2
1.51893e-14	-1.23388	0.137	0.024	5.55944e-10	healthy	UNC5C	Fibroblasts_FB_2
1.17329e-13	-0.505601	0.015	0	4.29436e-09	healthy	LINC01558	Fibroblasts_FB_2
1.17329e-13	-0.206436	0.015	0	4.29436e-09	healthy	AC027237.3	Fibroblasts_FB_2
2.25675e-13	-1.39232	0.542	0.287	8.25994e-09	healthy	CFD	Fibroblasts_FB_2
5.20541e-13	-1.27295	0.252	0.077	1.90523e-08	healthy	SORBS1	Fibroblasts_FB_2
5.59143e-13	-1.09212	0.466	0.214	2.04652e-08	healthy	VIT	Fibroblasts_FB_2
1.07848e-12	-1.24212	0.565	0.3	3.94736e-08	healthy	CNTN4	Fibroblasts_FB_2
2.0102e-12	-1.31449	0.313	0.115	7.35753e-08	healthy	LINC00377	Fibroblasts_FB_2
6.685e-12	-0.470996	0.038	0.002	2.44678e-07	healthy	ESM1	Fibroblasts_FB_2
9.21535e-12	-1.38646	0.229	0.072	3.37291e-07	healthy	CRISPLD2	Fibroblasts_FB_2
1.23705e-11	-1.23487	0.328	0.13	4.52774e-07	healthy	MFAP5	Fibroblasts_FB_2
2.90918e-11	-1.01832	0.466	0.235	1.06479e-06	healthy	ARHGAP10	Fibroblasts_FB_2
3.20542e-11	-1.16494	0.115	0.022	1.17321e-06	healthy	TMEM233	Fibroblasts_FB_2
5.03214e-11	-1.17992	0.405	0.185	1.84181e-06	healthy	AFF3	Fibroblasts_FB_2
1.26691e-10	-1.25771	0.405	0.194	4.637e-06	healthy	ABLIM1	Fibroblasts_FB_2
1.96569e-10	-1.22103	0.229	0.076	7.19464e-06	healthy	RERG	Fibroblasts_FB_2
2.64118e-10	-0.803054	0.076	0.011	9.667e-06	healthy	TMOD1	Fibroblasts_FB_2
4.12522e-10	-0.570458	0.046	0.004	1.50987e-05	healthy	C11orf96	Fibroblasts_FB_2
6.81826e-10	-0.634158	1	0.999	2.49555e-05	healthy	MALAT1	Fibroblasts_FB_2
7.63706e-10	-1.01148	0.412	0.2	2.79524e-05	healthy	RBMS3-AS2	Fibroblasts_FB_2
1.2607e-09	-0.621916	0.053	0.006	4.61428e-05	healthy	SLC16A12	Fibroblasts_FB_2
1.37031e-09	-1.07122	0.145	0.039	5.01546e-05	healthy	CYTOR	Fibroblasts_FB_2
1.52882e-09	-1.1804	0.275	0.11	5.59562e-05	healthy	SPOCK1	Fibroblasts_FB_2
2.67111e-09	-0.299449	0.015	0	9.77652e-05	healthy	BAMBI	Fibroblasts_FB_2
2.67111e-09	-0.251517	0.015	0	9.77652e-05	healthy	AL355353.1	Fibroblasts_FB_2
2.69867e-09	-0.253042	0.015	0	9.87741e-05	healthy	CALCB	Fibroblasts_FB_2
2.72651e-09	-0.23571	0.015	0	9.97932e-05	healthy	AL592146.2	Fibroblasts_FB_2
2.72651e-09	-0.194901	0.015	0	9.97932e-05	healthy	AC092803.1	Fibroblasts_FB_2
3.47952e-09	-0.763879	0.046	0.005	0.000127354	healthy	CCDC60	Fibroblasts_FB_2
5.09555e-09	-1.17292	0.298	0.126	0.000186502	healthy	PPFIA2	Fibroblasts_FB_2
6.88053e-09	-1.04171	0.214	0.076	0.000251834	healthy	AL445426.1	Fibroblasts_FB_2
7.08622e-09	-1.10212	0.198	0.068	0.000259363	healthy	F3	Fibroblasts_FB_2
7.41546e-09	-0.647549	0.908	0.769	0.000271413	healthy	RBMS3	Fibroblasts_FB_2
7.42483e-09	-0.746403	0.069	0.011	0.000271756	healthy	AC005736.1	Fibroblasts_FB_2
1.21276e-08	-1.0724	0.29	0.125	0.000443881	healthy	SGIP1	Fibroblasts_FB_2
1.48047e-08	-0.250095	0.023	0.001	0.000541866	healthy	OTULINL	Fibroblasts_FB_2
1.80331e-08	-1.0326	0.061	0.009	0.000660031	healthy	ZNF324	Fibroblasts_FB_2
2.2888e-08	-0.907069	0.611	0.41	0.000837723	healthy	PTPRG	Fibroblasts_FB_2
2.4009e-08	-1.12274	0.176	0.058	0.000878754	healthy	LTBP2	Fibroblasts_FB_2
2.44329e-08	-1.58669	0.145	0.043	0.00089427	healthy	PDZRN4	Fibroblasts_FB_2
2.6255e-08	-0.644077	0.053	0.007	0.000960959	healthy	SS18L2	Fibroblasts_FB_2
3.12152e-08	-0.937205	0.359	0.173	0.00114251	healthy	RCAN2	Fibroblasts_FB_2
3.50764e-08	-1.12273	0.42	0.228	0.00128383	healthy	LTBP4	Fibroblasts_FB_2
3.63555e-08	-1.24939	0.305	0.14	0.00133065	healthy	NOX4	Fibroblasts_FB_2
4.94624e-08	-1.70579	0.282	0.127	0.00181037	healthy	APOD	Fibroblasts_FB_2
8.29105e-08	-0.947405	0.573	0.409	0.00303461	healthy	DDX5	Fibroblasts_FB_2
8.46922e-08	-1.12838	0.244	0.103	0.00309982	healthy	SKIL	Fibroblasts_FB_2
9.30219e-08	-1.03699	0.382	0.202	0.0034047	healthy	PCSK5	Fibroblasts_FB_2
9.57219e-08	-0.665252	0.679	0.453	0.00350352	healthy	EXT1	Fibroblasts_FB_2
1.08841e-07	-1.16918	0.176	0.062	0.00398368	healthy	LEPR	Fibroblasts_FB_2
1.56167e-07	-0.350033	0.008	0	0.00571587	healthy	SMG7-AS1	Fibroblasts_FB_2
1.56167e-07	-0.350033	0.008	0	0.00571587	healthy	AP000892.3	Fibroblasts_FB_2
1.56167e-07	-0.282439	0.008	0	0.00571587	healthy	SHISA3	Fibroblasts_FB_2
1.56167e-07	-0.282439	0.008	0	0.00571587	healthy	AC004828.2	Fibroblasts_FB_2
1.56167e-07	-0.24414	0.008	0	0.00571587	healthy	AL035420.2	Fibroblasts_FB_2
1.56167e-07	-0.220172	0.008	0	0.00571587	healthy	AC034199.1	Fibroblasts_FB_2
1.56167e-07	-0.198326	0.008	0	0.00571587	healthy	AL355916.2	Fibroblasts_FB_2
1.56167e-07	-0.195505	0.008	0	0.00571587	healthy	LCT	Fibroblasts_FB_2
1.56167e-07	-0.185293	0.008	0	0.00571587	healthy	AC091231.1	Fibroblasts_FB_2
1.56167e-07	-0.185293	0.008	0	0.00571587	healthy	LINC01275	Fibroblasts_FB_2
1.56167e-07	-0.182223	0.008	0	0.00571587	healthy	FRAT1	Fibroblasts_FB_2
1.56167e-07	-0.180726	0.008	0	0.00571587	healthy	AL593844.1	Fibroblasts_FB_2
1.56167e-07	-0.172236	0.008	0	0.00571587	healthy	AC084781.1	Fibroblasts_FB_2
1.56167e-07	-0.171967	0.008	0	0.00571587	healthy	EPHA8	Fibroblasts_FB_2
1.56167e-07	-0.171967	0.008	0	0.00571587	healthy	FGR	Fibroblasts_FB_2
1.56167e-07	-0.171967	0.008	0	0.00571587	healthy	AC099518.1	Fibroblasts_FB_2
1.56167e-07	-0.171164	0.008	0	0.00571587	healthy	LINC01816	Fibroblasts_FB_2
1.56167e-07	-0.171164	0.008	0	0.00571587	healthy	AF111169.4	Fibroblasts_FB_2
1.56167e-07	-0.165998	0.008	0	0.00571587	healthy	LINC02857	Fibroblasts_FB_2
1.56167e-07	-0.161609	0.008	0	0.00571587	healthy	CHL1-AS2	Fibroblasts_FB_2
1.56167e-07	-0.159732	0.008	0	0.00571587	healthy	AC097375.5	Fibroblasts_FB_2
1.56167e-07	-0.15881	0.008	0	0.00571587	healthy	LINC02466	Fibroblasts_FB_2
1.56167e-07	-0.155006	0.008	0	0.00571587	healthy	AC104667.1	Fibroblasts_FB_2
1.56167e-07	-0.155006	0.008	0	0.00571587	healthy	AC012673.1	Fibroblasts_FB_2
1.56167e-07	-0.152218	0.008	0	0.00571587	healthy	LINC01720	Fibroblasts_FB_2
1.56167e-07	-0.151589	0.008	0	0.00571587	healthy	TRGV7	Fibroblasts_FB_2
1.56167e-07	-0.142925	0.008	0	0.00571587	healthy	AC025287.3	Fibroblasts_FB_2
1.56167e-07	-0.138605	0.008	0	0.00571587	healthy	PWP2	Fibroblasts_FB_2
1.56167e-07	-0.135532	0.008	0	0.00571587	healthy	ASH1L-IT1	Fibroblasts_FB_2
1.56167e-07	-0.135532	0.008	0	0.00571587	healthy	TFAP2A-AS2	Fibroblasts_FB_2
1.56167e-07	-0.13117	0.008	0	0.00571587	healthy	AL355922.4	Fibroblasts_FB_2
1.56167e-07	-0.130703	0.008	0	0.00571587	healthy	AC092687.3	Fibroblasts_FB_2
1.56167e-07	-0.130703	0.008	0	0.00571587	healthy	NEURL3	Fibroblasts_FB_2
1.56167e-07	-0.130703	0.008	0	0.00571587	healthy	FABP6	Fibroblasts_FB_2
1.56167e-07	-0.130703	0.008	0	0.00571587	healthy	AC136475.7	Fibroblasts_FB_2
1.56167e-07	-0.130239	0.008	0	0.00571587	healthy	AP000356.2	Fibroblasts_FB_2
1.56167e-07	-0.130085	0.008	0	0.00571587	healthy	ATP2A1-AS1	Fibroblasts_FB_2
1.56167e-07	-0.128566	0.008	0	0.00571587	healthy	DCAF4L2	Fibroblasts_FB_2
1.56167e-07	-0.128266	0.008	0	0.00571587	healthy	LINC02771	Fibroblasts_FB_2
1.56167e-07	-0.128266	0.008	0	0.00571587	healthy	AC011477.3	Fibroblasts_FB_2
1.56167e-07	-0.126788	0.008	0	0.00571587	healthy	AC063979.2	Fibroblasts_FB_2
1.56167e-07	-0.126788	0.008	0	0.00571587	healthy	AC010649.1	Fibroblasts_FB_2
1.56167e-07	-0.125059	0.008	0	0.00571587	healthy	CSNK2A3	Fibroblasts_FB_2
1.56167e-07	-0.125059	0.008	0	0.00571587	healthy	FGF23	Fibroblasts_FB_2
1.56167e-07	-0.124917	0.008	0	0.00571587	healthy	AC124854.1	Fibroblasts_FB_2
1.56167e-07	-0.124917	0.008	0	0.00571587	healthy	AC041005.1	Fibroblasts_FB_2
1.56167e-07	-0.117704	0.008	0	0.00571587	healthy	LINC02142	Fibroblasts_FB_2
1.56167e-07	-0.115602	0.008	0	0.00571587	healthy	FAM216B	Fibroblasts_FB_2
1.56167e-07	-0.115119	0.008	0	0.00571587	healthy	SIRPB2	Fibroblasts_FB_2
1.56167e-07	-0.113927	0.008	0	0.00571587	healthy	TMEM52B	Fibroblasts_FB_2
1.56167e-07	-0.113341	0.008	0	0.00571587	healthy	AC009236.1	Fibroblasts_FB_2
1.56167e-07	-0.110385	0.008	0	0.00571587	healthy	SEPTIN3	Fibroblasts_FB_2
1.56167e-07	-0.110275	0.008	0	0.00571587	healthy	AC008572.1	Fibroblasts_FB_2
1.56167e-07	-0.110275	0.008	0	0.00571587	healthy	AC009121.3	Fibroblasts_FB_2
1.56167e-07	-0.110275	0.008	0	0.00571587	healthy	AC020911.3	Fibroblasts_FB_2
1.56167e-07	-0.107686	0.008	0	0.00571587	healthy	AL390763.1	Fibroblasts_FB_2
1.56167e-07	-0.104915	0.008	0	0.00571587	healthy	AL390961.2	Fibroblasts_FB_2
1.56167e-07	-0.10276	0.008	0	0.00571587	healthy	GHET1	Fibroblasts_FB_2
1.56167e-07	-0.10276	0.008	0	0.00571587	healthy	DUSP5	Fibroblasts_FB_2
1.56167e-07	-0.10276	0.008	0	0.00571587	healthy	SCGB1D2	Fibroblasts_FB_2
1.56167e-07	-0.100417	0.008	0	0.00571587	healthy	MPV17L2	Fibroblasts_FB_2
1.56167e-07	-0.0979158	0.008	0	0.00571587	healthy	TPH2	Fibroblasts_FB_2
1.56167e-07	-0.0979158	0.008	0	0.00571587	healthy	AMER2	Fibroblasts_FB_2
1.56167e-07	-0.0951238	0.008	0	0.00571587	healthy	LRRC61	Fibroblasts_FB_2
1.56167e-07	-0.0949597	0.008	0	0.00571587	healthy	AP001351.1	Fibroblasts_FB_2
1.56167e-07	-0.0949597	0.008	0	0.00571587	healthy	AC015917.2	Fibroblasts_FB_2
1.56167e-07	-0.0947961	0.008	0	0.00571587	healthy	AC067960.1	Fibroblasts_FB_2
1.56167e-07	-0.0939067	0.008	0	0.00571587	healthy	AC124067.4	Fibroblasts_FB_2
1.56167e-07	-0.0938266	0.008	0	0.00571587	healthy	ZBTB22	Fibroblasts_FB_2
1.56167e-07	-0.0933493	0.008	0	0.00571587	healthy	AC093503.2	Fibroblasts_FB_2
1.56167e-07	-0.0927985	0.008	0	0.00571587	healthy	AC018767.3	Fibroblasts_FB_2
1.56167e-07	-0.0886869	0.008	0	0.00571587	healthy	AC023866.2	Fibroblasts_FB_2
1.56167e-07	-0.0886156	0.008	0	0.00571587	healthy	AL136454.1	Fibroblasts_FB_2
1.56167e-07	-0.0886156	0.008	0	0.00571587	healthy	KNL1	Fibroblasts_FB_2
1.56167e-07	-0.0880486	0.008	0	0.00571587	healthy	AC023347.1	Fibroblasts_FB_2
1.56167e-07	-0.087908	0.008	0	0.00571587	healthy	ENO1-AS1	Fibroblasts_FB_2
1.56167e-07	-0.087908	0.008	0	0.00571587	healthy	AC007920.1	Fibroblasts_FB_2
1.56167e-07	-0.0861875	0.008	0	0.00571587	healthy	AL627316.1	Fibroblasts_FB_2
1.56167e-07	-0.0857846	0.008	0	0.00571587	healthy	LINC01214	Fibroblasts_FB_2
1.56167e-07	-0.0823826	0.008	0	0.00571587	healthy	LINC02710	Fibroblasts_FB_2
1.56167e-07	-0.0823826	0.008	0	0.00571587	healthy	AC116158.2	Fibroblasts_FB_2
1.56167e-07	-0.0811679	0.008	0	0.00571587	healthy	AL603910.1	Fibroblasts_FB_2
1.56167e-07	-0.0811679	0.008	0	0.00571587	healthy	AL391834.1	Fibroblasts_FB_2
1.56167e-07	-0.0774018	0.008	0	0.00571587	healthy	SPINK4	Fibroblasts_FB_2
1.56167e-07	-0.075182	0.008	0	0.00571587	healthy	AP001269.1	Fibroblasts_FB_2
1.56167e-07	-0.0749773	0.008	0	0.00571587	healthy	LINC00376	Fibroblasts_FB_2
1.56167e-07	-0.0731832	0.008	0	0.00571587	healthy	PCDHA10	Fibroblasts_FB_2
1.56167e-07	-0.0731832	0.008	0	0.00571587	healthy	CALML3-AS1	Fibroblasts_FB_2
1.56167e-07	-0.0710121	0.008	0	0.00571587	healthy	AC135048.3	Fibroblasts_FB_2
1.56167e-07	-0.0705118	0.008	0	0.00571587	healthy	AC108073.3	Fibroblasts_FB_2
1.56167e-07	-0.0705118	0.008	0	0.00571587	healthy	AC055736.1	Fibroblasts_FB_2
1.56167e-07	-0.0705118	0.008	0	0.00571587	healthy	AP000146.1	Fibroblasts_FB_2
1.56167e-07	-0.066388	0.008	0	0.00571587	healthy	AC073367.1	Fibroblasts_FB_2
1.56167e-07	-0.066388	0.008	0	0.00571587	healthy	BPIFA3	Fibroblasts_FB_2
1.56167e-07	-0.063626	0.008	0	0.00571587	healthy	AL590062.1	Fibroblasts_FB_2
1.56167e-07	-0.0590219	0.008	0	0.00571587	healthy	AC087286.1	Fibroblasts_FB_2
1.56167e-07	-0.0546026	0.008	0	0.00571587	healthy	AC109992.2	Fibroblasts_FB_2
1.83695e-07	-0.964527	0.168	0.058	0.00672343	healthy	CST3	Fibroblasts_FB_2
2.50166e-07	-0.88271	0.084	0.019	0.00915632	healthy	PRELP	Fibroblasts_FB_2
2.79956e-07	-0.882246	0.458	0.271	0.0102467	healthy	MGP	Fibroblasts_FB_2
3.0745e-07	-1.09121	0.122	0.035	0.011253	healthy	IGFBP6	Fibroblasts_FB_2
3.11248e-07	-0.493941	0.031	0.003	0.011392	healthy	CD70	Fibroblasts_FB_2
3.87481e-07	-0.701132	0.099	0.025	0.0141822	healthy	CLU	Fibroblasts_FB_2
4.18807e-07	-0.452413	0.015	0.001	0.0153287	healthy	JPH4	Fibroblasts_FB_2
4.18807e-07	-0.263287	0.015	0.001	0.0153287	healthy	AC117480.1	Fibroblasts_FB_2
4.18807e-07	-0.212752	0.015	0.001	0.0153287	healthy	AC073569.1	Fibroblasts_FB_2
4.18869e-07	-0.336601	0.038	0.004	0.015331	healthy	DBNDD2	Fibroblasts_FB_2
4.22016e-07	-0.256155	0.015	0.001	0.0154462	healthy	Z82173.1	Fibroblasts_FB_2
4.23629e-07	-0.248572	0.015	0.001	0.0155052	healthy	AC067956.1	Fibroblasts_FB_2
4.25248e-07	-0.307346	0.015	0.001	0.0155645	healthy	ACSL6	Fibroblasts_FB_2
4.25248e-07	-0.257535	0.015	0.001	0.0155645	healthy	AC105446.1	Fibroblasts_FB_2
4.25248e-07	-0.256727	0.015	0.001	0.0155645	healthy	AL139317.3	Fibroblasts_FB_2
4.25248e-07	-0.225165	0.015	0.001	0.0155645	healthy	SLC2A1-AS1	Fibroblasts_FB_2
4.25248e-07	-0.172926	0.015	0.001	0.0155645	healthy	FOXS1	Fibroblasts_FB_2
4.31785e-07	-0.152862	0.015	0.001	0.0158038	healthy	AC005062.1	Fibroblasts_FB_2
5.00818e-07	-0.710344	0.58	0.377	0.0183304	healthy	COL6A2	Fibroblasts_FB_2
5.17815e-07	-0.898264	0.42	0.247	0.0189526	healthy	CBLB	Fibroblasts_FB_2
5.50342e-07	-0.813685	0.092	0.022	0.0201431	healthy	TSC22D3	Fibroblasts_FB_2
6.44133e-07	-0.967565	0.176	0.065	0.0235759	healthy	AOX1	Fibroblasts_FB_2
7.47953e-07	-0.680663	0.053	0.009	0.0273758	healthy	GREB1	Fibroblasts_FB_2
8.15752e-07	-0.978393	0.176	0.066	0.0298573	healthy	SREBF2	Fibroblasts_FB_2
8.32556e-07	-1.15694	0.298	0.154	0.0304724	healthy	MAP1B	Fibroblasts_FB_2
9.01472e-07	-0.704404	0.076	0.017	0.0329948	healthy	GCC2-AS1	Fibroblasts_FB_2
1.08762e-06	-0.939358	0.115	0.034	0.039808	healthy	KIAA1671	Fibroblasts_FB_2
1.08823e-06	-0.333277	0.023	0.002	0.0398303	healthy	AC005064.1	Fibroblasts_FB_2
1.10985e-06	-0.267539	0.023	0.002	0.0406214	healthy	HEY2	Fibroblasts_FB_2
1.13187e-06	-0.255479	0.023	0.002	0.0414277	healthy	PKHD1	Fibroblasts_FB_2
1.20255e-06	-0.915623	0.389	0.214	0.0440146	healthy	KCNIP1	Fibroblasts_FB_2
2.14864e-112	-1.92357	0.722	0.404	7.86424e-108	healthy	LRRTM4	Fibroblasts_FB_5
1.97396e-54	-2.21137	0.249	0.044	7.2249e-50	healthy	AL163541.1	Fibroblasts_FB_5
1.03153e-52	-1.51585	0.409	0.165	3.77552e-48	healthy	GREB1L	Fibroblasts_FB_5
1.17721e-41	-1.37799	0.451	0.255	4.3087e-37	healthy	SPARCL1	Fibroblasts_FB_5
8.15179e-40	-1.38164	0.434	0.234	2.98364e-35	healthy	IGFBP7	Fibroblasts_FB_5
2.17315e-35	-2.035	0.156	0.023	7.95393e-31	healthy	CDH18	Fibroblasts_FB_5
3.77831e-35	-1.67776	0.342	0.158	1.3829e-30	healthy	PTGDS	Fibroblasts_FB_5
1.13302e-34	-1.72168	0.502	0.344	4.14695e-30	healthy	APOD	Fibroblasts_FB_5
7.05574e-30	-0.770443	0.697	0.606	2.58247e-25	healthy	COL15A1	Fibroblasts_FB_5
6.16898e-29	-0.887995	0.669	0.546	2.25791e-24	healthy	AL590807.1	Fibroblasts_FB_5
6.71077e-27	-1.32593	0.316	0.161	2.45621e-22	healthy	AL445250.1	Fibroblasts_FB_5
2.75339e-26	-0.869817	0.581	0.472	1.00777e-21	healthy	SMOC2	Fibroblasts_FB_5
3.23122e-25	-1.35735	0.265	0.124	1.18266e-20	healthy	DOCK5	Fibroblasts_FB_5
9.59303e-23	-0.863901	0.536	0.416	3.51114e-18	healthy	HSPG2	Fibroblasts_FB_5
4.02822e-22	-1.22177	0.215	0.09	1.47437e-17	healthy	MYOC	Fibroblasts_FB_5
4.31033e-22	-1.30966	0.243	0.113	1.57762e-17	healthy	ITGA8	Fibroblasts_FB_5
1.12492e-20	-1.13962	0.313	0.181	4.11733e-16	healthy	LINC00882	Fibroblasts_FB_5
1.33294e-20	-1.23904	0.174	0.064	4.8787e-16	healthy	PLCB4	Fibroblasts_FB_5
1.02735e-17	-1.02726	0.358	0.242	3.76021e-13	healthy	ITIH5	Fibroblasts_FB_5
1.30909e-17	-1.09538	0.074	0.009	4.79141e-13	healthy	INHBA	Fibroblasts_FB_5
1.95739e-16	-0.910143	0.053	0.002	7.16423e-12	healthy	SLCO2B1	Fibroblasts_FB_5
1.17433e-15	-0.526714	0.724	0.688	4.29817e-11	healthy	ABCA8	Fibroblasts_FB_5
3.96177e-15	-0.987328	0.166	0.072	1.45005e-10	healthy	PLEKHA6	Fibroblasts_FB_5
4.53051e-15	-1.00604	0.122	0.042	1.65821e-10	healthy	APCDD1	Fibroblasts_FB_5
1.04837e-14	-0.996219	0.216	0.116	3.83715e-10	healthy	CDK8	Fibroblasts_FB_5
4.56676e-14	-1.03	0.112	0.038	1.67148e-09	healthy	SOX6	Fibroblasts_FB_5
4.83362e-14	-0.732696	0.5	0.4	1.76915e-09	healthy	SCN7A	Fibroblasts_FB_5
5.05046e-14	-0.9201	0.365	0.26	1.84852e-09	healthy	PCDH9	Fibroblasts_FB_5
7.56232e-14	-0.77007	0.202	0.103	2.76789e-09	healthy	MTRNR2L12	Fibroblasts_FB_5
2.05409e-13	-0.956208	0.219	0.123	7.51819e-09	healthy	PCSK6	Fibroblasts_FB_5
3.18473e-13	-0.936678	0.116	0.043	1.16564e-08	healthy	STK32B	Fibroblasts_FB_5
4.10652e-13	-0.67886	0.495	0.417	1.50303e-08	healthy	HMCN2	Fibroblasts_FB_5
4.14823e-13	-0.842089	0.093	0.028	1.51829e-08	healthy	ALPK3	Fibroblasts_FB_5
4.98091e-13	-1.01346	0.132	0.055	1.82306e-08	healthy	RET	Fibroblasts_FB_5
3.10804e-12	-0.726655	0.387	0.289	1.13757e-07	healthy	MT-CYB	Fibroblasts_FB_5
4.57238e-12	-1.08018	0.054	0.009	1.67354e-07	healthy	AC010737.1	Fibroblasts_FB_5
4.73949e-12	-0.736006	0.379	0.281	1.7347e-07	healthy	MME	Fibroblasts_FB_5
4.89048e-12	-0.443154	0.776	0.777	1.78997e-07	healthy	DCN	Fibroblasts_FB_5
4.9967e-12	-0.442477	0.654	0.599	1.82884e-07	healthy	EGFR	Fibroblasts_FB_5
6.55452e-12	-0.930104	0.122	0.051	2.39902e-07	healthy	KCNIP1	Fibroblasts_FB_5
1.05437e-11	-0.681743	0.42	0.325	3.85912e-07	healthy	FKBP5	Fibroblasts_FB_5
1.59457e-11	-0.871352	0.253	0.161	5.83628e-07	healthy	CTDSPL	Fibroblasts_FB_5
2.73439e-11	-0.944763	0.249	0.16	1.00081e-06	healthy	FN1	Fibroblasts_FB_5
5.49645e-11	-0.770952	0.297	0.208	2.01176e-06	healthy	ADAMTSL3	Fibroblasts_FB_5
7.99261e-11	-0.866049	0.12	0.053	2.92537e-06	healthy	LDLRAD3	Fibroblasts_FB_5
9.44426e-11	-0.974644	0.25	0.163	3.45669e-06	healthy	ALDH1A2	Fibroblasts_FB_5
1.55252e-10	-0.962134	0.11	0.047	5.68239e-06	healthy	FAM198B-AS1	Fibroblasts_FB_5
1.98237e-10	-0.704831	0.036	0.003	7.25568e-06	healthy	AC007402.1	Fibroblasts_FB_5
2.33686e-10	-0.65416	0.041	0.005	8.55314e-06	healthy	ACADL	Fibroblasts_FB_5
2.69627e-10	-0.776896	0.099	0.04	9.86863e-06	healthy	SLC1A7	Fibroblasts_FB_5
2.7463e-10	-0.903549	0.143	0.071	1.00517e-05	healthy	SPAG17	Fibroblasts_FB_5
3.15602e-10	-0.854485	0.298	0.215	1.15514e-05	healthy	LINC00377	Fibroblasts_FB_5
1.21913e-09	-0.717691	0.316	0.227	4.46213e-05	healthy	LTBP4	Fibroblasts_FB_5
1.28853e-09	-0.858041	0.049	0.01	4.71615e-05	healthy	TRHDE	Fibroblasts_FB_5
1.3137e-09	-0.860079	0.093	0.038	4.80828e-05	healthy	CRLF1	Fibroblasts_FB_5
1.55038e-09	-0.762341	0.136	0.069	5.67453e-05	healthy	NTN4	Fibroblasts_FB_5
1.60894e-09	-0.688645	0.393	0.312	5.88887e-05	healthy	AFF3	Fibroblasts_FB_5
2.1713e-09	-0.782463	0.029	0.001	7.94717e-05	healthy	LINC02770	Fibroblasts_FB_5
2.46335e-09	-0.857166	0.099	0.043	9.0161e-05	healthy	CLEC14A	Fibroblasts_FB_5
3.97494e-09	-0.76713	0.16	0.09	0.000145487	healthy	LINC00968	Fibroblasts_FB_5
5.90826e-09	-0.533566	0.035	0.004	0.000216248	healthy	RCSD1	Fibroblasts_FB_5
6.73348e-09	-0.457204	0.644	0.619	0.000246452	healthy	GSN	Fibroblasts_FB_5
6.97733e-09	-0.787759	0.346	0.275	0.000255377	healthy	SLIT2	Fibroblasts_FB_5
8.49627e-09	-0.765888	0.106	0.049	0.000310972	healthy	ADAMTSL2	Fibroblasts_FB_5
1.04001e-08	-0.783875	0.333	0.262	0.000380655	healthy	GPHN	Fibroblasts_FB_5
1.36981e-08	-0.689756	0.087	0.036	0.000501363	healthy	KCNS3	Fibroblasts_FB_5
2.13421e-08	-0.735076	0.042	0.009	0.000781141	healthy	UNC5C	Fibroblasts_FB_5
2.24915e-08	-0.926648	0.117	0.061	0.000823211	healthy	SEMA5A	Fibroblasts_FB_5
3.3719e-08	-0.619834	0.067	0.024	0.00123415	healthy	AQP4-AS1	Fibroblasts_FB_5
6.2985e-08	-0.763769	0.167	0.101	0.00230531	healthy	CST3	Fibroblasts_FB_5
6.86213e-08	-0.469272	0.508	0.454	0.00251161	healthy	MT-CO3	Fibroblasts_FB_5
7.32073e-08	-0.715234	0.084	0.036	0.00267946	healthy	PLOD1	Fibroblasts_FB_5
8.28681e-08	-0.780553	0.069	0.027	0.00303306	healthy	AC079117.1	Fibroblasts_FB_5
9.54046e-08	-0.781699	0.108	0.054	0.0034919	healthy	AL355835.1	Fibroblasts_FB_5
1.39784e-07	-0.505436	0.591	0.549	0.00511625	healthy	CFD	Fibroblasts_FB_5
2.30875e-07	-0.719501	0.051	0.016	0.00845025	healthy	ESRRG	Fibroblasts_FB_5
3.01752e-07	-0.603406	0.038	0.009	0.0110444	healthy	FHOD3	Fibroblasts_FB_5
3.03429e-07	-0.609848	0.038	0.009	0.0111058	healthy	TLL2	Fibroblasts_FB_5
3.46497e-07	-0.750472	0.345	0.289	0.0126822	healthy	FBLN2	Fibroblasts_FB_5
5.46309e-07	-0.612554	0.377	0.317	0.0199955	healthy	MT-CO2	Fibroblasts_FB_5
6.63141e-07	-0.58301	0.082	0.038	0.0242716	healthy	AC015878.1	Fibroblasts_FB_5
7.56883e-07	-0.651056	0.201	0.136	0.0277027	healthy	CRISPLD2	Fibroblasts_FB_5
7.6533e-07	-0.252249	0.029	0.005	0.0280118	healthy	HEYL	Fibroblasts_FB_5
8.945e-07	-0.838108	0.125	0.073	0.0327396	healthy	PAPPA	Fibroblasts_FB_5
9.494e-07	-0.496319	0.026	0.004	0.034749	healthy	ADCY5	Fibroblasts_FB_5
9.91679e-07	-0.436116	0.554	0.532	0.0362964	healthy	COL6A2	Fibroblasts_FB_5
1.05995e-06	-0.668645	0.072	0.032	0.0387954	healthy	ABLIM3	Fibroblasts_FB_5
1.12036e-06	-1.12117	0.03	0.006	0.0410064	healthy	AC099520.1	Fibroblasts_FB_5
1.35654e-06	-0.445503	0.021	0.001	0.0496507	healthy	TMEFF2	Fibroblasts_FB_5
1.02182e-77	1.86561	0.451	0.138	3.73995e-73	duchenne	RAD51B	Fibroblasts_FB_5
1.27948e-64	2.13061	0.195	0.005	4.68302e-60	duchenne	FOS	Fibroblasts_FB_5
1.4793e-46	0.870205	0.89	0.724	5.41439e-42	duchenne	NOVA1	Fibroblasts_FB_5
1.68223e-45	1.15117	0.49	0.233	6.15714e-41	duchenne	KCND2	Fibroblasts_FB_5
2.02936e-36	1.49403	0.106	0.001	7.42766e-32	duchenne	FOSB	Fibroblasts_FB_5
2.04831e-36	0.758679	0.657	0.417	7.49703e-32	duchenne	KAZN	Fibroblasts_FB_5
8.91686e-36	1.30403	0.134	0.012	3.26366e-31	duchenne	EGR1	Fibroblasts_FB_5
3.07316e-33	1.12814	0.17	0.033	1.12481e-28	duchenne	ADAMTSL1	Fibroblasts_FB_5
1.04726e-32	0.688472	0.647	0.398	3.83308e-28	duchenne	DCLK1	Fibroblasts_FB_5
9.10858e-32	0.690973	0.504	0.27	3.33383e-27	duchenne	SLC9A9	Fibroblasts_FB_5
4.11105e-30	0.968081	0.252	0.088	1.50468e-25	duchenne	ANGPT1	Fibroblasts_FB_5
8.77553e-30	0.821671	0.31	0.126	3.21193e-25	duchenne	LDB2	Fibroblasts_FB_5
2.3721e-29	1.07022	0.345	0.162	8.68214e-25	duchenne	CFH	Fibroblasts_FB_5
5.17938e-29	1.1393	0.194	0.055	1.8957e-24	duchenne	PRR16	Fibroblasts_FB_5
8.79564e-29	1.05187	0.207	0.062	3.21929e-24	duchenne	HIF3A	Fibroblasts_FB_5
2.9169e-26	0.475495	0.821	0.612	1.06761e-21	duchenne	DLC1	Fibroblasts_FB_5
3.73514e-26	0.829526	0.236	0.086	1.3671e-21	duchenne	DPYSL3	Fibroblasts_FB_5
4.6612e-26	0.778047	0.317	0.143	1.70604e-21	duchenne	CAMK2D	Fibroblasts_FB_5
2.56541e-25	0.786774	0.458	0.27	9.38965e-21	duchenne	LHFPL6	Fibroblasts_FB_5
3.06336e-25	0.933955	0.093	0.008	1.12122e-20	duchenne	JUN	Fibroblasts_FB_5
3.19211e-25	0.81043	0.278	0.119	1.16835e-20	duchenne	ADK	Fibroblasts_FB_5
8.22405e-25	0.808784	0.244	0.095	3.01008e-20	duchenne	EPS8	Fibroblasts_FB_5
1.46736e-24	0.838927	0.252	0.102	5.37069e-20	duchenne	TENT5A	Fibroblasts_FB_5
1.6787e-24	0.963731	0.116	0.02	6.14421e-20	duchenne	GLIS3	Fibroblasts_FB_5
2.42319e-24	0.817502	0.336	0.165	8.8691e-20	duchenne	SNED1	Fibroblasts_FB_5
6.08036e-24	0.526469	0.484	0.276	2.22547e-19	duchenne	TSHZ2	Fibroblasts_FB_5
9.30259e-24	1.21864	0.354	0.195	3.40484e-19	duchenne	LINC01088	Fibroblasts_FB_5
1.54712e-23	0.8966	0.163	0.047	5.66263e-19	duchenne	CACNB4	Fibroblasts_FB_5
1.65571e-23	0.627805	0.501	0.306	6.06007e-19	duchenne	MAML2	Fibroblasts_FB_5
6.00941e-23	0.692039	0.21	0.076	2.19951e-18	duchenne	AC108734.4	Fibroblasts_FB_5
6.94642e-23	0.668104	0.416	0.235	2.54246e-18	duchenne	PRRX1	Fibroblasts_FB_5
2.07886e-22	0.816809	0.141	0.036	7.60883e-18	duchenne	NID2	Fibroblasts_FB_5
2.94492e-22	0.920633	0.092	0.012	1.07787e-17	duchenne	JUNB	Fibroblasts_FB_5
5.52889e-22	0.552568	0.384	0.206	2.02363e-17	duchenne	ANK2	Fibroblasts_FB_5
9.28141e-22	0.499863	0.758	0.605	3.39709e-17	duchenne	EBF1	Fibroblasts_FB_5
1.09742e-21	0.615452	0.335	0.168	4.01666e-17	duchenne	ZEB2	Fibroblasts_FB_5
1.49415e-21	1.06889	0.15	0.044	5.46872e-17	duchenne	AC005237.1	Fibroblasts_FB_5
3.94275e-21	0.964684	0.114	0.024	1.44308e-16	duchenne	PLCG2	Fibroblasts_FB_5
1.37402e-20	0.792022	0.156	0.049	5.02905e-16	duchenne	FGF7	Fibroblasts_FB_5
2.52464e-20	0.905915	0.172	0.06	9.24042e-16	duchenne	ZFP36L1	Fibroblasts_FB_5
3.23119e-20	0.859885	0.159	0.052	1.18265e-15	duchenne	LRFN5	Fibroblasts_FB_5
3.58397e-20	0.52477	0.303	0.146	1.31177e-15	duchenne	FOXP1	Fibroblasts_FB_5
4.92495e-20	1.03925	0.067	0.004	1.80258e-15	duchenne	AC011586.2	Fibroblasts_FB_5
6.84273e-20	0.786432	0.218	0.092	2.50451e-15	duchenne	BCL6	Fibroblasts_FB_5
7.65869e-20	0.943475	0.061	0.002	2.80316e-15	duchenne	PLA2G2A	Fibroblasts_FB_5
6.36458e-19	0.402868	0.701	0.508	2.3295e-14	duchenne	CELF2	Fibroblasts_FB_5
6.42609e-19	0.739601	0.071	0.007	2.35201e-14	duchenne	RSPO3	Fibroblasts_FB_5
1.31217e-18	0.674215	0.299	0.155	4.80267e-14	duchenne	NOX4	Fibroblasts_FB_5
1.49046e-18	0.580279	0.271	0.131	5.45525e-14	duchenne	IGF1R	Fibroblasts_FB_5
1.75099e-18	0.902892	0.087	0.015	6.40878e-14	duchenne	ZFP36	Fibroblasts_FB_5
1.82542e-18	0.778895	0.223	0.098	6.68122e-14	duchenne	AC062004.1	Fibroblasts_FB_5
2.06713e-18	0.990819	0.088	0.016	7.56592e-14	duchenne	SLC2A3	Fibroblasts_FB_5
2.12487e-18	0.691847	0.192	0.078	7.77723e-14	duchenne	ARID5B	Fibroblasts_FB_5
3.98826e-18	0.748162	0.163	0.059	1.45974e-13	duchenne	ZFP36L2	Fibroblasts_FB_5
7.9011e-18	0.612443	0.552	0.393	2.89188e-13	duchenne	DLG2	Fibroblasts_FB_5
1.22618e-17	0.984768	0.124	0.038	4.48796e-13	duchenne	NAA11	Fibroblasts_FB_5
1.38376e-17	0.780469	0.145	0.049	5.06471e-13	duchenne	SULF1	Fibroblasts_FB_5
1.71233e-17	0.529924	0.233	0.106	6.26731e-13	duchenne	TBC1D4	Fibroblasts_FB_5
1.87811e-17	0.439701	0.712	0.527	6.87407e-13	duchenne	MIR99AHG	Fibroblasts_FB_5
2.08854e-17	0.630187	0.253	0.121	7.64427e-13	duchenne	TPST1	Fibroblasts_FB_5
3.04086e-17	0.640266	0.181	0.073	1.11298e-12	duchenne	MAP3K5	Fibroblasts_FB_5
5.97539e-17	0.51212	0.171	0.066	2.18705e-12	duchenne	EFEMP1	Fibroblasts_FB_5
6.12843e-17	0.699075	0.091	0.019	2.24306e-12	duchenne	NTRK2	Fibroblasts_FB_5
6.29098e-17	0.429714	0.578	0.402	2.30256e-12	duchenne	BICC1	Fibroblasts_FB_5
6.56945e-17	0.730095	0.281	0.149	2.40448e-12	duchenne	SDK1	Fibroblasts_FB_5
6.87952e-17	0.753553	0.148	0.053	2.51797e-12	duchenne	SEMA3C	Fibroblasts_FB_5
7.56581e-17	0.572641	0.321	0.178	2.76916e-12	duchenne	LAMA4	Fibroblasts_FB_5
9.88081e-17	0.690156	0.156	0.058	3.61648e-12	duchenne	MITF	Fibroblasts_FB_5
1.03229e-16	0.606737	0.266	0.137	3.77827e-12	duchenne	THRB	Fibroblasts_FB_5
1.4043e-16	0.781466	0.305	0.17	5.13988e-12	duchenne	AL110292.1	Fibroblasts_FB_5
1.5068e-16	0.676071	0.134	0.045	5.51505e-12	duchenne	SLIT3	Fibroblasts_FB_5
1.51619e-16	0.702325	0.054	0.003	5.54939e-12	duchenne	IGFBP3	Fibroblasts_FB_5
1.68278e-16	0.422262	0.459	0.291	6.15915e-12	duchenne	ROBO2	Fibroblasts_FB_5
2.47753e-16	0.542698	0.375	0.23	9.06801e-12	duchenne	DMD	Fibroblasts_FB_5
2.57563e-16	0.530433	0.458	0.3	9.42706e-12	duchenne	PAM	Fibroblasts_FB_5
2.86035e-16	0.682543	0.135	0.046	1.04692e-11	duchenne	CDON	Fibroblasts_FB_5
2.95564e-16	0.492109	0.339	0.191	1.08179e-11	duchenne	PDGFRB	Fibroblasts_FB_5
4.18313e-16	0.827932	0.091	0.021	1.53107e-11	duchenne	MARCH3	Fibroblasts_FB_5
4.42565e-16	0.719444	0.106	0.029	1.61983e-11	duchenne	PDE3A	Fibroblasts_FB_5
4.75015e-16	0.34686	0.766	0.584	1.7386e-11	duchenne	NEAT1	Fibroblasts_FB_5
4.92695e-16	0.712573	0.05	0.002	1.80331e-11	duchenne	SOCS3	Fibroblasts_FB_5
5.21003e-16	0.827486	0.101	0.027	1.90692e-11	duchenne	AP002370.2	Fibroblasts_FB_5
8.54688e-16	0.747552	0.082	0.016	3.12824e-11	duchenne	CCDC85A	Fibroblasts_FB_5
1.48449e-15	0.553308	0.266	0.14	5.43339e-11	duchenne	TMEM135	Fibroblasts_FB_5
1.59271e-15	0.512121	0.323	0.184	5.82949e-11	duchenne	PBX1	Fibroblasts_FB_5
2.35572e-15	0.632385	0.06	0.007	8.62216e-11	duchenne	CERS3-AS1	Fibroblasts_FB_5
3.16695e-15	0.710574	0.086	0.02	1.15914e-10	duchenne	ABCC9	Fibroblasts_FB_5
3.33782e-15	0.483832	0.299	0.166	1.22168e-10	duchenne	KANSL1	Fibroblasts_FB_5
3.42695e-15	0.562323	0.295	0.162	1.2543e-10	duchenne	EHBP1	Fibroblasts_FB_5
4.2223e-15	0.522896	0.303	0.171	1.5454e-10	duchenne	DYNC2H1	Fibroblasts_FB_5
4.49785e-15	0.625038	0.054	0.005	1.64626e-10	duchenne	CNTN3	Fibroblasts_FB_5
6.97826e-15	0.458158	0.576	0.41	2.55411e-10	duchenne	SOX5	Fibroblasts_FB_5
8.16716e-15	0.510537	0.179	0.079	2.98926e-10	duchenne	CNKSR2	Fibroblasts_FB_5
8.85501e-15	0.504916	0.291	0.161	3.24102e-10	duchenne	KCNT2	Fibroblasts_FB_5
1.02043e-14	0.756507	0.084	0.02	3.73488e-10	duchenne	COL21A1	Fibroblasts_FB_5
1.32126e-14	0.713537	0.067	0.011	4.83595e-10	duchenne	MSR1	Fibroblasts_FB_5
2.15619e-14	0.39763	0.37	0.222	7.89186e-10	duchenne	SYNE1	Fibroblasts_FB_5
2.67234e-14	0.554568	0.367	0.233	9.78103e-10	duchenne	PRICKLE1	Fibroblasts_FB_5
2.92125e-14	0.66989	0.155	0.064	1.06921e-09	duchenne	RPS6KA5	Fibroblasts_FB_5
3.19114e-14	0.577844	0.184	0.085	1.16799e-09	duchenne	CD44	Fibroblasts_FB_5
4.37494e-14	0.489068	0.175	0.078	1.60127e-09	duchenne	MYO1D	Fibroblasts_FB_5
4.39575e-14	0.407946	0.527	0.368	1.60889e-09	duchenne	PLAGL1	Fibroblasts_FB_5
4.75792e-14	0.378744	0.46	0.299	1.74144e-09	duchenne	MED13L	Fibroblasts_FB_5
5.35858e-14	0.825883	0.082	0.02	1.9613e-09	duchenne	MACROD2	Fibroblasts_FB_5
6.36001e-14	0.558507	0.104	0.032	2.32783e-09	duchenne	ARL17B	Fibroblasts_FB_5
6.90558e-14	0.709704	0.068	0.013	2.52751e-09	duchenne	CNTNAP4	Fibroblasts_FB_5
7.30063e-14	0.664336	0.144	0.058	2.6721e-09	duchenne	COL14A1	Fibroblasts_FB_5
7.39664e-14	0.651853	0.074	0.016	2.70724e-09	duchenne	MYO1B	Fibroblasts_FB_5
7.68612e-14	0.538932	0.296	0.173	2.8132e-09	duchenne	LINC02511	Fibroblasts_FB_5
1.04685e-13	0.631767	0.122	0.045	3.83158e-09	duchenne	FAT4	Fibroblasts_FB_5
1.43591e-13	0.550606	0.211	0.106	5.25559e-09	duchenne	SVIL	Fibroblasts_FB_5
1.44982e-13	0.653965	0.202	0.1	5.30649e-09	duchenne	ELN	Fibroblasts_FB_5
1.52325e-13	0.53966	0.188	0.088	5.57524e-09	duchenne	MEIS2	Fibroblasts_FB_5
1.5752e-13	0.331776	0.497	0.34	5.76538e-09	duchenne	PARD3B	Fibroblasts_FB_5
1.73167e-13	0.50638	0.28	0.158	6.33809e-09	duchenne	ZNF521	Fibroblasts_FB_5
1.8505e-13	0.537517	0.195	0.095	6.773e-09	duchenne	ITGBL1	Fibroblasts_FB_5
2.24479e-13	0.681222	0.077	0.019	8.21616e-09	duchenne	GPC3	Fibroblasts_FB_5
2.40532e-13	0.440917	0.239	0.126	8.80372e-09	duchenne	SNX9	Fibroblasts_FB_5
2.51368e-13	0.410279	0.356	0.215	9.2003e-09	duchenne	REV3L	Fibroblasts_FB_5
2.68081e-13	0.643275	0.064	0.012	9.81205e-09	duchenne	AC022217.3	Fibroblasts_FB_5
2.9115e-13	0.503604	0.263	0.146	1.06564e-08	duchenne	TGFBR2	Fibroblasts_FB_5
3.04852e-13	0.543097	0.145	0.06	1.11579e-08	duchenne	IFI16	Fibroblasts_FB_5
3.82451e-13	0.42767	0.256	0.141	1.39981e-08	duchenne	TENM1	Fibroblasts_FB_5
5.12117e-13	0.513052	0.214	0.11	1.8744e-08	duchenne	PTPRM	Fibroblasts_FB_5
7.16388e-13	0.653009	0.052	0.007	2.62205e-08	duchenne	LINGO2	Fibroblasts_FB_5
9.64041e-13	0.671589	0.047	0.005	3.52849e-08	duchenne	KLF4	Fibroblasts_FB_5
9.7346e-13	0.516726	0.17	0.078	3.56296e-08	duchenne	ABCA1	Fibroblasts_FB_5
9.73714e-13	0.612532	0.048	0.005	3.56389e-08	duchenne	AC007193.2	Fibroblasts_FB_5
1.61942e-12	0.547142	0.292	0.173	5.92724e-08	duchenne	COL1A1	Fibroblasts_FB_5
1.64443e-12	0.347033	0.595	0.424	6.01878e-08	duchenne	DPYD	Fibroblasts_FB_5
1.66929e-12	0.398133	0.303	0.18	6.10979e-08	duchenne	GLI3	Fibroblasts_FB_5
1.73776e-12	0.584851	0.153	0.069	6.36037e-08	duchenne	IL7	Fibroblasts_FB_5
1.78463e-12	0.323417	0.581	0.422	6.53191e-08	duchenne	PLXDC2	Fibroblasts_FB_5
2.05895e-12	0.446603	0.238	0.129	7.53594e-08	duchenne	PLSCR4	Fibroblasts_FB_5
2.10553e-12	0.688372	0.116	0.044	7.70644e-08	duchenne	MAML3	Fibroblasts_FB_5
2.14428e-12	0.666929	0.081	0.023	7.84828e-08	duchenne	ADAMTS3	Fibroblasts_FB_5
2.93493e-12	0.569885	0.124	0.049	1.07421e-07	duchenne	ATP10A	Fibroblasts_FB_5
3.20124e-12	0.330782	0.402	0.261	1.17168e-07	duchenne	ADD3	Fibroblasts_FB_5
3.53348e-12	0.511755	0.042	0.003	1.29329e-07	duchenne	TLL1	Fibroblasts_FB_5
3.63264e-12	0.534521	0.226	0.124	1.32958e-07	duchenne	HMCN1	Fibroblasts_FB_5
3.92415e-12	0.48807	0.259	0.149	1.43628e-07	duchenne	PRSS23	Fibroblasts_FB_5
4.22749e-12	0.471799	0.186	0.091	1.5473e-07	duchenne	AC106845.1	Fibroblasts_FB_5
5.55425e-12	0.716739	0.15	0.07	2.03291e-07	duchenne	EFNA5	Fibroblasts_FB_5
5.64606e-12	0.579202	0.074	0.02	2.06652e-07	duchenne	IL13RA1	Fibroblasts_FB_5
6.10677e-12	0.646722	0.224	0.126	2.23514e-07	duchenne	AL356124.1	Fibroblasts_FB_5
9.1452e-12	0.445439	0.247	0.139	3.34724e-07	duchenne	ESR1	Fibroblasts_FB_5
9.22585e-12	0.482588	0.2	0.105	3.37675e-07	duchenne	GAB1	Fibroblasts_FB_5
9.33306e-12	0.436448	0.114	0.043	3.41599e-07	duchenne	SH3KBP1	Fibroblasts_FB_5
1.01121e-11	0.666216	0.099	0.035	3.70115e-07	duchenne	GALNT15	Fibroblasts_FB_5
1.53769e-11	0.62981	0.063	0.014	5.62809e-07	duchenne	DUSP1	Fibroblasts_FB_5
1.80426e-11	0.480886	0.115	0.045	6.60378e-07	duchenne	OSMR	Fibroblasts_FB_5
2.0479e-11	0.448978	0.071	0.019	7.49553e-07	duchenne	KHDRBS3	Fibroblasts_FB_5
2.09921e-11	0.471825	0.174	0.087	7.68333e-07	duchenne	ASAP2	Fibroblasts_FB_5
2.1074e-11	0.700506	0.098	0.036	7.71331e-07	duchenne	TUBA1A	Fibroblasts_FB_5
2.19124e-11	0.300581	0.73	0.586	8.02017e-07	duchenne	ABCA10	Fibroblasts_FB_5
2.23118e-11	0.38362	0.394	0.257	8.16635e-07	duchenne	CACNA2D1	Fibroblasts_FB_5
3.05501e-11	0.426788	0.318	0.201	1.11816e-06	duchenne	SETBP1	Fibroblasts_FB_5
3.28716e-11	0.424426	0.149	0.069	1.20314e-06	duchenne	AUH	Fibroblasts_FB_5
3.28967e-11	0.441812	0.135	0.059	1.20405e-06	duchenne	CYP1B1-AS1	Fibroblasts_FB_5
4.02191e-11	0.373667	0.299	0.181	1.47206e-06	duchenne	CDK14	Fibroblasts_FB_5
4.30249e-11	0.479016	0.134	0.059	1.57476e-06	duchenne	WWP1	Fibroblasts_FB_5
4.43313e-11	0.509719	0.132	0.058	1.62257e-06	duchenne	ASAP3	Fibroblasts_FB_5
4.62116e-11	0.353885	0.237	0.133	1.69139e-06	duchenne	ANTXR1	Fibroblasts_FB_5
4.96209e-11	0.313726	0.105	0.039	1.81617e-06	duchenne	LINC00278	Fibroblasts_FB_5
5.01795e-11	0.266642	0.541	0.385	1.83662e-06	duchenne	ABI3BP	Fibroblasts_FB_5
5.08229e-11	0.375693	0.158	0.075	1.86017e-06	duchenne	MAN1C1	Fibroblasts_FB_5
5.08251e-11	0.425647	0.203	0.109	1.86025e-06	duchenne	DIP2C	Fibroblasts_FB_5
5.94915e-11	0.683515	0.117	0.049	2.17745e-06	duchenne	AP002518.2	Fibroblasts_FB_5
5.95579e-11	0.571365	0.116	0.048	2.17988e-06	duchenne	C12orf40	Fibroblasts_FB_5
6.22657e-11	0.529876	0.118	0.049	2.27899e-06	duchenne	RFX2	Fibroblasts_FB_5
6.99785e-11	0.623572	0.078	0.024	2.56128e-06	duchenne	CCN1	Fibroblasts_FB_5
7.67131e-11	0.600132	0.123	0.053	2.80778e-06	duchenne	PTPRG-AS1	Fibroblasts_FB_5
9.15171e-11	0.450226	0.125	0.054	3.34962e-06	duchenne	BMERB1	Fibroblasts_FB_5
9.97687e-11	0.455658	0.125	0.054	3.65163e-06	duchenne	MMP16	Fibroblasts_FB_5
9.99281e-11	0.407932	0.275	0.168	3.65747e-06	duchenne	TCF7L1	Fibroblasts_FB_5
1.02012e-10	0.65105	0.197	0.108	3.73374e-06	duchenne	GPC6	Fibroblasts_FB_5
1.08282e-10	0.581673	0.084	0.028	3.96322e-06	duchenne	AC007098.1	Fibroblasts_FB_5
1.14336e-10	0.33421	0.532	0.388	4.18482e-06	duchenne	IMMP2L	Fibroblasts_FB_5
1.30607e-10	0.517201	0.155	0.077	4.78036e-06	duchenne	TTC7A	Fibroblasts_FB_5
1.32772e-10	0.425588	0.208	0.114	4.85961e-06	duchenne	NDFIP1	Fibroblasts_FB_5
1.48573e-10	0.789817	0.069	0.02	5.43791e-06	duchenne	AL031599.1	Fibroblasts_FB_5
1.55344e-10	0.374167	0.191	0.101	5.68575e-06	duchenne	CARMIL1	Fibroblasts_FB_5
1.55564e-10	0.355575	0.166	0.082	5.69381e-06	duchenne	NLGN4Y	Fibroblasts_FB_5
1.5588e-10	0.351286	0.375	0.25	5.70537e-06	duchenne	FAM13A	Fibroblasts_FB_5
1.88968e-10	0.472994	0.124	0.055	6.91641e-06	duchenne	SMAD3	Fibroblasts_FB_5
2.00697e-10	0.551725	0.146	0.071	7.34572e-06	duchenne	KAZN-AS1	Fibroblasts_FB_5
2.27091e-10	0.430542	0.12	0.051	8.31175e-06	duchenne	PLXNC1	Fibroblasts_FB_5
2.33025e-10	0.309929	0.357	0.233	8.52896e-06	duchenne	MYCBP2	Fibroblasts_FB_5
2.47261e-10	0.510024	0.092	0.034	9.04999e-06	duchenne	CSGALNACT1	Fibroblasts_FB_5
2.53271e-10	0.379081	0.148	0.071	9.26997e-06	duchenne	PRKAG2	Fibroblasts_FB_5
3.29416e-10	0.548629	0.056	0.013	1.20569e-05	duchenne	PLAG1	Fibroblasts_FB_5
3.35241e-10	0.444557	0.24	0.139	1.22702e-05	duchenne	SESTD1	Fibroblasts_FB_5
3.61751e-10	0.460226	0.179	0.094	1.32405e-05	duchenne	MAP4K4	Fibroblasts_FB_5
3.92252e-10	0.396614	0.189	0.102	1.43568e-05	duchenne	USP33	Fibroblasts_FB_5
4.03419e-10	0.403402	0.042	0.006	1.47655e-05	duchenne	AP002961.1	Fibroblasts_FB_5
4.40314e-10	0.49624	0.059	0.015	1.61159e-05	duchenne	ASPN	Fibroblasts_FB_5
4.53748e-10	0.510534	0.106	0.044	1.66076e-05	duchenne	UBL3	Fibroblasts_FB_5
5.16429e-10	0.476168	0.202	0.115	1.89018e-05	duchenne	SRSF5	Fibroblasts_FB_5
5.39481e-10	0.512888	0.069	0.021	1.97455e-05	duchenne	ATP13A3	Fibroblasts_FB_5
5.70823e-10	0.457735	0.056	0.014	2.08927e-05	duchenne	KLF2	Fibroblasts_FB_5
5.86452e-10	0.53028	0.148	0.073	2.14647e-05	duchenne	BTD	Fibroblasts_FB_5
6.48712e-10	0.316441	0.438	0.307	2.37435e-05	duchenne	WSB1	Fibroblasts_FB_5
7.35212e-10	0.481886	0.082	0.029	2.69095e-05	duchenne	ITGB3BP	Fibroblasts_FB_5
7.99729e-10	0.456033	0.145	0.072	2.92709e-05	duchenne	AC010894.3	Fibroblasts_FB_5
8.92452e-10	0.530874	0.126	0.058	3.26646e-05	duchenne	RASAL2	Fibroblasts_FB_5
9.73748e-10	0.221634	0.312	0.196	3.56402e-05	duchenne	PPP3CA	Fibroblasts_FB_5
1.02748e-09	0.622612	0.089	0.034	3.76069e-05	duchenne	STAC	Fibroblasts_FB_5
1.03163e-09	0.46193	0.039	0.005	3.77587e-05	duchenne	AP000331.1	Fibroblasts_FB_5
1.15314e-09	0.472918	0.135	0.064	4.22059e-05	duchenne	CDC14B	Fibroblasts_FB_5
1.2346e-09	0.323255	0.273	0.166	4.51876e-05	duchenne	ADH1B	Fibroblasts_FB_5
1.40595e-09	0.377812	0.124	0.056	5.14593e-05	duchenne	LINC01578	Fibroblasts_FB_5
1.495e-09	0.388294	0.035	0.004	5.47187e-05	duchenne	PCBP3	Fibroblasts_FB_5
1.50252e-09	0.379875	0.135	0.064	5.49938e-05	duchenne	TANC2	Fibroblasts_FB_5
1.55721e-09	0.399958	0.146	0.073	5.69954e-05	duchenne	DNM1	Fibroblasts_FB_5
1.60241e-09	0.432646	0.179	0.097	5.86498e-05	duchenne	SUMF1	Fibroblasts_FB_5
1.72736e-09	0.248926	0.448	0.318	6.32231e-05	duchenne	NR3C1	Fibroblasts_FB_5
1.79197e-09	0.312486	0.268	0.165	6.5588e-05	duchenne	HMGCLL1	Fibroblasts_FB_5
1.82734e-09	0.32978	0.255	0.153	6.68823e-05	duchenne	PHF21A	Fibroblasts_FB_5
1.86901e-09	0.430489	0.043	0.008	6.84077e-05	duchenne	BX322234.1	Fibroblasts_FB_5
1.90502e-09	0.384497	0.345	0.235	6.97256e-05	duchenne	C1orf21	Fibroblasts_FB_5
1.99554e-09	0.421455	0.234	0.14	7.30386e-05	duchenne	WIPF1	Fibroblasts_FB_5
2.1012e-09	0.365368	0.146	0.073	7.69062e-05	duchenne	PCNX2	Fibroblasts_FB_5
2.31415e-09	0.636538	0.095	0.039	8.47001e-05	duchenne	COL24A1	Fibroblasts_FB_5
2.45508e-09	0.437315	0.482	0.361	8.98582e-05	duchenne	TIMP3	Fibroblasts_FB_5
2.50916e-09	0.382296	0.209	0.121	9.18377e-05	duchenne	FBXO11	Fibroblasts_FB_5
2.57461e-09	0.495729	0.08	0.029	9.42334e-05	duchenne	FAM106A	Fibroblasts_FB_5
2.76566e-09	0.301735	0.274	0.171	0.000101226	duchenne	ANKRD17	Fibroblasts_FB_5
2.8985e-09	0.392395	0.193	0.108	0.000106088	duchenne	MAP2K5	Fibroblasts_FB_5
3.33269e-09	0.332481	0.173	0.093	0.00012198	duchenne	OSBPL10	Fibroblasts_FB_5
3.38325e-09	0.443982	0.114	0.051	0.00012383	duchenne	EPB41L3	Fibroblasts_FB_5
3.39708e-09	0.484728	0.08	0.029	0.000124336	duchenne	SLC4A7	Fibroblasts_FB_5
3.77669e-09	0.539962	0.181	0.103	0.00013823	duchenne	BABAM2	Fibroblasts_FB_5
4.14436e-09	0.401893	0.059	0.016	0.000151688	duchenne	THBS2	Fibroblasts_FB_5
4.18997e-09	0.49431	0.034	0.004	0.000153357	duchenne	COL11A1	Fibroblasts_FB_5
4.72955e-09	0.290164	0.3	0.193	0.000173106	duchenne	FYN	Fibroblasts_FB_5
4.99886e-09	0.462501	0.115	0.053	0.000182963	duchenne	LRRC4C	Fibroblasts_FB_5
5.08522e-09	0.519988	0.091	0.037	0.000186124	duchenne	MAP7D3	Fibroblasts_FB_5
5.31395e-09	0.375764	0.359	0.247	0.000194496	duchenne	COL12A1	Fibroblasts_FB_5
5.38957e-09	0.319718	0.364	0.25	0.000197264	duchenne	UST	Fibroblasts_FB_5
5.74585e-09	0.241391	0.315	0.204	0.000210304	duchenne	MACF1	Fibroblasts_FB_5
6.00169e-09	0.551667	0.1	0.043	0.000219668	duchenne	RFTN1	Fibroblasts_FB_5
6.18217e-09	0.26844	0.271	0.171	0.000226273	duchenne	LPAR1	Fibroblasts_FB_5
6.98369e-09	0.373989	0.089	0.036	0.00025561	duchenne	NRK	Fibroblasts_FB_5
7.09784e-09	0.264963	0.369	0.251	0.000259788	duchenne	PLEKHA5	Fibroblasts_FB_5
7.1612e-09	0.465383	0.124	0.06	0.000262107	duchenne	FAM227B	Fibroblasts_FB_5
7.2841e-09	0.437873	0.035	0.005	0.000266605	duchenne	PVT1	Fibroblasts_FB_5
7.28926e-09	0.430883	0.059	0.017	0.000266794	duchenne	MCL1	Fibroblasts_FB_5
7.35687e-09	0.415345	0.418	0.308	0.000269269	duchenne	GHR	Fibroblasts_FB_5
7.62895e-09	0.293266	0.283	0.179	0.000279227	duchenne	MEF2A	Fibroblasts_FB_5
8.61877e-09	0.426141	0.148	0.078	0.000315456	duchenne	ENOSF1	Fibroblasts_FB_5
9.27063e-09	0.472398	0.106	0.048	0.000339314	duchenne	KLF6	Fibroblasts_FB_5
9.66835e-09	0.389104	0.189	0.109	0.000353871	duchenne	AC083870.1	Fibroblasts_FB_5
9.81952e-09	0.303564	0.155	0.081	0.000359404	duchenne	VMP1	Fibroblasts_FB_5
1.01099e-08	0.392127	0.199	0.116	0.000370033	duchenne	RBPJ	Fibroblasts_FB_5
1.04705e-08	0.357152	0.205	0.121	0.000383232	duchenne	ATXN1	Fibroblasts_FB_5
1.10666e-08	0.344672	0.165	0.089	0.000405049	duchenne	IL6ST	Fibroblasts_FB_5
1.15365e-08	0.390883	0.152	0.08	0.000422249	duchenne	HIPK3	Fibroblasts_FB_5
1.16353e-08	0.363878	0.108	0.049	0.000425864	duchenne	MGMT	Fibroblasts_FB_5
1.20267e-08	0.244565	0.446	0.322	0.000440189	duchenne	EPB41L2	Fibroblasts_FB_5
1.21973e-08	0.444367	0.061	0.019	0.000446434	duchenne	ADRA1A	Fibroblasts_FB_5
1.27111e-08	0.375073	0.116	0.055	0.000465238	duchenne	TBC1D2B	Fibroblasts_FB_5
1.35136e-08	0.356919	0.163	0.088	0.000494612	duchenne	MFSD4B	Fibroblasts_FB_5
1.37332e-08	0.244113	0.324	0.215	0.000502649	duchenne	ARHGAP6	Fibroblasts_FB_5
1.38749e-08	0.35421	0.159	0.086	0.000507834	duchenne	FGF14	Fibroblasts_FB_5
1.40212e-08	0.547453	0.054	0.015	0.000513191	duchenne	MIR193BHG	Fibroblasts_FB_5
1.43037e-08	0.255745	0.26	0.163	0.000523528	duchenne	RNF19A	Fibroblasts_FB_5
1.4694e-08	0.243975	0.229	0.139	0.000537817	duchenne	AL109930.1	Fibroblasts_FB_5
1.58595e-08	0.492653	0.104	0.047	0.000580472	duchenne	KCNK15-AS1	Fibroblasts_FB_5
1.59447e-08	0.54544	0.086	0.035	0.000583593	duchenne	AC087854.1	Fibroblasts_FB_5
1.64614e-08	0.3158	0.388	0.274	0.000602504	duchenne	DST	Fibroblasts_FB_5
1.69123e-08	0.282458	0.174	0.097	0.000619009	duchenne	KMT2A	Fibroblasts_FB_5
1.84458e-08	0.39187	0.101	0.045	0.000675135	duchenne	ZDHHC14	Fibroblasts_FB_5
2.17411e-08	0.44656	0.094	0.04	0.000795744	duchenne	FST	Fibroblasts_FB_5
2.19998e-08	0.434273	0.072	0.026	0.000805213	duchenne	MYO1E	Fibroblasts_FB_5
2.25944e-08	0.423553	0.12	0.058	0.000826979	duchenne	ALPK1	Fibroblasts_FB_5
2.50712e-08	0.635075	0.07	0.025	0.00091763	duchenne	SGCZ	Fibroblasts_FB_5
2.536e-08	0.351258	0.093	0.04	0.000928202	duchenne	ADGRA3	Fibroblasts_FB_5
2.55375e-08	0.408457	0.056	0.017	0.000934699	duchenne	NUAK1	Fibroblasts_FB_5
2.63417e-08	0.258702	0.178	0.1	0.000964134	duchenne	ASAP1	Fibroblasts_FB_5
2.72011e-08	0.42827	0.198	0.121	0.000995588	duchenne	MIRLET7BHG	Fibroblasts_FB_5
2.77128e-08	0.30282	0.106	0.048	0.00101431	duchenne	CDH11	Fibroblasts_FB_5
2.97881e-08	0.323029	0.06	0.019	0.00109027	duchenne	TUSC3	Fibroblasts_FB_5
3.08706e-08	0.402804	0.093	0.04	0.0011299	duchenne	RANBP9	Fibroblasts_FB_5
3.28652e-08	0.356865	0.161	0.089	0.0012029	duchenne	CYBRD1	Fibroblasts_FB_5
3.60173e-08	0.412295	0.151	0.082	0.00131827	duchenne	STIM1	Fibroblasts_FB_5
3.62185e-08	0.303037	0.185	0.107	0.00132563	duchenne	WAC	Fibroblasts_FB_5
3.80877e-08	0.349712	0.033	0.005	0.00139405	duchenne	MCTP2	Fibroblasts_FB_5
4.23517e-08	0.305657	0.134	0.069	0.00155011	duchenne	MBP	Fibroblasts_FB_5
4.36232e-08	0.371389	0.166	0.094	0.00159665	duchenne	FAM20A	Fibroblasts_FB_5
4.37947e-08	0.370456	0.052	0.015	0.00160293	duchenne	ROR2	Fibroblasts_FB_5
4.45807e-08	0.309796	0.169	0.095	0.0016317	duchenne	MOB3B	Fibroblasts_FB_5
4.54008e-08	0.361365	0.114	0.056	0.00166171	duchenne	DTWD1	Fibroblasts_FB_5
4.63332e-08	0.383061	0.142	0.076	0.00169584	duchenne	ZC2HC1A	Fibroblasts_FB_5
4.90198e-08	0.208444	0.179	0.1	0.00179417	duchenne	TTTY14	Fibroblasts_FB_5
4.9328e-08	0.238966	0.453	0.324	0.00180545	duchenne	DDX17	Fibroblasts_FB_5
4.95935e-08	0.210852	0.165	0.09	0.00181517	duchenne	UTY	Fibroblasts_FB_5
4.98375e-08	0.273806	0.339	0.228	0.0018241	duchenne	C3	Fibroblasts_FB_5
5.17652e-08	0.440865	0.12	0.061	0.00189466	duchenne	FBXL4	Fibroblasts_FB_5
5.29123e-08	0.402275	0.135	0.071	0.00193664	duchenne	CENPP	Fibroblasts_FB_5
5.29474e-08	0.266322	0.156	0.085	0.00193793	duchenne	TMEM132C	Fibroblasts_FB_5
5.57628e-08	0.332077	0.068	0.025	0.00204097	duchenne	MAF	Fibroblasts_FB_5
5.63799e-08	0.321796	0.184	0.11	0.00206356	duchenne	AC068587.4	Fibroblasts_FB_5
5.69226e-08	0.294914	0.024	0.001	0.00208343	duchenne	CFI	Fibroblasts_FB_5
6.04725e-08	0.327403	0.181	0.105	0.00221335	duchenne	VIM	Fibroblasts_FB_5
6.85526e-08	0.194099	0.505	0.374	0.00250909	duchenne	FBN1	Fibroblasts_FB_5
6.89708e-08	0.40368	0.183	0.11	0.0025244	duchenne	AL357873.1	Fibroblasts_FB_5
6.99641e-08	0.311759	0.195	0.117	0.00256076	duchenne	NPEPPS	Fibroblasts_FB_5
7.03634e-08	0.325647	0.167	0.095	0.00257537	duchenne	NEK7	Fibroblasts_FB_5
7.23237e-08	0.318874	0.067	0.024	0.00264712	duchenne	DIXDC1	Fibroblasts_FB_5
7.88918e-08	0.362941	0.139	0.075	0.00288752	duchenne	HDAC7	Fibroblasts_FB_5
8.04269e-08	0.32238	0.111	0.054	0.00294371	duchenne	PARP14	Fibroblasts_FB_5
8.06859e-08	0.320677	0.142	0.077	0.00295318	duchenne	AGPS	Fibroblasts_FB_5
8.30923e-08	0.392373	0.445	0.337	0.00304126	duchenne	ZNF385D	Fibroblasts_FB_5
8.37106e-08	0.449905	0.114	0.058	0.00306389	duchenne	SH3PXD2A	Fibroblasts_FB_5
9.43592e-08	0.386129	0.028	0.003	0.00345364	duchenne	AL592156.2	Fibroblasts_FB_5
9.44411e-08	0.19929	0.235	0.147	0.00345664	duchenne	NUMB	Fibroblasts_FB_5
1.01097e-07	0.427273	0.031	0.005	0.00370027	duchenne	SLC1A3	Fibroblasts_FB_5
1.01865e-07	0.340197	0.091	0.04	0.00372835	duchenne	AL137009.1	Fibroblasts_FB_5
1.04162e-07	0.19449	0.43	0.306	0.00381243	duchenne	ARID1B	Fibroblasts_FB_5
1.09848e-07	0.351874	0.08	0.033	0.00402055	duchenne	VGLL3	Fibroblasts_FB_5
1.10283e-07	0.274935	0.131	0.069	0.00403645	duchenne	SEPTIN2	Fibroblasts_FB_5
1.10469e-07	0.42964	0.218	0.141	0.00404328	duchenne	IGFBP5	Fibroblasts_FB_5
1.1639e-07	0.360309	0.069	0.026	0.00426	duchenne	SH3BP5	Fibroblasts_FB_5
1.17012e-07	0.227203	0.907	0.833	0.00428274	duchenne	NEGR1	Fibroblasts_FB_5
1.20966e-07	0.250873	0.137	0.073	0.00442746	duchenne	TMEM165	Fibroblasts_FB_5
1.27351e-07	0.407706	0.148	0.082	0.00466116	duchenne	STAG2	Fibroblasts_FB_5
1.29285e-07	0.258707	0.397	0.287	0.00473198	duchenne	SSBP2	Fibroblasts_FB_5
1.38129e-07	0.436197	0.077	0.032	0.00505567	duchenne	GUCY1A1	Fibroblasts_FB_5
1.43744e-07	0.402682	0.108	0.053	0.00526119	duchenne	FAM49A	Fibroblasts_FB_5
1.481e-07	0.349074	0.13	0.069	0.00542062	duchenne	STK38	Fibroblasts_FB_5
1.4909e-07	0.305629	0.247	0.162	0.00545685	duchenne	PDE4D	Fibroblasts_FB_5
1.50472e-07	0.319619	0.265	0.176	0.00550742	duchenne	SRGAP1	Fibroblasts_FB_5
1.54006e-07	0.3302	0.172	0.102	0.00563677	duchenne	PCSK5	Fibroblasts_FB_5
1.66315e-07	0.403827	0.029	0.004	0.00608728	duchenne	MMP3	Fibroblasts_FB_5
1.66801e-07	0.382379	0.174	0.103	0.00610509	duchenne	SGCE	Fibroblasts_FB_5
1.67298e-07	0.147664	0.548	0.41	0.00612329	duchenne	EBF2	Fibroblasts_FB_5
1.71071e-07	0.395999	0.046	0.013	0.00626139	duchenne	BTG1	Fibroblasts_FB_5
1.76943e-07	0.332422	0.035	0.007	0.0064763	duchenne	IER2	Fibroblasts_FB_5
1.88048e-07	0.324432	0.075	0.031	0.00688276	duchenne	MANBA	Fibroblasts_FB_5
1.96429e-07	0.278459	0.152	0.086	0.00718949	duchenne	SNRNP70	Fibroblasts_FB_5
2.28868e-07	0.386403	0.109	0.055	0.0083768	duchenne	NAP1L1	Fibroblasts_FB_5
2.35328e-07	0.177133	0.259	0.169	0.00861324	duchenne	PTPRA	Fibroblasts_FB_5
2.45012e-07	0.308481	0.094	0.044	0.00896769	duchenne	GATAD1	Fibroblasts_FB_5
2.47287e-07	0.270649	0.069	0.027	0.00905093	duchenne	JUND	Fibroblasts_FB_5
2.48006e-07	0.430278	0.15	0.086	0.00907725	duchenne	DLEU1	Fibroblasts_FB_5
2.499e-07	0.254384	0.156	0.088	0.00914657	duchenne	RB1CC1	Fibroblasts_FB_5
2.53733e-07	0.446079	0.064	0.024	0.00928688	duchenne	DOCK10	Fibroblasts_FB_5
2.54798e-07	0.220081	0.283	0.189	0.00932584	duchenne	COLEC12	Fibroblasts_FB_5
2.62017e-07	0.261193	0.295	0.201	0.00959009	duchenne	PPFIBP1	Fibroblasts_FB_5
2.6466e-07	0.303467	0.117	0.06	0.00968684	duchenne	NHSL2	Fibroblasts_FB_5
2.69734e-07	0.326048	0.176	0.106	0.00987253	duchenne	ARHGAP12	Fibroblasts_FB_5
2.90347e-07	0.131572	0.361	0.251	0.010627	duchenne	NFAT5	Fibroblasts_FB_5
2.9105e-07	0.351308	0.085	0.038	0.0106527	duchenne	AC093879.1	Fibroblasts_FB_5
3.09316e-07	0.321301	0.077	0.033	0.0113213	duchenne	KITLG	Fibroblasts_FB_5
3.15558e-07	0.296999	0.172	0.102	0.0115497	duchenne	ODF2L	Fibroblasts_FB_5
3.33102e-07	0.238564	0.192	0.117	0.0121919	duchenne	INSR	Fibroblasts_FB_5
3.34819e-07	0.441586	0.093	0.044	0.0122547	duchenne	C1RL	Fibroblasts_FB_5
3.63499e-07	0.223089	0.33	0.228	0.0133044	duchenne	TNRC6A	Fibroblasts_FB_5
3.70271e-07	0.374814	0.072	0.029	0.0135523	duchenne	KDM7A	Fibroblasts_FB_5
3.77347e-07	0.239317	0.312	0.215	0.0138113	duchenne	PTPRS	Fibroblasts_FB_5
3.85451e-07	0.357839	0.089	0.041	0.0141079	duchenne	CORO2B	Fibroblasts_FB_5
3.90119e-07	0.371233	0.048	0.015	0.0142788	duchenne	RPS2	Fibroblasts_FB_5
3.95943e-07	0.342623	0.089	0.041	0.0144919	duchenne	MIGA1	Fibroblasts_FB_5
3.97308e-07	0.40105	0.146	0.084	0.0145419	duchenne	FRMD6	Fibroblasts_FB_5
3.98545e-07	0.331215	0.139	0.078	0.0145871	duchenne	ACVR2A	Fibroblasts_FB_5
4.38442e-07	0.288235	0.146	0.083	0.0160474	duchenne	ACSS3	Fibroblasts_FB_5
4.43753e-07	0.404644	0.128	0.07	0.0162418	duchenne	SPOCK1	Fibroblasts_FB_5
4.4934e-07	0.343149	0.051	0.016	0.0164463	duchenne	ME3	Fibroblasts_FB_5
4.53222e-07	0.303496	0.122	0.065	0.0165884	duchenne	USP32	Fibroblasts_FB_5
4.54081e-07	0.342163	0.208	0.133	0.0166198	duchenne	ZNF704	Fibroblasts_FB_5
4.61352e-07	0.327947	0.032	0.006	0.016886	duchenne	CSMD2	Fibroblasts_FB_5
4.79738e-07	0.30962	0.138	0.078	0.0175589	duchenne	STRN3	Fibroblasts_FB_5
4.80625e-07	0.369225	0.029	0.005	0.0175914	duchenne	EPHA4	Fibroblasts_FB_5
5.1543e-07	0.433502	0.086	0.04	0.0188653	duchenne	ETS1	Fibroblasts_FB_5
5.23033e-07	0.286242	0.151	0.086	0.0191435	duchenne	MAPK14	Fibroblasts_FB_5
5.23182e-07	0.346006	0.057	0.021	0.019149	duchenne	RASA3	Fibroblasts_FB_5
5.40568e-07	0.427033	0.058	0.021	0.0197853	duchenne	IQCH	Fibroblasts_FB_5
5.63452e-07	0.267299	0.178	0.107	0.0206229	duchenne	RIC1	Fibroblasts_FB_5
5.67762e-07	0.278163	0.202	0.128	0.0207806	duchenne	DHRS3	Fibroblasts_FB_5
5.71575e-07	0.227139	0.289	0.196	0.0209202	duchenne	ARGLU1	Fibroblasts_FB_5
6.03478e-07	0.425287	0.048	0.015	0.0220879	duchenne	AC015923.1	Fibroblasts_FB_5
6.04204e-07	0.19279	0.195	0.119	0.0221145	duchenne	OGT	Fibroblasts_FB_5
6.14062e-07	0.22025	0.211	0.132	0.0224753	duchenne	DENND4C	Fibroblasts_FB_5
6.2488e-07	0.281847	0.153	0.088	0.0228712	duchenne	PCMTD1	Fibroblasts_FB_5
6.49155e-07	0.312538	0.134	0.074	0.0237597	duchenne	AL513166.1	Fibroblasts_FB_5
6.68814e-07	0.327261	0.168	0.102	0.0244793	duchenne	CAB39L	Fibroblasts_FB_5
6.87135e-07	0.280828	0.182	0.112	0.0251498	duchenne	DPYD-AS1	Fibroblasts_FB_5
6.88456e-07	0.273332	0.271	0.184	0.0251982	duchenne	NKTR	Fibroblasts_FB_5
7.34162e-07	0.416873	0.207	0.134	0.0268711	duchenne	FILIP1	Fibroblasts_FB_5
8.05887e-07	0.235283	0.175	0.105	0.0294963	duchenne	CELF1	Fibroblasts_FB_5
8.19057e-07	0.41847	0.096	0.048	0.0299783	duchenne	CUEDC1	Fibroblasts_FB_5
8.19762e-07	0.245673	0.132	0.073	0.0300041	duchenne	YBX3	Fibroblasts_FB_5
8.24406e-07	0.293378	0.03	0.005	0.0301741	duchenne	FMO1	Fibroblasts_FB_5
8.4214e-07	0.315176	0.03	0.005	0.0308232	duchenne	KCP	Fibroblasts_FB_5
8.60303e-07	0.343924	0.041	0.012	0.031488	duchenne	GAS1RR	Fibroblasts_FB_5
8.71786e-07	0.163519	0.234	0.151	0.0319083	duchenne	PKN2	Fibroblasts_FB_5
8.75312e-07	0.258843	0.167	0.1	0.0320373	duchenne	ARIH1	Fibroblasts_FB_5
8.77752e-07	0.280736	0.028	0.005	0.0321266	duchenne	CPXM1	Fibroblasts_FB_5
8.90491e-07	0.24805	0.069	0.029	0.0325929	duchenne	RNASEH2B	Fibroblasts_FB_5
9.55974e-07	0.217472	0.409	0.298	0.0349896	duchenne	SBF2	Fibroblasts_FB_5
9.59068e-07	0.264565	0.22	0.141	0.0351028	duchenne	TBL1XR1	Fibroblasts_FB_5
9.62011e-07	0.23733	0.187	0.116	0.0352106	duchenne	KIF1B	Fibroblasts_FB_5
9.95756e-07	0.161116	0.497	0.373	0.0364457	duchenne	JAK1	Fibroblasts_FB_5
1.01905e-06	0.227243	0.111	0.058	0.0372982	duchenne	GABPB1-AS1	Fibroblasts_FB_5
1.03057e-06	0.355217	0.133	0.075	0.03772	duchenne	SRSF7	Fibroblasts_FB_5
1.03776e-06	0.271351	0.085	0.039	0.037983	duchenne	LRIG3	Fibroblasts_FB_5
1.04661e-06	0.211119	0.124	0.067	0.038307	duchenne	AASS	Fibroblasts_FB_5
1.09358e-06	0.26635	0.312	0.221	0.040026	duchenne	QKI	Fibroblasts_FB_5
1.13968e-06	0.194689	0.307	0.216	0.0417135	duchenne	ROBO1	Fibroblasts_FB_5
1.18779e-06	0.265725	0.129	0.071	0.0434742	duchenne	RGL1	Fibroblasts_FB_5
1.19832e-06	0.401943	0.089	0.043	0.0438595	duchenne	MTERF4	Fibroblasts_FB_5
1.21671e-06	0.289942	0.119	0.064	0.044533	duchenne	SECISBP2L	Fibroblasts_FB_5
1.24732e-06	0.256482	0.181	0.112	0.0456531	duchenne	NT5C2	Fibroblasts_FB_5
1.336e-06	0.333767	0.025	0.003	0.048899	duchenne	IGSF9B	Fibroblasts_FB_5
5.72977e-13	1.18152	0.514	0.15	2.09715e-08	duchenne	LMO7	Myofibers_Immature fibers
6.31376e-13	1.28279	0.831	0.564	2.3109e-08	duchenne	EMC10	Myofibers_Immature fibers
7.14105e-13	2.43458	0.346	0.05	2.6137e-08	duchenne	MYH3	Myofibers_Immature fibers
4.45681e-12	0.944303	0.558	0.207	1.63124e-07	duchenne	AC011287.1	Myofibers_Immature fibers
8.20433e-12	0.835188	0.587	0.257	3.00287e-07	duchenne	LDB3	Myofibers_Immature fibers
9.74632e-12	1.49564	0.435	0.129	3.56725e-07	duchenne	ARHGAP24	Myofibers_Immature fibers
1.73787e-11	1.51349	0.393	0.1	6.36076e-07	duchenne	ANK2	Myofibers_Immature fibers
2.08936e-11	1.10983	0.438	0.129	7.64725e-07	duchenne	FLRT2	Myofibers_Immature fibers
9.48773e-11	1.45697	0.347	0.071	3.4726e-06	duchenne	RYR3	Myofibers_Immature fibers
1.30558e-10	0.824807	0.666	0.329	4.77857e-06	duchenne	AC108734.4	Myofibers_Immature fibers
1.5e-10	1.51965	0.306	0.043	5.49015e-06	duchenne	PLCG2	Myofibers_Immature fibers
1.66353e-10	0.929672	0.448	0.143	6.08867e-06	duchenne	MCU	Myofibers_Immature fibers
4.60909e-10	0.951786	0.581	0.257	1.68697e-05	duchenne	RUNX1	Myofibers_Immature fibers
4.66666e-10	0.724266	0.709	0.393	1.70804e-05	duchenne	AC020909.2	Myofibers_Immature fibers
5.93173e-10	2.26541	0.244	0.014	2.17107e-05	duchenne	PTPRD	Myofibers_Immature fibers
9.79801e-10	1.5246	0.275	0.036	3.58617e-05	duchenne	MYOF	Myofibers_Immature fibers
3.50714e-09	1.54307	0.241	0.021	0.000128365	duchenne	CCDC39	Myofibers_Immature fibers
7.37026e-09	1.27564	0.258	0.036	0.000269759	duchenne	FRY	Myofibers_Immature fibers
7.76203e-09	0.819032	0.473	0.186	0.000284098	duchenne	PLCL2	Myofibers_Immature fibers
7.80519e-09	1.06984	0.289	0.057	0.000285678	duchenne	ACTC1	Myofibers_Immature fibers
8.0424e-09	0.875287	0.428	0.157	0.00029436	duchenne	ANKRD10	Myofibers_Immature fibers
9.44786e-09	0.56113	0.599	0.3	0.000345801	duchenne	MYO18B	Myofibers_Immature fibers
1.07142e-08	1.55268	0.24	0.029	0.00039215	duchenne	ANTXR1	Myofibers_Immature fibers
1.14753e-08	0.773914	0.346	0.093	0.000420009	duchenne	LIMA1	Myofibers_Immature fibers
1.27616e-08	1.12634	0.321	0.086	0.000467087	duchenne	AMPD1	Myofibers_Immature fibers
1.71724e-08	1.07123	0.654	0.421	0.000628526	duchenne	RIF1	Myofibers_Immature fibers
1.90937e-08	1.01706	0.378	0.129	0.000698848	duchenne	TENM3	Myofibers_Immature fibers
2.2216e-08	0.822382	0.344	0.093	0.000813129	duchenne	CALD1	Myofibers_Immature fibers
2.40916e-08	1.31473	0.223	0.021	0.000881777	duchenne	AC083870.1	Myofibers_Immature fibers
2.50478e-08	0.685496	0.377	0.121	0.000916776	duchenne	RBM24	Myofibers_Immature fibers
2.69007e-08	0.438085	0.301	0.071	0.000984591	duchenne	AMOTL1	Myofibers_Immature fibers
3.11369e-08	0.904923	0.768	0.564	0.00113964	duchenne	TTN-AS1	Myofibers_Immature fibers
3.33123e-08	1.01488	0.346	0.107	0.00121926	duchenne	MTSS1	Myofibers_Immature fibers
3.48546e-08	0.935175	0.316	0.079	0.00127571	duchenne	NT5C2	Myofibers_Immature fibers
3.59644e-08	0.386481	0.314	0.079	0.00131633	duchenne	FANCC	Myofibers_Immature fibers
4.12143e-08	0.453709	0.241	0.036	0.00150848	duchenne	EYA1	Myofibers_Immature fibers
4.46007e-08	0.729268	0.482	0.2	0.00163243	duchenne	TNIK	Myofibers_Immature fibers
5.73104e-08	0.94047	0.341	0.107	0.00209762	duchenne	ANKS1B	Myofibers_Immature fibers
6.23533e-08	1.4952	0.223	0.029	0.00228219	duchenne	AC007319.1	Myofibers_Immature fibers
6.25164e-08	0.992223	0.271	0.057	0.00228816	duchenne	TTLL11	Myofibers_Immature fibers
6.81411e-08	0.680355	0.63	0.357	0.00249403	duchenne	CMYA5	Myofibers_Immature fibers
8.27397e-08	0.573959	0.247	0.043	0.00302836	duchenne	CEP112	Myofibers_Immature fibers
1.13458e-07	0.993973	0.342	0.114	0.00415267	duchenne	AC010680.5	Myofibers_Immature fibers
1.20519e-07	1.06425	0.234	0.036	0.00441112	duchenne	CLCN5	Myofibers_Immature fibers
1.23546e-07	1.28181	0.216	0.029	0.00452189	duchenne	SMPX	Myofibers_Immature fibers
1.31015e-07	0.442536	0.821	0.557	0.00479527	duchenne	MEF2C	Myofibers_Immature fibers
1.41856e-07	0.20959	0.355	0.114	0.00519209	duchenne	TRIO	Myofibers_Immature fibers
1.88486e-07	0.813058	0.33	0.1	0.00689876	duchenne	USP9Y	Myofibers_Immature fibers
1.90443e-07	0.692413	0.426	0.171	0.00697039	duchenne	LRRFIP1	Myofibers_Immature fibers
2.0356e-07	0.991755	0.3	0.086	0.00745048	duchenne	TMEM108	Myofibers_Immature fibers
2.31335e-07	0.90667	0.254	0.057	0.00846711	duchenne	ROCK2	Myofibers_Immature fibers
2.35963e-07	0.457468	0.528	0.25	0.0086365	duchenne	RBFOX2	Myofibers_Immature fibers
2.49106e-07	0.866586	0.272	0.064	0.00911754	duchenne	MYOM2	Myofibers_Immature fibers
2.50445e-07	0.897544	0.286	0.071	0.00916653	duchenne	SPTB	Myofibers_Immature fibers
2.65008e-07	0.675932	0.654	0.379	0.00969955	duchenne	DST	Myofibers_Immature fibers
2.75143e-07	0.715289	0.402	0.157	0.0100705	duchenne	BEST3	Myofibers_Immature fibers
3.0288e-07	0.487166	0.485	0.214	0.0110857	duchenne	MICU1	Myofibers_Immature fibers
3.31528e-07	0.978321	0.273	0.071	0.0121343	duchenne	REEP1	Myofibers_Immature fibers
3.86332e-07	0.889002	0.304	0.093	0.0141402	duchenne	FXR1	Myofibers_Immature fibers
4.50531e-07	0.916805	0.263	0.064	0.0164899	duchenne	MLIP-AS1	Myofibers_Immature fibers
4.60821e-07	0.283903	0.561	0.286	0.0168665	duchenne	PARD3	Myofibers_Immature fibers
4.62478e-07	0.948375	0.255	0.057	0.0169272	duchenne	MTR	Myofibers_Immature fibers
5.49839e-07	0.614071	0.455	0.2	0.0201247	duchenne	TEAD1	Myofibers_Immature fibers
5.66811e-07	0.597647	0.466	0.207	0.0207458	duchenne	MACF1	Myofibers_Immature fibers
5.96847e-07	0.784796	0.335	0.114	0.0218452	duchenne	GTF2I	Myofibers_Immature fibers
6.81071e-07	0.587736	0.478	0.229	0.0249279	duchenne	ACTN2	Myofibers_Immature fibers
7.48298e-07	0.617723	0.529	0.286	0.0273885	duchenne	MYOM1	Myofibers_Immature fibers
7.52555e-07	0.484516	0.404	0.164	0.0275443	duchenne	ATP2A2	Myofibers_Immature fibers
7.54727e-07	0.380997	0.534	0.264	0.0276238	duchenne	ASB5	Myofibers_Immature fibers
7.69173e-07	0.682485	0.438	0.193	0.0281525	duchenne	CASQ2	Myofibers_Immature fibers
8.52125e-07	0.571392	0.527	0.264	0.0311886	duchenne	CMSS1	Myofibers_Immature fibers
9.0647e-07	0.570832	0.568	0.279	0.0331777	duchenne	SOX6	Myofibers_Immature fibers
9.31786e-07	0.475322	0.465	0.2	0.0341043	duchenne	PAM	Myofibers_Immature fibers
1.03501e-06	0.481928	0.285	0.079	0.0378822	duchenne	KALRN	Myofibers_Immature fibers
1.1136e-06	0.939358	0.268	0.071	0.0407589	duchenne	PLCE1	Myofibers_Immature fibers
1.28034e-06	0.875118	0.269	0.071	0.0468618	duchenne	GALNT17	Myofibers_Immature fibers
1.32535e-06	0.422564	0.336	0.121	0.0485092	duchenne	CD36	Myofibers_Immature fibers
1.33378e-06	0.460862	0.304	0.093	0.0488175	duchenne	MFSD4B	Myofibers_Immature fibers
1.35452e-06	0.813352	0.275	0.079	0.0495767	duchenne	TMEM38B	Myofibers_Immature fibers
2.979e-38	-1.0526	0.057	0.001	1.09034e-33	healthy	VWC2	Myofibers_Immature fibers
2.79961e-36	-2.04624	0.314	0.058	1.02468e-31	healthy	FKBP5	Myofibers_Immature fibers
4.94015e-29	-0.999468	0.036	0.001	1.80814e-24	healthy	LINC00836	Myofibers_Immature fibers
1.92439e-25	-1.30541	0.093	0.008	7.04346e-21	healthy	ADGRB3	Myofibers_Immature fibers
2.84797e-19	-1.02843	0.043	0.002	1.04238e-14	healthy	VAT1L	Myofibers_Immature fibers
8.70029e-19	-1.9307	0.086	0.009	3.18439e-14	healthy	AJ009632.2	Myofibers_Immature fibers
2.57076e-16	-1.2912	0.129	0.022	9.40924e-12	healthy	PLCB4	Myofibers_Immature fibers
1.64948e-15	-1.7533	0.093	0.013	6.03728e-11	healthy	CPM	Myofibers_Immature fibers
6.64191e-15	-0.780293	0.014	0	2.43101e-10	healthy	GATA2	Myofibers_Immature fibers
6.64191e-15	-0.340302	0.014	0	2.43101e-10	healthy	AC008738.2	Myofibers_Immature fibers
6.64191e-15	-0.147293	0.014	0	2.43101e-10	healthy	SKAP1-AS1	Myofibers_Immature fibers
6.9632e-13	-0.93309	0.057	0.006	2.5486e-08	healthy	GAS2	Myofibers_Immature fibers
2.20466e-12	-1.61302	0.129	0.028	8.06926e-08	healthy	ATRNL1	Myofibers_Immature fibers
5.33572e-12	-1.35448	0.071	0.01	1.95293e-07	healthy	U91319.1	Myofibers_Immature fibers
8.27785e-12	-0.563092	0.043	0.004	3.02977e-07	healthy	LGR5	Myofibers_Immature fibers
9.22888e-12	-0.365153	0.007	0	3.37786e-07	healthy	TLDC2	Myofibers_Immature fibers
9.22888e-12	-0.296553	0.007	0	3.37786e-07	healthy	AL445213.2	Myofibers_Immature fibers
9.22888e-12	-0.254025	0.007	0	3.37786e-07	healthy	AL133520.1	Myofibers_Immature fibers
9.22888e-12	-0.229628	0.007	0	3.37786e-07	healthy	LINC01854	Myofibers_Immature fibers
9.22888e-12	-0.213427	0.007	0	3.37786e-07	healthy	AC100797.5	Myofibers_Immature fibers
9.22888e-12	-0.212985	0.007	0	3.37786e-07	healthy	AC010273.3	Myofibers_Immature fibers
9.22888e-12	-0.212985	0.007	0	3.37786e-07	healthy	DYDC1	Myofibers_Immature fibers
9.22888e-12	-0.209088	0.007	0	3.37786e-07	healthy	AC243585.2	Myofibers_Immature fibers
9.22888e-12	-0.203304	0.007	0	3.37786e-07	healthy	AC136489.1	Myofibers_Immature fibers
9.22888e-12	-0.182078	0.007	0	3.37786e-07	healthy	AC009229.3	Myofibers_Immature fibers
9.22888e-12	-0.169765	0.007	0	3.37786e-07	healthy	AC016575.2	Myofibers_Immature fibers
9.22888e-12	-0.159013	0.007	0	3.37786e-07	healthy	LINC02668	Myofibers_Immature fibers
9.22888e-12	-0.12992	0.007	0	3.37786e-07	healthy	KLF17	Myofibers_Immature fibers
9.22888e-12	-0.12943	0.007	0	3.37786e-07	healthy	LINC01538	Myofibers_Immature fibers
9.22888e-12	-0.12092	0.007	0	3.37786e-07	healthy	AL449223.1	Myofibers_Immature fibers
9.22888e-12	-0.11801	0.007	0	3.37786e-07	healthy	AL137220.1	Myofibers_Immature fibers
9.22888e-12	-0.11801	0.007	0	3.37786e-07	healthy	LINC00395	Myofibers_Immature fibers
9.22888e-12	-0.11801	0.007	0	3.37786e-07	healthy	LINC02248	Myofibers_Immature fibers
9.22888e-12	-0.11801	0.007	0	3.37786e-07	healthy	AP000525.1	Myofibers_Immature fibers
9.22888e-12	-0.112224	0.007	0	3.37786e-07	healthy	AP001330.4	Myofibers_Immature fibers
9.22888e-12	-0.110656	0.007	0	3.37786e-07	healthy	TDGF1	Myofibers_Immature fibers
9.22888e-12	-0.110656	0.007	0	3.37786e-07	healthy	AC010307.4	Myofibers_Immature fibers
9.22888e-12	-0.110656	0.007	0	3.37786e-07	healthy	CU633906.5	Myofibers_Immature fibers
9.22888e-12	-0.108672	0.007	0	3.37786e-07	healthy	AL031289.2	Myofibers_Immature fibers
9.22888e-12	-0.0982071	0.007	0	3.37786e-07	healthy	AF228727.1	Myofibers_Immature fibers
9.22888e-12	-0.0785805	0.007	0	3.37786e-07	healthy	AC013269.1	Myofibers_Immature fibers
9.22888e-12	-0.0639484	0.007	0	3.37786e-07	healthy	AC139491.3	Myofibers_Immature fibers
9.22888e-12	-0.0418809	0.007	0	3.37786e-07	healthy	AL137186.1	Myofibers_Immature fibers
9.22888e-12	-0.0418809	0.007	0	3.37786e-07	healthy	LIPN	Myofibers_Immature fibers
9.22888e-12	-0.040198	0.007	0	3.37786e-07	healthy	AL354743.2	Myofibers_Immature fibers
9.22888e-12	-0.0356134	0.007	0	3.37786e-07	healthy	OPRK1	Myofibers_Immature fibers
2.10134e-11	-1.65365	0.107	0.022	7.69112e-07	healthy	COL22A1	Myofibers_Immature fibers
1.59995e-10	-0.427351	0.029	0.002	5.85596e-06	healthy	AC016576.1	Myofibers_Immature fibers
9.59133e-10	-1.24086	0.093	0.019	3.51052e-05	healthy	LINC02284	Myofibers_Immature fibers
1.19822e-09	-2.33437	0.15	0.045	4.38559e-05	healthy	AC020637.1	Myofibers_Immature fibers
1.65011e-09	-1.57029	0.25	0.107	6.03957e-05	healthy	ASB15	Myofibers_Immature fibers
3.49344e-09	-0.774025	0.014	0	0.000127863	healthy	KIT	Myofibers_Immature fibers
3.49344e-09	-0.262212	0.014	0	0.000127863	healthy	AC012038.2	Myofibers_Immature fibers
3.57378e-09	-0.167963	0.014	0	0.000130804	healthy	AC011840.1	Myofibers_Immature fibers
6.0306e-09	-0.851569	0.043	0.005	0.000220726	healthy	AC104574.2	Myofibers_Immature fibers
3.07791e-08	-0.735506	0.021	0.001	0.00112654	healthy	AC018618.1	Myofibers_Immature fibers
9.1989e-08	-1.40437	0.179	0.066	0.00336689	healthy	PAMR1	Myofibers_Immature fibers
9.64496e-08	-0.318664	0.014	0.001	0.00353015	healthy	CSF3	Myofibers_Immature fibers
9.8749e-08	-0.159184	0.014	0.001	0.00361431	healthy	AL391807.1	Myofibers_Immature fibers
1.32302e-07	-0.942418	0.057	0.01	0.00484239	healthy	NUPR1	Myofibers_Immature fibers
2.50358e-07	-1.22606	0.35	0.199	0.00916335	healthy	ABLIM1	Myofibers_Immature fibers
4.49169e-07	-0.447539	0.021	0.002	0.01644	healthy	ZNF804B	Myofibers_Immature fibers
4.60094e-07	-0.87089	0.107	0.031	0.0168399	healthy	AL591501.1	Myofibers_Immature fibers
4.62527e-07	-0.281974	0.021	0.002	0.016929	healthy	RIMBP2	Myofibers_Immature fibers
6.43592e-07	-1.63228	0.279	0.147	0.0235561	healthy	RCAN2	Myofibers_Immature fibers
1.04284e-06	-0.363837	0.014	0.001	0.038169	healthy	AC011472.2	Myofibers_Immature fibers
1.06828e-06	-0.215917	0.014	0.001	0.0391002	healthy	TMPRSS15	Myofibers_Immature fibers
1.07258e-06	-0.17188	0.014	0.001	0.0392576	healthy	AC079414.1	Myofibers_Immature fibers
1.53244e-10	2.68338	0.789	0.206	5.60887e-06	duchenne	COL1A1	Fibroblasts_FB_3
5.50911e-07	1.47791	0.842	0.471	0.0201639	duchenne	COL1A2	Fibroblasts_FB_3
3.19746e-27	-0.999307	0.059	0	1.1703e-22	healthy	AC006369.1	Fibroblasts_FB_3
5.2369e-21	-1.2456	0.029	0	1.91676e-16	healthy	Z98949.3	Fibroblasts_FB_3
5.2369e-21	-1.08292	0.029	0	1.91676e-16	healthy	B3GNT7	Fibroblasts_FB_3
5.2369e-21	-1.05475	0.029	0	1.91676e-16	healthy	MBLAC1	Fibroblasts_FB_3
5.2369e-21	-0.868824	0.029	0	1.91676e-16	healthy	LINC01054	Fibroblasts_FB_3
5.2369e-21	-0.868824	0.029	0	1.91676e-16	healthy	R3HDML	Fibroblasts_FB_3
5.2369e-21	-0.857965	0.029	0	1.91676e-16	healthy	GDA	Fibroblasts_FB_3
5.2369e-21	-0.849127	0.029	0	1.91676e-16	healthy	NAV2-AS2	Fibroblasts_FB_3
5.2369e-21	-0.837064	0.029	0	1.91676e-16	healthy	LY6K	Fibroblasts_FB_3
5.2369e-21	-0.772914	0.029	0	1.91676e-16	healthy	NCMAP-DT	Fibroblasts_FB_3
5.2369e-21	-0.772914	0.029	0	1.91676e-16	healthy	AC079949.6	Fibroblasts_FB_3
5.2369e-21	-0.772914	0.029	0	1.91676e-16	healthy	AC027796.4	Fibroblasts_FB_3
5.2369e-21	-0.772914	0.029	0	1.91676e-16	healthy	AC073508.3	Fibroblasts_FB_3
5.2369e-21	-0.753253	0.029	0	1.91676e-16	healthy	LINC01310	Fibroblasts_FB_3
5.2369e-21	-0.672812	0.029	0	1.91676e-16	healthy	AC083973.1	Fibroblasts_FB_3
5.2369e-21	-0.62169	0.029	0	1.91676e-16	healthy	AC009704.1	Fibroblasts_FB_3
5.2369e-21	-0.573925	0.029	0	1.91676e-16	healthy	AC037441.1	Fibroblasts_FB_3
5.2369e-21	-0.572356	0.029	0	1.91676e-16	healthy	XIST	Fibroblasts_FB_3
5.2369e-21	-0.555656	0.029	0	1.91676e-16	healthy	AC090519.2	Fibroblasts_FB_3
5.2369e-21	-0.555656	0.029	0	1.91676e-16	healthy	FOXS1	Fibroblasts_FB_3
5.2369e-21	-0.551271	0.029	0	1.91676e-16	healthy	AC067773.1	Fibroblasts_FB_3
5.2369e-21	-0.52902	0.029	0	1.91676e-16	healthy	AL158136.1	Fibroblasts_FB_3
5.2369e-21	-0.518561	0.029	0	1.91676e-16	healthy	AC007785.1	Fibroblasts_FB_3
5.2369e-21	-0.39348	0.029	0	1.91676e-16	healthy	LINC01676	Fibroblasts_FB_3
5.2369e-21	-0.39348	0.029	0	1.91676e-16	healthy	PKDREJ	Fibroblasts_FB_3
5.2369e-21	-0.337209	0.029	0	1.91676e-16	healthy	GADD45G	Fibroblasts_FB_3
5.2369e-21	-0.314377	0.029	0	1.91676e-16	healthy	AC010255.3	Fibroblasts_FB_3
5.2369e-21	-0.314377	0.029	0	1.91676e-16	healthy	TNFSF15	Fibroblasts_FB_3
1.31128e-20	-0.630951	0.059	0.001	4.7994e-16	healthy	TSIX	Fibroblasts_FB_3
4.41533e-12	-0.948631	0.059	0.002	1.61605e-07	healthy	AC089998.4	Fibroblasts_FB_3
4.5653e-12	-0.753543	0.059	0.002	1.67095e-07	healthy	LRRC24	Fibroblasts_FB_3
4.76871e-11	-1.3287	0.029	0	1.74539e-06	healthy	ZNF628	Fibroblasts_FB_3
4.76871e-11	-1.05504	0.029	0	1.74539e-06	healthy	AC245100.6	Fibroblasts_FB_3
4.76871e-11	-1.00685	0.029	0	1.74539e-06	healthy	SLC16A12-AS1	Fibroblasts_FB_3
4.76871e-11	-0.973093	0.029	0	1.74539e-06	healthy	AC078864.1	Fibroblasts_FB_3
4.76871e-11	-0.931349	0.029	0	1.74539e-06	healthy	SYN2	Fibroblasts_FB_3
4.76871e-11	-0.92907	0.029	0	1.74539e-06	healthy	C1GALT1C1L	Fibroblasts_FB_3
4.76871e-11	-0.864499	0.029	0	1.74539e-06	healthy	COX4I2	Fibroblasts_FB_3
4.76871e-11	-0.842455	0.029	0	1.74539e-06	healthy	ONECUT3	Fibroblasts_FB_3
4.76871e-11	-0.813486	0.029	0	1.74539e-06	healthy	AC100849.1	Fibroblasts_FB_3
4.76871e-11	-0.812131	0.029	0	1.74539e-06	healthy	AC026124.2	Fibroblasts_FB_3
4.76871e-11	-0.745528	0.029	0	1.74539e-06	healthy	IRF4	Fibroblasts_FB_3
4.76871e-11	-0.743771	0.029	0	1.74539e-06	healthy	MAP6D1	Fibroblasts_FB_3
4.76871e-11	-0.698799	0.029	0	1.74539e-06	healthy	LINC00581	Fibroblasts_FB_3
4.76871e-11	-0.669932	0.029	0	1.74539e-06	healthy	MEI4	Fibroblasts_FB_3
4.76871e-11	-0.669198	0.029	0	1.74539e-06	healthy	USP26	Fibroblasts_FB_3
4.76871e-11	-0.619083	0.029	0	1.74539e-06	healthy	LINC01202	Fibroblasts_FB_3
4.76871e-11	-0.618768	0.029	0	1.74539e-06	healthy	AC005599.1	Fibroblasts_FB_3
4.76871e-11	-0.616347	0.029	0	1.74539e-06	healthy	LAMB4	Fibroblasts_FB_3
4.76871e-11	-0.52428	0.029	0	1.74539e-06	healthy	MMD2	Fibroblasts_FB_3
4.76871e-11	-0.515712	0.029	0	1.74539e-06	healthy	AC107072.2	Fibroblasts_FB_3
4.76871e-11	-0.440096	0.029	0	1.74539e-06	healthy	LINC02360	Fibroblasts_FB_3
4.76871e-11	-0.440021	0.029	0	1.74539e-06	healthy	SMIM40	Fibroblasts_FB_3
4.76871e-11	-0.439495	0.029	0	1.74539e-06	healthy	GALR1	Fibroblasts_FB_3
4.76871e-11	-0.438176	0.029	0	1.74539e-06	healthy	AL591848.4	Fibroblasts_FB_3
4.76871e-11	-0.41047	0.029	0	1.74539e-06	healthy	AC026992.2	Fibroblasts_FB_3
4.76871e-11	-0.408638	0.029	0	1.74539e-06	healthy	AL157756.1	Fibroblasts_FB_3
4.76871e-11	-0.389802	0.029	0	1.74539e-06	healthy	AL033519.5	Fibroblasts_FB_3
4.91258e-11	-0.648501	0.029	0	1.79805e-06	healthy	CHST8	Fibroblasts_FB_3
4.91258e-11	-0.547817	0.029	0	1.79805e-06	healthy	AC007846.1	Fibroblasts_FB_3
4.91258e-11	-0.53794	0.029	0	1.79805e-06	healthy	SPACA3	Fibroblasts_FB_3
4.91258e-11	-0.407079	0.029	0	1.79805e-06	healthy	AL357500.1	Fibroblasts_FB_3
4.91258e-11	-0.387777	0.029	0	1.79805e-06	healthy	CEBPA-DT	Fibroblasts_FB_3
4.91258e-11	-0.348819	0.029	0	1.79805e-06	healthy	MDH1B	Fibroblasts_FB_3
4.91258e-11	-0.332074	0.029	0	1.79805e-06	healthy	TRIAP1	Fibroblasts_FB_3
4.91258e-11	-0.308902	0.029	0	1.79805e-06	healthy	LAMC3	Fibroblasts_FB_3
4.91258e-11	-0.307621	0.029	0	1.79805e-06	healthy	PLUT	Fibroblasts_FB_3
4.91258e-11	-0.30726	0.029	0	1.79805e-06	healthy	AL365203.2	Fibroblasts_FB_3
1.16417e-10	-1.29579	0.059	0.002	4.26096e-06	healthy	AC067956.1	Fibroblasts_FB_3
1.57255e-09	-0.883566	0.059	0.002	5.75569e-05	healthy	RRP9	Fibroblasts_FB_3
1.28314e-08	-0.817622	0.059	0.003	0.000469642	healthy	THG1L	Fibroblasts_FB_3
4.37666e-08	-1.33876	0.088	0.007	0.0016019	healthy	ZNF625	Fibroblasts_FB_3
7.10131e-08	-0.914656	0.059	0.003	0.00259915	healthy	AC018557.2	Fibroblasts_FB_3
8.75001e-08	-1.42636	0.088	0.007	0.00320259	healthy	ZNF627	Fibroblasts_FB_3
1.08311e-07	-1.25316	0.029	0.001	0.00396429	healthy	LRFN1	Fibroblasts_FB_3
1.08311e-07	-1.24508	0.029	0.001	0.00396429	healthy	AP003170.3	Fibroblasts_FB_3
1.08311e-07	-1.17115	0.029	0.001	0.00396429	healthy	AL023581.1	Fibroblasts_FB_3
1.08311e-07	-1.07653	0.029	0.001	0.00396429	healthy	AC073578.2	Fibroblasts_FB_3
1.08311e-07	-1.03042	0.029	0.001	0.00396429	healthy	PARS2	Fibroblasts_FB_3
1.08311e-07	-0.950693	0.029	0.001	0.00396429	healthy	TMEM45B	Fibroblasts_FB_3
1.08311e-07	-0.926714	0.029	0.001	0.00396429	healthy	AC034102.4	Fibroblasts_FB_3
1.08311e-07	-0.925416	0.029	0.001	0.00396429	healthy	MRPL53	Fibroblasts_FB_3
1.08311e-07	-0.830513	0.029	0.001	0.00396429	healthy	AL136040.2	Fibroblasts_FB_3
1.08311e-07	-0.825669	0.029	0.001	0.00396429	healthy	GFER	Fibroblasts_FB_3
1.08311e-07	-0.805655	0.029	0.001	0.00396429	healthy	AP001574.1	Fibroblasts_FB_3
1.08311e-07	-0.763718	0.029	0.001	0.00396429	healthy	TIMM8A	Fibroblasts_FB_3
1.08311e-07	-0.758702	0.029	0.001	0.00396429	healthy	HCN3	Fibroblasts_FB_3
1.08311e-07	-0.743606	0.029	0.001	0.00396429	healthy	PRB3	Fibroblasts_FB_3
1.08311e-07	-0.680383	0.029	0.001	0.00396429	healthy	TMPRSS2	Fibroblasts_FB_3
1.08311e-07	-0.614342	0.029	0.001	0.00396429	healthy	AC079807.1	Fibroblasts_FB_3
1.08311e-07	-0.614235	0.029	0.001	0.00396429	healthy	AC107032.3	Fibroblasts_FB_3
1.08311e-07	-0.609035	0.029	0.001	0.00396429	healthy	AC007325.4	Fibroblasts_FB_3
1.08311e-07	-0.562839	0.029	0.001	0.00396429	healthy	PTPRZ1	Fibroblasts_FB_3
1.08311e-07	-0.521111	0.029	0.001	0.00396429	healthy	LINC02413	Fibroblasts_FB_3
1.08311e-07	-0.384418	0.029	0.001	0.00396429	healthy	SDR9C7	Fibroblasts_FB_3
1.10479e-07	-0.541131	0.029	0.001	0.00404363	healthy	LINC02389	Fibroblasts_FB_3
1.10479e-07	-0.540934	0.029	0.001	0.00404363	healthy	SCEL	Fibroblasts_FB_3
1.10479e-07	-0.535701	0.029	0.001	0.00404363	healthy	CDK18	Fibroblasts_FB_3
1.10479e-07	-0.532734	0.029	0.001	0.00404363	healthy	ZDHHC12	Fibroblasts_FB_3
1.10479e-07	-0.429978	0.029	0.001	0.00404363	healthy	KCNH5	Fibroblasts_FB_3
1.10479e-07	-0.379033	0.029	0.001	0.00404363	healthy	MOCS3	Fibroblasts_FB_3
1.10479e-07	-0.327466	0.029	0.001	0.00404363	healthy	LCMT1-AS2	Fibroblasts_FB_3
1.10479e-07	-0.324643	0.029	0.001	0.00404363	healthy	AC015849.4	Fibroblasts_FB_3
1.12688e-07	-0.42024	0.029	0.001	0.0041245	healthy	CCDC163	Fibroblasts_FB_3
1.12688e-07	-0.381233	0.029	0.001	0.0041245	healthy	LYSMD1	Fibroblasts_FB_3
1.12688e-07	-0.339115	0.029	0.001	0.0041245	healthy	CDKN2B	Fibroblasts_FB_3
1.12688e-07	-0.331385	0.029	0.001	0.0041245	healthy	AP001033.1	Fibroblasts_FB_3
1.12688e-07	-0.322565	0.029	0.001	0.0041245	healthy	POC1A	Fibroblasts_FB_3
1.12688e-07	-0.322014	0.029	0.001	0.0041245	healthy	CACNG5	Fibroblasts_FB_3
1.74542e-07	-1.7456	0.765	0.531	0.0063884	healthy	LRRTM4	Fibroblasts_FB_3
2.82574e-07	-0.796823	0.059	0.003	0.0103425	healthy	AL353653.1	Fibroblasts_FB_3
8.56987e-07	-1.18332	0.059	0.004	0.0313666	healthy	AC008403.3	Fibroblasts_FB_3
8.7234e-07	-1.46246	0.059	0.004	0.0319285	healthy	MAPKAPK3	Fibroblasts_FB_3
9.1189e-07	-0.995936	0.059	0.004	0.0333761	healthy	DBNDD2	Fibroblasts_FB_3
9.36443e-07	-1.04441	0.059	0.004	0.0342748	healthy	TPO	Fibroblasts_FB_3
3.29064e-161	-2.6418	0.333	0	1.20441e-156	healthy	GZMK	Fibroblasts_FB_6
3.29064e-161	-2.6418	0.333	0	1.20441e-156	healthy	OCA2	Fibroblasts_FB_6
3.29064e-161	-2.35051	0.333	0	1.20441e-156	healthy	AL731533.3	Fibroblasts_FB_6
3.29064e-161	-2.35051	0.333	0	1.20441e-156	healthy	PLA2G1B	Fibroblasts_FB_6
3.29064e-161	-2.35051	0.333	0	1.20441e-156	healthy	CNDP1	Fibroblasts_FB_6
1.78642e-81	-2.34339	0.333	0	6.53847e-77	healthy	CES1	Fibroblasts_FB_6
2.49427e-81	-2.63075	0.333	0	9.12928e-77	healthy	LRRC52-AS1	Fibroblasts_FB_6
7.37708e-55	-3.47857	0.333	0.001	2.70008e-50	healthy	DUOXA1	Fibroblasts_FB_6
9.21746e-55	-2.60406	0.333	0.001	3.37368e-50	healthy	AC090739.1	Fibroblasts_FB_6
9.21746e-55	-2.33764	0.333	0.001	3.37368e-50	healthy	APOBEC4	Fibroblasts_FB_6
1.56361e-41	-2.62526	0.333	0.001	5.72297e-37	healthy	SAP25	Fibroblasts_FB_6
1.56361e-41	-2.3428	0.333	0.001	5.72297e-37	healthy	AL450344.3	Fibroblasts_FB_6
1.56361e-41	-2.33552	0.333	0.001	5.72297e-37	healthy	AC093607.1	Fibroblasts_FB_6
1.56361e-41	-2.33546	0.333	0.001	5.72297e-37	healthy	B4GAT1	Fibroblasts_FB_6
1.84815e-41	-2.61419	0.333	0.001	6.76443e-37	healthy	LINC01811	Fibroblasts_FB_6
1.81496e-33	-2.62125	0.333	0.002	6.64292e-29	healthy	SLC16A12	Fibroblasts_FB_6
3.51275e-28	-3.46903	0.333	0.002	1.2857e-23	healthy	C16orf71	Fibroblasts_FB_6
3.71447e-28	-2.321	0.333	0.002	1.35953e-23	healthy	MAGEH1	Fibroblasts_FB_6
3.92771e-28	-2.32727	0.333	0.002	1.43758e-23	healthy	RXRG	Fibroblasts_FB_6
3.92771e-28	-2.31561	0.333	0.002	1.43758e-23	healthy	MFSD3	Fibroblasts_FB_6
4.3981e-27	-3.21234	0.667	0.01	1.60975e-22	healthy	LINC02694	Fibroblasts_FB_6
4.40867e-26	-3.21561	0.667	0.011	1.61362e-21	healthy	HNRNPUL2	Fibroblasts_FB_6
3.11349e-24	-2.29946	0.333	0.003	1.13957e-19	healthy	APLNR	Fibroblasts_FB_6
2.053e-21	-2.30791	0.333	0.003	7.51419e-17	healthy	AL358332.1	Fibroblasts_FB_6
2.98894e-19	-2.60095	0.333	0.004	1.09398e-14	healthy	ADGRF3	Fibroblasts_FB_6
3.22055e-19	-3.43244	0.333	0.004	1.17875e-14	healthy	AKR1C8P	Fibroblasts_FB_6
3.46986e-19	-2.57351	0.333	0.004	1.27001e-14	healthy	ISOC1	Fibroblasts_FB_6
4.02709e-19	-2.28333	0.333	0.004	1.47395e-14	healthy	ARL9	Fibroblasts_FB_6
1.84776e-17	-2.30022	0.333	0.004	6.763e-13	healthy	Z99127.1	Fibroblasts_FB_6
1.97625e-17	-3.42626	0.333	0.004	7.23328e-13	healthy	AC114971.1	Fibroblasts_FB_6
2.11355e-17	-2.57838	0.333	0.004	7.73579e-13	healthy	C20orf187	Fibroblasts_FB_6
5.76243e-16	-2.57484	0.333	0.005	2.10911e-11	healthy	ZNF223	Fibroblasts_FB_6
5.76243e-16	-2.28772	0.333	0.005	2.10911e-11	healthy	SLCO2B1	Fibroblasts_FB_6
6.12556e-16	-2.28669	0.333	0.005	2.24202e-11	healthy	NAALADL2-AS3	Fibroblasts_FB_6
6.51122e-16	-2.26869	0.333	0.005	2.38317e-11	healthy	RGS3	Fibroblasts_FB_6
9.08807e-15	-2.58561	0.333	0.005	3.32632e-10	healthy	C17orf78	Fibroblasts_FB_6
9.08807e-15	-2.57983	0.333	0.005	3.32632e-10	healthy	HLA-DRB1	Fibroblasts_FB_6
1.13717e-14	-2.24647	0.333	0.005	4.16215e-10	healthy	RCSD1	Fibroblasts_FB_6
9.90555e-14	-3.41926	0.333	0.005	3.62553e-09	healthy	TTC32	Fibroblasts_FB_6
7.69557e-13	-3.41584	0.333	0.006	2.81665e-08	healthy	MXD3	Fibroblasts_FB_6
8.47365e-13	-2.57331	0.333	0.006	3.10144e-08	healthy	ELAC1	Fibroblasts_FB_6
4.98839e-12	-2.54978	0.333	0.006	1.8258e-07	healthy	FRMPD4	Fibroblasts_FB_6
5.70743e-12	-2.20451	0.333	0.006	2.08898e-07	healthy	ISYNA1	Fibroblasts_FB_6
2.16682e-11	-3.40327	0.333	0.007	7.93079e-07	healthy	AC090518.1	Fibroblasts_FB_6
2.16682e-11	-3.40007	0.333	0.007	7.93079e-07	healthy	SCAMP5	Fibroblasts_FB_6
2.26028e-11	-3.37868	0.333	0.007	8.27285e-07	healthy	AFAP1L1	Fibroblasts_FB_6
2.45919e-11	-2.26246	0.333	0.007	9.00088e-07	healthy	ZNRD1	Fibroblasts_FB_6
4.14925e-11	-3.53527	0.667	0.029	1.51867e-06	healthy	ZBTB16	Fibroblasts_FB_6
8.93641e-11	-2.55399	0.333	0.007	3.27081e-06	healthy	LLGL1	Fibroblasts_FB_6
9.2987e-11	-2.26388	0.333	0.007	3.40342e-06	healthy	MLANA	Fibroblasts_FB_6
9.67534e-11	-2.26287	0.333	0.007	3.54127e-06	healthy	CHPF	Fibroblasts_FB_6
3.27434e-10	-2.25243	0.333	0.008	1.19844e-05	healthy	IKBKE	Fibroblasts_FB_6
3.27434e-10	-2.25199	0.333	0.008	1.19844e-05	healthy	AC004988.1	Fibroblasts_FB_6
3.39945e-10	-2.24216	0.333	0.008	1.24423e-05	healthy	AC009313.1	Fibroblasts_FB_6
3.52922e-10	-2.5026	0.333	0.008	1.29173e-05	healthy	AMZ2	Fibroblasts_FB_6
3.66383e-10	-2.22343	0.333	0.008	1.341e-05	healthy	AC023906.5	Fibroblasts_FB_6
1.01134e-09	-2.22135	0.333	0.008	3.70161e-05	healthy	AC011092.3	Fibroblasts_FB_6
1.16553e-09	-2.47164	0.333	0.008	4.26594e-05	healthy	ELOB	Fibroblasts_FB_6
2.35931e-09	-3.37398	0.333	0.009	8.63531e-05	healthy	AKAP1	Fibroblasts_FB_6
2.44064e-09	-3.38108	0.333	0.009	8.933e-05	healthy	PUS1	Fibroblasts_FB_6
2.61158e-09	-2.23268	0.333	0.009	9.55864e-05	healthy	EAF1	Fibroblasts_FB_6
2.74738e-09	-2.5055	0.333	0.009	0.000100557	healthy	DOCK8	Fibroblasts_FB_6
2.98914e-09	-2.21014	0.333	0.009	0.000109405	healthy	TRPM4	Fibroblasts_FB_6
5.85559e-09	-3.78615	0.667	0.038	0.000214321	healthy	CCDC122	Fibroblasts_FB_6
6.16777e-09	-2.53978	0.333	0.009	0.000225747	healthy	KATNB1	Fibroblasts_FB_6
6.36991e-09	-2.50972	0.333	0.009	0.000233145	healthy	FAM189B	Fibroblasts_FB_6
1.30748e-08	-3.34605	0.333	0.01	0.000478552	healthy	AC008438.1	Fibroblasts_FB_6
2.75667e-08	-3.37134	0.333	0.01	0.00100897	healthy	ZBTB2	Fibroblasts_FB_6
2.75667e-08	-3.36717	0.333	0.01	0.00100897	healthy	C16orf87	Fibroblasts_FB_6
2.75667e-08	-3.07509	0.333	0.01	0.00100897	healthy	GDAP1	Fibroblasts_FB_6
2.83932e-08	-2.23806	0.333	0.01	0.00103922	healthy	MCUR1	Fibroblasts_FB_6
2.92437e-08	-3.30337	0.333	0.01	0.00107035	healthy	AC027279.1	Fibroblasts_FB_6
3.01189e-08	-2.52451	0.333	0.01	0.00110238	healthy	FAIM	Fibroblasts_FB_6
3.01189e-08	-2.22761	0.333	0.01	0.00110238	healthy	LINC00640	Fibroblasts_FB_6
3.10195e-08	-2.23327	0.333	0.01	0.00113535	healthy	AL139021.2	Fibroblasts_FB_6
5.4665e-08	-3.37661	0.333	0.01	0.00200079	healthy	PAFAH2	Fibroblasts_FB_6
5.4665e-08	-2.53051	0.333	0.01	0.00200079	healthy	WDFY3-AS2	Fibroblasts_FB_6
5.6236e-08	-3.34143	0.333	0.01	0.00205829	healthy	TIMM50	Fibroblasts_FB_6
5.95102e-08	-2.5148	0.333	0.01	0.00217813	healthy	AFAP1L2	Fibroblasts_FB_6
5.95102e-08	-2.47838	0.333	0.01	0.00217813	healthy	ESRRB	Fibroblasts_FB_6
6.85246e-08	-2.19182	0.333	0.01	0.00250807	healthy	NTMT1	Fibroblasts_FB_6
1.05539e-07	-3.33306	0.333	0.011	0.00386284	healthy	ATPSCKMT	Fibroblasts_FB_6
1.14429e-07	-2.87402	0.667	0.045	0.0041882	healthy	ARID4A	Fibroblasts_FB_6
1.14503e-07	-2.46065	0.333	0.011	0.00419093	healthy	GCDH	Fibroblasts_FB_6
2.04252e-07	-2.20561	0.333	0.011	0.00747582	healthy	MVD	Fibroblasts_FB_6
2.09654e-07	-2.19223	0.333	0.011	0.00767353	healthy	AC005253.1	Fibroblasts_FB_6
2.267e-07	-2.124	0.333	0.011	0.00829745	healthy	IFITM2	Fibroblasts_FB_6
2.45082e-07	-2.14029	0.333	0.011	0.00897025	healthy	SGCA	Fibroblasts_FB_6
2.78963e-07	-1.91219	0.333	0.011	0.0102103	healthy	CXCL2	Fibroblasts_FB_6
3.23859e-07	-3.31108	0.333	0.012	0.0118536	healthy	MAPK3	Fibroblasts_FB_6
3.49292e-07	-2.46807	0.333	0.012	0.0127844	healthy	LRP10	Fibroblasts_FB_6
3.79206e-07	-3.16199	0.667	0.048	0.0138793	healthy	CD248	Fibroblasts_FB_6
5.21882e-07	-3.33041	0.333	0.012	0.0191014	healthy	ADHFE1	Fibroblasts_FB_6
6.4932e-07	-2.15546	0.333	0.012	0.0237658	healthy	AKR7A2	Fibroblasts_FB_6
8.94536e-07	-2.46796	0.333	0.013	0.0327409	healthy	PITHD1	Fibroblasts_FB_6
9.15786e-07	-2.47294	0.333	0.013	0.0335187	healthy	CREBL2	Fibroblasts_FB_6
1.32101e-06	-3.30926	0.333	0.013	0.0483501	healthy	TMEM69	Fibroblasts_FB_6
1.35141e-06	-2.48526	0.333	0.013	0.0494628	healthy	AAR2	Fibroblasts_FB_6
1.35141e-06	-2.46358	0.333	0.013	0.0494628	healthy	CEP250	Fibroblasts_FB_6
7.96267e-07	1.36531	0.458	0.078	0.0291442	duchenne	LAMA4	Fibroblasts_FB_0
4.26036e-39	-0.938852	0.039	0	1.55934e-34	healthy	TBX22	Fibroblasts_FB_0
4.26036e-39	-0.768482	0.039	0	1.55934e-34	healthy	LINC01238.1	Fibroblasts_FB_0
2.30555e-20	-0.729428	0.02	0	8.43855e-16	healthy	AMIGO1	Fibroblasts_FB_0
2.30555e-20	-0.729428	0.02	0	8.43855e-16	healthy	TFAP2A-AS1	Fibroblasts_FB_0
2.30555e-20	-0.729428	0.02	0	8.43855e-16	healthy	MRVI1	Fibroblasts_FB_0
2.30555e-20	-0.640277	0.02	0	8.43855e-16	healthy	AL354979.1	Fibroblasts_FB_0
2.30555e-20	-0.63156	0.02	0	8.43855e-16	healthy	AC078820.2	Fibroblasts_FB_0
2.30555e-20	-0.60548	0.02	0	8.43855e-16	healthy	AL135786.2	Fibroblasts_FB_0
2.30555e-20	-0.60548	0.02	0	8.43855e-16	healthy	LINC01146	Fibroblasts_FB_0
2.30555e-20	-0.544117	0.02	0	8.43855e-16	healthy	BPIFB4	Fibroblasts_FB_0
2.30555e-20	-0.530692	0.02	0	8.43855e-16	healthy	AC073325.1	Fibroblasts_FB_0
2.30555e-20	-0.486435	0.02	0	8.43855e-16	healthy	LINC01765	Fibroblasts_FB_0
2.30555e-20	-0.435798	0.02	0	8.43855e-16	healthy	AC002467.1	Fibroblasts_FB_0
2.30555e-20	-0.410931	0.02	0	8.43855e-16	healthy	VSTM1	Fibroblasts_FB_0
2.30555e-20	-0.395881	0.02	0	8.43855e-16	healthy	SIGLECL1	Fibroblasts_FB_0
2.30555e-20	-0.388228	0.02	0	8.43855e-16	healthy	LINC01214	Fibroblasts_FB_0
2.30555e-20	-0.388228	0.02	0	8.43855e-16	healthy	SLC22A16	Fibroblasts_FB_0
2.30555e-20	-0.378305	0.02	0	8.43855e-16	healthy	TNFRSF11B	Fibroblasts_FB_0
2.30555e-20	-0.378305	0.02	0	8.43855e-16	healthy	AC091180.2	Fibroblasts_FB_0
2.30555e-20	-0.378305	0.02	0	8.43855e-16	healthy	AC011477.3	Fibroblasts_FB_0
2.30555e-20	-0.371805	0.02	0	8.43855e-16	healthy	AC111197.1	Fibroblasts_FB_0
2.30555e-20	-0.298505	0.02	0	8.43855e-16	healthy	TNFRSF9	Fibroblasts_FB_0
2.30555e-20	-0.298505	0.02	0	8.43855e-16	healthy	MRGPRF-AS1	Fibroblasts_FB_0
2.30555e-20	-0.298505	0.02	0	8.43855e-16	healthy	STYK1	Fibroblasts_FB_0
2.30555e-20	-0.292618	0.02	0	8.43855e-16	healthy	AC073869.5	Fibroblasts_FB_0
2.30555e-20	-0.292618	0.02	0	8.43855e-16	healthy	AC069148.1	Fibroblasts_FB_0
2.30555e-20	-0.279285	0.02	0	8.43855e-16	healthy	UMODL1-AS1	Fibroblasts_FB_0
6.06301e-20	-0.916105	0.039	0	2.21912e-15	healthy	AC005165.1	Fibroblasts_FB_0
1.48055e-19	-1.06501	0.059	0.001	5.41896e-15	healthy	KCNN1	Fibroblasts_FB_0
4.07969e-16	-0.796733	0.039	0.001	1.49321e-11	healthy	CYP4A22	Fibroblasts_FB_0
4.20946e-16	-0.943244	0.039	0.001	1.54071e-11	healthy	HS3ST2	Fibroblasts_FB_0
1.07492e-11	-0.803428	0.039	0.001	3.93433e-07	healthy	ZNF582-AS1	Fibroblasts_FB_0
1.0991e-11	-0.873666	0.039	0.001	4.02283e-07	healthy	AL596325.2	Fibroblasts_FB_0
1.0991e-11	-0.743763	0.039	0.001	4.02283e-07	healthy	TRIM63	Fibroblasts_FB_0
1.01631e-10	-0.831776	0.02	0	3.7198e-06	healthy	AL162497.1	Fibroblasts_FB_0
1.01631e-10	-0.791408	0.02	0	3.7198e-06	healthy	HMGA1	Fibroblasts_FB_0
1.01631e-10	-0.781394	0.02	0	3.7198e-06	healthy	LINC00930	Fibroblasts_FB_0
1.01631e-10	-0.72502	0.02	0	3.7198e-06	healthy	AL136040.2	Fibroblasts_FB_0
1.01631e-10	-0.719575	0.02	0	3.7198e-06	healthy	AC093791.2	Fibroblasts_FB_0
1.01631e-10	-0.714776	0.02	0	3.7198e-06	healthy	FBXO2	Fibroblasts_FB_0
1.01631e-10	-0.702734	0.02	0	3.7198e-06	healthy	AP003721.1	Fibroblasts_FB_0
1.01631e-10	-0.668908	0.02	0	3.7198e-06	healthy	AC100821.2	Fibroblasts_FB_0
1.01631e-10	-0.63344	0.02	0	3.7198e-06	healthy	AC008982.2	Fibroblasts_FB_0
1.01631e-10	-0.625709	0.02	0	3.7198e-06	healthy	AC025449.2	Fibroblasts_FB_0
1.01631e-10	-0.611699	0.02	0	3.7198e-06	healthy	GADD45G	Fibroblasts_FB_0
1.01631e-10	-0.588314	0.02	0	3.7198e-06	healthy	NPR1	Fibroblasts_FB_0
1.01631e-10	-0.569362	0.02	0	3.7198e-06	healthy	VWA8-AS1	Fibroblasts_FB_0
1.01631e-10	-0.568696	0.02	0	3.7198e-06	healthy	AC011450.1	Fibroblasts_FB_0
1.01631e-10	-0.566621	0.02	0	3.7198e-06	healthy	PRKCZ-AS1	Fibroblasts_FB_0
1.01631e-10	-0.526892	0.02	0	3.7198e-06	healthy	EPHA1	Fibroblasts_FB_0
1.01631e-10	-0.511437	0.02	0	3.7198e-06	healthy	LINC01655	Fibroblasts_FB_0
1.01631e-10	-0.481293	0.02	0	3.7198e-06	healthy	BAALC	Fibroblasts_FB_0
1.01631e-10	-0.480034	0.02	0	3.7198e-06	healthy	AL034427.1	Fibroblasts_FB_0
1.01631e-10	-0.432977	0.02	0	3.7198e-06	healthy	RTL8B	Fibroblasts_FB_0
1.01631e-10	-0.431645	0.02	0	3.7198e-06	healthy	SLC9C2	Fibroblasts_FB_0
1.01631e-10	-0.393178	0.02	0	3.7198e-06	healthy	AC010999.2	Fibroblasts_FB_0
1.01631e-10	-0.368853	0.02	0	3.7198e-06	healthy	ACSM5	Fibroblasts_FB_0
1.01631e-10	-0.368805	0.02	0	3.7198e-06	healthy	LINC00390	Fibroblasts_FB_0
1.01631e-10	-0.30689	0.02	0	3.7198e-06	healthy	AC093725.2	Fibroblasts_FB_0
1.01631e-10	-0.295446	0.02	0	3.7198e-06	healthy	AC025031.2	Fibroblasts_FB_0
1.01631e-10	-0.289755	0.02	0	3.7198e-06	healthy	ZNF676	Fibroblasts_FB_0
1.03666e-10	-0.508197	0.02	0	3.79427e-06	healthy	HRCT1	Fibroblasts_FB_0
1.03666e-10	-0.47949	0.02	0	3.79427e-06	healthy	AC109347.2	Fibroblasts_FB_0
1.03666e-10	-0.474797	0.02	0	3.79427e-06	healthy	LINC02015	Fibroblasts_FB_0
1.03666e-10	-0.388757	0.02	0	3.79427e-06	healthy	LMNB1-DT	Fibroblasts_FB_0
1.03666e-10	-0.372068	0.02	0	3.79427e-06	healthy	AL133244.2	Fibroblasts_FB_0
1.03666e-10	-0.274222	0.02	0	3.79427e-06	healthy	CXCL16	Fibroblasts_FB_0
1.03666e-10	-0.272552	0.02	0	3.79427e-06	healthy	IL10RA	Fibroblasts_FB_0
1.03666e-10	-0.271414	0.02	0	3.79427e-06	healthy	AC006296.3	Fibroblasts_FB_0
1.55807e-10	-1.28178	0.078	0.006	5.70267e-06	healthy	KIAA1671	Fibroblasts_FB_0
2.54661e-10	-1.05615	0.039	0.001	9.32085e-06	healthy	IRX3	Fibroblasts_FB_0
3.12429e-09	-0.864752	0.039	0.002	0.000114352	healthy	ZNF672	Fibroblasts_FB_0
3.27567e-09	-0.749272	0.039	0.002	0.000119893	healthy	AC092958.1	Fibroblasts_FB_0
3.33247e-09	-0.669012	0.039	0.002	0.000121972	healthy	XIST	Fibroblasts_FB_0
6.04139e-09	-1.0952	0.059	0.004	0.000221121	healthy	ATXN7L3	Fibroblasts_FB_0
1.70118e-08	-0.833148	0.059	0.004	0.00062265	healthy	SLCO2B1	Fibroblasts_FB_0
2.27975e-08	-1.06772	0.039	0.002	0.000834412	healthy	MMACHC	Fibroblasts_FB_0
2.35129e-08	-0.920558	0.039	0.002	0.000860597	healthy	LINC01563	Fibroblasts_FB_0
2.35129e-08	-0.798221	0.039	0.002	0.000860597	healthy	RNF187	Fibroblasts_FB_0
1.20955e-07	-1.26236	0.039	0.002	0.00442708	healthy	FZD2	Fibroblasts_FB_0
1.23521e-07	-0.491395	0.039	0.002	0.004521	healthy	AC008760.1	Fibroblasts_FB_0
1.25261e-07	-0.480772	0.039	0.002	0.00458468	healthy	AC010735.2	Fibroblasts_FB_0
1.81224e-07	-0.724172	0.02	0	0.00663298	healthy	AL139042.1	Fibroblasts_FB_0
1.81224e-07	-0.720927	0.02	0	0.00663298	healthy	LRRC3	Fibroblasts_FB_0
1.81224e-07	-0.701984	0.02	0	0.00663298	healthy	LRRIQ1	Fibroblasts_FB_0
1.81224e-07	-0.665456	0.02	0	0.00663298	healthy	AC091151.5	Fibroblasts_FB_0
1.81224e-07	-0.663352	0.02	0	0.00663298	healthy	RECQL4	Fibroblasts_FB_0
1.81224e-07	-0.629379	0.02	0	0.00663298	healthy	OASL	Fibroblasts_FB_0
1.81224e-07	-0.598615	0.02	0	0.00663298	healthy	CHTF8	Fibroblasts_FB_0
1.81224e-07	-0.591824	0.02	0	0.00663298	healthy	CCDC189	Fibroblasts_FB_0
1.81224e-07	-0.585192	0.02	0	0.00663298	healthy	GRAMD2A	Fibroblasts_FB_0
1.81224e-07	-0.562357	0.02	0	0.00663298	healthy	GALNT14	Fibroblasts_FB_0
1.81224e-07	-0.507934	0.02	0	0.00663298	healthy	ZFR2	Fibroblasts_FB_0
1.81224e-07	-0.505367	0.02	0	0.00663298	healthy	AP000897.2	Fibroblasts_FB_0
1.81224e-07	-0.503497	0.02	0	0.00663298	healthy	PERP	Fibroblasts_FB_0
1.81224e-07	-0.477269	0.02	0	0.00663298	healthy	EFNB2	Fibroblasts_FB_0
1.83634e-07	-0.553839	0.02	0	0.0067212	healthy	CAMTA1-DT	Fibroblasts_FB_0
1.83634e-07	-0.543308	0.02	0	0.0067212	healthy	FBXO48	Fibroblasts_FB_0
1.83634e-07	-0.541878	0.02	0	0.0067212	healthy	HSH2D	Fibroblasts_FB_0
1.83634e-07	-0.374725	0.02	0	0.0067212	healthy	INHBA-AS1	Fibroblasts_FB_0
1.83634e-07	-0.36301	0.02	0	0.0067212	healthy	LINC01449	Fibroblasts_FB_0
1.83634e-07	-0.362061	0.02	0	0.0067212	healthy	AC005358.1	Fibroblasts_FB_0
1.83634e-07	-0.323414	0.02	0	0.0067212	healthy	PRR22	Fibroblasts_FB_0
1.86075e-07	-0.377009	0.02	0	0.00681055	healthy	AC004067.1	Fibroblasts_FB_0
1.86075e-07	-0.367726	0.02	0	0.00681055	healthy	AL353593.3	Fibroblasts_FB_0
1.86075e-07	-0.362446	0.02	0	0.00681055	healthy	TMEM217	Fibroblasts_FB_0
1.86075e-07	-0.297401	0.02	0	0.00681055	healthy	AL109838.1	Fibroblasts_FB_0
1.86075e-07	-0.294575	0.02	0	0.00681055	healthy	AC022874.1	Fibroblasts_FB_0
1.86075e-07	-0.28848	0.02	0	0.00681055	healthy	TMEM86A	Fibroblasts_FB_0
1.86075e-07	-0.282536	0.02	0	0.00681055	healthy	AC073648.7	Fibroblasts_FB_0
1.86075e-07	-0.28184	0.02	0	0.00681055	healthy	AC012213.3	Fibroblasts_FB_0
1.86075e-07	-0.280473	0.02	0	0.00681055	healthy	LINC01547	Fibroblasts_FB_0
1.86075e-07	-0.272939	0.02	0	0.00681055	healthy	LINC01081	Fibroblasts_FB_0
2.03643e-07	-1.31349	0.118	0.018	0.00745355	healthy	CACNA2D3	Fibroblasts_FB_0
4.75178e-07	-0.730832	0.039	0.002	0.017392	healthy	KIF21A	Fibroblasts_FB_0
4.84384e-07	-0.71067	0.039	0.002	0.0177289	healthy	ARIH2OS	Fibroblasts_FB_0
5.3443e-07	-1.99313	0.157	0.032	0.0195607	healthy	PER1	Fibroblasts_FB_0
3.71756e-25	1.24633	0.733	0.415	1.36066e-20	duchenne	GPC6	Satellite cells_SC_1
2.57134e-21	1.36766	0.523	0.222	9.41137e-17	duchenne	XIST	Satellite cells_SC_1
2.2577e-15	0.606457	0.969	0.918	8.2634e-11	duchenne	CADM2	Satellite cells_SC_1
1.39354e-14	1.4011	0.24	0.06	5.10049e-10	duchenne	PDE1A	Satellite cells_SC_1
5.0155e-14	1.28301	0.271	0.078	1.83572e-09	duchenne	KIF16B	Satellite cells_SC_1
3.38577e-12	1.30346	0.364	0.162	1.23922e-07	duchenne	TMEFF2	Satellite cells_SC_1
5.71949e-11	1.15958	0.302	0.122	2.09339e-06	duchenne	PITPNC1	Satellite cells_SC_1
1.77093e-09	1.21695	0.14	0.032	6.48179e-05	duchenne	STK24	Satellite cells_SC_1
3.36439e-09	0.974778	0.341	0.16	0.00012314	duchenne	PDE4D	Satellite cells_SC_1
5.08011e-09	0.754355	0.496	0.282	0.000185937	duchenne	ARHGAP24	Satellite cells_SC_1
2.18875e-08	0.689551	0.647	0.456	0.000801106	duchenne	SPATS2L	Satellite cells_SC_1
5.01806e-08	0.972266	0.213	0.081	0.00183666	duchenne	ITIH5	Satellite cells_SC_1
1.98686e-07	0.953591	0.116	0.029	0.0072721	duchenne	BMP6	Satellite cells_SC_1
2.70291e-07	0.734718	0.349	0.187	0.00989292	duchenne	PBX1	Satellite cells_SC_1
7.04749e-07	1.10761	0.05	0.003	0.0257945	duchenne	NR2F2-AS1	Satellite cells_SC_1
1.1928e-06	0.956276	0.333	0.189	0.0436576	duchenne	FOXN3	Satellite cells_SC_1
2.16632e-13	-2.44971	0.204	0.012	7.92893e-09	healthy	LINC01239	Satellite cells_SC_1
4.94166e-13	-1.39757	0.431	0.186	1.8087e-08	healthy	NAV2	Satellite cells_SC_1
5.05574e-12	-1.69419	0.355	0.136	1.85045e-07	healthy	FN1	Satellite cells_SC_1
1.52374e-07	-1.13984	0.214	0.066	0.00557706	healthy	DLK1	Satellite cells_SC_1
2.88608e-07	-0.764266	0.507	0.329	0.0105633	healthy	TRDN	Satellite cells_SC_1
7.62629e-07	-1.04243	0.406	0.244	0.027913	healthy	DIRC3	Satellite cells_SC_1
5.47293e-27	1.53886	0.613	0.181	2.00315e-22	duchenne	ZNF385D	Fibroblasts_FB_4
1.75732e-24	1.54173	0.62	0.211	6.43198e-20	duchenne	KCND2	Fibroblasts_FB_4
1.58156e-21	1.44529	0.585	0.211	5.78866e-17	duchenne	LHFPL6	Fibroblasts_FB_4
7.59288e-19	1.47519	0.693	0.362	2.77907e-14	duchenne	COL1A1	Fibroblasts_FB_4
7.74125e-17	0.847597	0.858	0.588	2.83338e-12	duchenne	COL1A2	Fibroblasts_FB_4
8.03436e-17	1.34793	0.546	0.216	2.94066e-12	duchenne	ROBO2	Fibroblasts_FB_4
2.27973e-16	1.39803	0.484	0.171	8.34404e-12	duchenne	PRKG1	Fibroblasts_FB_4
4.02175e-16	1.15238	0.517	0.181	1.472e-11	duchenne	LAMA4	Fibroblasts_FB_4
4.07433e-15	1.61764	0.38	0.101	1.49124e-10	duchenne	SGCD	Fibroblasts_FB_4
4.5626e-15	1.02878	0.724	0.417	1.66996e-10	duchenne	COL3A1	Fibroblasts_FB_4
6.56449e-15	1.1631	0.452	0.141	2.40267e-10	duchenne	ABCA10	Fibroblasts_FB_4
1.91485e-13	1.0735	0.527	0.241	7.00853e-09	duchenne	BICC1	Fibroblasts_FB_4
2.46309e-12	0.781645	0.604	0.322	9.01515e-08	duchenne	PLAGL1	Fibroblasts_FB_4
4.32892e-12	0.831151	0.683	0.417	1.58443e-07	duchenne	TSHZ2	Fibroblasts_FB_4
1.36226e-11	1.16209	0.414	0.156	4.98602e-07	duchenne	TPST1	Fibroblasts_FB_4
1.37415e-11	1.3338	0.338	0.095	5.02953e-07	duchenne	PRICKLE1	Fibroblasts_FB_4
2.69908e-11	1.53391	0.253	0.04	9.8789e-07	duchenne	STAC	Fibroblasts_FB_4
4.4374e-11	0.911707	0.532	0.261	1.62413e-06	duchenne	LRMDA	Fibroblasts_FB_4
4.75895e-11	1.15357	0.427	0.181	1.74182e-06	duchenne	COL14A1	Fibroblasts_FB_4
1.6752e-10	1.008	0.392	0.156	6.1314e-06	duchenne	ESR1	Fibroblasts_FB_4
1.70599e-10	0.925276	0.435	0.181	6.24411e-06	duchenne	PDGFRA	Fibroblasts_FB_4
2.60136e-10	1.17904	0.352	0.121	9.52124e-06	duchenne	ADAMTSL1	Fibroblasts_FB_4
3.26149e-10	1.03452	0.313	0.09	1.19374e-05	duchenne	SVIL	Fibroblasts_FB_4
4.30382e-10	1.26991	0.322	0.106	1.57524e-05	duchenne	LDB2	Fibroblasts_FB_4
6.98222e-10	1.89726	0.182	0.01	2.55556e-05	duchenne	LINGO2	Fibroblasts_FB_4
1.01965e-09	0.874749	0.488	0.246	3.73201e-05	duchenne	ADAMTSL3	Fibroblasts_FB_4
1.05198e-09	0.506926	0.877	0.693	3.85035e-05	duchenne	EBF1	Fibroblasts_FB_4
1.24208e-09	1.13477	0.295	0.085	4.54614e-05	duchenne	SNED1	Fibroblasts_FB_4
1.28949e-09	0.954201	0.363	0.136	4.71966e-05	duchenne	CDK14	Fibroblasts_FB_4
2.39786e-09	1.52195	0.21	0.035	8.77641e-05	duchenne	AC062004.1	Fibroblasts_FB_4
2.57691e-09	1.03186	0.259	0.065	9.43176e-05	duchenne	PDZRN3	Fibroblasts_FB_4
1.17018e-08	0.639242	0.457	0.226	0.000428298	duchenne	COL5A2	Fibroblasts_FB_4
1.47163e-08	1.32814	0.21	0.04	0.000538633	duchenne	PLCG2	Fibroblasts_FB_4
2.16169e-08	0.762467	0.488	0.261	0.000791199	duchenne	PRRX1	Fibroblasts_FB_4
2.54194e-08	1.3914	0.18	0.025	0.000930375	duchenne	COLEC12	Fibroblasts_FB_4
2.79253e-08	0.818641	0.3	0.101	0.00102209	duchenne	PPFIBP1	Fibroblasts_FB_4
2.9269e-08	0.725155	0.454	0.236	0.00107127	duchenne	LINC00882	Fibroblasts_FB_4
3.84235e-08	0.905756	0.391	0.191	0.00140634	duchenne	HMCN1	Fibroblasts_FB_4
4.60461e-08	0.581081	0.462	0.231	0.00168533	duchenne	DLG2	Fibroblasts_FB_4
5.45679e-08	0.535679	0.496	0.261	0.00199724	duchenne	DPYD	Fibroblasts_FB_4
5.5664e-08	1.8163	0.14	0.005	0.00203736	duchenne	MGAT4C	Fibroblasts_FB_4
6.48857e-08	0.449196	0.842	0.653	0.00237488	duchenne	RORA	Fibroblasts_FB_4
1.02338e-07	1.02446	0.197	0.04	0.00374568	duchenne	CDON	Fibroblasts_FB_4
1.1613e-07	0.545777	0.728	0.508	0.00425046	duchenne	MIR99AHG	Fibroblasts_FB_4
1.50501e-07	0.426375	0.779	0.543	0.00550848	duchenne	AUTS2	Fibroblasts_FB_4
1.6997e-07	1.03688	0.226	0.065	0.00622107	duchenne	TANC2	Fibroblasts_FB_4
2.10967e-07	0.871687	0.283	0.106	0.00772161	duchenne	ZFHX4	Fibroblasts_FB_4
2.1847e-07	0.702304	0.341	0.141	0.00799623	duchenne	KCNQ1OT1	Fibroblasts_FB_4
2.3198e-07	0.748513	0.225	0.06	0.00849069	duchenne	UTY	Fibroblasts_FB_4
2.40185e-07	1.13655	0.149	0.015	0.00879101	duchenne	FGF7	Fibroblasts_FB_4
2.49182e-07	0.666293	0.343	0.141	0.0091203	duchenne	FREM1	Fibroblasts_FB_4
2.8019e-07	0.829636	0.26	0.085	0.0102552	duchenne	CAMK2D	Fibroblasts_FB_4
2.96472e-07	1.17467	0.162	0.025	0.0108512	duchenne	PLCE1	Fibroblasts_FB_4
2.98674e-07	0.694363	0.252	0.08	0.0109318	duchenne	PLD1	Fibroblasts_FB_4
3.01094e-07	1.25635	0.169	0.03	0.0110203	duchenne	ADAMTS12	Fibroblasts_FB_4
3.479e-07	0.931627	0.211	0.055	0.0127335	duchenne	NR2F2-AS1	Fibroblasts_FB_4
3.72778e-07	0.663903	0.33	0.136	0.013644	duchenne	PBX1	Fibroblasts_FB_4
5.21887e-07	0.704796	0.365	0.176	0.0191016	duchenne	AL109930.1	Fibroblasts_FB_4
7.72521e-07	0.75794	0.431	0.236	0.028275	duchenne	PDE7B	Fibroblasts_FB_4
7.86524e-07	0.678592	0.446	0.241	0.0287876	duchenne	PDGFD	Fibroblasts_FB_4
1.17492e-06	1.08932	0.159	0.03	0.0430031	duchenne	LINC00174	Fibroblasts_FB_4
1.1759e-06	1.18922	0.134	0.015	0.0430389	duchenne	NCALD	Fibroblasts_FB_4
1.21723e-06	0.988824	0.268	0.106	0.0445519	duchenne	RAD51B	Fibroblasts_FB_4
2.25223e-43	-1.68989	0.146	0.009	8.2434e-39	healthy	XIST	Fibroblasts_FB_4
2.50207e-23	-1.03375	0.889	0.787	9.15783e-19	healthy	FBN1	Fibroblasts_FB_4
1.9492e-16	-1.34481	0.538	0.324	7.13428e-12	healthy	CFD	Fibroblasts_FB_4
5.16515e-16	-1.42263	0.106	0.017	1.8905e-11	healthy	DUXAP8	Fibroblasts_FB_4
1.89125e-15	-0.665929	0.04	0.002	6.92215e-11	healthy	MSTN	Fibroblasts_FB_4
2.41503e-13	-1.02407	0.643	0.497	8.83923e-09	healthy	MFAP5	Fibroblasts_FB_4
3.41754e-13	-1.11768	0.08	0.012	1.25085e-08	healthy	TMEM233	Fibroblasts_FB_4
6.75571e-13	-1.43492	0.352	0.172	2.47266e-08	healthy	ZBTB16	Fibroblasts_FB_4
2.17263e-12	-0.929165	0.754	0.686	7.95205e-08	healthy	TNXB	Fibroblasts_FB_4
4.83267e-12	-0.676905	0.824	0.754	1.76881e-07	healthy	RBMS3	Fibroblasts_FB_4
6.4873e-12	-1.41182	0.151	0.043	2.37442e-07	healthy	FKBP5	Fibroblasts_FB_4
6.4892e-12	-0.393702	0.025	0.001	2.37511e-07	healthy	IL15	Fibroblasts_FB_4
2.163e-11	-1.57021	0.176	0.059	7.91681e-07	healthy	GALNT15	Fibroblasts_FB_4
2.80633e-10	-1.49225	0.236	0.101	1.02714e-05	healthy	IGFBP6	Fibroblasts_FB_4
9.00867e-10	-0.823795	0.734	0.666	3.29726e-05	healthy	TRIO	Fibroblasts_FB_4
1.14358e-09	-1.09304	0.397	0.238	4.1856e-05	healthy	LTBP4	Fibroblasts_FB_4
3.2477e-09	-1.03191	0.302	0.153	0.000118869	healthy	GUCY1A2	Fibroblasts_FB_4
9.85065e-09	-1.10437	0.171	0.065	0.000360544	healthy	PRG4	Fibroblasts_FB_4
1.70326e-08	-0.964047	0.553	0.449	0.000623411	healthy	EGFR	Fibroblasts_FB_4
2.35825e-08	-1.0776	0.477	0.341	0.000863144	healthy	MT-CO3	Fibroblasts_FB_4
9.81446e-08	-1.02068	0.241	0.12	0.00359219	healthy	CD248	Fibroblasts_FB_4
1.23263e-07	-0.363338	0.01	0	0.00451155	healthy	LINC01068	Fibroblasts_FB_4
1.23263e-07	-0.238337	0.01	0	0.00451155	healthy	CFAP57	Fibroblasts_FB_4
1.23263e-07	-0.217894	0.01	0	0.00451155	healthy	AC011306.1	Fibroblasts_FB_4
1.23263e-07	-0.214213	0.01	0	0.00451155	healthy	AC068389.1	Fibroblasts_FB_4
1.23263e-07	-0.195038	0.01	0	0.00451155	healthy	FGFBP2	Fibroblasts_FB_4
1.23263e-07	-0.16266	0.01	0	0.00451155	healthy	AC092142.1	Fibroblasts_FB_4
1.23263e-07	-0.158703	0.01	0	0.00451155	healthy	GUCY2F	Fibroblasts_FB_4
1.23263e-07	-0.156339	0.01	0	0.00451155	healthy	AL133215.2	Fibroblasts_FB_4
1.23263e-07	-0.131795	0.01	0	0.00451155	healthy	SLC2A2	Fibroblasts_FB_4
1.23263e-07	-0.0950571	0.01	0	0.00451155	healthy	NSG2	Fibroblasts_FB_4
2.15731e-07	-0.429664	0.03	0.003	0.00789599	healthy	MZT1	Fibroblasts_FB_4
2.23537e-07	-0.691645	0.688	0.608	0.0081817	healthy	DOCK4	Fibroblasts_FB_4
2.52652e-07	-0.266721	0.025	0.002	0.00924733	healthy	TSIX	Fibroblasts_FB_4
5.08422e-07	-0.891997	0.08	0.022	0.0186087	healthy	CYP4B1	Fibroblasts_FB_4
6.7116e-07	-1.14092	0.382	0.267	0.0245651	healthy	COL12A1	Fibroblasts_FB_4
1.27752e-06	-0.949865	0.055	0.012	0.0467586	healthy	VASN	Fibroblasts_FB_4
3.99097e-181	-1.89	0.2	0	1.46073e-176	healthy	CACNA1F	Fibroblasts_FB_1
3.99097e-181	-1.49307	0.2	0	1.46073e-176	healthy	IRF4	Fibroblasts_FB_1
3.99097e-181	-1.21747	0.2	0	1.46073e-176	healthy	AC006483.2	Fibroblasts_FB_1
3.99097e-181	-1.21747	0.2	0	1.46073e-176	healthy	ADM5	Fibroblasts_FB_1
3.99097e-181	-1.16049	0.2	0	1.46073e-176	healthy	VNN2	Fibroblasts_FB_1
3.99097e-181	-1.16049	0.2	0	1.46073e-176	healthy	CACNA1C-AS4	Fibroblasts_FB_1
2.11168e-91	-1.21612	0.2	0	7.72895e-87	healthy	FABP1	Fibroblasts_FB_1
2.11168e-91	-1.15934	0.2	0	7.72895e-87	healthy	CD70	Fibroblasts_FB_1
2.57983e-91	-1.21068	0.2	0	9.44243e-87	healthy	MESTIT1	Fibroblasts_FB_1
1.86289e-61	-1.8872	0.2	0	6.81838e-57	healthy	RRS1	Fibroblasts_FB_1
2.12908e-61	-1.21246	0.2	0	7.79264e-57	healthy	XIST	Fibroblasts_FB_1
2.43314e-61	-1.21249	0.2	0	8.90553e-57	healthy	SNURF	Fibroblasts_FB_1
2.43314e-61	-1.15028	0.2	0	8.90553e-57	healthy	AC012499.1	Fibroblasts_FB_1
1.82513e-46	-1.92481	0.2	0.001	6.68017e-42	healthy	AC010332.3	Fibroblasts_FB_1
2.23008e-46	-1.20992	0.2	0.001	8.1623e-42	healthy	PNMA8A	Fibroblasts_FB_1
2.23008e-46	-1.20927	0.2	0.001	8.1623e-42	healthy	AC006504.7	Fibroblasts_FB_1
2.23008e-46	-1.2085	0.2	0.001	8.1623e-42	healthy	TEX46	Fibroblasts_FB_1
2.17014e-37	-1.20677	0.2	0.001	7.94295e-33	healthy	LGR5	Fibroblasts_FB_1
2.3512e-37	-1.20303	0.2	0.001	8.60563e-33	healthy	DNAJB5	Fibroblasts_FB_1
2.3512e-37	-1.15021	0.2	0.001	8.60563e-33	healthy	CACNG8	Fibroblasts_FB_1
1.9047e-32	-2.26926	0.4	0.005	6.97139e-28	healthy	MYO16	Fibroblasts_FB_1
1.89557e-31	-2.6668	0.2	0.001	6.93796e-27	healthy	MYO16-AS1	Fibroblasts_FB_1
2.16675e-31	-1.47905	0.2	0.001	7.93054e-27	healthy	FAM163A	Fibroblasts_FB_1
2.16675e-31	-1.4781	0.2	0.001	7.93054e-27	healthy	ARL4C	Fibroblasts_FB_1
2.16675e-31	-1.20381	0.2	0.001	7.93054e-27	healthy	GPR63	Fibroblasts_FB_1
2.31646e-31	-1.14987	0.2	0.001	8.47846e-27	healthy	BICDL1	Fibroblasts_FB_1
2.31646e-31	-1.14861	0.2	0.001	8.47846e-27	healthy	AC005005.4	Fibroblasts_FB_1
2.31646e-31	-1.1446	0.2	0.001	8.47846e-27	healthy	SDSL	Fibroblasts_FB_1
3.77024e-27	-1.91529	0.2	0.001	1.37994e-22	healthy	AC008496.3	Fibroblasts_FB_1
4.2283e-27	-1.47944	0.2	0.001	1.5476e-22	healthy	LINC02709	Fibroblasts_FB_1
4.2283e-27	-1.47657	0.2	0.001	1.5476e-22	healthy	LINC00707	Fibroblasts_FB_1
4.47762e-27	-1.47428	0.2	0.001	1.63885e-22	healthy	AC090993.1	Fibroblasts_FB_1
4.47762e-27	-1.14537	0.2	0.001	1.63885e-22	healthy	SHISA9	Fibroblasts_FB_1
4.47762e-27	-1.14395	0.2	0.001	1.63885e-22	healthy	AC074138.1	Fibroblasts_FB_1
4.7415e-27	-1.47033	0.2	0.001	1.73544e-22	healthy	AL023806.1	Fibroblasts_FB_1
4.7415e-27	-1.46986	0.2	0.001	1.73544e-22	healthy	LINC01381	Fibroblasts_FB_1
4.7415e-27	-1.1461	0.2	0.001	1.73544e-22	healthy	ANKRD62P1-PARP4P3	Fibroblasts_FB_1
5.0208e-27	-1.14306	0.2	0.001	1.83766e-22	healthy	CACNA1B	Fibroblasts_FB_1
5.3164e-27	-1.14552	0.2	0.001	1.94586e-22	healthy	MDFI	Fibroblasts_FB_1
6.69846e-24	-1.47669	0.2	0.002	2.4517e-19	healthy	UQCRHL	Fibroblasts_FB_1
7.04314e-24	-1.47295	0.2	0.002	2.57786e-19	healthy	AC013716.1	Fibroblasts_FB_1
8.60649e-24	-1.18843	0.2	0.002	3.15006e-19	healthy	GRM7-AS1	Fibroblasts_FB_1
2.07807e-21	-1.91228	0.2	0.002	7.60596e-17	healthy	C10orf90	Fibroblasts_FB_1
2.07807e-21	-1.87384	0.2	0.002	7.60596e-17	healthy	NDST1-AS1	Fibroblasts_FB_1
2.17295e-21	-1.90741	0.2	0.002	7.9532e-17	healthy	AC244102.4	Fibroblasts_FB_1
2.48403e-21	-1.47122	0.2	0.002	9.09181e-17	healthy	AC018648.1	Fibroblasts_FB_1
2.48403e-21	-1.14173	0.2	0.002	9.09181e-17	healthy	CCDC106	Fibroblasts_FB_1
2.59722e-21	-1.19496	0.2	0.002	9.50607e-17	healthy	ZNF485	Fibroblasts_FB_1
2.7155e-21	-1.19442	0.2	0.002	9.939e-17	healthy	AC008440.1	Fibroblasts_FB_1
2.7155e-21	-1.18936	0.2	0.002	9.939e-17	healthy	AC079052.1	Fibroblasts_FB_1
2.7155e-21	-1.14056	0.2	0.002	9.939e-17	healthy	AKAP3	Fibroblasts_FB_1
2.14202e-19	-1.90869	0.2	0.002	7.84001e-15	healthy	ELL3	Fibroblasts_FB_1
2.22987e-19	-1.86235	0.2	0.002	8.16156e-15	healthy	AC106795.3	Fibroblasts_FB_1
2.32129e-19	-1.86353	0.2	0.002	8.49615e-15	healthy	LPP-AS2	Fibroblasts_FB_1
2.4164e-19	-1.85847	0.2	0.002	8.84428e-15	healthy	SLC10A3	Fibroblasts_FB_1
2.4164e-19	-1.19941	0.2	0.002	8.84428e-15	healthy	AC010997.4	Fibroblasts_FB_1
9.90307e-18	-1.89938	0.2	0.002	3.62462e-13	healthy	AL583829.1	Fibroblasts_FB_1
1.14605e-17	-1.13495	0.2	0.002	4.19464e-13	healthy	AC005920.1	Fibroblasts_FB_1
1.14605e-17	-1.1372	0.2	0.002	4.19464e-13	healthy	ABCC5-AS1	Fibroblasts_FB_1
1.27849e-17	-1.13185	0.2	0.002	4.67939e-13	healthy	CBY3	Fibroblasts_FB_1
2.682e-16	-1.19139	0.2	0.003	9.8164e-12	healthy	WWC2-AS2	Fibroblasts_FB_1
3.64396e-15	-1.45904	0.2	0.003	1.33373e-10	healthy	AC025031.1	Fibroblasts_FB_1
3.75838e-15	-1.19148	0.2	0.003	1.3756e-10	healthy	N4BP3	Fibroblasts_FB_1
3.99793e-15	-1.18996	0.2	0.003	1.46328e-10	healthy	AC093843.2	Fibroblasts_FB_1
4.52302e-15	-1.18069	0.2	0.003	1.65547e-10	healthy	CYP4Z1	Fibroblasts_FB_1
2.12114e-14	-2.54432	0.8	0.051	7.76359e-10	healthy	EIF3J-DT	Fibroblasts_FB_1
3.41926e-14	-1.8966	0.2	0.003	1.25148e-09	healthy	AC016588.2	Fibroblasts_FB_1
3.51898e-14	-1.75858	0.2	0.003	1.28798e-09	healthy	PCDH17	Fibroblasts_FB_1
4.06213e-14	-1.12835	0.2	0.003	1.48678e-09	healthy	PLAC4	Fibroblasts_FB_1
4.30177e-14	-1.17793	0.2	0.003	1.57449e-09	healthy	GLRA2	Fibroblasts_FB_1
4.30177e-14	-1.12585	0.2	0.003	1.57449e-09	healthy	AC211486.2	Fibroblasts_FB_1
1.69828e-13	-2.20853	0.4	0.014	6.21588e-09	healthy	KLF2	Fibroblasts_FB_1
2.72832e-13	-1.88201	0.2	0.003	9.98591e-09	healthy	CD247	Fibroblasts_FB_1
2.95667e-13	-1.17913	0.2	0.003	1.08217e-08	healthy	BMP2	Fibroblasts_FB_1
2.95667e-13	-1.17695	0.2	0.003	1.08217e-08	healthy	AGRN	Fibroblasts_FB_1
3.20376e-13	-1.12152	0.2	0.003	1.17261e-08	healthy	LINC00653	Fibroblasts_FB_1
1.52163e-12	-1.84317	0.2	0.004	5.56932e-08	healthy	AC023034.1	Fibroblasts_FB_1
1.60012e-12	-1.74338	0.2	0.004	5.85659e-08	healthy	LRMP	Fibroblasts_FB_1
1.76919e-12	-1.17493	0.2	0.004	6.4754e-08	healthy	LINC01856	Fibroblasts_FB_1
1.86017e-12	-1.11581	0.2	0.004	6.80841e-08	healthy	TAS2R31	Fibroblasts_FB_1
6.62331e-12	-1.89405	0.2	0.004	2.4242e-07	healthy	DCUN1D3	Fibroblasts_FB_1
6.78227e-12	-1.88033	0.2	0.004	2.48238e-07	healthy	LAMC3	Fibroblasts_FB_1
8.19597e-12	-1.1162	0.2	0.004	2.99981e-07	healthy	DISP2	Fibroblasts_FB_1
8.59226e-12	-1.11824	0.2	0.004	3.14485e-07	healthy	HIST1H2BE	Fibroblasts_FB_1
1.43729e-11	-1.87651	0.4	0.016	5.26064e-07	healthy	AKAP6	Fibroblasts_FB_1
2.86898e-11	-2.84858	0.4	0.017	1.05008e-06	healthy	CRLF1	Fibroblasts_FB_1
3.35358e-11	-1.11424	0.2	0.004	1.22744e-06	healthy	LINC02242	Fibroblasts_FB_1
8.99602e-11	-1.84699	0.2	0.004	3.29263e-06	healthy	AC020594.1	Fibroblasts_FB_1
9.18912e-11	-1.83696	0.2	0.004	3.36331e-06	healthy	MAGEF1	Fibroblasts_FB_1
1.0659e-10	-1.16819	0.2	0.004	3.90131e-06	healthy	LINC02043	Fibroblasts_FB_1
1.08869e-10	-1.11077	0.2	0.004	3.98473e-06	healthy	AC009120.4	Fibroblasts_FB_1
1.15997e-10	-1.11465	0.2	0.004	4.2456e-06	healthy	AJAP1	Fibroblasts_FB_1
3.20937e-10	-1.44373	0.2	0.005	1.17466e-05	healthy	LINC00299	Fibroblasts_FB_1
3.27456e-10	-1.11585	0.2	0.005	1.19852e-05	healthy	TMEM17	Fibroblasts_FB_1
3.34104e-10	-1.16339	0.2	0.005	1.22285e-05	healthy	PRX	Fibroblasts_FB_1
3.47798e-10	-1.05531	0.2	0.005	1.27297e-05	healthy	AC120193.1	Fibroblasts_FB_1
3.54848e-10	-1.10927	0.2	0.005	1.29878e-05	healthy	AL662844.4	Fibroblasts_FB_1
3.62039e-10	-1.09806	0.2	0.005	1.3251e-05	healthy	AC008700.1	Fibroblasts_FB_1
3.85372e-10	-1.6493	0.4	0.018	1.4105e-05	healthy	TBCE	Fibroblasts_FB_1
5.09608e-10	-2.01398	0.6	0.041	1.86522e-05	healthy	MRI1	Fibroblasts_FB_1
8.77492e-10	-3.02178	0.4	0.02	3.21171e-05	healthy	TMEM71	Fibroblasts_FB_1
9.40345e-10	-1.10353	0.2	0.005	3.44176e-05	healthy	MIIP	Fibroblasts_FB_1
9.585e-10	-1.1603	0.2	0.005	3.50821e-05	healthy	AC009065.4	Fibroblasts_FB_1
9.76997e-10	-1.15702	0.2	0.005	3.5759e-05	healthy	AL121790.2	Fibroblasts_FB_1
9.76997e-10	-1.15087	0.2	0.005	3.5759e-05	healthy	AC073050.1	Fibroblasts_FB_1
1.90084e-09	-1.84019	0.2	0.005	6.95727e-05	healthy	RAMP2	Fibroblasts_FB_1
1.93606e-09	-1.80652	0.2	0.005	7.08616e-05	healthy	GATD3A	Fibroblasts_FB_1
2.32504e-09	-1.15959	0.2	0.005	8.50988e-05	healthy	GDPGP1	Fibroblasts_FB_1
2.36789e-09	-1.10681	0.2	0.005	8.6667e-05	healthy	SEMA6A-AS2	Fibroblasts_FB_1
2.4115e-09	-1.10379	0.2	0.005	8.82634e-05	healthy	SWSAP1	Fibroblasts_FB_1
3.05813e-09	-2.10227	0.4	0.021	0.000111931	healthy	ZNF699	Fibroblasts_FB_1
3.45978e-09	-2.11509	0.4	0.021	0.000126631	healthy	LHFPL5	Fibroblasts_FB_1
4.38615e-09	-1.86224	0.2	0.005	0.000160537	healthy	HBB	Fibroblasts_FB_1
4.78839e-09	-1.43868	0.2	0.005	0.00017526	healthy	NUDT17	Fibroblasts_FB_1
4.95914e-09	-1.11226	0.2	0.005	0.00018151	healthy	SPACA9	Fibroblasts_FB_1
5.22644e-09	-1.16004	0.2	0.005	0.000191293	healthy	TPRN	Fibroblasts_FB_1
5.22644e-09	-1.10249	0.2	0.005	0.000191293	healthy	AC068631.1	Fibroblasts_FB_1
5.50773e-09	-1.15661	0.2	0.005	0.000201588	healthy	AC007406.5	Fibroblasts_FB_1
5.70338e-09	-1.14859	0.2	0.005	0.000208749	healthy	DDIT4	Fibroblasts_FB_1
1.02771e-08	-1.4302	0.2	0.006	0.000376151	healthy	Z69733.1	Fibroblasts_FB_1
1.08081e-08	-1.4242	0.2	0.006	0.000395586	healthy	PPM1E	Fibroblasts_FB_1
1.17529e-08	-1.09488	0.2	0.006	0.000430166	healthy	PDLIM2	Fibroblasts_FB_1
1.88472e-08	-1.83364	0.2	0.006	0.000689827	healthy	AC068193.1	Fibroblasts_FB_1
1.91547e-08	-1.87626	0.2	0.006	0.00070108	healthy	LRRN2	Fibroblasts_FB_1
1.9467e-08	-1.86488	0.2	0.006	0.00071251	healthy	POP4	Fibroblasts_FB_1
2.01065e-08	-1.43627	0.2	0.006	0.000735917	healthy	DDX41	Fibroblasts_FB_1
2.0406e-08	-2.64922	0.4	0.023	0.000746879	healthy	CCDC196	Fibroblasts_FB_1
2.11041e-08	-1.42886	0.2	0.006	0.000772433	healthy	AC025048.4	Fibroblasts_FB_1
2.17958e-08	-1.42679	0.2	0.006	0.000797747	healthy	AC006064.1	Fibroblasts_FB_1
2.32457e-08	-1.15833	0.2	0.006	0.000850815	healthy	AL136114.1	Fibroblasts_FB_1
2.36225e-08	-1.08948	0.2	0.006	0.000864608	healthy	NAALADL2-AS1	Fibroblasts_FB_1
2.40053e-08	-1.09922	0.2	0.006	0.000878618	healthy	NABP2	Fibroblasts_FB_1
4.10345e-08	-1.42665	0.2	0.006	0.0015019	healthy	TMEM154	Fibroblasts_FB_1
4.43392e-08	-1.38493	0.2	0.006	0.00162286	healthy	SLC35F3	Fibroblasts_FB_1
4.50304e-08	-1.09592	0.2	0.006	0.00164816	healthy	RGL4	Fibroblasts_FB_1
4.71674e-08	-1.14728	0.2	0.006	0.00172637	healthy	LRFN4	Fibroblasts_FB_1
4.79013e-08	-1.08725	0.2	0.006	0.00175324	healthy	MFSD9	Fibroblasts_FB_1
4.94025e-08	-1.084	0.2	0.006	0.00180818	healthy	AC010168.2	Fibroblasts_FB_1
8.18892e-08	-1.14432	0.2	0.006	0.00299723	healthy	GADD45B	Fibroblasts_FB_1
8.43648e-08	-1.09529	0.2	0.006	0.00308784	healthy	ZNF225	Fibroblasts_FB_1
8.47166e-08	-2.0061	0.4	0.025	0.00310071	healthy	LINC00499	Fibroblasts_FB_1
8.56297e-08	-1.14812	0.2	0.006	0.00313413	healthy	AL157394.3	Fibroblasts_FB_1
8.56297e-08	-1.07346	0.2	0.006	0.00313413	healthy	LNCSRLR	Fibroblasts_FB_1
1.21851e-07	-1.81689	0.2	0.007	0.00445987	healthy	UNC5C	Fibroblasts_FB_1
1.51221e-07	-1.14261	0.2	0.007	0.00553485	healthy	AL731577.1	Fibroblasts_FB_1
1.97255e-07	-1.85793	0.2	0.007	0.00721974	healthy	RXRG	Fibroblasts_FB_1
2.23631e-07	-1.42345	0.2	0.007	0.00818513	healthy	POLR2J2	Fibroblasts_FB_1
2.23631e-07	-1.41344	0.2	0.007	0.00818513	healthy	AC114956.1	Fibroblasts_FB_1
2.43075e-07	-1.14244	0.2	0.007	0.0088968	healthy	ITM2C	Fibroblasts_FB_1
2.46471e-07	-1.1476	0.2	0.007	0.00902109	healthy	DPH1	Fibroblasts_FB_1
2.56935e-07	-1.13266	0.2	0.007	0.00940408	healthy	LRRC29	Fibroblasts_FB_1
2.64148e-07	-1.07809	0.2	0.007	0.00966808	healthy	AC107463.1	Fibroblasts_FB_1
3.31001e-07	-1.84915	0.2	0.007	0.012115	healthy	YJEFN3	Fibroblasts_FB_1
3.835e-07	-2.26426	0.4	0.028	0.0140365	healthy	TRPM2	Fibroblasts_FB_1
3.89038e-07	-1.1536	0.2	0.007	0.0142392	healthy	ERF	Fibroblasts_FB_1
4.05015e-07	-1.1465	0.2	0.007	0.0148239	healthy	CPT1C	Fibroblasts_FB_1
6.04337e-07	-1.08634	0.2	0.007	0.0221193	healthy	BTBD18	Fibroblasts_FB_1
6.20252e-07	-1.08727	0.2	0.007	0.0227018	healthy	ZNF436-AS1	Fibroblasts_FB_1
6.53303e-07	-1.12852	0.2	0.007	0.0239115	healthy	KSR2	Fibroblasts_FB_1
6.70458e-07	-1.07216	0.2	0.007	0.0245394	healthy	GRAMD1B	Fibroblasts_FB_1
6.97256e-07	-1.55008	0.4	0.028	0.0255203	healthy	DHTKD1	Fibroblasts_FB_1
7.85094e-07	-2.58929	0.2	0.008	0.0287352	healthy	DLGAP1-AS4	Fibroblasts_FB_1
7.96328e-07	-1.99655	0.4	0.029	0.0291464	healthy	AL109946.1	Fibroblasts_FB_1
8.05247e-07	-1.80222	0.2	0.008	0.0294728	healthy	GLIPR1L2	Fibroblasts_FB_1
9.97875e-07	-1.07847	0.2	0.008	0.0365232	healthy	TTC6	Fibroblasts_FB_1
1.04926e-06	-1.08114	0.2	0.008	0.0384041	healthy	EFHB	Fibroblasts_FB_1
1.17773e-06	-1.85557	0.2	0.008	0.0431061	healthy	PIGO	Fibroblasts_FB_1
1.20704e-06	-1.84417	0.2	0.008	0.044179	healthy	SERPINA5	Fibroblasts_FB_1
1.22196e-06	-1.83458	0.2	0.008	0.0447251	healthy	ART3	Fibroblasts_FB_1
1.23706e-06	-1.7774	0.2	0.008	0.0452777	healthy	CYP4X1	Fibroblasts_FB_1
1.36447e-06	-1.13817	0.2	0.008	0.0499408	healthy	AC089983.1	Fibroblasts_FB_1
3.84418e-10	2.71146	0.605	0.087	1.40701e-05	duchenne	HS3ST5	Satellite cells_SC_2A
1.63604e-41	-2.08896	0.109	0.001	5.98806e-37	healthy	TRHDE-AS1	Satellite cells_SC_2A
1.39309e-27	-1.3199	0.043	0	5.09884e-23	healthy	AC012636.1	Satellite cells_SC_2A
1.39309e-27	-1.26651	0.043	0	5.09884e-23	healthy	FMN2	Satellite cells_SC_2A
7.17337e-24	-1.50902	0.087	0.002	2.62553e-19	healthy	AL391117.1	Satellite cells_SC_2A
1.19114e-18	-1.40121	0.043	0	4.35971e-14	healthy	AC068446.2	Satellite cells_SC_2A
1.19114e-18	-1.12159	0.043	0	4.35971e-14	healthy	AC019257.1	Satellite cells_SC_2A
1.44334e-14	-1.61842	0.022	0	5.28277e-10	healthy	CXCL10	Satellite cells_SC_2A
1.44334e-14	-1.61842	0.022	0	5.28277e-10	healthy	MT1A	Satellite cells_SC_2A
1.44334e-14	-1.53536	0.022	0	5.28277e-10	healthy	AP001972.4	Satellite cells_SC_2A
1.44334e-14	-1.50311	0.022	0	5.28277e-10	healthy	KLRG2	Satellite cells_SC_2A
1.44334e-14	-1.15588	0.022	0	5.28277e-10	healthy	TMEM130	Satellite cells_SC_2A
1.44334e-14	-1.15588	0.022	0	5.28277e-10	healthy	NEFM	Satellite cells_SC_2A
1.44334e-14	-1.15588	0.022	0	5.28277e-10	healthy	CA8	Satellite cells_SC_2A
1.44334e-14	-1.15588	0.022	0	5.28277e-10	healthy	PVALB	Satellite cells_SC_2A
1.44334e-14	-0.991421	0.022	0	5.28277e-10	healthy	ZNHIT2	Satellite cells_SC_2A
1.44334e-14	-0.988173	0.022	0	5.28277e-10	healthy	CDA	Satellite cells_SC_2A
1.44334e-14	-0.988173	0.022	0	5.28277e-10	healthy	LINC01712	Satellite cells_SC_2A
1.44334e-14	-0.983342	0.022	0	5.28277e-10	healthy	AC004936.1	Satellite cells_SC_2A
1.44334e-14	-0.962961	0.022	0	5.28277e-10	healthy	BSPRY	Satellite cells_SC_2A
1.44334e-14	-0.962961	0.022	0	5.28277e-10	healthy	TESPA1	Satellite cells_SC_2A
1.44334e-14	-0.962961	0.022	0	5.28277e-10	healthy	TPSB2	Satellite cells_SC_2A
1.44334e-14	-0.962961	0.022	0	5.28277e-10	healthy	CD300A	Satellite cells_SC_2A
1.44334e-14	-0.962961	0.022	0	5.28277e-10	healthy	BTK	Satellite cells_SC_2A
1.44334e-14	-0.939048	0.022	0	5.28277e-10	healthy	AL591069.1	Satellite cells_SC_2A
1.44334e-14	-0.939048	0.022	0	5.28277e-10	healthy	AP001033.3	Satellite cells_SC_2A
1.44334e-14	-0.91911	0.022	0	5.28277e-10	healthy	NELL2	Satellite cells_SC_2A
1.44334e-14	-0.905395	0.022	0	5.28277e-10	healthy	OR6F1	Satellite cells_SC_2A
1.44334e-14	-0.886889	0.022	0	5.28277e-10	healthy	UVRAG-DT	Satellite cells_SC_2A
1.44334e-14	-0.854511	0.022	0	5.28277e-10	healthy	SELP	Satellite cells_SC_2A
1.44334e-14	-0.840374	0.022	0	5.28277e-10	healthy	KCNK15-AS1	Satellite cells_SC_2A
1.44334e-14	-0.764692	0.022	0	5.28277e-10	healthy	AC069133.1	Satellite cells_SC_2A
1.44334e-14	-0.757135	0.022	0	5.28277e-10	healthy	AADACL3	Satellite cells_SC_2A
1.44334e-14	-0.757135	0.022	0	5.28277e-10	healthy	INTS9-AS1	Satellite cells_SC_2A
1.44334e-14	-0.749729	0.022	0	5.28277e-10	healthy	AC016573.1	Satellite cells_SC_2A
1.44334e-14	-0.730106	0.022	0	5.28277e-10	healthy	LINC01554	Satellite cells_SC_2A
1.44334e-14	-0.730106	0.022	0	5.28277e-10	healthy	AC109441.1	Satellite cells_SC_2A
1.44334e-14	-0.730106	0.022	0	5.28277e-10	healthy	AL024498.1	Satellite cells_SC_2A
1.44334e-14	-0.730106	0.022	0	5.28277e-10	healthy	GPR63	Satellite cells_SC_2A
1.44334e-14	-0.730106	0.022	0	5.28277e-10	healthy	AC245427.1	Satellite cells_SC_2A
1.44334e-14	-0.730106	0.022	0	5.28277e-10	healthy	C8orf48	Satellite cells_SC_2A
1.44334e-14	-0.730106	0.022	0	5.28277e-10	healthy	SCX	Satellite cells_SC_2A
1.44334e-14	-0.723228	0.022	0	5.28277e-10	healthy	AC254562.2	Satellite cells_SC_2A
1.44334e-14	-0.683065	0.022	0	5.28277e-10	healthy	LINC00517	Satellite cells_SC_2A
1.44334e-14	-0.678548	0.022	0	5.28277e-10	healthy	TGM3	Satellite cells_SC_2A
1.44334e-14	-0.623656	0.022	0	5.28277e-10	healthy	ANO9	Satellite cells_SC_2A
1.44334e-14	-0.623656	0.022	0	5.28277e-10	healthy	DUSP15	Satellite cells_SC_2A
1.44334e-14	-0.579249	0.022	0	5.28277e-10	healthy	LINC01510	Satellite cells_SC_2A
1.44334e-14	-0.579249	0.022	0	5.28277e-10	healthy	AL589794.2	Satellite cells_SC_2A
1.44334e-14	-0.568608	0.022	0	5.28277e-10	healthy	AC087428.1	Satellite cells_SC_2A
1.44334e-14	-0.568608	0.022	0	5.28277e-10	healthy	AC004593.2	Satellite cells_SC_2A
1.44334e-14	-0.568608	0.022	0	5.28277e-10	healthy	LUARIS	Satellite cells_SC_2A
1.44334e-14	-0.568608	0.022	0	5.28277e-10	healthy	TEDC2	Satellite cells_SC_2A
1.44334e-14	-0.568608	0.022	0	5.28277e-10	healthy	FP325335.1	Satellite cells_SC_2A
1.44334e-14	-0.547502	0.022	0	5.28277e-10	healthy	AC009413.2	Satellite cells_SC_2A
1.44334e-14	-0.547502	0.022	0	5.28277e-10	healthy	AC062039.1	Satellite cells_SC_2A
1.44334e-14	-0.547502	0.022	0	5.28277e-10	healthy	FGF10-AS1	Satellite cells_SC_2A
1.44334e-14	-0.547502	0.022	0	5.28277e-10	healthy	AC009630.2	Satellite cells_SC_2A
1.44334e-14	-0.526132	0.022	0	5.28277e-10	healthy	C1QL1	Satellite cells_SC_2A
1.44334e-14	-0.408064	0.022	0	5.28277e-10	healthy	LRAT	Satellite cells_SC_2A
1.44334e-14	-0.40753	0.022	0	5.28277e-10	healthy	LINC01807	Satellite cells_SC_2A
1.44334e-14	-0.40753	0.022	0	5.28277e-10	healthy	AL033539.2	Satellite cells_SC_2A
1.44334e-14	-0.40753	0.022	0	5.28277e-10	healthy	AC010197.1	Satellite cells_SC_2A
1.44334e-14	-0.40753	0.022	0	5.28277e-10	healthy	AL117327.1	Satellite cells_SC_2A
3.62817e-14	-1.40994	0.043	0.001	1.32795e-09	healthy	PLAG1	Satellite cells_SC_2A
3.62817e-14	-1.09438	0.043	0.001	1.32795e-09	healthy	ATP2A3	Satellite cells_SC_2A
1.82107e-11	-1.41063	0.043	0.001	6.66529e-07	healthy	GRWD1	Satellite cells_SC_2A
3.39269e-11	-2.24187	0.217	0.035	1.24176e-06	healthy	TPD52L1	Satellite cells_SC_2A
1.16833e-09	-1.99741	0.043	0.001	4.27622e-05	healthy	ATP2B2	Satellite cells_SC_2A
1.16833e-09	-1.34558	0.043	0.001	4.27622e-05	healthy	LINC00957	Satellite cells_SC_2A
1.18529e-09	-1.33013	0.043	0.001	4.33827e-05	healthy	P2RX1	Satellite cells_SC_2A
2.90184e-09	-1.29658	0.087	0.007	0.00010621	healthy	MLXIPL	Satellite cells_SC_2A
5.68585e-09	-1.37822	0.065	0.004	0.000208108	healthy	CSRP2	Satellite cells_SC_2A
1.05877e-08	-2.82158	0.348	0.108	0.000387522	healthy	FN1	Satellite cells_SC_2A
2.17117e-08	-1.50033	0.065	0.004	0.000794669	healthy	SGMS1-AS1	Satellite cells_SC_2A
2.30309e-08	-1.41593	0.065	0.004	0.000842952	healthy	CXXC4	Satellite cells_SC_2A
2.30805e-08	-1.26162	0.043	0.002	0.000844768	healthy	LRTM1	Satellite cells_SC_2A
2.33662e-08	-1.59941	0.043	0.002	0.000855226	healthy	PPP2R2B	Satellite cells_SC_2A
5.53923e-08	-1.06072	0.957	0.937	0.00202741	healthy	MT-CO3	Satellite cells_SC_2A
8.77286e-08	-1.61249	0.022	0	0.00321095	healthy	GPRIN3	Satellite cells_SC_2A
8.77286e-08	-1.52116	0.022	0	0.00321095	healthy	IL18R1	Satellite cells_SC_2A
8.77286e-08	-1.14156	0.022	0	0.00321095	healthy	LHX1	Satellite cells_SC_2A
8.77286e-08	-0.982526	0.022	0	0.00321095	healthy	AC067930.3	Satellite cells_SC_2A
8.77286e-08	-0.978082	0.022	0	0.00321095	healthy	KCNN2	Satellite cells_SC_2A
8.77286e-08	-0.977112	0.022	0	0.00321095	healthy	RAMP2-AS1	Satellite cells_SC_2A
8.77286e-08	-0.956126	0.022	0	0.00321095	healthy	AL163541.1	Satellite cells_SC_2A
8.77286e-08	-0.954512	0.022	0	0.00321095	healthy	AL136141.1	Satellite cells_SC_2A
8.77286e-08	-0.954012	0.022	0	0.00321095	healthy	MYB	Satellite cells_SC_2A
8.77286e-08	-0.953077	0.022	0	0.00321095	healthy	ST8SIA6-AS1	Satellite cells_SC_2A
8.77286e-08	-0.912394	0.022	0	0.00321095	healthy	KCNQ5-AS1	Satellite cells_SC_2A
8.77286e-08	-0.911542	0.022	0	0.00321095	healthy	AC012668.3	Satellite cells_SC_2A
8.77286e-08	-0.910701	0.022	0	0.00321095	healthy	AC127002.2	Satellite cells_SC_2A
8.77286e-08	-0.904593	0.022	0	0.00321095	healthy	AC021087.1	Satellite cells_SC_2A
8.77286e-08	-0.901883	0.022	0	0.00321095	healthy	AC124242.1	Satellite cells_SC_2A
8.77286e-08	-0.897782	0.022	0	0.00321095	healthy	AC040169.1	Satellite cells_SC_2A
8.77286e-08	-0.873807	0.022	0	0.00321095	healthy	AL162385.2	Satellite cells_SC_2A
8.77286e-08	-0.865577	0.022	0	0.00321095	healthy	IGLV10-54	Satellite cells_SC_2A
8.77286e-08	-0.847235	0.022	0	0.00321095	healthy	AC092171.4	Satellite cells_SC_2A
8.77286e-08	-0.846298	0.022	0	0.00321095	healthy	CARD6	Satellite cells_SC_2A
8.77286e-08	-0.844773	0.022	0	0.00321095	healthy	NR5A2	Satellite cells_SC_2A
8.77286e-08	-0.843073	0.022	0	0.00321095	healthy	SORCS3	Satellite cells_SC_2A
8.77286e-08	-0.836906	0.022	0	0.00321095	healthy	NOVA2	Satellite cells_SC_2A
8.77286e-08	-0.79796	0.022	0	0.00321095	healthy	AKR1B10	Satellite cells_SC_2A
8.77286e-08	-0.788058	0.022	0	0.00321095	healthy	AL645937.4	Satellite cells_SC_2A
8.77286e-08	-0.759384	0.022	0	0.00321095	healthy	AC137579.1	Satellite cells_SC_2A
8.77286e-08	-0.756617	0.022	0	0.00321095	healthy	CD40LG	Satellite cells_SC_2A
8.77286e-08	-0.755985	0.022	0	0.00321095	healthy	SPINK5	Satellite cells_SC_2A
8.77286e-08	-0.750317	0.022	0	0.00321095	healthy	INSYN2B	Satellite cells_SC_2A
8.77286e-08	-0.748672	0.022	0	0.00321095	healthy	THEM5	Satellite cells_SC_2A
8.77286e-08	-0.748632	0.022	0	0.00321095	healthy	SLFN12L	Satellite cells_SC_2A
8.77286e-08	-0.747873	0.022	0	0.00321095	healthy	MRVI1	Satellite cells_SC_2A
8.77286e-08	-0.745439	0.022	0	0.00321095	healthy	TMC8	Satellite cells_SC_2A
8.77286e-08	-0.741916	0.022	0	0.00321095	healthy	AL391807.1	Satellite cells_SC_2A
8.77286e-08	-0.726081	0.022	0	0.00321095	healthy	LINC01416	Satellite cells_SC_2A
8.77286e-08	-0.723173	0.022	0	0.00321095	healthy	AC103974.1	Satellite cells_SC_2A
8.77286e-08	-0.672383	0.022	0	0.00321095	healthy	AC129807.1	Satellite cells_SC_2A
8.77286e-08	-0.615666	0.022	0	0.00321095	healthy	AC009974.1	Satellite cells_SC_2A
8.77286e-08	-0.571788	0.022	0	0.00321095	healthy	AC018742.1	Satellite cells_SC_2A
8.77286e-08	-0.568308	0.022	0	0.00321095	healthy	TPPP2	Satellite cells_SC_2A
8.77286e-08	-0.566511	0.022	0	0.00321095	healthy	LRRIQ1	Satellite cells_SC_2A
8.77286e-08	-0.565509	0.022	0	0.00321095	healthy	TMEM246-AS1	Satellite cells_SC_2A
8.77286e-08	-0.564883	0.022	0	0.00321095	healthy	AL020996.1	Satellite cells_SC_2A
8.77286e-08	-0.562918	0.022	0	0.00321095	healthy	AC233702.7	Satellite cells_SC_2A
8.77286e-08	-0.562771	0.022	0	0.00321095	healthy	ELANE	Satellite cells_SC_2A
8.77286e-08	-0.560725	0.022	0	0.00321095	healthy	Z82244.2	Satellite cells_SC_2A
8.77286e-08	-0.538461	0.022	0	0.00321095	healthy	AL133481.1	Satellite cells_SC_2A
8.77286e-08	-0.519107	0.022	0	0.00321095	healthy	AL157871.6	Satellite cells_SC_2A
8.77286e-08	-0.515905	0.022	0	0.00321095	healthy	CDC20	Satellite cells_SC_2A
8.77286e-08	-0.401349	0.022	0	0.00321095	healthy	AL035461.2	Satellite cells_SC_2A
8.77286e-08	-0.401015	0.022	0	0.00321095	healthy	LINC00520	Satellite cells_SC_2A
8.96866e-08	-0.938869	0.022	0	0.00328262	healthy	BATF	Satellite cells_SC_2A
8.96866e-08	-0.738409	0.022	0	0.00328262	healthy	SOD3	Satellite cells_SC_2A
8.96866e-08	-0.39913	0.022	0	0.00328262	healthy	AC244102.4	Satellite cells_SC_2A
2.27597e-07	-0.855922	0.043	0.002	0.00833029	healthy	SNAI3-AS1	Satellite cells_SC_2A
2.34474e-07	-1.50228	0.087	0.009	0.00858198	healthy	ACKR3	Satellite cells_SC_2A
4.99091e-07	-1.69154	0.065	0.006	0.0182672	healthy	SORL1	Satellite cells_SC_2A
5.42515e-07	-1.43339	0.065	0.006	0.0198566	healthy	CD40	Satellite cells_SC_2A
2.16803e-07	5.74604	0.807	0	0.00793522	duchenne	LINC01088	Fibroblasts_FB_7
1.11697e-23	-3.37396	0.786	0.064	4.08823e-19	healthy	NAV1	Fibroblasts_FB_7
2.80868e-19	-1.99039	0.143	0	1.028e-14	healthy	CALML6	Fibroblasts_FB_7
3.95487e-13	-1.98928	0.143	0.002	1.44752e-08	healthy	PRRT3	Fibroblasts_FB_7
4.35386e-13	-2.4375	0.143	0.002	1.59356e-08	healthy	AC011029.1	Fibroblasts_FB_7
4.35386e-13	-1.84169	0.143	0.002	1.59356e-08	healthy	PDE8B	Fibroblasts_FB_7
4.35386e-13	-1.58963	0.143	0.002	1.59356e-08	healthy	PRELID3A	Fibroblasts_FB_7
2.57221e-12	-1.92449	0.214	0.007	9.41453e-08	healthy	MALT1	Fibroblasts_FB_7
4.67597e-11	-3.34776	0.643	0.099	1.71145e-06	healthy	AL110292.1	Fibroblasts_FB_7
2.36038e-10	-2.52853	0.071	0	8.63922e-06	healthy	HPSE2	Fibroblasts_FB_7
2.36038e-10	-1.75912	0.071	0	8.63922e-06	healthy	DPP3	Fibroblasts_FB_7
2.36038e-10	-1.53506	0.071	0	8.63922e-06	healthy	TRPM2	Fibroblasts_FB_7
2.36038e-10	-1.48971	0.071	0	8.63922e-06	healthy	KCTD8	Fibroblasts_FB_7
2.36038e-10	-1.48502	0.071	0	8.63922e-06	healthy	GCHFR	Fibroblasts_FB_7
2.36038e-10	-1.48269	0.071	0	8.63922e-06	healthy	AC239799.1	Fibroblasts_FB_7
2.36038e-10	-1.48269	0.071	0	8.63922e-06	healthy	STON1	Fibroblasts_FB_7
2.36038e-10	-1.48269	0.071	0	8.63922e-06	healthy	PRSS3	Fibroblasts_FB_7
2.36038e-10	-1.48269	0.071	0	8.63922e-06	healthy	C12orf49	Fibroblasts_FB_7
2.36038e-10	-1.40579	0.071	0	8.63922e-06	healthy	ZNF593	Fibroblasts_FB_7
2.36038e-10	-1.40579	0.071	0	8.63922e-06	healthy	OSR1	Fibroblasts_FB_7
2.36038e-10	-1.40579	0.071	0	8.63922e-06	healthy	AC096570.2	Fibroblasts_FB_7
2.36038e-10	-1.40579	0.071	0	8.63922e-06	healthy	SH3RF3-AS1	Fibroblasts_FB_7
2.36038e-10	-1.40579	0.071	0	8.63922e-06	healthy	REELD1	Fibroblasts_FB_7
2.36038e-10	-1.40579	0.071	0	8.63922e-06	healthy	LMNTD1	Fibroblasts_FB_7
2.36038e-10	-1.40579	0.071	0	8.63922e-06	healthy	AC016597.1	Fibroblasts_FB_7
2.36038e-10	-1.3955	0.071	0	8.63922e-06	healthy	AC004946.1	Fibroblasts_FB_7
2.36038e-10	-1.3955	0.071	0	8.63922e-06	healthy	RET	Fibroblasts_FB_7
2.36038e-10	-1.3955	0.071	0	8.63922e-06	healthy	DIPK1C	Fibroblasts_FB_7
2.36038e-10	-1.26337	0.071	0	8.63922e-06	healthy	AC079160.1	Fibroblasts_FB_7
2.36038e-10	-1.26337	0.071	0	8.63922e-06	healthy	LINC02102	Fibroblasts_FB_7
2.36038e-10	-1.26337	0.071	0	8.63922e-06	healthy	AL078582.1	Fibroblasts_FB_7
2.36038e-10	-1.26337	0.071	0	8.63922e-06	healthy	LINC00574	Fibroblasts_FB_7
2.36038e-10	-1.26337	0.071	0	8.63922e-06	healthy	AC246817.1	Fibroblasts_FB_7
2.36038e-10	-1.26337	0.071	0	8.63922e-06	healthy	TAS2R9	Fibroblasts_FB_7
2.36038e-10	-1.26337	0.071	0	8.63922e-06	healthy	RFPL1S	Fibroblasts_FB_7
2.36038e-10	-1.22814	0.071	0	8.63922e-06	healthy	NRM	Fibroblasts_FB_7
2.36038e-10	-1.22814	0.071	0	8.63922e-06	healthy	LIN7B	Fibroblasts_FB_7
2.36038e-10	-1.22814	0.071	0	8.63922e-06	healthy	ZNF497	Fibroblasts_FB_7
2.36038e-10	-1.22814	0.071	0	8.63922e-06	healthy	ZFP92	Fibroblasts_FB_7
2.36038e-10	-1.18331	0.071	0	8.63922e-06	healthy	IKZF1	Fibroblasts_FB_7
2.36038e-10	-1.18331	0.071	0	8.63922e-06	healthy	AC005208.1	Fibroblasts_FB_7
2.36038e-10	-1.18331	0.071	0	8.63922e-06	healthy	AL035458.2	Fibroblasts_FB_7
2.36038e-10	-1.18331	0.071	0	8.63922e-06	healthy	AP000550.1	Fibroblasts_FB_7
2.36038e-10	-1.17475	0.071	0	8.63922e-06	healthy	AC103923.1	Fibroblasts_FB_7
2.36038e-10	-1.17475	0.071	0	8.63922e-06	healthy	AL121929.3	Fibroblasts_FB_7
2.36038e-10	-1.17475	0.071	0	8.63922e-06	healthy	AC140847.2	Fibroblasts_FB_7
2.36038e-10	-1.17475	0.071	0	8.63922e-06	healthy	GRTP1-AS1	Fibroblasts_FB_7
2.36038e-10	-1.17475	0.071	0	8.63922e-06	healthy	LMNB2	Fibroblasts_FB_7
2.36038e-10	-1.13255	0.071	0	8.63922e-06	healthy	AC135803.1	Fibroblasts_FB_7
2.36038e-10	-1.13255	0.071	0	8.63922e-06	healthy	LINC02267	Fibroblasts_FB_7
2.36038e-10	-1.13255	0.071	0	8.63922e-06	healthy	FOXP4-AS1	Fibroblasts_FB_7
2.36038e-10	-1.13255	0.071	0	8.63922e-06	healthy	AL646090.1	Fibroblasts_FB_7
2.36038e-10	-1.13255	0.071	0	8.63922e-06	healthy	ADGRB3	Fibroblasts_FB_7
2.36038e-10	-1.13255	0.071	0	8.63922e-06	healthy	AL445465.1	Fibroblasts_FB_7
2.36038e-10	-1.13255	0.071	0	8.63922e-06	healthy	TESC-AS1	Fibroblasts_FB_7
2.36038e-10	-1.13255	0.071	0	8.63922e-06	healthy	TVP23A	Fibroblasts_FB_7
2.36038e-10	-1.00741	0.071	0	8.63922e-06	healthy	SLC45A1	Fibroblasts_FB_7
2.36038e-10	-1.00741	0.071	0	8.63922e-06	healthy	AC246680.1	Fibroblasts_FB_7
2.36038e-10	-1.00741	0.071	0	8.63922e-06	healthy	LRRC3B	Fibroblasts_FB_7
2.36038e-10	-1.00741	0.071	0	8.63922e-06	healthy	AC244517.2	Fibroblasts_FB_7
2.36038e-10	-1.00741	0.071	0	8.63922e-06	healthy	COL19A1	Fibroblasts_FB_7
2.36038e-10	-1.00741	0.071	0	8.63922e-06	healthy	PIP5K1B	Fibroblasts_FB_7
2.36038e-10	-1.00741	0.071	0	8.63922e-06	healthy	AC104009.1	Fibroblasts_FB_7
2.36038e-10	-1.00741	0.071	0	8.63922e-06	healthy	GLS2	Fibroblasts_FB_7
2.36038e-10	-1.00741	0.071	0	8.63922e-06	healthy	AC023983.1	Fibroblasts_FB_7
2.36038e-10	-1.00741	0.071	0	8.63922e-06	healthy	CDH4	Fibroblasts_FB_7
2.36038e-10	-0.96995	0.071	0	8.63922e-06	healthy	GYPE	Fibroblasts_FB_7
2.36038e-10	-0.96995	0.071	0	8.63922e-06	healthy	SDS	Fibroblasts_FB_7
2.36038e-10	-0.96995	0.071	0	8.63922e-06	healthy	AL008721.2	Fibroblasts_FB_7
2.36038e-10	-0.943246	0.071	0	8.63922e-06	healthy	FGR	Fibroblasts_FB_7
2.36038e-10	-0.943246	0.071	0	8.63922e-06	healthy	CNTN4-AS2	Fibroblasts_FB_7
2.36038e-10	-0.943246	0.071	0	8.63922e-06	healthy	AC104850.2	Fibroblasts_FB_7
2.36038e-10	-0.943246	0.071	0	8.63922e-06	healthy	ZKSCAN7	Fibroblasts_FB_7
2.36038e-10	-0.943246	0.071	0	8.63922e-06	healthy	KCTD6	Fibroblasts_FB_7
2.36038e-10	-0.943246	0.071	0	8.63922e-06	healthy	CEP19	Fibroblasts_FB_7
2.36038e-10	-0.943246	0.071	0	8.63922e-06	healthy	AC105254.1	Fibroblasts_FB_7
2.36038e-10	-0.943246	0.071	0	8.63922e-06	healthy	AL139042.1	Fibroblasts_FB_7
2.36038e-10	-0.943246	0.071	0	8.63922e-06	healthy	AL078590.2	Fibroblasts_FB_7
2.36038e-10	-0.943246	0.071	0	8.63922e-06	healthy	WIPF3	Fibroblasts_FB_7
2.36038e-10	-0.943246	0.071	0	8.63922e-06	healthy	AL353600.1	Fibroblasts_FB_7
2.36038e-10	-0.943246	0.071	0	8.63922e-06	healthy	LINC00839	Fibroblasts_FB_7
2.36038e-10	-0.943246	0.071	0	8.63922e-06	healthy	AL157394.3	Fibroblasts_FB_7
2.36038e-10	-0.943246	0.071	0	8.63922e-06	healthy	AC010173.1	Fibroblasts_FB_7
2.36038e-10	-0.943246	0.071	0	8.63922e-06	healthy	BIN2	Fibroblasts_FB_7
2.36038e-10	-0.943246	0.071	0	8.63922e-06	healthy	ADAT1	Fibroblasts_FB_7
2.36038e-10	-0.943246	0.071	0	8.63922e-06	healthy	AC100786.1	Fibroblasts_FB_7
2.36038e-10	-0.943246	0.071	0	8.63922e-06	healthy	SECTM1	Fibroblasts_FB_7
2.36038e-10	-0.929154	0.071	0	8.63922e-06	healthy	TENT5B	Fibroblasts_FB_7
2.36038e-10	-0.929154	0.071	0	8.63922e-06	healthy	KCNC4	Fibroblasts_FB_7
2.36038e-10	-0.929154	0.071	0	8.63922e-06	healthy	AC105916.1	Fibroblasts_FB_7
2.36038e-10	-0.929154	0.071	0	8.63922e-06	healthy	AC005609.5	Fibroblasts_FB_7
2.36038e-10	-0.929154	0.071	0	8.63922e-06	healthy	ZBED8	Fibroblasts_FB_7
2.36038e-10	-0.929154	0.071	0	8.63922e-06	healthy	FRK	Fibroblasts_FB_7
2.36038e-10	-0.929154	0.071	0	8.63922e-06	healthy	AC004241.1	Fibroblasts_FB_7
2.36038e-10	-0.929154	0.071	0	8.63922e-06	healthy	MEP1B	Fibroblasts_FB_7
2.36038e-10	-0.929154	0.071	0	8.63922e-06	healthy	FZR1	Fibroblasts_FB_7
2.36038e-10	-0.929154	0.071	0	8.63922e-06	healthy	AP001605.1	Fibroblasts_FB_7
2.36038e-10	-0.929154	0.071	0	8.63922e-06	healthy	AP001604.1	Fibroblasts_FB_7
2.36038e-10	-0.929154	0.071	0	8.63922e-06	healthy	PKDREJ	Fibroblasts_FB_7
2.36038e-10	-0.707234	0.071	0	8.63922e-06	healthy	UPP2	Fibroblasts_FB_7
2.36038e-10	-0.707234	0.071	0	8.63922e-06	healthy	ITPR1-DT	Fibroblasts_FB_7
2.36038e-10	-0.707234	0.071	0	8.63922e-06	healthy	AC008180.2	Fibroblasts_FB_7
2.36038e-10	-0.707234	0.071	0	8.63922e-06	healthy	RPS6KA2-IT1	Fibroblasts_FB_7
2.36038e-10	-0.707234	0.071	0	8.63922e-06	healthy	PRKAR2B	Fibroblasts_FB_7
2.36038e-10	-0.707234	0.071	0	8.63922e-06	healthy	AL161908.1	Fibroblasts_FB_7
2.36038e-10	-0.707234	0.071	0	8.63922e-06	healthy	HOTAIR	Fibroblasts_FB_7
2.36038e-10	-0.707234	0.071	0	8.63922e-06	healthy	ATP23	Fibroblasts_FB_7
2.36038e-10	-0.707234	0.071	0	8.63922e-06	healthy	TMEM251	Fibroblasts_FB_7
2.36038e-10	-0.707234	0.071	0	8.63922e-06	healthy	AL139300.2	Fibroblasts_FB_7
2.36038e-10	-0.707234	0.071	0	8.63922e-06	healthy	SALL4	Fibroblasts_FB_7
5.64574e-10	-2.31017	0.143	0.004	2.0664e-05	healthy	XIST	Fibroblasts_FB_7
5.64574e-10	-1.89691	0.143	0.004	2.0664e-05	healthy	LINC02482	Fibroblasts_FB_7
5.64574e-10	-1.88139	0.143	0.004	2.0664e-05	healthy	CEP152	Fibroblasts_FB_7
5.64574e-10	-1.52812	0.143	0.004	2.0664e-05	healthy	VASH2	Fibroblasts_FB_7
6.06497e-10	-1.5465	0.143	0.004	2.21984e-05	healthy	ZNF385D-AS2	Fibroblasts_FB_7
2.4344e-09	-2.0756	0.286	0.021	8.91015e-05	healthy	HHIP	Fibroblasts_FB_7
7.89944e-09	-2.60569	0.286	0.023	0.000289127	healthy	ADAMTSL3	Fibroblasts_FB_7
3.59094e-08	-2.12014	0.143	0.005	0.00131432	healthy	DNAAF4	Fibroblasts_FB_7
3.59094e-08	-1.86626	0.143	0.005	0.00131432	healthy	ZNF880	Fibroblasts_FB_7
4.02683e-08	-1.80491	0.143	0.005	0.00147386	healthy	AC010737.1	Fibroblasts_FB_7
2.05821e-07	-2.69158	0.857	0.316	0.00753326	healthy	ABCA8	Fibroblasts_FB_7
6.39805e-07	-2.2679	0.143	0.007	0.0234175	healthy	KCNIP1	Fibroblasts_FB_7
6.39805e-07	-1.90635	0.143	0.007	0.0234175	healthy	SMG9	Fibroblasts_FB_7
7.03697e-07	-1.6486	0.143	0.007	0.025756	healthy	GBP4	Fibroblasts_FB_7
7.37906e-07	-1.39077	0.143	0.007	0.0270081	healthy	DPH6-DT	Fibroblasts_FB_7
7.73714e-07	-2.24723	0.143	0.007	0.0283187	healthy	AC079298.3	Fibroblasts_FB_7
9.37365e-07	-1.8631	0.214	0.018	0.0343085	healthy	MTM1	Fibroblasts_FB_7
1.33708e-06	-2.10981	0.286	0.034	0.0489385	healthy	ZNF133	Fibroblasts_FB_7
1.17243e-34	3.45074	0.533	0.05	4.29121e-30	duchenne	H19	Myofibers_Type II Tcap
7.72702e-28	2.417	0.525	0.076	2.82817e-23	duchenne	S100A6	Myofibers_Type II Tcap
1.60723e-21	2.54644	0.262	0.006	5.88263e-17	duchenne	MTRNR2L1	Myofibers_Type II Tcap
4.48076e-20	1.6979	0.639	0.193	1.64e-15	duchenne	IL32	Myofibers_Type II Tcap
2.8494e-18	2.1707	0.352	0.048	1.04291e-13	duchenne	S100A4	Myofibers_Type II Tcap
1.09581e-16	2.13839	0.238	0.014	4.01077e-12	duchenne	NES	Myofibers_Type II Tcap
1.19813e-15	2.8643	0.172	0	4.38529e-11	duchenne	MYH3	Myofibers_Type II Tcap
2.90845e-14	1.89987	0.23	0.02	1.06452e-09	duchenne	MYL5	Myofibers_Type II Tcap
3.69358e-14	1.92373	0.254	0.031	1.35189e-09	duchenne	EEF1A1	Myofibers_Type II Tcap
2.09011e-13	2.23818	0.221	0.022	7.65e-09	duchenne	ACTC1	Myofibers_Type II Tcap
8.5457e-12	1.00543	0.852	0.527	3.12781e-07	duchenne	ACTN2	Myofibers_Type II Tcap
1.5076e-11	0.782038	0.975	0.832	5.51795e-07	duchenne	MT-ND2	Myofibers_Type II Tcap
3.67398e-11	1.46482	0.164	0.011	1.34471e-06	duchenne	SPARC	Myofibers_Type II Tcap
3.78089e-11	2.8473	0.131	0.003	1.38384e-06	duchenne	MYH8	Myofibers_Type II Tcap
2.4526e-10	1.44311	0.287	0.064	8.97676e-06	duchenne	ANKRD1	Myofibers_Type II Tcap
4.25114e-10	1.32143	0.107	0	1.55596e-05	duchenne	TPPP3	Myofibers_Type II Tcap
2.05858e-09	1.26538	0.098	0	7.53461e-05	duchenne	FRZB	Myofibers_Type II Tcap
3.71864e-09	0.505763	0.984	0.997	0.000136106	duchenne	MT-CO1	Myofibers_Type II Tcap
1.20256e-08	1.31954	0.123	0.008	0.00044015	duchenne	ADIRF	Myofibers_Type II Tcap
2.39752e-08	2.14525	0.459	0.202	0.000877515	duchenne	MTRNR2L8	Myofibers_Type II Tcap
7.17095e-08	1.21086	0.213	0.048	0.00262464	duchenne	MYOM3	Myofibers_Type II Tcap
1.17331e-07	0.99594	0.525	0.258	0.00429442	duchenne	MEF2C	Myofibers_Type II Tcap
5.56603e-07	1.05783	0.156	0.028	0.0203722	duchenne	CRAT	Myofibers_Type II Tcap
9.00043e-07	0.845546	0.148	0.025	0.0329425	duchenne	PPDPF	Myofibers_Type II Tcap
1.10329e-06	0.813875	0.066	0	0.0403816	duchenne	ATP1B4	Myofibers_Type II Tcap
1.3618e-06	1.15152	0.18	0.042	0.0498431	duchenne	PFDN5	Myofibers_Type II Tcap
2.55503e-22	-3.02741	0.616	0.115	9.35165e-18	healthy	HBB	Myofibers_Type II Tcap
1.65358e-13	-1.88358	0.538	0.18	6.05226e-09	healthy	ACTN3	Myofibers_Type II Tcap
3.5615e-12	-2.60288	0.398	0.066	1.30354e-07	healthy	HBA2	Myofibers_Type II Tcap
4.88712e-12	-0.475285	1	0.984	1.78874e-07	healthy	TPM2	Myofibers_Type II Tcap
1.54112e-11	-2.51928	0.384	0.074	5.64067e-07	healthy	MT1X	Myofibers_Type II Tcap
3.11577e-11	-0.462844	1	0.984	1.1404e-06	healthy	CKM	Myofibers_Type II Tcap
6.18899e-11	-0.520699	0.994	0.967	2.26523e-06	healthy	MB	Myofibers_Type II Tcap
2.67818e-10	-0.447504	1	0.992	9.80241e-06	healthy	MYLPF	Myofibers_Type II Tcap
7.07661e-10	-0.552853	0.983	0.869	2.59011e-05	healthy	GAPDH	Myofibers_Type II Tcap
2.64312e-09	-0.582649	0.952	0.934	9.67409e-05	healthy	ENO3	Myofibers_Type II Tcap
4.92735e-08	-0.770388	0.857	0.77	0.00180346	healthy	MYBPC2	Myofibers_Type II Tcap
4.97545e-07	-0.288714	0.986	0.975	0.0182106	healthy	TCAP	Myofibers_Type II Tcap
1.0705e-27	-1.891	0.043	0	3.91812e-23	healthy	MYL10	Satellite cells_SC_2B
1.0705e-27	-1.37117	0.043	0	3.91812e-23	healthy	CCDC172	Satellite cells_SC_2B
1.0705e-27	-1.28952	0.043	0	3.91812e-23	healthy	RUVBL1-AS1	Satellite cells_SC_2B
1.0705e-27	-1.27829	0.043	0	3.91812e-23	healthy	TTLL13P	Satellite cells_SC_2B
1.0705e-27	-1.24847	0.043	0	3.91812e-23	healthy	TRHDE-AS1	Satellite cells_SC_2B
1.0705e-27	-1.22769	0.043	0	3.91812e-23	healthy	KIAA1614-AS1	Satellite cells_SC_2B
1.0705e-27	-1.22769	0.043	0	3.91812e-23	healthy	AC016586.1	Satellite cells_SC_2B
1.0705e-27	-1.18116	0.043	0	3.91812e-23	healthy	AL354702.2	Satellite cells_SC_2B
1.0705e-27	-1.18116	0.043	0	3.91812e-23	healthy	SLCO1A2	Satellite cells_SC_2B
1.0705e-27	-1.17183	0.043	0	3.91812e-23	healthy	LINC02653	Satellite cells_SC_2B
1.0705e-27	-1.17183	0.043	0	3.91812e-23	healthy	UPK3A	Satellite cells_SC_2B
1.0705e-27	-1.07859	0.043	0	3.91812e-23	healthy	AL133372.3	Satellite cells_SC_2B
1.0705e-27	-1.04842	0.043	0	3.91812e-23	healthy	AC093898.1	Satellite cells_SC_2B
1.0705e-27	-1.04477	0.043	0	3.91812e-23	healthy	AC022001.3	Satellite cells_SC_2B
1.0705e-27	-1.03755	0.043	0	3.91812e-23	healthy	RAD21-AS1	Satellite cells_SC_2B
1.0705e-27	-0.969138	0.043	0	3.91812e-23	healthy	ZBED9	Satellite cells_SC_2B
1.0705e-27	-0.969138	0.043	0	3.91812e-23	healthy	SLC44A4	Satellite cells_SC_2B
1.0705e-27	-0.892097	0.043	0	3.91812e-23	healthy	AC002467.1	Satellite cells_SC_2B
1.0705e-27	-0.830082	0.043	0	3.91812e-23	healthy	ABCC12	Satellite cells_SC_2B
1.0705e-27	-0.72153	0.043	0	3.91812e-23	healthy	AC012462.3	Satellite cells_SC_2B
1.0705e-27	-0.561901	0.043	0	3.91812e-23	healthy	CLEC12A	Satellite cells_SC_2B
1.0705e-27	-0.561901	0.043	0	3.91812e-23	healthy	HM13-IT1	Satellite cells_SC_2B
2.45692e-27	-1.38833	0.087	0.001	8.99258e-23	healthy	TOMM40L	Satellite cells_SC_2B
5.00257e-22	-2.01356	0.087	0.001	1.83099e-17	healthy	AL391117.1	Satellite cells_SC_2B
5.78095e-16	-1.9359	0.087	0.002	2.11589e-11	healthy	IDO1	Satellite cells_SC_2B
1.98478e-14	-1.54419	0.043	0	7.26448e-10	healthy	SHISA2	Satellite cells_SC_2B
1.98478e-14	-1.36527	0.043	0	7.26448e-10	healthy	LAPTM4A-DT	Satellite cells_SC_2B
1.98478e-14	-1.35722	0.043	0	7.26448e-10	healthy	ALX4	Satellite cells_SC_2B
1.98478e-14	-1.28324	0.043	0	7.26448e-10	healthy	SNCG	Satellite cells_SC_2B
1.98478e-14	-1.26775	0.043	0	7.26448e-10	healthy	AC022034.1	Satellite cells_SC_2B
1.98478e-14	-1.24467	0.043	0	7.26448e-10	healthy	TEDC2	Satellite cells_SC_2B
1.98478e-14	-1.22681	0.043	0	7.26448e-10	healthy	LGI1	Satellite cells_SC_2B
1.98478e-14	-1.22512	0.043	0	7.26448e-10	healthy	CDT1	Satellite cells_SC_2B
1.98478e-14	-1.22423	0.043	0	7.26448e-10	healthy	CD83	Satellite cells_SC_2B
1.98478e-14	-1.17714	0.043	0	7.26448e-10	healthy	AL589642.2	Satellite cells_SC_2B
1.98478e-14	-1.17554	0.043	0	7.26448e-10	healthy	SSPO	Satellite cells_SC_2B
1.98478e-14	-1.17285	0.043	0	7.26448e-10	healthy	ENTPD2	Satellite cells_SC_2B
1.98478e-14	-1.07555	0.043	0	7.26448e-10	healthy	SLA	Satellite cells_SC_2B
1.98478e-14	-1.04037	0.043	0	7.26448e-10	healthy	HARBI1	Satellite cells_SC_2B
1.98478e-14	-1.03949	0.043	0	7.26448e-10	healthy	RB1-DT	Satellite cells_SC_2B
1.98478e-14	-1.03855	0.043	0	7.26448e-10	healthy	CRHR1	Satellite cells_SC_2B
1.98478e-14	-0.991027	0.043	0	7.26448e-10	healthy	LINC00992	Satellite cells_SC_2B
1.98478e-14	-0.942331	0.043	0	7.26448e-10	healthy	TDRKH-AS1	Satellite cells_SC_2B
1.98478e-14	-0.826433	0.043	0	7.26448e-10	healthy	SMIM41	Satellite cells_SC_2B
1.98478e-14	-0.826433	0.043	0	7.26448e-10	healthy	AC078864.1	Satellite cells_SC_2B
1.98478e-14	-0.717752	0.043	0	7.26448e-10	healthy	FAXC	Satellite cells_SC_2B
1.98478e-14	-0.71768	0.043	0	7.26448e-10	healthy	AC092803.1	Satellite cells_SC_2B
2.02875e-14	-1.03194	0.043	0	7.42542e-10	healthy	PAX1	Satellite cells_SC_2B
2.0737e-14	-0.876771	0.043	0	7.58993e-10	healthy	AC005840.4	Satellite cells_SC_2B
2.0737e-14	-0.704523	0.043	0	7.58993e-10	healthy	AC015660.2	Satellite cells_SC_2B
2.0737e-14	-0.643647	0.043	0	7.58993e-10	healthy	BEX1	Satellite cells_SC_2B
2.0737e-14	-0.642724	0.043	0	7.58993e-10	healthy	PCOLCE2	Satellite cells_SC_2B
2.0737e-14	-0.642724	0.043	0	7.58993e-10	healthy	AC009509.1	Satellite cells_SC_2B
2.0737e-14	-0.641317	0.043	0	7.58993e-10	healthy	OSTN	Satellite cells_SC_2B
2.0737e-14	-0.553345	0.043	0	7.58993e-10	healthy	NOVA2	Satellite cells_SC_2B
2.0737e-14	-0.551965	0.043	0	7.58993e-10	healthy	AC004257.1	Satellite cells_SC_2B
2.0737e-14	-0.537599	0.043	0	7.58993e-10	healthy	LIF	Satellite cells_SC_2B
5.23502e-14	-1.30292	0.087	0.002	1.91607e-09	healthy	SHISA9	Satellite cells_SC_2B
5.08973e-13	-1.87485	0.13	0.006	1.86289e-08	healthy	CSRP1	Satellite cells_SC_2B
2.25027e-12	-1.97124	0.13	0.006	8.2362e-08	healthy	MYBPHL	Satellite cells_SC_2B
2.17986e-11	-1.53643	0.087	0.003	7.97852e-07	healthy	SFTPD-AS1	Satellite cells_SC_2B
2.03035e-10	-1.69695	0.087	0.003	7.4313e-06	healthy	CYYR1	Satellite cells_SC_2B
2.04632e-10	-1.64405	0.087	0.003	7.48975e-06	healthy	AC015982.2	Satellite cells_SC_2B
4.62768e-10	-2.32755	0.174	0.014	1.69378e-05	healthy	AC005225.2	Satellite cells_SC_2B
5.71807e-10	-1.67522	0.043	0.001	2.09287e-05	healthy	PIK3AP1	Satellite cells_SC_2B
5.71807e-10	-1.35351	0.043	0.001	2.09287e-05	healthy	LINC02249	Satellite cells_SC_2B
5.71807e-10	-1.27259	0.043	0.001	2.09287e-05	healthy	DGCR9	Satellite cells_SC_2B
5.71807e-10	-1.25888	0.043	0.001	2.09287e-05	healthy	XK	Satellite cells_SC_2B
5.71807e-10	-1.23104	0.043	0.001	2.09287e-05	healthy	C5AR2	Satellite cells_SC_2B
5.71807e-10	-1.22418	0.043	0.001	2.09287e-05	healthy	AC099845.1	Satellite cells_SC_2B
5.71807e-10	-1.22373	0.043	0.001	2.09287e-05	healthy	ATRNL1	Satellite cells_SC_2B
5.71807e-10	-1.21899	0.043	0.001	2.09287e-05	healthy	AC007541.1	Satellite cells_SC_2B
5.71807e-10	-1.21845	0.043	0.001	2.09287e-05	healthy	TDRD1	Satellite cells_SC_2B
5.71807e-10	-1.21207	0.043	0.001	2.09287e-05	healthy	AC097468.4	Satellite cells_SC_2B
5.71807e-10	-1.21053	0.043	0.001	2.09287e-05	healthy	BLM	Satellite cells_SC_2B
5.71807e-10	-1.16836	0.043	0.001	2.09287e-05	healthy	ITGB2	Satellite cells_SC_2B
5.71807e-10	-1.16279	0.043	0.001	2.09287e-05	healthy	AC012636.1	Satellite cells_SC_2B
5.71807e-10	-1.15712	0.043	0.001	2.09287e-05	healthy	SLC23A3	Satellite cells_SC_2B
5.71807e-10	-1.06757	0.043	0.001	2.09287e-05	healthy	AC105206.3	Satellite cells_SC_2B
5.71807e-10	-1.02884	0.043	0.001	2.09287e-05	healthy	AC020911.1	Satellite cells_SC_2B
5.71807e-10	-1.025	0.043	0.001	2.09287e-05	healthy	AC007325.1	Satellite cells_SC_2B
5.71807e-10	-1.02408	0.043	0.001	2.09287e-05	healthy	KIF26B-AS1	Satellite cells_SC_2B
5.71807e-10	-0.984179	0.043	0.001	2.09287e-05	healthy	AC022325.2	Satellite cells_SC_2B
5.71807e-10	-0.9577	0.043	0.001	2.09287e-05	healthy	AC027348.1	Satellite cells_SC_2B
5.71807e-10	-0.949993	0.043	0.001	2.09287e-05	healthy	UNC80	Satellite cells_SC_2B
5.88767e-10	-1.26483	0.043	0.001	2.15494e-05	healthy	PCAT7	Satellite cells_SC_2B
5.88767e-10	-1.12431	0.043	0.001	2.15494e-05	healthy	RIC3	Satellite cells_SC_2B
5.88767e-10	-1.02898	0.043	0.001	2.15494e-05	healthy	AL117344.2	Satellite cells_SC_2B
5.88767e-10	-1.02632	0.043	0.001	2.15494e-05	healthy	AC069503.1	Satellite cells_SC_2B
5.88767e-10	-1.02264	0.043	0.001	2.15494e-05	healthy	AP005262.2	Satellite cells_SC_2B
5.88767e-10	-0.636581	0.043	0.001	2.15494e-05	healthy	FP325332.1	Satellite cells_SC_2B
5.88767e-10	-0.630235	0.043	0.001	2.15494e-05	healthy	AC130343.1	Satellite cells_SC_2B
5.88767e-10	-0.541369	0.043	0.001	2.15494e-05	healthy	ENOX1-AS1	Satellite cells_SC_2B
6.06216e-10	-0.999318	0.043	0.001	2.21881e-05	healthy	USB1	Satellite cells_SC_2B
6.06216e-10	-0.544605	0.043	0.001	2.21881e-05	healthy	INAFM2	Satellite cells_SC_2B
6.06216e-10	-0.542274	0.043	0.001	2.21881e-05	healthy	TSC22D1-AS1	Satellite cells_SC_2B
6.14367e-09	-1.7774	0.13	0.009	0.000224865	healthy	ABLIM3	Satellite cells_SC_2B
6.47712e-09	-1.63633	0.087	0.004	0.000237069	healthy	AC060765.2	Satellite cells_SC_2B
1.24534e-08	-1.81802	0.13	0.009	0.000455808	healthy	AKIP1	Satellite cells_SC_2B
2.46549e-08	-1.97281	0.087	0.004	0.000902393	healthy	DYNLT3	Satellite cells_SC_2B
1.01092e-07	-2.21271	0.043	0.001	0.00370006	healthy	MYBL1	Satellite cells_SC_2B
1.01092e-07	-1.55909	0.043	0.001	0.00370006	healthy	KIF11	Satellite cells_SC_2B
1.01092e-07	-1.51049	0.043	0.001	0.00370006	healthy	AC007091.1	Satellite cells_SC_2B
1.01092e-07	-1.2761	0.043	0.001	0.00370006	healthy	TESC-AS1	Satellite cells_SC_2B
1.01092e-07	-1.2512	0.043	0.001	0.00370006	healthy	AL139317.3	Satellite cells_SC_2B
1.01092e-07	-1.15566	0.043	0.001	0.00370006	healthy	LINC02054	Satellite cells_SC_2B
1.01092e-07	-1.15545	0.043	0.001	0.00370006	healthy	CDKN2C	Satellite cells_SC_2B
1.01092e-07	-1.14768	0.043	0.001	0.00370006	healthy	AC009951.6	Satellite cells_SC_2B
1.01092e-07	-1.14628	0.043	0.001	0.00370006	healthy	STX17-AS1	Satellite cells_SC_2B
1.01092e-07	-0.972497	0.043	0.001	0.00370006	healthy	COL4A5	Satellite cells_SC_2B
1.01092e-07	-0.949798	0.043	0.001	0.00370006	healthy	ERICH6-AS1	Satellite cells_SC_2B
1.01092e-07	-0.949319	0.043	0.001	0.00370006	healthy	BNIPL	Satellite cells_SC_2B
1.03333e-07	-1.2023	0.043	0.001	0.00378208	healthy	EFNA1	Satellite cells_SC_2B
1.03333e-07	-1.20146	0.043	0.001	0.00378208	healthy	GLRA2	Satellite cells_SC_2B
1.03333e-07	-1.05082	0.043	0.001	0.00378208	healthy	SLC25A22	Satellite cells_SC_2B
1.03333e-07	-1.02207	0.043	0.001	0.00378208	healthy	AC061708.1	Satellite cells_SC_2B
1.03333e-07	-0.910253	0.043	0.001	0.00378208	healthy	RNF208	Satellite cells_SC_2B
1.03333e-07	-0.700547	0.043	0.001	0.00378208	healthy	AL160408.1	Satellite cells_SC_2B
1.05622e-07	-0.95734	0.043	0.001	0.00386586	healthy	ZNF681	Satellite cells_SC_2B
1.05622e-07	-0.760547	0.043	0.001	0.00386586	healthy	CHRNA10	Satellite cells_SC_2B
1.05622e-07	-0.69596	0.043	0.001	0.00386586	healthy	AL008729.2	Satellite cells_SC_2B
1.05622e-07	-0.681658	0.043	0.001	0.00386586	healthy	FAM135B	Satellite cells_SC_2B
1.05622e-07	-0.540383	0.043	0.001	0.00386586	healthy	AC020917.3	Satellite cells_SC_2B
1.05622e-07	-0.538255	0.043	0.001	0.00386586	healthy	AC012076.1	Satellite cells_SC_2B
1.0796e-07	-0.688477	0.043	0.001	0.00395144	healthy	AC004231.1	Satellite cells_SC_2B
1.0796e-07	-0.626411	0.043	0.001	0.00395144	healthy	REPS2	Satellite cells_SC_2B
1.0796e-07	-0.606378	0.043	0.001	0.00395144	healthy	SLC35A2	Satellite cells_SC_2B
1.0796e-07	-0.540115	0.043	0.001	0.00395144	healthy	PTK6	Satellite cells_SC_2B
1.0796e-07	-0.533611	0.043	0.001	0.00395144	healthy	AC092608.1	Satellite cells_SC_2B
2.39759e-07	-1.4907	0.087	0.005	0.00877543	healthy	USF1	Satellite cells_SC_2B
5.98025e-07	-1.73222	0.087	0.005	0.0218883	healthy	AC016987.1	Satellite cells_SC_2B
1.28716e-06	-1.59233	0.087	0.006	0.0471112	healthy	ABCG2	Satellite cells_SC_2B
1.3126e-06	-2.41477	0.174	0.023	0.0480426	healthy	PLEKHH2	Satellite cells_SC_2B
1.34923e-41	-1.93773	0.182	0	4.93832e-37	healthy	XIST	Satellite cells_SC_4
3.71557e-37	-2.64708	0.273	0.002	1.35994e-32	healthy	OLFML3	Satellite cells_SC_4
1.37214e-21	-1.97547	0.091	0	5.02218e-17	healthy	NOSTRIN	Satellite cells_SC_4
1.37214e-21	-1.97547	0.091	0	5.02218e-17	healthy	AC096708.3	Satellite cells_SC_4
1.37214e-21	-1.82929	0.091	0	5.02218e-17	healthy	GABRA5	Satellite cells_SC_4
1.37214e-21	-1.82929	0.091	0	5.02218e-17	healthy	ADGRE3	Satellite cells_SC_4
1.37214e-21	-1.7308	0.091	0	5.02218e-17	healthy	IFFO2	Satellite cells_SC_4
1.37214e-21	-1.7308	0.091	0	5.02218e-17	healthy	AC012413.1	Satellite cells_SC_4
1.37214e-21	-1.69561	0.091	0	5.02218e-17	healthy	AC245123.1	Satellite cells_SC_4
1.37214e-21	-1.52133	0.091	0	5.02218e-17	healthy	FGR	Satellite cells_SC_4
1.37214e-21	-1.52133	0.091	0	5.02218e-17	healthy	C11orf1	Satellite cells_SC_4
1.37214e-21	-1.52133	0.091	0	5.02218e-17	healthy	IRF2BP1	Satellite cells_SC_4
1.37214e-21	-1.45675	0.091	0	5.02218e-17	healthy	GOLGA6L10	Satellite cells_SC_4
1.37214e-21	-1.1278	0.091	0	5.02218e-17	healthy	LINC02612	Satellite cells_SC_4
1.37214e-21	-1.1278	0.091	0	5.02218e-17	healthy	AL136084.2	Satellite cells_SC_4
1.37214e-21	-1.1278	0.091	0	5.02218e-17	healthy	AC124319.2	Satellite cells_SC_4
1.37214e-21	-1.1278	0.091	0	5.02218e-17	healthy	SHOX	Satellite cells_SC_4
1.37214e-21	-1.08377	0.091	0	5.02218e-17	healthy	AC073321.1	Satellite cells_SC_4
1.37214e-21	-1.08377	0.091	0	5.02218e-17	healthy	AC073934.1	Satellite cells_SC_4
1.37214e-21	-1.08377	0.091	0	5.02218e-17	healthy	IDO2	Satellite cells_SC_4
1.37214e-21	-1.08377	0.091	0	5.02218e-17	healthy	AL121749.2	Satellite cells_SC_4
1.37214e-21	-1.08377	0.091	0	5.02218e-17	healthy	AL157931.1	Satellite cells_SC_4
1.37214e-21	-1.08377	0.091	0	5.02218e-17	healthy	AL139384.1	Satellite cells_SC_4
1.37214e-21	-1.08377	0.091	0	5.02218e-17	healthy	LINC00637	Satellite cells_SC_4
1.37214e-21	-1.08377	0.091	0	5.02218e-17	healthy	DDX28	Satellite cells_SC_4
1.37214e-21	-1.08377	0.091	0	5.02218e-17	healthy	XACT	Satellite cells_SC_4
1.37214e-21	-1.06083	0.091	0	5.02218e-17	healthy	AC108448.3	Satellite cells_SC_4
1.37214e-21	-1.06083	0.091	0	5.02218e-17	healthy	AC116348.1	Satellite cells_SC_4
1.37214e-21	-1.06083	0.091	0	5.02218e-17	healthy	TTLL9	Satellite cells_SC_4
1.37214e-21	-1.06083	0.091	0	5.02218e-17	healthy	TSIX	Satellite cells_SC_4
3.59234e-17	-1.6724	0.182	0.003	1.31483e-12	healthy	AC051619.4	Satellite cells_SC_4
2.31321e-11	-1.96885	0.091	0.001	8.46658e-07	healthy	FMN2	Satellite cells_SC_4
2.31321e-11	-1.96196	0.091	0.001	8.46658e-07	healthy	TK1	Satellite cells_SC_4
2.31321e-11	-1.94885	0.091	0.001	8.46658e-07	healthy	AC090229.1	Satellite cells_SC_4
2.31321e-11	-1.85441	0.091	0.001	8.46658e-07	healthy	AC079801.1	Satellite cells_SC_4
2.31321e-11	-1.84364	0.091	0.001	8.46658e-07	healthy	FAM138B	Satellite cells_SC_4
2.31321e-11	-1.81542	0.091	0.001	8.46658e-07	healthy	AC083799.1	Satellite cells_SC_4
2.31321e-11	-1.70963	0.091	0.001	8.46658e-07	healthy	AC004982.1	Satellite cells_SC_4
2.31321e-11	-1.70267	0.091	0.001	8.46658e-07	healthy	SULT1A3	Satellite cells_SC_4
2.31321e-11	-1.51234	0.091	0.001	8.46658e-07	healthy	AL163952.1	Satellite cells_SC_4
2.31321e-11	-1.50035	0.091	0.001	8.46658e-07	healthy	LY86-AS1	Satellite cells_SC_4
2.31321e-11	-1.43964	0.091	0.001	8.46658e-07	healthy	AC099811.4	Satellite cells_SC_4
2.31321e-11	-1.4383	0.091	0.001	8.46658e-07	healthy	AC005332.4	Satellite cells_SC_4
2.31321e-11	-1.24105	0.091	0.001	8.46658e-07	healthy	AC126178.1	Satellite cells_SC_4
2.31321e-11	-1.23796	0.091	0.001	8.46658e-07	healthy	AC092353.2	Satellite cells_SC_4
2.31321e-11	-1.12161	0.091	0.001	8.46658e-07	healthy	CD7	Satellite cells_SC_4
2.31321e-11	-1.11336	0.091	0.001	8.46658e-07	healthy	LINC02237	Satellite cells_SC_4
2.31321e-11	-1.07405	0.091	0.001	8.46658e-07	healthy	F2RL3	Satellite cells_SC_4
2.31321e-11	-1.07373	0.091	0.001	8.46658e-07	healthy	AC004052.1	Satellite cells_SC_4
2.31321e-11	-1.07043	0.091	0.001	8.46658e-07	healthy	ADM5	Satellite cells_SC_4
2.31321e-11	-1.07009	0.091	0.001	8.46658e-07	healthy	SOCS2-AS1	Satellite cells_SC_4
2.31321e-11	-1.07009	0.091	0.001	8.46658e-07	healthy	AC079177.1	Satellite cells_SC_4
2.31321e-11	-1.06937	0.091	0.001	8.46658e-07	healthy	HS6ST3	Satellite cells_SC_4
2.53573e-11	-1.48486	0.091	0.001	9.28103e-07	healthy	AC096921.2	Satellite cells_SC_4
2.53573e-11	-1.09995	0.091	0.001	9.28103e-07	healthy	AF241728.1	Satellite cells_SC_4
2.53573e-11	-1.06276	0.091	0.001	9.28103e-07	healthy	PAOX	Satellite cells_SC_4
2.53573e-11	-1.05462	0.091	0.001	9.28103e-07	healthy	AC079414.3	Satellite cells_SC_4
2.53573e-11	-1.03548	0.091	0.001	9.28103e-07	healthy	AQP4	Satellite cells_SC_4
2.53573e-11	-1.03237	0.091	0.001	9.28103e-07	healthy	MAGEC3	Satellite cells_SC_4
1.27421e-10	-2.02245	0.273	0.015	4.66374e-06	healthy	IFITM2	Satellite cells_SC_4
5.99715e-10	-2.25979	0.182	0.007	2.19502e-05	healthy	AC013640.1	Satellite cells_SC_4
6.76883e-10	-1.84178	0.182	0.007	2.47746e-05	healthy	DENND6B	Satellite cells_SC_4
7.04696e-10	-1.69759	0.182	0.007	2.57926e-05	healthy	MVB12A	Satellite cells_SC_4
5.52964e-09	-2.16233	0.182	0.008	0.000202391	healthy	ARHGEF4	Satellite cells_SC_4
[truncated: 17,209 more rows]

## Sheet: c. sc2ABCvSC1
Seurat FindMarkers output Identifying genes Differentially expressed between SC_2 vs SC_1
Gene	p_val	avg_log2FC	pct.1	pct.2	p_val_adj
VCAN	2.28146297803318e-11	9.33867	0.048	0	8.35038264589923e-07
AC099560.1	6.72835483425737e-08	8.96176	0.032	0	0.00246265
PCDH19	6.72981668373204e-09	8.87646	0.037	0	0.000246318
NPNT	4.11577378327947e-07	8.27956	0.028	0	0.0150641
GPC3	5.28838316525048e-48	5.85162	0.204	0.003	1.93560112231333e-43
PLPPR1	4.60099209229967e-16	5.76167	0.072	0.001	1.6840091157026e-11
ANKRD1	7.07808146351793e-10	5.49545	0.043	0.001	2.5906485964622e-05
AC105402.3	4.11486141860727e-09	5.40999	0.042	0.002	0.000150608
STK32B	3.14895978016394e-14	5.11136	0.066	0.002	1.1525507691378e-09
FOSB	6.02884363329636e-07	4.75005	0.03	0.001	0.0220662
AK5	1.77114942401682e-12	4.70747	0.058	0.002	6.48258400684395e-08
ADGRL3	1.47228255962715e-13	4.70124	0.063	0.002	5.38870139649133e-09
JUNB	9.34918976545849e-10	4.60741	0.045	0.002	3.42189694605546e-05
PTPRQ	7.64733789257112e-11	4.59034	0.048	0.001	2.79900214205995e-06
SULF1	2.29551637996343e-35	4.53317	0.165	0.008	8.40181950230414e-31
RYR2	3.30375769154859e-29	4.48729	0.138	0.007	1.2092083526837e-24
THBS1	7.08703478944116e-10	4.41526	0.046	0.002	2.59392560328336e-05
KCNIP4	8.20398922628382e-43	4.20164	0.204	0.015	3.00274209671214e-38
AC110296.1	2.08303721588772e-09	4.13609	0.041	0.001	7.62412451387064e-05
AL590550.1	2.12091024196601e-11	4.12181	0.051	0.001	7.76274357661979e-07
LPAR4	2.0260475437693e-09	3.97173	0.044	0.002	7.41553661495e-05
MOXD1	1.51311197508196e-10	3.94364	0.047	0.001	5.53814113999748e-06
PARM1	1.27296703419778e-17	3.83671	0.083	0.003	4.65918664186731e-13
FOS	5.12403673591825e-12	3.81648	0.062	0.006	1.87544868571344e-07
NRP1	3.47310357577093e-24	3.81101	0.116	0.006	1.27119063976792e-19
SEMA5A	1.47301313263101e-14	3.77288	0.072	0.004	5.39137536674275e-10
SYTL2	6.8781840526741e-74	3.6707	0.326	0.026	2.51748414511925e-69
NHS	1.41649360071843e-13	3.65482	0.067	0.004	5.18450822798953e-09
BAIAP2L1	1.27419628366272e-08	3.61158	0.04	0.002	0.000466369
PLD1	7.63501712963057e-17	3.52499	0.086	0.007	2.79449261961608e-12
SLC8A1	7.82018288912769e-07	3.42892	0.033	0.003	0.0286227
COL19A1	4.21075541674155e-09	3.3566	0.046	0.004	0.000154118
PLAU	4.69456805565284e-12	3.33506	0.062	0.006	1.7182588540495e-07
DAPK1	9.0504334914598e-10	3.33067	0.047	0.003	3.3125491622092e-05
RGS17	5.21540760279927e-07	3.31131	0.034	0.003	0.0190889
LOXL2	4.98311329185477e-10	3.26492	0.049	0.003	1.82386929595176e-05
MAML2	2.47618916034737e-17	3.23922	0.092	0.009	9.06309994578742e-13
AP000331.1	2.14828446335354e-16	3.22335	0.084	0.007	7.86293596432031e-12
ANK3	2.19295777173415e-41	3.20476	0.206	0.018	8.02644474032417e-37
HS3ST5	2.55099245701862e-178	3.17152	0.65	0.11	9.33688749193384e-174
EGR1	2.95141249292065e-09	3.09774	0.051	0.007	0.000108025
PRUNE2	2.61175854593806e-07	3.06796	0.038	0.004	0.0095593
DNAH14	2.34404046440045e-07	3.01501	0.038	0.004	0.00857942
FREM1	1.33449596760669e-08	2.98497	0.044	0.004	0.000488439
COL1A1	1.11359917032693e-27	2.96377	0.156	0.02	4.07588432331358e-23
RUNX1	3.9814373548541e-82	2.94452	0.396	0.056	1.45724588625015e-77
TSHZ2	2.76688073484235e-17	2.88308	0.088	0.007	1.01270601775965e-12
ARHGAP42	3.10920283212014e-16	2.87173	0.089	0.01	1.13799932858429e-11
PLCG2	3.58057850516215e-34	2.86695	0.191	0.026	1.3105275386744e-29
COL6A6	5.80465803968036e-16	2.79619	0.088	0.01	2.12456288910341e-11
HDAC2-AS2	8.49784077656721e-123	2.79278	0.548	0.11	3.11029470263136e-118
AEBP1	7.48316144162387e-08	2.75421	0.04	0.004	0.00273891
MME	1.99776056210025e-17	2.74764	0.095	0.01	7.31200343334313e-13
LAMB1	1.41574792055339e-11	2.70132	0.064	0.008	5.18177896401748e-07
NEURL1B	1.0954655703243e-07	2.65657	0.044	0.007	0.00400951
GLIS3	7.94519352332995e-28	2.63307	0.165	0.025	2.908020281474e-23
PRICKLE1	6.24921628621719e-12	2.60062	0.072	0.011	2.28727565291835e-07
AL136171.2	3.14506007939836e-08	2.52349	0.046	0.007	0.00115112
LRRC17	2.09507491335191e-10	2.52122	0.055	0.006	7.66818369035933e-06
MTRNR2L8	1.60549975106773e-15	2.51529	0.103	0.02	5.876289638883e-11
SAMD5	1.38831778575767e-12	2.48047	0.077	0.012	5.08138192765166e-08
AC079793.1	1.34018102613382e-42	2.46743	0.236	0.033	4.90519657375241e-38
SLC24A2	1.35109917481179e-34	2.42668	0.226	0.048	4.94515808972865e-30
FAM153CP	1.20195662039912e-07	2.39776	0.043	0.007	0.00439928
LIPC	7.49957392146536e-09	2.39474	0.049	0.007	0.000274492
ATP10A	2.5682128245355e-11	2.38783	0.067	0.01	9.39991575908238e-07
ARHGAP15	3.24146157810351e-39	2.37238	0.251	0.052	1.18640735220166e-34
POU4F1	7.79982362918625e-15	2.35371	0.091	0.015	2.85481344651846e-10
TRIM9	1.05503889044638e-23	2.33522	0.142	0.021	3.86154784292278e-19
AL513164.1	1.05215894470825e-12	2.31239	0.076	0.011	3.85100695352665e-08
CCN1	4.73346590491494e-09	2.29535	0.056	0.01	0.00017325
AL034417.2	9.08744679775477e-09	2.28875	0.045	0.004	0.00033261
ADAMTS14	2.21247998440195e-08	2.27625	0.041	0.003	0.00080979
COL5A3	2.85574458635125e-09	2.26932	0.055	0.009	0.000104523
DKK3	4.58728441952638e-08	2.25521	0.045	0.007	0.00167899
AL033504.1	8.44897111101152e-11	2.24849	0.063	0.009	3.09240791634133e-06
PHLDB2	2.13276583780915e-28	2.24222	0.177	0.03	7.80613624296526e-24
EYA1	9.63273047690346e-14	2.24006	0.081	0.011	3.52567568185144e-09
KCNMA1	8.00585069995722e-19	2.21287	0.115	0.018	2.93022141469134e-14
BX284613.2	9.12365844340648e-09	2.19575	0.047	0.006	0.000333935
ZC2HC1B	6.88565626879218e-11	2.16072	0.069	0.012	2.52021905094063e-06
DKK2	1.25820898673662e-15	2.14072	0.106	0.021	4.60517071235469e-11
KCNT1	7.53082098808043e-10	2.13686	0.06	0.01	2.75635578984732e-05
MYOF	1.20804602202822e-19	2.0859	0.125	0.021	4.4215692452255e-15
TSPAN12	3.75793895387929e-09	2.08498	0.053	0.008	0.000137544
SORBS1	1.33744563562022e-14	2.08095	0.098	0.019	4.89518477093357e-10
AC079465.1	1.54817279558797e-07	2.07498	0.047	0.009	0.00566647
TENM3	1.3220515268027e-08	2.06709	0.052	0.009	0.000483884
LRMDA	7.12335596535274e-16	2.05917	0.104	0.019	2.60721951687876e-11
DAB2	4.04958408486431e-08	2.04984	0.053	0.011	0.00148219
LINC02821	6.69405116337884e-11	2.03796	0.067	0.011	2.45008966630829e-06
AL109930.1	1.89927872807037e-07	2.03454	0.039	0.004	0.00695155
COL1A2	4.9250818741065e-72	2.02858	0.434	0.109	1.80262921674172e-67
RHD	4.81617704137951e-08	2.01828	0.049	0.009	0.00176277
FBLN7	6.36303131334158e-23	2.00129	0.151	0.028	2.32893309099615e-18
LPAR1	2.99821901317388e-20	1.9963	0.133	0.025	1.09737814101177e-15
PHACTR1	6.21237092589524e-14	1.98332	0.093	0.018	2.27378988258692e-09
DDX3Y	9.11598664954863e-08	1.98171	0.048	0.009	0.00333654
SPTLC3	1.04360571167673e-09	1.96881	0.061	0.011	3.819701265308e-05
TNXB	5.33428185609365e-11	1.95842	0.073	0.015	1.95240050214884e-06
SLC47A2	7.01963437807206e-07	1.95803	0.044	0.009	0.0256926
DOCK10	1.35279158847712e-10	1.92096	0.062	0.009	4.95135249298512e-06
LAMA5	8.0096198059475e-10	1.91522	0.058	0.009	2.93160094517484e-05
SFMBT2	1.60087825572451e-09	1.90312	0.058	0.01	5.85937450377727e-05
LMO7	1.37856933248507e-13	1.86253	0.093	0.019	5.0457016138286e-09
MYLIP	9.82186499589501e-07	1.84942	0.045	0.01	0.035949
PBX3	8.00568568666742e-09	1.84344	0.061	0.013	0.000293016
PDE3A	8.46839775030613e-14	1.84253	0.105	0.026	3.09951826058955e-09
AL365295.1	1.35051302025026e-08	1.83816	0.054	0.01	0.000494301
AC025171.1	3.75956371907854e-10	1.83521	0.06	0.009	1.37603791681994e-05
AFAP1L2	1.63623555431615e-15	1.8299	0.106	0.021	5.98878575235254e-11
PALM2-AKAP2	4.03600429163345e-37	1.82402	0.278	0.075	1.47721793078076e-32
CFH	6.22950360359299e-29	1.82228	0.225	0.061	2.28006061395107e-24
AP000787.1	7.43750844706041e-17	1.82068	0.121	0.027	2.72220246670858e-12
AC025171.2	5.44540230693208e-09	1.78603	0.056	0.01	0.000199307
MVP	5.12075740254389e-07	1.78146	0.044	0.009	0.0187425
UGCG	5.75465503251186e-25	1.7789	0.172	0.036	2.10626128844967e-20
PRRX1	1.26579018047675e-14	1.76321	0.111	0.027	4.63291863956296e-10
CEMIP	5.46745003482802e-07	1.73998	0.046	0.01	0.0200114
AC015923.1	3.18667327787519e-34	1.73399	0.268	0.075	1.1663542864351e-29
RAI14	7.26106881891222e-08	1.72367	0.05	0.01	0.00265762
AP002518.2	2.48542040139183e-19	1.72024	0.17	0.052	9.09688721113423e-15
C12orf76	1.22964975271763e-09	1.71906	0.067	0.015	4.50064105992179e-05
BMPR1B	7.20997456924116e-09	1.71726	0.065	0.016	0.000263892
TSPAN5	3.51219799577324e-18	1.70113	0.143	0.037	1.28549958843296e-13
MCL1	1.01205138379183e-06	1.69268	0.052	0.015	0.0370421
DCLK1	2.11559839858583e-18	1.68615	0.145	0.038	7.74330169866399e-14
CCND3	1.78163433513273e-10	1.67763	0.071	0.015	6.52095983001932e-06
CAV1	7.33006834756882e-14	1.67749	0.101	0.024	2.68287831589366e-09
JAG1	1.63618883791443e-17	1.67224	0.13	0.03	5.9886147656506e-13
SYNJ2	3.80470621791579e-07	1.66546	0.047	0.01	0.0139256
ABCA1	8.13572352329726e-18	1.64212	0.137	0.034	2.97775616676203e-13
AC020611.2	3.79195785504853e-08	1.62911	0.064	0.018	0.00138789
ALDH1A2	5.53292574518987e-09	1.62758	0.072	0.02	0.000202511
FOXN2	1.3144359715883e-06	1.62605	0.055	0.017	0.0481097
ARID5B	2.55039330903981e-23	1.62339	0.188	0.051	9.3346945504166e-19
RUNX1T1	1.12787730567788e-26	1.60383	0.225	0.066	4.1281437265116e-22
CCND2	8.89595062947119e-13	1.58878	0.093	0.021	3.25600688989275e-08
MIR4435-2HG	5.85964814189964e-35	1.58746	0.282	0.083	2.14468981641669e-30
CYTOR	8.30084011230598e-14	1.58714	0.107	0.027	3.03819048950511e-09
ETS1	9.36924269613761e-07	1.58202	0.045	0.01	0.0342924
MIR924HG	3.37763651278503e-10	1.58176	0.078	0.02	1.23624874004445e-05
CARMIL1	2.92208097297578e-07	1.57892	0.049	0.011	0.0106951
ADAM19	5.31212652904043e-16	1.55039	0.127	0.033	1.94429143089409e-11
GALNT17	1.10332735814225e-17	1.54732	0.131	0.03	4.03828846353646e-13
SLC24A3	1.71775706784981e-11	1.52472	0.091	0.024	6.28716264403708e-07
UTY	1.03211863397727e-29	1.52422	0.217	0.049	3.77765741222021e-25
RPA3	3.71468623991232e-07	1.52363	0.058	0.017	0.0135961
GEN1	2.60410862712851e-07	1.5059	0.053	0.013	0.0095313
USP9Y	1.16385562232632e-48	1.50498	0.334	0.076	4.25982796327658e-44
KCNT2	9.57722407347783e-17	1.50464	0.146	0.043	3.50535978313362e-12
ADAM12	1.26758868013908e-19	1.49719	0.144	0.033	4.63950132817704e-15
AMOTL1	2.05558408243284e-10	1.49371	0.076	0.018	7.52364330011242e-06
SKP2	9.35127549282489e-08	1.48988	0.059	0.016	0.00342266
MARCH3	4.80289839071094e-20	1.48653	0.175	0.052	1.75790883998411e-15
TGFBR2	7.28256873582472e-18	1.48351	0.142	0.037	2.6654929829992e-13
DISC1	3.31003520960161e-26	1.48124	0.212	0.057	1.21150598706629e-21
NNMT	3.97178472610238e-13	1.47396	0.111	0.031	1.45371292760073e-08
SRGAP1	1.31896631801861e-23	1.46866	0.206	0.062	4.82754862057991e-19
ZNF385D	4.09706421780173e-26	1.46219	0.234	0.074	1.49956647435761e-21
FAM110B	3.83801942819495e-46	1.44891	0.41	0.147	1.40475349091363e-41
AKAP6	2.30216764561318e-22	1.44178	0.204	0.065	8.4261637997088e-18
ERFE	3.78185290519557e-07	1.43848	0.058	0.017	0.013842
SESN3	2.02666486824149e-20	1.43259	0.172	0.048	7.41779608425066e-16
AC137810.1	4.130588076181e-12	1.43023	0.116	0.038	1.51183654176301e-07
AC027698.1	1.42832575103338e-13	1.42298	0.112	0.03	5.22781508135726e-09
ROR1	3.2913331599086e-17	1.41747	0.145	0.04	1.20466084985815e-12
CDON	6.0776468565687e-07	1.40948	0.05	0.012	0.0222448
AC113346.2	1.38788155387094e-07	1.40569	0.056	0.015	0.00507979
DUBR	4.47249030618007e-10	1.39883	0.083	0.024	1.63697617696497e-05
STXBP6	4.66967416613187e-07	1.39793	0.054	0.015	0.0170915
GXYLT2	4.64592925169382e-31	1.39596	0.285	0.094	1.70045656541245e-26
PSD3	1.14192173415796e-39	1.38305	0.342	0.111	4.17954773919154e-35
ADAMTS16	6.62799129088444e-07	1.37078	0.06	0.019	0.0242591
FMN1	2.02471326382386e-26	1.36601	0.253	0.085	7.41065301692173e-22
ARHGEF3	4.34982219450148e-14	1.36391	0.112	0.029	1.59207842140949e-09
CCDC80	5.53599441619453e-12	1.35657	0.109	0.034	2.02622931627136e-07
CDK6	7.11035619756597e-51	1.35025	0.445	0.163	2.60246147187112e-46
PRSS23	1.38643886690684e-15	1.34437	0.154	0.052	5.07450489676571e-11
AC017002.5	1.0414688445946e-06	1.34268	0.047	0.011	0.0381188
PLAGL1	5.88624796489614e-41	1.33702	0.416	0.171	2.15442561763164e-36
B4GALT5	9.67563628338996e-08	1.33075	0.061	0.017	0.00354138
CAP2	8.95172327498224e-08	1.32824	0.068	0.021	0.00327642
ADAMTS6	1.33049882627781e-10	1.32197	0.103	0.035	4.86975875405941e-06
BNC2	3.59319075137873e-42	1.32004	0.39	0.143	1.31514374691213e-37
CRMP1	4.81543489017678e-11	1.3116	0.085	0.021	1.7624973241536e-06
ADAMTSL3	1.18094111701951e-07	1.3069	0.067	0.021	0.00432236
TRIM22	1.38557128355806e-10	1.30143	0.101	0.034	5.07132945495086e-06
CCDC85A	8.61453023872097e-10	1.30119	0.089	0.028	3.15300421267426e-05
AC026894.1	1.2575863175318e-09	1.29985	0.088	0.028	4.60289168079814e-05
EVC	3.56878224323532e-09	1.28343	0.072	0.019	0.000130621
CASP4	2.19581054316367e-07	1.27997	0.054	0.013	0.00803689
MYL1	2.04649515320369e-09	1.27871	0.094	0.033	7.49037691024081e-05
TANC2	5.7454492054837e-45	1.27419	0.44	0.173	2.10289186369909e-40
PTPRD	2.9138266614083e-10	1.26801	0.087	0.025	1.06648969634205e-05
ABCA9	5.41293493993425e-12	1.26431	0.123	0.044	1.98118831736534e-07
NLGN4Y	5.59518382103676e-14	1.26356	0.125	0.037	2.04789323033766e-09
NTM	2.43611335954031e-16	1.26208	0.141	0.04	8.9164185072535e-12
GLT8D2	3.09291637056011e-11	1.26144	0.102	0.031	1.13203832078871e-06
MCU	1.46179305876413e-09	1.25627	0.089	0.029	5.3503087743826e-05
LINC01111	1.63900989591195e-08	1.25567	0.091	0.035	0.000599894
ADAMTS2	3.68292898281695e-08	1.2547	0.07	0.021	0.00134799
C2orf27A	8.35870243287993e-11	1.25079	0.105	0.035	3.05936867745838e-06
PROS1	8.3966156976202e-09	1.24819	0.079	0.025	0.000307325
NCKAP5	2.23210078765002e-13	1.24421	0.148	0.056	8.16971209287784e-09
EMC10	1.1371642335089e-07	1.24287	0.071	0.024	0.00416213
RASA3	8.16597880412460e-09	1.24281	0.079	0.025	0.000298883
MTERF1	2.62371308136152e-08	1.23595	0.062	0.016	0.000960305
ARHGAP18	5.81401274313404e-12	1.23209	0.111	0.035	2.12798680411449e-07
TRIM5	1.05589159426841e-07	1.23168	0.072	0.025	0.00386467
PAPSS1	4.46526334705862e-17	1.22498	0.173	0.06	1.63433103765692e-12
TMEM108	1.22144806486694e-11	1.22369	0.117	0.04	4.47062206221949e-07
TRIM38	1.05942051874294e-06	1.22274	0.052	0.015	0.0387759
DENND2A	1.164761162045e-15	1.22183	0.143	0.044	4.2631423292009e-11
RUNX2	1.44139312146729e-08	1.22151	0.074	0.022	0.000527564
DMD	2.45361557594223e-57	1.21824	0.585	0.277	8.98047836950617e-53
ABHD17B	5.19890408667898e-11	1.21619	0.099	0.03	1.90285088476537e-06
SCN7A	2.47637411489637e-07	1.20628	0.074	0.027	0.00906378
CELF2-AS2	7.74879184009102e-10	1.20555	0.091	0.029	2.83613530139172e-05
BACH1	6.97095107746702e-10	1.19593	0.096	0.033	2.5514378038637e-05
COLEC12	7.60144823707768e-11	1.19493	0.109	0.038	2.7822060692528e-06
SPEF2	5.30074579170378e-12	1.19359	0.14	0.055	1.9401259672215e-07
CLIP1	1.51803366899806e-15	1.18964	0.159	0.055	5.55615503189981e-11
ARMCX5-GPRASP2	1.192638588724e-07	1.18557	0.069	0.022	0.00436518
SUN1	2.64223560098596e-11	1.18021	0.107	0.035	9.67084652316873e-07
KIRREL1	1.98267914508386e-11	1.17599	0.106	0.034	7.25680393892143e-07
CA3	1.09669419865089e-07	1.16895	0.07	0.022	0.00401401
AC124852.1	3.89793079123909e-19	1.16702	0.186	0.061	1.42668164890142e-14
AC110023.1	3.53972039130409e-08	1.164	0.074	0.024	0.00129557
PDGFC	8.80935811373038e-19	1.1583	0.191	0.066	3.22431316320646e-14
FBXL13	1.00048909083389e-10	1.15498	0.093	0.027	3.66189012136114e-06
PCDH7	1.23418778325311e-23	1.14161	0.246	0.089	4.51725070548471e-19
DAAM2	1.30119940641428e-07	1.14081	0.074	0.026	0.00476252
ADAM10	6.22973945936837e-18	1.13876	0.195	0.072	2.28014693952342e-13
VAV2	4.27385563427991e-08	1.12989	0.073	0.024	0.00156427
UBA6-AS1	5.15177248405639e-08	1.12908	0.09	0.036	0.0018856
CDK17	6.68418564576055e-10	1.12843	0.1	0.035	2.44647878820482e-05
CLIC4	1.41225097918032e-11	1.12658	0.131	0.051	5.1689798088979e-07
TNS1	1.12924501622555e-06	1.12218	0.062	0.021	0.0413315
TRPA1	4.80964295255277e-09	1.12195	0.09	0.031	0.000176038
TACR3	4.87512419054141e-10	1.11583	0.093	0.03	1.78434420498006e-05
TRIO	3.94019380391455e-37	1.11581	0.414	0.17	1.44215033417076e-32
MAP3K5	9.9695917880731e-20	1.11186	0.177	0.053	3.64897029035264e-15
IFI16	1.54719662654798e-10	1.10658	0.116	0.044	5.66289437282828e-06
GSE1	1.55769479136985e-11	1.10579	0.126	0.047	5.70131870589279e-07
CCDC50	4.03187933619026e-08	1.08547	0.079	0.027	0.00147571
FRMD6	1.56911436047304e-11	1.07707	0.129	0.048	5.74311547076737e-07
DNHD1	3.5126243879865e-08	1.06755	0.076	0.025	0.00128566
RUFY3	3.28064536127926e-16	1.05575	0.189	0.073	1.20074900868182e-11
ZNF608	8.08727043125335e-13	1.05434	0.112	0.033	2.96002185054304e-08
MAST4	7.77955936486647e-09	1.05121	0.091	0.033	0.00028474
COL4A2	1.48354619903568e-18	1.05049	0.22	0.088	5.42992744309048e-14
TLE4	7.21104552828639e-41	1.04315	0.477	0.211	2.6393147738081e-36
FRY	5.62855584057298e-24	1.03949	0.299	0.128	2.06010772320812e-19
LINC01579	7.35373201265395e-08	1.03034	0.077	0.027	0.00269154
ZFY	1.11612884916057e-06	1.03026	0.05	0.013	0.0408514
DLG2	1.93236985219811e-24	1.02264	0.32	0.143	7.07266689603032e-20
KLHL13	6.22453820053779e-18	1.02124	0.231	0.099	2.27824322677884e-13
IFFO1	6.1559241056919e-07	1.01461	0.065	0.022	0.0225313
GAREM1	3.10977660429447e-27	1.01292	0.351	0.156	1.13820933493782e-22
ACVR1	1.19028154150021e-06	1.01194	0.062	0.021	0.0435655
LINC01619	2.39559961317319e-07	1.0114	0.084	0.034	0.00876813
CHRNA1	2.63456064224101e-23	1.00426	0.288	0.119	9.64275540666633e-19
ASAP1	2.4686487009265e-13	1.00419	0.14	0.049	9.0355011102611e-09
CD44	3.64577044948838e-14	1.00212	0.18	0.074	1.33438844221724e-09
ECM2	3.26426674866674e-20	0.999426	0.215	0.078	1.19475427267951e-15
RRAS2	2.30785091802541e-07	0.998532	0.084	0.034	0.00844697
DUSP16	8.67626902560771e-08	0.994142	0.079	0.028	0.0031756
SLC38A1	2.99328241125268e-15	0.98892	0.154	0.051	1.09557129534259e-10
SEPTIN11	2.70462132724535e-07	0.98543	0.067	0.022	0.00989918
MYO1B	1.97096387309951e-09	0.983036	0.109	0.043	7.21392487193152e-05
AC087286.2	2.85246211612498e-09	0.981882	0.101	0.038	0.000104403
CRIM1	1.35692653256949e-06	0.979556	0.06	0.02	0.0496649
ROBO1	1.3913314162614e-23	0.978812	0.275	0.108	5.09241211665835e-19
CEP68	5.2421176172132e-07	0.976376	0.066	0.022	0.0191867
PIP5K1A	5.81095698190142e-07	0.970131	0.076	0.029	0.0212687
SH3PXD2B	1.10968888340076e-07	0.960784	0.075	0.026	0.00406157
MCC	6.444580105337e-15	0.958697	0.173	0.066	2.35878076435439e-10
ARHGAP10	6.74424369609466e-09	0.95868	0.092	0.033	0.000246846
MACF1	2.15858926316134e-27	0.958031	0.328	0.133	7.90065256209683e-23
INSYN2A	3.26837062472661e-08	0.955755	0.088	0.033	0.00119626
FAT1	3.59365478555865e-09	0.954924	0.093	0.033	0.000131531
GALNT2	2.57575192604055e-07	0.954182	0.076	0.028	0.00942751
AP001528.1	2.77475995204389e-09	0.951577	0.081	0.025	0.000101559
ARL17B	2.0339357548148e-09	0.948493	0.099	0.036	7.44440825619765e-05
KDM4C	7.11402041404095e-12	0.944614	0.144	0.058	2.60380261174313e-07
AC010894.3	3.6133147871029e-09	0.944604	0.103	0.039	0.000132251
COL3A1	2.88730894657247e-30	0.944492	0.463	0.24	1.05678394753499e-25
NTN1	1.10936393738338e-06	0.944036	0.059	0.019	0.0406038
TIMP2	1.33520280582831e-07	0.943076	0.082	0.031	0.00488698
RBM5	6.30444480789426e-12	0.936852	0.142	0.056	2.30748984413738e-07
STIM2	1.6744982037402e-11	0.935661	0.111	0.036	6.12883087550952e-07
VCL	7.42711895459131e-08	0.922353	0.076	0.026	0.0027184
MET	7.25349179802493e-16	0.920103	0.189	0.074	2.65485053299511e-11
TSHZ3	4.89203856014226e-17	0.918625	0.226	0.097	1.79053503339767e-12
MEGF10	5.91316827685385e-31	0.918118	0.405	0.181	2.16427872101128e-26
ZNF544	1.34753875974335e-07	0.915291	0.079	0.029	0.00493213
HNRNPH3	5.22307165533477e-07	0.912847	0.074	0.028	0.019117
HDAC4	2.96617116732505e-11	0.912495	0.108	0.035	1.08564830895264e-06
ANTXR1	4.45185299736779e-33	0.912447	0.474	0.235	1.62942271556659e-28
ZC3H8	5.04242383977796e-09	0.912016	0.109	0.045	0.000184558
ARL17A	1.79641060740347e-07	0.911954	0.07	0.024	0.00657504
BCAR3	8.39551665949273e-13	0.901889	0.149	0.057	3.07284305254093e-08
TTN-AS1	7.13924326257035e-07	0.900084	0.077	0.03	0.0261303
CAPN2	1.73056562344827e-09	0.898974	0.119	0.049	6.334043238383e-05
GFPT1	4.25160629847587e-07	0.898321	0.077	0.029	0.0155613
ARHGAP26	2.00862543890067e-12	0.891168	0.167	0.072	7.35176996892034e-08
ANKRD28	2.88962129648485e-12	0.890873	0.161	0.069	1.05763029072642e-07
TGFB2	4.21656554852371e-09	0.890151	0.132	0.061	0.000154331
NREP	1.12648996741774e-10	0.882552	0.153	0.07	4.12306592974568e-06
AUXG01000058.1	2.12588947234254e-10	0.871481	0.132	0.055	7.78096805772092e-06
SLF2	1.06035808600164e-19	0.870632	0.294	0.136	3.8810166305746e-15
SMURF2	4.04391171672443e-12	0.869491	0.147	0.058	1.48011212743831e-07
CELF2	1.25756777725221e-36	0.868527	0.575	0.322	4.60282382152083e-32
AC093879.1	1.39290693764341e-09	0.865635	0.111	0.043	5.09817868246864e-05
COL4A1	1.78251462790636e-14	0.864508	0.189	0.079	6.52418178960007e-10
IQGAP1	9.96734910869123e-12	0.863863	0.155	0.065	3.64814944727208e-07
FNDC3B	1.3716839823086e-31	0.860308	0.48	0.246	5.02050054364769e-27
FAM49A	6.1819015516297e-17	0.856624	0.221	0.092	2.26263778691199e-12
AC020909.2	1.35653856132531e-07	0.854429	0.086	0.034	0.00496507
ENOX1	8.79972317903949e-18	0.854202	0.238	0.102	3.22078668076024e-13
ZNF521	7.54545127907889e-12	0.84886	0.134	0.052	2.76171062265566e-07
VGLL3	5.02202194818274e-10	0.846251	0.131	0.056	1.83811025325437e-05
PRKG1	9.98858222296224e-09	0.842405	0.103	0.042	0.000365592
YEATS2	5.50913454347856e-08	0.840266	0.085	0.031	0.0020164
MSI2	3.10884221932993e-09	0.837692	0.113	0.046	0.000113787
KY	5.29277864191553e-08	0.837474	0.088	0.034	0.00193721
WWTR1	1.06029259964251e-11	0.837391	0.16	0.07	3.88077694395154e-07
OSMR	9.14312103609662e-08	0.836429	0.093	0.038	0.00334647
MT-ND4L	3.12491446625489e-09	0.831685	0.141	0.066	0.000114375
MAPK1	5.5144604361813e-08	0.829394	0.092	0.036	0.00201835
GPATCH2L	8.00478341917489e-08	0.82602	0.097	0.04	0.00292983
AF117829.1	1.8812346797485e-08	0.824646	0.107	0.045	0.000688551
KIAA0825	1.59197059162733e-07	0.822836	0.095	0.04	0.00582677
ANXA6	4.58544723625503e-07	0.821851	0.066	0.022	0.0167832
SPON2	6.06479638865837e-07	0.820537	0.099	0.046	0.0221978
CAMK2D	4.49636687606905e-14	0.818154	0.209	0.096	1.64571524031003e-09
MINDY2	4.22138066083434e-08	0.812949	0.089	0.034	0.00154507
ANKRD13A	1.28858467382448e-10	0.807177	0.148	0.065	4.71634876466498e-06
AC012459.1	5.60190605936969e-21	0.805633	0.315	0.147	2.0503536367899e-16
TENT5A	6.23144660094632e-09	0.802603	0.12	0.053	0.000228077
LINC01376	6.40163074913907e-08	0.792323	0.094	0.038	0.00234306
STARD4-AS1	2.70529310899974e-12	0.787318	0.21	0.106	9.90164330824994e-08
ENAH	1.09490494540097e-07	0.785917	0.111	0.052	0.00400746
PICALM	1.73844845224488e-13	0.78505	0.206	0.096	6.3628951800615e-09
DYRK1A	2.65546585962319e-11	0.777477	0.171	0.079	9.71927059280684e-07
ETV6	1.39633987290888e-07	0.770898	0.106	0.048	0.00511074
PLXNA2	1.66328660396185e-14	0.770852	0.197	0.083	6.08779529916078e-10
FGFR1	2.97968801886628e-11	0.770056	0.179	0.085	1.09059561178525e-06
AL356124.1	6.70490807281317e-12	0.768926	0.158	0.066	2.45406340373035e-07
RASAL2	3.78589840094684e-12	0.768918	0.158	0.066	1.38567667373055e-07
ACSL3	8.71186936508031e-08	0.762025	0.092	0.037	0.00318863
ABHD15-AS1	9.10115556617165e-07	0.761226	0.095	0.044	0.0333111
SH3RF3	4.84596359687894e-07	0.759452	0.087	0.037	0.0177367
CDH13	5.1058637983008e-28	0.757578	0.501	0.271	1.86879720881608e-23
GPM6B	2.61331312852581e-09	0.754512	0.145	0.07	9.56498738171733e-05
PUM1	1.91300725570438e-09	0.745621	0.159	0.079	7.00179785660361e-05
SGCD	1.67570080720161e-20	0.742836	0.34	0.166	6.13323252443861e-16
ZBTB7C	3.53504708795111e-13	0.738958	0.187	0.082	1.29386258466098e-08
TTN	8.67877720803759e-18	0.738601	0.383	0.211	3.17651924591384e-13
MAK	2.66944162163854e-09	0.73628	0.134	0.061	9.77042327935921e-05
LRRFIP1	2.07626657046897e-14	0.734801	0.212	0.096	7.59934327457347e-10
ZNF106	8.24648629367512e-08	0.731587	0.098	0.042	0.0030183
STARD13	7.91711671162283e-12	0.729478	0.169	0.074	2.89774388762107e-07
GNG12-AS1	6.91755191985184e-07	0.729428	0.08	0.033	0.0253189
PIGL	2.48577710412432e-07	0.729332	0.099	0.044	0.00909819
IL6ST	2.67204948796527e-08	0.728683	0.125	0.058	0.000977997
CLMAT3	1.32146763613771e-06	0.727555	0.086	0.038	0.048367
AP001011.1	9.25883032069664e-08	0.727013	0.105	0.046	0.00338882
NUBPL	1.88735054552367e-08	0.721783	0.142	0.071	0.000690789
FGGY	2.59587873538976e-13	0.716545	0.191	0.084	9.50117575940006e-09
RAB11FIP3	9.98069893394697e-08	0.713308	0.088	0.035	0.00365304
PSPC1	7.54017776437624e-08	0.712697	0.096	0.039	0.00275978
AC068282.1	1.00641468228214e-06	0.712632	0.116	0.06	0.0368358
MAP4K4	1.79588692223749e-13	0.711896	0.191	0.083	6.57312572408144e-09
ATF7IP2	9.78162531265916e-07	0.711377	0.084	0.036	0.0358017
MAN2A1	1.48332392208839e-15	0.71053	0.239	0.111	5.42911388723572e-11
ATM	6.00476857644746e-10	0.709667	0.146	0.066	2.19780534666554e-05
CHCHD3	1.13586353864571e-06	0.696716	0.105	0.052	0.0415737
EBF3	3.00158247022164e-13	0.696012	0.201	0.091	1.09860919992582e-08
CDKN1C	1.04102343344649e-07	0.693407	0.112	0.052	0.00381025
LINC01278	7.32514157046869e-11	0.692957	0.187	0.092	2.68107506620725e-06
CTNNA1	1.5212957072092e-11	0.692909	0.146	0.06	5.56809441795639e-07
KDM5D	7.18571245402558e-07	0.691109	0.064	0.021	0.0263004
ITGB5	7.17729358667463e-07	0.689421	0.072	0.027	0.0262696
CCNY	5.5115395756717e-16	0.686816	0.269	0.13	2.0172786000916e-11
EVL	5.12274868736709e-09	0.68585	0.156	0.079	0.000187498
AGAP1	3.59484402668876e-13	0.68159	0.229	0.114	1.31574886220835e-08
OSBPL6	1.54676767490522e-07	0.680755	0.109	0.051	0.00566132
TTTY14	4.21491388381672e-20	0.680621	0.196	0.062	1.54270063061576e-15
MINDY3	2.95354995760741e-07	0.671344	0.118	0.058	0.0108103
GSK3B	1.1105788982614e-09	0.669286	0.161	0.079	4.06482982552654e-05
ATXN1	5.99822293875732e-10	0.668708	0.135	0.058	2.19540957781457e-05
SMC6	1.637708907029e-08	0.666883	0.133	0.063	0.000599418
MORC3	2.97220784302616e-09	0.666708	0.13	0.057	0.000108786
SCML1	2.51245846153682e-08	0.666702	0.128	0.061	0.000919585
LYST	1.58597374117261e-08	0.666496	0.128	0.06	0.000580482
AC023509.6	2.2835884888645e-07	0.663667	0.11	0.052	0.00835816
SPATA6	1.0942132201029e-09	0.663339	0.168	0.084	4.00492980689862e-05
HSPG2	2.93465939315445e-17	0.657801	0.332	0.173	1.07411468448846e-12
SLAIN2	3.5611291703554e-08	0.655915	0.1	0.04	0.00130341
COL6A2	1.59195339801426e-11	0.647232	0.243	0.133	5.82670863207199e-07
VMP1	3.73604430185818e-07	0.646372	0.124	0.063	0.0136743
ARHGAP5	4.3971937450302e-10	0.64602	0.13	0.054	1.6094168826185e-05
GIT2	3.99270876672893e-11	0.645017	0.148	0.063	1.46137133571046e-06
TYW1	1.03144734778389e-09	0.644566	0.144	0.065	3.77520043762381e-05
CASK	2.22957361422848e-11	0.64144	0.17	0.076	8.16046238543768e-07
TBCK	2.74222109223578e-11	0.637537	0.179	0.084	1.00368034196922e-06
ARHGEF2	4.5041432496106e-09	0.628931	0.119	0.051	0.000164856
ERBIN	8.95289671651372e-10	0.628185	0.148	0.069	3.27684972721119e-05
PAG1	2.3153695042356e-07	0.627337	0.114	0.054	0.00847448
ZNF451	7.70140128160541e-07	0.626965	0.088	0.038	0.0281879
MPRIP	1.66355456088582e-07	0.625771	0.134	0.069	0.00608878
PHF3	5.7586839958935e-07	0.624195	0.125	0.065	0.0210774
ZNF704	5.64642111281462e-11	0.620435	0.223	0.119	2.06664659150128e-06
LRIG1	5.95758065769553e-07	0.62035	0.116	0.058	0.0218053
SGCE	4.23396086414843e-15	0.61417	0.285	0.147	1.54967201588697e-10
TAOK3	9.69234117781019e-07	0.61175	0.083	0.035	0.0354749
SASH1	4.55794898019226e-14	0.609803	0.276	0.146	1.66825490624017e-09
CEP112	2.69571072423819e-16	0.60555	0.376	0.215	9.8665708217842e-12
AC008771.1	2.7056440135e-07	0.603545	0.112	0.053	0.00990293
SNX9	3.60683162428409e-07	0.599419	0.126	0.064	0.0132014
CSNK1A1	6.67823406961638e-12	0.597619	0.205	0.1	2.44430045182029e-07
SNRNP70	9.16540057640259e-10	0.596546	0.213	0.118	3.35462826496911e-05
PHACTR2	4.28763032425727e-09	0.596254	0.168	0.087	0.000156932
ABI2	2.112768629902e-08	0.595018	0.152	0.078	0.000773294
CTNNB1	7.44223390874722e-10	0.593886	0.162	0.078	2.72393203294057e-05
AEBP2	5.30658164710099e-12	0.592332	0.217	0.109	1.94226194865543e-07
SH3BGRL	1.25804767442775e-06	0.591901	0.103	0.049	0.0460458
SMARCC1	4.68211645166281e-07	0.581108	0.11	0.053	0.017137
PCCA	1.16471271830493e-08	0.580338	0.177	0.096	0.000426297
YAP1	1.52409332857208e-08	0.578018	0.1	0.039	0.000557833
ANK2	1.83179041446771e-14	0.57712	0.338	0.196	6.70453609599326e-10
GRK3	3.41889787097634e-11	0.572947	0.194	0.096	1.25135080975605e-06
CTNND1	7.82122021059789e-11	0.569704	0.204	0.102	2.86264480928093e-06
DTNA	1.02575977203853e-12	0.569124	0.321	0.19	3.75438334163822e-08
AL360178.1	2.85195290792529e-07	0.568401	0.157	0.088	0.0104384
CDK14	2.86260109509347e-09	0.567246	0.169	0.085	0.000104774
UMAD1	4.05632976015805e-08	0.566239	0.127	0.061	0.00148466
COL6A1	1.95857831822854e-11	0.564656	0.275	0.156	7.16859250254829e-07
AUTS2	4.54213445816864e-16	0.56044	0.387	0.225	1.6624666330343e-11
AKAP13	1.52330632897948e-13	0.556939	0.307	0.171	5.5754534946978e-09
KANSL1	2.80012308741352e-15	0.556759	0.315	0.169	1.02487305122422e-10
LHFPL6	3.0413349638604e-09	0.55372	0.202	0.112	0.000111316
RELCH	1.30874944843149e-06	0.549212	0.093	0.043	0.0479015
SUCLG2	7.98191116696345e-09	0.545757	0.14	0.066	0.000292146
STAT3	6.23087710579953e-07	0.545222	0.113	0.055	0.0228056
ARMC8	5.41408939830199e-07	0.543349	0.127	0.065	0.0198161
LINC00486	1.74601227711546e-16	0.539906	0.433	0.262	6.39057953547031e-12
TCHP	2.15236733270215e-08	0.538687	0.145	0.072	0.000787788
COMMD10	4.62261349118764e-09	0.537116	0.193	0.106	0.000169192
AC025159.1	3.98559867136535e-10	0.536419	0.228	0.127	1.45876896970643e-05
TNPO1	2.29527546872988e-11	0.536165	0.208	0.105	8.40093774309822e-07
CREB1	3.09633086381843e-07	0.535929	0.083	0.033	0.0113329
NEDD4L	1.23925235043572e-07	0.530991	0.15	0.08	0.00453579
SSH2	1.07406983079491e-16	0.528878	0.359	0.193	3.93120298769244e-12
PIEZO1	3.50380080049116e-07	0.528705	0.1	0.045	0.0128243
ST5	7.50685025644609e-12	0.526946	0.302	0.173	2.74758226236183e-07
UACA	3.34451361695471e-08	0.526789	0.108	0.046	0.00122413
ZFR	2.31776945449524e-07	0.525697	0.15	0.081	0.00848327
AC083870.1	8.78699148668996e-08	0.524518	0.13	0.064	0.00321613
GCC2	4.81100023360136e-08	0.522938	0.107	0.046	0.00176087
TANC1	4.10852287155266e-07	0.52093	0.117	0.057	0.0150376
TIA1	1.37187204449805e-07	0.51862	0.099	0.043	0.00502119
VTI1A	2.62060918532934e-08	0.517346	0.173	0.093	0.000959169
PPFIBP1	1.21491816677063e-11	0.516321	0.22	0.111	4.44672198219719e-07
EXT1	3.7747745238465e-14	0.515564	0.335	0.192	1.38160522347306e-09
BBX	3.87529293226325e-09	0.515207	0.154	0.075	0.00014184
RAPH1	2.31046916537768e-08	0.512876	0.174	0.093	0.000845655
DENND1A	7.18334367194166e-08	0.509843	0.14	0.071	0.00262918
SH3D19	2.57699349744195e-11	0.509124	0.3	0.178	9.43205389998726e-07
ZEB2	2.46960844544771e-15	0.507993	0.521	0.349	9.03901387118316e-11
SLC20A2	1.21975976111545e-06	0.504223	0.12	0.062	0.0446444
CECR2	2.10463649046202e-12	0.503634	0.248	0.128	7.70318001874002e-08
ZNF644	3.96739473472278e-09	0.501718	0.149	0.072	0.000145211
RBPJ	3.01185331308221e-07	0.50121	0.131	0.066	0.0110237
SEMA6A	9.45416113457526e-08	0.49914	0.134	0.066	0.00346032
NEMF	8.65371627118575e-08	0.494378	0.149	0.078	0.00316735
NT5C2	1.33725102660237e-07	0.493038	0.147	0.078	0.00489447
FGFR4	6.84210307494774e-10	0.492884	0.215	0.117	2.50427814646162e-05
SIK3	4.91297945375855e-11	0.491225	0.214	0.109	1.79819960987017e-06
FANCC	7.3422113344873e-08	0.490772	0.133	0.065	0.00268732
FOXP1	6.58326971265461e-11	0.486281	0.252	0.141	2.40954254752871e-06
TRAPPC9	6.54332916202532e-07	0.485758	0.132	0.07	0.0239492
ABL1	9.93913682250338e-08	0.484164	0.125	0.061	0.00363782
NEAT1	5.09515301352885e-19	0.478722	0.629	0.426	1.86487695448169e-14
RBFOX2	2.78196855555037e-11	0.47872	0.282	0.162	1.01822831101699e-06
WDR7	5.61465982043271e-08	0.476088	0.126	0.06	0.00205502
UBE2D3	4.87191606139489e-08	0.475695	0.15	0.076	0.00178317
RAD51B	3.29960061076366e-08	0.472452	0.164	0.088	0.00120769
ST8SIA1	1.07493775183657e-09	0.471858	0.237	0.136	3.93437966549701e-05
MBP	9.99939469168206e-07	0.470156	0.186	0.114	0.0365988
CCAR1	4.43735673178473e-07	0.469992	0.113	0.055	0.0162412
SPIDR	4.30313945122524e-13	0.468491	0.307	0.172	1.57499207054295e-08
NCOA1	9.06437820271634e-18	0.464225	0.561	0.372	3.31765306597621e-13
ARHGAP24	8.58054891572601e-16	0.461215	0.524	0.344	3.14056670864488e-11
GNAS	1.97003568941146e-16	0.460441	0.47	0.287	7.21052762681487e-12
MUSK	3.05961859979269e-13	0.460048	0.297	0.161	1.11985100371012e-08
HERC4	8.85730661176165e-10	0.454103	0.205	0.108	3.24186279297088e-05
WDR70	1.13151782566144e-07	0.452321	0.179	0.101	0.00414147
FOXJ3	2.60059728912337e-07	0.451785	0.172	0.098	0.00951845
NR3C1	4.03781241046343e-12	0.449869	0.399	0.251	1.47787972035372e-07
EIF4G3	1.40441117012411e-08	0.44603	0.228	0.135	0.000514029
SAMD4A	4.8077620725703e-08	0.445855	0.253	0.157	0.00175969
AC118549.1	4.2887416190252e-09	0.43949	0.181	0.096	0.000156972
DST	1.04961695404131e-14	0.439463	0.498	0.318	3.84170301348661e-10
PTBP2	5.81333204095635e-09	0.439198	0.173	0.09	0.000212774
KMT2C	3.88322264520744e-09	0.437017	0.254	0.15	0.00014213
DOCK1	7.34344954669151e-10	0.434263	0.233	0.129	2.68777596858456e-05
USP9X	6.03246296130674e-08	0.434181	0.143	0.072	0.00220794
HNRNPR	2.76093094398637e-07	0.432486	0.136	0.071	0.0101053
IPO9-AS1	5.92207796936356e-12	0.428042	0.303	0.174	2.16753975756676e-07
RNF111	1.65018900088358e-09	0.42623	0.18	0.091	6.03985676213399e-05
TIAM2	6.0038965211539e-07	0.419132	0.118	0.058	0.0219749
AC007319.1	2.16163894442573e-08	0.411987	0.249	0.154	0.000791181
MDFIC	3.75770268526508e-09	0.411288	0.28	0.172	0.000137536
ANKRD10	2.68335763006157e-11	0.407883	0.393	0.247	9.82135726178834e-07
ATRX	1.7972664071082e-10	0.405861	0.265	0.151	6.57817477665671e-06
ATG7	1.31497992402284e-08	0.402092	0.182	0.098	0.000481296
CNOT2	1.08820248682383e-08	0.39075	0.198	0.109	0.000398293
BAZ2B	1.17796135639231e-09	0.390168	0.258	0.148	4.3114563605315e-05
RBMS1	2.39201786809968e-09	0.388733	0.24	0.137	8.75502459903164e-05
AL050309.1	4.00502914011335e-07	0.387648	0.161	0.091	0.0146588
MAGI1	3.31169350045668e-07	0.387308	0.137	0.072	0.0121211
DPYD	3.00198071931004e-10	0.386736	0.308	0.188	1.09875496307467e-05
SOX6	2.74475012996769e-08	0.381817	0.224	0.132	0.00100461
COPA	3.6825631661548e-07	0.378581	0.148	0.08	0.0134785
RHOJ	5.66629404614024e-08	0.378225	0.238	0.145	0.00207392
RBM33	7.00589394582425e-07	0.376108	0.125	0.064	0.0256423
ATXN10	3.65193447102744e-08	0.37509	0.16	0.083	0.00133664
SPATS2L	1.34611881696949e-18	0.374263	0.709	0.512	4.92692948199003e-14
DAG1	2.04508632892059e-09	0.370603	0.407	0.281	7.48522047248224e-05
SETBP1	1.09192124041908e-07	0.368475	0.173	0.096	0.00399654
KIF13A	1.62190695523325e-08	0.365937	0.258	0.155	0.000593634
ZFAND3	4.97957899719132e-10	0.363047	0.333	0.205	1.82257570876199e-05
ERC1	8.48145485431098e-08	0.362041	0.192	0.11	0.0031043
CHD2	4.7211253592521e-07	0.358311	0.179	0.103	0.0172798
PRKN	2.06702596654297e-08	0.356705	0.306	0.199	0.000756552
HNRNPC	9.91895696767194e-07	0.356563	0.155	0.088	0.0363044
WSB1	7.85000487657116e-09	0.354884	0.265	0.161	0.000287318
PPP6R3	1.45452290020604e-07	0.353546	0.222	0.134	0.0053237
TCF7L2	3.77122628165257e-07	0.352043	0.147	0.08	0.0138031
RIF1	4.38270227722505e-07	0.350992	0.168	0.096	0.0160411
CENPP	1.79084209716313e-11	0.348102	0.207	0.102	6.55466115982677e-07
FYN	7.85320139228236e-08	0.346668	0.225	0.136	0.00287435
SETD2	1.11139893807585e-07	0.344725	0.168	0.092	0.00406783
GLS	1.85920760110979e-07	0.339517	0.123	0.06	0.00680489
ELF2	1.32515240949391e-07	0.339181	0.216	0.129	0.00485019
PARD3	2.98691185177149e-11	0.334593	0.324	0.192	1.09323960686688e-06
USP12	6.56658460753963e-07	0.333469	0.179	0.105	0.0240344
TNKS	7.64874509038071e-07	0.331199	0.181	0.107	0.0279952
PTPRE	2.14030588040541e-08	0.331169	0.249	0.15	0.000783373
ARL15	5.28350194715714e-07	0.325406	0.155	0.087	0.0193381
PTK2	1.55727373919338e-09	0.324961	0.274	0.163	5.69977761282169e-05
GTDC1	7.26779430701351e-10	0.323736	0.283	0.168	2.66008539431001e-05
MAP2K5	3.69190207282835e-07	0.320608	0.171	0.097	0.0135127
RASA1	5.87677424750262e-10	0.314567	0.293	0.172	2.15095814232843e-05
NAALADL2	9.99458029085494e-11	0.310056	0.518	0.366	3.65811633225582e-06
MAGI2	1.84362220930608e-08	0.309383	0.253	0.154	0.000674784
MYO18B	2.19782740655086e-10	0.305727	0.384	0.241	8.04426809071679e-06
FTO	6.20920714651756e-08	0.305602	0.276	0.175	0.00227263
PKD2	5.79488424313757e-07	0.304197	0.212	0.13	0.0212099
UBE2K	6.12381519893472e-07	0.303811	0.138	0.073	0.0224138
ATP2B4	1.38780024578131e-07	0.303358	0.196	0.114	0.00507949
COA1	4.56019766936595e-07	0.301196	0.149	0.081	0.0166908
AOPEP	2.11717074411302e-08	0.297835	0.481	0.337	0.000774906
PTPRK	9.45895037237846e-08	0.296806	0.205	0.12	0.00346207
TMTC1	2.9592500490501e-08	0.295017	0.274	0.171	0.00108312
MYO1E	6.83879889277257e-07	0.295	0.242	0.154	0.0250307
STK3	1.21742932405244e-07	0.29336	0.218	0.13	0.00445591
KCNN3	4.94197634017906e-07	0.291265	0.248	0.159	0.0180881
COL5A2	5.7634265621402e-10	0.290918	0.288	0.172	2.10947175600894e-05
PXDN	4.03196445369137e-09	0.289653	0.314	0.198	0.000147574
STRN3	6.73589842754464e-07	0.287984	0.128	0.066	0.0246541
PAN3	2.48886962739068e-08	0.283713	0.273	0.169	0.000910951
ADK	7.70330353589463e-07	0.282847	0.194	0.117	0.0281949
MRPS28	2.94444873478822e-07	0.281617	0.123	0.061	0.010777
CLCN5	1.4569901422974e-08	0.281162	0.642	0.497	0.000533273
XRN1	4.20614791599006e-07	0.280648	0.183	0.106	0.0153949
SRPK2	1.25500809735157e-06	0.278403	0.17	0.099	0.0459346
GPC6	3.71091311909216e-15	0.265547	0.708	0.507	1.35823131071892e-10
TASP1	2.18246948698929e-07	0.264951	0.187	0.108	0.00798806
TCF4	6.44866774143426e-09	0.261275	0.443	0.299	0.000236028
AHI1	2.76948203496183e-07	0.261057	0.256	0.162	0.0101366
TTC28	2.52167926940979e-07	0.260505	0.346	0.235	0.0092296
PTPN12	4.22100352848753e-10	0.256638	0.31	0.186	1.54492950146172e-05
MSC-AS1	4.49000807150021e-09	0.256381	0.402	0.269	0.000164339
NFIB	2.55259021747492e-07	0.25501	0.488	0.354	0.00934274
JMJD1C	3.95325627014163e-08	0.251207	0.432	0.297	0.00144693
WWOX	1.56296196128195e-08	0.249916	0.395	0.273	0.00057206
WDFY3	1.94517360248397e-07	0.249373	0.221	0.133	0.00711953
SYNE1	7.66133215944831e-08	0.248964	0.284	0.18	0.00280412
USP47	6.20540732844915e-07	0.248433	0.191	0.114	0.0227124
SMG6	4.99568700267018e-09	0.247134	0.2	0.108	0.000182847
RERE	4.65623159525293e-07	0.246956	0.324	0.219	0.0170423
AL138828.1	3.88472100048488e-08	0.245623	0.329	0.217	0.00142185
RIN2	9.72882419962921e-08	0.244548	0.217	0.127	0.00356085
AFF4	3.09612082891047e-07	0.243976	0.16	0.088	0.0113321
FBXL17	6.30396330278409e-07	0.241279	0.192	0.114	0.0230731
DIAPH2	3.40949072379773e-09	0.237446	0.279	0.168	0.000124791
CALD1	1.00815768248495e-08	0.231701	0.212	0.118	0.000368996
AC005909.2	7.29520077265857e-08	0.226811	0.161	0.087	0.00267012
EPC1	1.29038236462241e-06	0.225078	0.217	0.135	0.0472293
NEB	2.42830667044856e-08	0.224288	0.335	0.216	0.000888785
PPP1R9A	7.70996797970595e-07	0.223464	0.52	0.389	0.0282193
PARD3B	1.0061446924319e-06	0.219557	0.334	0.226	0.0368259
TENM4	2.86905276536505e-07	0.214464	0.388	0.271	0.010501
TMEFF2	3.92833600037257e-07	0.210628	0.325	0.22	0.0143781
SPARC	8.77770116477468e-08	0.209597	0.319	0.207	0.00321273
FTX	6.44996922304156e-10	0.209225	0.716	0.547	2.36075323532544e-05
ZMYM2	5.48816255833841e-08	0.208201	0.225	0.132	0.00200872
UBR3	3.94652455485288e-07	0.205878	0.204	0.121	0.0144447
NOTCH3	7.00995138158656e-07	0.202746	0.282	0.184	0.0256571
LAMA2	9.96714564387965e-10	0.202318	0.817	0.7	3.64807497711639e-05
FAM172A	2.14846928193847e-07	0.170549	0.269	0.169	0.00786361
ZMYM4	4.83235849079786e-07	0.163367	0.184	0.106	0.0176869
PLPP1	1.87702549305138e-07	0.158571	0.272	0.172	0.0068701
QKI	1.18654538824263e-06	0.158132	0.419	0.294	0.0434287
BIRC6	4.73848634792637e-08	0.148193	0.298	0.189	0.00173433
USP34	1.8573239834174e-07	0.134113	0.284	0.179	0.00679799
SNHG14	6.4827930062029e-07	0.126947	0.298	0.195	0.0237277
NAV1	1.14537145477817e-07	0.1205	0.431	0.3	0.00419217
MEG8	1.25521920719912e-09	-0.312801	0.678	0.706	4.59422782026949e-05
MEG3	1.13916025159205e-12	-0.337882	0.768	0.769	4.16944043685205e-08
CADM2	4.05964406090933e-16	-0.348005	0.916	0.933	1.48587032273342e-11
MALAT1	6.92920470103543e-52	-0.421981	0.998	1	2.53615821262598e-47
LPP	1.21972999807319e-06	-0.499304	0.429	0.45	0.0446433
MT-CO3	9.44949984836488e-13	-0.559836	0.614	0.652	3.45861143950003e-08
PTPRG	2.69910402445742e-11	-0.589817	0.509	0.552	9.87899063991661e-07
HMCN2	7.53298686904185e-30	-0.633231	0.645	0.728	2.75714852393801e-25
EGFR	1.38535334692493e-08	-0.704828	0.399	0.432	0.000507053
NFIA	1.12520043697282e-30	-0.705879	0.597	0.691	4.11834611936422e-26
RBMS3	2.29962720035311e-28	-0.71505	0.588	0.669	8.41686551601241e-24
TLN2	3.12332627563764e-12	-0.724549	0.43	0.474	1.14316865014613e-07
FOXO3	6.11077977172287e-07	-0.767236	0.197	0.251	0.0223661
CD63	5.60619033810776e-08	-0.838778	0.203	0.262	0.00205192
MIR99AHG	3.8804589299431e-18	-0.839599	0.409	0.496	1.42028677294847e-13
IGFBP5	3.88893342710912e-18	-0.847641	0.37	0.461	1.42338852365621e-13
RYR3	5.99501275350034e-17	-0.936541	0.3	0.389	2.19423461790866e-12
COL15A1	1.63717074560059e-11	-0.969187	0.165	0.242	5.99220864597271e-07
PBX1	1.45811042718069e-08	-0.985407	0.173	0.234	0.000533683
ABCA8	2.44246731365994e-15	-1.04081	0.252	0.339	8.93967461472675e-11
ZHX3	9.85923648099264e-07	-1.0529	0.126	0.174	0.0360858
FOXO1	1.87024544764255e-17	-1.0802	0.241	0.337	6.84528536291651e-13
RBMS3-AS2	7.77345482144563e-10	-1.12401	0.134	0.197	2.84516219919731e-05
FAM214A	1.15251354968827e-06	-1.13063	0.11	0.156	0.0421831
APOE	8.0052819901429e-46	-1.19632	0.302	0.486	2.9300132612122e-41
KIF16B	2.57426450817529e-07	-1.22255	0.088	0.134	0.00942207
SPARCL1	1.23072081488745e-42	-1.2282	0.325	0.493	4.50456125456956e-38
ABLIM1	5.52992926726372e-11	-1.2629	0.149	0.218	2.0240094111112e-06
PITPNC1	6.33369448626245e-14	-1.33474	0.099	0.174	2.31819551891692e-09
ESR1	7.19016342747195e-18	-1.3435	0.145	0.24	2.63167171608901e-13
PTPN4	8.21671759786763e-09	-1.34616	0.09	0.143	0.00030074
AL592156.2	2.29458646456303e-09	-1.3879	0.099	0.156	8.39841591894715e-05
USP53	3.32108455587841e-14	-1.40086	0.087	0.159	1.21555015829706e-09
MIR3936HG	4.47068529112e-07	-1.40497	0.039	0.073	0.0163632
FOXP2	2.04791139403292e-29	-1.41576	0.155	0.286	7.49556049329987e-25
FRMD4A	4.19054566864296e-31	-1.44852	0.209	0.346	1.53378162018001e-26
SLC47A1	3.25293352493148e-09	-1.44888	0.056	0.103	0.000119061
PNMT	5.51598489065366e-07	-1.46473	0.017	0.04	0.0201891
KCNQ5	3.84407210839125e-19	-1.4906	0.106	0.199	1.40696883239228e-14
ESRRG	7.61959562922107e-21	-1.50947	0.116	0.216	2.7888481962512e-16
CLU	4.18530478068565e-12	-1.53116	0.045	0.097	1.53186340277875e-07
MEF2A	2.09079693353962e-25	-1.5464	0.147	0.262	7.65252585644837e-21
RNF217-AS1	5.29661970803307e-07	-1.56948	0.025	0.053	0.0193862
IGF1R	8.58484551172463e-14	-1.57334	0.05	0.108	3.14213930574633e-09
AL392023.2	1.94736779199927e-11	-1.61673	0.029	0.071	7.12756085549654e-07
ABCC5	6.26545285694752e-09	-1.64565	0.044	0.085	0.000229322
FHOD3	2.86044775631739e-21	-1.64719	0.089	0.18	1.04695248328973e-16
IP6K3	2.13817537771722e-07	-1.6493	0.023	0.052	0.00782594
MT1X	5.761095084928e-12	-1.66614	0.028	0.071	2.1086184120345e-07
NKAIN3	2.1974971653917e-15	-1.66971	0.029	0.08	8.04305937505015e-11
MAPT	4.83594581677318e-08	-1.75801	0.037	0.073	0.00177
IGF1	1.28042292226091e-07	-1.76981	0.037	0.072	0.00468648
RNF150	1.27779327890234e-29	-1.78605	0.136	0.259	4.67685118011046e-25
CHCHD10	1.19560245825161e-08	-1.91191	0.014	0.039	0.000437602
CRISPLD2	1.48186926928542e-26	-1.9126	0.055	0.144	5.42378971251155e-22
STUM	3.98356325894776e-12	-1.92004	0.03	0.074	1.45802398840747e-07
MARCH1	4.43728323893502e-64	-1.92104	0.167	0.372	1.62409003828261e-59
DLK1	2.55694465061643e-34	-1.92503	0.062	0.171	9.3586731157212e-30
NTRK3	1.15259759379188e-12	-1.96645	0.024	0.064	4.21862245303765e-08
ITIH5	1.11917201094594e-24	-1.96945	0.042	0.119	4.09628147726325e-20
TSC22D3	4.53500408655064e-08	-1.98544	0.02	0.048	0.00165986
AGBL1	3.13205455029764e-29	-1.98943	0.073	0.177	1.14636328595444e-24
COL4A3	1.32904419494854e-08	-1.99174	0.024	0.056	0.000486443
COL4A4	6.30543324151137e-12	-1.99254	0.027	0.069	2.30785162072558e-07
NKAIN2	1.82400665614525e-07	-2.00165	0.021	0.048	0.00667605
CITED4	1.14928937360862e-06	-2.0165	0.009	0.026	0.0420651
SLC22A5	5.83781272491538e-10	-2.05117	0.018	0.049	2.13669783544628e-05
EGLN3	1.31894542866404e-06	-2.07351	0.017	0.039	0.0482747
LPIN3	1.33555323748057e-06	-2.11905	0.006	0.021	0.0488826
NLGN4X	2.581466577248e-28	-2.15404	0.049	0.136	9.44842581938542e-24
PDP1	4.67286531907389e-27	-2.21816	0.044	0.126	1.71031543543424e-22
SYTL4	4.37770206701817e-17	-2.22118	0.032	0.087	1.60228273354932e-12
ERBB4	4.38179082180737e-21	-2.25914	0.024	0.08	1.60377925868972e-16
DHRS3	8.59525032575876e-08	-2.26893	0.002	0.013	0.00314595
DAPK2	9.908011013099e-14	-2.27593	0.012	0.044	3.62643111090437e-09
TP63	1.29723913676321e-11	-2.2883	0.014	0.044	4.74802496446703e-07
NALCN	2.77562677480616e-20	-2.32202	0.018	0.066	1.0159071558468e-15
PTGDS	9.99575865882555e-41	-2.32538	0.061	0.178	3.65854762671674e-36
ATP1A2	5.01220322074976e-47	-2.33777	0.064	0.193	1.83451650082662e-42
PPARGC1A	1.92459356966045e-35	-2.34481	0.047	0.144	7.04420492431421e-31
MLXIPL	4.43783696267762e-13	-2.35208	0.011	0.04	1.62429270670964e-08
ABLIM2	2.89064647431033e-11	-2.37304	0.011	0.038	1.05800551606232e-06
LMX1A	1.71249466176395e-07	-2.38361	0.004	0.018	0.0062679
ZBTB16	1.21374600234877e-55	-2.38766	0.061	0.201	4.44243174319671e-51
CDH23	1.5497200414326e-13	-2.38834	0.014	0.048	5.67213032364747e-09
FXYD6	1.71667092528457e-09	-2.4021	0.013	0.038	6.28318725363405e-05
CXXC4	1.32944707809045e-12	-2.41576	0.009	0.036	4.86590925051887e-08
RGN	4.4087690305678e-07	-2.44909	0.012	0.033	0.0161365
AC016745.1	5.42550396346226e-15	-2.45707	0.014	0.049	1.98578870566682e-10
DYNC1I1	4.00992850930861e-43	-2.46585	0.045	0.153	1.46767393369204e-38
SOX13	8.66141326844845e-16	-2.49582	0.011	0.044	3.17016387038482e-11
LTBP1	3.2772680147295e-50	-2.49836	0.043	0.16	1.19951286607114e-45
FN1	2.08585032414338e-71	-2.50389	0.103	0.291	7.63442077139719e-67
CGNL1	3.63984293539575e-11	-2.5265	0.003	0.019	1.3322189127842e-06
TPRG1	1.56853167096734e-74	-2.547	0.073	0.249	5.74098276890756e-70
AC016987.1	3.94874720968811e-08	-2.58322	0.006	0.024	0.00144528
LINC02456	8.49248181444171e-09	-2.59948	0.02	0.049	0.000310833
AL359233.1	7.99360061999558e-08	-2.60477	0.004	0.017	0.00292574
RHOU	3.60896070888457e-15	-2.67173	0.008	0.036	1.32091570905884e-10
SOX5	2.47451496323097e-31	-2.6741	0.017	0.079	9.05697221692166e-27
NCAM2	2.43099217317183e-16	-2.68268	0.014	0.053	8.89767445302622e-12
APCDD1	1.426327910705e-09	-2.68846	0.006	0.025	5.22050278597137e-05
PREX2	5.5805463408685e-17	-2.68983	0.006	0.034	2.04253576622128e-12
UBASH3B	3.70336279875472e-07	-2.73782	0.003	0.016	0.0135547
ELL2	2.22055431696068e-44	-2.74017	0.026	0.116	8.12745085550778e-40
CRLF1	8.38186631091169e-10	-2.75296	0.006	0.025	3.06784688845679e-05
THBS4	1.576259560593e-28	-2.78342	0.014	0.069	5.76926761772645e-24
ACKR3	3.15217038718629e-36	-2.82498	0.011	0.069	1.15372588341406e-31
PRDM1	1.07203756165573e-09	-2.85022	0.002	0.016	3.92376467941613e-05
FGD5	3.36805404948964e-08	-2.854	0.003	0.015	0.00123274
PLEKHH2	1.42945036982057e-24	-2.86858	0.019	0.074	5.23193129858028e-20
RXRG	7.41488538182661e-23	-2.89024	0.014	0.061	2.71392219860236e-18
GLDN	2.0724616343117e-12	-2.89129	0.004	0.024	7.58541682774425e-08
RTN1	2.09536337507617e-08	-2.8922	0.003	0.017	0.000766924
TPD52L1	2.36736485263592e-97	-2.94693	0.045	0.219	8.66479209713273e-93
TOGARAM2	5.34724785840355e-31	-2.99966	0.012	0.064	1.95714618865428e-26
FKBP5	3.14544057225775e-123	-3.00441	0.056	0.272	1.15126270385206e-118
EGF	3.60185096066875e-20	-3.01862	0.008	0.042	1.31831347011437e-15
AL591501.1	8.37248144156964e-09	-3.04908	0.004	0.018	0.000306441
STK32A	1.5647488369886e-21	-3.05828	0.009	0.046	5.72713721826198e-17
PPP2R2B	7.31810446131126e-07	-3.08871	0.003	0.013	0.026785
AC004069.1	3.52421418697229e-08	-3.12045	0.002	0.013	0.0012899
HS3ST3A1	5.14773825682788e-12	-3.12696	0.004	0.022	1.88412367938157e-07
BCAT1	8.01934363989885e-20	-3.18439	0.004	0.03	2.93515996563938e-15
BMP6	2.00138365793608e-25	-3.24353	0.01	0.054	7.32526432641185e-21
GRIA4	1.06356927599167e-43	-3.30946	0.01	0.071	3.89276990705711e-39
SLCO2B1	2.07807297827507e-15	-3.37095	0.004	0.026	7.60595490778458e-11
SORL1	1.31533808858671e-27	-3.39432	0.007	0.048	4.81426893803623e-23
SLC16A9	2.51485133788491e-11	-3.40802	0.002	0.017	9.20460738179257e-07
MAPK4	1.29145968301195e-11	-3.4381	0.001	0.013	4.72687158579204e-07
ENPP6	7.47595362729877e-08	-3.51434	0.002	0.011	0.00273627
AC022034.1	3.3439525800239e-08	-3.52667	0.002	0.012	0.00122392
LPL	2.39823008196551e-91	-3.53046	0.02	0.145	8.77776192300198e-87
IL1RAP	1.54051838064015e-54	-3.57261	0.009	0.078	5.63845132498101e-50
AL133257.1	6.10605958683461e-41	-3.58509	0.012	0.074	2.23487886937734e-36
CXXC4-AS1	6.47287489582106e-120	-3.5966	0.025	0.184	2.36913694061946e-115
RIC3	2.18347606264703e-13	-3.61195	0.002	0.019	7.99174073689441e-09
KEL	1.74694903234042e-36	-3.72106	0.004	0.045	6.39400815326916e-32
AC016573.1	1.26045718585258e-08	-3.72149	0.003	0.016	0.00046134
TRDN	2.50624535453771e-280	-3.7396	0.075	0.456	9.17310862214347e-276
NFIA-AS2	1.55757637212813e-31	-3.9307	0.005	0.044	5.70088527962617e-27
COL11A1	1.29882775948736e-12	-3.9883	0.002	0.016	4.75383948249968e-08
SLC24A4	1.72308228405267e-15	-4.02023	0.001	0.015	6.30665346786116e-11
CSRP2	1.26336525507169e-26	-4.05784	0.003	0.034	4.6240431700879e-22
SHISA9	2.89087932764096e-36	-4.13192	0.003	0.038	1.05809074270987e-31
LINC01748	2.43238183184903e-27	-4.20053	0.002	0.026	8.90276074275064e-23
COL4A5	1.34315490154179e-14	-4.2318	0.001	0.016	4.9160812551331e-10
LINC00482	1.52995191679514e-14	-4.36746	0	0.011	5.59977701066188e-10
AC099792.1	1.6516180944012e-53	-4.3778	0.003	0.051	6.04508738731783e-49
OLFML3	3.18641032099168e-53	-4.51707	0.003	0.048	1.16625804158616e-48
TRDN-AS1	2.94027406574434e-72	-4.52337	0.004	0.071	1.07616971080309e-67
TRPV5	3.70791984912888e-31	-4.77467	0.001	0.025	1.35713574397966e-26
TRHDE-AS1	3.23902900067495e-54	-4.81047	0.001	0.04	1.18551700453704e-49
AC012636.1	7.14124124224732e-36	-4.87025	0.001	0.029	2.61376570707494e-31
GREB1	3.11375262366483e-75	-4.88869	0.003	0.067	1.13966459778757e-70
LINC02176	3.76263008618718e-15	-4.95962	0.001	0.012	1.37716023784537e-10
AL391117.1	1.10331061098507e-89	-5.18176	0.003	0.072	4.03822716726644e-85
SLC25A48	1.92473515966963e-23	-5.19823	0.001	0.019	7.04472315790681e-19
ALX4	4.92764694651073e-27	-5.23378	0.001	0.021	1.80356805889239e-22
AC004053.1	0	-5.29275	0.014	0.301	0
CXCL14	1.02098627124304e-163	-5.94845	0.003	0.116	3.73691185137663e-159
GREM1	2.66337664890923e-183	-6.33553	0.003	0.127	9.74822487267268e-179
TRHDE	0	-6.38703	0.006	0.268	0
TSIX	1.81468501128946e-60	-6.81274	0	0.037	6.64192860982054e-56
LINC01239	2.1258334339861e-239	-7.74489	0.001	0.148	7.78076295173253e-235
AC096577.1	0	-8.3294	0.004	0.521	0
ZNF727	1.81105893330624e-19	-10.6828	0	0.01	6.62865680179417e-15
XIST	0	-13.8277	0	0.309	0

## Sheet: d. sc2ABCvSC1Enrichr
Enrichr GSEA using genes significantly (adj. p < 0.05, FC > 2) upregulated in SC_2 relative to SC_1
	database	Term	Overlap	P.value	Adjusted.P.value	Old.P.value	Old.Adjusted.P.value	Odds.Ratio	Combined.Score	Genes
1	GO_Biological_Process_2023	Regulation Of Cell Migration (GO:0030334)	22/434	8.70688e-08	0.000127489	0	0	4.24613	69.0276	ACVR1;SEMA5A;CARMIL1;CLIC4;CEMIP;JAG1;TNXB;CAV1;ADAM10;LAMB1;SULF1;THBS1;COL1A1;DOCK10;DAB2;DAAM2;PLAU;RUFY3;PDGFC;PHACTR1;AMOTL1;SRGAP1
2	GO_Biological_Process_2023	Extracellular Structure Organization (GO:0043062)	11/109	2.19031e-07	0.000127489	0	0	8.67777	133.065	ADAMTS16;COL1A1;ADAMTS14;ADAMTS2;CCDC80;COL1A2;COL4A2;COL5A3;NPNT;ADAMTS6;COL19A1
3	GO_Biological_Process_2023	External Encapsulating Structure Organization (GO:0045229)	11/110	2.40545e-07	0.000127489	0	0	8.58968	130.91	ADAMTS16;COL1A1;ADAMTS14;ADAMTS2;CCDC80;COL1A2;COL4A2;COL5A3;NPNT;ADAMTS6;COL19A1
4	GO_Biological_Process_2023	Extracellular Matrix Organization (GO:0030198)	13/176	6.7362e-07	0.000267764	0	0	6.19427	88.0243	ADAM10;NPNT;COL19A1;LOXL2;ADAMTS16;COL1A1;ADAMTS14;ADAMTS2;CCDC80;COL1A2;COL4A2;COL5A3;ADAMTS6
5	GO_Biological_Process_2023	Positive Regulation Of Cell Motility (GO:2000147)	14/221	1.58878e-06	0.000505232	0	0	5.26189	70.2596	ACVR1;SEMA5A;CARMIL1;CEMIP;CAV1;ADAM10;LAMB1;THBS1;COL1A1;DAB2;DAAM2;PLAU;RUFY3;PDGFC
6	GO_Biological_Process_2023	Positive Regulation Of Cell Migration (GO:0030335)	15/272	3.76519e-06	0.000997775	0	0	4.54739	56.7956	ACVR1;SEMA5A;CARMIL1;CEMIP;CAV1;ADAM10;LAMB1;THBS1;COL1A1;DAB2;DAAM2;PLAU;RUFY3;PDGFC;PLCG2
7	GO_Biological_Process_2023	Neuron Development (GO:0048666)	11/150	5.26964e-06	0.00119696	0	0	6.10536	74.2018	UGCG;TENM3;TNXB;PBX3;TMEM108;DMD;LAMB1;FRY;POU4F1;RUNX1;B4GALT5
8	GO_Biological_Process_2023	Positive Regulation Of Epithelial To Mesenchymal Transition (GO:0010718)	6/47	3.48118e-05	0.00691884	0	0	11.1276	114.231	COL1A1;DAB2;TNXB;JAG1;LOXL2;TGFBR2
9	GO_Biological_Process_2023	Positive Regulation Of Wnt Signaling Pathway (GO:0030177)	8/109	0.000102411	0.0180926	0	0	6.05124	55.5898	SEMA5A;COL1A1;DAAM2;CAV1;GPC3;DISC1;SULF1;DKK2
10	GO_Biological_Process_2023	Skeletal System Development (GO:0001501)	9/149	0.000170729	0.0271458	0	0	4.92062	42.6885	COL1A1;LAMA5;COL1A2;SPEF2;EVC;SULF1;CD44;COL19A1;PAPSS1
11	GO_Biological_Process_2023	Collagen Fibril Organization (GO:0030199)	5/42	0.000224063	0.0323873	0	0	10.238	86.0363	COL1A1;ADAMTS2;COL1A2;COL5A3;LOXL2
12	GO_Biological_Process_2023	Skin Development (GO:0043588)	6/68	0.00028138	0.0372828	0	0	7.35073	60.0981	COL1A1;UGCG;CLIC4;JAG1;COL1A2;COL5A3
1591	MSigDB_Hallmark_2020	UV Response Dn	14/144	7.74699e-09	3.40867e-07	0	0	8.41158	157.094	NRP1;CAV1;LPAR1;SYNJ2;RUNX1;VAV2;TGFBR2;COL1A1;DAB2;COL1A2;KCNMA1;CCN1;CDON;CAP2
1592	MSigDB_Hallmark_2020	Epithelial Mesenchymal Transition	15/200	7.54925e-08	1.66084e-06	0	0	6.34054	103.98	NNMT;PRRX1;NTM;THBS1;LOXL2;COL1A1;DAB2;VCAN;COL1A2;COL4A2;COL5A3;ADAM12;CCN1;CD44;CAP2
1593	MSigDB_Hallmark_2020	TNF-alpha Signaling via NF-kB	11/200	7.67865e-05	0.0011262	0	0	4.47873	42.4337	ABCA1;EGR1;JAG1;PLAU;FOSB;FOS;CCN1;JUNB;CD44;MCL1;B4GALT5
1594	MSigDB_Hallmark_2020	Angiogenesis	5/36	0.00010594	0.00116534	0	0	12.2233	111.876	NRP1;VCAN;CCND2;JAG1;VAV2
1595	MSigDB_Hallmark_2020	Myogenesis	8/200	0.00532023	0.046818	0	0	3.16845	16.5908	COL1A1;CHRNA1;COL4A2;MYL1;ADAM12;DMD;SORBS1;AEBP1
1635	Reactome_2022	Extracellular Matrix Organization R-HSA-1474244	20/291	2.21175e-09	1.24522e-06	0	0	5.86309	116.848	LAMA5;TNXB;ADAM10;LAMB1;THBS1;COL19A1;LOXL2;ADAMTS16;COL1A1;ADAM19;ADAMTS14;ADAMTS2;VCAN;COL1A2;COL4A2;COL5A3;ADAM12;DMD;COL6A6;CD44
1636	Reactome_2022	Defective B3GALTL Causes PpS R-HSA-5083635	7/37	4.85534e-07	0.000110438	0	0	17.8211	259.083	SEMA5A;ADAMTS16;ADAMTS14;ADAMTS2;ADAMTSL3;THBS1;ADAMTS6
1637	Reactome_2022	O-glycosylation Of TSR Domain-Containing Proteins R-HSA-5173214	7/38	5.88481e-07	0.000110438	0	0	17.2453	247.396	SEMA5A;ADAMTS16;ADAMTS14;ADAMTS2;ADAMTSL3;THBS1;ADAMTS6
1638	Reactome_2022	Collagen Biosynthesis And Modifying Enzymes R-HSA-1650814	8/67	2.83664e-06	0.000342809	0	0	10.3811	132.596	COL1A1;ADAMTS2;ADAMTS14;COL1A2;COL4A2;COL5A3;COL6A6;COL19A1
1639	Reactome_2022	Collagen Formation R-HSA-1474290	9/90	3.04449e-06	0.000342809	0	0	8.53038	108.354	COL1A1;ADAMTS2;ADAMTS14;COL1A2;COL4A2;COL5A3;COL6A6;COL19A1;LOXL2
1640	Reactome_2022	RAC3 GTPase Cycle R-HSA-9013423	9/93	4.00549e-06	0.000375848	0	0	8.22447	102.212	DOCK10;ARHGAP42;TRIO;BAIAP2L1;JAG1;CAV1;NHS;ARHGAP15;VAV2
1641	Reactome_2022	Drug-mediated Inhibition Of CDK4/CDK6 Activity R-HSA-9754119	2024-03-05	2.25518e-05	0.00166501	0	0	112.975	1208.8	CCND3;CCND2;CDK6
1642	Reactome_2022	Collagen Chain Trimerization R-HSA-8948216	6/44	2.3659e-05	0.00166501	0	0	12.0079	127.906	COL1A1;COL1A2;COL4A2;COL5A3;COL6A6;COL19A1
1643	Reactome_2022	Diseases Associated With O-glycosylation Of Proteins R-HSA-3906995	7/69	3.54664e-05	0.00221862	0	0	8.60909	88.2167	SEMA5A;ADAMTS16;ADAMTS2;ADAMTS14;ADAMTSL3;THBS1;ADAMTS6
1644	Reactome_2022	Regulation Of RUNX1 Expression And Activity R-HSA-8934593	2024-04-17	6.2597e-05	0.00352421	0	0	23.2502	225.034	CCND3;CCND2;CDK6;RUNX1
1645	Reactome_2022	O-linked Glycosylation R-HSA-5173105	8/107	8.98844e-05	0.00456157	0	0	6.17411	57.5241	SEMA5A;ADAMTS16;ADAMTS14;ADAMTS2;ADAMTSL3;THBS1;ADAMTS6;B4GALT5
1646	Reactome_2022	Scavenging By Class A Receptors R-HSA-3000480	2024-04-19	9.98377e-05	0.00456157	0	0	20.1481	185.604	COLEC12;COL1A1;COL1A2;COL4A2
1647	Reactome_2022	Assembly Of Collagen Fibrils And Other Multimeric Structures R-HSA-2022090	6/57	0.000105329	0.00456157	0	0	8.94118	81.8871	COL1A1;COL1A2;COL4A2;COL5A3;COL6A6;LOXL2
1648	Reactome_2022	Diseases Of Glycosylation R-HSA-3781865	9/143	0.000124999	0.00502675	0	0	5.14252	46.2169	SEMA5A;ADAMTS16;ADAMTS14;ADAMTS2;VCAN;ADAMTSL3;GPC3;THBS1;ADAMTS6
1649	Reactome_2022	RAC1 GTPase Cycle R-HSA-9013149	10/178	0.000136315	0.00511635	0	0	4.56746	40.6529	DOCK10;ARHGAP42;TRIO;BAIAP2L1;JAG1;CAV1;NHS;ARHGAP15;SRGAP1;VAV2
1650	Reactome_2022	RAC2 GTPase Cycle R-HSA-9013404	7/87	0.000156923	0.00552174	0	0	6.66594	58.392	DOCK10;ARHGAP42;TRIO;BAIAP2L1;CAV1;NHS;VAV2
1651	Reactome_2022	Signal Transduction R-HSA-162582	51/2465	0.000773071	0.023974	0	0	1.70998	12.2523	NRP1;TRIO;MAML2;DOCK10;ARHGAP42;CCND3;BAIAP2L1;CDON;TLE4;MYLIP;TACR3;ADAM10;FOS;DKK2;RUNX1;VAV2;TGFBR2;CLIP1;EVC;COL4A2;RASA3;ALDH1A2;ADAM12;ARHGEF3;COL6A6;LAMA5;RGS17;PLPPR1;LPAR1;ARHGAP18;LPAR4;PRICKLE1;ARHGAP15;THBS1;NEURL1B;PDGFC;PLCG2;NHS;SRGAP1;ABCA1;EGR1;JAG1;CAV1;PCDH7;LAMB1;COL1A2;ABHD17B;PDE3A;FOSB;AMOTL1;BMPR1B
1652	Reactome_2022	RHOA GTPase Cycle R-HSA-8980692	8/147	0.000780859	0.023974	0	0	4.38843	31.3998	ARHGAP42;TRIO;CAV1;PCDH7;ARHGEF3;ARHGAP18;SRGAP1;VAV2
1653	Reactome_2022	Signaling By NOTCH2 R-HSA-1980145	4/32	0.000809069	0.023974	0	0	10.7865	76.7961	NEURL1B;JAG1;MAML2;ADAM10
1654	Reactome_2022	Constitutive Signaling By NOTCH1 HD Domain Mutants R-HSA-2691232	2024-03-15	0.000930027	0.0261803	0	0	18.8197	131.367	NEURL1B;JAG1;ADAM10
1655	Reactome_2022	Glycosaminoglycan Metabolism R-HSA-1630316	7/120	0.00110454	0.0296122	0	0	4.71133	32.0763	CEMIP;VCAN;GPC3;HS3ST5;CD44;B4GALT5;PAPSS1
1656	Reactome_2022	Aberrant Regulation Of Mitotic Cell Cycle Due To RB1 Defects R-HSA-9687139	4/36	0.00127147	0.0325382	0	0	9.4363	62.9173	CCND3;CCND2;CDK6;SKP2
1657	Reactome_2022	Aberrant Regulation Of Mitotic G1/S Transition In Cancer Due To RB1 Defects R-HSA-9659787	2024-03-17	0.00136297	0.033363	0	0	16.1295	106.424	CCND3;CCND2;CDK6
1658	Reactome_2022	Diseases Of Mitotic Cell Cycle R-HSA-9675126	4/38	0.00156065	0.0366104	0	0	8.88032	57.3904	CCND3;CCND2;CDK6;SKP2
1659	Reactome_2022	Binding And Uptake Of Ligands By Scavenger Receptors R-HSA-2173782	4/41	0.00207572	0.0449473	0	0	8.15906	50.4021	COLEC12;COL1A1;COL1A2;COL4A2
1660	Reactome_2022	Non-integrin membrane-ECM Interactions R-HSA-3000171	4/41	0.00207572	0.0449473	0	0	8.15906	50.4021	LAMA5;DMD;LAMB1;THBS1
2198	KEGG_2021_Human	ECM-receptor interaction	11/88	2.33441e-08	4.29531e-06	0	0	11.0562	194.291	COL1A1;LAMA5;TNXB;COL1A2;COL4A2;COL6A6;LAMB1;NPNT;FREM1;THBS1;CD44
2199	KEGG_2021_Human	Focal adhesion	13/201	2.99246e-06	0.000275306	0	0	5.36371	68.2232	LAMA5;TNXB;CAV1;LAMB1;THBS1;VAV2;COL1A1;CCND3;COL1A2;CCND2;COL4A2;PDGFC;COL6A6
2200	KEGG_2021_Human	Protein digestion and absorption	8/103	6.86147e-05	0.00377131	0	0	6.43539	61.6961	COL1A1;COL1A2;COL4A2;MME;COL5A3;COL6A6;SLC8A1;COL19A1
2201	KEGG_2021_Human	PI3K-Akt signaling pathway	15/354	8.19849e-05	0.00377131	0	0	3.43292	32.3003	LAMA5;TNXB;LPAR1;LAMB1;LPAR4;THBS1;COL1A1;CCND3;COL1A2;CCND2;CDK6;COL4A2;PDGFC;COL6A6;MCL1
2202	KEGG_2021_Human	Human papillomavirus infection	14/331	0.000143939	0.00529697	0	0	3.41664	30.224	LAMA5;JAG1;TNXB;MAML2;LAMB1;THBS1;COL1A1;CCND3;COL1A2;CCND2;CDK6;DLG2;COL4A2;COL6A6
2203	KEGG_2021_Human	Pathways in cancer	18/531	0.000273584	0.00838991	0	0	2.73059	22.4015	LAMA5;JAG1;DAPK1;LPAR1;LAMB1;LPAR4;FOS;PLD1;ETS1;RUNX1;TGFBR2;CCND3;CCND2;CDK6;COL4A2;PLCG2;SKP2;RUNX1T1
2204	KEGG_2021_Human	Proteoglycans in cancer	10/205	0.000424447	0.0111569	0	0	3.92961	30.5124	COL1A1;COL1A2;PLAU;CAV1;PLCG2;GPC3;ANK3;THBS1;CD44;VAV2
2205	KEGG_2021_Human	AGE-RAGE signaling pathway in diabetic complications	6/100	0.00215656	0.0496008	0	0	4.84047	29.7168	COL1A1;EGR1;COL1A2;COL4A2;PLCG2;TGFBR2

## Sheet: e.sc2AvSC1
	p_val	avg_log2FC	pct.1	pct.2	p_val_adj
AC096577.1	0	-8.79191	0.003	0.521	0
XIST	4.97754e-203	-14.6254	0	0.309	0
AC004053.1	2.97283e-173	-5.81188	0.009	0.301	1.0881e-168
TRDN	1.44731e-166	-3.47218	0.074	0.456	5.2973e-162
TRHDE	1.12601e-153	-5.99322	0.008	0.268	4.1213e-149
HS3ST5	3.72597e-135	3.12809	0.596	0.11	1.3637e-130
LINC01239	1.64002e-90	-7.59142	0.001	0.148	6.00263e-86
MT-ND3	1.22103e-89	1.2139	0.857	0.48	4.4691e-85
FKBP5	2.38585e-82	-2.99843	0.051	0.272	8.73244e-78
CXXC4-AS1	1.7891e-81	-3.94402	0.015	0.184	6.5483e-77
COL1A2	5.11528e-76	2.35637	0.455	0.109	1.87224e-71
MT-ND2	4.41555e-74	1.25679	0.705	0.318	1.61613e-69
GREM1	9.63119e-73	-6.07928	0.003	0.127	3.52511e-68
MT-ATP6	1.17007e-71	0.944941	0.838	0.47	4.28258e-67
HDAC2-AS2	1.70118e-71	2.3965	0.445	0.11	6.22649e-67
2001-03-01	1.07942e-67	-2.2459	0.13	0.372	3.9508e-63
TPD52L1	2.2639e-67	-2.85555	0.038	0.219	8.28609e-63
MALAT1	2.58605e-67	-0.552261	0.996	1	9.46519e-63
CXCL14	1.18625e-64	-5.6808	0.003	0.116	4.34181e-60
MTRNR2L12	3.18064e-64	1.69003	0.605	0.259	1.16415e-59
TPRG1	7.05999e-63	-2.59454	0.057	0.249	2.58403e-58
MT-CO2	8.57199e-61	0.977131	0.825	0.507	3.13743e-56
RUNX1	1.49985e-59	2.93887	0.338	0.056	5.4896e-55
MT-CYB	2.10696e-56	0.845376	0.794	0.46	7.71167e-52
SYTL2	9.60671e-56	3.57065	0.277	0.026	3.51615e-51
MT-ND4	4.15988e-55	0.95756	0.734	0.391	1.52256e-50
MT-CO1	5.179e-55	0.763921	0.875	0.546	1.89556e-50
LPL	2.93496e-53	-3.12933	0.018	0.145	1.07422e-48
MT-ND1	1.91942e-49	0.865958	0.731	0.405	7.02527e-45
COL3A1	1.86295e-48	1.39336	0.522	0.24	6.8186e-44
MT-CO3	2.39433e-48	0.623978	0.938	0.652	8.76349e-44
GPC3	8.08748e-47	6.0438	0.205	0.003	2.9601e-42
FN1	5.76783e-44	-2.10633	0.112	0.291	2.11108e-39
MT-ND4L	1.60717e-43	2.07798	0.303	0.066	5.88242e-39
ZBTB16	5.03852e-43	-2.3187	0.053	0.201	1.84415e-38
MTRNR2L8	7.28844e-43	3.78162	0.221	0.02	2.66764e-38
LTBP1	4.86482e-40	-2.54471	0.035	0.16	1.78057e-35
MT-ND5	6.7112e-40	0.985706	0.465	0.191	2.45637e-35
COL1A1	1.32847e-39	3.63459	0.208	0.02	4.86233e-35
FOXP2	6.35761e-39	-1.74592	0.113	0.286	2.32695e-34
DMD	2.41451e-38	1.13795	0.533	0.277	8.83733e-34
AL391117.1	2.59453e-37	-4.80844	0.003	0.072	9.49624e-33
FRMD4A	8.47235e-37	-1.61535	0.168	0.346	3.10096e-32
TRDN-AS1	1.38081e-36	-4.53414	0.003	0.071	5.05392e-32
KCNIP4	1.50222e-35	4.23205	0.182	0.015	5.49828e-31
DYNC1I1	2.11972e-35	-2.40723	0.036	0.153	7.75838e-31
GREB1	2.42233e-35	-4.71202	0.003	0.067	8.86598e-31
CDK6	8.60694e-35	1.23302	0.397	0.163	3.15023e-30
PLCG2	2.36456e-34	3.09346	0.198	0.026	8.65451e-30
RNF150	3.42802e-34	-1.90991	0.105	0.259	1.25469e-29
USP9Y	4.11504e-34	1.43029	0.288	0.076	1.50615e-29
PPARGC1A	2.82416e-33	-2.48946	0.035	0.144	1.03367e-28
RBMS3	8.39114e-33	-0.824502	0.526	0.669	3.07124e-28
ATP1A2	1.98024e-32	-2.11697	0.064	0.193	7.24788e-28
ELL2	4.34455e-32	-2.79873	0.022	0.116	1.59015e-27
PDP1	4.45238e-32	-2.64138	0.027	0.126	1.62962e-27
TANC2	5.65459e-32	1.28255	0.395	0.173	2.06964e-27
GRIA4	5.85007e-32	-3.88435	0.005	0.071	2.14118e-27
AGBL1	1.1585e-31	-2.22036	0.055	0.177	4.24024e-27
NFIA	1.58237e-31	-0.776056	0.542	0.691	5.79162e-27
FAM110B	3.11973e-31	1.3958	0.359	0.147	1.14185e-26
AC079793.1	3.30386e-31	2.3979	0.198	0.033	1.20925e-26
SULF1	1.06458e-30	4.60746	0.15	0.008	3.89646e-26
ANK3	1.56184e-29	3.00417	0.165	0.018	5.71651e-25
ESRRG	5.11245e-29	-1.79675	0.083	0.216	1.87121e-24
TLE4	5.94476e-29	1.03666	0.432	0.211	2.17584e-24
IL1RAP	8.41756e-29	-3.23309	0.009	0.078	3.08091e-24
BNC2	3.34121e-28	1.25703	0.34	0.143	1.22292e-23
AC099792.1	1.11301e-27	-4.72628	0.002	0.051	4.07374e-23
AL133257.1	3.23338e-27	-3.57716	0.009	0.074	1.18345e-22
PLAGL1	3.32645e-27	1.27511	0.365	0.171	1.21751e-22
MEF2A	3.85148e-27	-1.6247	0.123	0.262	1.40968e-22
MIR99AHG	4.35864e-27	-0.999342	0.331	0.496	1.59531e-22
TRIO	1.25493e-26	1.16009	0.372	0.17	4.59316e-22
DAG1	1.611e-26	0.899186	0.489	0.281	5.89642e-22
NLGN4X	3.44934e-26	-2.3101	0.039	0.136	1.26249e-21
PALM2-AKAP2	3.73443e-26	1.82758	0.238	0.075	1.36684e-21
SPARCL1	4.62869e-26	-0.972752	0.338	0.493	1.69415e-21
ESR1	7.44785e-26	-1.57865	0.107	0.24	2.72599e-21
CHRNA1	1.27756e-25	1.30831	0.301	0.119	4.676e-21
OLFML3	1.26933e-24	-4.17273	0.003	0.048	4.64586e-20
CADM2	1.89861e-24	-0.466409	0.88	0.933	6.9491e-20
ARHGAP15	2.17305e-24	2.05571	0.198	0.052	7.95358e-20
TSIX	2.32355e-24	-10.8548	0	0.037	8.50441e-20
HSPG2	3.76364e-24	1.02235	0.367	0.173	1.37753e-19
SLC24A2	5.84778e-24	2.2122	0.189	0.048	2.14034e-19
FOXO1	8.09553e-24	-1.17574	0.192	0.337	2.96305e-19
PTGDS	2.10665e-23	-1.85309	0.069	0.178	7.71056e-19
PSD3	4.35902e-23	1.23106	0.279	0.111	1.59544e-18
RYR2	4.74501e-23	4.42056	0.115	0.007	1.73672e-18
ABCA8	6.82727e-23	-1.21229	0.198	0.339	2.49885e-18
MEGF10	1.44495e-22	0.954466	0.368	0.181	5.28868e-18
ACKR3	1.85962e-22	-2.76018	0.01	0.069	6.80641e-18
SOX5	2.60392e-22	-2.69574	0.015	0.079	9.53062e-18
BMP6	2.71299e-22	-3.73575	0.005	0.054	9.9298e-18
CRISPLD2	2.88095e-22	-1.86633	0.049	0.144	1.05446e-17
HMCN2	2.94553e-22	-0.569656	0.617	0.728	1.07809e-17
RBMS3-AS2	5.44547e-22	-1.49793	0.084	0.197	1.9931e-17
GLIS3	8.66965e-22	2.61743	0.143	0.025	3.17318e-17
NRP1	1.24436e-21	3.89676	0.108	0.006	4.55449e-17
FHOD3	1.37769e-21	-1.65822	0.074	0.18	5.04248e-17
MT-ATP8	1.91104e-21	1.46931	0.216	0.071	6.99461e-17
TRIM9	2.05903e-21	2.48705	0.136	0.021	7.53625e-17
SRGAP1	2.17495e-21	1.61626	0.201	0.062	7.96054e-17
PCDH7	2.77857e-21	1.3233	0.241	0.089	1.01699e-16
TOGARAM2	3.90308e-21	-2.88111	0.01	0.064	1.42857e-16
RYR3	4.26995e-21	-1.01384	0.251	0.389	1.56284e-16
CELF2	4.44828e-21	0.776534	0.509	0.322	1.62811e-16
PHLDB2	5.95219e-21	2.16121	0.149	0.03	2.17856e-16
SPARC	7.28778e-21	0.798583	0.396	0.207	2.6674e-16
ZNF385D	7.32729e-21	1.56517	0.215	0.074	2.68186e-16
MIR4435-2HG	8.25039e-21	1.43364	0.227	0.083	3.01973e-16
KCNQ5	1.065e-20	-1.61416	0.089	0.199	3.89802e-16
GXYLT2	1.07363e-20	1.36415	0.244	0.094	3.92959e-16
FNDC3B	2.18008e-20	0.8541	0.425	0.246	7.97932e-16
CFH	2.86531e-20	1.76696	0.192	0.061	1.04873e-15
PLEKHH2	4.27462e-20	-3.20106	0.015	0.074	1.56455e-15
ITIH5	5.0457e-20	-1.88687	0.038	0.119	1.84678e-15
FBLN7	5.22678e-20	2.12525	0.142	0.028	1.91306e-15
ERBB4	5.54437e-20	-2.35894	0.017	0.08	2.02929e-15
CDH13	8.05509e-20	0.781441	0.458	0.271	2.94824e-15
UTY	1.09445e-19	1.45696	0.178	0.049	4.0058e-15
PITPNC1	2.94436e-19	-1.56172	0.074	0.174	1.07766e-14
TRHDE-AS1	3.76738e-19	-3.58135	0.003	0.04	1.3789e-14
KEL	5.07685e-19	-3.32031	0.004	0.045	1.85818e-14
COL6A1	8.77632e-19	1.03251	0.316	0.156	3.21222e-14
THBS4	1.3271e-18	-2.55593	0.014	0.069	4.85731e-14
SHISA9	1.36829e-18	-3.99246	0.003	0.038	5.00808e-14
TTN	1.37765e-18	1.0724	0.382	0.211	5.04232e-14
UGCG	1.44519e-18	1.78124	0.148	0.036	5.28956e-14
COL6A2	2.10443e-18	1.13044	0.281	0.133	7.70244e-14
NALCN	3.08658e-18	-2.41917	0.013	0.066	1.12972e-13
MACF1	3.13737e-18	0.965459	0.286	0.133	1.14831e-13
ANTXR1	4.21382e-18	0.781275	0.407	0.235	1.5423e-13
ROBO1	4.43643e-18	0.989851	0.253	0.108	1.62378e-13
MEG3	4.6168e-18	-0.445866	0.706	0.769	1.6898e-13
SYTL4	5.35162e-18	-2.3781	0.023	0.087	1.95875e-13
AC105402.3	6.2219e-18	6.65218	0.083	0.002	2.27728e-13
NFIA-AS2	7.22357e-18	-3.77035	0.005	0.044	2.6439e-13
USP53	7.64107e-18	-1.55176	0.067	0.159	2.79671e-13
SORL1	1.9777e-17	-3.04539	0.006	0.048	7.23856e-13
AC012636.1	2.12773e-17	-4.75956	0.001	0.029	7.78772e-13
DLK1	2.33435e-17	-1.39506	0.075	0.171	8.54394e-13
ABLIM1	3.21354e-17	-1.42839	0.113	0.218	1.17619e-12
MME	3.24172e-17	2.96778	0.096	0.01	1.1865e-12
RXRG	1.53702e-16	-2.87528	0.012	0.061	5.62566e-12
RUNX1T1	1.99261e-16	1.50787	0.182	0.066	7.29315e-12
LINC01748	2.51076e-16	-5.45742	0	0.026	9.18963e-12
COL4A2	2.70544e-16	1.23543	0.212	0.088	9.90218e-12
NKAIN3	3.502e-16	-1.89396	0.022	0.08	1.28177e-11
PBX1	3.91217e-16	-1.19306	0.127	0.234	1.43189e-11
SOX13	3.96049e-16	-3.20012	0.006	0.044	1.44958e-11
PREX2	6.09802e-16	-3.29882	0.003	0.034	2.23194e-11
AC068587.4	6.24122e-16	-1.22868	0.103	0.202	2.28435e-11
STK32A	9.21691e-16	-3.0641	0.007	0.046	3.37348e-11
TSHZ2	1.0689e-15	3.01122	0.083	0.007	3.9123e-11
MAML2	1.22545e-15	3.35746	0.087	0.009	4.48528e-11
DCLK1	2.5767e-15	1.68727	0.135	0.038	9.43097e-11
AKAP6	2.58443e-15	1.37611	0.175	0.065	9.45926e-11
DISC1	3.76731e-15	1.30684	0.164	0.057	1.37887e-10
FRY	4.53554e-15	1.0014	0.257	0.128	1.66005e-10
GAREM1	4.88277e-15	0.902007	0.294	0.156	1.78714e-10
MYOF	4.93218e-15	2.16043	0.106	0.021	1.80523e-10
PTPRG	5.37558e-15	-0.654152	0.445	0.552	1.96752e-10
COL4A1	5.3765e-15	1.12038	0.195	0.079	1.96785e-10
DLG2	7.78214e-15	0.882281	0.278	0.143	2.84834e-10
PARM1	8.87077e-15	3.92164	0.072	0.003	3.24679e-10
STUM	1.02354e-14	-2.32044	0.021	0.074	3.74628e-10
TRPV5	1.14861e-14	-5.62303	0.001	0.025	4.20402e-10
PTPN4	1.401e-14	-1.61968	0.064	0.143	5.1278e-10
COL15A1	1.59987e-14	-1.03369	0.138	0.242	5.8557e-10
AC016745.1	2.28402e-14	-2.77344	0.009	0.049	8.35973e-10
SESN3	2.44826e-14	1.39319	0.147	0.048	8.96086e-10
AL392023.2	3.19262e-14	-1.94634	0.019	0.071	1.16853e-09
NCAM2	5.64629e-14	-2.76765	0.011	0.053	2.0666e-09
IGF1R	6.14504e-14	-1.53645	0.042	0.108	2.24915e-09
EGF	6.38774e-14	-2.96063	0.006	0.042	2.33798e-09
LPAR1	6.999e-14	1.84426	0.106	0.025	2.5617e-09
SORBS1	9.60874e-14	2.27573	0.096	0.019	3.5169e-09
SPATS2L	1.40383e-13	0.392363	0.666	0.512	5.13816e-09
FMN1	1.58957e-13	1.1834	0.194	0.085	5.818e-09
KCNMA1	1.80797e-13	2.19285	0.093	0.018	6.61735e-09
AC015923.1	1.91298e-13	1.26635	0.179	0.075	7.00169e-09
CDH23	2.09267e-13	-2.70763	0.01	0.048	7.65938e-09
MEG8	2.13594e-13	-0.389694	0.623	0.706	7.81775e-09
JAG1	3.59506e-13	1.718	0.112	0.03	1.31583e-08
THBS1	3.72005e-13	4.99998	0.062	0.002	1.36158e-08
CAV1	4.05246e-13	1.91453	0.1	0.024	1.48324e-08
GNAS	6.12285e-13	0.544804	0.44	0.287	2.24102e-08
TTTY14	6.51174e-13	0.597553	0.164	0.062	2.38336e-08
AL592156.2	6.85389e-13	-1.4965	0.078	0.156	2.50859e-08
2003-03-01	6.85785e-13	1.42675	0.143	0.052	2.51004e-08
CCDC80	9.27784e-13	1.67346	0.116	0.034	3.39578e-08
ALX4	1.30144e-12	-5.5587	0.001	0.021	4.76342e-08
NEAT1	1.33878e-12	0.521069	0.576	0.426	4.90007e-08
ADAM10	1.47711e-12	1.15654	0.171	0.072	5.40638e-08
SEMA5A	1.84241e-12	3.76494	0.063	0.004	6.74342e-08
CXXC4	1.85658e-12	-2.76101	0.005	0.036	6.79527e-08
TLN2	2.02503e-12	-0.695195	0.394	0.474	7.41183e-08
ARID5B	2.20743e-12	1.41188	0.139	0.051	8.0794e-08
MAP3K5	2.43786e-12	1.0495	0.143	0.053	8.92279e-08
CEP85L	2.49249e-12	-1.42268	0.07	0.144	9.12276e-08
PLPPR1	2.82269e-12	5.6157	0.055	0.001	1.03313e-07
SLF2	3.1219e-12	0.842139	0.252	0.136	1.14265e-07
AC124852.1	3.22061e-12	1.08015	0.155	0.061	1.17877e-07
IGF1	3.95712e-12	-2.20367	0.023	0.072	1.44834e-07
TGFBR2	4.4689e-12	1.48256	0.117	0.037	1.63566e-07
PLAU	5.25264e-12	3.55167	0.063	0.006	1.92252e-07
TSPAN5	7.26106e-12	1.60102	0.116	0.037	2.65762e-07
LINC02456	7.32088e-12	-3.17141	0.012	0.049	2.67952e-07
ECM2	7.41027e-12	0.917929	0.175	0.078	2.71223e-07
CSRP2	7.43195e-12	-3.40607	0.005	0.034	2.72017e-07
POU4F1	8.42325e-12	2.29297	0.079	0.015	3.08299e-07
DKK2	9.4128e-12	1.96518	0.09	0.021	3.44518e-07
CCND2	1.07294e-11	1.7394	0.091	0.021	3.92706e-07
CD44	1.24493e-11	1.09527	0.17	0.074	4.55657e-07
COL6A6	1.29724e-11	2.68779	0.07	0.01	4.74802e-07
NTRK3	1.48366e-11	-2.14585	0.02	0.064	5.43034e-07
ABCA1	1.55387e-11	1.52797	0.109	0.034	5.68732e-07
SLC38A1	1.7615e-11	1.05771	0.137	0.051	6.44728e-07
SLCO2B1	1.79318e-11	-3.57639	0.003	0.026	6.56323e-07
ARHGAP42	1.91416e-11	2.81908	0.069	0.01	7.00602e-07
TTC6	1.91556e-11	-2.96777	0.006	0.035	7.01113e-07
FAM214A	2.54616e-11	-1.2824	0.083	0.156	9.31919e-07
MLXIPL	3.07751e-11	-2.45731	0.008	0.04	1.1264e-06
PLD1	3.61378e-11	3.28584	0.061	0.007	1.32268e-06
PAPSS1	3.9768e-11	1.18071	0.145	0.06	1.45555e-06
BCAT1	4.3303e-11	-3.1555	0.004	0.03	1.58493e-06
GALNT17	4.33432e-11	1.4282	0.102	0.03	1.5864e-06
COL4A4	4.91129e-11	-1.97449	0.023	0.069	1.79758e-06
LRMDA	5.70843e-11	1.87338	0.083	0.019	2.08934e-06
MYL1	6.64891e-11	1.59842	0.104	0.033	2.43357e-06
SLC22A5	8.06755e-11	-2.13689	0.013	0.049	2.9528e-06
PHACTR1	8.22361e-11	2.02152	0.08	0.018	3.00992e-06
PDGFC	8.48625e-11	1.02479	0.153	0.066	3.10605e-06
ENOX1	8.56647e-11	0.75707	0.204	0.102	3.13541e-06
NAV2	9.11794e-11	-0.801215	0.275	0.36	3.33726e-06
PDE4D	1.00501e-10	-1.03816	0.131	0.213	3.67845e-06
KIF16B	1.29197e-10	-1.30186	0.068	0.134	4.72873e-06
RUFY3	1.4557e-10	1.01339	0.162	0.073	5.32799e-06
AK5	1.50263e-10	4.65004	0.049	0.002	5.49979e-06
CDH4	1.70142e-10	-1.03357	0.195	0.278	6.22737e-06
LOXL2	1.74293e-10	3.59704	0.052	0.003	6.3793e-06
AFAP1L2	1.76642e-10	1.75433	0.084	0.021	6.46527e-06
FGFR4	1.84844e-10	0.700828	0.221	0.117	6.76546e-06
NOTCH3	2.07681e-10	0.55094	0.305	0.184	7.60133e-06
TIMP1	2.11382e-10	1.84147	0.09	0.026	7.7368e-06
SLC25A48	2.17093e-10	-4.46594	0.001	0.019	7.94583e-06
LRP4-AS1	2.21988e-10	-1.89804	0.02	0.062	8.125e-06
NTM	2.33228e-10	1.00565	0.114	0.04	8.53638e-06
ADAM19	2.463e-10	1.41263	0.101	0.033	9.01482e-06
AP000331.1	2.59163e-10	2.97896	0.057	0.007	9.48564e-06
CLIP1	2.84371e-10	1.20167	0.134	0.055	1.04083e-05
ZHX3	2.87583e-10	-1.15941	0.1	0.174	1.05258e-05
EGFR	2.96143e-10	-0.704429	0.355	0.432	1.08391e-05
COL5A3	3.05316e-10	2.6059	0.061	0.009	1.11749e-05
HS3ST3A1	3.33836e-10	-3.58742	0.002	0.022	1.22187e-05
VCAN	3.36631e-10	9.41018	0.043	0	1.2321e-05
MOXD1	4.08009e-10	4.02293	0.045	0.001	1.49335e-05
AC016573.1	4.213e-10	-5.26018	0	0.016	1.542e-05
SAMD5	4.34339e-10	2.46344	0.066	0.012	1.58972e-05
GARNL3	4.40707e-10	-1.43717	0.054	0.114	1.61303e-05
DIRC3	4.44943e-10	-0.806479	0.273	0.359	1.62853e-05
DENND2A	4.84624e-10	1.16371	0.117	0.044	1.77377e-05
ADAM12	4.96978e-10	1.21611	0.1	0.033	1.81899e-05
TNXB	5.34511e-10	2.11075	0.07	0.015	1.95636e-05
FAM49A	6.04632e-10	0.830994	0.184	0.092	2.21302e-05
LRRC17	6.82612e-10	2.76698	0.053	0.006	2.49843e-05
LMO7	6.97419e-10	1.91206	0.077	0.019	2.55262e-05
TIMP2	7.39898e-10	1.41962	0.097	0.031	2.7081e-05
PRRX1	7.68999e-10	1.58134	0.09	0.027	2.81461e-05
SLC47A1	8.47518e-10	-1.4171	0.048	0.103	3.102e-05
LAMA5	8.56939e-10	2.22507	0.06	0.009	3.13648e-05
PRKD1	9.13637e-10	-1.23792	0.123	0.196	3.344e-05
ROR1	9.33369e-10	1.24206	0.11	0.04	3.41622e-05
SUN1	9.46272e-10	1.34138	0.102	0.035	3.46345e-05
TSHZ3	9.68152e-10	0.849205	0.187	0.097	3.54353e-05
ANKRD1	1.09606e-09	5.66643	0.043	0.001	4.01168e-05
DAPK2	1.1686e-09	-2.04011	0.012	0.044	4.27718e-05
LRRFIP1	1.24035e-09	0.768325	0.186	0.096	4.53981e-05
GLDN	1.25682e-09	-3.63229	0.003	0.024	4.60009e-05
PLXNA2	1.3416e-09	0.800983	0.171	0.083	4.9104e-05
CGNL1	1.34307e-09	-2.93274	0.001	0.019	4.91576e-05
NCOA1	1.47218e-09	0.426295	0.497	0.372	5.38832e-05
WASF3	1.50057e-09	-2.02322	0.019	0.057	5.49225e-05
NNMT	1.60703e-09	1.43149	0.095	0.031	5.88188e-05
ADGRL3	1.75757e-09	4.42439	0.044	0.002	6.43288e-05
ARHGEF3	1.84038e-09	1.23974	0.092	0.029	6.73598e-05
AL590550.1	1.9657e-09	4.04885	0.042	0.001	7.19467e-05
SLC24A4	2.05328e-09	-5.69701	0	0.015	7.51522e-05
CCNY	2.59369e-09	0.636028	0.229	0.13	9.49315e-05
ZBTB20	2.6576e-09	-0.27429	0.83	0.858	9.72708e-05
NHS	2.74958e-09	3.34452	0.048	0.004	0
SGCD	2.89689e-09	0.538958	0.275	0.166	0
LPP	3.49214e-09	-0.514087	0.371	0.45	0
ACSS3	3.58016e-09	-1.43163	0.05	0.103	0
PDE3A	3.93099e-09	1.76788	0.084	0.026	0
LAMB1	4.06124e-09	2.69291	0.054	0.008	0
AC016987.1	4.43059e-09	-3.19782	0.003	0.024	0
DANT2	4.75648e-09	-0.772451	0.247	0.325	0
KLHL13	5.0382e-09	0.882571	0.183	0.099	0
STK32B	5.74541e-09	4.74765	0.042	0.002	0
COL4A3	5.96978e-09	-2.09323	0.019	0.056	0
SSH2	6.09746e-09	0.473926	0.308	0.193	0
PDE1A	6.22574e-09	-1.14093	0.056	0.112	0
TP63	6.89791e-09	-2.34205	0.013	0.044	0
PRICKLE1	7.08939e-09	2.55065	0.058	0.011	0
AEBP1	7.82219e-09	3.17774	0.046	0.004	0
MAPT	8.16881e-09	-1.84718	0.03	0.073	0
HLA-B	8.34238e-09	0.953235	0.11	0.044	0
EEF1A1	1.14308e-08	0.815878	0.165	0.085	0
FXYD6	1.25696e-08	-2.4738	0.01	0.038	0
ZC2HC1B	1.26061e-08	2.22015	0.059	0.012	0
RFTN2	1.27937e-08	-1.50928	0.029	0.071	0
FOXO3	1.2983e-08	-0.760165	0.173	0.251	0
CEP112	1.30937e-08	0.517581	0.324	0.215	0
IFI16	1.3438e-08	1.24034	0.108	0.044	0
FGFR1	1.36467e-08	0.83661	0.165	0.085	0
VIM	1.59507e-08	0.631622	0.215	0.121	0
ATP10A	1.65121e-08	2.25818	0.055	0.01	0
ABCA9	1.79512e-08	1.20298	0.107	0.044	0
TMEM108	1.8397e-08	1.21811	0.103	0.04	0
EYA1	1.9893e-08	2.05476	0.057	0.011	0
GSE1	2.03369e-08	1.20648	0.112	0.047	0
MYLPF	2.19689e-08	0.92112	0.117	0.049	0
MET	2.33299e-08	0.792565	0.149	0.074	0
PLXDC2	2.43564e-08	-0.52988	0.458	0.517	0
KCNT2	2.55913e-08	1.27421	0.105	0.043	0
SMURF2	2.84759e-08	0.861136	0.128	0.058	0
MAN2A1	3.02049e-08	0.60784	0.197	0.111	0
RHOU	3.08285e-08	-2.11263	0.009	0.036	0
DST	3.31499e-08	0.387384	0.444	0.318	0
CCN1	3.37992e-08	2.24982	0.053	0.01	0
NKAIN2	3.69393e-08	-2.23387	0.016	0.048	0
CYTOR	3.79399e-08	1.47477	0.081	0.027	0
DAPK1	3.79709e-08	3.31787	0.04	0.003	0
RASAL2	4.07212e-08	0.726377	0.138	0.066	0
RBM5	4.31601e-08	0.966325	0.123	0.056	0
RNF217	4.35088e-08	-1.44986	0.053	0.103	0
EYA4	4.40702e-08	-0.91909	0.14	0.207	0
ABCC5	4.69455e-08	-1.5129	0.04	0.085	0
MIR3936HG	5.34598e-08	-1.48744	0.032	0.073	0
SRPX2	5.72616e-08	-1.54047	0.055	0.106	0
DAB2	6.26984e-08	2.30194	0.054	0.011	0
NLGN4Y	6.3692e-08	1.05589	0.096	0.037	0
MCC	6.38188e-08	0.823662	0.136	0.066	0
DOCK10	6.41736e-08	1.91942	0.05	0.009	0
ZEB2	6.61328e-08	0.397981	0.468	0.349	0
ILF3-DT	6.90661e-08	-2.27232	0.012	0.04	0
B2M	6.93721e-08	0.810945	0.15	0.078	0
DKK3	7.28479e-08	2.48027	0.045	0.007	0
PCDH19	7.52659e-08	8.85202	0.032	0	0
GLT8D2	7.90696e-08	1.28862	0.086	0.031	0
NCKAP5	8.40645e-08	0.99908	0.12	0.056	0
SIK3	9.2758e-08	0.590478	0.192	0.109	0
SFMBT2	9.89016e-08	2.05748	0.051	0.01	0
ASAP1	1.03182e-07	0.950904	0.112	0.049	0
RNF217-AS1	1.04476e-07	-1.63602	0.019	0.053	0
COL19A1	1.05408e-07	3.38828	0.04	0.004	0
COL4A5	1.13635e-07	-3.70992	0.001	0.016	0
ZNF727	1.15093e-07	-9.14602	0	0.01	0
AL355835.1	1.20347e-07	-1.67698	0.021	0.055	0
NEB	1.21806e-07	0.418811	0.323	0.216	0
APOE	1.30769e-07	-0.423475	0.427	0.486	0
BCAR3	1.34261e-07	0.809687	0.122	0.057	0
AC007563.2	1.34634e-07	-2.16697	0.016	0.046	0
KIRREL1	1.49429e-07	1.18407	0.088	0.034	0
AGAP1	1.56822e-07	0.658325	0.194	0.114	0
ZNF608	1.57191e-07	0.943127	0.087	0.033	0
ABLIM2	1.64773e-07	-1.98958	0.012	0.038	0
RGN	1.66137e-07	-2.41542	0.009	0.033	0
CLIC4	1.68619e-07	1.03941	0.111	0.051	0
LPIN3	2.02925e-07	-2.60829	0.004	0.021	0
RBMS3-AS3	2.05733e-07	-1.30098	0.036	0.078	0
ST5	2.28434e-07	0.525738	0.268	0.173	0
H19	2.29919e-07	0.934427	0.125	0.062	0
PLPP3	2.4409e-07	-1.22536	0.058	0.107	0
CAPN2	2.45402e-07	1.07824	0.108	0.049	0
MB	2.50166e-07	0.989982	0.119	0.057	0
SLC24A3	2.54017e-07	1.37027	0.071	0.024	0
STIM2	2.66939e-07	0.951139	0.09	0.036	0
ACACB	2.71358e-07	-1.45151	0.038	0.08	0
ARHGAP26	2.76445e-07	0.898207	0.139	0.072	0
RIC3	3.00599e-07	-3.55301	0.003	0.019	0
HDAC4	3.05273e-07	0.85494	0.088	0.035	0
CA3	3.07697e-07	1.40937	0.069	0.022	0
AL033504.1	3.10926e-07	2.04249	0.047	0.009	0
CCND3	3.14627e-07	1.60986	0.056	0.015	0
MYBPC1	3.1474e-07	0.807508	0.145	0.076	0
TACR3	3.17349e-07	1.10298	0.081	0.03	0
IP6K3	3.48533e-07	-1.61989	0.02	0.052	0
RHOBTB3	3.51275e-07	-0.924715	0.14	0.204	0
PICALM	3.56668e-07	0.733148	0.169	0.096	0
ZNF521	3.6554e-07	0.756897	0.11	0.052	0
MAP4K4	3.94076e-07	0.63526	0.154	0.083	0
KLHL29	4.29565e-07	-1.49254	0.03	0.066	0
SLC16A9	4.33269e-07	-3.23302	0.002	0.017	0
AMOTL1	4.51317e-07	1.4171	0.061	0.018	0
LPAR4	4.61103e-07	3.84779	0.033	0.002	0
MAPK4	4.71511e-07	-3.36079	0.001	0.013	0
PRDM1	4.80644e-07	-2.56871	0.002	0.016	0
CRLF1	4.82216e-07	-2.65994	0.005	0.025	0
CSNK1A1	4.97231e-07	0.568979	0.174	0.1	0
L1CAM	5.05889e-07	4.2723	0.03	0.001	0
ADAMTS14	5.27196e-07	2.21315	0.035	0.003	0
GPM6B	5.30736e-07	0.780583	0.133	0.07	0
ANKRD28	5.31666e-07	0.838231	0.132	0.069	0
CTNNA1	5.4458e-07	0.645578	0.121	0.06	0
BAIAP2L1	5.55839e-07	3.69116	0.032	0.002	0
FOS	5.69729e-07	3.04531	0.039	0.006	0
FGL2	5.88056e-07	0.841874	0.123	0.062	0
AC099560.1	6.04606e-07	8.84674	0.027	0	0
TNPO1	6.8699e-07	0.540629	0.179	0.105	0
ZBTB7C	7.07196e-07	0.650536	0.15	0.082	0
PBX3	7.30792e-07	1.83938	0.052	0.013	0
CASK	7.39585e-07	0.594845	0.144	0.076	0
PROS1	7.40079e-07	1.35635	0.07	0.025	0
FRMD6	7.87288e-07	1.03923	0.104	0.048	0
FLNC	8.30461e-07	1.05183	0.094	0.042	0
PTPRQ	8.53661e-07	4.12832	0.029	0.001	0
AC110296.1	8.54904e-07	3.93711	0.029	0.001	0
ARHGAP18	8.86817e-07	1.10185	0.085	0.035	0
RPS27	8.97198e-07	0.709606	0.132	0.069	0
LINC01956	9.00604e-07	-2.66709	0.009	0.031	0
DTNA	9.66181e-07	0.480439	0.279	0.19	0
MTHFD2	9.72951e-07	-2.64948	0.005	0.022	0
MIR924HG	9.77523e-07	1.40802	0.062	0.02	0
ARHGAP24	1.00415e-06	0.366424	0.456	0.344	0
DDX3Y	1.01121e-06	2.08352	0.044	0.009	0
SASH1	1.02357e-06	0.523396	0.226	0.146	0
PTPRD	1.07899e-06	1.20346	0.07	0.025	0
RNF144A	1.0834e-06	-1.34984	0.034	0.071	0
COLEC12	1.12839e-06	1.05748	0.089	0.038	0
AUTS2	1.21237e-06	0.401865	0.321	0.225	0
KCNT1	1.25127e-06	1.98573	0.045	0.01	0
STK39	1.2551e-06	-1.45766	0.04	0.08	0
EXT1	1.27618e-06	0.408214	0.282	0.192	0
ABI3BP	1.27986e-06	-0.747743	0.149	0.211	0
HLA-A	1.32655e-06	0.707668	0.143	0.079	0
PNMT	1.33873e-06	-1.39244	0.014	0.04	0
TSPAN12	1.4767e-06	2.03839	0.041	0.008	0
LRP4	1.48386e-06	-1.11419	0.04	0.08	0
BMPR1B	1.5358e-06	1.73232	0.054	0.016	0
FAT1	1.63609e-06	1.03774	0.08	0.033	0
CLVS1	1.70934e-06	-2.20527	0.009	0.031	0
COL11A1	1.74226e-06	-3.20566	0.002	0.016	0
CDKN1C	1.78083e-06	0.861694	0.106	0.052	0
MYO1B	1.80312e-06	1.04742	0.094	0.043	0
LINC00482	1.81859e-06	-3.50874	0.001	0.011	0
MCU	1.87572e-06	1.26631	0.074	0.029	0
LONRF1	1.9061e-06	-1.33313	0.032	0.067	0
SPIDR	2.02159e-06	0.380613	0.258	0.172	0
NEURL1B	2.07279e-06	2.70398	0.038	0.007	0
SPHK2	2.07827e-06	-1.77655	0.015	0.042	0
LINC02176	2.07831e-06	-3.86675	0.001	0.012	0
TRPS1	2.08304e-06	-0.636661	0.24	0.305	0
AL513164.1	2.08962e-06	1.88459	0.046	0.011	0
BCL2	2.12925e-06	-0.765781	0.167	0.229	0
AC004069.1	2.13199e-06	-3.40974	0.001	0.013	0
MLX	2.14079e-06	-1.87282	0.013	0.037	0
PER1	2.14456e-06	-1.2117	0.052	0.094	0
ATXN1	2.14644e-06	0.690749	0.116	0.058	0
LIPC	2.16096e-06	2.30948	0.038	0.007	0
RBFOX2	2.22647e-06	0.450709	0.244	0.162	0
CNKSR3	2.27843e-06	-0.830745	0.157	0.217	0
BACH1	2.27892e-06	1.08777	0.079	0.033	0
SIRT2	2.31247e-06	-1.08559	0.081	0.13	0
ANKRD13A	2.35711e-06	0.840474	0.123	0.065	0
ARHGAP10	2.38859e-06	0.980998	0.079	0.033	0
LINC02821	2.39184e-06	1.75102	0.046	0.011	0
SPTLC3	2.49632e-06	1.81467	0.046	0.011	0
EMC10	2.53376e-06	1.27075	0.065	0.024	0
LYST	2.5359e-06	0.774332	0.116	0.06	0
MYO18B	2.54175e-06	0.321957	0.345	0.241	0
WWTR1	2.57831e-06	0.732771	0.129	0.07	0
SGCE	2.59115e-06	0.430747	0.226	0.147	0
ITGB5	2.75255e-06	0.92676	0.071	0.027	0
TRIM22	2.91147e-06	1.19346	0.079	0.034	0
GSK3B	3.14785e-06	0.727708	0.14	0.079	0
CTNNB1	3.30987e-06	0.626464	0.14	0.078	0
GRK3	3.34194e-06	0.477099	0.163	0.096	0
CDK17	3.37265e-06	1.09355	0.081	0.035	0
SLC6A1	3.41229e-06	-1.58123	0.017	0.044	0
RNF180	3.4867e-06	-1.28723	0.052	0.093	0
FGGY	3.62162e-06	0.603721	0.148	0.084	0
ABL1	3.6425e-06	0.597498	0.117	0.061	0
AC025171.1	3.90792e-06	1.57426	0.041	0.009	0
KDM4C	3.99741e-06	0.853884	0.112	0.058	0
KCNS3	4.02917e-06	-0.974898	0.038	0.075	0
EVC	4.1789e-06	1.29438	0.057	0.019	0
ERFE	4.23922e-06	1.56425	0.054	0.017	0
MT-ND6	4.26693e-06	0.660315	0.134	0.074	0
RTN1	4.30623e-06	-2.43537	0.003	0.017	0
JUNB	4.33087e-06	3.69191	0.028	0.002	0
KY	4.36218e-06	0.935219	0.079	0.034	0
DYRK1A	4.39825e-06	0.754796	0.139	0.079	0
SLC16A7	4.59653e-06	-1.76012	0.011	0.034	0
IQGAP1	4.61693e-06	0.805177	0.122	0.065	0
TGFB2	4.6506e-06	0.884235	0.115	0.061	0
AKAP13	4.78298e-06	0.468641	0.252	0.171	0
CECR2	4.89704e-06	0.434383	0.203	0.128	0
ABHD17B	5.16521e-06	1.01577	0.074	0.03	0
STARD13	5.31129e-06	0.636086	0.134	0.074	0
C1R	5.36946e-06	1.16783	0.086	0.039	0
CAMK2D	5.49381e-06	0.651373	0.16	0.096	0
SCML1	5.52699e-06	0.72418	0.115	0.061	0
PTGFR	5.5537e-06	2.45715	0.036	0.007	0
DUBR	5.6381e-06	1.21135	0.064	0.024	0
AC119674.1	5.67113e-06	-1.34615	0.025	0.055	0
AC005323.2	5.76603e-06	-1.94871	0.01	0.031	0
EGR1	5.7849e-06	2.51657	0.036	0.007	0
VCL	5.81156e-06	0.998636	0.067	0.026	0
MUSK	5.84432e-06	0.362708	0.243	0.161	0
FSTL1	6.04969e-06	1.32221	0.058	0.02	0
YEATS2	6.11976e-06	0.939742	0.075	0.031	0
VAV2	6.40426e-06	1.13739	0.063	0.024	0
BCL7A	6.54348e-06	-1.55367	0.025	0.055	0
ACTC1	6.65028e-06	4.62214	0.025	0.001	0
NRCAM	6.71496e-06	2.33884	0.03	0.003	0
ANKRD36C	6.89366e-06	-0.893304	0.114	0.166	0
GIT2	6.96599e-06	0.593583	0.117	0.063	0
MIR29B2CHG	6.99207e-06	-1.08452	0.052	0.092	0
FGD5	6.99547e-06	-2.63881	0.002	0.015	0
PIK3R1	7.10487e-06	-1.0327	0.093	0.142	0
GALNT2	7.20939e-06	1.0486	0.07	0.028	0
SLN	7.49552e-06	1.75698	0.04	0.009	0
ACADL	7.68367e-06	-1.53534	0.016	0.042	0
EBF3	7.92437e-06	0.544508	0.155	0.091	0
TENM3	7.93463e-06	1.91196	0.039	0.009	0
NR3C1	7.96417e-06	0.392817	0.343	0.251	0
MYH7	7.97535e-06	0.760111	0.105	0.054	0
LINC00607	8.32784e-06	-4.38994	0.001	0.01	0
DHRS3	8.35047e-06	-2.1876	0.002	0.013	0
LRRTM3	8.37029e-06	-1.74752	0.012	0.035	0
EVL	8.43656e-06	0.687103	0.136	0.079	0
S100A6	8.63183e-06	0.689742	0.167	0.103	0
LMX1A	8.65035e-06	-2.54613	0.004	0.018	0
ADAMTS6	8.72726e-06	1.13593	0.078	0.035	0
EMILIN1	8.73986e-06	1.20637	0.059	0.021	0
CYTH3	8.89867e-06	1.48733	0.039	0.009	0
AUXG01000058.1	8.97505e-06	0.826942	0.106	0.055	0
ARHGAP5	9.12794e-06	0.634192	0.105	0.054	0
CDK8	9.29772e-06	-0.541313	0.317	0.375	0
AC025171.2	9.42557e-06	1.55814	0.041	0.01	0
U91319.1	9.49955e-06	-2.28805	0.001	0.011	0
MVP	9.5054e-06	1.89216	0.039	0.009	0
PCOLCE	9.64944e-06	2.91927	0.033	0.006	0
NPNT	9.70066e-06	8.0823	0.022	0	0
RAI14	1.02521e-05	1.60511	0.041	0.01	0
TSC22D3	1.04004e-05	-1.70697	0.021	0.048	0
STXBP6	1.06622e-05	1.51357	0.048	0.015	0
LEPR	1.14185e-05	-1.49207	0.02	0.047	0
AL603840.1	1.14993e-05	-3.03369	0.003	0.017	0
FAM171A1	1.1626e-05	1.70779	0.046	0.013	0
ADAMTS2	1.1646e-05	1.1916	0.058	0.021	0
LRP1	1.19381e-05	0.352137	0.203	0.129	0
NLGN1	1.19657e-05	-1.47555	0.017	0.042	0
ESF1	1.21258e-05	-0.820514	0.081	0.127	0
ANK2	1.24656e-05	0.422592	0.273	0.196	0
LMCD1-AS1	1.25126e-05	-1.22651	0.047	0.084	0
CITED4	1.31486e-05	-1.988	0.008	0.026	0
TMBIM6	1.33733e-05	0.87299	0.081	0.037	0

## Sheet: f.sc2AvSC1Enrichr
	i	Term	Overlap	P.value	Adjusted.P.value	Old.P.value	Old.Adjusted.P.value	Odds.Ratio	Combined.Score	Genes
1	GO_Biological_Process_2023	Regulation Of Cell Migration (GO:0030334)	33/434	6.8175e-10	1.52848e-06	0	0	3.8739	81.7638	SEMA5A;MACF1;CLIC4;TNXB;FOXO3;THBS1;EGFR;ROBO1;IGF1R;DOCK10;PLAU;ERBB4;PDGFC;PLXNA2;DAG1;PHACTR1;SRGAP1;SASH1;MAP4K4;JAG1;EGF;NTRK3;CAV1;ADAM10;LAMB1;IGF1;SULF1;SORL1;COL1A1;DAB2;RUFY3;CDH13;AMOTL1
2	GO_Biological_Process_2023	Regulation Of Canonical Wnt Signaling Pathway (GO:0060828)	20/207	3.48344e-08	3.90493e-05	0	0	4.93328	84.7176	SEMA5A;TLE4;SMURF2;CSNK1A1;EGF;CAV1;SOX13;PRICKLE1;MCC;DKK2;EGFR;DKK3;COL1A1;GREM1;ZEB2;DAB2;CCNY;GPC3;APOE;RBMS3
3	GO_Biological_Process_2023	Extracellular Matrix Organization (GO:0030198)	17/176	3.73538e-07	0.000279157	0	0	4.90383	72.5779	COL15A1;ECM2;ADAM10;COL19A1;LOXL2;COL1A1;GREM1;ADAMTS14;COL3A1;CCDC80;COL1A2;COL4A2;COL4A1;COL5A3;COL4A3;COL4A5;GPM6B
4	GO_Biological_Process_2023	Extracellular Structure Organization (GO:0043062)	13/109	8.15719e-07	0.00040032	0	0	6.17272	86.5365	COL15A1;ECM2;COL19A1;COL1A1;ADAMTS14;COL3A1;CCDC80;COL1A2;COL4A2;COL4A1;COL5A3;COL4A3;COL4A5
5	GO_Biological_Process_2023	External Encapsulating Structure Organization (GO:0045229)	13/110	9.06818e-07	0.00040032	0	0	6.10877	84.9932	COL15A1;ECM2;COL19A1;COL1A1;ADAMTS14;COL3A1;CCDC80;COL1A2;COL4A2;COL4A1;COL5A3;COL4A3;COL4A5
6	GO_Biological_Process_2023	Skeletal System Development (GO:0001501)	15/149	1.07133e-06	0.00040032	0	0	5.11659	70.3358	LAMA5;ZBTB16;IGF1;SULF1;BMP6;COL19A1;PAPSS1;COL1A1;EXT1;COL1A2;GNAS;ALX4;CD44;SOX5;FGFR1
7	GO_Biological_Process_2023	Regulation Of Kinase Activity (GO:0043549)	1985-11-01	2.54729e-06	0.000728917	0	0	6.75191	86.9678	CCNY;ERBB4;NTRK3;ROR1;MAPT;FGFR4;MET;EGFR;IGF1R;TTN;FGFR1
8	GO_Biological_Process_2023	Positive Regulation Of Cell Migration (GO:0030335)	20/272	2.78812e-06	0.000728917	0	0	3.64853	46.6652	SEMA5A;SMURF2;EGF;CAV1;NTRK3;FN1;ADAM10;LAMB1;IGF1;THBS1;EGFR;IGF1R;COL1A1;DAB2;PLAU;RUFY3;PDGFC;PLCG2;CDH13;MAP4K4
9	GO_Biological_Process_2023	Negative Regulation Of Epithelial Cell Proliferation (GO:0050680)	1970-10-01	2.92607e-06	0.000728917	0	0	7.55814	96.3047	SPARC;CDK6;CAV1;CASK;APOE;MCC;SULF1;B2M;THBS1;ROBO1
10	GO_Biological_Process_2023	Positive Regulation Of Wnt Signaling Pathway (GO:0030177)	12/109	5.04953e-06	0.00113211	0	0	5.62569	68.6121	SEMA5A;COL1A1;MACF1;ZEB2;SMURF2;EGF;CAV1;GPC3;DISC1;SULF1;DKK2;EGFR
11	GO_Biological_Process_2023	Negative Regulation Of Canonical Wnt Signaling Pathway (GO:0090090)	12/114	8.06182e-06	0.00160217	0	0	5.34854	62.7297	TLE4;GREM1;DAB2;CSNK1A1;CAV1;SOX13;APOE;PRICKLE1;MCC;DKK2;DKK3;RBMS3
12	GO_Biological_Process_2023	Positive Regulation Of Cell Motility (GO:2000147)	17/221	8.57538e-06	0.00160217	0	0	3.81324	44.4876	SEMA5A;EGF;CAV1;NTRK3;ADAM10;LAMB1;IGF1;THBS1;EGFR;IGF1R;COL1A1;DAB2;PLAU;RUFY3;PDGFC;CDH13;MAP4K4
13	GO_Biological_Process_2023	Regulation Of Cell-Matrix Adhesion (GO:0001952)	1965-09-01	1.19439e-05	0.00205987	0	0	7.27279	82.4391	MACF1;JAG1;CDK6;PLAU;CASK;CDH13;THBS1;GPM6B;MAP4K4
14	GO_Biological_Process_2023	Negative Regulation Of Wnt Signaling Pathway (GO:0030178)	13/140	1.35215e-05	0.00213858	0	0	4.65856	52.2282	TLE4;CSNK1A1;CAV1;SOX13;PRICKLE1;MCC;CXXC4;DKK2;DKK3;GREM1;DAB2;APOE;RBMS3
15	GO_Biological_Process_2023	Positive Regulation Of Ras Protein Signal Transduction (GO:0046579)	1951-08-01	1.43081e-05	0.00213858	0	0	8.40525	93.758	COL3A1;AUTS2;ARHGEF3;LPAR1;LPAR4;IGF1;ROBO1;MAP4K4
16	GO_Biological_Process_2023	Positive Regulation Of MAPK Cascade (GO:0043410)	20/310	1.93922e-05	0.00271733	0	0	3.1642	34.3336	BCAR3;EGF;NTRK3;LPAR1;IGF1;TPD52L1;THBS1;EGFR;ROBO1;IGF1R;GAREM1;ERBB4;PDGFC;PLCG2;ACKR3;ROR1;APOE;FGFR4;CD44;FGFR1
17	GO_Biological_Process_2023	Positive Regulation Of Cell Population Proliferation (GO:0008284)	26/483	2.81751e-05	0.00352297	0	0	2.62518	27.5042	HDAC4;TNXB;MEGF10;THBS1;EGFR;IGF1R;CCND2;ERBB4;PDGFC;TIMP1;EGF;NTRK3;FN1;ADAM10;LAMB1;IGF1;BMP6;TGFBR2;GREM1;MLXIPL;CDK6;GAREM1;CDH13;FGFR4;CRLF1;FGFR1
18	GO_Biological_Process_2023	Neuron Development (GO:0048666)	13/150	2.82843e-05	0.00352297	0	0	4.3163	45.2054	TNXB;PBX3;LAMB1;FRY;L1CAM;POU4F1;PBX1;RUNX1;UGCG;TMEM108;DMD;APOE;MAPT
19	GO_Biological_Process_2023	Positive Regulation Of MAP Kinase Activity (GO:0043406)	1991-10-01	3.14404e-05	0.00370997	0	0	5.59259	57.9807	EGF;NTRK3;PDGFC;TPD52L1;THBS1;EGFR;SASH1;ROBO1;MAP3K5;FGFR1
20	GO_Biological_Process_2023	Regulation Of Endothelial Cell Proliferation (GO:0001936)	1993-10-01	3.80115e-05	0.00426109	0	0	5.45727	55.542	SEMA5A;SPARC;EGF;CAV1;CDH13;PRKD1;APOE;SULF1;THBS1;THBS4
21	GO_Biological_Process_2023	Positive Regulation Of Biosynthetic Process (GO:0009891)	2044-07-01	4.50918e-05	0.00462638	0	0	8.53012	85.3593	MLXIPL;PLCG2;ZBTB20;APOE;SORBS1;VIM;RUNX1
22	GO_Biological_Process_2023	Positive Regulation Of Axon Extension (GO:0045773)	2019-05-01	4.53971e-05	0.00462638	0	0	16.0476	160.477	SEMA5A;MACF1;RUFY3;MAPT;L1CAM
23	GO_Biological_Process_2023	Positive Regulation Of Protein Serine/Threonine Kinase Activity (GO:0071902)	11/117	5.52132e-05	0.00538209	0	0	4.70585	46.1376	CCND3;CCND2;CCNY;EGF;NTRK3;PDGFC;TPD52L1;THBS1;EGFR;FGFR1;ROBO1
24	GO_Biological_Process_2023	Positive Regulation Of Cellular Process (GO:0048522)	29/594	5.81928e-05	0.00543618	0	0	2.37218	23.1329	HDAC4;RYR2;TNXB;AKAP6;THBS1;EGFR;IGF1R;CCND2;ERBB4;PDGFC;TIMP1;TNPO1;EGF;NTRK3;CAV1;FN1;ADAM10;LAMB1;IGF1;BMP6;TGFBR2;GREM1;MLXIPL;GAREM1;MYL1;MAPT;FGFR4;CRLF1;FGFR1
25	GO_Biological_Process_2023	Transmembrane Receptor Protein Tyrosine Kinase Signaling Pathway (GO:0007169)	18/284	6.31368e-05	0.00566211	0	0	3.09386	29.9183	BCAR3;NTRK3;IGF1;SORBS1;SULF1;EGFR;FOXO1;PTPRG;IGF1R;COL4A2;KIF16B;ERBB4;PDGFC;ROR1;PRKD1;FGFR4;MET;FGFR1
26	GO_Biological_Process_2023	Positive Regulation Of Transferase Activity (GO:0051347)	12/143	7.82127e-05	0.00674434	0	0	4.15831	39.3213	GREM1;PARM1;ERBB4;NTRK3;ROR1;APOE;FGFR4;MET;SORL1;EGFR;IGF1R;FGFR1
27	GO_Biological_Process_2023	Regulation Of Release Of Sequestered Calcium Ion Into Cytosol By Sarcoplasmic Reticulum (GO:0010880)	2022-05-01	9.73612e-05	0.00807427	0	0	13.2137	122.056	RYR2;PDE4D;ATP1A2;DMD;TRDN
28	GO_Biological_Process_2023	Positive Regulation Of Canonical Wnt Signaling Pathway (GO:0090263)	1985-09-01	0.00010444	0.00807427	0	0	5.3534	49.0741	SEMA5A;COL1A1;ZEB2;SMURF2;EGF;CAV1;GPC3;DKK2;EGFR
29	GO_Biological_Process_2023	Positive Regulation Of Endothelial Cell Migration (GO:0010595)	1985-09-01	0.00010444	0.00807427	0	0	5.3534	49.0741	SEMA5A;SPARC;EGF;PRKD1;PLPP3;MET;THBS1;SASH1;FGFR1
30	GO_Biological_Process_2023	Skin Development (GO:0043588)	1968-08-01	0.0001199	0.00896056	0	0	6.01852	54.3403	COL1A1;UGCG;CLIC4;COL3A1;JAG1;COL1A2;COL5A3;FGFR1
31	GO_Biological_Process_2023	Positive Regulation Of Phosphatidylinositol 3-Kinase Signaling (GO:0014068)	1969-08-01	0.000133055	0.00962291	0	0	5.91955	52.8305	EGF;NTRK3;PDGFC;FN1;ROR1;IGF1;IGF1R;FGFR1
32	GO_Biological_Process_2023	Negative Regulation Of Endothelial Cell Proliferation (GO:0001937)	2037-06-01	0.00014286	0.0100091	0	0	8.70923	77.1084	SPARC;CAV1;COL4A3;APOE;SULF1;THBS1
33	GO_Biological_Process_2023	Regulation Of Phosphatidylinositol 3-Kinase Signaling (GO:0014066)	1990-09-01	0.000162656	0.010803	0	0	5.02166	43.8083	EGF;NTRK3;PDGFC;FN1;ROR1;IGF1;EGFR;IGF1R;FGFR1
34	GO_Biological_Process_2023	Positive Regulation Of Axonogenesis (GO:0050772)	2038-06-01	0.000166527	0.010803	0	0	8.43664	73.4017	MACF1;RUFY3;PLXNA2;MAPT;L1CAM;ROBO1
35	GO_Biological_Process_2023	Cellular Response To Growth Factor Stimulus (GO:0071363)	12/155	0.000168646	0.010803	0	0	3.80701	33.0742	EEF1A1;GAREM1;NTRK3;PDE3A;ANKRD1;PRKD1;MAPT;BMP6;CD44;EGFR;SOX5;TGFBR2
36	GO_Biological_Process_2023	Calcium Ion Transport (GO:0006816)	10/112	0.00018389	0.0114522	0	0	4.43639	38.1582	SLC24A2;RYR2;SLC24A4;SLC24A3;STIM2;CAV1;TRPV5;CDH23;NALCN;RYR3
37	GO_Biological_Process_2023	Regulation Of Endothelial Cell Chemotaxis (GO:2001026)	2014-04-01	0.000194143	0.0114544	0	0	17.9358	153.296	SEMA5A;PRKD1;THBS1;MET
38	GO_Biological_Process_2023	Positive Regulation Of Endothelial Cell Chemotaxis (GO:2001028)	2014-04-01	0.000194143	0.0114544	0	0	17.9358	153.296	SEMA5A;PRKD1;MET;FGFR1
39	GO_Biological_Process_2023	Release Of Sequestered Calcium Ion Into Cytosol By Sarcoplasmic Reticulum (GO:0014808)	2026-06-03	0.000201314	0.011573	0	0	44.7529	380.876	RYR2;RYR3;TRDN
40	GO_Biological_Process_2023	Regulation Of Peptidyl-Serine Phosphorylation (GO:0033135)	1993-09-01	0.000209059	0.0116314	0	0	4.84156	41.0221	BCAR3;MLXIPL;PDE4D;CAV1;NTRK3;DMD;PRKD1;CD44;EGFR
41	GO_Biological_Process_2023	Regulation Of MAP Kinase Activity (GO:0043405)	10/114	0.000212707	0.0116314	0	0	4.35063	36.7871	EGF;NTRK3;PDGFC;APOE;TPD52L1;THBS1;SORL1;EGFR;FGFR1;ROBO1
42	GO_Biological_Process_2023	Striated Muscle Contraction (GO:0006941)	1957-07-01	0.000243353	0.0129615	0	0	6.30808	52.4896	CHRNA1;RYR2;DTNA;ATP1A2;DMD;RYR3;TTN
43	GO_Biological_Process_2023	Heart Contraction (GO:0060047)	2041-06-01	0.000256549	0.0129615	0	0	7.71231	63.7669	RYR2;SGCD;ATP1A2;DMD;TTN;TRDN
44	GO_Biological_Process_2023	Cardiac Myofibril Assembly (GO:0055003)	2015-04-01	0.000260156	0.0129615	0	0	16.3044	134.58	FHOD3;MEF2A;NEB;TTN
45	GO_Biological_Process_2023	Positive Regulation Of Cyclin-Dependent Protein Serine/Threonine Kinase Activity (GO:0045737)	2015-04-01	0.000260156	0.0129615	0	0	16.3044	134.58	CCND3;CCND2;CCNY;EGFR
46	GO_Biological_Process_2023	Negative Regulation Of Cell Migration (GO:0030336)	12/163	0.000269443	0.0131324	0	0	3.60382	29.6204	CLIC4;COL3A1;JAG1;DAG1;TIMP1;FOXO3;MCC;SULF1;PHLDB2;SRGAP1;PTPRG;ROBO1
47	GO_Biological_Process_2023	Positive Regulation Of Signal Transduction (GO:0009967)	16/266	0.000288342	0.0137235	0	0	2.91472	23.7589	MACF1;JAG1;TNXB;LAMB1;IGF1;SORBS1;SULF1;TPD52L1;SORL1;BMP6;ROBO1;TMEM108;TSPAN5;DISC1;TP63;SASH1
48	GO_Biological_Process_2023	Collagen Fibril Organization (GO:0030199)	2042-06-01	0.000293812	0.0137235	0	0	7.4977	60.9755	COL1A1;GREM1;COL3A1;COL1A2;COL5A3;LOXL2
49	GO_Biological_Process_2023	Intracellular Monoatomic Cation Homeostasis (GO:0030003)	13/190	0.000310908	0.0142256	0	0	3.33398	26.9253	SLC24A2;RYR2;SLC24A4;SLC24A3;CAV1;ATP1A2;BMP6;TRDN;STIM2;KCNMA1;RGN;B2M;PICALM
50	GO_Biological_Process_2023	Neuron Projection Development (GO:0031175)	13/192	0.000343999	0.0146595	0	0	3.29639	26.2883	TRIO;TNXB;LAMB1;FRY;L1CAM;POU4F1;DCLK1;DOCK10;TMEM108;APOE;MAPT;GPM6B;MAP4K4
51	GO_Biological_Process_2023	Cardiac Muscle Hypertrophy (GO:0003300)	2026-07-03	0.000346545	0.0146595	0	0	33.5629	267.413	HDAC4;RYR2;TTN
52	GO_Biological_Process_2023	Release Of Sequestered Calcium Ion Into Cytosol By Endoplasmic Reticulum (GO:1903514)	2026-07-03	0.000346545	0.0146595	0	0	33.5629	267.413	RYR2;RYR3;TRDN
53	GO_Biological_Process_2023	Positive Regulation Of Gluconeogenesis (GO:0045722)	2026-07-03	0.000346545	0.0146595	0	0	33.5629	267.413	NNMT;PPARGC1A;FOXO1
54	GO_Biological_Process_2023	Positive Regulation Of Chemotaxis (GO:0050921)	2044-06-01	0.000380997	0.0157668	0	0	7.10235	55.9148	SEMA5A;NTRK3;CDH13;PRKD1;THBS1;MET
55	GO_Biological_Process_2023	Sarcomere Organization (GO:0045214)	2029-05-01	0.000386787	0.0157668	0	0	9.35632	73.5186	FHOD3;CSRP2;ANKRD1;FLNC;TTN
56	GO_Biological_Process_2023	Calcium Ion Homeostasis (GO:0055074)	9/102	0.000418559	0.0165185	0	0	4.37101	34.0007	SLC24A2;RYR2;SLC24A4;SLC24A3;STIM2;CAV1;TRPV5;RGN;TRDN
57	GO_Biological_Process_2023	Enzyme-Linked Receptor Protein Signaling Pathway (GO:0007167)	10/124	0.000419961	0.0165185	0	0	3.96695	30.8444	PTPRD;TRIO;ERBB4;NTRK3;ROR1;FGFR4;MET;EGFR;FGFR1;PTPRG
58	GO_Biological_Process_2023	Regulation Of Calcium-Mediated Signaling (GO:0050848)	2030-05-01	0.000455833	0.0176203	0	0	8.98161	69.099	SLC24A4;PLCG2;RGN;CDH13;MAPT
59	GO_Biological_Process_2023	Regulation Of Epithelial To Mesenchymal Transition (GO:0010717)	1983-08-01	0.000480452	0.0180527	0	0	4.81111	36.7607	GREM1;COL1A1;DAB2;TNXB;DAG1;PHLDB2;LOXL2;TGFBR2
60	GO_Biological_Process_2023	Positive Regulation Of Kinase Activity (GO:0033674)	9/104	0.000483122	0.0180527	0	0	4.27854	32.6677	ERBB4;NTRK3;ROR1;FGFR4;MET;EGFR;IGF1R;MAP3K5;FGFR1
61	GO_Biological_Process_2023	Negative Regulation Of Cell-Matrix Adhesion (GO:0001953)	2031-05-01	0.000533766	0.0185934	0	0	8.63572	65.0749	JAG1;CASK;THBS1;PHLDB2;MAP4K4
62	GO_Biological_Process_2023	Positive Regulation Of Rho Protein Signal Transduction (GO:0035025)	2031-05-01	0.000533766	0.0185934	0	0	8.63572	65.0749	COL3A1;LPAR1;ARHGEF3;LPAR4;ROBO1
63	GO_Biological_Process_2023	Presynaptic Membrane Assembly (GO:0097105)	2026-08-03	0.000545425	0.0185934	0	0	26.849	201.742	NLGN4Y;PTPRD;NLGN4X
64	GO_Biological_Process_2023	Positive Regulation Of Epithelial To Mesenchymal Transition (GO:0010718)	2047-06-01	0.000548251	0.0185934	0	0	6.58166	49.4202	COL1A1;DAB2;TNXB;JAG1;LOXL2;TGFBR2
65	GO_Biological_Process_2023	Negative Regulation Of Amyloid Precursor Protein Catabolic Process (GO:1902992)	2018-04-01	0.000553472	0.0185934	0	0	12.8087	96.0559	IGF1;APOE;SORL1;PICALM
66	GO_Biological_Process_2023	Positive Regulation Of Cyclin-Dependent Protein Kinase Activity (GO:1904031)	2018-04-01	0.000553472	0.0185934	0	0	12.8087	96.0559	CCND3;CCND2;CCNY;EGFR
67	GO_Biological_Process_2023	Response To Calcium Ion (GO:0051592)	9/106	0.000555646	0.0185934	0	0	4.1899	31.4049	MEF2A;RYR2;CLIC4;CAV1;KCNMA1;PLCG2;THBS1;RYR3;TTN
68	GO_Biological_Process_2023	Integrin-Mediated Signaling Pathway (GO:0007229)	1985-08-01	0.000564285	0.0186048	0	0	4.68567	35.0486	LAMA5;COL3A1;DAB2;DST;FN1;ADAM10;PRKD1;PLPP3
69	GO_Biological_Process_2023	Regulation Of MAPK Cascade (GO:0043408)	13/204	0.000612268	0.0198943	0	0	3.08737	22.8414	BCAR3;EGF;CAV1;LPAR1;FN1;IGF1;EGFR;IGF1R;GREM1;DAG1;PLCG2;MAP4K4;FGFR1
70	GO_Biological_Process_2023	Establishment Of Skin Barrier (GO:0061436)	2019-04-01	0.000688959	0.0220664	0	0	11.9541	87.03	UGCG;MET;TP63;FGFR1
71	GO_Biological_Process_2023	Positive Regulation Of Protein Phosphorylation (GO:0001934)	19/377	0.000742416	0.0234436	0	0	2.42067	17.4424	BCAR3;TNXB;EGF;CAV1;NTRK3;IGF1;EGFR;BMP6;THBS4;TGFBR2;CCND3;DAB2;CCND2;ERBB4;PDGFC;PLCG2;PRKD1;CD44;MAP3K5
72	GO_Biological_Process_2023	Presynaptic Membrane Organization (GO:0097090)	2026-09-03	0.000804803	0.0250607	0	0	22.373	159.406	NLGN4Y;PTPRD;NLGN4X
73	GO_Biological_Process_2023	Cellular Response To Metal Ion (GO:0071248)	10/135	0.000818922	0.025151	0	0	3.61581	25.6995	MEF2A;CLIC4;DLG2;PLCG2;ANK3;FOS;B2M;BMP6;RYR3;EGFR
74	GO_Biological_Process_2023	Positive Regulation Of Protein Transport (GO:0051222)	1970-07-01	0.000864009	0.0261772	0	0	5.00308	35.2914	RUFY3;ANKRD1;FRMD4A;IGF1;SYTL4;BMP6;TTN
75	GO_Biological_Process_2023	Regulation Of Epithelial Cell Proliferation (GO:0050678)	1991-08-01	0.000889	0.0265752	0	0	4.3456	30.5297	CDK6;LAMB1;PRKD1;IGF1;MCC;B2M;EGFR;BMP6
76	GO_Biological_Process_2023	Sprouting Angiogenesis (GO:0002040)	1952-06-01	0.000947803	0.0276272	0	0	5.86476	40.8267	SEMA5A;GREM1;CDH13;THBS1;LOXL2;ROBO1
77	GO_Biological_Process_2023	Regulation Of Axon Extension (GO:0030516)	2035-05-01	0.000948837	0.0276272	0	0	7.48276	52.082	MACF1;RUFY3;APOE;MAPT;L1CAM
78	GO_Biological_Process_2023	Positive Regulation Of Multicellular Organismal Process (GO:0051240)	19/387	0.00101172	0.0290804	0	0	2.35366	16.2311	NCOA1;TNXB;SMURF2;EGF;ZBTB16;CAV1;ESRRG;SORL1;IGF1R;LOXL2;TGFBR2;COL1A1;DAB2;IFI16;PDGFC;GNAS;APOE;PPARGC1A;SOX5
79	GO_Biological_Process_2023	Skin Epidermis Development (GO:0098773)	2021-04-01	0.00102745	0.0291589	0	0	10.5467	72.5682	UGCG;MET;TP63;FGFR1
80	GO_Biological_Process_2023	Regulation Of Rho Protein Signal Transduction (GO:0035023)	1973-07-01	0.00111007	0.0309232	0	0	4.77493	32.4854	COL3A1;ARHGEF3;LPAR1;LPAR4;APOE;MET;ROBO1
81	GO_Biological_Process_2023	Sarcoplasmic Reticulum Calcium Ion Transport (GO:0070296)	2026-10-03	0.001131	0.0309232	0	0	19.1759	130.102	RYR2;RYR3;TRDN
82	GO_Biological_Process_2023	Positive Regulation Of Chondrocyte Differentiation (GO:0032332)	2026-10-03	0.001131	0.0309232	0	0	19.1759	130.102	ZBTB16;LOXL2;SOX5
83	GO_Biological_Process_2023	Positive Regulation Of Epithelial Cell Migration (GO:0010634)	1995-08-01	0.00117842	0.0318315	0	0	4.14496	27.9518	SPARC;EGF;PLCG2;PRKD1;PLPP3;THBS1;SASH1;MAP4K4
84	GO_Biological_Process_2023	Cellular Response To Transforming Growth Factor Beta Stimulus (GO:0071560)	1996-08-01	0.00126137	0.0336666	0	0	4.09764	27.354	COL3A1;COL1A2;USP9Y;ANKRD1;PDE3A;FOS;SOX5;TGFBR2
[truncated: 3,233 more rows]

## Sheet: g.SC2BvSC1
	p_val	avg_log2FC	pct.1	pct.2	p_val_adj
AC096577.1	0	-7.66493	0.004	0.521	0
XIST	2.05e-202	-14.6207	0	0.309	7.51e-198
[truncated: 521 more rows]

## Sheet: h.sc2BvSC1Enrichr
	i	Term	Overlap	P.value	Adjusted.P.value	Old.P.value	Old.Adjusted.P.value	Odds.Ratio	Combined.Score	Genes
[truncated: 83 more rows]

[truncated: 32 more sheets: i.sc2CvSC1, j.sc2CvSC1Enrichr, k. sc3vSC1, l. sc3vSC1Enrichr, m. sc4vSC1, n. sc4vSC1Enrichr, o. Type I DMD v Healthy enr , p. Type II DMD v Healthy enr, q. MEG3hi vs H-Type I, r. MEG3hi vs H-Type I enrichr, s. FB_0 vs FB_5, t. FB_0 vs FB_5 enrichr, u. FB_1 vs FB_5, v. FB_1 vs FB 5 enrichr concat, w. FB_2 vs FB_5, x. FB_2 vs FB_5 enrichr concat, y. FB_3 vs FB_5, z. FB_3 vs FB_5 enrichr concat, aa. FB_6 vs FB_5, ab. FB_6 vs FB_5 enrichr concat …]
