# Supplementary material for: Single nuclei/cell transcriptomics reveal DMD driven cell dynamics and mechanisms of fibroblast inflammatory tissue priming in human dystrophic muscle
Source: Research Square preprint supplement (doi:10.21203/rs.3.rs-4934147/v1), 2026-04-08
Supplement: Supplementary file 2 [file 72369d76c8052ec58a9d519e.xlsx]

## Sheet: Table of Contents
Table of Contents
Sheet	Title	Description
a.	Nuclei counts	Raw numbers and proportions of nuclei belonging to each population.
b.	Major Cell Types	Seurat FindAllMarkers signficant marker genes distinguishing each Major cell type
c.	Satellite cells	Seurat FindAllMarkers signficant marker genes distinguishing each Satellite cell population
d.	Myofibers	Seurat FindAllMarkers signficant marker genes distinguishing each Myofiber population
e.	Fibroblasts	Seurat FindAllMarkers signficant marker genes distinguishing each Fibroblast population
f.	Myeloid	Seurat FindAllMarkers signficant marker genes distinguishing each Myeloid cell population
g.	Lymphoid	Seurat FindAllMarkers signficant marker genes distinguishing each Lymphoid cell population
h.	Lymphoid Antibody Deffintions	Seurat FindAllMarkers signficant marker genes distinguishing each Lymphoid cell population defined by CITEseq surface markers
i.	Brenner RA Reference	Seurat FindAllMarkers signficant marker genes distinguishing each Lymphoid cell population as mapped to Brenner RA reference
j.	Smooth Muscle and Pericytes	Seurat FindAllMarkers signficant marker genes distinguishing each Smooth Muscle cell population
k.	Endethelial	Seurat FindAllMarkers signficant marker genes distinguishing each Endothelial cell population

## Sheet: a. Nuclei counts
Raw numbers of nuclei belonging to each population.
		Subject ID	8100	8102	8108	8109	8110	1023	1622	1668	1272	8009	8011	8200	1230	1576	1600	1612	1624	1675	1676	1679	1682	1683	1684	1685	1687	1690	1692	1694	1695	1696	1699	8020
Major cell population	Subpopulation	Severity Category	Healthy	Healthy	Healthy	Healthy	Healthy	Mild	Mild	Mild	Typical	Mild	Mild	Mild	Typical	Severe	Typical	Typical	Severe	Severe	Typical	Severe	Typical	Severe	Typical	Mild	Typical	Typical	Mild	Severe	Typical	Typical	Severe	Mild
adipocytes	adipocytes		0	2	0	1	6	1	3	2	0	34	0	93	0	3	0	1	2	9	0	3	1	1	5	14	34	22	2	52	5	9	2	42
B cell	B cell		5	2	0	0	0	0	0	10	5	1	3	7	0	3	5	0	11	2	10	6	5	4	0	0	1	0	9	2	2	3	4	0
Endothelial	arterial		114	18	82	143	47	39	8	133	19	25	75	31	29	39	27	48	88	212	109	128	137	45	71	169	22	124	68	16	45	157	292	27
Endothelial	capillary		219	51	428	330	213	107	89	299	170	31	262	70	141	122	80	66	165	497	191	356	45	29	160	424	45	303	62	12	130	303	391	116
Endothelial	lymphatic		2	0	0	10	1	1	0	15	0	9	3	3	0	0	4	9	15	24	6	8	55	3	3	72	25	2	9	0	14	13	16	4
Endothelial	venous		104	30	98	170	63	164	39	237	10	86	103	112	64	62	39	68	131	458	147	221	251	98	184	367	122	462	123	32	56	263	435	17
Fibroblasts	FB_0		14	4	14	4	15	176	228	380	38	74	127	0	59	24	41	156	81	241	146	56	484	254	252	412	185	573	106	45	29	71	97	9
Fibroblasts	FB_1		1	0	1	3	0	349	40	303	0	12	153	0	16	19	17	110	185	760	169	118	26	49	24	154	30	280	127	23	77	443	630	6
Fibroblasts	FB_2		14	1	6	88	22	109	39	103	7	27	71	1	17	22	33	104	142	324	169	77	371	31	102	250	274	590	74	72	25	298	253	4
Fibroblasts	FB_3		7	2	9	8	8	74	107	281	45	40	56	1	73	7	49	98	73	272	60	60	337	188	123	441	96	204	123	20	19	86	51	16
Fibroblasts	FB_4		39	19	14	58	69	6	67	170	16	99	79	2	17	21	34	116	66	566	84	65	93	177	162	189	122	102	35	151	19	99	174	11
Fibroblasts	FB_5		429	100	154	443	333	0	19	8	3	65	73	73	112	272	92	2	1	16	5	0	6	1	3	11	3	2	1	6	81	1	0	68
Fibroblasts	FB_6		1	0	2	0	0	18	3	21	426	5	16	2	5	10	16	30	53	51	51	605	49	65	20	155	77	95	77	9	33	54	243	6
Fibroblasts	FB_8		8	0	0	43	198	42	4	7	0	0	0	1	0	0	4	1	2	8	2	0	23	2	5	3	1	103	0	13	4	13	1	0
Fibroblasts	FB_9		14	0	0	0	1	1	66	6	4	12	9	1	1	5	1	13	7	0	5	129	7	22	3	17	30	30	2	1	0	6	47	0
Mast cells	Mast Cells		7	1	3	7	12	3	2	1	0	11	0	2	3	1	2	1	7	8	8	4	4	1	2	4	9	16	1	3	4	4	2	2
myofibers	Immature		4	7	47	3	47	155	14	117	129	67	74	210	18	61	48	74	249	308	114	618	195	722	132	144	905	681	84	43	191	137	551	124
myofibers	MTJ		14	0	9	1	6	0	0	0	0	0	0	0	0	0	0	1	1	2	0	77	3	17	0	2	5	0	1	0	1	3	14	0
myofibers	Type I		1428	239	1338	2487	851	1653	1614	2402	399	119	306	363	340	238	656	1175	570	1497	556	1321	3814	1233	1503	2344	567	1411	1398	49	162	1805	2067	390
myofibers	D-Type I MEG3hi		0	1	1	4	0	0	0	4	8	2	1	0	5	6	5	26	83	2509	96	26	28	20	77	6	31	63	12	144	769	43	37	18
myofibers	Type II		2806	1080	1094	1496	1996	2386	422	1208	245	228	1660	853	532	276	411	12	328	767	359	146	225	326	417	908	67	721	1195	13	122	354	138	82
myofibers	Indeterminate		1	440	7	6	6	4	9	6	1432	59	14	6	125	3	10	6	2	13	55	751	43	30	83	52	6	16	100	3	48	27	356	50
Pericyte	Pericytes		214	51	237	224	201	21	29	140	57	6	77	21	36	38	18	22	74	179	37	72	28	7	48	199	12	102	40	7	11	79	151	10
Satellite cells	SC_1		137	28	101	222	146	0	1	1	0	2	5	1	3	0	2	0	0	2	0	1	0	1	1	2	0	0	0	1	1	0	0	3
Satellite cells	SC_2A		19	5	4	4	13	45	23	257	134	30	122	25	123	22	35	65	66	195	99	126	98	123	126	416	66	164	161	13	28	74	38	56
Satellite cells	SC_2B		3	1	6	5	9	93	7	307	224	28	435	27	77	104	72	40	62	156	85	59	65	39	128	235	16	233	23	8	20	49	36	124
Satellite cells	SC_2C		0	0	0	1	0	62	0	75	4	2	10	0	8	22	26	64	64	552	57	268	13	24	12	97	14	48	85	7	199	244	546	0
Satellite cells	SC_3		0	0	0	0	0	0	1	21	4	2	4	0	5	10	7	2	6	28	13	20	10	15	4	25	16	19	27	6	44	24	15	29
Satellite cells	SC_4		2	0	4	5	0	25	9	76	12	3	21	1	44	26	15	13	33	112	33	59	37	24	42	82	28	96	20	4	11	72	99	6
Smooth muscle	VSMC1		163	19	49	96	30	0	2	45	0	11	19	9	7	5	8	7	47	57	13	30	60	13	14	113	4	35	70	3	6	70	146	9
Smooth muscle	VSMC2		40	3	14	43	14	12	2	36	3	10	17	7	4	10	8	14	19	93	18	31	64	8	26	66	21	56	45	6	0	63	82	11
Lymphoid	CD8 effector / memory		0	0	1	0	1	0	1	12	0	1	10	2	1	0	1	0	12	5	15	4	0	0	6	14	1	14	2	2	45	115	52	0
Lymphoid	CD4 effector / memory		5	2	4	6	9	3	0	22	6	6	12	8	1	4	5	2	25	3	12	3	1	0	12	12	4	15	4	5	6	20	29	2
Lymphoid	CD4 Tmp / CD8 Tmp		13	3	3	13	17	1	0	25	2	4	8	7	2	4	3	0	10	7	6	2	2	0	13	13	8	12	4	5	6	25	19	4
Lymphoid	NK		4	2	3	7	5	1	0	10	0	12	5	4	3	2	4	0	4	3	1	1	2	1	6	5	2	10	1	0	7	14	1	5
Myeloid	mrc1+		75	18	39	121	89	42	89	327	65	83	145	17	31	164	50	91	164	470	265	51	117	81	136	375	178	418	105	78	149	176	235	28
Myeloid	spp1+		0	0	0	0	0	2	0	2	9	3	1	2	13	6	2	1	10	9	11	5	2	7	5	40	75	10	38	0	21	23	7	10
Myeloid	pparg+		0	0	0	1	0	5	0	8	21	2	2	3	3	7	2	1	17	11	27	16	5	1	5	19	37	37	12	0	5	18	18	3
Myeloid	tamo		11	2	10	7	3	10	7	45	3	15	6	7	5	14	4	4	26	20	12	12	6	12	13	23	16	48	8	7	4	17	21	6
	Total		5917	2131	3782	6060	4431	5610	2944	7122	3500	1226	3984	1972	1923	1632	1836	2443	2901	10446	3046	5535	6712	3674	3928	7874	3155	7117	4254	861	2399	5275	7296	1298
Proportion of total nuclei for each major cell type per Individual
		Subject ID	8100	8102	8108	8109	8110	1023	1622	1668	1272	8009	8011	8200	1230	1576	1600	1612	1624	1675	1676	1679	1682	1683	1684	1685	1687	1690	1692	1694	1695	1696	1699	8020
		Severity Category	Healthy	Healthy	Healthy	Healthy	Healthy	Mild	Mild	Mild	Typical	Mild	Mild	Mild	Typical	Severe	Typical	Typical	Severe	Severe	Typical	Severe	Typical	Severe	Typical	Mild	Typical	Typical	Mild	Severe	Typical	Typical	Severe	Mild
All cells	adipocytes		0	0.000338009	0	0.000169005	0.00101403	0.000169005	0.000507014	0.000338009	0	0.00574616	0	0.0157174	0	0.000507014	0	0.000169005	0.000338009	0.00152104	0	0.000507014	0.000169005	0.000169005	0.000845023	0.00236606	0.00574616	0.0037181	0.000338009	0.00878824	0.000845023	0.00152104	0.000338009	0.00709819
All cells	B cell		0.000845023	0.000338009	0	0	0	0	0	0.00169005	0.000845023	0.000169005	0.000507014	0.00118303	0	0.000507014	0.000845023	0	0.00185905	0.000338009	0.00169005	0.00101403	0.000845023	0.000676018	0	0	0.000169005	0	0.00152104	0.000338009	0.000338009	0.000507014	0.000676018	0
All cells	Mast cells		0.00118303	0.000169005	0.000507014	0.00118303	0.00202805	0.000507014	0.000338009	0.000169005	0	0.00185905	0	0.000338009	0.000507014	0.000169005	0.000338009	0.000169005	0.00118303	0.00135204	0.00135204	0.000676018	0.000676018	0.000169005	0.000338009	0.000676018	0.00152104	0.00270407	0.000169005	0.000507014	0.000676018	0.000676018	0.000338009	0.000338009
All cells	Pericyte		0.036167	0.0239324	0.0626653	0.0369637	0.0453622	0.00374332	0.00985054	0.0196574	0.0162857	0.00489396	0.0193273	0.0106491	0.0187207	0.0232843	0.00980392	0.00900532	0.0255084	0.0171357	0.0121471	0.0130081	0.00417163	0.00190528	0.01222	0.0252731	0.00380349	0.0143319	0.00940291	0.00813008	0.00458524	0.0149763	0.0206963	0.00770416
All cells	Endothelial		0.074193	0.0464571	0.160762	0.107756	0.0731212	0.0554367	0.0461957	0.0960404	0.0568571	0.123165	0.111195	0.109533	0.121685	0.136642	0.0816993	0.0781826	0.137539	0.114015	0.14872	0.128817	0.0727056	0.047632	0.106415	0.131064	0.0678288	0.125193	0.0615891	0.0696864	0.102126	0.139526	0.155428	0.126348
All cells	Fibroblasts		0.0890654	0.0591272	0.0528821	0.106766	0.145791	0.138146	0.194633	0.179584	0.154	0.272431	0.146586	0.0410751	0.156006	0.232843	0.156318	0.25788	0.210272	0.214245	0.226855	0.200542	0.207986	0.214752	0.17668	0.207264	0.259271	0.278067	0.128115	0.39489	0.119633	0.203033	0.205044	0.0924499
All cells	Myofibers		0.717931	0.619427	0.64569	0.658086	0.643873	0.719964	0.691576	0.507442	0.186286	0.284666	0.493725	0.616633	0.456058	0.318627	0.583878	0.49693	0.338504	0.457113	0.331911	0.28365	0.606377	0.434404	0.508401	0.414021	0.212361	0.308416	0.6126	0.239257	0.43935	0.418009	0.309211	0.377504
All cells	Satellite cells		0.0272097	0.015955	0.0304072	0.0391089	0.0379147	0.040107	0.0139266	0.103482	0.108	0.0546493	0.149849	0.0273834	0.135205	0.112745	0.085512	0.0753172	0.0796277	0.100038	0.0942219	0.0962963	0.0332241	0.0615133	0.0796843	0.108839	0.044374	0.0786848	0.074283	0.0452962	0.126303	0.0877725	0.100603	0.167951
All cells	Smooth muscle		0.0343079	0.0103238	0.0166579	0.0229373	0.00993004	0.00213904	0.0013587	0.0113732	0.000857143	0.0171289	0.00903614	0.00811359	0.00572023	0.00919118	0.0087146	0.00859599	0.0227508	0.0143596	0.0101773	0.0110208	0.0184744	0.00571584	0.0101833	0.022733	0.00792393	0.0127863	0.0270334	0.010453	0.00250104	0.0252133	0.03125	0.0154083
All cells	Lymphoid		0.0037181	0.00328484	0.00290851	0.00429043	0.00722185	0.000891266	0.000339674	0.00968829	0.00228571	0.0187602	0.00878514	0.0106491	0.00364015	0.00612745	0.00708061	0.000818666	0.0175801	0.00172315	0.0111622	0.00180668	0.000744934	0.000272183	0.00941955	0.00558801	0.00475436	0.00716594	0.0025858	0.0139373	0.0266778	0.0329858	0.0138432	0.00847458
All cells	Myeloid		0.0145344	0.00938527	0.0129561	0.0212871	0.0207628	0.0105169	0.0326087	0.0536366	0.028	0.0840131	0.0386546	0.0147059	0.0270411	0.117034	0.0315904	0.0397053	0.0748018	0.0488225	0.103414	0.0151762	0.0193683	0.0274905	0.0404786	0.0580391	0.0969889	0.0720809	0.0383169	0.0987224	0.0746144	0.0443602	0.0385143	0.0362096
			Healthy	Healthy	Healthy	Healthy	Healthy	Mild	Mild	Mild	Typical	Mild	Mild	Mild	Typical	Severe	Typical	Typical	Severe	Severe	Typical	Severe	Typical	Severe	Typical	Mild	Typical	Typical	Mild	Severe	Typical	Typical	Severe	Mild
Proportion of each major cell type per subtype per Individual
		Subject ID	8100	8102	8108	8109	8110	1023	1622	1668	1272	8009	8011	8200	1230	1576	1600	1612	1624	1675	1676	1679	1682	1683	1684	1685	1687	1690	1692	1694	1695	1696	1699	8020
		Severity Category	Healthy	Healthy	Healthy	Healthy	Healthy	Mild	Mild	Mild	Typical	Mild	Mild	Mild	Typical	Severe	Typical	Typical	Severe	Severe	Typical	Severe	Typical	Severe	Typical	Mild	Typical	Typical	Mild	Severe	Typical	Typical	Severe	Mild
Endothelial	arterial		0.259681	0.181818	0.134868	0.218989	0.145062	0.125402	0.0588235	0.194444	0.0954774	0.165563	0.1693	0.143519	0.123932	0.174888	0.18	0.251309	0.220551	0.178002	0.240618	0.179523	0.280738	0.257143	0.169856	0.16376	0.102804	0.139169	0.259542	0.266667	0.183673	0.213315	0.257496	0.164634
Endothelial	capillary		0.498861	0.515152	0.703947	0.50536	0.657407	0.344051	0.654412	0.437135	0.854271	0.205298	0.591422	0.324074	0.602564	0.547085	0.533333	0.34555	0.413534	0.417296	0.421634	0.499299	0.0922131	0.165714	0.382775	0.410853	0.21028	0.340067	0.236641	0.2	0.530612	0.411685	0.344797	0.707317
Endothelial	lymphatic		0.00455581	0	0	0.0153139	0.00308642	0.00321543	0	0.0219298	0	0.0596026	0.00677201	0.0138889	0	0	0.0266667	0.0471204	0.037594	0.0201511	0.013245	0.0112202	0.112705	0.0171429	0.00717703	0.0697674	0.116822	0.00224467	0.0343511	0	0.0571429	0.017663	0.0141093	0.0243902
Endothelial	venous		0.236902	0.30303	0.161184	0.260337	0.194444	0.527331	0.286765	0.346491	0.0502513	0.569536	0.232506	0.518519	0.273504	0.278027	0.26	0.356021	0.328321	0.384551	0.324503	0.309958	0.514344	0.56	0.440191	0.35562	0.570093	0.518519	0.469466	0.533333	0.228571	0.357337	0.383598	0.103659
Fibroblasts	FB_0		0.0265655	0.031746	0.07	0.00618238	0.0232198	0.227097	0.397906	0.297107	0.0705009	0.221557	0.217466	0	0.196667	0.0631579	0.142857	0.247619	0.132787	0.107685	0.211288	0.0504505	0.346705	0.321926	0.363112	0.252451	0.226161	0.28954	0.194495	0.132353	0.101045	0.0662932	0.0648396	0.075
Fibroblasts	FB_1		0.00189753	0	0.005	0.00463679	0	0.450323	0.069808	0.236904	0	0.0359281	0.261986	0	0.0533333	0.05	0.0592334	0.174603	0.303279	0.339589	0.244573	0.106306	0.0186246	0.0621039	0.0345821	0.0943627	0.0366748	0.141486	0.233028	0.0676471	0.268293	0.413632	0.421123	0.05
Fibroblasts	FB_2		0.0265655	0.00793651	0.03	0.136012	0.0340557	0.140645	0.0680628	0.0805317	0.012987	0.0808383	0.121575	0.0123457	0.0566667	0.0578947	0.114983	0.165079	0.232787	0.144772	0.244573	0.0693694	0.265759	0.0392902	0.146974	0.153186	0.334963	0.29813	0.13578	0.211765	0.087108	0.278245	0.169118	0.0333333
Fibroblasts	FB_3		0.0132827	0.015873	0.045	0.0123648	0.0123839	0.0954839	0.186736	0.219703	0.0834879	0.11976	0.0958904	0.0123457	0.243333	0.0184211	0.170732	0.155556	0.119672	0.121537	0.0868307	0.0540541	0.241404	0.238276	0.177233	0.270221	0.117359	0.103082	0.225688	0.0588235	0.0662021	0.0802988	0.0340909	0.133333
Fibroblasts	FB_4		0.0740038	0.150794	0.07	0.0896445	0.106811	0.00774194	0.116928	0.132916	0.0296846	0.296407	0.135274	0.0246914	0.0566667	0.0552632	0.118467	0.184127	0.108197	0.252904	0.121563	0.0585586	0.0666189	0.224335	0.233429	0.115809	0.149144	0.0515412	0.0642202	0.444118	0.0662021	0.092437	0.11631	0.0916667
Fibroblasts	FB_5		0.814042	0.793651	0.77	0.684699	0.51548	0	0.0331588	0.00625489	0.00556586	0.194611	0.125	0.901235	0.373333	0.715789	0.320557	0.0031746	0.00163934	0.00714924	0.00723589	0	0.00429799	0.00126743	0.00432277	0.0067402	0.00366748	0.00101061	0.00183486	0.0176471	0.28223	0.000933707	0	0.566667
Fibroblasts	FB_6		0.00189753	0	0.01	0	0	0.0232258	0.0052356	0.0164191	0.790353	0.0149701	0.0273973	0.0246914	0.0166667	0.0263158	0.0557491	0.047619	0.0868852	0.0227882	0.0738061	0.545045	0.0351003	0.0823828	0.0288184	0.0949755	0.094132	0.048004	0.141284	0.0264706	0.114983	0.0504202	0.162433	0.05
Fibroblasts	FB_8		0.0151803	0	0	0.0664606	0.306502	0.0541935	0.0069808	0.00547303	0	0	0	0.0123457	0	0	0.0139373	0.0015873	0.00327869	0.00357462	0.00289436	0	0.0164756	0.00253485	0.00720461	0.00183824	0.00122249	0.0520465	0	0.0382353	0.0139373	0.0121382	0.000668449	0
Fibroblasts	FB_9		0.0265655	0	0	0	0.00154799	0.00129032	0.115183	0.00469116	0.00742115	0.0359281	0.015411	0.0123457	0.00333333	0.0131579	0.00348432	0.0206349	0.0114754	0	0.00723589	0.116216	0.00501433	0.0278834	0.00432277	0.0104167	0.0366748	0.0151592	0.00366972	0.00294118	0	0.00560224	0.0314171	0
myofibers	Immature		0.000940734	0.00527903	0.0188907	0.000752445	0.0162069	0.0369576	0.00682927	0.0313925	0.166882	0.161836	0.0362745	0.147265	0.0202247	0.106087	0.0430493	0.0586371	0.216899	0.119658	0.110787	0.285846	0.0460231	0.314186	0.0643275	0.0423779	0.58614	0.24209	0.0313667	0.409524	0.401261	0.0595911	0.198917	0.208054
myofibers	D-Type I MEG3hi		0	0.00075358	0.000401768	0.00100226	0	0	0	0.0010721	0.0102433	0.00480769	0.000489956	0	0.00558659	0.010327	0.00446429	0.0201863	0.0674249	0.493606	0.0853333	0.011883	0.00656506	0.00862813	0.0361672	0.00176263	0.0196825	0.0219054	0.00446097	0.578313	0.617671	0.0183604	0.0131813	0.029316
myofibers	Indeterminate		0.000235128	0.24901	0.00280449	0.00150113	0.00206469	0.000952835	0.00437105	0.00160557	0.647085	0.124211	0.00681265	0.00418994	0.122549	0.00513699	0.00884956	0.00463679	0.00162206	0.00255102	0.0466102	0.255529	0.00998143	0.0127768	0.0375226	0.0150463	0.00379507	0.0055325	0.0358423	0.0119048	0.037123	0.0113972	0.112551	0.0753012
myofibers	MTJ		0.00329567	0	0.0036855	0.000250752	0.00210305	0	0	0	0	0	0	0	0	0	0	0.000823723	0.00101833	0.000418848	0	0.0490446	0.000737101	0.0106516	0	0.000613497	0.00746269	0	0.00038373	0	0.000948767	0.00136054	0.00620567	0
myofibers	Type I		0.336158	0.181061	0.547912	0.623621	0.298283	0.40926	0.792731	0.664638	0.611963	0.340974	0.155567	0.29852	0.387685	0.457692	0.61194	0.967875	0.580448	0.313508	0.549951	0.841401	0.937101	0.772556	0.752629	0.719018	0.846269	0.642825	0.536454	0.237864	0.1537	0.818594	0.916223	0.795918
myofibers	Type II		0.660546	0.818182	0.447993	0.375125	0.699614	0.59074	0.207269	0.334256	0.375767	0.653295	0.843925	0.70148	0.606613	0.530769	0.383396	0.00988468	0.334012	0.160628	0.355094	0.0929936	0.0552826	0.204261	0.208813	0.278528	0.1	0.328474	0.458557	0.0631068	0.11575	0.160544	0.0611702	0.167347
Satellite cells	SC_1		0.850932	0.823529	0.878261	0.936709	0.869048	0	0.0243902	0.00135685	0	0.0298507	0.00837521	0.0185185	0.0115385	0	0.0127389	0	0	0.00191388	0	0.00187617	0	0.00442478	0.00319489	0.00233372	0	0	0	0.025641	0.00330033	0	0	0.0137615
Satellite cells	SC_2A		0.118012	0.147059	0.0347826	0.0168776	0.077381	0.2	0.560976	0.348711	0.354497	0.447761	0.204355	0.462963	0.473077	0.119565	0.22293	0.353261	0.285714	0.186603	0.344948	0.236398	0.439462	0.544248	0.402556	0.485414	0.471429	0.292857	0.509494	0.333333	0.0924092	0.159827	0.0517711	0.256881
Satellite cells	SC_2B		0.0186335	0.0294118	0.0521739	0.021097	0.0535714	0.413333	0.170732	0.416554	0.592593	0.41791	0.728643	0.5	0.296154	0.565217	0.458599	0.217391	0.268398	0.149282	0.296167	0.110694	0.29148	0.172566	0.408946	0.274212	0.114286	0.416071	0.0727848	0.205128	0.0660066	0.105832	0.0490463	0.568807
Satellite cells	SC_2C		0	0	0	0.00421941	0	0.275556	0	0.101764	0.010582	0.0298507	0.0167504	0	0.0307692	0.119565	0.165605	0.347826	0.277056	0.52823	0.198606	0.502814	0.058296	0.106195	0.0383387	0.113186	0.1	0.0857143	0.268987	0.179487	0.656766	0.526998	0.743869	0
Satellite cells	SC_3		0	0	0	0	0	0	0.0243902	0.0284939	0.010582	0.0298507	0.00670017	0	0.0192308	0.0543478	0.044586	0.0108696	0.025974	0.0267943	0.0452962	0.0375235	0.044843	0.0663717	0.0127796	0.0291715	0.114286	0.0339286	0.085443	0.153846	0.145215	0.0518359	0.020436	0.133028
Satellite cells	SC_4		0.0124224	0	0.0347826	0.021097	0	0.111111	0.219512	0.103121	0.031746	0.0447761	0.0351759	0.0185185	0.169231	0.141304	0.0955414	0.0706522	0.142857	0.107177	0.114983	0.110694	0.165919	0.106195	0.134185	0.0956826	0.2	0.171429	0.0632911	0.102564	0.0363036	0.155508	0.134877	0.0275229
Smooth muscle	VSMC1		0.802956	0.863636	0.777778	0.690647	0.681818	0	0.5	0.555556	0	0.52381	0.527778	0.5625	0.636364	0.333333	0.5	0.333333	0.712121	0.38	0.419355	0.491803	0.483871	0.619048	0.35	0.631285	0.16	0.384615	0.608696	0.333333	1	0.526316	0.640351	0.45
Smooth muscle	VSMC2		0.197044	0.136364	0.222222	0.309353	0.318182	1	0.5	0.444444	1	0.47619	0.472222	0.4375	0.363636	0.666667	0.5	0.666667	0.287879	0.62	0.580645	0.508197	0.516129	0.380952	0.65	0.368715	0.84	0.615385	0.391304	0.666667	0	0.473684	0.359649	0.55
Lymphoid	CD8 effector / memory		0	0	0.0909091	0	0.03125	0	1	0.173913	0	0.0434783	0.285714	0.0952381	0.142857	0	0.0769231	0	0.235294	0.277778	0.441176	0.4	0	0	0.162162	0.318182	0.0666667	0.27451	0.181818	0.166667	0.703125	0.66092	0.514851	0
Lymphoid	CD4 effector / memory		0.227273	0.285714	0.363636	0.230769	0.28125	0.6	0	0.318841	0.75	0.26087	0.342857	0.380952	0.142857	0.4	0.384615	1	0.490196	0.166667	0.352941	0.3	0.2	0	0.324324	0.272727	0.266667	0.294118	0.363636	0.416667	0.09375	0.114943	0.287129	0.181818
Lymphoid	CD4 Tmp / CD8 Tmp		0.590909	0.428571	0.272727	0.5	0.53125	0.2	0	0.362319	0.25	0.173913	0.228571	0.333333	0.285714	0.4	0.230769	0	0.196078	0.388889	0.176471	0.2	0.4	0	0.351351	0.295455	0.533333	0.235294	0.363636	0.416667	0.09375	0.143678	0.188119	0.363636
Lymphoid	NK		0.181818	0.285714	0.272727	0.269231	0.15625	0.2	0	0.144928	0	0.521739	0.142857	0.190476	0.428571	0.2	0.307692	0	0.0784314	0.166667	0.0294118	0.1	0.4	1	0.162162	0.113636	0.133333	0.196078	0.0909091	0	0.109375	0.0804598	0.00990099	0.454545
Myeloid	mrc1		0.872093	0.9	0.795918	0.937984	0.967391	0.711864	0.927083	0.856021	0.663265	0.805825	0.941558	0.586207	0.596154	0.858639	0.862069	0.938144	0.75576	0.921569	0.84127	0.607143	0.9	0.80198	0.855346	0.820569	0.581699	0.814815	0.644172	0.917647	0.832402	0.752137	0.836299	0.595745
Myeloid	spp1		0	0	0	0	0	0.0338983	0	0.0052356	0.0918367	0.0291262	0.00649351	0.0689655	0.25	0.0314136	0.0344828	0.0103093	0.0460829	0.0176471	0.0349206	0.0595238	0.0153846	0.0693069	0.0314465	0.0875274	0.245098	0.0194932	0.233129	0	0.117318	0.0982906	0.024911	0.212766
Myeloid	pparg		0	0	0	0.00775194	0	0.0847458	0	0.0209424	0.214286	0.0194175	0.012987	0.103448	0.0576923	0.0366492	0.0344828	0.0103093	0.078341	0.0215686	0.0857143	0.190476	0.0384615	0.00990099	0.0314465	0.0415755	0.120915	0.0721248	0.0736196	0	0.027933	0.0769231	0.0640569	0.0638298
Myeloid	tamo		0.127907	0.1	0.204082	0.0542636	0.0326087	0.169492	0.0729167	0.117801	0.0306122	0.145631	0.038961	0.241379	0.0961538	0.0732984	0.0689655	0.0412371	0.119816	0.0392157	0.0380952	0.142857	0.0461538	0.118812	0.081761	0.0503282	0.0522876	0.0935673	0.0490798	0.0823529	0.0223464	0.0726496	0.0747331	0.12766

## Sheet: b. Major Cell Types
Seurat FindAllMarkers signficant marker genes distinguishing each Major cell type
	p_val	avg_log2FC	% of population	% of all other Cell types	p_val_adj	Population	gene
ARHGAP15	0	4.83941	0.755	0.054	0	Lymphoid	ARHGAP15
PTPRC	0	5.90467	0.708	0.024	0	Lymphoid	PTPRC
SKAP1	0	9.33518	0.65	0.003	0	Lymphoid	SKAP1
DMD	0	-4.17048	0.103	0.685	0	Lymphoid	DMD
MEF2C	0	-4.02939	0.057	0.61	0	Lymphoid	MEF2C
NEAT1	0	-2.36346	0.395	0.856	0	Lymphoid	NEAT1
ANKRD44	0	4.16122	0.517	0.058	0	Lymphoid	ANKRD44
AC079793.1	0	4.30441	0.467	0.037	0	Lymphoid	AC079793.1
IKZF1	0	6.09393	0.411	0.01	0	Lymphoid	IKZF1
RIPOR2	0	3.81245	0.499	0.106	0	Lymphoid	RIPOR2
TOX	0	6.76096	0.399	0.008	0	Lymphoid	TOX
B2M	0	3.3554	0.497	0.107	0	Lymphoid	B2M
THEMIS	0	10.4153	0.38	0.001	0	Lymphoid	THEMIS
FYB1	0	4.93875	0.386	0.019	0	Lymphoid	FYB1
LINC01934	0	8.74264	0.359	0.003	0	Lymphoid	LINC01934
HLA-B	0	3.43986	0.419	0.071	0	Lymphoid	HLA-B
ITGA4	0	6.88157	0.348	0.005	0	Lymphoid	ITGA4
SAMD3	0	6.69152	0.344	0.006	0	Lymphoid	SAMD3
PARP8	0	4.16301	0.373	0.037	0	Lymphoid	PARP8
PRKCH	0	2.80168	0.434	0.102	0	Lymphoid	PRKCH
CHST11	0	3.86642	0.371	0.04	0	Lymphoid	CHST11
DOCK8	0	3.47484	0.373	0.053	0	Lymphoid	DOCK8
CD247	0	7.55378	0.324	0.005	0	Lymphoid	CD247
DOCK10	0	3.2045	0.397	0.08	0	Lymphoid	DOCK10
IQGAP2	0	3.53298	0.341	0.031	0	Lymphoid	IQGAP2
DOCK2	0	4.09542	0.32	0.022	0	Lymphoid	DOCK2
BCL11B	0	10.3838	0.298	0	0	Lymphoid	BCL11B
FYN	0	2.75438	0.397	0.101	0	Lymphoid	FYN
PIP4K2A	0	3.47757	0.352	0.057	0	Lymphoid	PIP4K2A
APBB1IP	0	4.55813	0.311	0.022	0	Lymphoid	APBB1IP
PCED1B	0	3.64275	0.328	0.04	0	Lymphoid	PCED1B
PRKCB	0	5.1836	0.292	0.012	0	Lymphoid	PRKCB
CD96	0	6.60673	0.285	0.006	0	Lymphoid	CD96
HLA-A	0	3.07224	0.36	0.085	0	Lymphoid	HLA-A
TC2N	0	4.51061	0.298	0.023	0	Lymphoid	TC2N
AOAH	0	3.88468	0.294	0.026	0	Lymphoid	AOAH
STAT4	0	5.4451	0.276	0.009	0	Lymphoid	STAT4
SLFN12L	0	6.74429	0.271	0.005	0	Lymphoid	SLFN12L
CD2	0	9.94391	0.251	0	0	Lymphoid	CD2
CDC42SE2	0	3.1923	0.323	0.072	0	Lymphoid	CDC42SE2
LCP2	0	4.96086	0.26	0.012	0	Lymphoid	LCP2
TNFAIP8	0	4.49745	0.267	0.02	0	Lymphoid	TNFAIP8
CARD11	0	7.63905	0.241	0.002	0	Lymphoid	CARD11
CLEC2D	0	3.61236	0.286	0.047	0	Lymphoid	CLEC2D
GRAP2	0	8.53638	0.24	0.001	0	Lymphoid	GRAP2
HLA-C	0	3.38355	0.287	0.05	0	Lymphoid	HLA-C
ETS1	0	3.06284	0.278	0.052	0	Lymphoid	ETS1
ITK	0	8.89339	0.227	0.001	0	Lymphoid	ITK
CAMK4	0	6.87548	0.226	0.004	0	Lymphoid	CAMK4
CCND3	0	3.4417	0.255	0.038	0	Lymphoid	CCND3
STK4	0	3.35231	0.261	0.045	0	Lymphoid	STK4
ARAP2	0	4.72232	0.228	0.013	0	Lymphoid	ARAP2
MYO1F	0	4.16449	0.234	0.02	0	Lymphoid	MYO1F
GNG2	0	3.45035	0.249	0.036	0	Lymphoid	GNG2
LINC02694	0	6.46984	0.221	0.008	0	Lymphoid	LINC02694
PPP2R2B	0	5.84443	0.218	0.006	0	Lymphoid	PPP2R2B
LINC00861	0	7.97422	0.213	0.002	0	Lymphoid	LINC00861
PYHIN1	0	7.84053	0.206	0.002	0	Lymphoid	PYHIN1
ITGAL	0	6.1638	0.21	0.006	0	Lymphoid	ITGAL
IKZF3	0	7.818	0.203	0.002	0	Lymphoid	IKZF3
AC016074.2	0	7.63995	0.202	0.002	0	Lymphoid	AC016074.2
STK10	0	3.75501	0.215	0.024	0	Lymphoid	STK10
CD53	0	5.46366	0.197	0.007	0	Lymphoid	CD53
LCP1	0	5.67137	0.191	0.005	0	Lymphoid	LCP1
ARHGAP25	0	4.55149	0.198	0.013	0	Lymphoid	ARHGAP25
KLRK1	0	7.00416	0.188	0.003	0	Lymphoid	KLRK1
NLRC5	0	3.67331	0.21	0.026	0	Lymphoid	NLRC5
STK17B	0	3.78514	0.2	0.022	0	Lymphoid	STK17B
GZMA	0	9.70872	0.179	0.001	0	Lymphoid	GZMA
RASGRP1	0	4.62584	0.195	0.017	0	Lymphoid	RASGRP1
TRAF3IP3	0	6.1825	0.182	0.005	0	Lymphoid	TRAF3IP3
PTPN22	0	6.32985	0.174	0.004	0	Lymphoid	PTPN22
TMC8	0	6.54312	0.169	0.003	0	Lymphoid	TMC8
PIK3R5	0	4.06556	0.18	0.014	0	Lymphoid	PIK3R5
INPP5D	0	3.47539	0.188	0.023	0	Lymphoid	INPP5D
CYFIP2	0	5.4582	0.172	0.009	0	Lymphoid	CYFIP2
CCL5	0	8.32179	0.163	0.001	0	Lymphoid	CCL5
EMB	0	4.14761	0.174	0.013	0	Lymphoid	EMB
AKNA	0	4.58452	0.172	0.011	0	Lymphoid	AKNA
CCDC88C	0	4.36675	0.175	0.014	0	Lymphoid	CCDC88C
AC013652.1	0	4.98822	0.178	0.017	0	Lymphoid	AC013652.1
ZNF831	0	8.28521	0.161	0.001	0	Lymphoid	ZNF831
MCTP2	0	4.65668	0.172	0.012	0	Lymphoid	MCTP2
RHOH	0	8.0076	0.16	0.001	0	Lymphoid	RHOH
TRG-AS1	0	6.87612	0.161	0.002	0	Lymphoid	TRG-AS1
CPB2-AS1	0	4.76385	0.169	0.012	0	Lymphoid	CPB2-AS1
ST8SIA4	0	3.42221	0.172	0.02	0	Lymphoid	ST8SIA4
CYBA	0	3.93479	0.17	0.02	0	Lymphoid	CYBA
LCK	0	8.27633	0.146	0.001	0	Lymphoid	LCK
SCML4	0	9.04436	0.146	0.001	0	Lymphoid	SCML4
GPRIN3	0	4.13532	0.153	0.012	0	Lymphoid	GPRIN3
ITGB2	0	4.98269	0.146	0.007	0	Lymphoid	ITGB2
DTHD1	0	6.13689	0.138	0.002	0	Lymphoid	DTHD1
ACAP1	0	5.08882	0.145	0.009	0	Lymphoid	ACAP1
JAKMIP2	0	6.76213	0.137	0.002	0	Lymphoid	JAKMIP2
AC092652.1	0	4.78144	0.14	0.007	0	Lymphoid	AC092652.1
AC010609.1	0	9.79512	0.132	0	0	Lymphoid	AC010609.1
NKG7	0	9.146	0.131	0.001	0	Lymphoid	NKG7
SEPTIN6	0	4.05215	0.143	0.014	0	Lymphoid	SEPTIN6
BIN2	0	5.9275	0.13	0.003	0	Lymphoid	BIN2
SAMSN1	0	4.43614	0.132	0.008	0	Lymphoid	SAMSN1
SIDT1	0	4.3458	0.136	0.013	0	Lymphoid	SIDT1
IL7R	0	9.0441	0.12	0.001	0	Lymphoid	IL7R
PTPN7	0	5.47766	0.123	0.005	0	Lymphoid	PTPN7
PDE3B	0	4.25022	0.128	0.011	0	Lymphoid	PDE3B
RUNX3	0	6.8482	0.111	0.001	0	Lymphoid	RUNX3
SPOCK2	0	6.61996	0.111	0.002	0	Lymphoid	SPOCK2
GPR174	0	9.35076	0.109	0	0	Lymphoid	GPR174
CD3G	0	8.45548	0.109	0.001	0	Lymphoid	CD3G
PIK3CD	0	4.3218	0.116	0.009	0	Lymphoid	PIK3CD
CORO1A	0	6.59429	0.108	0.002	0	Lymphoid	CORO1A
INSYN2B	0	4.57443	0.111	0.006	0	Lymphoid	INSYN2B
ARL4C	0	6.01526	0.103	0.003	0	Lymphoid	ARL4C
CD6	0	8.15733	0.1	0.001	0	Lymphoid	CD6
TMC6	0	4.32623	0.106	0.007	0	Lymphoid	TMC6
BICDL1	0	6.88638	0.099	0.001	0	Lymphoid	BICDL1
APOBEC3G	0	5.92462	0.099	0.002	0	Lymphoid	APOBEC3G
SP140	0	5.1427	0.101	0.005	0	Lymphoid	SP140
SKAP1-AS1	0	8.37192	0.097	0.001	0	Lymphoid	SKAP1-AS1
RAB27B	0	7.42108	0.097	0.001	0	Lymphoid	RAB27B
FGD3	0	4.61501	0.099	0.006	0	Lymphoid	FGD3
SLAMF6	0	7.90311	0.093	0.001	0	Lymphoid	SLAMF6
AC006369.1	0	5.49907	0.096	0.004	0	Lymphoid	AC006369.1
TRAF1	0	5.15955	0.096	0.005	0	Lymphoid	TRAF1
CD3E	0	9.29383	0.091	0	0	Lymphoid	CD3E
MYBL1	0	6.16711	0.093	0.003	0	Lymphoid	MYBL1
PRF1	0	9.89851	0.09	0	0	Lymphoid	PRF1
LAPTM5	0	4.32473	0.095	0.006	0	Lymphoid	LAPTM5
CTSW	0	9.11388	0.089	0	0	Lymphoid	CTSW
AL137856.1	0	6.09357	0.089	0.002	0	Lymphoid	AL137856.1
LEF1	0	7.09997	0.089	0.002	0	Lymphoid	LEF1
TRBC2	0	9.13963	0.085	0	0	Lymphoid	TRBC2
AC022075.1	0	5.57106	0.088	0.003	0	Lymphoid	AC022075.1
CD3D	0	9.30044	0.084	0	0	Lymphoid	CD3D
IL2RG	0	8.22743	0.083	0	0	Lymphoid	IL2RG
GNLY	0	7.55688	0.084	0.002	0	Lymphoid	GNLY
SLA	0	4.77735	0.083	0.004	0	Lymphoid	SLA
TESPA1	0	5.66534	0.081	0.002	0	Lymphoid	TESPA1
PTGDR	0	4.90334	0.083	0.004	0	Lymphoid	PTGDR
CPA3	0	8.4661	0.078	0.001	0	Lymphoid	CPA3
UBASH3A	0	9.95356	0.077	0	0	Lymphoid	UBASH3A
TRAC	0	9.21952	0.076	0	0	Lymphoid	TRAC
CD48	0	6.87453	0.075	0.001	0	Lymphoid	CD48
PCED1B-AS1	0	6.0578	0.076	0.002	0	Lymphoid	PCED1B-AS1
HCST	0	6.42354	0.076	0.002	0	Lymphoid	HCST
AC104078.2	0	8.76891	0.073	0	0	Lymphoid	AC104078.2
TAGAP	0	5.67853	0.075	0.002	0	Lymphoid	TAGAP
LINC00299	0	5.94435	0.075	0.003	0	Lymphoid	LINC00299
CD37	0	5.10724	0.075	0.004	0	Lymphoid	CD37
SLAMF1	0	8.36149	0.07	0	0	Lymphoid	SLAMF1
OPRM1	0	5.48736	0.073	0.003	0	Lymphoid	OPRM1
MYO1G	0	6.75409	0.071	0.001	0	Lymphoid	MYO1G
GZMH	0	9.69988	0.069	0	0	Lymphoid	GZMH
CYTIP	0	5.39537	0.071	0.002	0	Lymphoid	CYTIP
LY9	0	7.51682	0.068	0	0	Lymphoid	LY9
CD69	0	8.62663	0.068	0	0	Lymphoid	CD69
KIT	0	6.05848	0.069	0.002	0	Lymphoid	KIT
IL18R1	0	5.16051	0.071	0.004	0	Lymphoid	IL18R1
GZMK	0	8.67651	0.065	0	0	Lymphoid	GZMK
RASAL3	0	5.92138	0.067	0.002	0	Lymphoid	RASAL3
SLAMF7	0	6.97047	0.065	0.001	0	Lymphoid	SLAMF7
KLRB1	0	7.45461	0.065	0.001	0	Lymphoid	KLRB1
ADGRG5	0	7.04952	0.064	0.001	0	Lymphoid	ADGRG5
GATA3	0	5.48168	0.064	0.002	0	Lymphoid	GATA3
AC092979.1	0	7.2906	0.062	0.001	0	Lymphoid	AC092979.1
TRBC1	0	8.43116	0.061	0	0	Lymphoid	TRBC1
CD8A	0	8.7855	0.06	0	0	Lymphoid	CD8A
RAC2	0	7.20605	0.06	0.001	0	Lymphoid	RAC2
KLRC2	0	8.8437	0.058	0	0	Lymphoid	KLRC2
AC116348.3	0	6.52724	0.059	0.001	0	Lymphoid	AC116348.3
CD52	0	7.95971	0.057	0	0	Lymphoid	CD52
SYTL1	0	5.80683	0.058	0.001	0	Lymphoid	SYTL1
SPN	0	6.0936	0.058	0.001	0	Lymphoid	SPN
IL2RB	0	8.37029	0.057	0	0	Lymphoid	IL2RB
ALOX5AP	0	5.26397	0.057	0.002	0	Lymphoid	ALOX5AP
AC243829.2	0	8.74573	0.055	0	0	Lymphoid	AC243829.2
AC004687.1	0	6.22765	0.056	0.001	0	Lymphoid	AC004687.1
SASH3	0	6.14618	0.055	0.001	0	Lymphoid	SASH3
GBP5	0	6.74151	0.053	0.001	0	Lymphoid	GBP5
TMEM156	0	5.98739	0.053	0.001	0	Lymphoid	TMEM156
TRGC2	0	9.61104	0.052	0	0	Lymphoid	TRGC2
TBC1D10C	0	7.04042	0.053	0.001	0	Lymphoid	TBC1D10C
MCOLN2	0	5.49507	0.053	0.002	0	Lymphoid	MCOLN2
FCMR	0	7.15233	0.051	0.001	0	Lymphoid	FCMR
BATF	0	6.7807	0.05	0.001	0	Lymphoid	BATF
THRA1/BTR	0	10.2606	0.049	0	0	Lymphoid	THRA1/BTR
ZBP1	0	6.99334	0.05	0.001	0	Lymphoid	ZBP1
LINC02725	0	5.80397	0.049	0.001	0	Lymphoid	LINC02725
ITGB2-AS1	0	6.59925	0.049	0.001	0	Lymphoid	ITGB2-AS1
AL157402.2	0	5.91473	0.048	0.001	0	Lymphoid	AL157402.2
AC093010.2	0	7.77552	0.046	0	0	Lymphoid	AC093010.2
ITGB7	0	7.2713	0.047	0.001	0	Lymphoid	ITGB7
MS4A2	0	7.63334	0.046	0.001	0	Lymphoid	MS4A2
DENND1C	0	6.29882	0.046	0.001	0	Lymphoid	DENND1C
LTB	0	7.59132	0.044	0	0	Lymphoid	LTB
CD7	0	8.46479	0.044	0	0	Lymphoid	CD7
FCRL6	0	7.81523	0.043	0	0	Lymphoid	FCRL6
ICOS	0	10.3123	0.043	0	0	Lymphoid	ICOS
AC067945.4	0	6.03696	0.043	0.001	0	Lymphoid	AC067945.4
HDC	0	8.81159	0.041	0	0	Lymphoid	HDC
GZMM	0	8.33199	0.041	0	0	Lymphoid	GZMM
TSPAN32	0	6.02788	0.041	0.001	0	Lymphoid	TSPAN32
GZMB	0	8.90535	0.04	0	0	Lymphoid	GZMB
AC015849.1	0	6.81438	0.041	0.001	0	Lymphoid	AC015849.1
LINC00426	0	6.80222	0.04	0.001	0	Lymphoid	LINC00426
CST7	0	8.01996	0.039	0	0	Lymphoid	CST7
CD8B	0	7.60435	0.037	0	0	Lymphoid	CD8B
KLRC3	0	8.71861	0.037	0	0	Lymphoid	KLRC3
CEACAM21	0	6.62904	0.037	0.001	0	Lymphoid	CEACAM21
TPSB2	0	8.07172	0.035	0	0	Lymphoid	TPSB2
AL683807.1	0	6.64969	0.036	0.001	0	Lymphoid	AL683807.1
LINC01871	0	9.85714	0.034	0	0	Lymphoid	LINC01871
TRAT1	0	9.08182	0.034	0	0	Lymphoid	TRAT1
TNIP3	0	8.07505	0.034	0	0	Lymphoid	TNIP3
KLRC4	0	6.01622	0.034	0.001	0	Lymphoid	KLRC4
LAX1	0	6.89062	0.032	0	0	Lymphoid	LAX1
KLRC1	0	8.24563	0.032	0	0	Lymphoid	KLRC1
MATK	0	6.2914	0.033	0.001	0	Lymphoid	MATK
CXCR3	0	8.45415	0.032	0	0	Lymphoid	CXCR3
CD244	0	6.94911	0.03	0	0	Lymphoid	CD244
LINC02312	0	9.89461	0.029	0	0	Lymphoid	LINC02312
CCL4	0	7.82181	0.029	0	0	Lymphoid	CCL4
CCR7	0	7.20775	0.029	0	0	Lymphoid	CCR7
SIRPG	0	7.99479	0.028	0	0	Lymphoid	SIRPG
SIGLEC6	0	8.27077	0.027	0	0	Lymphoid	SIGLEC6
AC010275.1	0	7.23943	0.026	0	0	Lymphoid	AC010275.1
TPSAB1	0	8.72702	0.026	0	0	Lymphoid	TPSAB1
CD40LG	0	7.5307	0.026	0	0	Lymphoid	CD40LG
FASLG	0	10.9231	0.025	0	0	Lymphoid	FASLG
EOMES	0	9.61218	0.025	0	0	Lymphoid	EOMES
TBX21	0	8.98303	0.025	0	0	Lymphoid	TBX21
LINC01891	0	8.3667	0.024	0	0	Lymphoid	LINC01891
PDCD1	0	8.53441	0.024	0	0	Lymphoid	PDCD1
LINC02325	0	7.76137	0.024	0	0	Lymphoid	LINC02325
C16orf54	0	6.74796	0.024	0	0	Lymphoid	C16orf54
P2RY10	0	7.081	0.023	0	0	Lymphoid	P2RY10
FGFBP2	0	7.5523	0.021	0	0	Lymphoid	FGFBP2
GFI1	0	7.65719	0.02	0	0	Lymphoid	GFI1
IL1RL1	0	6.88674	0.02	0	0	Lymphoid	IL1RL1
IL18RAP	0	8.67573	0.02	0	0	Lymphoid	IL18RAP
LINC02520	0	8.30332	0.015	0	0	Lymphoid	LINC02520
TRGC1	0	9.78461	0.015	0	0	Lymphoid	TRGC1
TRDC	0	9.58966	0.014	0	0	Lymphoid	TRDC
Z82206.1	0	10.8336	0.013	0	0	Lymphoid	Z82206.1
TRGV10	0	14.8633	0.011	0	0	Lymphoid	TRGV10
ANO9	1.66438e-305	6.39426	0.032	0.001	6.09181e-301	Lymphoid	ANO9
ICAM3	2.25103e-295	6.04257	0.036	0.001	8.23901e-291	Lymphoid	ICAM3
P2RY8	1.04494e-294	4.47573	0.087	0.006	3.82458e-290	Lymphoid	P2RY8
ATP2A3	1.91442e-293	4.47075	0.078	0.005	7.00695e-289	Lymphoid	ATP2A3
DENND2D	5.07054e-293	5.59904	0.048	0.002	1.85587e-288	Lymphoid	DENND2D
NLRC3	2.33307e-292	4.81932	0.09	0.007	8.53928e-288	Lymphoid	NLRC3
VAV1	4.87169e-290	4.10154	0.095	0.007	1.78309e-285	Lymphoid	VAV1
RBMS3	3.20778e-289	-4.07321	0.036	0.572	1.17408e-284	Lymphoid	RBMS3
CCR5	1.94106e-286	6.73881	0.023	0	7.10447e-282	Lymphoid	CCR5
SIT1	4.38564e-282	7.96064	0.014	0	1.60519e-277	Lymphoid	SIT1
NEB	5.13018e-282	-3.83084	0.203	0.647	1.8777e-277	Lymphoid	NEB
TTC39C	3.02289e-281	3.91237	0.154	0.02	1.10641e-276	Lymphoid	TTC39C
C11orf21	1.26708e-278	6.64182	0.02	0	4.63763e-274	Lymphoid	C11orf21
AC092652.2	2.07909e-278	4.66854	0.074	0.005	7.60967e-274	Lymphoid	AC092652.2
TRDN	2.45977e-278	-4.18074	0.085	0.575	9.00301e-274	Lymphoid	TRDN
AC099063.1	5.62353e-273	6.9776	0.02	0	2.05827e-268	Lymphoid	AC099063.1
ARHGAP30	1.24205e-267	4.47886	0.078	0.005	4.54604e-263	Lymphoid	ARHGAP30
ZNF683	9.58749e-267	8.82606	0.012	0	3.50912e-262	Lymphoid	ZNF683
DST	2.86792e-266	-3.44425	0.046	0.562	1.04969e-261	Lymphoid	DST
NEDD9	1.46962e-265	3.15929	0.194	0.031	5.37894e-261	Lymphoid	NEDD9
CASP8	5.75191e-265	4.01717	0.119	0.013	2.10525e-260	Lymphoid	CASP8
XCL1	4.38924e-264	8.77713	0.013	0	1.60651e-259	Lymphoid	XCL1
LIMD2	2.10743e-262	4.82445	0.062	0.003	7.71339e-258	Lymphoid	LIMD2
PTPRJ	2.79759e-262	3.19404	0.182	0.028	1.02395e-257	Lymphoid	PTPRJ
MYBPC1	1.12025e-261	-3.9762	0.14	0.591	4.10021e-257	Lymphoid	MYBPC1
SVIL	2.69299e-261	-3.24445	0.088	0.583	9.85661e-257	Lymphoid	SVIL
KCNAB2	5.54469e-260	3.92675	0.1	0.009	2.02941e-255	Lymphoid	KCNAB2
SORL1	3.4569e-258	4.10228	0.102	0.009	1.26526e-253	Lymphoid	SORL1
ARHGDIB	4.61552e-258	3.98377	0.095	0.008	1.68933e-253	Lymphoid	ARHGDIB
ARHGAP45	6.77289e-258	4.65616	0.059	0.003	2.47895e-253	Lymphoid	ARHGAP45
TXK	1.86377e-256	4.68937	0.128	0.015	6.8216e-252	Lymphoid	TXK
FCRL3	7.29003e-256	7.71264	0.014	0	2.66822e-251	Lymphoid	FCRL3
TTN-AS1	8.15486e-256	-4.4342	0.071	0.545	2.98476e-251	Lymphoid	TTN-AS1
CD226	1.29949e-255	4.24164	0.125	0.014	4.75625e-251	Lymphoid	CD226
CARMIL2	1.39861e-251	7.39551	0.017	0	5.11905e-247	Lymphoid	CARMIL2
ZAP70	4.1174e-251	4.7917	0.055	0.003	1.50701e-246	Lymphoid	ZAP70
CD27	1.06792e-249	6.51191	0.029	0.001	3.90868e-245	Lymphoid	CD27
FILIP1L	4.4308e-249	-3.28048	0.121	0.591	1.62172e-244	Lymphoid	FILIP1L
CACNA2D1	7.97991e-248	-4.02218	0.043	0.527	2.92073e-243	Lymphoid	CACNA2D1
PSTPIP1	1.25003e-246	4.83419	0.055	0.003	4.57522e-242	Lymphoid	PSTPIP1
TTN	6.38974e-246	-3.44126	0.371	0.703	2.33871e-241	Lymphoid	TTN
KIAA1217	7.39666e-244	-4.22105	0.028	0.507	2.70725e-239	Lymphoid	KIAA1217
PITPNC1	2.65578e-243	2.30023	0.345	0.094	9.72042e-239	Lymphoid	PITPNC1
SIDT1-AS1	7.19998e-241	7.33355	0.014	0	2.63526e-236	Lymphoid	SIDT1-AS1
PSD4	1.43752e-240	5.19613	0.042	0.002	5.26147e-236	Lymphoid	PSD4
SH3KBP1	4.70719e-240	2.87654	0.262	0.059	1.72288e-235	Lymphoid	SH3KBP1
RABGAP1L	3.39605e-237	2.45094	0.519	0.227	1.24299e-232	Lymphoid	RABGAP1L
EMC10	1.47456e-236	-3.95713	0.076	0.532	5.39704e-232	Lymphoid	EMC10
CDH13	3.04017e-236	-4.19555	0.035	0.504	1.11273e-231	Lymphoid	CDH13
PRKG1	9.231e-236	-4.14062	0.029	0.499	3.37864e-231	Lymphoid	PRKG1
PALLD	1.26891e-235	-3.48127	0.078	0.547	4.64433e-231	Lymphoid	PALLD
COTL1	4.38519e-235	4.35545	0.071	0.005	1.60502e-230	Lymphoid	COTL1
SGCD	1.14452e-232	-4.05134	0.031	0.498	4.18906e-228	Lymphoid	SGCD
CTNNA3	4.15471e-232	-4.52827	0.032	0.491	1.52066e-227	Lymphoid	CTNNA3
MIAT	4.75433e-232	5.30277	0.042	0.002	1.74013e-227	Lymphoid	MIAT
SLC14A1	4.26343e-230	4.57512	0.056	0.003	1.56046e-225	Lymphoid	SLC14A1
LY75	1.38461e-229	4.37402	0.064	0.004	5.06782e-225	Lymphoid	LY75
CTSG	1.61659e-227	7.64153	0.014	0	5.91689e-223	Lymphoid	CTSG
SELPLG	2.18184e-227	5.37015	0.039	0.002	7.98573e-223	Lymphoid	SELPLG
EML4	2.65385e-227	2.86062	0.285	0.072	9.71335e-223	Lymphoid	EML4
MLIP	1.18248e-226	-4.00906	0.029	0.486	4.32801e-222	Lymphoid	MLIP
CMYA5	3.70112e-226	-3.82097	0.053	0.506	1.35465e-221	Lymphoid	CMYA5
DEF6	9.30904e-226	4.67993	0.062	0.004	3.4072e-221	Lymphoid	DEF6
CCR2	1.22473e-222	6.5085	0.02	0	4.48263e-218	Lymphoid	CCR2
CRTAM	8.47411e-221	5.49073	0.028	0.001	3.10161e-216	Lymphoid	CRTAM
ZFPM2	5.56348e-220	-4.29142	0.023	0.473	2.03629e-215	Lymphoid	ZFPM2
SEL1L3	9.34991e-219	3.42952	0.128	0.017	3.42216e-214	Lymphoid	SEL1L3
PDLIM5	6.63803e-217	-3.21377	0.085	0.53	2.42959e-212	Lymphoid	PDLIM5
DTNA	2.25964e-216	-3.88558	0.031	0.477	8.27049e-212	Lymphoid	DTNA
PDE4D	2.0549e-215	-3.14101	0.09	0.541	7.52114e-211	Lymphoid	PDE4D
PLAC8	3.4662e-215	4.31191	0.06	0.004	1.26866e-210	Lymphoid	PLAC8
ADGRE5	5.50319e-215	3.51805	0.171	0.03	2.01422e-210	Lymphoid	ADGRE5
ZC3HAV1	7.27346e-214	3.20701	0.179	0.032	2.66216e-209	Lymphoid	ZC3HAV1
AL365361.1	1.59919e-213	7.65588	0.013	0	5.85319e-209	Lymphoid	AL365361.1
TMEM154	2.54356e-213	4.31309	0.064	0.005	9.30968e-209	Lymphoid	TMEM154
MIR99AHG	1.42903e-210	-3.20266	0.047	0.495	5.23038e-206	Lymphoid	MIR99AHG
QKI	1.58777e-210	-2.81526	0.072	0.525	5.81141e-206	Lymphoid	QKI
AL355581.1	3.77518e-209	5.83884	0.029	0.001	1.38175e-204	Lymphoid	AL355581.1
EMP3	6.43579e-208	3.58736	0.113	0.014	2.35556e-203	Lymphoid	EMP3
OASL	6.51921e-208	6.0255	0.022	0	2.3861e-203	Lymphoid	OASL
AC243960.1	9.54701e-208	6.26713	0.02	0	3.4943e-203	Lymphoid	AC243960.1
NCR3	2.21482e-207	8.01441	0.011	0	8.10646e-203	Lymphoid	NCR3
AC009133.3	6.96337e-207	7.53726	0.013	0	2.54866e-202	Lymphoid	AC009133.3
MYOM1	3.38273e-206	-3.78831	0.041	0.473	1.23811e-201	Lymphoid	MYOM1
P2RX1	9.63446e-206	5.15512	0.032	0.001	3.52631e-201	Lymphoid	P2RX1
SLC9A3R1	7.69387e-205	4.50306	0.058	0.004	2.81603e-200	Lymphoid	SLC9A3R1
AC114760.2	7.98235e-205	3.7566	0.107	0.013	2.92162e-200	Lymphoid	AC114760.2
MT-ATP6	2.04282e-203	2.35905	0.636	0.366	7.47692e-199	Lymphoid	MT-ATP6
CKLF	2.39133e-201	3.49058	0.115	0.015	8.7525e-197	Lymphoid	CKLF
LIMCH1	2.56715e-201	-3.58872	0.034	0.463	9.39602e-197	Lymphoid	LIMCH1
CD44	1.14595e-200	2.27202	0.362	0.119	4.1943e-196	Lymphoid	CD44
HLA-E	5.27612e-200	2.64884	0.218	0.048	1.93111e-195	Lymphoid	HLA-E
LAG3	1.23201e-199	5.8408	0.022	0.001	4.50927e-195	Lymphoid	LAG3
RBFOX2	2.1602e-199	-3.66579	0.036	0.463	7.90654e-195	Lymphoid	RBFOX2
RBFOX1	2.5936e-199	-4.43648	0.022	0.442	9.49284e-195	Lymphoid	RBFOX1
PDLIM3	3.92195e-199	-3.83746	0.047	0.467	1.43547e-194	Lymphoid	PDLIM3
MT-CO2	1.56828e-198	2.34408	0.633	0.364	5.74005e-194	Lymphoid	MT-CO2
PTK2B	2.45785e-198	3.39716	0.139	0.021	8.99596e-194	Lymphoid	PTK2B
KIF21B	6.5629e-198	5.68491	0.029	0.001	2.40209e-193	Lymphoid	KIF21B
SLFN5	4.0556e-197	3.28067	0.146	0.024	1.48439e-192	Lymphoid	SLFN5
RYR1	7.89747e-196	-3.37877	0.049	0.471	2.89055e-191	Lymphoid	RYR1
ST8SIA1	1.88844e-194	2.98193	0.166	0.03	6.9119e-190	Lymphoid	ST8SIA1
FMNL1	2.69015e-194	3.58391	0.112	0.015	9.84621e-190	Lymphoid	FMNL1
MIR133A1HG	3.0652e-194	-3.92954	0.046	0.459	1.12189e-189	Lymphoid	MIR133A1HG
SATB1-AS1	8.13652e-193	5.4992	0.039	0.002	2.97805e-188	Lymphoid	SATB1-AS1
RIF1	1.11885e-192	-3.4818	0.078	0.488	4.09512e-188	Lymphoid	RIF1
SOX6	2.06578e-192	-4.81516	0.018	0.426	7.56098e-188	Lymphoid	SOX6
LLGL2	2.70631e-192	4.25259	0.058	0.004	9.90536e-188	Lymphoid	LLGL2
RESF1	1.73654e-191	3.0513	0.205	0.045	6.35591e-187	Lymphoid	RESF1
RAP1GAP2	2.1515e-191	3.67753	0.123	0.018	7.8747e-187	Lymphoid	RAP1GAP2
PDE4DIP	5.88932e-191	-3.12801	0.058	0.474	2.15555e-186	Lymphoid	PDE4DIP
AC067945.3	2.2159e-190	6.16749	0.018	0	8.11041e-186	Lymphoid	AC067945.3
KLRF1	7.46781e-190	6.24385	0.02	0	2.73329e-185	Lymphoid	KLRF1
IL21R	8.28396e-189	5.35449	0.035	0.002	3.03201e-184	Lymphoid	IL21R
RORA	1.91548e-188	-1.83448	0.246	0.663	7.01086e-184	Lymphoid	RORA
PCAT1	5.20459e-188	3.25547	0.143	0.024	1.90493e-183	Lymphoid	PCAT1
CPED1	9.84162e-188	-4.30482	0.017	0.42	3.60213e-183	Lymphoid	CPED1
APOBEC3D	2.48492e-187	5.45513	0.03	0.001	9.09505e-183	Lymphoid	APOBEC3D
MT-CO1	2.52408e-187	2.22871	0.67	0.432	9.23838e-183	Lymphoid	MT-CO1
PLCH2	1.14812e-186	6.44853	0.017	0	4.20222e-182	Lymphoid	PLCH2
HCLS1	2.06284e-186	3.62845	0.101	0.012	7.5502e-182	Lymphoid	HCLS1
HPGD	5.71957e-186	4.88228	0.067	0.006	2.09342e-181	Lymphoid	HPGD
CD84	2.74946e-184	3.8847	0.078	0.008	1.00633e-179	Lymphoid	CD84
FNBP1	3.42526e-183	2.51384	0.32	0.104	1.25368e-178	Lymphoid	FNBP1
CD28	1.89262e-180	4.71802	0.041	0.002	6.92719e-176	Lymphoid	CD28
FILIP1	3.1795e-180	-4.70602	0.013	0.404	1.16373e-175	Lymphoid	FILIP1
LINC02446	4.97526e-180	7.36801	0.016	0	1.821e-175	Lymphoid	LINC02446
RCAN3	1.07583e-179	3.86218	0.084	0.009	3.93765e-175	Lymphoid	RCAN3
MT-CYB	8.21133e-179	2.31118	0.552	0.291	3.00543e-174	Lymphoid	MT-CYB
CD36	8.03835e-177	-3.97976	0.032	0.42	2.94212e-172	Lymphoid	CD36
STAP1	3.03846e-176	6.02598	0.018	0	1.11211e-171	Lymphoid	STAP1
MT-ND2	4.62582e-176	2.32372	0.488	0.229	1.6931e-171	Lymphoid	MT-ND2
ARHGEF1	7.55186e-176	3.23059	0.15	0.027	2.76406e-171	Lymphoid	ARHGEF1
PREX1	1.29262e-174	3.13567	0.196	0.044	4.7311e-170	Lymphoid	PREX1
CCDC88B	1.06742e-172	4.60564	0.045	0.003	3.90687e-168	Lymphoid	CCDC88B
LAT	1.82544e-172	4.31172	0.067	0.006	6.68129e-168	Lymphoid	LAT
JAKMIP2-AS1	2.39346e-172	5.7592	0.023	0.001	8.7603e-168	Lymphoid	JAKMIP2-AS1
PAG1	2.66381e-171	2.94029	0.176	0.037	9.7498e-167	Lymphoid	PAG1
NUP210	7.57303e-171	3.79758	0.115	0.017	2.7718e-166	Lymphoid	NUP210
OBSCN	1.34032e-170	-2.8908	0.069	0.459	4.90571e-166	Lymphoid	OBSCN
MTRNR2L12	1.7895e-169	2.2593	0.488	0.232	6.54974e-165	Lymphoid	MTRNR2L12
NFIA	4.248e-169	-2.54477	0.062	0.462	1.55481e-164	Lymphoid	NFIA
MT-ND3	1.09355e-167	2.32884	0.631	0.399	4.00251e-163	Lymphoid	MT-ND3
NFIB	1.76667e-166	-3.96351	0.026	0.401	6.46621e-162	Lymphoid	NFIB
MYOT	4.18006e-166	-3.83602	0.03	0.404	1.52994e-161	Lymphoid	MYOT
DOCK11	1.27906e-165	2.65239	0.189	0.042	4.68147e-161	Lymphoid	DOCK11
LDB3	1.64814e-165	-3.33987	0.036	0.414	6.03235e-161	Lymphoid	LDB3
ERP27	2.52931e-165	5.26214	0.032	0.001	9.25751e-161	Lymphoid	ERP27
DLG2	2.98536e-165	-2.9644	0.045	0.426	1.09267e-160	Lymphoid	DLG2
UBE2E2	5.1878e-165	-2.97176	0.044	0.429	1.89879e-160	Lymphoid	UBE2E2
ST6GAL1	5.45349e-164	2.52556	0.214	0.053	1.99603e-159	Lymphoid	ST6GAL1
RAB44	7.23023e-164	7.16789	0.012	0	2.64634e-159	Lymphoid	RAB44
TNF	7.83792e-164	6.91329	0.013	0	2.86876e-159	Lymphoid	TNF
IL10RA	3.87755e-163	3.4242	0.089	0.011	1.41922e-158	Lymphoid	IL10RA
ARHGAP4	4.11167e-163	3.37438	0.096	0.013	1.50491e-158	Lymphoid	ARHGAP4
AC020909.2	1.08144e-162	-3.02573	0.091	0.465	3.95818e-158	Lymphoid	AC020909.2
FAM107B	1.96767e-160	3.36029	0.12	0.019	7.20187e-156	Lymphoid	FAM107B
TEAD1	1.78099e-159	-4.13784	0.018	0.38	6.51859e-155	Lymphoid	TEAD1
LAMA2	3.01137e-159	-4.45834	0.027	0.388	1.10219e-154	Lymphoid	LAMA2
MT-ND5	1.6234e-158	2.43391	0.355	0.136	5.94181e-154	Lymphoid	MT-ND5
Z83844.2	5.33061e-158	4.16603	0.055	0.004	1.95106e-153	Lymphoid	Z83844.2
CD200R1	9.48531e-158	4.04086	0.057	0.005	3.47172e-153	Lymphoid	CD200R1
SEMA4D	3.04903e-157	3.14769	0.181	0.042	1.11597e-152	Lymphoid	SEMA4D
RGS13	3.07597e-157	5.69435	0.036	0.002	1.12583e-152	Lymphoid	RGS13
FAM49B	4.31685e-157	2.59453	0.287	0.095	1.58001e-152	Lymphoid	FAM49B
ATP1A2	5.56106e-157	-3.48068	0.036	0.4	2.0354e-152	Lymphoid	ATP1A2
AGBL1	1.78054e-156	-4.35631	0.02	0.374	6.51696e-152	Lymphoid	AGBL1
CADM2	3.01128e-156	-3.6234	0.027	0.388	1.10216e-151	Lymphoid	CADM2
NOL4L	4.7312e-156	3.85813	0.067	0.007	1.73167e-151	Lymphoid	NOL4L
NCKAP1L	5.412e-155	3.4208	0.086	0.011	1.98085e-150	Lymphoid	NCKAP1L
PARP15	1.5065e-154	3.87251	0.102	0.015	5.51394e-150	Lymphoid	PARP15
PARD3	5.36634e-154	-3.87556	0.02	0.375	1.96413e-149	Lymphoid	PARD3
DGKA	5.54162e-154	3.97634	0.071	0.008	2.02829e-149	Lymphoid	DGKA
LINC00612	1.19423e-153	4.288	0.088	0.012	4.37102e-149	Lymphoid	LINC00612
MYPN	1.22184e-153	-4.27669	0.017	0.368	4.47204e-149	Lymphoid	MYPN
LINC00649	9.02751e-153	4.19341	0.076	0.009	3.30416e-148	Lymphoid	LINC00649
ANK2	1.12372e-152	-4.16238	0.017	0.367	4.11294e-148	Lymphoid	ANK2
ARHGAP9	1.55966e-152	4.34509	0.044	0.003	5.70849e-148	Lymphoid	ARHGAP9
NEXN	2.62887e-152	-3.3759	0.039	0.397	9.62193e-148	Lymphoid	NEXN
PBX4	2.64508e-152	4.5544	0.053	0.004	9.68124e-148	Lymphoid	PBX4
TIGIT	3.65381e-152	5.76282	0.027	0.001	1.33733e-147	Lymphoid	TIGIT
TCF4	2.0639e-151	-3.34297	0.037	0.395	7.55407e-147	Lymphoid	TCF4
MS4A1	3.7405e-151	5.78505	0.012	0	1.36906e-146	Lymphoid	MS4A1
ZFYVE28	3.96556e-151	3.47821	0.125	0.022	1.45144e-146	Lymphoid	ZFYVE28
KLRG1	5.07097e-151	3.69156	0.124	0.022	1.85603e-146	Lymphoid	KLRG1
AC104078.1	3.00941e-150	7.44214	0.013	0	1.10147e-145	Lymphoid	AC104078.1
TRDN-AS1	5.69684e-150	-4.72758	0.009	0.351	2.0851e-145	Lymphoid	TRDN-AS1
PTPRM	7.45968e-150	-2.43478	0.081	0.455	2.73032e-145	Lymphoid	PTPRM
AKAP6	2.09927e-148	-3.53046	0.025	0.371	7.68353e-144	Lymphoid	AKAP6
ACTN2	2.37039e-148	-3.25157	0.034	0.384	8.67585e-144	Lymphoid	ACTN2
TACC2	3.70748e-148	-4.09807	0.021	0.364	1.35697e-143	Lymphoid	TACC2
PIK3CD-AS2	1.68098e-147	4.6613	0.033	0.002	6.15254e-143	Lymphoid	PIK3CD-AS2
MT-CO3	2.30893e-147	1.89136	0.672	0.47	8.45093e-143	Lymphoid	MT-CO3
MPZL3	6.74087e-147	4.47708	0.035	0.002	2.46722e-142	Lymphoid	MPZL3
CMSS1	8.91637e-147	-2.55025	0.095	0.455	3.26348e-142	Lymphoid	CMSS1
HELB	1.82592e-146	3.41306	0.103	0.016	6.68306e-142	Lymphoid	HELB
AC011287.1	3.5117e-146	-3.47503	0.039	0.384	1.28532e-141	Lymphoid	AC011287.1
AC092821.3	7.33343e-146	3.6328	0.09	0.013	2.68411e-141	Lymphoid	AC092821.3
CAP2	8.15458e-146	-4.05306	0.017	0.356	2.98466e-141	Lymphoid	CAP2
RUNX1	5.88121e-145	1.62996	0.428	0.192	2.15258e-140	Lymphoid	RUNX1
MT-ND4	3.77077e-144	2.17539	0.501	0.267	1.38014e-139	Lymphoid	MT-ND4
CD300A	8.30527e-144	4.96275	0.032	0.002	3.03981e-139	Lymphoid	CD300A
SHISAL2A	2.63102e-143	5.3151	0.031	0.002	9.62981e-139	Lymphoid	SHISAL2A
SAMD4A	3.54492e-143	-2.83233	0.041	0.389	1.29747e-138	Lymphoid	SAMD4A
SRGN	4.80208e-142	3.27377	0.077	0.01	1.75761e-137	Lymphoid	SRGN
NRAP	3.18301e-141	-3.78581	0.025	0.359	1.16502e-136	Lymphoid	NRAP
CDK15	1.7866e-140	4.9929	0.044	0.003	6.53915e-136	Lymphoid	CDK15
ADCY2	2.19198e-140	-4.51594	0.012	0.339	8.02288e-136	Lymphoid	ADCY2
WIPF1	6.22318e-140	2.21005	0.253	0.079	2.27775e-135	Lymphoid	WIPF1
LINC01091	6.98652e-140	-4.81543	0.013	0.339	2.55714e-135	Lymphoid	LINC01091
PRKN	1.92263e-139	-1.87841	0.086	0.454	7.03702e-135	Lymphoid	PRKN
STK39	7.0889e-139	2.72176	0.188	0.048	2.59461e-134	Lymphoid	STK39
MYO18B	9.26416e-139	-4.19629	0.016	0.343	3.39077e-134	Lymphoid	MYO18B
APBA2	3.12751e-136	4.82597	0.034	0.002	1.1447e-131	Lymphoid	APBA2
DENND2C	9.63373e-136	-4.39072	0.017	0.336	3.52604e-131	Lymphoid	DENND2C
AOPEP	9.95103e-136	-2.03634	0.078	0.434	3.64218e-131	Lymphoid	AOPEP
TG	1.29842e-135	4.16362	0.046	0.004	4.75233e-131	Lymphoid	TG
TNFSF8	1.62082e-135	4.05437	0.05	0.004	5.93238e-131	Lymphoid	TNFSF8
PPP2R3A	7.15721e-133	-2.78791	0.046	0.378	2.61961e-128	Lymphoid	PPP2R3A
AL121985.1	2.27964e-132	5.06862	0.027	0.001	8.34372e-128	Lymphoid	AL121985.1
CDC14A	2.62128e-132	2.80174	0.174	0.043	9.59414e-128	Lymphoid	CDC14A
ELMO1	1.17895e-131	1.6337	0.346	0.134	4.31507e-127	Lymphoid	ELMO1
PCNX2	1.62154e-131	2.61717	0.171	0.042	5.93499e-127	Lymphoid	PCNX2
THRB	8.49434e-131	-4.5912	0.008	0.316	3.10901e-126	Lymphoid	THRB
AC243829.4	1.51751e-130	5.53096	0.015	0	5.55425e-126	Lymphoid	AC243829.4
PZP	2.46303e-130	3.09895	0.189	0.051	9.01495e-126	Lymphoid	PZP
CD5	3.32766e-129	5.19789	0.034	0.002	1.21796e-124	Lymphoid	CD5
AC108734.4	9.66697e-129	-5.21624	0.01	0.314	3.53821e-124	Lymphoid	AC108734.4
SELL	1.97347e-128	5.4423	0.027	0.001	7.22309e-124	Lymphoid	SELL
KIF13A	1.0063e-126	-3.13019	0.029	0.344	3.68314e-122	Lymphoid	KIF13A
ARPP21	2.17118e-126	-4.61125	0.01	0.31	7.94675e-122	Lymphoid	ARPP21
RNF213	6.04223e-126	2.14163	0.319	0.129	2.21152e-121	Lymphoid	RNF213
PARVG	6.07675e-126	3.95565	0.054	0.005	2.22415e-121	Lymphoid	PARVG
GPR65	4.11279e-125	4.8619	0.026	0.001	1.50532e-120	Lymphoid	GPR65
AC068587.4	1.54307e-124	2.70679	0.256	0.09	5.6478e-120	Lymphoid	AC068587.4
FHL1	4.43363e-124	-2.63788	0.053	0.373	1.62275e-119	Lymphoid	FHL1
MAGI1	5.13466e-124	-4.092	0.015	0.316	1.87934e-119	Lymphoid	MAGI1
LINC01163	1.0376e-123	6.32246	0.015	0	3.79774e-119	Lymphoid	LINC01163
JAK3	1.63029e-123	4.24999	0.039	0.003	5.96703e-119	Lymphoid	JAK3
ZFPM2-AS1	3.47585e-123	-4.50924	0.013	0.31	1.27219e-118	Lymphoid	ZFPM2-AS1
BTN3A1	4.09488e-123	3.19265	0.102	0.018	1.49877e-118	Lymphoid	BTN3A1
C1orf21	1.02875e-121	-2.65663	0.044	0.358	3.76533e-117	Lymphoid	C1orf21
RAB27A	9.8031e-121	3.07939	0.111	0.021	3.58803e-116	Lymphoid	RAB27A
ADAM8	1.17297e-120	4.60791	0.036	0.003	4.29317e-116	Lymphoid	ADAM8
AL078590.2	2.65035e-120	5.02295	0.028	0.002	9.70056e-116	Lymphoid	AL078590.2
NBEAL2	2.7778e-120	3.45395	0.077	0.011	1.0167e-115	Lymphoid	NBEAL2
GHR	4.42063e-120	-4.60491	0.011	0.302	1.618e-115	Lymphoid	GHR
TTC16	6.07091e-119	5.64303	0.015	0	2.22201e-114	Lymphoid	TTC16
GALNT3	1.67321e-118	4.1732	0.036	0.003	6.12411e-114	Lymphoid	GALNT3
SORBS1	2.51041e-117	-2.91372	0.04	0.341	9.18837e-113	Lymphoid	SORBS1
MEF2C-AS1	2.59633e-117	-4.83932	0.011	0.295	9.50283e-113	Lymphoid	MEF2C-AS1
IPCEF1	3.64502e-117	3.44484	0.078	0.012	1.33412e-112	Lymphoid	IPCEF1
TRERF1	6.3368e-117	2.37733	0.181	0.05	2.31933e-112	Lymphoid	TRERF1
INPP4B	1.01595e-116	2.049	0.34	0.15	3.71849e-112	Lymphoid	INPP4B
DEC1	1.37319e-116	2.04325	0.095	0.016	5.026e-112	Lymphoid	DEC1
HLA-F	1.23442e-115	2.87836	0.109	0.021	4.51811e-111	Lymphoid	HLA-F
ZBTB20	2.80178e-115	-0.813951	0.556	0.847	1.02548e-110	Lymphoid	ZBTB20
STYK1	3.93484e-115	4.9022	0.022	0.001	1.44019e-110	Lymphoid	STYK1
KIF1B	5.75094e-115	-2.3422	0.056	0.365	2.1049e-110	Lymphoid	KIF1B
AL023653.1	2.01623e-114	6.38138	0.011	0	7.3796e-110	Lymphoid	AL023653.1
HSH2D	3.22245e-114	4.77556	0.029	0.002	1.17945e-109	Lymphoid	HSH2D
SH2D2A	5.63008e-114	5.83702	0.015	0	2.06067e-109	Lymphoid	SH2D2A
GCSAML	6.52093e-114	6.9287	0.01	0	2.38672e-109	Lymphoid	GCSAML
ASB5	7.91859e-114	-3.83777	0.018	0.301	2.89828e-109	Lymphoid	ASB5
STK26	2.14447e-112	4.66795	0.028	0.002	7.84899e-108	Lymphoid	STK26
SGCG	6.07015e-112	-4.14396	0.011	0.287	2.22173e-107	Lymphoid	SGCG
LINC02100	7.09155e-112	3.67874	0.054	0.006	2.59558e-107	Lymphoid	LINC02100
PPP1R12B	8.75074e-112	-1.87103	0.086	0.403	3.20286e-107	Lymphoid	PPP1R12B
AP1S3	1.03156e-111	4.45365	0.05	0.005	3.77562e-107	Lymphoid	AP1S3
PSMB9	1.0845e-111	3.37266	0.074	0.011	3.96939e-107	Lymphoid	PSMB9
RNF125	1.39357e-111	2.89631	0.11	0.022	5.1006e-107	Lymphoid	RNF125
MIR155HG	1.51044e-111	4.21531	0.057	0.007	5.52837e-107	Lymphoid	MIR155HG
AC010680.5	1.51086e-111	-4.55036	0.009	0.283	5.52991e-107	Lymphoid	AC010680.5
PTPRG	2.24983e-111	-3.72536	0.022	0.301	8.2346e-107	Lymphoid	PTPRG
HPGDS	2.57865e-111	4.0419	0.057	0.007	9.43811e-107	Lymphoid	HPGDS
LINC00243	4.27306e-111	5.06184	0.023	0.001	1.56398e-106	Lymphoid	LINC00243
TP63	6.57982e-111	-4.6749	0.013	0.286	2.40828e-106	Lymphoid	TP63
TNRC6C-AS1	1.5557e-110	4.30842	0.035	0.003	5.69402e-106	Lymphoid	TNRC6C-AS1
RAB37	1.92899e-110	4.36991	0.032	0.002	7.06029e-106	Lymphoid	RAB37
NFATC2	3.52035e-110	2.79113	0.142	0.035	1.28848e-105	Lymphoid	NFATC2
LINC00892	4.29554e-110	5.51694	0.018	0.001	1.57221e-105	Lymphoid	LINC00892
TTC39B	1.96765e-109	2.9675	0.107	0.021	7.20181e-105	Lymphoid	TTC39B
AC131568.1	2.64651e-109	3.00587	0.133	0.031	9.68648e-105	Lymphoid	AC131568.1
GBE1	2.77888e-109	-1.97396	0.09	0.402	1.0171e-104	Lymphoid	GBE1
RBM24	3.20995e-109	-4.10904	0.014	0.286	1.17488e-104	Lymphoid	RBM24
ABCD2	7.78513e-109	4.19506	0.037	0.003	2.84944e-104	Lymphoid	ABCD2
ARHGAP24	1.49572e-108	-3.3362	0.022	0.298	5.4745e-104	Lymphoid	ARHGAP24
PBX1	3.61631e-108	-2.74454	0.033	0.317	1.32361e-103	Lymphoid	PBX1
RHEX	4.63519e-108	4.89836	0.025	0.001	1.69653e-103	Lymphoid	RHEX
TSPAN5	6.21472e-108	2.6416	0.128	0.029	2.27465e-103	Lymphoid	TSPAN5
LIME1	1.23718e-106	4.24223	0.048	0.005	4.52822e-102	Lymphoid	LIME1
SFI1	1.46952e-106	3.13985	0.095	0.018	5.37858e-102	Lymphoid	SFI1
RCAN3AS	1.61937e-106	4.12517	0.04	0.004	5.92705e-102	Lymphoid	RCAN3AS
MAP4	7.0973e-106	-1.4642	0.15	0.48	2.59768e-101	Lymphoid	MAP4
AL606804.1	1.03346e-105	6.06339	0.013	0	3.78256e-101	Lymphoid	AL606804.1
MT-ND1	1.16969e-105	1.84424	0.47	0.273	4.28119e-101	Lymphoid	MT-ND1
LRRTM3	1.58486e-105	-4.23238	0.008	0.271	5.80075e-101	Lymphoid	LRRTM3
SP100	1.62281e-105	2.05902	0.274	0.108	5.93963e-101	Lymphoid	SP100
EVL	1.95918e-105	2.36375	0.226	0.079	7.17079e-101	Lymphoid	EVL
EYA4	2.09392e-105	-3.54833	0.015	0.282	7.66394e-101	Lymphoid	EYA4
RNF166	7.72634e-104	3.48642	0.07	0.01	2.82792e-99	Lymphoid	RNF166
TPD52L1	8.65665e-104	-3.83238	0.015	0.278	3.16842e-99	Lymphoid	TPD52L1
PALMD	1.6687e-103	-3.74107	0.011	0.272	6.10762e-99	Lymphoid	PALMD
AL133257.1	1.80999e-103	-5.02756	0.006	0.263	6.62474e-99	Lymphoid	AL133257.1
FGF13	2.15775e-103	-4.71897	0.011	0.269	7.89758e-99	Lymphoid	FGF13
AMPD1	2.90831e-103	-3.36972	0.021	0.287	1.06447e-98	Lymphoid	AMPD1
ATP2A2	4.22912e-103	-2.4533	0.088	0.371	1.5479e-98	Lymphoid	ATP2A2
NELL2	3.07754e-102	4.41235	0.043	0.004	1.12641e-97	Lymphoid	NELL2
AL136962.1	7.96177e-102	4.21959	0.027	0.002	2.91409e-97	Lymphoid	AL136962.1
ATM	2.56171e-101	2.29971	0.28	0.117	9.37613e-97	Lymphoid	ATM
AC106791.1	7.94127e-101	-3.41314	0.019	0.279	2.90659e-96	Lymphoid	AC106791.1
IGHM	9.90896e-100	7.09198	0.011	0	3.62678e-95	Lymphoid	IGHM
TTTY14	1.04509e-99	-2.18754	0.053	0.33	3.82513e-95	Lymphoid	TTTY14
RAB8B	3.61402e-99	2.70051	0.118	0.027	1.32277e-94	Lymphoid	RAB8B
STK17A	6.23491e-99	2.79288	0.173	0.053	2.28204e-94	Lymphoid	STK17A
APOBEC3C	8.28971e-99	4.45301	0.029	0.002	3.03412e-94	Lymphoid	APOBEC3C
FLRT2	1.47134e-98	-4.68501	0.009	0.258	5.38526e-94	Lymphoid	FLRT2
TSPOAP1-AS1	1.5998e-98	3.26939	0.09	0.017	5.85542e-94	Lymphoid	TSPOAP1-AS1
AC124014.1	7.83317e-98	5.80383	0.011	0	2.86702e-93	Lymphoid	AC124014.1
PARD3B	2.13896e-97	-2.69396	0.034	0.298	7.82881e-93	Lymphoid	PARD3B
MAP3K20	2.57941e-97	-3.06516	0.021	0.276	9.44089e-93	Lymphoid	MAP3K20
BICC1	2.71981e-97	-5.77145	0.006	0.25	9.95479e-93	Lymphoid	BICC1
FCHO1	1.00576e-96	4.61238	0.024	0.001	3.68118e-92	Lymphoid	FCHO1
TRABD2A	7.69295e-96	4.92061	0.025	0.002	2.8157e-91	Lymphoid	TRABD2A
XPO4	3.12579e-95	-2.56827	0.1	0.368	1.14407e-90	Lymphoid	XPO4
SIGIRR	3.3343e-95	3.52241	0.054	0.007	1.22039e-90	Lymphoid	SIGIRR
BTN3A2	7.38994e-95	3.0315	0.084	0.015	2.70479e-90	Lymphoid	BTN3A2
TRIO	9.00527e-95	-1.97244	0.064	0.339	3.29602e-90	Lymphoid	TRIO
CECR2	1.66964e-94	-3.92261	0.013	0.257	6.11106e-90	Lymphoid	CECR2
FLI1	7.94629e-94	1.54713	0.233	0.083	2.90842e-89	Lymphoid	FLI1
STXBP2	1.72027e-93	4.199	0.029	0.002	6.29638e-89	Lymphoid	STXBP2
PIK3CG	1.9898e-93	3.81332	0.041	0.004	7.28288e-89	Lymphoid	PIK3CG
KLRD1	2.4316e-93	3.67569	0.09	0.018	8.8999e-89	Lymphoid	KLRD1
MAP4K3	2.57295e-93	-2.06864	0.047	0.313	9.41727e-89	Lymphoid	MAP4K3
SUSD3	3.70346e-93	5.49134	0.013	0	1.3555e-88	Lymphoid	SUSD3
GPHN	4.35885e-93	-1.57148	0.082	0.366	1.59538e-88	Lymphoid	GPHN
STX3	6.71543e-93	3.72411	0.087	0.017	2.45791e-88	Lymphoid	STX3
SETBP1	9.38332e-93	-1.83236	0.065	0.339	3.43439e-88	Lymphoid	SETBP1
STK3	1.01119e-92	-2.30586	0.047	0.309	3.70104e-88	Lymphoid	STK3
MIR1-1HG	1.23604e-92	-2.55017	0.031	0.283	4.52402e-88	Lymphoid	MIR1-1HG
GALNT6	3.58891e-92	4.32739	0.028	0.002	1.31358e-87	Lymphoid	GALNT6
FBXO32	1.10327e-91	-2.89805	0.041	0.293	4.0381e-87	Lymphoid	FBXO32
DOCK4	1.84584e-91	-4.08778	0.013	0.249	6.75597e-87	Lymphoid	DOCK4
KALRN	4.82456e-91	-3.51961	0.013	0.251	1.76584e-86	Lymphoid	KALRN
AC008083.2	7.80788e-91	4.6519	0.023	0.001	2.85776e-86	Lymphoid	AC008083.2
ID2	7.99376e-91	3.24976	0.069	0.011	2.9258e-86	Lymphoid	ID2
CDC42BPA	9.57128e-91	-3.73262	0.016	0.254	3.50319e-86	Lymphoid	CDC42BPA
NAALADL2	9.8339e-91	-1.70849	0.078	0.353	3.59931e-86	Lymphoid	NAALADL2
RIN2	2.53037e-90	-3.03487	0.023	0.265	9.2614e-86	Lymphoid	RIN2
UACA	3.18037e-90	-3.52173	0.016	0.254	1.16405e-85	Lymphoid	UACA
ALPK3	3.46852e-90	-3.90636	0.013	0.247	1.26951e-85	Lymphoid	ALPK3
PTPRQ	4.1916e-90	-4.84462	0.006	0.236	1.53417e-85	Lymphoid	PTPRQ
FOXP2	6.45524e-90	-4.03183	0.008	0.238	2.36268e-85	Lymphoid	FOXP2
ZNF385D	1.09303e-89	-4.32512	0.011	0.242	4.00059e-85	Lymphoid	ZNF385D
ESRRG	1.36262e-89	-4.17813	0.009	0.239	4.98732e-85	Lymphoid	ESRRG
PDE7B	1.29773e-88	-1.91303	0.06	0.322	4.74981e-84	Lymphoid	PDE7B
AGL	1.75731e-88	-2.34767	0.052	0.306	6.43191e-84	Lymphoid	AGL
CAPN3	2.03283e-88	-2.91341	0.023	0.263	7.44035e-84	Lymphoid	CAPN3
S1PR4	2.79411e-88	6.07294	0.01	0	1.02267e-83	Lymphoid	S1PR4
IL27RA	8.41256e-88	3.97578	0.037	0.004	3.07908e-83	Lymphoid	IL27RA
TMSB4X	1.32651e-87	2.60577	0.123	0.032	4.85515e-83	Lymphoid	TMSB4X
MYOM3	2.32561e-87	-3.9083	0.013	0.242	8.51197e-83	Lymphoid	MYOM3
AC008569.1	2.44076e-87	3.66635	0.053	0.007	8.93342e-83	Lymphoid	AC008569.1
TAP1	2.5369e-87	3.19499	0.069	0.012	9.2853e-83	Lymphoid	TAP1
FCGR3A	2.83474e-87	4.52905	0.024	0.002	1.03754e-82	Lymphoid	FCGR3A
HS3ST5	6.98357e-87	-3.89496	0.011	0.238	2.55606e-82	Lymphoid	HS3ST5
NCR1	2.53109e-86	6.33838	0.01	0	9.26405e-82	Lymphoid	NCR1
SLC18A2	3.20628e-86	3.94693	0.066	0.011	1.17353e-81	Lymphoid	SLC18A2
NRP1	4.60404e-86	-3.74362	0.018	0.246	1.68512e-81	Lymphoid	NRP1
GLOD5	7.48051e-86	5.44808	0.015	0.001	2.73794e-81	Lymphoid	GLOD5
CCM2	8.25622e-86	2.4258	0.167	0.054	3.02186e-81	Lymphoid	CCM2
GIMAP7	9.79619e-86	3.07728	0.064	0.01	3.5855e-81	Lymphoid	GIMAP7
PRRX1	1.00897e-85	-4.68719	0.008	0.229	3.69293e-81	Lymphoid	PRRX1
SYTL3	1.02316e-85	2.76209	0.195	0.071	3.74486e-81	Lymphoid	SYTL3
SNED1	1.35499e-85	-2.46876	0.041	0.285	4.95939e-81	Lymphoid	SNED1
PACS1	5.3557e-85	2.0867	0.268	0.118	1.96024e-80	Lymphoid	PACS1
ABCC9	7.05997e-85	-4.47245	0.008	0.228	2.58402e-80	Lymphoid	ABCC9
NPHP1	9.66365e-85	-3.85012	0.011	0.233	3.53699e-80	Lymphoid	NPHP1
JAML	1.12629e-84	3.3146	0.047	0.006	4.12234e-80	Lymphoid	JAML
CA6	1.32883e-84	6.44509	0.011	0	4.86367e-80	Lymphoid	CA6
SUN2	1.40357e-84	2.94929	0.106	0.025	5.13722e-80	Lymphoid	SUN2
PTK2	5.31849e-84	-2.32465	0.041	0.281	1.94662e-79	Lymphoid	PTK2
FMNL2	6.35676e-84	-3.08592	0.022	0.251	2.32664e-79	Lymphoid	FMNL2
APBB2	9.59438e-84	-3.73354	0.017	0.24	3.51164e-79	Lymphoid	APBB2
ARRDC5	1.317e-83	4.33046	0.025	0.002	4.82037e-79	Lymphoid	ARRDC5
RASA2	5.20089e-83	2.15292	0.249	0.107	1.90358e-78	Lymphoid	RASA2
AC007319.1	1.89482e-82	-3.5773	0.015	0.235	6.93524e-78	Lymphoid	AC007319.1
SAMD9	2.01859e-82	3.22462	0.054	0.008	7.38824e-78	Lymphoid	SAMD9
C5orf58	2.58198e-82	5.24857	0.015	0.001	9.45029e-78	Lymphoid	C5orf58
PDZRN3	8.65708e-82	-4.62092	0.01	0.224	3.16858e-77	Lymphoid	PDZRN3
PPP1R16B	9.19731e-82	2.14219	0.113	0.028	3.36631e-77	Lymphoid	PPP1R16B
PATL2	1.2038e-81	3.87443	0.041	0.005	4.40602e-77	Lymphoid	PATL2
TMEM71	1.92553e-81	3.58422	0.046	0.006	7.04763e-77	Lymphoid	TMEM71
TBC1D4	2.51302e-81	-2.12979	0.04	0.277	9.19792e-77	Lymphoid	TBC1D4
GATA2	8.41865e-81	3.99971	0.032	0.003	3.08131e-76	Lymphoid	GATA2
MYH7	8.60553e-81	-2.22899	0.075	0.316	3.14971e-76	Lymphoid	MYH7
SYNPO2	9.0765e-81	-4.27656	0.011	0.224	3.32209e-76	Lymphoid	SYNPO2
ARHGEF3	1.76206e-80	1.90019	0.261	0.115	6.44932e-76	Lymphoid	ARHGEF3
RCSD1	4.84645e-80	2.01085	0.273	0.126	1.77385e-75	Lymphoid	RCSD1
XIRP2	1.2456e-79	-3.18236	0.019	0.236	4.55903e-75	Lymphoid	XIRP2
ITPKB	1.55143e-79	2.32205	0.127	0.035	5.6784e-75	Lymphoid	ITPKB
CELF2	2.25196e-79	1.13029	0.496	0.315	8.2424e-75	Lymphoid	CELF2
LINC01138	4.12041e-79	2.57278	0.133	0.039	1.50811e-74	Lymphoid	LINC01138
GLCCI1	7.87654e-79	2.45174	0.175	0.061	2.88289e-74	Lymphoid	GLCCI1
ZBTB16	9.39712e-79	-2.09213	0.046	0.28	3.43944e-74	Lymphoid	ZBTB16
RHOBTB1	1.28225e-78	-4.94798	0.006	0.211	4.69316e-74	Lymphoid	RHOBTB1
SEMA3C	1.47879e-78	-3.53322	0.013	0.223	5.41252e-74	Lymphoid	SEMA3C
SESN1	1.84962e-78	-1.58401	0.08	0.33	6.7698e-74	Lymphoid	SESN1
BCL2	2.78632e-78	2.38686	0.287	0.14	1.01982e-73	Lymphoid	BCL2
LRMP	3.51684e-78	3.15637	0.058	0.009	1.2872e-73	Lymphoid	LRMP
GMFG	3.742e-78	3.70064	0.038	0.004	1.36961e-73	Lymphoid	GMFG
AC243829.1	9.76456e-78	4.44286	0.025	0.002	3.57393e-73	Lymphoid	AC243829.1
PEBP4	1.86926e-77	-3.63864	0.013	0.222	6.84169e-73	Lymphoid	PEBP4
GPSM3	1.92588e-77	4.31804	0.022	0.002	7.04892e-73	Lymphoid	GPSM3
FBXL7	3.44959e-77	-3.84425	0.014	0.221	1.26259e-72	Lymphoid	FBXL7
ANKS1B	3.58972e-77	-3.74297	0.015	0.223	1.31387e-72	Lymphoid	ANKS1B
ANO5	4.11049e-77	-5.04141	0.006	0.208	1.50448e-72	Lymphoid	ANO5
ARHGAP6	4.89068e-77	-3.09892	0.024	0.237	1.79004e-72	Lymphoid	ARHGAP6
CAMK1D	5.74582e-77	1.79356	0.214	0.083	2.10303e-72	Lymphoid	CAMK1D
ENPP3	9.95829e-77	4.31298	0.033	0.003	3.64484e-72	Lymphoid	ENPP3
LRRC2	1.27437e-76	-4.15492	0.009	0.213	4.66433e-72	Lymphoid	LRRC2
TXLNB	2.75047e-76	-3.97421	0.008	0.21	1.0067e-71	Lymphoid	TXLNB
PTGER2	3.5469e-76	4.99552	0.015	0.001	1.2982e-71	Lymphoid	PTGER2
MYOM2	4.16254e-76	-2.50037	0.027	0.241	1.52353e-71	Lymphoid	MYOM2
A2M-AS1	5.64674e-76	3.54054	0.064	0.011	2.06676e-71	Lymphoid	A2M-AS1
MCU	6.33628e-76	-1.84139	0.074	0.313	2.31914e-71	Lymphoid	MCU
TTC28	1.34196e-75	-1.81899	0.058	0.292	4.91172e-71	Lymphoid	TTC28
MALAT1	1.39647e-75	-0.712868	0.998	0.997	5.11122e-71	Lymphoid	MALAT1
ASPH	2.05306e-75	-2.25334	0.036	0.256	7.51442e-71	Lymphoid	ASPH
ZBTB20-AS5	3.34807e-75	-1.79629	0.057	0.29	1.22543e-70	Lymphoid	ZBTB20-AS5
MTUS1	5.10806e-75	-3.85923	0.011	0.212	1.8696e-70	Lymphoid	MTUS1
WAS	6.92046e-75	4.36614	0.025	0.002	2.53296e-70	Lymphoid	WAS
SRL	8.25395e-75	-3.6348	0.009	0.21	3.02103e-70	Lymphoid	SRL
MICU1	9.00761e-75	-1.53037	0.08	0.326	3.29688e-70	Lymphoid	MICU1
CLNK	1.43422e-74	3.69055	0.041	0.005	5.24937e-70	Lymphoid	CLNK
MT-ND4L	3.81419e-74	2.19578	0.196	0.075	1.39603e-69	Lymphoid	MT-ND4L
SH2D1A	4.41942e-74	5.10509	0.013	0.001	1.61755e-69	Lymphoid	SH2D1A
MAST2	9.77041e-74	-2.04746	0.039	0.258	3.57607e-69	Lymphoid	MAST2
TRIM54	9.865e-74	-3.28735	0.013	0.215	3.61069e-69	Lymphoid	TRIM54
BCL6	2.36145e-73	-3.0296	0.02	0.225	8.64315e-69	Lymphoid	BCL6
AC009495.3	3.44499e-73	5.29115	0.013	0.001	1.2609e-68	Lymphoid	AC009495.3
SLC4A10	5.92452e-73	4.99765	0.024	0.002	2.16843e-68	Lymphoid	SLC4A10
EBF1	8.55809e-73	-3.91845	0.02	0.218	3.13235e-68	Lymphoid	EBF1
DOK2	1.30719e-72	4.15125	0.025	0.002	4.78444e-68	Lymphoid	DOK2
RCAN2	2.19255e-72	-3.32165	0.016	0.215	8.02496e-68	Lymphoid	RCAN2
C12orf42	3.73833e-72	4.41764	0.021	0.001	1.36827e-67	Lymphoid	C12orf42
SAMHD1	3.79628e-72	2.29218	0.154	0.052	1.38947e-67	Lymphoid	SAMHD1
KLHL31	1.27819e-71	-3.44163	0.01	0.203	4.67832e-67	Lymphoid	KLHL31
GAB1	1.96801e-71	-3.35163	0.014	0.21	7.2031e-67	Lymphoid	GAB1
FSD2	2.42865e-71	-3.15414	0.016	0.214	8.88911e-67	Lymphoid	FSD2
CALD1	3.80211e-71	-3.4147	0.018	0.215	1.39161e-66	Lymphoid	CALD1
PRKCZ	9.58876e-71	3.98735	0.025	0.002	3.50958e-66	Lymphoid	PRKCZ
ACTA1	1.49391e-70	-1.283	0.275	0.538	5.46785e-66	Lymphoid	ACTA1
SPATA13	1.87266e-70	2.33897	0.109	0.029	6.85411e-66	Lymphoid	SPATA13
RUNX1T1	2.05212e-70	-4.49612	0.006	0.194	7.51098e-66	Lymphoid	RUNX1T1
ZNF385B	2.47666e-70	-5.22374	0.006	0.192	9.06484e-66	Lymphoid	ZNF385B
RIN3	3.41122e-70	2.31514	0.122	0.036	1.24854e-65	Lymphoid	RIN3
TNNT1	3.78188e-70	-1.55925	0.145	0.381	1.3842e-65	Lymphoid	TNNT1
PRKD2	1.13499e-69	2.63045	0.086	0.02	4.15419e-65	Lymphoid	PRKD2
DAPK2	1.40405e-69	-3.10102	0.015	0.208	5.13895e-65	Lymphoid	DAPK2
SLC38A1	2.23033e-69	2.41215	0.158	0.056	8.16323e-65	Lymphoid	SLC38A1
PLXDC2	2.52331e-69	-2.20308	0.051	0.261	9.23558e-65	Lymphoid	PLXDC2
AC009313.1	2.60656e-69	3.4068	0.043	0.006	9.54026e-65	Lymphoid	AC009313.1
INPP4A	7.30157e-69	2.24142	0.183	0.071	2.67245e-64	Lymphoid	INPP4A
LRBA	8.85542e-69	1.76771	0.343	0.2	3.24117e-64	Lymphoid	LRBA
VIM-AS1	9.3932e-69	4.11279	0.025	0.002	3.43801e-64	Lymphoid	VIM-AS1
AC015878.1	1.22106e-68	-4.48815	0.005	0.188	4.4692e-64	Lymphoid	AC015878.1
CXCR4	1.77607e-68	3.67767	0.03	0.003	6.5006e-64	Lymphoid	CXCR4
TLN2	2.49197e-68	-3.1711	0.015	0.206	9.12085e-64	Lymphoid	TLN2
CBLB	2.5789e-68	1.70937	0.315	0.17	9.43904e-64	Lymphoid	CBLB
ATP8B2	4.83051e-68	2.82212	0.067	0.013	1.76802e-63	Lymphoid	ATP8B2
CEP112	9.11103e-68	-2.17591	0.039	0.243	3.33473e-63	Lymphoid	CEP112
SLC36A2	1.49568e-67	-3.59684	0.012	0.198	5.47435e-63	Lymphoid	SLC36A2
MEF2C-AS2	2.27023e-67	-4.42154	0.006	0.186	8.30927e-63	Lymphoid	MEF2C-AS2
PRR16	2.71262e-67	-4.8823	0.005	0.185	9.92846e-63	Lymphoid	PRR16
CRIP1	4.49849e-67	2.53033	0.075	0.016	1.64649e-62	Lymphoid	CRIP1
LARGE1	5.61327e-67	-2.90919	0.018	0.208	2.05451e-62	Lymphoid	LARGE1
PPP1R9A	6.52447e-67	-3.24568	0.011	0.195	2.38802e-62	Lymphoid	PPP1R9A
MLIP-AS1	8.80312e-67	-4.05865	0.006	0.186	3.22203e-62	Lymphoid	MLIP-AS1
C22orf34	1.21585e-66	2.42093	0.083	0.019	4.45012e-62	Lymphoid	C22orf34
KLHL41	1.23513e-66	-3.05975	0.014	0.2	4.52068e-62	Lymphoid	KLHL41
EVPL	1.29922e-66	4.90702	0.015	0.001	4.75528e-62	Lymphoid	EVPL
TMEM38A	1.8439e-66	-3.78428	0.011	0.193	6.74887e-62	Lymphoid	TMEM38A
JPH1	2.01347e-66	-3.60129	0.011	0.193	7.3695e-62	Lymphoid	JPH1
AC233976.1	2.2699e-66	5.46097	0.014	0.001	8.30804e-62	Lymphoid	AC233976.1
MEF2A	2.55045e-66	-1.12994	0.138	0.389	9.3349e-62	Lymphoid	MEF2A
AC096751.2	2.91289e-66	5.37681	0.011	0	1.06615e-61	Lymphoid	AC096751.2
BEST3	3.41031e-66	-3.64867	0.009	0.19	1.24821e-61	Lymphoid	BEST3
RNF43	4.64147e-66	4.90407	0.015	0.001	1.69883e-61	Lymphoid	RNF43
INSR	5.1366e-66	-3.22089	0.015	0.201	1.88005e-61	Lymphoid	INSR
ARHGEF12	7.69273e-66	-1.54681	0.057	0.272	2.81561e-61	Lymphoid	ARHGEF12
MSRB3	8.73652e-66	-3.67529	0.009	0.189	3.19765e-61	Lymphoid	MSRB3
AC119396.2	8.82637e-66	4.77251	0.017	0.001	3.23054e-61	Lymphoid	AC119396.2
TFPI	9.77264e-66	-4.91787	0.005	0.181	3.57688e-61	Lymphoid	TFPI
AC012404.1	1.39531e-65	-4.59806	0.004	0.18	5.10698e-61	Lymphoid	AC012404.1
AL138930.1	1.53845e-65	4.64531	0.015	0.001	5.63088e-61	Lymphoid	AL138930.1
SIPA1L1	1.68109e-65	1.97909	0.167	0.062	6.15297e-61	Lymphoid	SIPA1L1
LMCD1	2.71896e-65	-3.47458	0.01	0.189	9.95168e-61	Lymphoid	LMCD1
USP13	2.81624e-65	-2.82202	0.02	0.207	1.03077e-60	Lymphoid	USP13
FAM160A1	2.89691e-65	-4.68906	0.006	0.182	1.0603e-60	Lymphoid	FAM160A1
HDAC2-AS2	3.01091e-65	-3.90859	0.009	0.188	1.10202e-60	Lymphoid	HDAC2-AS2
USP54	3.02019e-65	-2.2286	0.032	0.227	1.10542e-60	Lymphoid	USP54
AC024028.1	3.09039e-65	4.92557	0.013	0.001	1.13111e-60	Lymphoid	AC024028.1
PDK4	3.11167e-65	-5.2531	0.006	0.181	1.1389e-60	Lymphoid	PDK4
ABCA10	4.17483e-65	-3.85148	0.022	0.207	1.52803e-60	Lymphoid	ABCA10
CLTCL1	6.17924e-65	-3.51385	0.008	0.185	2.26166e-60	Lymphoid	CLTCL1
DYSF	1.07152e-64	-3.48628	0.012	0.192	3.92186e-60	Lymphoid	DYSF
MAML2	1.19715e-64	1.52349	0.36	0.208	4.3817e-60	Lymphoid	MAML2
RBL2	1.40739e-64	2.06216	0.228	0.105	5.15118e-60	Lymphoid	RBL2
MYL1	1.96971e-64	-1.82063	0.088	0.303	7.20932e-60	Lymphoid	MYL1
FHIT	2.97831e-64	-1.10563	0.073	0.292	1.09009e-59	Lymphoid	FHIT
MDFIC	5.06509e-64	2.09137	0.221	0.099	1.85387e-59	Lymphoid	MDFIC
ANXA1	5.78865e-64	2.1769	0.14	0.047	2.1187e-59	Lymphoid	ANXA1
UNC13B	9.8222e-64	-3.09846	0.013	0.19	3.59502e-59	Lymphoid	UNC13B
SMCHD1	1.53342e-63	1.89603	0.295	0.161	5.61248e-59	Lymphoid	SMCHD1
COL5A2	1.78318e-63	-3.82147	0.011	0.185	6.52661e-59	Lymphoid	COL5A2
UNC13D	1.7906e-63	3.44741	0.057	0.011	6.55376e-59	Lymphoid	UNC13D
MBNL1-AS1	1.84787e-63	3.44371	0.048	0.008	6.7634e-59	Lymphoid	MBNL1-AS1
KCNMA1	4.93741e-63	-2.52392	0.021	0.204	1.80714e-58	Lymphoid	KCNMA1
VAV3	7.97515e-63	2.14888	0.125	0.04	2.91899e-58	Lymphoid	VAV3
CACNA1S	8.34989e-63	-3.67511	0.01	0.184	3.05614e-58	Lymphoid	CACNA1S
TSPAN2	9.41692e-63	3.05692	0.046	0.007	3.44669e-58	Lymphoid	TSPAN2
ABLIM2	1.93322e-62	-3.53199	0.013	0.187	7.07576e-58	Lymphoid	ABLIM2
C10orf71	2.58593e-62	-4.55977	0.006	0.175	9.46478e-58	Lymphoid	C10orf71
SNX20	2.65434e-62	4.70566	0.014	0.001	9.71514e-58	Lymphoid	SNX20
AL162493.1	2.90313e-62	4.82497	0.018	0.001	1.06257e-57	Lymphoid	AL162493.1
RASAL2	3.21822e-62	-2.59695	0.025	0.208	1.1779e-57	Lymphoid	RASAL2
SH3D19	3.7735e-62	-2.19503	0.041	0.232	1.38114e-57	Lymphoid	SH3D19
YBX3	3.78448e-62	-2.46515	0.026	0.21	1.38516e-57	Lymphoid	YBX3
PPFIBP1	3.78871e-62	-3.82971	0.011	0.183	1.38671e-57	Lymphoid	PPFIBP1
ERBB4	4.05002e-62	-5.08059	0.006	0.174	1.48235e-57	Lymphoid	ERBB4
IL12RB1	4.63648e-62	4.69909	0.017	0.001	1.697e-57	Lymphoid	IL12RB1
MNAT1	6.94448e-62	-1.27552	0.087	0.309	2.54175e-57	Lymphoid	MNAT1
SLCO5A1	7.71472e-62	-3.55738	0.012	0.185	2.82366e-57	Lymphoid	SLCO5A1
CREB5	1.2788e-61	-3.07742	0.018	0.194	4.68053e-57	Lymphoid	CREB5
ABCA1	1.62352e-61	-2.08266	0.033	0.221	5.94223e-57	Lymphoid	ABCA1
PLCXD2	1.70705e-61	4.08391	0.029	0.003	6.24797e-57	Lymphoid	PLCXD2
TMTC1	1.95128e-61	-3.89642	0.012	0.183	7.14188e-57	Lymphoid	TMTC1
ANGPT1	1.95727e-61	-5.86212	0.004	0.168	7.16381e-57	Lymphoid	ANGPT1
TSEN54	2.20008e-61	3.38129	0.05	0.009	8.05252e-57	Lymphoid	TSEN54
CNTRL	3.0255e-61	2.35598	0.128	0.042	1.10736e-56	Lymphoid	CNTRL
SLC25A36	3.04256e-61	-1.74902	0.041	0.235	1.11361e-56	Lymphoid	SLC25A36
PRKX	3.06666e-61	2.77945	0.074	0.017	1.12243e-56	Lymphoid	PRKX
BLM	4.50345e-61	3.88839	0.026	0.003	1.64831e-56	Lymphoid	BLM
LRRC39	4.55742e-61	-3.0945	0.015	0.189	1.66806e-56	Lymphoid	LRRC39
IKBKE	5.1168e-61	4.09258	0.025	0.002	1.8728e-56	Lymphoid	IKBKE
AC119674.1	5.42095e-60	-3.67241	0.008	0.173	1.98412e-55	Lymphoid	AC119674.1
PPP1R3A	6.818e-60	-4.13353	0.005	0.168	2.49546e-55	Lymphoid	PPP1R3A
PTCHD1-AS	7.09546e-60	-2.94334	0.022	0.197	2.59701e-55	Lymphoid	PTCHD1-AS
HS3ST3B1	7.87898e-60	3.59782	0.036	0.005	2.88378e-55	Lymphoid	HS3ST3B1
CAMK2D	9.3718e-60	-0.984919	0.177	0.425	3.43017e-55	Lymphoid	CAMK2D
EGFR	1.04767e-59	-4.69055	0.006	0.169	3.83458e-55	Lymphoid	EGFR
FAM189A2	1.61633e-59	-4.45452	0.006	0.168	5.91592e-55	Lymphoid	FAM189A2
ZFHX3	2.4104e-59	-2.04194	0.038	0.223	8.82231e-55	Lymphoid	ZFHX3
ANO6	2.7588e-59	-1.42264	0.071	0.275	1.00975e-54	Lymphoid	ANO6
TNNI1	3.85011e-59	-1.59691	0.09	0.297	1.40918e-54	Lymphoid	TNNI1
ISG20	4.03916e-59	3.99808	0.02	0.002	1.47837e-54	Lymphoid	ISG20
AC010894.3	4.82154e-59	1.92562	0.164	0.063	1.76473e-54	Lymphoid	AC010894.3
RASSF1	4.98875e-59	2.78588	0.07	0.016	1.82593e-54	Lymphoid	RASSF1
PEAK1	5.76831e-59	-1.8056	0.05	0.242	2.11126e-54	Lymphoid	PEAK1
LINC00472	5.90146e-59	-4.41757	0.006	0.167	2.15999e-54	Lymphoid	LINC00472
RASGEF1A	6.425e-59	5.31729	0.011	0.001	2.35161e-54	Lymphoid	RASGEF1A
TBC1D8	8.87551e-59	-2.31449	0.018	0.189	3.24853e-54	Lymphoid	TBC1D8
AC090772.2	1.00264e-58	3.79851	0.029	0.003	3.66976e-54	Lymphoid	AC090772.2
HDAC9	1.34761e-58	-1.57519	0.054	0.248	4.93238e-54	Lymphoid	HDAC9
SLC20A2	1.6715e-58	-1.2039	0.078	0.288	6.11787e-54	Lymphoid	SLC20A2
SP110	1.87379e-58	2.19925	0.118	0.038	6.85824e-54	Lymphoid	SP110
RNF150	4.15927e-58	-4.32784	0.007	0.167	1.52233e-53	Lymphoid	RNF150
CKMT2	4.33537e-58	-2.69407	0.019	0.189	1.58679e-53	Lymphoid	CKMT2
FHOD3	4.47105e-58	-3.89034	0.008	0.17	1.63645e-53	Lymphoid	FHOD3
AC092153.1	7.30556e-58	-3.41789	0.008	0.169	2.67391e-53	Lymphoid	AC092153.1
WDFY3	1.29267e-57	-2.52203	0.023	0.194	4.73129e-53	Lymphoid	WDFY3
ASB15	1.68927e-57	-3.99126	0.006	0.164	6.18289e-53	Lymphoid	ASB15
CACNA2D3	1.93363e-57	-4.48116	0.005	0.162	7.07727e-53	Lymphoid	CACNA2D3
LMO7	3.73625e-57	-2.07144	0.03	0.206	1.36751e-52	Lymphoid	LMO7
SOBP	4.08579e-57	-3.5814	0.011	0.171	1.49544e-52	Lymphoid	SOBP
ZNF365	4.09335e-57	4.6012	0.016	0.001	1.49821e-52	Lymphoid	ZNF365
BIRC3	4.41948e-57	3.60499	0.036	0.005	1.61758e-52	Lymphoid	BIRC3
MYH7B	4.81827e-57	-3.65508	0.006	0.164	1.76354e-52	Lymphoid	MYH7B
PDE7A	4.9964e-57	1.6362	0.377	0.254	1.82873e-52	Lymphoid	PDE7A
ADCY7	5.30979e-57	2.30344	0.101	0.03	1.94343e-52	Lymphoid	ADCY7
BAZ2B	8.01788e-57	-1.3444	0.074	0.275	2.93463e-52	Lymphoid	BAZ2B
KBTBD12	1.17046e-56	-5.38719	0.003	0.156	4.284e-52	Lymphoid	KBTBD12
CYTH1	1.30782e-56	2.13949	0.187	0.081	4.78677e-52	Lymphoid	CYTH1
ITIH4	1.83029e-56	-2.27769	0.029	0.203	6.69904e-52	Lymphoid	ITIH4
ARPC2	2.65185e-56	2.13388	0.156	0.061	9.70603e-52	Lymphoid	ARPC2
AC008496.2	3.01773e-56	-5.3712	0.002	0.154	1.10452e-51	Lymphoid	AC008496.2
SYTL2	3.73252e-56	1.74032	0.14	0.05	1.36614e-51	Lymphoid	SYTL2
PRKCQ	5.94527e-56	2.0056	0.253	0.134	2.17603e-51	Lymphoid	PRKCQ
COL4A3	5.99353e-56	-4.53372	0.005	0.159	2.19369e-51	Lymphoid	COL4A3
NXN	7.72181e-56	-3.41535	0.009	0.166	2.82626e-51	Lymphoid	NXN
LHFPL6	8.49268e-56	-4.55553	0.011	0.166	3.1084e-51	Lymphoid	LHFPL6
FGD4	9.93253e-56	-2.58489	0.024	0.191	3.63541e-51	Lymphoid	FGD4
SLC16A10	1.17773e-55	-2.62677	0.017	0.18	4.3106e-51	Lymphoid	SLC16A10
RGS19	1.42043e-55	4.25081	0.02	0.002	5.19891e-51	Lymphoid	RGS19
LAMC1	2.37772e-55	-3.80445	0.01	0.166	8.70271e-51	Lymphoid	LAMC1
PYGM	2.74821e-55	-2.57243	0.02	0.184	1.00587e-50	Lymphoid	PYGM
ERAP2	2.84738e-55	2.60109	0.084	0.023	1.04217e-50	Lymphoid	ERAP2
FRY	3.9683e-55	-1.4251	0.062	0.25	1.45244e-50	Lymphoid	FRY
SYNRG	6.21664e-55	2.13573	0.195	0.088	2.27535e-50	Lymphoid	SYNRG
LMCD1-AS1	7.08264e-55	-3.67091	0.008	0.162	2.59232e-50	Lymphoid	LMCD1-AS1
PLCL2	7.20144e-55	-0.913583	0.226	0.463	2.6358e-50	Lymphoid	PLCL2
TMEM38B	8.00056e-55	-3.02073	0.012	0.169	2.92829e-50	Lymphoid	TMEM38B
CASS4	1.18319e-54	3.49259	0.036	0.005	4.33059e-50	Lymphoid	CASS4
PLPP1	1.43867e-54	-1.5662	0.057	0.243	5.26568e-50	Lymphoid	PLPP1
MYL3	1.4975e-54	-2.1558	0.033	0.203	5.481e-50	Lymphoid	MYL3
UTRN	1.96712e-54	1.16254	0.442	0.316	7.19987e-50	Lymphoid	UTRN
SEPTIN1	1.98106e-54	3.22217	0.049	0.009	7.25086e-50	Lymphoid	SEPTIN1
SYPL2	2.15962e-54	-4.06777	0.005	0.155	7.90444e-50	Lymphoid	SYPL2
STARD13	2.73971e-54	-2.65554	0.021	0.183	1.00276e-49	Lymphoid	STARD13
CDK14	4.1953e-54	-3.03917	0.012	0.167	1.53552e-49	Lymphoid	CDK14
CLIP1	5.14716e-54	-1.37647	0.058	0.245	1.88391e-49	Lymphoid	CLIP1
BTK	6.07132e-54	3.57513	0.029	0.004	2.22216e-49	Lymphoid	BTK
ZNF106	8.87114e-54	-1.3045	0.059	0.245	3.24692e-49	Lymphoid	ZNF106
SYNE2	1.01627e-53	1.59366	0.322	0.194	3.71965e-49	Lymphoid	SYNE2
AIG1	1.08388e-53	-2.68466	0.016	0.174	3.96709e-49	Lymphoid	AIG1
LINC02147	1.40555e-53	2.8394	0.041	0.007	5.14445e-49	Lymphoid	LINC02147
FAM110B	1.88181e-53	-4.04599	0.008	0.158	6.88761e-49	Lymphoid	FAM110B
ABCA6	2.1002e-53	-4.33733	0.006	0.155	7.68693e-49	Lymphoid	ABCA6
TES	2.24632e-53	2.93749	0.052	0.01	8.22177e-49	Lymphoid	TES
SH3BP1	2.87913e-53	3.86783	0.029	0.004	1.05379e-48	Lymphoid	SH3BP1
SSBP2	3.71659e-53	-0.959789	0.107	0.317	1.36031e-48	Lymphoid	SSBP2
BNC2	3.86015e-53	-1.2707	0.078	0.271	1.41285e-48	Lymphoid	BNC2
ROBO1	4.98654e-53	-3.83107	0.01	0.16	1.82512e-48	Lymphoid	ROBO1
STAC3	5.33956e-53	-2.8101	0.018	0.174	1.95433e-48	Lymphoid	STAC3
EZR	6.42737e-53	2.47144	0.074	0.018	2.35248e-48	Lymphoid	EZR
ENAH	7.46124e-53	-2.91407	0.015	0.17	2.73089e-48	Lymphoid	ENAH
MSN	8.32745e-53	2.20018	0.111	0.037	3.04793e-48	Lymphoid	MSN
AMOTL1	8.51482e-53	-3.98367	0.008	0.156	3.11651e-48	Lymphoid	AMOTL1
PRR5L	8.59747e-53	2.9943	0.046	0.008	3.14676e-48	Lymphoid	PRR5L
IMMP2L	9.31256e-53	-0.775458	0.18	0.417	3.40849e-48	Lymphoid	IMMP2L
ZFHX4	9.7646e-53	-3.49161	0.008	0.157	3.57394e-48	Lymphoid	ZFHX4
MT-ND6	1.07038e-52	2.26113	0.119	0.041	3.91769e-48	Lymphoid	MT-ND6
LITAF	1.27054e-52	2.51229	0.061	0.014	4.6503e-48	Lymphoid	LITAF
PRSS23	1.56405e-52	-2.56956	0.015	0.168	5.72459e-48	Lymphoid	PRSS23
SASH1	1.61511e-52	-3.97708	0.008	0.156	5.91145e-48	Lymphoid	SASH1
ELF2	1.99606e-52	-0.957531	0.112	0.325	7.30577e-48	Lymphoid	ELF2
LIMA1	2.27296e-52	-2.03128	0.031	0.196	8.31927e-48	Lymphoid	LIMA1
GPR132	2.47741e-52	3.77169	0.024	0.003	9.06759e-48	Lymphoid	GPR132
FUT8	2.5577e-52	2.02043	0.168	0.071	9.36143e-48	Lymphoid	FUT8
RAP1A	2.96117e-52	1.84775	0.217	0.105	1.08382e-47	Lymphoid	RAP1A
OSBPL6	3.28234e-52	-4.12231	0.008	0.155	1.20137e-47	Lymphoid	OSBPL6
PIM2	3.38381e-52	4.64452	0.012	0.001	1.23851e-47	Lymphoid	PIM2
STK38	3.82898e-52	2.13842	0.163	0.068	1.40144e-47	Lymphoid	STK38
LMOD2	3.92978e-52	-2.87196	0.015	0.168	1.43834e-47	Lymphoid	LMOD2
RPS6KA1	5.33745e-52	3.70531	0.025	0.003	1.95356e-47	Lymphoid	RPS6KA1
ABCA8	5.99339e-52	-3.66273	0.016	0.166	2.19364e-47	Lymphoid	ABCA8
DPF3	6.25489e-52	-2.38385	0.025	0.184	2.28935e-47	Lymphoid	DPF3
FTX	6.46888e-52	-0.534952	0.441	0.711	2.36767e-47	Lymphoid	FTX
CFH	7.86959e-52	-2.84497	0.02	0.175	2.88035e-47	Lymphoid	CFH
CX3CR1	8.02537e-52	3.95508	0.029	0.004	2.93737e-47	Lymphoid	CX3CR1
MGLL	8.40146e-52	-3.68574	0.01	0.157	3.07502e-47	Lymphoid	MGLL
LRRFIP2	9.95892e-52	-1.17072	0.071	0.261	3.64507e-47	Lymphoid	LRRFIP2
DEPTOR	1.06022e-51	-2.70239	0.017	0.17	3.8805e-47	Lymphoid	DEPTOR
CYTOR	1.27522e-51	2.0151	0.103	0.032	4.66744e-47	Lymphoid	CYTOR
NEDD4	1.51989e-51	-2.10642	0.029	0.191	5.56296e-47	Lymphoid	NEDD4
CASK	1.56754e-51	1.90785	0.241	0.127	5.73734e-47	Lymphoid	CASK
PRKAA2	2.31113e-51	-4.09961	0.005	0.148	8.45897e-47	Lymphoid	PRKAA2
MAPT	3.07585e-51	-3.80228	0.007	0.151	1.12579e-46	Lymphoid	MAPT
CLIC5	3.14826e-51	-2.43901	0.025	0.183	1.15229e-46	Lymphoid	CLIC5
RGS9	3.50055e-51	4.01718	0.021	0.002	1.28124e-46	Lymphoid	RGS9
NEGR1	4.06083e-51	-4.43293	0.012	0.157	1.4863e-46	Lymphoid	NEGR1
MBNL1	5.40772e-51	0.752024	0.704	0.655	1.97928e-46	Lymphoid	MBNL1
TNFRSF9	5.59089e-51	5.15753	0.011	0.001	2.04632e-46	Lymphoid	TNFRSF9
C1orf147	5.64305e-51	3.90711	0.021	0.002	2.06541e-46	Lymphoid	C1orf147
SLA2	7.33754e-51	3.88882	0.034	0.005	2.68561e-46	Lymphoid	SLA2
AL139383.1	1.09911e-50	-2.59019	0.015	0.165	4.02285e-46	Lymphoid	AL139383.1
LINC01550	1.28443e-50	3.32848	0.048	0.009	4.70114e-46	Lymphoid	LINC01550
WDPCP	1.32369e-50	-0.948906	0.142	0.357	4.84485e-46	Lymphoid	WDPCP
TMEM161B-AS1	1.33137e-50	-1.7824	0.046	0.215	4.87294e-46	Lymphoid	TMEM161B-AS1
NT5C2	1.39951e-50	-1.05173	0.1	0.3	5.12236e-46	Lymphoid	NT5C2
CSK	1.52484e-50	3.2051	0.046	0.008	5.58108e-46	Lymphoid	CSK
TMCC1	1.78181e-50	-1.01262	0.097	0.297	6.52159e-46	Lymphoid	TMCC1
AL590764.1	1.89488e-50	4.07673	0.018	0.001	6.93545e-46	Lymphoid	AL590764.1
TCF7L2	1.95387e-50	-2.81052	0.019	0.17	7.15137e-46	Lymphoid	TCF7L2
SPTBN1	2.64691e-50	-1.90582	0.067	0.239	9.68796e-46	Lymphoid	SPTBN1
COL15A1	2.84568e-50	-4.44423	0.013	0.156	1.04155e-45	Lymphoid	COL15A1
PTPN14	3.3493e-50	-2.72043	0.014	0.162	1.22588e-45	Lymphoid	PTPN14
LPXN	3.86579e-50	2.51176	0.103	0.033	1.41492e-45	Lymphoid	LPXN
NOVA1	4.25583e-50	-4.52705	0.01	0.151	1.55767e-45	Lymphoid	NOVA1
TRIM14	5.03831e-50	2.9456	0.05	0.01	1.84407e-45	Lymphoid	TRIM14
MYOZ1	5.53256e-50	-3.37526	0.008	0.151	2.02497e-45	Lymphoid	MYOZ1
CORO6	6.28618e-50	-3.15806	0.009	0.152	2.30081e-45	Lymphoid	CORO6
COQ8A	7.46504e-50	-3.11634	0.011	0.156	2.73228e-45	Lymphoid	COQ8A
TPM2	7.66749e-50	-1.35273	0.083	0.273	2.80638e-45	Lymphoid	TPM2
PLA2G4C	1.06651e-49	-4.63283	0.004	0.141	3.90353e-45	Lymphoid	PLA2G4C
CNN2	1.12166e-49	3.47109	0.029	0.004	4.10538e-45	Lymphoid	CNN2
AC009432.2	1.87168e-49	4.92731	0.013	0.001	6.85054e-45	Lymphoid	AC009432.2
TSPAN14	2.05134e-49	2.39697	0.085	0.024	7.50811e-45	Lymphoid	TSPAN14
ANKRD23	3.09062e-49	-1.60053	0.049	0.217	1.1312e-44	Lymphoid	ANKRD23
SPTB	3.15609e-49	-2.29435	0.022	0.174	1.15516e-44	Lymphoid	SPTB
SLC7A2	3.29667e-49	-4.5784	0.004	0.14	1.20662e-44	Lymphoid	SLC7A2
APOBR	3.30692e-49	4.81162	0.013	0.001	1.21037e-44	Lymphoid	APOBR
SLF1	3.42992e-49	2.37827	0.112	0.039	1.25538e-44	Lymphoid	SLF1
NIPAL3	3.66214e-49	3.01201	0.052	0.011	1.34038e-44	Lymphoid	NIPAL3
GREB1L	3.686e-49	-2.5901	0.022	0.171	1.34911e-44	Lymphoid	GREB1L
ALPK2	4.798e-49	-4.45485	0.006	0.143	1.75612e-44	Lymphoid	ALPK2
EIF4E3	5.55442e-49	2.90356	0.071	0.019	2.03297e-44	Lymphoid	EIF4E3
LEPROTL1	5.64909e-49	2.81615	0.063	0.015	2.06762e-44	Lymphoid	LEPROTL1
MACROD2	7.19233e-49	-3.41878	0.012	0.154	2.63246e-44	Lymphoid	MACROD2
SPARCL1	7.38962e-49	-3.1401	0.022	0.168	2.70467e-44	Lymphoid	SPARCL1
CCDC91	8.97413e-49	1.71758	0.27	0.154	3.28462e-44	Lymphoid	CCDC91
CHD3	9.54635e-49	2.4747	0.078	0.022	3.49406e-44	Lymphoid	CHD3
DENND1B	9.81744e-49	2.12454	0.194	0.093	3.59328e-44	Lymphoid	DENND1B
PIK3R6	1.00277e-48	3.54456	0.028	0.004	3.67026e-44	Lymphoid	PIK3R6
EFCAB2	1.03191e-48	-1.8884	0.03	0.186	3.7769e-44	Lymphoid	EFCAB2
COL1A2	1.03767e-48	-2.94229	0.035	0.186	3.79799e-44	Lymphoid	COL1A2
EGF	1.20811e-48	-4.0902	0.006	0.143	4.4218e-44	Lymphoid	EGF
EPB41L2	1.51587e-48	-3.2805	0.013	0.155	5.54824e-44	Lymphoid	EPB41L2
SLC16A7	2.12181e-48	1.88806	0.151	0.062	7.76604e-44	Lymphoid	SLC16A7
DOCK1	2.16719e-48	-4.07201	0.007	0.144	7.93214e-44	Lymphoid	DOCK1
SH2D3C	2.67824e-48	2.13504	0.078	0.022	9.80262e-44	Lymphoid	SH2D3C
RBMS3-AS2	3.09039e-48	-3.74949	0.009	0.147	1.13111e-43	Lymphoid	RBMS3-AS2
DCLK1	3.59288e-48	-4.20547	0.01	0.147	1.31503e-43	Lymphoid	DCLK1
TAPBP	5.28048e-48	2.15524	0.108	0.037	1.93271e-43	Lymphoid	TAPBP
SLC1A3	6.31617e-48	-4.14722	0.005	0.139	2.31178e-43	Lymphoid	SLC1A3
AL353593.1	6.72726e-48	-2.92741	0.009	0.147	2.46224e-43	Lymphoid	AL353593.1
ITGA7	6.84353e-48	-2.85012	0.013	0.154	2.5048e-43	Lymphoid	ITGA7
ADAMTS9-AS2	7.35891e-48	-3.54157	0.013	0.153	2.69344e-43	Lymphoid	ADAMTS9-AS2
CD22	8.79716e-48	4.57745	0.015	0.001	3.21985e-43	Lymphoid	CD22
PFN1	1.02373e-47	2.69566	0.059	0.014	3.74694e-43	Lymphoid	PFN1
TPM3	1.03935e-47	-1.26372	0.111	0.298	3.80412e-43	Lymphoid	TPM3
AC008105.3	1.04697e-47	2.7757	0.062	0.015	3.83202e-43	Lymphoid	AC008105.3
ITGB6	1.07481e-47	-3.8452	0.006	0.14	3.93391e-43	Lymphoid	ITGB6
NFATC3	1.35812e-47	1.78067	0.269	0.157	4.97087e-43	Lymphoid	NFATC3
ACACB	1.65156e-47	-2.00618	0.029	0.181	6.04486e-43	Lymphoid	ACACB
B3GALNT2	1.7926e-47	-1.85443	0.028	0.18	6.56111e-43	Lymphoid	B3GALNT2
ATP1B1	2.27913e-47	-1.98402	0.03	0.182	8.34183e-43	Lymphoid	ATP1B1
PHKG1	2.60008e-47	-2.47377	0.023	0.169	9.51656e-43	Lymphoid	PHKG1
ABCA9	2.65034e-47	-5.17996	0.004	0.136	9.70052e-43	Lymphoid	ABCA9
RALGAPA2	2.75918e-47	-0.933157	0.14	0.347	1.00989e-42	Lymphoid	RALGAPA2
AC244502.1	4.00881e-47	4.28941	0.018	0.002	1.46727e-42	Lymphoid	AC244502.1
ANK1	4.05377e-47	-2.77695	0.011	0.149	1.48372e-42	Lymphoid	ANK1
TENM3	4.55962e-47	-3.37846	0.011	0.148	1.66887e-42	Lymphoid	TENM3
ATP2A1	5.54751e-47	-2.55511	0.035	0.184	2.03044e-42	Lymphoid	ATP2A1
PER3	5.85211e-47	-1.71125	0.042	0.199	2.14193e-42	Lymphoid	PER3
FANCC	6.0033e-47	-1.49879	0.04	0.198	2.19727e-42	Lymphoid	FANCC
PPP2R5C	6.1835e-47	2.01479	0.209	0.106	2.26322e-42	Lymphoid	PPP2R5C
SLC2A3	6.5115e-47	2.31962	0.064	0.016	2.38327e-42	Lymphoid	SLC2A3
OSBPL9	6.82621e-47	-1.13091	0.08	0.261	2.49846e-42	Lymphoid	OSBPL9
PCNX1	8.69653e-47	1.74572	0.25	0.139	3.18302e-42	Lymphoid	PCNX1
KAZN	8.74455e-47	-3.47768	0.018	0.156	3.20059e-42	Lymphoid	KAZN
PLCB2	9.12864e-47	3.24808	0.029	0.004	3.34117e-42	Lymphoid	PLCB2
CA3	9.76349e-47	-1.62992	0.055	0.218	3.57354e-42	Lymphoid	CA3
DLC1	1.19316e-46	-2.79763	0.044	0.194	4.36709e-42	Lymphoid	DLC1
BTBD11	1.41034e-46	3.30459	0.043	0.008	5.16197e-42	Lymphoid	BTBD11
ACTR3	1.43166e-46	2.14609	0.129	0.05	5.24002e-42	Lymphoid	ACTR3
PCNT	1.60175e-46	-1.79739	0.031	0.182	5.86255e-42	Lymphoid	PCNT
RDX	2.18989e-46	-1.6546	0.04	0.196	8.0152e-42	Lymphoid	RDX
DENND5B	2.21714e-46	-2.44684	0.015	0.154	8.11494e-42	Lymphoid	DENND5B
AL136456.1	3.16542e-46	4.29515	0.048	0.01	1.15858e-41	Lymphoid	AL136456.1
YAP1	3.34787e-46	-3.59067	0.007	0.139	1.22535e-41	Lymphoid	YAP1
ABI3BP	3.49491e-46	-3.41496	0.02	0.158	1.27917e-41	Lymphoid	ABI3BP
FAM102A	4.02544e-46	3.04784	0.042	0.008	1.47335e-41	Lymphoid	FAM102A
ABCC5	4.26457e-46	-1.68257	0.034	0.186	1.56087e-41	Lymphoid	ABCC5
ESR1	4.83483e-46	-1.88579	0.03	0.178	1.7696e-41	Lymphoid	ESR1
MIR100HG	4.89695e-46	-3.40291	0.007	0.138	1.79233e-41	Lymphoid	MIR100HG
LGR6	5.17351e-46	4.08576	0.015	0.001	1.89356e-41	Lymphoid	LGR6
LINC01146	5.46891e-46	4.67841	0.013	0.001	2.00168e-41	Lymphoid	LINC01146
STARD4-AS1	5.58216e-46	-2.52081	0.02	0.162	2.04312e-41	Lymphoid	STARD4-AS1
FAM13A	7.38256e-46	-2.08923	0.028	0.174	2.70209e-41	Lymphoid	FAM13A
ARHGAP29	1.0243e-45	-3.8503	0.01	0.142	3.74903e-41	Lymphoid	ARHGAP29
SNHG14	1.03696e-45	-0.692276	0.2	0.427	3.79536e-41	Lymphoid	SNHG14
PRICKLE1	1.26111e-45	-4.15627	0.007	0.137	4.61581e-41	Lymphoid	PRICKLE1
COL6A1	1.49105e-45	-2.7137	0.025	0.166	5.45739e-41	Lymphoid	COL6A1
ACYP2	1.74573e-45	-0.717929	0.137	0.343	6.38955e-41	Lymphoid	ACYP2
DNAJC1	2.17517e-45	1.8354	0.193	0.093	7.96134e-41	Lymphoid	DNAJC1
HSPG2	2.19429e-45	-2.58312	0.029	0.171	8.03134e-41	Lymphoid	HSPG2
MEG8	3.22874e-45	-2.92072	0.027	0.167	1.18175e-40	Lymphoid	MEG8
WIPF3	3.26639e-45	-4.6211	0.003	0.128	1.19553e-40	Lymphoid	WIPF3
TPM1	3.38009e-45	-1.9516	0.05	0.205	1.23715e-40	Lymphoid	TPM1
BMPR1A	3.64193e-45	-1.04573	0.081	0.259	1.33298e-40	Lymphoid	BMPR1A
MRTFB	4.82932e-45	-1.55636	0.043	0.196	1.76758e-40	Lymphoid	MRTFB
LRP8	4.96781e-45	3.96798	0.022	0.003	1.81827e-40	Lymphoid	LRP8
DCAF6	5.27881e-45	-0.962815	0.075	0.251	1.9321e-40	Lymphoid	DCAF6
MYO9A	5.37292e-45	-0.894166	0.116	0.31	1.96654e-40	Lymphoid	MYO9A
ANKRD10	5.54436e-45	-1.07044	0.081	0.257	2.02929e-40	Lymphoid	ANKRD10
USP53	7.32745e-45	-1.5664	0.045	0.2	2.68192e-40	Lymphoid	USP53
UBR3	7.65028e-45	-0.726349	0.111	0.307	2.80008e-40	Lymphoid	UBR3
KLHL24	8.60131e-45	-1.15043	0.058	0.222	3.14817e-40	Lymphoid	KLHL24
ANTXR1	8.82822e-45	-4.4053	0.008	0.135	3.23122e-40	Lymphoid	ANTXR1
PRKY	1.04493e-44	2.07054	0.125	0.048	3.82455e-40	Lymphoid	PRKY
AC022973.3	1.31317e-44	3.46285	0.035	0.006	4.80635e-40	Lymphoid	AC022973.3
AF228727.1	1.61737e-44	4.37554	0.016	0.001	5.91975e-40	Lymphoid	AF228727.1
ARSG	1.67063e-44	2.54751	0.106	0.037	6.11468e-40	Lymphoid	ARSG
ATP10A	1.88625e-44	2.03614	0.118	0.044	6.90388e-40	Lymphoid	ATP10A
PPM1L	2.0245e-44	-1.39962	0.043	0.196	7.40985e-40	Lymphoid	PPM1L
PLAGL1	2.2215e-44	-2.53888	0.03	0.171	8.13093e-40	Lymphoid	PLAGL1
TSHZ2	2.38813e-44	-1.7955	0.048	0.2	8.74081e-40	Lymphoid	TSHZ2
CTSC	2.64506e-44	2.02198	0.097	0.032	9.68117e-40	Lymphoid	CTSC
ADA2	3.0751e-44	2.58253	0.06	0.015	1.12552e-39	Lymphoid	ADA2
AC105402.3	3.23721e-44	3.16536	0.071	0.02	1.18485e-39	Lymphoid	AC105402.3
GRK2	3.74503e-44	2.55533	0.067	0.018	1.37072e-39	Lymphoid	GRK2
LTBP1	3.89826e-44	-4.03573	0.006	0.132	1.4268e-39	Lymphoid	LTBP1
TNFRSF10A	4.53438e-44	3.02068	0.037	0.007	1.65963e-39	Lymphoid	TNFRSF10A
EPHB1	4.97015e-44	-3.10114	0.01	0.139	1.81913e-39	Lymphoid	EPHB1
TAOK3	5.06415e-44	1.70683	0.256	0.148	1.85353e-39	Lymphoid	TAOK3
AUTS2	5.22039e-44	-1.44171	0.091	0.258	1.91071e-39	Lymphoid	AUTS2
CASQ2	6.1008e-44	-2.75959	0.015	0.148	2.23295e-39	Lymphoid	CASQ2
GPATCH8	6.16365e-44	-0.648545	0.167	0.381	2.25596e-39	Lymphoid	GPATCH8
ERN1	6.77625e-44	2.78242	0.067	0.018	2.48017e-39	Lymphoid	ERN1
AP001972.4	7.42217e-44	5.48235	0.011	0.001	2.71659e-39	Lymphoid	AP001972.4
OXNAD1	8.64685e-44	2.13031	0.151	0.066	3.16483e-39	Lymphoid	OXNAD1
FBXO40	8.97973e-44	-5.15026	0.003	0.125	3.28667e-39	Lymphoid	FBXO40
AL135818.1	9.02378e-44	4.59453	0.015	0.001	3.30279e-39	Lymphoid	AL135818.1
INTS6L	1.10772e-43	2.39738	0.071	0.02	4.05437e-39	Lymphoid	INTS6L
HMCN2	1.29806e-43	-3.95639	0.009	0.135	4.75103e-39	Lymphoid	HMCN2
MPDZ	1.35236e-43	-3.72077	0.006	0.129	4.94978e-39	Lymphoid	MPDZ
POU2F2	1.45162e-43	2.74519	0.048	0.01	5.31306e-39	Lymphoid	POU2F2
JPH2	1.57138e-43	-5.0381	0.003	0.124	5.75142e-39	Lymphoid	JPH2
ASB18	1.91312e-43	-4.99666	0.002	0.123	7.0022e-39	Lymphoid	ASB18
SEMA6C	1.98394e-43	-3.2108	0.008	0.133	7.26144e-39	Lymphoid	SEMA6C
ZNF462	2.05357e-43	-3.289	0.006	0.13	7.51628e-39	Lymphoid	ZNF462
ADGRA3	2.10737e-43	-2.55785	0.015	0.146	7.71317e-39	Lymphoid	ADGRA3
NR3C2	3.21377e-43	-0.801291	0.093	0.274	1.17627e-38	Lymphoid	NR3C2
FBN1	3.55954e-43	-3.70425	0.006	0.129	1.30283e-38	Lymphoid	FBN1
RASGRP2	5.03625e-43	3.06313	0.036	0.006	1.84332e-38	Lymphoid	RASGRP2
MITF	5.51554e-43	-1.32171	0.039	0.188	2.01874e-38	Lymphoid	MITF
AC022210.2	6.12132e-43	2.81503	0.062	0.016	2.24046e-38	Lymphoid	AC022210.2
MT-ATP8	6.16968e-43	2.01342	0.135	0.055	2.25816e-38	Lymphoid	MT-ATP8
GPR171	6.79626e-43	4.04609	0.026	0.004	2.4875e-38	Lymphoid	GPR171
ZNF280D	9.21704e-43	-1.08535	0.064	0.226	3.37353e-38	Lymphoid	ZNF280D
LDB2	9.38667e-43	-2.62681	0.035	0.173	3.43561e-38	Lymphoid	LDB2
TBX15	1.03575e-42	-3.96847	0.004	0.125	3.79096e-38	Lymphoid	TBX15
NPAS3	1.14265e-42	-3.40547	0.008	0.131	4.1822e-38	Lymphoid	NPAS3
TSPAN7	1.17369e-42	-3.34091	0.007	0.13	4.29582e-38	Lymphoid	TSPAN7
EPB41	1.51526e-42	2.15224	0.163	0.075	5.546e-38	Lymphoid	EPB41
EXOC6	2.51727e-42	-0.997992	0.105	0.284	9.21347e-38	Lymphoid	EXOC6
NREP	2.61065e-42	-2.68788	0.013	0.14	9.55525e-38	Lymphoid	NREP
TMEM233	2.66671e-42	-3.12518	0.011	0.135	9.76043e-38	Lymphoid	TMEM233
FNDC3B	2.70123e-42	-0.752249	0.137	0.33	9.88676e-38	Lymphoid	FNDC3B
AC092440.1	2.79975e-42	-3.98145	0.003	0.121	1.02474e-37	Lymphoid	AC092440.1
NR2F2-AS1	3.54665e-42	-5.13415	0.004	0.122	1.29811e-37	Lymphoid	NR2F2-AS1
IL17RA	3.89708e-42	2.48812	0.059	0.015	1.42637e-37	Lymphoid	IL17RA
CRYBG1	4.553e-42	2.53987	0.083	0.026	1.66644e-37	Lymphoid	CRYBG1
GTF2IRD1	5.70497e-42	-2.72118	0.013	0.138	2.08808e-37	Lymphoid	GTF2IRD1
STON2	6.84602e-42	-3.5822	0.008	0.129	2.50571e-37	Lymphoid	STON2
DCN	7.20724e-42	-3.45294	0.018	0.145	2.63792e-37	Lymphoid	DCN
NAV3	8.93324e-42	-4.59084	0.007	0.127	3.26966e-37	Lymphoid	NAV3
RASSF2	9.74185e-42	2.96752	0.036	0.007	3.56562e-37	Lymphoid	RASSF2
REV3L	1.07026e-41	-0.582044	0.144	0.345	3.91726e-37	Lymphoid	REV3L
DRAIC	1.16914e-41	3.53939	0.027	0.004	4.27916e-37	Lymphoid	DRAIC
MYH2	1.48293e-41	-3.16584	0.046	0.181	5.42766e-37	Lymphoid	MYH2
AL445259.1	1.49015e-41	-5.14611	0.002	0.118	5.45408e-37	Lymphoid	AL445259.1
GRIP2	2.07806e-41	-3.51223	0.008	0.129	7.60589e-37	Lymphoid	GRIP2
RPL3L	2.33667e-41	-3.57238	0.007	0.126	8.55244e-37	Lymphoid	RPL3L
NCK2	2.56633e-41	2.16383	0.135	0.056	9.39303e-37	Lymphoid	NCK2
ARHGAP10	2.64795e-41	-1.51817	0.048	0.195	9.69175e-37	Lymphoid	ARHGAP10
CENPK	3.33446e-41	3.52037	0.024	0.003	1.22045e-36	Lymphoid	CENPK
TMEM200A	4.07291e-41	3.29534	0.031	0.005	1.49073e-36	Lymphoid	TMEM200A
TJP1	4.56483e-41	-3.39541	0.008	0.128	1.67077e-36	Lymphoid	TJP1
CHD9	5.21806e-41	-0.706242	0.193	0.404	1.90986e-36	Lymphoid	CHD9
THSD4	5.61515e-41	-3.35648	0.011	0.131	2.0552e-36	Lymphoid	THSD4
ARPC1B	6.72148e-41	2.13194	0.084	0.027	2.46013e-36	Lymphoid	ARPC1B
AL138828.1	7.57279e-41	-1.92701	0.028	0.162	2.77172e-36	Lymphoid	AL138828.1
HOMER1	8.37309e-41	-3.17657	0.01	0.13	3.06463e-36	Lymphoid	HOMER1
AC002070.1	1.25325e-40	-2.27488	0.017	0.142	4.58701e-36	Lymphoid	AC002070.1
MAGI2	1.51212e-40	-1.76713	0.036	0.173	5.53451e-36	Lymphoid	MAGI2
TSC22D1	1.57886e-40	-1.43869	0.054	0.202	5.77878e-36	Lymphoid	TSC22D1
ARHGAP21	2.29774e-40	-2.14652	0.028	0.159	8.40995e-36	Lymphoid	ARHGAP21
EVI5	2.4118e-40	-2.49003	0.016	0.14	8.82744e-36	Lymphoid	EVI5
EYA1	2.61591e-40	-4.52713	0.003	0.116	9.57451e-36	Lymphoid	EYA1
TMEM108	2.74357e-40	-2.45288	0.019	0.145	1.00417e-35	Lymphoid	TMEM108
IFI16	3.15042e-40	1.47236	0.171	0.08	1.15308e-35	Lymphoid	IFI16
DENND4A	3.15462e-40	1.67104	0.25	0.148	1.15462e-35	Lymphoid	DENND4A
LAMA4	3.19244e-40	-4.0221	0.009	0.126	1.16846e-35	Lymphoid	LAMA4
ATP2B4	3.3765e-40	1.53027	0.235	0.131	1.23583e-35	Lymphoid	ATP2B4
TLDC2	3.62614e-40	4.56462	0.012	0.001	1.3272e-35	Lymphoid	TLDC2
CKM	4.0455e-40	-1.28444	0.076	0.236	1.48069e-35	Lymphoid	CKM
COL3A1	4.26347e-40	-2.59358	0.04	0.173	1.56047e-35	Lymphoid	COL3A1
MIR193BHG	4.47322e-40	-5.01326	0.002	0.114	1.63724e-35	Lymphoid	MIR193BHG
LIFR	4.75802e-40	-4.48651	0.005	0.119	1.74148e-35	Lymphoid	LIFR
SLC4A8	5.07323e-40	2.96645	0.031	0.005	1.85685e-35	Lymphoid	SLC4A8
CRACR2A	5.2447e-40	2.76717	0.05	0.012	1.91961e-35	Lymphoid	CRACR2A
CBR4	6.68666e-40	-1.28347	0.053	0.2	2.44738e-35	Lymphoid	CBR4
PRMT2	7.44381e-40	1.81918	0.171	0.082	2.72451e-35	Lymphoid	PRMT2
CDKN2A	7.54373e-40	3.86149	0.022	0.003	2.76108e-35	Lymphoid	CDKN2A
AP001011.1	8.05545e-40	1.95393	0.196	0.103	2.94837e-35	Lymphoid	AP001011.1
PTPN6	8.07344e-40	3.44453	0.023	0.003	2.95496e-35	Lymphoid	PTPN6
CPEB4	8.76139e-40	-0.968607	0.06	0.212	3.20675e-35	Lymphoid	CPEB4
TGFB1	8.87072e-40	2.16262	0.113	0.044	3.24677e-35	Lymphoid	TGFB1
LYST	8.9872e-40	1.63726	0.207	0.109	3.28941e-35	Lymphoid	LYST
SBF2	9.0171e-40	-0.730754	0.121	0.3	3.30035e-35	Lymphoid	SBF2
AC083870.1	9.16103e-40	-2.59971	0.013	0.132	3.35303e-35	Lymphoid	AC083870.1
SMYD1	1.02177e-39	-3.74743	0.005	0.119	3.7398e-35	Lymphoid	SMYD1
CMTM1	1.09491e-39	3.2376	0.032	0.005	4.00749e-35	Lymphoid	CMTM1
CTNND1	1.17228e-39	-1.82273	0.035	0.169	4.29064e-35	Lymphoid	CTNND1
TAFA1	1.2175e-39	2.93187	0.06	0.016	4.45617e-35	Lymphoid	TAFA1
CSRP3	1.38836e-39	-1.90523	0.032	0.164	5.08152e-35	Lymphoid	CSRP3
COL6A3	1.4458e-39	-4.28013	0.011	0.127	5.29178e-35	Lymphoid	COL6A3
MYH1	1.56172e-39	-4.1278	0.014	0.132	5.71603e-35	Lymphoid	MYH1
PDE5A	1.74431e-39	-1.35915	0.069	0.221	6.38435e-35	Lymphoid	PDE5A
AC005323.2	1.99803e-39	-3.94734	0.006	0.119	7.313e-35	Lymphoid	AC005323.2
MYO1E	2.18126e-39	-2.85595	0.011	0.129	7.98363e-35	Lymphoid	MYO1E
EBF2	2.5413e-39	-4.16403	0.006	0.119	9.30142e-35	Lymphoid	EBF2
NFIC	2.56131e-39	-1.97124	0.03	0.161	9.37463e-35	Lymphoid	NFIC
PPP1R3C	3.3397e-39	-4.21288	0.004	0.116	1.22236e-34	Lymphoid	PPP1R3C
AC119396.1	3.74236e-39	3.33325	0.036	0.007	1.36974e-34	Lymphoid	AC119396.1
GRK6	3.88517e-39	3.29431	0.028	0.004	1.42201e-34	Lymphoid	GRK6
TRAK1	3.89664e-39	-1.13005	0.046	0.189	1.42621e-34	Lymphoid	TRAK1
ITGAX	4.02093e-39	3.0331	0.031	0.005	1.4717e-34	Lymphoid	ITGAX
FAM214A	4.0712e-39	-0.879303	0.095	0.264	1.4901e-34	Lymphoid	FAM214A
PFKM	5.61816e-39	-2.72495	0.013	0.131	2.0563e-34	Lymphoid	PFKM
CORO7	6.47882e-39	2.31249	0.066	0.019	2.37131e-34	Lymphoid	CORO7
TRIP10	7.7305e-39	-2.72646	0.013	0.131	2.82944e-34	Lymphoid	TRIP10
AC008250.1	8.77067e-39	-5.32763	0.003	0.112	3.21015e-34	Lymphoid	AC008250.1
ARHGAP26	8.82322e-39	1.28176	0.271	0.162	3.22939e-34	Lymphoid	ARHGAP26
NLRP1	8.99694e-39	1.8308	0.124	0.05	3.29297e-34	Lymphoid	NLRP1
MGAT5	9.39502e-39	1.72871	0.135	0.057	3.43867e-34	Lymphoid	MGAT5
BCL2L14	1.40309e-38	-3.76793	0.005	0.116	5.13547e-34	Lymphoid	BCL2L14
UHRF1	1.52015e-38	3.68969	0.02	0.002	5.56392e-34	Lymphoid	UHRF1
PPARGC1A	1.76555e-38	-2.62814	0.007	0.119	6.46208e-34	Lymphoid	PPARGC1A
DAB2IP	2.0602e-38	-3.55833	0.006	0.118	7.54055e-34	Lymphoid	DAB2IP
FRMPD3	2.71876e-38	3.97741	0.017	0.002	9.95093e-34	Lymphoid	FRMPD3
SLFN13	3.07757e-38	3.50699	0.02	0.003	1.12642e-33	Lymphoid	SLFN13
LINC01619	3.08948e-38	2.18527	0.085	0.029	1.13078e-33	Lymphoid	LINC01619
LINC01479	3.94076e-38	-4.1017	0.005	0.114	1.44236e-33	Lymphoid	LINC01479
TNNT3	4.3164e-38	-1.89419	0.069	0.21	1.57985e-33	Lymphoid	TNNT3
S100A4	4.96096e-38	2.19426	0.083	0.027	1.81576e-33	Lymphoid	S100A4
COL4A2	5.93725e-38	-3.92677	0.01	0.122	2.17309e-33	Lymphoid	COL4A2
AC004917.1	8.59829e-38	3.85477	0.032	0.006	3.14706e-33	Lymphoid	AC004917.1
FAM13C	9.01712e-38	-3.63049	0.006	0.115	3.30036e-33	Lymphoid	FAM13C
PLCD4	9.23386e-38	-3.93108	0.004	0.111	3.37969e-33	Lymphoid	PLCD4
ITGAM	9.36464e-38	2.7433	0.043	0.009	3.42755e-33	Lymphoid	ITGAM
FXYD5	1.6787e-37	3.13507	0.03	0.005	6.14421e-33	Lymphoid	FXYD5
GSN	1.69327e-37	-2.2529	0.036	0.164	6.19753e-33	Lymphoid	GSN
GAREM1	1.71311e-37	-2.02133	0.021	0.141	6.27014e-33	Lymphoid	GAREM1
AP002518.2	1.83951e-37	-3.46122	0.007	0.116	6.73279e-33	Lymphoid	AP002518.2
MET	1.86489e-37	-4.56663	0.004	0.111	6.82567e-33	Lymphoid	MET
WWTR1	1.9315e-37	-3.76685	0.007	0.116	7.06949e-33	Lymphoid	WWTR1
CASQ1	2.00556e-37	-2.08773	0.02	0.139	7.34055e-33	Lymphoid	CASQ1
WNK2	2.05914e-37	-3.05521	0.01	0.121	7.53666e-33	Lymphoid	WNK2
TECRL	2.39209e-37	-3.81911	0.006	0.115	8.75531e-33	Lymphoid	TECRL
RASGRP3	2.57075e-37	-2.38692	0.013	0.128	9.4092e-33	Lymphoid	RASGRP3
AC073475.1	2.744e-37	-2.07888	0.02	0.138	1.00433e-32	Lymphoid	AC073475.1
EEPD1	2.76722e-37	-1.82834	0.029	0.154	1.01283e-32	Lymphoid	EEPD1
CD58	2.9693e-37	2.16193	0.101	0.038	1.08679e-32	Lymphoid	CD58
FLNA	4.08738e-37	2.03327	0.089	0.031	1.49602e-32	Lymphoid	FLNA
NIBAN1	4.95577e-37	1.40332	0.209	0.112	1.81386e-32	Lymphoid	NIBAN1
HECTD2	5.161e-37	-3.39004	0.008	0.118	1.88898e-32	Lymphoid	HECTD2
MYOZ3	5.80757e-37	-3.63896	0.006	0.114	2.12563e-32	Lymphoid	MYOZ3
DUSP27	6.5274e-37	-5.19954	0.001	0.105	2.38909e-32	Lymphoid	DUSP27
NKAIN2	8.12412e-37	-3.27438	0.008	0.116	2.97351e-32	Lymphoid	NKAIN2
TRIM55	8.56864e-37	-3.54751	0.006	0.112	3.13621e-32	Lymphoid	TRIM55
TNS1	9.42038e-37	-3.02477	0.012	0.123	3.44795e-32	Lymphoid	TNS1
BCO2	9.78752e-37	-3.46394	0.007	0.114	3.58233e-32	Lymphoid	BCO2
ADAMTS9	1.0222e-36	-3.74464	0.006	0.113	3.74134e-32	Lymphoid	ADAMTS9
CLIC1	1.33336e-36	2.70584	0.035	0.007	4.88023e-32	Lymphoid	CLIC1
TMLHE	1.44998e-36	-1.49428	0.04	0.17	5.30707e-32	Lymphoid	TMLHE
PTPN3	1.50291e-36	-5.99743	0.001	0.104	5.50079e-32	Lymphoid	PTPN3
TNS3	1.91488e-36	-2.58288	0.013	0.124	7.00866e-32	Lymphoid	TNS3
TMEM182	1.94134e-36	-2.01935	0.019	0.135	7.10551e-32	Lymphoid	TMEM182
AC005237.1	1.99822e-36	-2.96803	0.011	0.121	7.31368e-32	Lymphoid	AC005237.1
TCF7	2.23853e-36	2.82885	0.065	0.019	8.19324e-32	Lymphoid	TCF7
MYOZ2	2.34861e-36	-3.98748	0.005	0.11	8.59616e-32	Lymphoid	MYOZ2
MEG3	2.42246e-36	-2.16387	0.07	0.205	8.86645e-32	Lymphoid	MEG3
UBE2G1	2.44813e-36	-1.0352	0.073	0.222	8.96039e-32	Lymphoid	UBE2G1
NEK10	2.74836e-36	-3.723	0.008	0.114	1.00593e-31	Lymphoid	NEK10
ALOX5	2.91144e-36	2.60631	0.05	0.012	1.06562e-31	Lymphoid	ALOX5
REEP1	3.49562e-36	-2.92038	0.009	0.117	1.27943e-31	Lymphoid	REEP1
IFITM1	4.78319e-36	3.1245	0.023	0.003	1.7507e-31	Lymphoid	IFITM1
HIPK3	4.88189e-36	-1.16874	0.055	0.192	1.78682e-31	Lymphoid	HIPK3
KCNQ1	5.00556e-36	2.59233	0.06	0.017	1.83209e-31	Lymphoid	KCNQ1
SMPX	5.49705e-36	-2.8377	0.009	0.117	2.01198e-31	Lymphoid	SMPX
ST5	6.01093e-36	-3.01431	0.007	0.112	2.20006e-31	Lymphoid	ST5
HSDL2	6.02042e-36	-1.48691	0.027	0.148	2.20353e-31	Lymphoid	HSDL2
MYOF	6.20293e-36	-3.68929	0.008	0.114	2.27034e-31	Lymphoid	MYOF
MAP3K20-AS1	6.3107e-36	-2.83985	0.008	0.115	2.30978e-31	Lymphoid	MAP3K20-AS1
MBP	7.26938e-36	1.68076	0.242	0.146	2.66067e-31	Lymphoid	MBP
DIP2C	8.16906e-36	-0.857044	0.062	0.206	2.98996e-31	Lymphoid	DIP2C
LMOD3	8.3669e-36	-1.93457	0.02	0.135	3.06237e-31	Lymphoid	LMOD3
TNKS2	9.95338e-36	-0.831408	0.081	0.234	3.64304e-31	Lymphoid	TNKS2
CLCN5	1.2134e-35	-2.72996	0.016	0.127	4.44118e-31	Lymphoid	CLCN5
PLEK	1.33038e-35	2.63584	0.033	0.006	4.86932e-31	Lymphoid	PLEK
TRAF5	1.61344e-35	2.22671	0.069	0.022	5.90536e-31	Lymphoid	TRAF5
AC010680.1	1.6541e-35	-3.56487	0.005	0.108	6.05417e-31	Lymphoid	AC010680.1
AC020687.1	1.96358e-35	-5.79846	0.002	0.102	7.18692e-31	Lymphoid	AC020687.1
PCMTD1	2.32468e-35	-0.884441	0.071	0.218	8.50856e-31	Lymphoid	PCMTD1
GNG12-AS1	2.36047e-35	-3.83424	0.006	0.109	8.63957e-31	Lymphoid	GNG12-AS1
DIAPH2	2.39094e-35	-0.563128	0.2	0.392	8.75106e-31	Lymphoid	DIAPH2
PDCD4	2.44635e-35	1.92164	0.13	0.057	8.95387e-31	Lymphoid	PDCD4
WSB1	2.49544e-35	-0.905682	0.096	0.252	9.13355e-31	Lymphoid	WSB1
UGGT2	2.65266e-35	-2.62632	0.014	0.123	9.70901e-31	Lymphoid	UGGT2
GULP1	2.73828e-35	-4.44003	0.003	0.103	1.00224e-30	Lymphoid	GULP1
TTC13	2.92541e-35	2.22418	0.091	0.033	1.07073e-30	Lymphoid	TTC13
VPS8	3.70542e-35	-0.692876	0.12	0.29	1.35622e-30	Lymphoid	VPS8
AL589990.1	3.95958e-35	3.73222	0.023	0.003	1.44925e-30	Lymphoid	AL589990.1
G3BP2	4.14772e-35	-1.2126	0.042	0.171	1.51811e-30	Lymphoid	G3BP2
LINC01237	5.12224e-35	2.71896	0.036	0.008	1.87479e-30	Lymphoid	LINC01237
CYB5R1	5.34937e-35	-2.35748	0.008	0.113	1.95792e-30	Lymphoid	CYB5R1
SARAF	5.40394e-35	2.2796	0.083	0.029	1.9779e-30	Lymphoid	SARAF
CYTH4	5.84172e-35	2.64245	0.036	0.008	2.13813e-30	Lymphoid	CYTH4
RYR3	6.08596e-35	-1.50256	0.037	0.161	2.22752e-30	Lymphoid	RYR3
SULF1	6.52468e-35	-5.00182	0.004	0.103	2.3881e-30	Lymphoid	SULF1
MYBPC2	7.21841e-35	-4.33136	0.007	0.109	2.64201e-30	Lymphoid	MYBPC2
AC093879.1	7.70906e-35	-4.33747	0.004	0.103	2.82159e-30	Lymphoid	AC093879.1
KCND2	7.91376e-35	-4.35207	0.007	0.109	2.89651e-30	Lymphoid	KCND2
LINC00882	8.69265e-35	-4.0721	0.007	0.109	3.1816e-30	Lymphoid	LINC00882
SOX5	9.11741e-35	-3.06768	0.011	0.116	3.33706e-30	Lymphoid	SOX5
FXR1	9.45252e-35	-0.871095	0.07	0.215	3.45972e-30	Lymphoid	FXR1
RTN4	1.05117e-34	-0.813479	0.091	0.245	3.84739e-30	Lymphoid	RTN4
NEO1	1.07807e-34	-1.73071	0.026	0.142	3.94583e-30	Lymphoid	NEO1
ACSS2	1.08912e-34	-2.45236	0.011	0.116	3.98629e-30	Lymphoid	ACSS2
SLC8A3	1.45001e-34	-0.744401	0.039	0.166	5.30717e-30	Lymphoid	SLC8A3
SCN4A	1.48289e-34	-3.43373	0.006	0.108	5.42752e-30	Lymphoid	SCN4A
HSPB8	1.49446e-34	-3.45129	0.005	0.105	5.46987e-30	Lymphoid	HSPB8
SLC49A4	1.6238e-34	-1.50494	0.034	0.155	5.94327e-30	Lymphoid	SLC49A4
FERMT3	1.72122e-34	2.69389	0.044	0.011	6.29982e-30	Lymphoid	FERMT3
DPH6	1.90204e-34	-1.03275	0.059	0.195	6.96166e-30	Lymphoid	DPH6
CAND2	1.97287e-34	-4.07652	0.004	0.102	7.22089e-30	Lymphoid	CAND2
PLPP3	2.13506e-34	-4.42695	0.004	0.103	7.81452e-30	Lymphoid	PLPP3
IFNAR2	2.14908e-34	1.68401	0.151	0.073	7.86584e-30	Lymphoid	IFNAR2
FAM117A	2.28523e-34	2.47031	0.057	0.016	8.36419e-30	Lymphoid	FAM117A
IGFBP5	2.97213e-34	-2.78898	0.015	0.121	1.08783e-29	Lymphoid	IGFBP5
LRRC8C	3.62117e-34	1.76849	0.103	0.04	1.32539e-29	Lymphoid	LRRC8C
SH3PXD2A	3.75986e-34	-2.53089	0.012	0.117	1.37615e-29	Lymphoid	SH3PXD2A
A2M	3.84627e-34	1.18641	0.259	0.156	1.40777e-29	Lymphoid	A2M
GAB3	4.23751e-34	2.24032	0.067	0.021	1.55097e-29	Lymphoid	GAB3
TRPV2	4.92014e-34	3.11311	0.035	0.007	1.80082e-29	Lymphoid	TRPV2
EPS8	5.89223e-34	-3.85623	0.008	0.108	2.15662e-29	Lymphoid	EPS8
IL32	6.26031e-34	2.11405	0.111	0.046	2.29134e-29	Lymphoid	IL32
PARP4	6.31833e-34	1.85649	0.148	0.071	2.31257e-29	Lymphoid	PARP4
PAQR5	6.33917e-34	3.92318	0.013	0.001	2.3202e-29	Lymphoid	PAQR5
FOXP1	7.35798e-34	1.11746	0.442	0.372	2.69309e-29	Lymphoid	FOXP1
OPHN1	7.49709e-34	-2.01486	0.024	0.136	2.74401e-29	Lymphoid	OPHN1
EPM2A	7.94167e-34	-2.22777	0.013	0.119	2.90673e-29	Lymphoid	EPM2A
C1orf56	8.75664e-34	2.24636	0.096	0.037	3.20502e-29	Lymphoid	C1orf56
PTPRK	9.45852e-34	-0.951399	0.067	0.204	3.46191e-29	Lymphoid	PTPRK
RNF217-AS1	1.06363e-33	-6.01386	0.001	0.096	3.89299e-29	Lymphoid	RNF217-AS1
COL14A1	1.08501e-33	-5.44713	0.003	0.098	3.97125e-29	Lymphoid	COL14A1
SIK2	1.29606e-33	-1.04734	0.067	0.204	4.74371e-29	Lymphoid	SIK2
DES	1.3662e-33	-1.6693	0.036	0.156	5.00041e-29	Lymphoid	DES
PRKD1	1.64779e-33	-3.40169	0.007	0.106	6.03106e-29	Lymphoid	PRKD1
GRB10	1.71502e-33	-1.78246	0.023	0.134	6.27716e-29	Lymphoid	GRB10
ZNF438	1.75134e-33	-1.06871	0.053	0.183	6.41006e-29	Lymphoid	ZNF438
PSD3	2.02367e-33	-3.28002	0.01	0.11	7.40682e-29	Lymphoid	PSD3
GIMAP5	2.21818e-33	2.51628	0.042	0.01	8.11877e-29	Lymphoid	GIMAP5
DOK5	2.32771e-33	-4.87141	0.003	0.098	8.51965e-29	Lymphoid	DOK5
FRAS1	2.81015e-33	-5.57433	0.002	0.096	1.02854e-28	Lymphoid	FRAS1
PFKFB1	3.12902e-33	-3.45042	0.006	0.104	1.14525e-28	Lymphoid	PFKFB1
ZNF704	3.95316e-33	-2.0582	0.025	0.135	1.4469e-28	Lymphoid	ZNF704
ZNF532	4.19195e-33	-2.04231	0.018	0.124	1.5343e-28	Lymphoid	ZNF532
HDAC4	4.25577e-33	-0.884366	0.081	0.225	1.55766e-28	Lymphoid	HDAC4
DAG1	4.75301e-33	-2.31794	0.021	0.129	1.73965e-28	Lymphoid	DAG1
MICAL3	5.13836e-33	-1.34432	0.034	0.151	1.88069e-28	Lymphoid	MICAL3
ROR1	5.94069e-33	-3.2024	0.01	0.109	2.17435e-28	Lymphoid	ROR1
ELOVL5	6.68098e-33	1.94289	0.084	0.03	2.4453e-28	Lymphoid	ELOVL5
ART3	7.03615e-33	-3.60077	0.005	0.101	2.5753e-28	Lymphoid	ART3
RAP1GDS1	7.6486e-33	1.69477	0.179	0.095	2.79947e-28	Lymphoid	RAP1GDS1
MPV17	8.82508e-33	-2.87021	0.012	0.113	3.23007e-28	Lymphoid	MPV17
NEDD4L	1.14914e-32	-2.85397	0.01	0.109	4.20598e-28	Lymphoid	NEDD4L
ZNF638	1.1751e-32	-0.543112	0.177	0.362	4.30098e-28	Lymphoid	ZNF638
MAMSTR	1.20859e-32	-3.07841	0.006	0.103	4.42356e-28	Lymphoid	MAMSTR
GIMAP2	1.38736e-32	3.07139	0.025	0.004	5.07786e-28	Lymphoid	GIMAP2
PHKA1	1.40822e-32	-4.23574	0.005	0.099	5.15421e-28	Lymphoid	PHKA1
ACSL5	1.41939e-32	2.68376	0.04	0.009	5.19512e-28	Lymphoid	ACSL5
FNIP1	1.46176e-32	-0.760609	0.093	0.242	5.3502e-28	Lymphoid	FNIP1
MYL2	1.79779e-32	-0.972422	0.129	0.288	6.5801e-28	Lymphoid	MYL2
TNXB	1.91649e-32	-3.25271	0.01	0.107	7.01454e-28	Lymphoid	TNXB
AAK1	2.03917e-32	1.25142	0.357	0.272	7.46358e-28	Lymphoid	AAK1
XYLT1	2.19013e-32	1.77339	0.13	0.059	8.0161e-28	Lymphoid	XYLT1
PPARGC1B	2.55633e-32	-2.92296	0.008	0.106	9.35643e-28	Lymphoid	PPARGC1B
CYSTM1	2.63089e-32	-0.765172	0.074	0.213	9.62932e-28	Lymphoid	CYSTM1
UGP2	2.79182e-32	-1.07734	0.076	0.213	1.02183e-27	Lymphoid	UGP2
ATP1B4	2.98357e-32	-2.9189	0.006	0.1	1.09201e-27	Lymphoid	ATP1B4
VPS13A	3.07901e-32	-0.641597	0.088	0.234	1.12695e-27	Lymphoid	VPS13A
NFIX	3.15178e-32	-2.53958	0.014	0.115	1.15358e-27	Lymphoid	NFIX
EBF3	3.66063e-32	-3.20922	0.008	0.105	1.33983e-27	Lymphoid	EBF3
IRF1	3.84723e-32	2.55891	0.056	0.016	1.40812e-27	Lymphoid	IRF1
PRDM1	3.87615e-32	2.84745	0.031	0.006	1.41871e-27	Lymphoid	PRDM1
PREX2	4.00808e-32	-4.05302	0.006	0.101	1.467e-27	Lymphoid	PREX2
CATSPERB	4.37087e-32	2.52743	0.046	0.012	1.59978e-27	Lymphoid	CATSPERB
LINC02384	4.39825e-32	3.30494	0.026	0.005	1.6098e-27	Lymphoid	LINC02384
ZNF521	4.71463e-32	-1.98461	0.026	0.134	1.7256e-27	Lymphoid	ZNF521
LINC02591	4.8214e-32	3.52439	0.019	0.003	1.76468e-27	Lymphoid	LINC02591
PLXNA2	5.04937e-32	-2.60606	0.009	0.106	1.84812e-27	Lymphoid	PLXNA2
PLCB1	5.10017e-32	-0.580177	0.144	0.308	1.86671e-27	Lymphoid	PLCB1
ACSL1	5.38489e-32	-1.71176	0.021	0.127	1.97092e-27	Lymphoid	ACSL1
TMEM178B	5.65336e-32	-4.0911	0.004	0.095	2.06919e-27	Lymphoid	TMEM178B
PID1	5.75523e-32	-4.56802	0.005	0.098	2.10647e-27	Lymphoid	PID1
MYH9	5.94004e-32	1.58047	0.153	0.075	2.17411e-27	Lymphoid	MYH9
RNF144B	6.65593e-32	-3.43627	0.006	0.099	2.43614e-27	Lymphoid	RNF144B
NCKAP1	6.83556e-32	-2.13424	0.018	0.12	2.50188e-27	Lymphoid	NCKAP1
ATP6V0A1	7.51525e-32	-2.25133	0.012	0.111	2.75066e-27	Lymphoid	ATP6V0A1
FLNC	8.4433e-32	-1.62394	0.024	0.131	3.09033e-27	Lymphoid	FLNC
FCHO2	9.35621e-32	-2.19149	0.015	0.116	3.42447e-27	Lymphoid	FCHO2
FGGY	1.22763e-31	-1.03456	0.051	0.175	4.49326e-27	Lymphoid	FGGY
NAV2	1.2404e-31	-2.42893	0.022	0.126	4.53999e-27	Lymphoid	NAV2
PRUNE2	1.4806e-31	-2.78183	0.012	0.109	5.41913e-27	Lymphoid	PRUNE2
ME1	1.53658e-31	-3.22129	0.007	0.101	5.62402e-27	Lymphoid	ME1
CLCN1	1.63072e-31	-5.26844	0.001	0.09	5.96859e-27	Lymphoid	CLCN1
ENO3	1.65957e-31	-1.96086	0.025	0.132	6.07418e-27	Lymphoid	ENO3
ZEB1	1.98268e-31	-0.539557	0.193	0.377	7.25681e-27	Lymphoid	ZEB1
MACROD1	2.07308e-31	-3.21226	0.006	0.099	7.58767e-27	Lymphoid	MACROD1
SACM1L	2.07964e-31	2.04307	0.104	0.043	7.61168e-27	Lymphoid	SACM1L
AR	2.08745e-31	-4.08427	0.004	0.094	7.64027e-27	Lymphoid	AR
HIBADH	2.14382e-31	-1.16528	0.039	0.155	7.84661e-27	Lymphoid	HIBADH
RPS6KA5	2.21582e-31	1.80586	0.179	0.098	8.11013e-27	Lymphoid	RPS6KA5
TGFB2	2.3491e-31	-4.2087	0.003	0.093	8.59793e-27	Lymphoid	TGFB2
COL6A2	2.51565e-31	-2.32589	0.024	0.128	9.20752e-27	Lymphoid	COL6A2
TPM4	2.59706e-31	2.02826	0.065	0.021	9.5055e-27	Lymphoid	TPM4
HNF1A-AS1	2.67545e-31	-4.13887	0.004	0.094	9.79242e-27	Lymphoid	HNF1A-AS1
SRRM2	2.86129e-31	-0.525214	0.107	0.261	1.04726e-26	Lymphoid	SRRM2
GADL1	2.99507e-31	-3.59796	0.004	0.093	1.09622e-26	Lymphoid	GADL1
ANTXR2	3.01438e-31	1.55285	0.16	0.081	1.10329e-26	Lymphoid	ANTXR2
CDK6	3.23793e-31	1.26606	0.17	0.087	1.18512e-26	Lymphoid	CDK6
PLCB4	3.24181e-31	-3.5932	0.008	0.101	1.18653e-26	Lymphoid	PLCB4
ABCA5	3.53209e-31	-0.761897	0.081	0.22	1.29278e-26	Lymphoid	ABCA5
RUSC2	3.53442e-31	-2.22476	0.013	0.11	1.29363e-26	Lymphoid	RUSC2
CNOT6L	3.58912e-31	1.88215	0.15	0.075	1.31365e-26	Lymphoid	CNOT6L
DEGS2	3.83246e-31	3.51	0.02	0.003	1.40272e-26	Lymphoid	DEGS2
RGS14	3.84493e-31	3.50096	0.023	0.004	1.40728e-26	Lymphoid	RGS14
MIPOL1	3.87199e-31	-3.36948	0.008	0.101	1.41719e-26	Lymphoid	MIPOL1
PGM5	4.19038e-31	-4.80467	0.003	0.092	1.53372e-26	Lymphoid	PGM5
HADHB	4.56918e-31	-1.28322	0.039	0.153	1.67236e-26	Lymphoid	HADHB
SMAD1	5.16415e-31	-3.55483	0.006	0.098	1.89013e-26	Lymphoid	SMAD1
ABLIM1	5.43875e-31	-1.26319	0.078	0.207	1.99064e-26	Lymphoid	ABLIM1
LINC00278	5.45595e-31	1.51661	0.124	0.055	1.99693e-26	Lymphoid	LINC00278
AC019068.1	5.98533e-31	-5.08435	0.001	0.089	2.19069e-26	Lymphoid	AC019068.1
KLF12	6.38148e-31	1.34197	0.326	0.24	2.33569e-26	Lymphoid	KLF12
GALNT17	6.57046e-31	-2.98984	0.008	0.1	2.40485e-26	Lymphoid	GALNT17
ARHGAP28	6.75954e-31	-3.59217	0.006	0.096	2.47406e-26	Lymphoid	ARHGAP28
SLC16A6	6.81705e-31	3.47484	0.028	0.005	2.49511e-26	Lymphoid	SLC16A6
CAVIN4	7.42347e-31	-3.78556	0.004	0.094	2.71706e-26	Lymphoid	CAVIN4
HMCN1	8.31268e-31	-3.91793	0.006	0.096	3.04253e-26	Lymphoid	HMCN1
SNX1	8.40712e-31	-0.851161	0.062	0.191	3.07709e-26	Lymphoid	SNX1
ANKRD13D	8.96649e-31	2.16899	0.067	0.022	3.28182e-26	Lymphoid	ANKRD13D
ROCK2	8.98179e-31	-0.68334	0.081	0.219	3.28743e-26	Lymphoid	ROCK2
TTLL11	9.31746e-31	-2.02229	0.018	0.118	3.41029e-26	Lymphoid	TTLL11
IVNS1ABP	1.05851e-30	2.30359	0.068	0.023	3.87425e-26	Lymphoid	IVNS1ABP
LINC01943	1.18112e-30	3.08467	0.024	0.004	4.32302e-26	Lymphoid	LINC01943
CMTM7	1.20758e-30	2.13621	0.074	0.026	4.41986e-26	Lymphoid	CMTM7
MTRNR2L8	1.21453e-30	2.13147	0.123	0.056	4.44531e-26	Lymphoid	MTRNR2L8
OSBPL1A	1.4161e-30	-1.91252	0.02	0.12	5.18307e-26	Lymphoid	OSBPL1A
MIRLET7BHG	1.447e-30	-2.23041	0.018	0.118	5.29617e-26	Lymphoid	MIRLET7BHG
CPEB3	1.60383e-30	-1.01136	0.048	0.166	5.87016e-26	Lymphoid	CPEB3
COLQ	1.62036e-30	-1.56721	0.021	0.123	5.93066e-26	Lymphoid	COLQ
COL4A1	1.67883e-30	-5.37055	0.003	0.09	6.14468e-26	Lymphoid	COL4A1
MR1	1.75596e-30	2.50125	0.043	0.011	6.42699e-26	Lymphoid	MR1
PDLIM7	1.83926e-30	-2.11754	0.017	0.115	6.73187e-26	Lymphoid	PDLIM7
SRGAP1	1.90172e-30	-3.17204	0.011	0.104	6.96048e-26	Lymphoid	SRGAP1
DPYD	2.93669e-30	0.968581	0.421	0.341	1.07486e-25	Lymphoid	DPYD
CD4	3.25246e-30	2.51353	0.039	0.009	1.19043e-25	Lymphoid	CD4
LYPLAL1	3.2586e-30	-1.28506	0.036	0.148	1.19268e-25	Lymphoid	LYPLAL1
PGM1	3.41125e-30	-1.87652	0.018	0.116	1.24855e-25	Lymphoid	PGM1
PGGHG	3.41786e-30	2.83257	0.033	0.007	1.25097e-25	Lymphoid	PGGHG
COL4A4	3.5319e-30	-2.82178	0.007	0.097	1.29271e-25	Lymphoid	COL4A4
NOS1	3.95706e-30	-3.47753	0.004	0.092	1.44832e-25	Lymphoid	NOS1
GPAT3	4.31602e-30	-1.72158	0.022	0.123	1.57971e-25	Lymphoid	GPAT3
SLC2A4	4.83648e-30	-3.34787	0.006	0.094	1.7702e-25	Lymphoid	SLC2A4
CRYBG3	5.02349e-30	-1.93046	0.02	0.12	1.83865e-25	Lymphoid	CRYBG3
AC008014.1	5.05224e-30	-0.833008	0.078	0.21	1.84917e-25	Lymphoid	AC008014.1
ZNF423	5.96731e-30	-4.53732	0.003	0.089	2.1841e-25	Lymphoid	ZNF423
ACADVL	6.0925e-30	-1.33367	0.035	0.145	2.22992e-25	Lymphoid	ACADVL
SORT1	6.28348e-30	-2.87144	0.008	0.098	2.29982e-25	Lymphoid	SORT1
IFFO2	6.97085e-30	2.87011	0.029	0.006	2.5514e-25	Lymphoid	IFFO2
EFTUD2	7.07565e-30	-2.02462	0.02	0.12	2.58976e-25	Lymphoid	EFTUD2
CLSTN2	7.08166e-30	-3.1585	0.008	0.097	2.59196e-25	Lymphoid	CLSTN2
ABCA9-AS1	7.08215e-30	-6.50504	0.001	0.084	2.59214e-25	Lymphoid	ABCA9-AS1
ZHX3	9.07741e-30	-1.56725	0.028	0.132	3.32242e-25	Lymphoid	ZHX3
LINC01588	9.41005e-30	2.56573	0.067	0.022	3.44417e-25	Lymphoid	LINC01588
SLC25A12	1.03662e-29	-0.776929	0.083	0.218	3.79412e-25	Lymphoid	SLC25A12
JAZF1	1.06739e-29	1.44023	0.24	0.153	3.90677e-25	Lymphoid	JAZF1
PTPRD	1.0732e-29	-2.79698	0.008	0.098	3.928e-25	Lymphoid	PTPRD
PDGFC	1.07473e-29	-3.34366	0.005	0.092	3.93363e-25	Lymphoid	PDGFC
FAM172A	1.1678e-29	1.28863	0.307	0.22	4.27425e-25	Lymphoid	FAM172A
VEGFA	1.1878e-29	-1.92909	0.011	0.104	4.34747e-25	Lymphoid	VEGFA
ZNF101	1.19148e-29	3.22996	0.027	0.005	4.36094e-25	Lymphoid	ZNF101
TNNI2	1.1934e-29	-2.05537	0.034	0.139	4.36795e-25	Lymphoid	TNNI2
LINC02752	1.55153e-29	3.90041	0.018	0.002	5.67875e-25	Lymphoid	LINC02752
COBL	1.72469e-29	-2.63528	0.01	0.1	6.31255e-25	Lymphoid	COBL
ACTR2	1.96722e-29	1.88447	0.132	0.064	7.20024e-25	Lymphoid	ACTR2
SPRY1	2.05186e-29	-3.36422	0.006	0.093	7.51002e-25	Lymphoid	SPRY1
RASSF3	2.30052e-29	1.74987	0.108	0.047	8.42015e-25	Lymphoid	RASSF3
ABCB1	2.41934e-29	2.48756	0.032	0.007	8.85504e-25	Lymphoid	ABCB1
MFSD6	2.48285e-29	1.84923	0.083	0.032	9.08747e-25	Lymphoid	MFSD6
AP003025.2	2.5733e-29	3.70985	0.017	0.002	9.41853e-25	Lymphoid	AP003025.2
RBM20	2.72908e-29	-3.40973	0.005	0.091	9.98871e-25	Lymphoid	RBM20
AP005329.2	3.20546e-29	-3.17933	0.006	0.092	1.17323e-24	Lymphoid	AP005329.2
RERE	5.15076e-29	-0.396655	0.214	0.407	1.88523e-24	Lymphoid	RERE
COLEC12	5.76355e-29	-4.07846	0.006	0.092	2.10952e-24	Lymphoid	COLEC12
AP000919.2	6.14818e-29	3.08057	0.029	0.006	2.25029e-24	Lymphoid	AP000919.2
ROBO2	6.73433e-29	-4.52916	0.008	0.094	2.46483e-24	Lymphoid	ROBO2
AL008633.1	6.80632e-29	-3.12952	0.006	0.092	2.49118e-24	Lymphoid	AL008633.1
RAP1B	7.51015e-29	1.47595	0.192	0.11	2.74879e-24	Lymphoid	RAP1B
SLN	7.69273e-29	-1.92919	0.019	0.114	2.81562e-24	Lymphoid	SLN
ITIH6	9.21165e-29	-3.88556	0.003	0.085	3.37156e-24	Lymphoid	ITIH6
MME	9.86001e-29	-4.20175	0.005	0.089	3.60886e-24	Lymphoid	MME
PIR	9.88845e-29	-4.72974	0.001	0.083	3.61927e-24	Lymphoid	PIR
TRAPPC10	1.00166e-28	1.94313	0.111	0.05	3.66617e-24	Lymphoid	TRAPPC10
AC090403.1	1.01919e-28	-2.86473	0.006	0.091	3.73032e-24	Lymphoid	AC090403.1
TRANK1	1.03146e-28	1.84108	0.077	0.028	3.77524e-24	Lymphoid	TRANK1
GLIS3	1.15281e-28	-3.48239	0.008	0.094	4.2194e-24	Lymphoid	GLIS3
PLIN5	1.17125e-28	-3.52835	0.004	0.087	4.28689e-24	Lymphoid	PLIN5
BIN1	1.44035e-28	-1.76537	0.022	0.12	5.27181e-24	Lymphoid	BIN1
LAMB1	1.48983e-28	-3.49963	0.008	0.095	5.45292e-24	Lymphoid	LAMB1
SMOC2	1.54866e-28	-4.02116	0.006	0.091	5.66826e-24	Lymphoid	SMOC2
UBASH3B	1.62575e-28	1.94118	0.055	0.017	5.9504e-24	Lymphoid	UBASH3B
ATP2B1	1.78367e-28	1.81034	0.2	0.12	6.5284e-24	Lymphoid	ATP2B1
RUFY3	1.90601e-28	-1.03817	0.055	0.17	6.97618e-24	Lymphoid	RUFY3
CALCRL	1.99437e-28	-4.05601	0.008	0.094	7.29961e-24	Lymphoid	CALCRL
CMIP	2.22116e-28	1.46352	0.137	0.066	8.12968e-24	Lymphoid	CMIP
RPL28	2.26544e-28	1.6992	0.081	0.031	8.29174e-24	Lymphoid	RPL28
HOMER2	2.2714e-28	-1.52567	0.015	0.108	8.31357e-24	Lymphoid	HOMER2
MEOX2	2.63526e-28	-4.30395	0.004	0.085	9.64533e-24	Lymphoid	MEOX2
GPI	2.65623e-28	-1.23517	0.039	0.145	9.72207e-24	Lymphoid	GPI
USO1	2.66816e-28	-0.765573	0.07	0.195	9.76572e-24	Lymphoid	USO1
LINC01473	2.80103e-28	-0.588012	0.069	0.194	1.02521e-23	Lymphoid	LINC01473
PKIA	2.99988e-28	-1.15333	0.029	0.131	1.09798e-23	Lymphoid	PKIA
COL1A1	3.31901e-28	-2.38956	0.03	0.128	1.21479e-23	Lymphoid	COL1A1
PCSK7	3.47057e-28	1.98548	0.124	0.059	1.27026e-23	Lymphoid	PCSK7
RNF217	3.55294e-28	-2.93106	0.007	0.092	1.30041e-23	Lymphoid	RNF217
GPR68	3.97192e-28	3.07872	0.032	0.007	1.45376e-23	Lymphoid	GPR68
TCEA3	4.22665e-28	-2.161	0.014	0.104	1.547e-23	Lymphoid	TCEA3
SVEP1	4.27992e-28	-6.20372	0.001	0.081	1.5665e-23	Lymphoid	SVEP1
AHNAK	4.33553e-28	1.45753	0.196	0.115	1.58685e-23	Lymphoid	AHNAK
ECPAS	4.45125e-28	-0.758034	0.069	0.192	1.6292e-23	Lymphoid	ECPAS
TRMT11	4.54331e-28	-1.01839	0.044	0.154	1.6629e-23	Lymphoid	TRMT11
GBP3	4.56875e-28	2.42311	0.039	0.01	1.67221e-23	Lymphoid	GBP3
TRIM22	4.73766e-28	1.82062	0.102	0.044	1.73403e-23	Lymphoid	TRIM22
LRP1	5.32847e-28	-2.46009	0.018	0.109	1.95027e-23	Lymphoid	LRP1
HLA-DPB1	5.5851e-28	1.83	0.057	0.018	2.0442e-23	Lymphoid	HLA-DPB1
MB	5.62535e-28	-0.9896	0.083	0.21	2.05894e-23	Lymphoid	MB
ITSN1	5.78829e-28	-2.4112	0.011	0.098	2.11857e-23	Lymphoid	ITSN1
CTC1	5.83892e-28	2.50539	0.043	0.012	2.1371e-23	Lymphoid	CTC1
AL355916.2	6.53871e-28	4.22832	0.011	0.001	2.39323e-23	Lymphoid	AL355916.2
EIF4E2	7.22753e-28	-1.31481	0.026	0.124	2.64535e-23	Lymphoid	EIF4E2
ETFDH	7.6077e-28	-1.17753	0.029	0.129	2.78449e-23	Lymphoid	ETFDH
KCNT2	7.69927e-28	-5.78154	0.001	0.08	2.81801e-23	Lymphoid	KCNT2
APP	8.0357e-28	-2.17424	0.017	0.108	2.94115e-23	Lymphoid	APP
ME3	8.31704e-28	-2.32649	0.01	0.096	3.04412e-23	Lymphoid	ME3
CACNG1	8.33295e-28	-2.53225	0.01	0.096	3.04994e-23	Lymphoid	CACNG1
SP140L	8.55919e-28	2.21311	0.071	0.026	3.13275e-23	Lymphoid	SP140L
LRMDA	8.71287e-28	-0.753536	0.085	0.209	3.189e-23	Lymphoid	LRMDA
CTDSPL	9.09798e-28	-3.60361	0.007	0.09	3.32995e-23	Lymphoid	CTDSPL
PPM1M	9.39248e-28	2.90295	0.03	0.006	3.43774e-23	Lymphoid	PPM1M
PPP3CB-AS1	9.56661e-28	-1.34259	0.025	0.123	3.50148e-23	Lymphoid	PPP3CB-AS1
SOS2	9.7569e-28	-0.571724	0.075	0.201	3.57112e-23	Lymphoid	SOS2
RTN2	1.01424e-27	-3.61109	0.005	0.086	3.71223e-23	Lymphoid	RTN2
AC024382.1	1.03478e-27	3.25149	0.02	0.003	3.78738e-23	Lymphoid	AC024382.1
IRAK4	1.04281e-27	2.30103	0.061	0.02	3.81679e-23	Lymphoid	IRAK4
GIMAP4	1.04618e-27	2.83365	0.024	0.004	3.82911e-23	Lymphoid	GIMAP4
SPAG9	1.05186e-27	-0.63006	0.078	0.206	3.8499e-23	Lymphoid	SPAG9
GPC6	1.05477e-27	-2.92419	0.015	0.104	3.86057e-23	Lymphoid	GPC6
EDARADD	1.09276e-27	2.8923	0.03	0.006	3.99961e-23	Lymphoid	EDARADD
SSBP4	1.22797e-27	2.14374	0.061	0.02	4.49448e-23	Lymphoid	SSBP4
CUTC	1.34717e-27	-1.18019	0.028	0.127	4.93078e-23	Lymphoid	CUTC
CASZ1	1.34952e-27	-2.53733	0.011	0.096	4.93938e-23	Lymphoid	CASZ1
CCDC80	1.49223e-27	-3.40383	0.01	0.094	5.46172e-23	Lymphoid	CCDC80
AKT3	1.55118e-27	1.10664	0.295	0.203	5.67746e-23	Lymphoid	AKT3
MAMDC2	1.63551e-27	-3.35345	0.01	0.094	5.98613e-23	Lymphoid	MAMDC2
VWA8	1.84218e-27	-0.383119	0.142	0.3	6.74256e-23	Lymphoid	VWA8
FNIP2	1.93801e-27	-1.49821	0.028	0.126	7.09332e-23	Lymphoid	FNIP2
TNRC6A	1.98785e-27	-0.39003	0.158	0.323	7.27572e-23	Lymphoid	TNRC6A
CAMSAP2	1.9976e-27	-2.40388	0.01	0.095	7.31142e-23	Lymphoid	CAMSAP2
TPST1	2.07094e-27	-2.77535	0.013	0.1	7.57984e-23	Lymphoid	TPST1
PPP1R27	2.17444e-27	-2.5576	0.008	0.092	7.95866e-23	Lymphoid	PPP1R27
DPYSL3	2.19746e-27	-3.97142	0.004	0.084	8.04292e-23	Lymphoid	DPYSL3
PDLIM2	2.24834e-27	3.29173	0.022	0.004	8.22914e-23	Lymphoid	PDLIM2
KANK1	2.31789e-27	-1.65391	0.021	0.114	8.4837e-23	Lymphoid	KANK1
C17orf97	2.36159e-27	3.48696	0.017	0.002	8.64367e-23	Lymphoid	C17orf97
ZNF608	2.44099e-27	-3.80702	0.004	0.083	8.93426e-23	Lymphoid	ZNF608
CUX1	2.59183e-27	-0.428432	0.108	0.248	9.48634e-23	Lymphoid	CUX1
SUGCT	2.68054e-27	-2.14329	0.013	0.099	9.81106e-23	Lymphoid	SUGCT
NIPSNAP2	2.8424e-27	-1.02216	0.05	0.16	1.04035e-22	Lymphoid	NIPSNAP2
IGF1R	2.87261e-27	-1.06674	0.039	0.143	1.05141e-22	Lymphoid	IGF1R
SMAP2	2.90108e-27	2.19988	0.055	0.017	1.06183e-22	Lymphoid	SMAP2
MCC	3.0028e-27	-1.71972	0.021	0.114	1.09905e-22	Lymphoid	MCC
AC023424.3	3.06256e-27	1.76685	0.16	0.087	1.12093e-22	Lymphoid	AC023424.3
OSTF1	3.15733e-27	2.19561	0.06	0.02	1.15562e-22	Lymphoid	OSTF1
TNFRSF1B	3.26747e-27	2.04542	0.064	0.022	1.19593e-22	Lymphoid	TNFRSF1B
AL360178.1	3.59192e-27	-2.69985	0.009	0.093	1.31468e-22	Lymphoid	AL360178.1
CYLD	3.69926e-27	2.04265	0.112	0.052	1.35397e-22	Lymphoid	CYLD
AL031595.2	3.70884e-27	3.45282	0.014	0.002	1.35747e-22	Lymphoid	AL031595.2
ENPEP	3.72802e-27	-2.83718	0.005	0.085	1.36449e-22	Lymphoid	ENPEP
CASC19	4.29939e-27	2.83043	0.03	0.007	1.57362e-22	Lymphoid	CASC19
AC022558.2	4.3645e-27	-2.0739	0.01	0.094	1.59745e-22	Lymphoid	AC022558.2
HDGFL3	4.37831e-27	-2.03285	0.015	0.103	1.6025e-22	Lymphoid	HDGFL3
ACOT11	4.46953e-27	-1.75794	0.018	0.109	1.63589e-22	Lymphoid	ACOT11
SACS	4.54707e-27	-1.28876	0.029	0.126	1.66427e-22	Lymphoid	SACS
CADM1	5.01598e-27	-2.04227	0.015	0.102	1.8359e-22	Lymphoid	CADM1
TECR	5.16124e-27	-1.10739	0.034	0.136	1.88907e-22	Lymphoid	TECR
UBE2B	6.26647e-27	-0.885287	0.062	0.179	2.29359e-22	Lymphoid	UBE2B
LPAR5	6.33929e-27	3.75293	0.011	0.001	2.32024e-22	Lymphoid	LPAR5
ADGRG1	6.48722e-27	2.94244	0.029	0.006	2.37439e-22	Lymphoid	ADGRG1
USP40	6.65219e-27	-1.55047	0.02	0.112	2.43477e-22	Lymphoid	USP40
TNS2	6.8663e-27	-3.53107	0.004	0.083	2.51313e-22	Lymphoid	TNS2
C15orf41	6.91223e-27	-1.30138	0.029	0.126	2.52994e-22	Lymphoid	C15orf41
KANSL1L	7.39006e-27	-0.760548	0.069	0.187	2.70484e-22	Lymphoid	KANSL1L
CAMK2B	7.69889e-27	-2.81717	0.009	0.092	2.81787e-22	Lymphoid	CAMK2B
STXBP5	7.90213e-27	1.81183	0.184	0.108	2.89226e-22	Lymphoid	STXBP5
LPAR2	8.09775e-27	3.79989	0.013	0.002	2.96386e-22	Lymphoid	LPAR2
TRAF3	8.49729e-27	2.02325	0.073	0.027	3.11009e-22	Lymphoid	TRAF3
SGCA	8.85306e-27	-1.96393	0.013	0.099	3.24031e-22	Lymphoid	SGCA
L3MBTL3	9.22837e-27	2.44685	0.044	0.012	3.37767e-22	Lymphoid	L3MBTL3
GMIP	9.28836e-27	3.34777	0.018	0.003	3.39963e-22	Lymphoid	GMIP
NNT	9.57346e-27	-0.658042	0.064	0.181	3.50398e-22	Lymphoid	NNT
VLDLR-AS1	9.71728e-27	-4.65225	0.002	0.079	3.55662e-22	Lymphoid	VLDLR-AS1
RPS6KA2	9.72315e-27	-1.05825	0.034	0.134	3.55877e-22	Lymphoid	RPS6KA2
MYCBP2	9.96321e-27	1.31793	0.305	0.226	3.64663e-22	Lymphoid	MYCBP2
HMGA1P4	1.23962e-26	2.77158	0.028	0.006	4.53713e-22	Lymphoid	HMGA1P4
CNR2	1.37536e-26	4.37539	0.011	0.001	5.03395e-22	Lymphoid	CNR2
DAAM1	1.43292e-26	-1.71033	0.027	0.121	5.24463e-22	Lymphoid	DAAM1
ARHGAP32	1.49313e-26	-2.0028	0.015	0.101	5.465e-22	Lymphoid	ARHGAP32
NRIP1	1.70587e-26	-1.40275	0.029	0.125	6.24364e-22	Lymphoid	NRIP1
LRP6	1.813e-26	-3.65232	0.006	0.084	6.63574e-22	Lymphoid	LRP6
HHATL	1.91116e-26	-3.1421	0.004	0.082	6.99503e-22	Lymphoid	HHATL
APMAP	2.08627e-26	2.59315	0.045	0.013	7.63595e-22	Lymphoid	APMAP
SPATS2	2.17789e-26	-1.08992	0.03	0.127	7.97128e-22	Lymphoid	SPATS2
COL21A1	2.58457e-26	-3.67194	0.004	0.081	9.45978e-22	Lymphoid	COL21A1
UBE2D1	2.58646e-26	-2.0406	0.015	0.1	9.46671e-22	Lymphoid	UBE2D1
AC002429.2	2.93821e-26	-2.66723	0.007	0.086	1.07542e-21	Lymphoid	AC002429.2
PDGFRA	2.94447e-26	-4.52008	0.004	0.08	1.0777e-21	Lymphoid	PDGFRA
CAMK2A	3.24252e-26	-3.57627	0.003	0.079	1.18679e-21	Lymphoid	CAMK2A
PBXIP1	3.69658e-26	2.38043	0.067	0.024	1.35298e-21	Lymphoid	PBXIP1
LRRC63	4.34103e-26	3.71729	0.013	0.001	1.58886e-21	Lymphoid	LRRC63
TCF7L1	4.40978e-26	-3.3826	0.007	0.086	1.61402e-21	Lymphoid	TCF7L1
NBEAL1	4.95737e-26	-0.937151	0.06	0.171	1.81445e-21	Lymphoid	NBEAL1
AL109930.1	5.59943e-26	-2.14192	0.016	0.101	2.04945e-21	Lymphoid	AL109930.1
RNF115	6.25241e-26	-0.686404	0.083	0.206	2.28845e-21	Lymphoid	RNF115
SCARB2	7.05897e-26	-1.34826	0.025	0.116	2.58365e-21	Lymphoid	SCARB2
JMJD1C	7.5871e-26	-0.30482	0.231	0.42	2.77695e-21	Lymphoid	JMJD1C
SPOCK1	8.59561e-26	-3.82558	0.005	0.081	3.14608e-21	Lymphoid	SPOCK1
AC024230.1	1.00171e-25	-6.59246	0.001	0.074	3.66637e-21	Lymphoid	AC024230.1
PAN3	1.00815e-25	1.19225	0.289	0.206	3.68995e-21	Lymphoid	PAN3
CDC42EP3	1.03289e-25	2.02522	0.085	0.035	3.78048e-21	Lymphoid	CDC42EP3
RASSF8	1.05884e-25	-3.26815	0.006	0.083	3.87545e-21	Lymphoid	RASSF8
PRICKLE2	1.08314e-25	-5.19493	0.001	0.074	3.9644e-21	Lymphoid	PRICKLE2
PADI2	1.11738e-25	-2.75549	0.006	0.084	4.08972e-21	Lymphoid	PADI2
TNNC1	1.37061e-25	-0.904214	0.094	0.219	5.01657e-21	Lymphoid	TNNC1
SIL1	1.38997e-25	-0.91867	0.044	0.146	5.08743e-21	Lymphoid	SIL1
AP001831.1	1.42644e-25	-2.56958	0.009	0.088	5.22091e-21	Lymphoid	AP001831.1
AL158068.2	1.61238e-25	3.7761	0.013	0.002	5.90146e-21	Lymphoid	AL158068.2
AHI1	1.63789e-25	-0.666613	0.093	0.217	5.99482e-21	Lymphoid	AHI1
GCH1	1.73934e-25	2.71758	0.029	0.006	6.36617e-21	Lymphoid	GCH1
RCOR3	1.7709e-25	-0.563517	0.083	0.208	6.48168e-21	Lymphoid	RCOR3
AC079142.1	1.87841e-25	-1.87914	0.013	0.095	6.87516e-21	Lymphoid	AC079142.1
KTN1	2.08072e-25	-0.350471	0.206	0.383	7.61566e-21	Lymphoid	KTN1
MED13L	2.41898e-25	-0.326914	0.23	0.415	8.85371e-21	Lymphoid	MED13L
SPEG	2.57992e-25	-2.20155	0.01	0.089	9.44276e-21	Lymphoid	SPEG
MAP4K3-DT	2.67649e-25	-1.35106	0.027	0.117	9.79621e-21	Lymphoid	MAP4K3-DT
RPS19	3.10939e-25	1.91192	0.081	0.033	1.13807e-20	Lymphoid	RPS19
AL021707.1	3.18033e-25	2.28956	0.064	0.023	1.16403e-20	Lymphoid	AL021707.1
ESRRB	3.21619e-25	-4.45648	0.002	0.074	1.17716e-20	Lymphoid	ESRRB
LMOD1	3.31722e-25	-3.99373	0.003	0.076	1.21414e-20	Lymphoid	LMOD1
SLC25A4	3.53359e-25	-1.3622	0.024	0.113	1.29333e-20	Lymphoid	SLC25A4
OSBPL3	3.61792e-25	1.81364	0.122	0.06	1.3242e-20	Lymphoid	OSBPL3
MEGF10	3.77932e-25	-3.6064	0.006	0.081	1.38327e-20	Lymphoid	MEGF10
LINC00623	3.88428e-25	2.72086	0.046	0.014	1.42169e-20	Lymphoid	LINC00623
MOB3A	3.8851e-25	2.14458	0.062	0.022	1.42198e-20	Lymphoid	MOB3A
TENM4	4.06042e-25	-3.89452	0.006	0.08	1.48616e-20	Lymphoid	TENM4
AC090772.1	4.11379e-25	3.76905	0.012	0.001	1.50569e-20	Lymphoid	AC090772.1
TGFBR1	4.22305e-25	1.88044	0.11	0.052	1.54568e-20	Lymphoid	TGFBR1
PTPRS	4.53587e-25	-2.49837	0.011	0.089	1.66017e-20	Lymphoid	PTPRS
C14orf39	4.8424e-25	-4.47772	0.001	0.073	1.77237e-20	Lymphoid	C14orf39
MYLK2	5.16768e-25	-2.78747	0.005	0.079	1.89142e-20	Lymphoid	MYLK2
RGMA	5.67465e-25	-4.70786	0.002	0.074	2.07698e-20	Lymphoid	RGMA
TTC9	5.69693e-25	3.18966	0.025	0.005	2.08513e-20	Lymphoid	TTC9
SLC12A2	5.73266e-25	-1.40854	0.026	0.115	2.09821e-20	Lymphoid	SLC12A2
CYP2J2	5.76185e-25	-2.89409	0.005	0.079	2.10889e-20	Lymphoid	CYP2J2
LPAR1	6.02597e-25	-5.01965	0.002	0.073	2.20556e-20	Lymphoid	LPAR1
SSPN	6.25197e-25	-4.20981	0.003	0.075	2.28828e-20	Lymphoid	SSPN
RNPC3	6.26178e-25	-0.485635	0.081	0.202	2.29187e-20	Lymphoid	RNPC3
SLMAP	6.89176e-25	-0.381707	0.108	0.243	2.52245e-20	Lymphoid	SLMAP
LRRTM4	7.06161e-25	-4.506	0.005	0.078	2.58462e-20	Lymphoid	LRRTM4
RAPH1	7.12022e-25	-1.41669	0.03	0.121	2.60607e-20	Lymphoid	RAPH1
AC012409.2	7.49987e-25	-4.17161	0.004	0.076	2.74503e-20	Lymphoid	AC012409.2
FERMT2	7.61978e-25	-2.09739	0.015	0.096	2.78892e-20	Lymphoid	FERMT2
SH3BGRL3	7.84202e-25	2.96176	0.031	0.007	2.87026e-20	Lymphoid	SH3BGRL3
SCN7A	8.08986e-25	-5.16375	0.002	0.073	2.96097e-20	Lymphoid	SCN7A
FHL3	8.7491e-25	-2.13161	0.013	0.094	3.20226e-20	Lymphoid	FHL3
DOK6	1.0482e-24	2.12944	0.074	0.029	3.83651e-20	Lymphoid	DOK6
NCAM1	1.09155e-24	-1.0499	0.039	0.135	3.99518e-20	Lymphoid	NCAM1
BMPER	1.09556e-24	-6.1485	0.001	0.07	4.00985e-20	Lymphoid	BMPER
AC100803.4	1.17524e-24	-3.23265	0.005	0.078	4.30151e-20	Lymphoid	AC100803.4
DDAH1	1.18119e-24	-3.32517	0.005	0.078	4.32326e-20	Lymphoid	DDAH1
RAB11A	1.30048e-24	1.38639	0.285	0.209	4.75989e-20	Lymphoid	RAB11A
HOOK2	1.31044e-24	-1.63446	0.018	0.102	4.79635e-20	Lymphoid	HOOK2
GLI3	1.3635e-24	-4.24547	0.004	0.076	4.99056e-20	Lymphoid	GLI3
MYF6	1.48856e-24	-2.18069	0.009	0.086	5.4483e-20	Lymphoid	MYF6
DDR2	1.53451e-24	-3.71933	0.006	0.079	5.61646e-20	Lymphoid	DDR2
STAMBPL1	1.56882e-24	1.82706	0.072	0.028	5.74205e-20	Lymphoid	STAMBPL1
AL096794.1	1.60017e-24	3.34261	0.018	0.003	5.85679e-20	Lymphoid	AL096794.1
AL590807.1	1.68973e-24	-2.53891	0.023	0.107	6.18457e-20	Lymphoid	AL590807.1
SLCO3A1	1.7555e-24	1.58384	0.141	0.074	6.4253e-20	Lymphoid	SLCO3A1
EEF1A1	1.75633e-24	1.47996	0.109	0.051	6.42833e-20	Lymphoid	EEF1A1
DANT2	1.77873e-24	-3.49241	0.006	0.08	6.51034e-20	Lymphoid	DANT2
LINC02511	1.84687e-24	-6.57176	0.001	0.071	6.75971e-20	Lymphoid	LINC02511
MGAT4A	1.8582e-24	2.05333	0.076	0.031	6.80122e-20	Lymphoid	MGAT4A
AL157786.1	1.93633e-24	2.59387	0.03	0.007	7.08715e-20	Lymphoid	AL157786.1
RAB11FIP4	2.08607e-24	3.13205	0.019	0.003	7.63522e-20	Lymphoid	RAB11FIP4
CEP170	2.10612e-24	-1.14512	0.035	0.128	7.7086e-20	Lymphoid	CEP170
CTNNA1	2.127e-24	-1.23577	0.038	0.132	7.78502e-20	Lymphoid	CTNNA1
MCUB	2.22031e-24	2.00478	0.08	0.033	8.12657e-20	Lymphoid	MCUB
MEIS2	2.22308e-24	2.66988	0.064	0.024	8.13671e-20	Lymphoid	MEIS2
GALNT18	2.3189e-24	-4.77	0.002	0.072	8.48742e-20	Lymphoid	GALNT18
RHOJ	2.40417e-24	-3.23984	0.008	0.082	8.79949e-20	Lymphoid	RHOJ
ZRANB3	2.61259e-24	-0.807224	0.044	0.143	9.56234e-20	Lymphoid	ZRANB3
ARHGAP42	3.00908e-24	-2.90828	0.008	0.083	1.10135e-19	Lymphoid	ARHGAP42
MLF1	3.20006e-24	-3.17593	0.006	0.079	1.17126e-19	Lymphoid	MLF1
MN1	3.2441e-24	-9.94225	0	0.068	1.18737e-19	Lymphoid	MN1
TRIM59	3.30617e-24	3.04431	0.023	0.005	1.21009e-19	Lymphoid	TRIM59
RERG	3.54742e-24	-4.41471	0.004	0.074	1.29839e-19	Lymphoid	RERG
AC020659.1	3.70153e-24	4.24816	0.011	0.001	1.3548e-19	Lymphoid	AC020659.1
SEPTIN9	4.10796e-24	1.73119	0.121	0.061	1.50356e-19	Lymphoid	SEPTIN9
TRIM13	4.21286e-24	-0.510024	0.099	0.225	1.54195e-19	Lymphoid	TRIM13
EML1	4.25937e-24	-3.63352	0.004	0.074	1.55897e-19	Lymphoid	EML1
NMRAL1	4.51443e-24	2.45856	0.039	0.011	1.65233e-19	Lymphoid	NMRAL1
PAM	4.67977e-24	-0.326435	0.227	0.405	1.71284e-19	Lymphoid	PAM
CPNE5	4.93465e-24	2.9919	0.018	0.003	1.80613e-19	Lymphoid	CPNE5
FYCO1	5.04306e-24	-0.723401	0.051	0.153	1.84581e-19	Lymphoid	FYCO1
BTG1	5.04373e-24	1.97912	0.074	0.03	1.84605e-19	Lymphoid	BTG1
ARMCX4	5.20195e-24	-1.55058	0.022	0.106	1.90397e-19	Lymphoid	ARMCX4
GYS1	5.35047e-24	-1.59791	0.022	0.106	1.95833e-19	Lymphoid	GYS1
IGFN1	5.45415e-24	-3.21064	0.006	0.079	1.99627e-19	Lymphoid	IGFN1
MEI1	6.23757e-24	3.41852	0.018	0.003	2.28301e-19	Lymphoid	MEI1
TTLL7	6.79677e-24	-2.05191	0.013	0.09	2.48769e-19	Lymphoid	TTLL7
SYNPO	6.90904e-24	-3.3344	0.004	0.075	2.52878e-19	Lymphoid	SYNPO
TMEM117	7.12624e-24	-0.618511	0.075	0.189	2.60827e-19	Lymphoid	TMEM117
CKMT2-AS1	8.07598e-24	-1.28642	0.027	0.113	2.95589e-19	Lymphoid	CKMT2-AS1
GOLIM4	8.43657e-24	-2.04074	0.015	0.094	3.08787e-19	Lymphoid	GOLIM4
OARD1	8.82991e-24	-1.0831	0.039	0.134	3.23184e-19	Lymphoid	OARD1
KCNN4	8.87089e-24	3.84736	0.01	0.001	3.24683e-19	Lymphoid	KCNN4
EMCN	9.35481e-24	-3.34676	0.013	0.088	3.42395e-19	Lymphoid	EMCN
IL1R1	9.77999e-24	-3.09331	0.006	0.077	3.57957e-19	Lymphoid	IL1R1
CORO2A	1.01045e-23	2.71154	0.022	0.004	3.69833e-19	Lymphoid	CORO2A
ADAMTSL3	1.01644e-23	-2.6476	0.013	0.09	3.72028e-19	Lymphoid	ADAMTSL3
RASSF7	1.02161e-23	3.37683	0.012	0.001	3.73919e-19	Lymphoid	RASSF7
FRMD4A	1.0738e-23	-1.57026	0.046	0.14	3.9302e-19	Lymphoid	FRMD4A
CLASP1	1.09594e-23	-0.307368	0.166	0.323	4.01124e-19	Lymphoid	CLASP1
SH3RF1	1.30111e-23	-2.88353	0.009	0.082	4.76218e-19	Lymphoid	SH3RF1
AC023421.2	1.30277e-23	3.50723	0.015	0.002	4.76828e-19	Lymphoid	AC023421.2
SAMD9L	1.44129e-23	1.94934	0.063	0.023	5.27526e-19	Lymphoid	SAMD9L
CACNB1	1.61841e-23	-1.69611	0.016	0.095	5.92354e-19	Lymphoid	CACNB1
NR6A1	1.79472e-23	-1.98048	0.013	0.089	6.56887e-19	Lymphoid	NR6A1
NTN4	1.82948e-23	-3.34327	0.006	0.077	6.69607e-19	Lymphoid	NTN4
ENOX1	1.86647e-23	-2.75158	0.01	0.083	6.83145e-19	Lymphoid	ENOX1
CPLANE1	1.88596e-23	-1.0058	0.045	0.141	6.9028e-19	Lymphoid	CPLANE1
FGFR1	1.96947e-23	-2.37482	0.012	0.087	7.20847e-19	Lymphoid	FGFR1
VCL	2.39084e-23	-0.813125	0.047	0.144	8.75073e-19	Lymphoid	VCL
RILPL1	2.39598e-23	-1.42597	0.022	0.104	8.76953e-19	Lymphoid	RILPL1
CLEC2B	2.528e-23	2.29152	0.053	0.018	9.25275e-19	Lymphoid	CLEC2B
NMRK2	2.56077e-23	-2.17924	0.008	0.081	9.37267e-19	Lymphoid	NMRK2
ZNF556	2.68573e-23	-4.26773	0.003	0.07	9.83004e-19	Lymphoid	ZNF556
YPEL2	3.21966e-23	-1.73503	0.018	0.096	1.17843e-18	Lymphoid	YPEL2
ASAP2	3.39123e-23	-4.32968	0.001	0.067	1.24123e-18	Lymphoid	ASAP2
TIMP3	3.47721e-23	-2.26192	0.023	0.104	1.27269e-18	Lymphoid	TIMP3
HSPB7	3.60884e-23	-3.02548	0.006	0.075	1.32087e-18	Lymphoid	HSPB7
KY	3.61259e-23	-3.19909	0.004	0.073	1.32224e-18	Lymphoid	KY
FAT4	3.68141e-23	-3.08817	0.006	0.076	1.34743e-18	Lymphoid	FAT4
IFRD1	3.88165e-23	-1.75336	0.015	0.093	1.42072e-18	Lymphoid	IFRD1
CHCHD3	4.02141e-23	-0.497781	0.086	0.203	1.47188e-18	Lymphoid	CHCHD3
CTTN	4.05027e-23	-3.42658	0.004	0.071	1.48244e-18	Lymphoid	CTTN
MRC2	4.1533e-23	-3.3971	0.008	0.079	1.52015e-18	Lymphoid	MRC2
NDST2	4.1778e-23	2.67787	0.04	0.012	1.52912e-18	Lymphoid	NDST2
SAP25	4.30159e-23	2.72158	0.034	0.009	1.57443e-18	Lymphoid	SAP25
SLCO4C1	4.35742e-23	4.28381	0.01	0.001	1.59486e-18	Lymphoid	SLCO4C1
RBPMS	4.36013e-23	-3.52345	0.006	0.076	1.59585e-18	Lymphoid	RBPMS
P4HA1	4.37777e-23	-0.890554	0.049	0.147	1.60231e-18	Lymphoid	P4HA1
CD74	4.44964e-23	0.94924	0.119	0.058	1.62861e-18	Lymphoid	CD74
SPATS2L	4.58989e-23	-1.28619	0.069	0.171	1.67994e-18	Lymphoid	SPATS2L
ANKRD1	4.62167e-23	-4.0095	0.008	0.078	1.69158e-18	Lymphoid	ANKRD1
BMPR2	4.98487e-23	-0.707336	0.085	0.199	1.82451e-18	Lymphoid	BMPR2
EPB41L5	5.0492e-23	-1.20873	0.022	0.103	1.84806e-18	Lymphoid	EPB41L5
CTBP2	5.19403e-23	-0.808203	0.047	0.143	1.90107e-18	Lymphoid	CTBP2
FAP	5.31654e-23	-4.22911	0.005	0.073	1.94591e-18	Lymphoid	FAP
NDRG2	5.70468e-23	-1.73146	0.014	0.09	2.08797e-18	Lymphoid	NDRG2
ITPR1	6.07161e-23	1.34625	0.133	0.07	2.22227e-18	Lymphoid	ITPR1
AC010186.3	6.11858e-23	3.48594	0.014	0.002	2.23946e-18	Lymphoid	AC010186.3
KCNS3	6.40722e-23	-4.09395	0.002	0.068	2.34511e-18	Lymphoid	KCNS3
PDE1A	6.54081e-23	-3.33922	0.009	0.08	2.394e-18	Lymphoid	PDE1A
SLC19A2	6.61589e-23	-2.16707	0.01	0.082	2.42148e-18	Lymphoid	SLC19A2
AC092436.3	6.65001e-23	3.20999	0.013	0.002	2.43397e-18	Lymphoid	AC092436.3
COQ10A	6.88371e-23	-2.55564	0.006	0.075	2.51951e-18	Lymphoid	COQ10A
STOX2	7.1614e-23	-5.07739	0.001	0.066	2.62114e-18	Lymphoid	STOX2
TAP2	7.29064e-23	2.35999	0.036	0.01	2.66845e-18	Lymphoid	TAP2
CRYAB	7.98536e-23	-1.18324	0.035	0.123	2.92272e-18	Lymphoid	CRYAB
FAM102B	8.57181e-23	1.87598	0.078	0.032	3.13737e-18	Lymphoid	FAM102B
SOAT1	8.6981e-23	2.01549	0.058	0.021	3.18359e-18	Lymphoid	SOAT1
ADHFE1	8.8716e-23	-1.5539	0.015	0.092	3.24709e-18	Lymphoid	ADHFE1
ERVMER61-1	9.3344e-23	3.0326	0.028	0.007	3.41648e-18	Lymphoid	ERVMER61-1
LAPTM4B	9.80168e-23	-1.99195	0.008	0.079	3.58751e-18	Lymphoid	LAPTM4B
RBMS3-AS3	1.00391e-22	-3.29755	0.004	0.071	3.67442e-18	Lymphoid	RBMS3-AS3
ADCY9	1.03864e-22	-0.806745	0.043	0.136	3.80153e-18	Lymphoid	ADCY9
ZC3H12C	1.04791e-22	-3.28553	0.004	0.071	3.83546e-18	Lymphoid	ZC3H12C
EXOC4	1.2185e-22	-0.36603	0.295	0.476	4.45985e-18	Lymphoid	EXOC4
LBH	1.28967e-22	2.31583	0.033	0.009	4.72034e-18	Lymphoid	LBH
MAT2A	1.33725e-22	-1.4658	0.019	0.097	4.89448e-18	Lymphoid	MAT2A
MYLPF	1.38197e-22	-1.17439	0.084	0.192	5.05815e-18	Lymphoid	MYLPF
GLS	1.3914e-22	1.36126	0.196	0.122	5.09267e-18	Lymphoid	GLS
MBNL3	1.40726e-22	2.16174	0.065	0.025	5.1507e-18	Lymphoid	MBNL3
SLC38A2	1.42445e-22	-0.673071	0.074	0.181	5.21362e-18	Lymphoid	SLC38A2
AC099066.2	1.46422e-22	-3.25959	0.004	0.071	5.35921e-18	Lymphoid	AC099066.2
SELENOP	1.47457e-22	-2.96338	0.011	0.083	5.39707e-18	Lymphoid	SELENOP
PHC2	1.55583e-22	-1.46446	0.021	0.1	5.69448e-18	Lymphoid	PHC2
SDCCAG8	1.61226e-22	-0.430904	0.082	0.194	5.90103e-18	Lymphoid	SDCCAG8
PA2G4	1.6991e-22	2.18266	0.065	0.025	6.21888e-18	Lymphoid	PA2G4
CEP250	1.84419e-22	2.37741	0.052	0.018	6.74994e-18	Lymphoid	CEP250
AP1G2	2.13103e-22	2.81474	0.025	0.006	7.79977e-18	Lymphoid	AP1G2
ULK4	2.23291e-22	1.70924	0.105	0.051	8.17266e-18	Lymphoid	ULK4
VWA5A	2.30059e-22	3.21292	0.036	0.01	8.42038e-18	Lymphoid	VWA5A
MFSD4B	2.3317e-22	-0.398565	0.096	0.215	8.53424e-18	Lymphoid	MFSD4B
EHBP1L1	2.40745e-22	-0.902912	0.043	0.136	8.81152e-18	Lymphoid	EHBP1L1
C12orf75	2.42706e-22	2.55458	0.055	0.019	8.88328e-18	Lymphoid	C12orf75
IKZF2	2.46981e-22	2.26969	0.126	0.067	9.03974e-18	Lymphoid	IKZF2
PKNOX2	2.5574e-22	-3.7369	0.003	0.068	9.36035e-18	Lymphoid	PKNOX2
DLEU2	2.78416e-22	-0.26636	0.265	0.45	1.01903e-17	Lymphoid	DLEU2
GP6	3.24578e-22	3.20653	0.02	0.004	1.18799e-17	Lymphoid	GP6
FRMD6	3.36158e-22	-3.72613	0.005	0.071	1.23037e-17	Lymphoid	FRMD6
PSMB8-AS1	3.3887e-22	3.64061	0.011	0.001	1.2403e-17	Lymphoid	PSMB8-AS1
AUH	3.43209e-22	-0.624621	0.06	0.162	1.25618e-17	Lymphoid	AUH
ZNF217	3.46255e-22	2.25658	0.048	0.016	1.26733e-17	Lymphoid	ZNF217
MYLK3	3.46707e-22	-3.68072	0.003	0.067	1.26898e-17	Lymphoid	MYLK3
BOC	3.55082e-22	-5.70069	0.001	0.063	1.29964e-17	Lymphoid	BOC
ATP8B4	3.83507e-22	1.72384	0.064	0.025	1.40367e-17	Lymphoid	ATP8B4
ASB2	4.04363e-22	-2.81003	0.005	0.071	1.48001e-17	Lymphoid	ASB2
HLA-F-AS1	4.06706e-22	2.47026	0.031	0.008	1.48858e-17	Lymphoid	HLA-F-AS1
RGS17	4.245e-22	2.44234	0.044	0.014	1.55371e-17	Lymphoid	RGS17
NCKAP5	4.59754e-22	-3.26192	0.008	0.077	1.68275e-17	Lymphoid	NCKAP5
PTPRB	4.61756e-22	-4.32892	0.007	0.074	1.69007e-17	Lymphoid	PTPRB
DHRS7B	5.3955e-22	-0.78791	0.038	0.126	1.97481e-17	Lymphoid	DHRS7B
VDAC3	5.99565e-22	-1.09998	0.031	0.115	2.19447e-17	Lymphoid	VDAC3
CUEDC1	6.61803e-22	-2.8883	0.006	0.073	2.42227e-17	Lymphoid	CUEDC1
C20orf194	6.80153e-22	-0.541695	0.095	0.208	2.48943e-17	Lymphoid	C20orf194
MAP3K5	6.90709e-22	1.34206	0.192	0.12	2.52806e-17	Lymphoid	MAP3K5
CDC42BPB	7.24512e-22	-3.22644	0.005	0.07	2.65179e-17	Lymphoid	CDC42BPB
AL592429.2	7.79285e-22	-1.53852	0.013	0.085	2.85226e-17	Lymphoid	AL592429.2
SMYD3	8.67525e-22	1.41417	0.36	0.306	3.17523e-17	Lymphoid	SMYD3
CDK8	9.54344e-22	-0.531609	0.075	0.182	3.49299e-17	Lymphoid	CDK8
ACAP2	9.66829e-22	1.37428	0.181	0.112	3.53869e-17	Lymphoid	ACAP2
IGFBP7	1.08122e-21	-1.99368	0.035	0.117	3.95736e-17	Lymphoid	IGFBP7
BCAS4	1.13849e-21	2.87484	0.022	0.005	4.16698e-17	Lymphoid	BCAS4
AP001528.1	1.13911e-21	-2.57655	0.008	0.075	4.16925e-17	Lymphoid	AP001528.1
SUCLG2-AS1	1.14678e-21	-2.1214	0.009	0.077	4.19734e-17	Lymphoid	SUCLG2-AS1
MEAK7	1.15591e-21	2.49371	0.038	0.011	4.23076e-17	Lymphoid	MEAK7
AC015914.1	1.23368e-21	-4.25494	0.002	0.064	4.51537e-17	Lymphoid	AC015914.1
LPIN2	1.26501e-21	2.1296	0.058	0.022	4.63006e-17	Lymphoid	LPIN2
DTNB	1.29729e-21	1.82796	0.09	0.042	4.74822e-17	Lymphoid	DTNB
PPFIBP2	1.52011e-21	-2.11471	0.007	0.073	5.56375e-17	Lymphoid	PPFIBP2
CCDC39	1.54868e-21	-2.09387	0.012	0.082	5.66833e-17	Lymphoid	CCDC39
FHL2	1.5541e-21	-3.1318	0.004	0.067	5.68815e-17	Lymphoid	FHL2
BVES-AS1	1.62441e-21	-3.65151	0.001	0.063	5.94551e-17	Lymphoid	BVES-AS1
AC006333.1	1.63905e-21	-4.29795	0.002	0.064	5.9991e-17	Lymphoid	AC006333.1
MECOM	1.73803e-21	-3.59837	0.011	0.079	6.36135e-17	Lymphoid	MECOM
PPP1R1C	1.77645e-21	-9.76808	0	0.06	6.50197e-17	Lymphoid	PPP1R1C
MKLN1	1.87053e-21	-0.250359	0.166	0.314	6.84631e-17	Lymphoid	MKLN1
LINC01584	1.92381e-21	-3.99282	0.002	0.064	7.04135e-17	Lymphoid	LINC01584
NFE2L1	1.94061e-21	-1.15158	0.024	0.102	7.10282e-17	Lymphoid	NFE2L1
SPARC	1.95164e-21	-2.00962	0.022	0.098	7.1432e-17	Lymphoid	SPARC
SFXN5	1.96382e-21	-3.16951	0.005	0.069	7.18776e-17	Lymphoid	SFXN5
PDZD2	1.98296e-21	-1.54448	0.033	0.115	7.25785e-17	Lymphoid	PDZD2
LUC7L3	1.98701e-21	-0.224608	0.177	0.33	7.27265e-17	Lymphoid	LUC7L3
AC046134.2	2.03642e-21	-1.47998	0.022	0.099	7.45349e-17	Lymphoid	AC046134.2
APOBEC3F	2.09438e-21	3.2824	0.016	0.003	7.66566e-17	Lymphoid	APOBEC3F
CRIM1	2.22585e-21	-0.725182	0.101	0.213	8.14682e-17	Lymphoid	CRIM1
AGFG2	2.5117e-21	3.11526	0.025	0.006	9.19306e-17	Lymphoid	AGFG2
SULT2B1	2.57054e-21	3.80875	0.01	0.001	9.40844e-17	Lymphoid	SULT2B1
USP3	2.65765e-21	1.57429	0.158	0.093	9.72728e-17	Lymphoid	USP3
LBR	2.84485e-21	2.2631	0.041	0.013	1.04124e-16	Lymphoid	LBR
CACHD1	2.87265e-21	-3.41379	0.004	0.067	1.05142e-16	Lymphoid	CACHD1
BMP5	2.95193e-21	-4.88448	0.003	0.064	1.08043e-16	Lymphoid	BMP5
ADAMTSL1	2.95442e-21	-4.63654	0.004	0.066	1.08135e-16	Lymphoid	ADAMTSL1
PRKCA	3.35335e-21	1.80348	0.159	0.095	1.22736e-16	Lymphoid	PRKCA
ADGRL4	3.56636e-21	-4.35514	0.005	0.068	1.30532e-16	Lymphoid	ADGRL4
UBE2H	3.62164e-21	-0.504379	0.096	0.211	1.32556e-16	Lymphoid	UBE2H
ACSL3	3.62977e-21	-1.1463	0.037	0.122	1.32853e-16	Lymphoid	ACSL3
HMOX2	3.66159e-21	2.44882	0.041	0.013	1.34018e-16	Lymphoid	HMOX2
KIF2A	3.707e-21	1.74039	0.122	0.065	1.3568e-16	Lymphoid	KIF2A
IGF1	4.04595e-21	-3.33728	0.006	0.07	1.48086e-16	Lymphoid	IGF1
SERPINF1	4.23571e-21	-2.03676	0.013	0.082	1.55031e-16	Lymphoid	SERPINF1
ANKRD26	4.83579e-21	-1.13819	0.027	0.106	1.76995e-16	Lymphoid	ANKRD26
ITPRID2	4.97398e-21	-1.42115	0.019	0.093	1.82053e-16	Lymphoid	ITPRID2
CDYL2	4.97899e-21	2.86465	0.027	0.006	1.82236e-16	Lymphoid	CDYL2
ARNTL	5.00202e-21	2.80878	0.043	0.014	1.83079e-16	Lymphoid	ARNTL
TLE4	5.01221e-21	-0.442985	0.123	0.246	1.83452e-16	Lymphoid	TLE4
AFAP1L1	5.06013e-21	-3.54826	0.004	0.065	1.85206e-16	Lymphoid	AFAP1L1
RIPK3	5.15505e-21	3.04772	0.014	0.002	1.8868e-16	Lymphoid	RIPK3
ASTN2	5.3457e-21	-1.14074	0.036	0.12	1.95658e-16	Lymphoid	ASTN2
GANC	5.5162e-21	-0.813589	0.043	0.132	2.01898e-16	Lymphoid	GANC
KLHL29	6.04171e-21	-2.85387	0.008	0.073	2.21132e-16	Lymphoid	KLHL29
SUN1	6.11641e-21	-0.798614	0.053	0.146	2.23867e-16	Lymphoid	SUN1
SLC8A1	6.32705e-21	-2.91117	0.011	0.078	2.31576e-16	Lymphoid	SLC8A1
AGAP2	6.3699e-21	2.26074	0.02	0.004	2.33145e-16	Lymphoid	AGAP2
SEMA6A	6.39905e-21	-1.89288	0.018	0.09	2.34212e-16	Lymphoid	SEMA6A
C1S	6.51639e-21	-1.43743	0.022	0.097	2.38507e-16	Lymphoid	C1S
MUSK	6.52549e-21	-3.19985	0.004	0.066	2.38839e-16	Lymphoid	MUSK
MMP25-AS1	6.68747e-21	2.3351	0.053	0.019	2.44768e-16	Lymphoid	MMP25-AS1
PABPC4	6.99945e-21	-1.18253	0.027	0.106	2.56187e-16	Lymphoid	PABPC4
ST3GAL3	7.17711e-21	-0.534613	0.077	0.182	2.62689e-16	Lymphoid	ST3GAL3
AC010149.1	7.21809e-21	2.40659	0.04	0.012	2.64189e-16	Lymphoid	AC010149.1
CADPS2	7.28713e-21	-3.67121	0.005	0.067	2.66716e-16	Lymphoid	CADPS2
TPCN1	7.32374e-21	-0.857527	0.038	0.123	2.68056e-16	Lymphoid	TPCN1
MYH6	7.99663e-21	-3.09184	0.006	0.068	2.92685e-16	Lymphoid	MYH6
PLCL1	8.42203e-21	-0.718572	0.081	0.183	3.08255e-16	Lymphoid	PLCL1
AL353135.2	8.497e-21	-1.60624	0.012	0.08	3.10999e-16	Lymphoid	AL353135.2
CHST12	8.52529e-21	2.25908	0.058	0.022	3.12034e-16	Lymphoid	CHST12
ARHGEF10L	8.5739e-21	-2.83945	0.006	0.07	3.13813e-16	Lymphoid	ARHGEF10L
ARHGEF11	9.1534e-21	-2.19336	0.009	0.075	3.35024e-16	Lymphoid	ARHGEF11
PARVA	9.58012e-21	-3.80743	0.003	0.063	3.50642e-16	Lymphoid	PARVA
ZNF439	9.59082e-21	2.54439	0.029	0.007	3.51034e-16	Lymphoid	ZNF439
STRIP2	9.9845e-21	-2.65737	0.004	0.066	3.65443e-16	Lymphoid	STRIP2
CSDE1	1.0314e-20	-0.569679	0.058	0.154	3.77501e-16	Lymphoid	CSDE1
ADAMTS12	1.07611e-20	-6.38897	0.001	0.06	3.93867e-16	Lymphoid	ADAMTS12
TMOD1	1.15151e-20	-1.6118	0.016	0.087	4.21464e-16	Lymphoid	TMOD1
LRRK2	1.16139e-20	-3.07867	0.006	0.068	4.25082e-16	Lymphoid	LRRK2
HSPB1	1.22471e-20	-1.86531	0.015	0.085	4.48257e-16	Lymphoid	HSPB1
AFDN	1.25757e-20	-2.35161	0.011	0.078	4.60283e-16	Lymphoid	AFDN
TTC7B	1.25768e-20	-0.902239	0.036	0.118	4.60324e-16	Lymphoid	TTC7B
IRF4	1.38065e-20	3.56983	0.01	0.001	5.0533e-16	Lymphoid	IRF4
LINC01515	1.39635e-20	-4.04126	0.005	0.066	5.11077e-16	Lymphoid	LINC01515
SH3RF3	1.40284e-20	-1.67385	0.012	0.079	5.13453e-16	Lymphoid	SH3RF3
IL4R	1.40342e-20	2.22543	0.053	0.019	5.13666e-16	Lymphoid	IL4R
AC021231.1	1.70668e-20	-3.01514	0.006	0.068	6.24661e-16	Lymphoid	AC021231.1
DAAM2	1.71018e-20	-3.78547	0.004	0.064	6.25944e-16	Lymphoid	DAAM2
SDK1	1.79044e-20	-2.35022	0.015	0.083	6.55319e-16	Lymphoid	SDK1
NCAM2	1.87065e-20	-3.32949	0.007	0.07	6.84676e-16	Lymphoid	NCAM2
JAK2	1.89602e-20	-0.648704	0.079	0.183	6.93964e-16	Lymphoid	JAK2
NPC1	1.93797e-20	1.74874	0.1	0.049	7.09318e-16	Lymphoid	NPC1
MFSD11	2.02704e-20	-1.12356	0.03	0.109	7.41918e-16	Lymphoid	MFSD11
OTOGL	2.2216e-20	-5.2579	0.001	0.058	8.13128e-16	Lymphoid	OTOGL
MAPK10	2.2528e-20	-5.73085	0.001	0.059	8.24549e-16	Lymphoid	MAPK10
CPVL	2.27607e-20	-3.45341	0.004	0.065	8.33066e-16	Lymphoid	CPVL
SPPL2A	2.36868e-20	-0.42198	0.079	0.184	8.66961e-16	Lymphoid	SPPL2A
RFFL	2.69223e-20	2.21368	0.078	0.035	9.85382e-16	Lymphoid	RFFL
AC099066.1	2.79065e-20	-3.68387	0.002	0.06	1.0214e-15	Lymphoid	AC099066.1
NTM	2.97962e-20	3.15597	0.088	0.042	1.09057e-15	Lymphoid	NTM
TMEM135	3.00736e-20	-0.631692	0.063	0.158	1.10072e-15	Lymphoid	TMEM135
RNASEH2B	3.16917e-20	1.69176	0.089	0.042	1.15995e-15	Lymphoid	RNASEH2B
ECM2	3.20389e-20	-2.02707	0.015	0.084	1.17266e-15	Lymphoid	ECM2
ATP6V0A2	3.29962e-20	2.29016	0.067	0.027	1.2077e-15	Lymphoid	ATP6V0A2
EDA	3.45412e-20	-1.95496	0.015	0.083	1.26424e-15	Lymphoid	EDA
CEP85	3.46308e-20	-1.59574	0.013	0.079	1.26752e-15	Lymphoid	CEP85
FO393401.1	3.52426e-20	2.33439	0.059	0.023	1.28991e-15	Lymphoid	FO393401.1
NAA50	3.61188e-20	-0.624398	0.048	0.136	1.32199e-15	Lymphoid	NAA50
PKIG	3.83028e-20	-1.38909	0.019	0.09	1.40192e-15	Lymphoid	PKIG
PLS3	3.8424e-20	-4.24534	0.004	0.063	1.40636e-15	Lymphoid	PLS3
MYH14	3.85201e-20	-2.86016	0.004	0.063	1.40987e-15	Lymphoid	MYH14
GLIPR2	4.14501e-20	1.986	0.049	0.017	1.51712e-15	Lymphoid	GLIPR2
RASA3	4.23737e-20	1.90336	0.095	0.047	1.55092e-15	Lymphoid	RASA3
TMEM131	4.61016e-20	-0.340254	0.109	0.227	1.68736e-15	Lymphoid	TMEM131
PIAS2	4.73819e-20	-0.792755	0.042	0.126	1.73422e-15	Lymphoid	PIAS2
TMSB10	4.75057e-20	1.56252	0.075	0.032	1.73875e-15	Lymphoid	TMSB10
MYO18A	4.75372e-20	-1.07961	0.029	0.106	1.73991e-15	Lymphoid	MYO18A
ELN	4.76401e-20	-3.49317	0.005	0.065	1.74368e-15	Lymphoid	ELN
PLCE1	4.93598e-20	-2.88054	0.008	0.071	1.80662e-15	Lymphoid	PLCE1
MROH7	4.98322e-20	-1.9914	0.011	0.075	1.82391e-15	Lymphoid	MROH7
DNAJB14	5.11959e-20	1.60986	0.127	0.07	1.87382e-15	Lymphoid	DNAJB14
STARD13-AS	5.1226e-20	-2.80192	0.006	0.066	1.87492e-15	Lymphoid	STARD13-AS
AC055854.1	5.136e-20	-4.54355	0.001	0.058	1.87983e-15	Lymphoid	AC055854.1
TRIM72	5.43711e-20	-2.57184	0.004	0.064	1.99004e-15	Lymphoid	TRIM72
PLEKHA2	5.50973e-20	1.75219	0.083	0.038	2.01662e-15	Lymphoid	PLEKHA2
PYGO1	5.88081e-20	-3.63733	0.002	0.06	2.15244e-15	Lymphoid	PYGO1
ZFYVE16	5.98393e-20	-0.795453	0.041	0.124	2.19018e-15	Lymphoid	ZFYVE16
ATCAY	6.00058e-20	-3.64643	0.003	0.061	2.19627e-15	Lymphoid	ATCAY
SUMF1	6.43442e-20	-0.302585	0.107	0.222	2.35506e-15	Lymphoid	SUMF1
ELOVL6	6.9294e-20	2.38488	0.046	0.016	2.53623e-15	Lymphoid	ELOVL6
EMP2	7.34216e-20	-5.37472	0.001	0.058	2.6873e-15	Lymphoid	EMP2
IL1RAPL1	7.40255e-20	-2.24559	0.008	0.069	2.70941e-15	Lymphoid	IL1RAPL1
TNPO1	7.73556e-20	-0.434644	0.076	0.177	2.83129e-15	Lymphoid	TNPO1
ANGPTL1	7.8708e-20	-1.70759	0.015	0.083	2.88079e-15	Lymphoid	ANGPTL1
WLS	8.15819e-20	-3.09799	0.005	0.064	2.98598e-15	Lymphoid	WLS
PDXDC1	8.43917e-20	-0.425066	0.09	0.196	3.08882e-15	Lymphoid	PDXDC1
VSIG10	8.83418e-20	-1.95479	0.008	0.071	3.2334e-15	Lymphoid	VSIG10
ACSS3	9.03027e-20	-3.26654	0.004	0.063	3.30517e-15	Lymphoid	ACSS3
LPL	9.08964e-20	-2.95067	0.006	0.067	3.3269e-15	Lymphoid	LPL
BCL2L13	9.29505e-20	-0.810543	0.03	0.107	3.40208e-15	Lymphoid	BCL2L13
BCL2L1	9.29535e-20	1.77059	0.077	0.034	3.40219e-15	Lymphoid	BCL2L1
AC097662.1	1.05902e-19	-4.13209	0.002	0.059	3.87611e-15	Lymphoid	AC097662.1
FN1	1.08046e-19	-2.3049	0.013	0.077	3.9546e-15	Lymphoid	FN1
ITPKB-AS1	1.10798e-19	2.70387	0.02	0.004	4.05532e-15	Lymphoid	ITPKB-AS1
NDUFS1	1.13387e-19	-0.869461	0.039	0.121	4.15008e-15	Lymphoid	NDUFS1
DCK	1.20991e-19	3.07527	0.018	0.003	4.42839e-15	Lymphoid	DCK
HES1	1.22275e-19	-2.86221	0.008	0.069	4.4754e-15	Lymphoid	HES1
PLSCR4	1.22535e-19	-2.72204	0.006	0.066	4.48492e-15	Lymphoid	PLSCR4
GTF2I	1.23589e-19	-0.389606	0.107	0.222	4.52348e-15	Lymphoid	GTF2I
AC008771.1	1.24383e-19	-0.640532	0.051	0.139	4.55254e-15	Lymphoid	AC008771.1
LARP1B	1.34765e-19	-1.1379	0.027	0.102	4.93254e-15	Lymphoid	LARP1B
PTP4A3	1.37308e-19	-1.93692	0.011	0.074	5.02562e-15	Lymphoid	PTP4A3
BMPR1B	1.40714e-19	-4.15724	0.002	0.058	5.15026e-15	Lymphoid	BMPR1B
YIPF7	1.49819e-19	-2.80527	0.004	0.061	5.48352e-15	Lymphoid	YIPF7
RASSF5	1.51479e-19	2.68719	0.032	0.009	5.54426e-15	Lymphoid	RASSF5
LYN	1.56362e-19	1.79036	0.059	0.023	5.72301e-15	Lymphoid	LYN
SH3PXD2B	1.59745e-19	-3.709	0.003	0.06	5.84684e-15	Lymphoid	SH3PXD2B
AC011346.1	1.61007e-19	-3.19305	0.005	0.063	5.89301e-15	Lymphoid	AC011346.1
PFDN1	1.6662e-19	-0.906167	0.043	0.127	6.09846e-15	Lymphoid	PFDN1
GBX1	1.69309e-19	-5.03964	0.001	0.057	6.19688e-15	Lymphoid	GBX1
CORO1C	1.73055e-19	-1.75199	0.013	0.078	6.33399e-15	Lymphoid	CORO1C
LILRB1	1.89302e-19	3.57477	0.011	0.001	6.92863e-15	Lymphoid	LILRB1
PIK3AP1	1.89317e-19	2.23708	0.032	0.009	6.9292e-15	Lymphoid	PIK3AP1
NCOA1	1.95841e-19	-0.259475	0.254	0.419	7.16799e-15	Lymphoid	NCOA1
MAP4K2	2.08298e-19	2.59329	0.027	0.007	7.62393e-15	Lymphoid	MAP4K2
COL5A1	2.11776e-19	-2.34977	0.013	0.076	7.75121e-15	Lymphoid	COL5A1
HACD1	2.1852e-19	-2.34417	0.008	0.068	7.99804e-15	Lymphoid	HACD1
RETREG1	2.31317e-19	-0.377523	0.07	0.167	8.46642e-15	Lymphoid	RETREG1
SPATA6	2.36051e-19	-1.92732	0.013	0.076	8.63969e-15	Lymphoid	SPATA6
SLC2A1	2.43468e-19	2.68353	0.014	0.002	8.91118e-15	Lymphoid	SLC2A1
CHSY3	2.43915e-19	-2.43914	0.01	0.071	8.92752e-15	Lymphoid	CHSY3
CENPP	2.57006e-19	-0.538934	0.06	0.15	9.40669e-15	Lymphoid	CENPP
MED13	2.67182e-19	-0.383396	0.102	0.213	9.77911e-15	Lymphoid	MED13
RHBDF2	2.71298e-19	2.35733	0.038	0.012	9.92976e-15	Lymphoid	RHBDF2
PIM1	2.78775e-19	2.96106	0.02	0.004	1.02034e-14	Lymphoid	PIM1
TRIM7	3.15997e-19	-3.10765	0.005	0.063	1.15658e-14	Lymphoid	TRIM7
SLIT2	3.19568e-19	-3.18943	0.006	0.064	1.16965e-14	Lymphoid	SLIT2
PREPL	3.19611e-19	-0.841707	0.033	0.11	1.16981e-14	Lymphoid	PREPL
UPF3A	3.2499e-19	-0.678366	0.05	0.136	1.1895e-14	Lymphoid	UPF3A
PRRG1	3.25376e-19	-4.24528	0.002	0.057	1.19091e-14	Lymphoid	PRRG1
ECHDC2	3.30955e-19	-0.46393	0.071	0.168	1.21133e-14	Lymphoid	ECHDC2
SBK1	3.38068e-19	-1.69949	0.013	0.076	1.23736e-14	Lymphoid	SBK1
PCYOX1	3.38892e-19	-2.19969	0.007	0.066	1.24038e-14	Lymphoid	PCYOX1
LRIG3	3.66729e-19	-5.9913	0.001	0.055	1.34226e-14	Lymphoid	LRIG3
PHKB	3.7434e-19	-0.317698	0.113	0.228	1.37012e-14	Lymphoid	PHKB
ADGRL2	3.87922e-19	-4.03271	0.004	0.06	1.41983e-14	Lymphoid	ADGRL2
MXRA8	3.92159e-19	-2.87505	0.006	0.065	1.43534e-14	Lymphoid	MXRA8
WWC2	4.0796e-19	-1.65296	0.014	0.078	1.49318e-14	Lymphoid	WWC2
TET1	4.08006e-19	-1.52749	0.018	0.084	1.49334e-14	Lymphoid	TET1
ELMO1-AS1	4.2022e-19	1.83184	0.053	0.02	1.53805e-14	Lymphoid	ELMO1-AS1
TXNL1	4.42677e-19	-1.05887	0.026	0.098	1.62024e-14	Lymphoid	TXNL1
UCKL1	4.46909e-19	-0.968898	0.031	0.106	1.63573e-14	Lymphoid	UCKL1
RIC1	4.46972e-19	-0.539365	0.069	0.164	1.63596e-14	Lymphoid	RIC1
SLC38A4	4.90606e-19	-2.77458	0.006	0.065	1.79567e-14	Lymphoid	SLC38A4
AL049828.1	5.05713e-19	-1.38775	0.018	0.084	1.85096e-14	Lymphoid	AL049828.1
AC117505.1	5.29744e-19	-3.72254	0.002	0.057	1.93892e-14	Lymphoid	AC117505.1
LNPK	5.40354e-19	-0.883011	0.034	0.11	1.97775e-14	Lymphoid	LNPK
ITIH5	5.61143e-19	-2.98433	0.008	0.068	2.05384e-14	Lymphoid	ITIH5
ARHGAP5	5.72961e-19	-1.09566	0.021	0.09	2.0971e-14	Lymphoid	ARHGAP5
LRRC3B	5.73858e-19	-2.61841	0.005	0.062	2.10038e-14	Lymphoid	LRRC3B
CEP128	5.94064e-19	-0.492032	0.079	0.177	2.17433e-14	Lymphoid	CEP128
CYBC1	6.3272e-19	2.39683	0.036	0.011	2.31582e-14	Lymphoid	CYBC1
AC092839.1	6.32823e-19	-3.89873	0.003	0.058	2.31619e-14	Lymphoid	AC092839.1
CCDC85A	6.96045e-19	-5.82406	0.001	0.055	2.5476e-14	Lymphoid	CCDC85A
AKAP9	7.38374e-19	-0.17078	0.246	0.416	2.70252e-14	Lymphoid	AKAP9
ACTR3C	7.3982e-19	3.38264	0.02	0.004	2.70781e-14	Lymphoid	ACTR3C
SLC24A1	7.45223e-19	2.34331	0.053	0.02	2.72759e-14	Lymphoid	SLC24A1
FAXDC2	7.71756e-19	-1.88658	0.013	0.076	2.8247e-14	Lymphoid	FAXDC2
MLXIPL	8.10766e-19	-3.20556	0.003	0.058	2.96748e-14	Lymphoid	MLXIPL
RAB29	8.16342e-19	3.07577	0.021	0.005	2.98789e-14	Lymphoid	RAB29
SLC25A27	8.85209e-19	-3.74698	0.002	0.056	3.23995e-14	Lymphoid	SLC25A27
ADAM23	8.96443e-19	-2.17043	0.007	0.065	3.28107e-14	Lymphoid	ADAM23
MMP25	9.07068e-19	3.57695	0.018	0.003	3.31996e-14	Lymphoid	MMP25
RCL1	9.36923e-19	-1.25267	0.022	0.09	3.42923e-14	Lymphoid	RCL1
CLIC4	9.37932e-19	-2.8076	0.008	0.067	3.43293e-14	Lymphoid	CLIC4
KLF6	9.86768e-19	1.61432	0.095	0.047	3.61167e-14	Lymphoid	KLF6
YWHAZ	1.00112e-18	1.6373	0.118	0.065	3.66422e-14	Lymphoid	YWHAZ
LIMS1	1.03625e-18	-0.510131	0.064	0.156	3.79279e-14	Lymphoid	LIMS1
SFMBT2	1.20538e-18	1.39814	0.189	0.126	4.41181e-14	Lymphoid	SFMBT2
ATG14	1.21091e-18	-0.795305	0.04	0.119	4.43206e-14	Lymphoid	ATG14
AL356124.1	1.31471e-18	-1.02748	0.029	0.102	4.81198e-14	Lymphoid	AL356124.1
CDKN2D	1.32144e-18	3.50106	0.011	0.002	4.83661e-14	Lymphoid	CDKN2D
MFHAS1	1.39796e-18	1.97668	0.062	0.025	5.11669e-14	Lymphoid	MFHAS1
RNF213-AS1	1.51689e-18	1.82478	0.078	0.036	5.55197e-14	Lymphoid	RNF213-AS1
KCNN3	1.59839e-18	-2.54799	0.008	0.066	5.85027e-14	Lymphoid	KCNN3
PDGFRB	1.63985e-18	-2.82184	0.012	0.072	6.00203e-14	Lymphoid	PDGFRB
ITGBL1	1.87921e-18	-3.42667	0.005	0.06	6.87809e-14	Lymphoid	ITGBL1
[truncated: 64,816 more rows]

## Sheet: c. Satellite cells
Seurat FindAllMarkers signficant marker genes distinguishing each satellite cell subpopulation relative to all other satellite cells.
p_val	avg_log2FC	% of Subpopulation	% of all other Satellite cells	p_val_adj	Subpopulation	gene
5.43134e-60	4.57347	0.521	0.004	1.98792e-55	SC_1	AC096577.1
3.15123e-35	2.98991	0.456	0.074	1.15338e-30	SC_1	TRDN
1.2473e-34	3.32954	0.309	0.001	4.56525e-30	SC_1	XIST
1.05133e-31	3.0862	0.301	0.014	3.84798e-27	SC_1	AC004053.1
2.0851e-27	3.00996	0.268	0.005	7.63167e-23	SC_1	TRHDE
5.64921e-21	0.467745	1	0.997	2.06767e-16	SC_1	MALAT1
2.7918e-19	1.99922	0.291	0.099	1.02183e-14	SC_1	FN1
2.29246e-18	1.21202	0.486	0.278	8.39065e-14	SC_1	APOE
5.49413e-18	1.68126	0.372	0.165	2.01091e-13	SC_1	MARCH1
1.661e-17	1.9114	0.272	0.066	6.07941e-13	SC_1	FKBP5
3.97422e-16	2.29201	0.148	0.002	1.45461e-11	SC_1	LINC01239
1.15683e-15	1.2245	0.493	0.296	4.23411e-11	SC_1	SPARCL1
8.08427e-14	2.14479	0.184	0.023	2.95892e-09	SC_1	CXXC4-AS1
1.39773e-13	1.25123	0.286	0.143	5.11583e-09	SC_1	FOXP2
2.84755e-13	1.96329	0.219	0.042	1.04223e-08	SC_1	TPD52L1
3.20785e-13	0.8186	0.691	0.556	1.1741e-08	SC_1	NFIA
8.10798e-13	1.90106	0.249	0.067	2.9676e-08	SC_1	TPRG1
7.28665e-12	1.85302	0.145	0.019	2.66699e-07	SC_1	LPL
1.26542e-11	0.878616	0.461	0.35	4.63156e-07	SC_1	IGFBP5
1.95242e-11	0.754115	0.669	0.567	7.14606e-07	SC_1	RBMS3
2.39527e-11	1.92826	0.116	0.003	8.76692e-07	SC_1	CXCL14
9.09021e-11	1.60049	0.153	0.042	3.32711e-06	SC_1	DYNC1I1
1.37779e-10	1.89131	0.127	0.003	5.04286e-06	SC_1	GREM1
3.54726e-10	1.52724	0.193	0.069	1.29833e-05	SC_1	ATP1A2
4.9907e-10	1.42439	0.259	0.139	1.82665e-05	SC_1	RNF150
1.25757e-09	1.59791	0.16	0.039	4.60283e-05	SC_1	LTBP1
2.01493e-09	1.2925	0.346	0.206	7.37483e-05	SC_1	FRMD4A
3.17623e-09	1.51309	0.177	0.068	0.000116253	SC_1	AGBL1
7.62435e-08	1.18663	0.078	0.011	0.00279059	SC_1	IL1RAP
8.63273e-08	1.30991	0.074	0.011	0.00315966	SC_1	AL133257.1
1.00954e-07	1.30256	0.074	0.018	0.00369503	SC_1	PLEKHH2
1.78145e-07	1.55608	0.201	0.063	0.00652027	SC_1	ZBTB16
2.2275e-07	1.31726	0.072	0.003	0.00815286	SC_1	AL391117.1
3.47608e-07	0.466281	0.652	0.625	0.0127228	SC_1	MT-CO3
4.97174e-07	1.20363	0.071	0.01	0.0181971	SC_1	GRIA4
5.50549e-07	1.3745	0.136	0.046	0.0201506	SC_1	NLGN4X
9.01942e-07	0.0529658	0.083	0.117	0.033012	SC_1	ATE1
1.19293e-06	0.920352	0.389	0.28	0.0436624	SC_1	RYR3
1.27979e-06	0.679911	0.728	0.62	0.0468416	SC_1	HMCN2
1.39594e-06	0.91786	0.197	0.126	0.0510927	SC_1	RBMS3-AS2
1.92169e-06	1.02345	0.339	0.23	0.0703356	SC_1	ABCA8
1.95664e-06	1.36965	0.116	0.028	0.0716149	SC_1	ELL2
4.11612e-06	1.07913	0.061	0.012	0.150654	SC_1	RXRG
4.61946e-06	1.1782	0.08	0.024	0.169077	SC_1	ERBB4
6.03302e-06	0.912773	0.048	0.003	0.220814	SC_1	OLFML3
7.65811e-06	1.57381	0.178	0.062	0.280294	SC_1	PTGDS
7.80443e-06	1.09509	0.079	0.019	0.28565	SC_1	SOX5
8.26511e-06	1.32376	0.216	0.104	0.302511	SC_1	ESRRG
9.48323e-06	1.08626	0.054	0.009	0.347096	SC_1	BMP6
9.68251e-06	0.387592	0.769	0.757	0.354389	SC_1	MEG3
1.24589e-05	1.0761	0.24	0.145	0.456009	SC_1	ESR1
1.30171e-05	0.901776	0.097	0.042	0.47644	SC_1	CLU
1.33719e-05	1.11366	0.144	0.059	0.489425	SC_1	CRISPLD2
1.42975e-05	1.035	0.064	0.012	0.523304	SC_1	TOGARAM2
1.67782e-05	1.40625	0.171	0.059	0.6141	SC_1	DLK1
1.98649e-05	1.46828	0.144	0.044	0.727075	SC_1	PPARGC1A
2.04182e-05	0.930233	0.074	0.026	0.747327	SC_1	STUM
3.126e-05	0.838838	0.04	0.001	1	SC_1	TRHDE-AS1
3.73044e-05	1.16906	0.18	0.085	1	SC_1	FHOD3
4.592e-05	0.900518	0.048	0.007	1	SC_1	SORL1
5.13626e-05	0.0628773	0.042	0.056	1	SC_1	AHCYL2
5.40977e-05	0.728785	0.037	0	1	SC_1	TSIX
5.88943e-05	1.20425	0.119	0.037	1	SC_1	ITIH5
6.48193e-05	1.0035	0.069	0.01	1	SC_1	ACKR3
9.20272e-05	0.0618324	0.103	0.145	1	SC_1	MED13
0.000102624	1.19566	0.071	0.005	1	SC_1	TRDN-AS1
0.000106847	0.988455	0.051	0.003	1	SC_1	AC099792.1
0.000108484	0.79026	0.045	0.004	1	SC_1	KEL
0.000111569	0.0185431	0.119	0.179	1	SC_1	DLG1
0.000130444	0.024703	0.028	0.039	1	SC_1	INPP5B
0.000142111	0.801425	0.496	0.405	1	SC_1	MIR99AHG
0.000143805	0.693319	0.432	0.386	1	SC_1	EGFR
0.000146227	0.795698	0.174	0.123	1	SC_1	ZHX3
0.000165169	1.27099	0.067	0.005	1	SC_1	GREB1
0.000179367	0.208876	0.073	0.084	1	SC_1	LMNA
0.000196578	1.09569	0.087	0.032	1	SC_1	SYTL4
0.000279955	1.03749	0.174	0.092	1	SC_1	PITPNC1
0.000310994	0.00145064	0.11	0.158	1	SC_1	PUM3
0.000334895	0.0791104	0.053	0.081	1	SC_1	ABI1
0.000392794	0.299711	0.933	0.908	1	SC_1	CADM2
0.000434408	0.619999	0.057	0.032	1	SC_1	MAL
0.000462335	1.34657	0.126	0.039	1	SC_1	PDP1
0.000470252	1.02656	0.044	0.006	1	SC_1	NFIA-AS2
0.000483097	0.872241	0.234	0.164	1	SC_1	PBX1
0.000484644	0.0879022	0.232	0.302	1	SC_1	CPQ
0.000487855	0.705668	0.029	0.002	1	SC_1	AC012636.1
0.000503016	0.711054	0.049	0.017	1	SC_1	SLC22A5
0.000597159	0.0361662	0.051	0.069	1	SC_1	TBL1X
0.000628366	0.81935	0.071	0.026	1	SC_1	AL392023.2
0.000654492	0.147466	0.065	0.093	1	SC_1	APPBP2
0.000687167	0.59033	0.026	0.002	1	SC_1	LINC01748
0.000710859	0.422051	0.092	0.071	1	SC_1	RPL10A
0.000735645	0.731094	0.044	0.015	1	SC_1	TP63
0.000743511	0.847735	0.134	0.084	1	SC_1	KIF16B
0.00082026	0.33789	0.46	0.45	1	SC_1	MT-CYB
0.000847757	0.615322	0.021	0.001	1	SC_1	ALX4
0.000847757	0.35822	0.021	0.01	1	SC_1	C1orf109
0.000871669	0.0162107	0.072	0.105	1	SC_1	ATP2A2
0.000914271	0.167165	0.046	0.06	1	SC_1	HLTF
0.000969345	0.0786694	0.071	0.1	1	SC_1	FBXL5
0.00101592	0.86786	0.108	0.054	1	SC_1	IGF1R
0.0010524	0.928262	0.278	0.216	1	SC_1	CDH4
0.001175	0.551869	0.074	0.053	1	SC_1	STAC3
0.00122334	0.83207	0.034	0.004	1	SC_1	CSRP2
0.00123085	0.0486922	0.062	0.088	1	SC_1	SLC25A12
0.00137974	0.676436	0.044	0.014	1	SC_1	SOX13
0.001388	0.700946	0.048	0.022	1	SC_1	TSC22D3
0.00141833	0.727768	0.042	0.01	1	SC_1	EGF
0.0014699	0.0316242	0.062	0.093	1	SC_1	MYO19
0.001476	0.453056	0.026	0.008	1	SC_1	CITED4
0.00150168	0.022846	0.013	0.02	1	SC_1	ARPC1B
0.00156121	0.0591075	0.099	0.126	1	SC_1	URI1
0.00159691	0.0644661	0.054	0.071	1	SC_1	ETFA
0.00170333	0.519089	0.552	0.523	1	SC_1	PTPRG
0.0017654	0.688588	0.242	0.18	1	SC_1	COL15A1
0.00183667	0.034751	0.028	0.044	1	SC_1	CDC25B
0.00187651	0.0287773	0.152	0.216	1	SC_1	TUT4
0.00193883	0.738469	0.144	0.103	1	SC_1	CEP85L
0.00201186	0.440985	0.073	0.064	1	SC_1	L3MBTL4
0.00202306	0.876458	0.337	0.251	1	SC_1	FOXO1
0.00205038	0.0449301	0.102	0.153	1	SC_1	PRRC2C
0.00217813	0.0501795	0.011	0.014	1	SC_1	SHF
0.00224863	0.0231246	0.038	0.062	1	SC_1	RUFY1
0.0022749	0.00431281	0.07	0.1	1	SC_1	NAP1L1
0.00228992	0.00105725	0.045	0.075	1	SC_1	AQR
0.00235505	0.0811523	0.024	0.036	1	SC_1	MPV17L
0.00237885	0.00240365	0.107	0.163	1	SC_1	CPLANE1
0.00238205	0.486851	0.04	0.015	1	SC_1	PNMT
0.00238527	0.593484	0.204	0.184	1	SC_1	RHOBTB3
0.00241803	0.0443679	0.092	0.133	1	SC_1	STX8
0.00245458	0.703846	0.049	0.016	1	SC_1	AC016745.1
0.0024738	0.111933	0.042	0.064	1	SC_1	MRPL19
0.00251594	0.00484139	0.01	0.017	1	SC_1	KLHDC3
0.00256887	0.0355831	0.017	0.026	1	SC_1	CEP135
0.00257631	0.524217	0.025	0.001	1	SC_1	TRPV5
0.00257631	0.46755	0.025	0.007	1	SC_1	CRLF1
0.00257631	0.318691	0.02	0.007	1	SC_1	CEBPB
0.00257631	0.0244205	0.007	0.015	1	SC_1	FAM189A1
0.00258768	0.00784516	0.093	0.133	1	SC_1	C11orf49
0.00260461	0.626884	0.474	0.436	1	SC_1	TLN2
0.00265019	0.74424	0.064	0.026	1	SC_1	NTRK3
0.00272749	0.0339572	0.017	0.025	1	SC_1	DSEL
0.00277696	0.119897	0.069	0.088	1	SC_1	GMDS
0.00285951	0.0695179	0.094	0.122	1	SC_1	POLK
0.00295276	0.0515132	0.036	0.049	1	SC_1	UBXN2B
0.00295873	0.0452059	0.09	0.129	1	SC_1	CNOT4
0.00304322	0.363074	0.042	0.024	1	SC_1	HDDC2
0.00304914	0.196814	0.348	0.405	1	SC_1	CHD9
0.00305844	0.0711546	0.027	0.039	1	SC_1	TMEM63A
0.00319682	0.0260058	0.047	0.08	1	SC_1	RAB28
0.00319781	0.671034	0.196	0.173	1	SC_1	PRKD1
0.00320796	0.0571516	0.029	0.041	1	SC_1	CPPED1
0.00320857	0.0251635	0.056	0.077	1	SC_1	SECISBP2L
0.00340418	0.055969	0.034	0.055	1	SC_1	HADHA
0.00356845	0.756375	0.031	0.014	1	SC_1	LINC01956
0.00358212	0.642115	0.044	0.012	1	SC_1	DAPK2
0.00365761	0.000712857	0.211	0.277	1	SC_1	FILIP1L
0.00370362	0.0614591	0.018	0.019	1	SC_1	ZFAND1
0.0037555	0.0539653	0.012	0.017	1	SC_1	MYNN
0.00377632	0.0272149	0.056	0.086	1	SC_1	PI4KA
0.00384673	0.0300555	0.096	0.131	1	SC_1	ARHGAP21
0.00389077	0.0261231	0.022	0.034	1	SC_1	RTCA
0.00389564	0.240247	0.033	0.021	1	SC_1	GFRA1
0.00392287	0.0548142	0.108	0.147	1	SC_1	POU2F1
0.00392701	0.0631556	0.076	0.108	1	SC_1	TSTD3
0.00394347	0.0440709	0.049	0.07	1	SC_1	ABCB7
0.00400386	0.0117825	0.025	0.034	1	SC_1	CARNMT1
0.00407718	0.0974213	0.028	0.039	1	SC_1	ATPAF1
0.00429316	0.849409	0.106	0.073	1	SC_1	SRPX2
0.00429617	0.137693	0.02	0.025	1	SC_1	CCP110
0.00435478	0.00892084	0.036	0.055	1	SC_1	EDRF1
0.00451185	0.284379	0.015	0.004	1	SC_1	AL445259.1
0.00451186	0.35849	0.012	0.002	1	SC_1	AC022034.1
0.00451186	0.341312	0.017	0.003	1	SC_1	AL359233.1
0.00451186	0.328262	0.017	0.004	1	SC_1	SLC16A9
0.00451186	0.272583	0.013	0.002	1	SC_1	AC004069.1
0.00451186	0.076059	0.016	0.018	1	SC_1	CLCC1
0.00456642	0.115671	0.019	0.02	1	SC_1	MTMR6
0.00462329	0.866904	0.103	0.063	1	SC_1	RNF217
0.00468349	0.16499	0.051	0.069	1	SC_1	FBXO34
0.00472157	0.0624031	0.052	0.07	1	SC_1	MED23
0.00484065	0.305845	0.546	0.56	1	SC_1	MT-CO1
0.00503671	0.0447975	0.117	0.139	1	SC_1	TNNT1
0.00519025	0.0274532	0.035	0.043	1	SC_1	WDR45B
0.00544019	0.0689037	0.039	0.059	1	SC_1	FBXL4
0.00545789	0.153868	0.028	0.045	1	SC_1	RHOQ
0.00553199	0.620634	0.036	0.008	1	SC_1	CXXC4
0.00553787	0.0796252	0.103	0.15	1	SC_1	SMC5
0.00568441	0.864278	0.103	0.057	1	SC_1	SLC47A1
0.00569465	0.909621	0.066	0.018	1	SC_1	NALCN
0.00571828	0.0285321	0.039	0.058	1	SC_1	FAM149B1
0.0061911	0.296415	0.017	0.01	1	SC_1	FBLN1
0.00621139	0.424693	0.027	0.014	1	SC_1	MROH7
0.00621972	0.288003	0.019	0.004	1	SC_1	CGNL1
0.00624892	0.0282329	0.12	0.156	1	SC_1	CWF19L2
0.00633082	0.0288015	0.219	0.297	1	SC_1	ARHGAP6
0.00651467	0.800855	0.056	0.024	1	SC_1	COL4A3
0.00653705	0.0875055	0.091	0.121	1	SC_1	PPP3CB
0.00658368	0.244255	0.055	0.063	1	SC_1	ZNF337-AS1
0.00661401	0.608486	0.251	0.203	1	SC_1	FOXO3
0.00662891	0.0186888	0.084	0.114	1	SC_1	ANAPC5
0.00692256	0.351583	0.017	0.005	1	SC_1	CERS3-AS1
0.00692974	0.0181646	0.015	0.029	1	SC_1	DDX19B
0.00709197	0.0143191	0.055	0.075	1	SC_1	CNN3
0.00709933	0.0553491	0.053	0.071	1	SC_1	UBR4
0.00712133	0.0159401	0.015	0.022	1	SC_1	C2orf42
0.00718507	1.10175	0.262	0.163	1	SC_1	MEF2A
0.00720478	0.0202278	0.216	0.288	1	SC_1	SETD5
0.0072178	0.0292664	0.017	0.024	1	SC_1	KRBA2
0.00722599	0.215814	0.034	0.033	1	SC_1	COMMD3
0.00723722	0.034197	0.009	0.015	1	SC_1	ECT2L
0.00730405	0.655765	0.04	0.013	1	SC_1	MLXIPL
0.00731586	0.0133567	0.044	0.07	1	SC_1	EMSY
0.00733059	0.0216011	0.018	0.026	1	SC_1	GXYLT1
0.00750173	0.00106693	0.031	0.045	1	SC_1	CHRNB1
0.00753317	1.02677	0.218	0.146	1	SC_1	ABLIM1
0.00772204	0.983568	0.069	0.017	1	SC_1	THBS4
0.00793649	0.252901	0.016	0.007	1	SC_1	GNG7
0.00793649	0.228148	0.016	0.01	1	SC_1	TMOD2
0.00793649	0.0298361	0.015	0.02	1	SC_1	TIMM17A
0.00797397	0.0712633	0.055	0.076	1	SC_1	TM9SF3
0.00800506	0.235072	0.057	0.073	1	SC_1	PPP2CB
0.00805302	0.048471	0.12	0.17	1	SC_1	SCFD1
0.00815748	0.0197032	0.043	0.062	1	SC_1	WDR75
0.00831963	0.774995	0.199	0.143	1	SC_1	KCNQ5
0.00854545	0.684942	0.08	0.047	1	SC_1	DIO3OS
0.00857882	0.0725704	0.04	0.064	1	SC_1	NUP88
0.00866409	0.0505193	0.088	0.118	1	SC_1	ROCK1
0.00867111	0.0163844	0.096	0.142	1	SC_1	ARID2
0.0088406	0.00298744	0.031	0.041	1	SC_1	DNAJC10
0.0089227	0.00667818	0.026	0.05	1	SC_1	AC073475.1
0.00904	0.177494	0.082	0.108	1	SC_1	SEC24B
0.00922232	0.786265	0.114	0.074	1	SC_1	GARNL3
0.00938187	0.0197098	0.038	0.063	1	SC_1	USP22
0.00941261	0.611979	0.036	0.009	1	SC_1	RHOU
0.00950551	0.0330639	0.022	0.034	1	SC_1	TMEM106B
0.00977852	0.599071	0.052	0.023	1	SC_1	IP6K3
0.00996085	0.316272	0.031	0.021	1	SC_1	AP000487.1
1.17943e-56	1.98718	0.857	0.395	4.31685e-52	SC_2A	MT-ND3
3.04233e-56	1.72266	0.938	0.515	1.11353e-51	SC_2A	MT-CO3
2.61876e-49	1.69676	0.875	0.445	9.58491e-45	SC_2A	MT-CO1
4.86467e-48	1.92416	0.794	0.327	1.78052e-43	SC_2A	MT-CYB
2.04711e-45	1.79487	0.838	0.366	7.49264e-41	SC_2A	MT-ATP6
4.13862e-44	1.84637	0.731	0.282	1.51478e-39	SC_2A	MT-ND1
1.42842e-43	1.65655	0.825	0.391	5.22815e-39	SC_2A	MT-CO2
4.13339e-43	1.77987	0.734	0.28	1.51286e-38	SC_2A	MT-ND4
7.06628e-41	2.06541	0.704	0.247	2.58633e-36	SC_2A	MT-ND2
1.5563e-29	1.87855	0.604	0.234	5.6962e-25	SC_2A	MTRNR2L12
2.90421e-21	1.73814	0.464	0.151	1.06297e-16	SC_2A	MT-ND5
8.64241e-16	1.69153	0.303	0.082	3.16321e-11	SC_2A	MT-ND4L
1.34443e-13	1.65193	0.221	0.055	4.92074e-09	SC_2A	MTRNR2L8
4.60529e-09	1.00164	0.427	0.249	0.000168558	SC_2A	APOE
1.01778e-08	1.50863	0.216	0.058	0.000372519	SC_2A	MT-ATP8
1.54893e-08	0.859267	0.521	0.377	0.000566922	SC_2A	COL3A1
2.42239e-08	0.714254	0.454	0.358	0.000886621	SC_2A	COL1A2
2.1489e-07	1.3207	0.083	0.023	0.0078652	SC_2A	AC105402.3
2.14589e-06	0.600773	0.086	0.05	0.0785416	SC_2A	C1R
3.11362e-06	0.8011	0.489	0.359	0.113962	SC_2A	DAG1
3.45328e-06	1.0869	0.208	0.102	0.126393	SC_2A	COL1A1
7.23836e-06	0.758562	0.396	0.286	0.264931	SC_2A	SPARC
3.46946e-05	0.431316	0.367	0.318	1	SC_2A	HSPG2
0.000143629	0.682456	0.123	0.074	1	SC_2A	FGL2
0.000144411	0.673734	0.305	0.218	1	SC_2A	NOTCH3
0.000144578	0.725378	0.281	0.203	1	SC_2A	COL6A2
0.000182175	0.52422	0.27	0.206	1	SC_2A	CD63
0.0001902	0.681047	0.315	0.239	1	SC_2A	COL6A1
0.000303665	0.369869	0.047	0.03	1	SC_2A	IFITM3
0.000352933	0.00696085	0.091	0.121	1	SC_2A	SMARCC1
0.000381287	0.00187294	0.061	0.074	1	SC_2A	SH3YL1
0.000847751	0.00713975	0.009	0.012	1	SC_2A	CENPQ
0.000906776	0.851645	0.134	0.063	1	SC_2A	MT-ND6
0.000967289	0.36915	0.077	0.057	1	SC_2A	LAMB2
0.00123061	0.757372	0.09	0.046	1	SC_2A	TIMP1
0.00123253	0.612407	0.205	0.15	1	SC_2A	GPC3
0.001476	0.0034992	0.007	0.01	1	SC_2A	GTF3C6
0.00165644	0.33672	0.082	0.062	1	SC_2A	RPL32
0.00206211	0.0615797	0.057	0.073	1	SC_2A	MIER1
0.0023326	0.124749	0.034	0.034	1	SC_2A	CEP44
0.0023878	0.361855	0.109	0.079	1	SC_2A	TPT1
0.00254758	0.0101492	0.016	0.017	1	SC_2A	KLHDC3
0.00257631	0.113883	0.012	0.006	1	SC_2A	RNF181
0.00257681	0.210505	0.028	0.02	1	SC_2A	UQCRQ
0.00331818	0.125259	0.054	0.057	1	SC_2A	CCDC102B
0.00359427	0.852352	0.167	0.095	1	SC_2A	S100A6
0.00370362	0.162409	0.023	0.02	1	SC_2A	GARS
0.00389055	0.120968	0.045	0.048	1	SC_2A	CDK5RAP3
0.00389417	0.104248	0.075	0.081	1	SC_2A	MAP3K20
0.00426515	0.608582	0.196	0.138	1	SC_2A	LTBP4
0.00440433	0.0267272	0.014	0.018	1	SC_2A	AC015813.1
0.00451186	0.0535238	0.011	0.011	1	SC_2A	CDC26
0.00451186	0.0506084	0.01	0.008	1	SC_2A	SLC27A4
0.00451186	0.00129931	0.007	0.008	1	SC_2A	AC104984.5
0.00472818	0.0156478	0.04	0.047	1	SC_2A	SCYL2
0.00522188	0.0596361	0.074	0.087	1	SC_2A	SPART
0.00600881	0.0027284	0.029	0.037	1	SC_2A	PDCD11
0.00604035	0.493131	0.07	0.042	1	SC_2A	MT2A
0.00607543	0.414947	0.085	0.06	1	SC_2A	HLA-C
0.00634061	0.437306	0.236	0.195	1	SC_2A	RPL41
0.00636458	0.0215132	0.018	0.021	1	SC_2A	ZNF384
0.00669705	0.0824235	0.045	0.052	1	SC_2A	ZNF718
0.00672051	0.00874506	0.023	0.027	1	SC_2A	ABHD16A
0.00678948	0.0473995	0.243	0.272	1	SC_2A	MUSK
0.0068389	0.0252034	0.015	0.018	1	SC_2A	CCT5
0.00688275	0.0637988	0.016	0.021	1	SC_2A	ZNF567
0.00703553	0.129539	0.03	0.027	1	SC_2A	CYB5R3
0.00716034	0.0247254	0.022	0.025	1	SC_2A	GTF2B
0.00735478	0.0159583	0.018	0.021	1	SC_2A	MYH3
0.00741642	0.0436676	0.039	0.048	1	SC_2A	ENOX2
0.00778415	0.0878329	0.077	0.095	1	SC_2A	LMO7
0.00782464	0.0039314	0.151	0.195	1	SC_2A	GMDS-DT
0.00793649	0.0283999	0.007	0.01	1	SC_2A	LSM14B
0.00793649	0.0143415	0.01	0.012	1	SC_2A	CHKB-DT
0.00793649	7.09546e-05	0.009	0.01	1	SC_2A	CYB5RL
0.00854156	0.627549	0.12	0.078	1	SC_2A	S100A4
0.0085488	0.00633994	0.039	0.047	1	SC_2A	EEF1AKMT2
0.00899234	0.067589	0.057	0.071	1	SC_2A	EVC
0.00904441	0.0935423	0.226	0.253	1	SC_2A	SASH1
0.00910179	0.00425332	0.034	0.042	1	SC_2A	UFSP2
0.00933132	0.132829	0.055	0.038	1	SC_2A	RPL39
0.00945136	0.186338	0.053	0.043	1	SC_2A	TMSB10
0.00973736	0.000407706	0.057	0.074	1	SC_2A	RUNX2
0.00978728	0.65062	0.105	0.07	1	SC_2A	MYH7
0.00996771	0.329298	0.101	0.087	1	SC_2A	HSP90B1
0.00997779	0.051183	0.03	0.032	1	SC_2A	TRPV1
2.41352e-09	0.948891	0.343	0.19	8.83374e-05	SC_2B	CREB5
9.09372e-09	1.65205	0.125	0.024	0.000332839	SC_2B	FOS
4.48716e-08	1.25996	0.087	0.018	0.00164235	SC_2B	JUNB
3.3188e-07	1.06279	0.209	0.091	0.0121472	SC_2B	NTM
3.46268e-07	1.2717	0.095	0.023	0.0126738	SC_2B	EGR1
5.68825e-07	1.36701	0.067	0.008	0.0208196	SC_2B	FOSB
1.16623e-06	0.764101	0.167	0.082	0.0426851	SC_2B	ABCA9
9.45289e-06	0.778398	0.095	0.03	0.345985	SC_2B	ERFE
1.29185e-05	0.953076	0.11	0.051	0.47283	SC_2B	KCND2
3.33711e-05	0.532372	0.725	0.649	1	SC_2B	MEG8
0.000104871	0.583024	0.201	0.133	1	SC_2B	BACH2
0.000202219	0.461836	0.189	0.143	1	SC_2B	AC124852.1
0.000310551	0.265585	0.13	0.117	1	SC_2B	TENT5A
0.00036365	0.66245	0.191	0.104	1	SC_2B	CHRDL2
0.000418918	0.0225777	0.281	0.31	1	SC_2B	TBC1D5
0.000547321	0.442629	0.079	0.044	1	SC_2B	IPCEF1
0.000609544	0.383337	0.802	0.742	1	SC_2B	MEG3
0.000629194	0.6038	0.376	0.29	1	SC_2B	PSD3
0.000734998	0.523062	0.236	0.174	1	SC_2B	AC079793.1
0.000753351	0.114237	0.185	0.206	1	SC_2B	SNRNP70
0.000855322	0.750042	0.076	0.034	1	SC_2B	DUSP1
0.00099886	0.472748	0.163	0.111	1	SC_2B	DENND2A
0.0010137	0.175438	0.051	0.049	1	SC_2B	GSG1L
0.00116628	0.71537	0.183	0.114	1	SC_2B	NCKAP5
0.00148568	0.331381	0.048	0.023	1	SC_2B	ADAMTS8
0.00152951	0.496052	0.111	0.06	1	SC_2B	ZNF536
0.00197617	0.745737	0.361	0.246	1	SC_2B	SYTL2
0.00213378	0.691307	0.075	0.03	1	SC_2B	CTNND2
0.00219177	0.22256	0.11	0.107	1	SC_2B	MARCH7
0.00227271	0.39687	0.346	0.313	1	SC_2B	GAREM1
0.00233406	0.131679	0.042	0.038	1	SC_2B	AC006460.2
0.0024218	0.0604214	0.072	0.077	1	SC_2B	MTMR1
0.00251348	0.0234659	0.032	0.043	1	SC_2B	GRB2
0.00251519	0.00231999	0.016	0.022	1	SC_2B	SPART-AS1
0.00257631	0.0669312	0.009	0.009	1	SC_2B	AC022816.1
0.00257631	0.0468712	0.005	0.004	1	SC_2B	LINC00339
0.00267142	0.202335	0.123	0.119	1	SC_2B	EEA1
0.00269425	0.0421934	0.027	0.031	1	SC_2B	MLH1
0.00270453	0.0579484	0.012	0.013	1	SC_2B	TAOK2
0.00272707	0.171699	0.32	0.329	1	SC_2B	REV3L
0.00278924	0.0999391	0.112	0.117	1	SC_2B	PITPNB
0.00285996	0.197259	0.04	0.033	1	SC_2B	HPCAL1
0.00340016	0.2816	0.061	0.049	1	SC_2B	ZNF44
0.00344473	0.205291	0.057	0.042	1	SC_2B	AC113346.2
0.0035789	0.110751	0.998	0.997	1	SC_2B	MALAT1
0.00397393	0.343938	0.14	0.11	1	SC_2B	TGFB2
0.00410744	0.0563942	0.018	0.018	1	SC_2B	CLPTM1L
0.00415481	0.371045	0.603	0.554	1	SC_2B	NFIA
0.00424482	0.155373	0.018	0.017	1	SC_2B	AC093865.1
0.00430618	0.177555	0.177	0.145	1	SC_2B	LTBP4
0.00440616	0.0450361	0.124	0.142	1	SC_2B	GHR
0.00451186	0.253481	0.019	0.007	1	SC_2B	ANKRD29
0.00451186	0.0159661	0.012	0.014	1	SC_2B	MPHOSPH6
0.00451558	0.0139403	0.017	0.021	1	SC_2B	SLC35G2
0.00489442	0.0351283	0.039	0.05	1	SC_2B	PDCD6
0.00504332	0.430693	0.625	0.533	1	SC_2B	HS3ST5
0.00524977	0.700553	0.227	0.153	1	SC_2B	ANK3
0.005488	0.388295	0.301	0.273	1	SC_2B	PRKN
0.00562719	0.181316	0.035	0.024	1	SC_2B	CXCL12
0.00569794	0.498085	0.108	0.065	1	SC_2B	PDE4B
0.00601824	0.00259916	0.037	0.046	1	SC_2B	CNBP
0.00607605	0.0603047	0.035	0.036	1	SC_2B	DELE1
0.00640632	0.0485718	0.021	0.023	1	SC_2B	TAFA2
0.00642337	0.00945966	0.008	0.011	1	SC_2B	C16orf87
0.00656737	0.0307435	0.053	0.054	1	SC_2B	AC034195.1
0.0065842	0.0190059	0.021	0.026	1	SC_2B	RBM10
0.00661298	0.108005	0.042	0.039	1	SC_2B	ING5
0.00664273	0.51766	0.097	0.05	1	SC_2B	TNXB
0.00688622	0.436399	0.456	0.38	1	SC_2B	CALCR
0.0069314	0.334677	0.276	0.235	1	SC_2B	SASH1
0.00703003	0.207909	0.022	0.01	1	SC_2B	C1orf87
0.0071481	0.503646	0.066	0.031	1	SC_2B	LINC02207
0.00723722	0.0756597	0.018	0.018	1	SC_2B	UFD1
0.00727376	0.0389412	0.087	0.1	1	SC_2B	USP3
0.00748834	0.161159	0.148	0.144	1	SC_2B	BBX
0.00762041	0.143025	0.042	0.039	1	SC_2B	SLC11A2
0.00767778	0.0175323	0.05	0.058	1	SC_2B	DNAJC2
0.00793649	0.408745	0.018	0.004	1	SC_2B	AL357507.1
0.00793649	0.0584595	0.009	0.008	1	SC_2B	PRR14
0.00796146	0.316753	0.175	0.141	1	SC_2B	DAAM1
0.00810027	0.0189323	0.033	0.038	1	SC_2B	PPP2R5A
0.00820126	0.319858	0.055	0.03	1	SC_2B	PTGIS
0.00840312	0.0668176	0.041	0.046	1	SC_2B	SEC23IP
0.00877424	0.0413425	0.024	0.024	1	SC_2B	C2orf68
0.00880814	0.2358	0.292	0.283	1	SC_2B	CHN1
0.00928531	0.152352	0.263	0.278	1	SC_2B	ASH1L
0.0093568	0.491626	0.078	0.048	1	SC_2B	STK32B
1.23383e-23	1.2429	0.56	0.206	4.51595e-19	SC_2C	AC012459.1
6.83054e-20	1.1427	0.748	0.396	2.50005e-15	SC_2C	HDAC2-AS2
6.90015e-18	1.00934	0.377	0.137	2.52552e-13	SC_2C	STARD4-AS1
7.95967e-16	0.863633	0.675	0.342	2.91332e-11	SC_2C	LINC00486
2.42602e-15	0.961985	0.367	0.121	8.87947e-11	SC_2C	AC012404.1
4.38872e-15	0.855668	0.478	0.217	1.60632e-10	SC_2C	IPO9-AS1
1.50012e-14	1.16169	0.311	0.094	5.4906e-10	SC_2C	AP002518.2
1.75497e-14	1.29367	0.257	0.056	6.42337e-10	SC_2C	AP000787.1
6.2326e-14	0.736349	0.177	0.056	2.2812e-09	SC_2C	FBXL13
1.60696e-13	0.945506	0.527	0.231	5.88164e-09	SC_2C	AL138828.1
1.04409e-12	1.60869	0.283	0.061	3.82148e-08	SC_2C	SPEF2
1.21169e-12	0.883409	0.477	0.225	4.43491e-08	SC_2C	ZFPM2-AS1
2.41964e-12	0.863356	0.472	0.2	8.85613e-08	SC_2C	AC015923.1
2.32915e-11	1.1177	0.289	0.083	8.52494e-07	SC_2C	PRSS23
9.83848e-11	0.966458	0.288	0.093	3.60098e-06	SC_2C	AL356124.1
1.28065e-10	0.641031	0.197	0.072	4.68732e-06	SC_2C	AP001011.1
1.55731e-10	0.912658	0.435	0.176	5.69992e-06	SC_2C	GNA14-AS1
2.63329e-10	0.686233	0.407	0.194	9.63809e-06	SC_2C	AC002429.2
6.51021e-10	0.786427	0.259	0.101	2.3828e-05	SC_2C	AL360178.1
7.24921e-10	0.593156	0.685	0.413	2.65329e-05	SC_2C	ARHGAP24
9.30399e-10	0.72454	0.462	0.216	3.40535e-05	SC_2C	ZBTB20-AS5
1.20077e-09	0.148292	0.277	0.176	4.39492e-05	SC_2C	SNRNP70
1.33536e-09	0.887164	0.341	0.163	4.88756e-05	SC_2C	ARHGAP15
1.40462e-09	0.415317	0.312	0.154	5.14104e-05	SC_2C	RUNX1T1
1.56596e-09	1.07641	0.215	0.056	5.73157e-05	SC_2C	AC137810.1
2.21909e-09	0.940631	0.244	0.071	8.12211e-05	SC_2C	AC068112.1
2.3484e-09	0.496268	0.447	0.253	8.59538e-05	SC_2C	TMEFF2
2.80431e-09	0.504095	0.247	0.118	0.000102641	SC_2C	SESN3
3.44367e-09	0.556619	0.276	0.131	0.000126042	SC_2C	KCNIP4
6.75461e-09	0.460814	0.328	0.162	0.000247226	SC_2C	CFH
7.13156e-09	0.819845	0.262	0.092	0.000261022	SC_2C	ADAM12
7.27525e-09	0.683655	0.232	0.089	0.000266281	SC_2C	ROR1
7.57202e-09	0.693082	0.093	0.018	0.000277143	SC_2C	FREM1
1.32221e-08	0.959086	0.225	0.066	0.000483943	SC_2C	TSHR
1.33764e-08	0.541007	0.186	0.07	0.000489591	SC_2C	ZBTB20-AS1
1.7316e-08	0.209714	0.288	0.169	0.000633782	SC_2C	CENPP
2.13509e-08	0.909574	0.162	0.052	0.000781463	SC_2C	DIRC3-AS1
2.7515e-08	0.797285	0.156	0.04	0.00100708	SC_2C	PARM1
3.36247e-08	0.218973	0.243	0.142	0.0012307	SC_2C	MBP
3.90004e-08	0.465974	0.326	0.186	0.00142745	SC_2C	PCDH7
4.42376e-08	0.84983	0.345	0.132	0.00161914	SC_2C	AC005237.1
4.79035e-08	0.386301	0.206	0.109	0.00175331	SC_2C	PPP2R3A
5.35466e-08	0.874967	0.132	0.033	0.00195986	SC_2C	AC007262.2
5.86681e-08	0.373476	0.061	0.015	0.00214731	SC_2C	LENG9
6.09714e-08	0.898	0.223	0.073	0.00223161	SC_2C	RYR2
6.43117e-08	0.258386	0.35	0.209	0.00235387	SC_2C	FOXP1
6.83394e-08	0.581077	0.17	0.058	0.00250129	SC_2C	PDE3A
8.00897e-08	0.514134	0.503	0.295	0.00293136	SC_2C	DIRC3
8.34796e-08	0.591147	0.11	0.03	0.00305544	SC_2C	CADM2-AS1
8.39036e-08	1.0444	0.287	0.099	0.00307095	SC_2C	AP003086.1
8.54476e-08	0.604993	0.119	0.044	0.00312747	SC_2C	DPYD-AS1
1.07364e-07	0.31677	0.33	0.203	0.00392964	SC_2C	KCNN3
1.20407e-07	0.354459	0.216	0.107	0.004407	SC_2C	TBC1D19
1.2763e-07	0.392639	0.542	0.321	0.00467139	SC_2C	PLAGL1
1.38415e-07	0.21286	0.084	0.04	0.00506614	SC_2C	SLC27A6
1.568e-07	0.636856	0.326	0.155	0.00573904	SC_2C	MFSD4B
1.60053e-07	0.352008	0.738	0.5	0.00585811	SC_2C	HS3ST5
1.80217e-07	0.304511	0.278	0.163	0.00659612	SC_2C	AC079793.1
1.92383e-07	0.561887	0.151	0.056	0.00704142	SC_2C	TRPA1
2.01186e-07	0.790521	0.215	0.071	0.00736362	SC_2C	RORA-AS1
2.05473e-07	0.36865	0.098	0.038	0.0075205	SC_2C	AC025171.1
2.07341e-07	0.191687	0.358	0.229	0.00758888	SC_2C	SGCE
2.10975e-07	0.545183	0.253	0.111	0.00772189	SC_2C	AC005909.2
2.93644e-07	0.401143	0.121	0.05	0.0107477	SC_2C	PRICKLE1
3.49936e-07	0.607367	0.183	0.064	0.012808	SC_2C	ARL17B
3.54591e-07	0.562012	0.072	0.02	0.0129784	SC_2C	AC110296.1
4.12775e-07	0.259556	0.423	0.275	0.015108	SC_2C	USP9Y
4.19438e-07	0.110873	0.264	0.17	0.0153518	SC_2C	TFDP2
4.87853e-07	0.449393	0.17	0.07	0.0178559	SC_2C	PRRX1
4.9269e-07	0.808094	0.246	0.093	0.0180329	SC_2C	SHOC1
6.0423e-07	0.214064	0.81	0.638	0.0221154	SC_2C	SPATS2L
6.73944e-07	0.199912	0.227	0.14	0.024667	SC_2C	SESN1
7.0313e-07	0.455848	0.153	0.069	0.0257353	SC_2C	CC2D2A
7.37495e-07	0.1217	0.203	0.126	0.026993	SC_2C	COA1
7.41004e-07	0.163185	0.051	0.022	0.0271215	SC_2C	SH3BP5
7.80236e-07	0.516724	0.132	0.053	0.0285574	SC_2C	COL6A6
7.93451e-07	0.813057	0.107	0.022	0.0290411	SC_2C	LNX1-AS1
8.36428e-07	0.298719	0.094	0.043	0.0306141	SC_2C	CD302
8.5546e-07	0.246619	0.261	0.149	0.0313107	SC_2C	RNF111
9.03911e-07	0.216205	0.699	0.506	0.0330841	SC_2C	DMD
9.26997e-07	0.328566	0.137	0.059	0.033929	SC_2C	ZBTB20-AS2
9.53318e-07	0.167914	0.136	0.075	0.0348924	SC_2C	LMO7
9.70072e-07	0.211008	0.114	0.057	0.0355056	SC_2C	ARHGEF6
9.81442e-07	0.613116	0.142	0.055	0.0359217	SC_2C	ANGPT2
1.09798e-06	0.800745	0.193	0.06	0.0401873	SC_2C	AC087286.2
1.10071e-06	0.613331	0.115	0.04	0.040287	SC_2C	AC114689.3
1.20779e-06	0.239032	0.304	0.173	0.0442063	SC_2C	RIN2
1.22593e-06	0.595347	0.242	0.104	0.0448702	SC_2C	TCHP
1.27761e-06	0.0604211	0.184	0.124	0.0467617	SC_2C	CUL3
1.33335e-06	0.292402	0.124	0.06	0.0488018	SC_2C	SMIM14
1.38729e-06	0.341556	0.142	0.067	0.0507761	SC_2C	CLMAT3
1.45678e-06	0.342365	0.263	0.138	0.0533195	SC_2C	TPCN1
1.46326e-06	0.60124	0.065	0.01	0.0535569	SC_2C	SCN1A-AS1
1.47741e-06	0.392923	0.541	0.315	0.0540746	SC_2C	MIR100HG
1.73815e-06	0.722593	0.141	0.052	0.063618	SC_2C	TMLHE-AS1
1.75333e-06	0.559004	0.316	0.17	0.0641737	SC_2C	ITGBL1
1.7724e-06	0.522248	0.178	0.073	0.0648715	SC_2C	ADAMTS6
1.90056e-06	0.528712	0.282	0.136	0.0695624	SC_2C	ARID5B
1.97268e-06	0.324513	0.385	0.236	0.0722019	SC_2C	FILIP1L
1.99442e-06	0.553759	0.379	0.187	0.0729978	SC_2C	FMN1
2.12233e-06	0.19748	0.305	0.191	0.0776793	SC_2C	AC025159.1
2.17289e-06	0.35551	0.141	0.072	0.0795298	SC_2C	SLC24A3
2.1772e-06	0.364123	0.3	0.169	0.0796877	SC_2C	KLHL13
2.1797e-06	0.16867	0.387	0.246	0.0797793	SC_2C	DPYD
2.17992e-06	0.27952	0.069	0.034	0.0797873	SC_2C	EFCAB5
2.32079e-06	0.216107	0.374	0.229	0.0849434	SC_2C	COL5A2
2.46442e-06	0.490374	0.079	0.026	0.0902003	SC_2C	C1QTNF7
2.55012e-06	0.191792	0.253	0.149	0.0933369	SC_2C	PCCA
2.57746e-06	0.266009	0.558	0.368	0.0943376	SC_2C	DDX5
2.61076e-06	0.345289	0.677	0.471	0.0955563	SC_2C	PLXDC2
2.73027e-06	0.216297	0.211	0.119	0.0999306	SC_2C	C1orf21
2.84981e-06	0.31694	0.093	0.038	0.104306	SC_2C	STK17A
2.90222e-06	0.393407	0.095	0.041	0.106224	SC_2C	P4HA2-AS1
3.10082e-06	0.704207	0.176	0.062	0.113493	SC_2C	ABHD15-AS1
3.15641e-06	0.0921167	0.25	0.156	0.115528	SC_2C	CHD6
3.46835e-06	0.158047	0.099	0.054	0.126945	SC_2C	CDK19
3.54886e-06	0.516209	0.083	0.027	0.129892	SC_2C	PTPRQ
3.57744e-06	0.373918	0.069	0.026	0.130938	SC_2C	COL10A1
3.6044e-06	0.489011	0.462	0.256	0.131925	SC_2C	SGCD
3.84838e-06	0.313786	0.089	0.033	0.140855	SC_2C	CDH11
3.96037e-06	0.298373	0.134	0.062	0.144954	SC_2C	AAMDC
4.35816e-06	0.44986	0.268	0.132	0.159513	SC_2C	GPC3
4.43358e-06	0.306142	0.113	0.049	0.162273	SC_2C	MACROD2
5.16198e-06	0.345326	0.138	0.064	0.188934	SC_2C	INSYN2A
5.24101e-06	0.373963	0.167	0.083	0.191826	SC_2C	MAX
5.31945e-06	0.637948	0.133	0.05	0.194697	SC_2C	AC131571.1
5.40683e-06	0.156916	0.368	0.232	0.197896	SC_2C	CDKAL1
5.73321e-06	0.649162	0.171	0.061	0.209841	SC_2C	AC053513.1
5.84563e-06	0.29539	0.505	0.319	0.213956	SC_2C	BNC2
5.97132e-06	0.365996	0.179	0.089	0.218556	SC_2C	STRADB
6.1293e-06	0.399328	0.221	0.099	0.224339	SC_2C	KCNT2
6.96409e-06	0.289532	0.33	0.187	0.254893	SC_2C	CDH4
7.79909e-06	0.223985	0.121	0.053	0.285455	SC_2C	CASC15
7.89743e-06	0.343976	0.108	0.044	0.289054	SC_2C	TTC33
8.16128e-06	0.469848	0.16	0.069	0.298711	SC_2C	AL356599.1
8.22113e-06	0.445295	0.274	0.148	0.300902	SC_2C	FHIT
8.60979e-06	0.386253	0.067	0.019	0.315127	SC_2C	FGF14
8.98775e-06	0.622686	0.175	0.066	0.328961	SC_2C	CELF2-AS2
9.14692e-06	0.378802	0.06	0.02	0.334786	SC_2C	PCDH19
9.50488e-06	0.389855	0.138	0.059	0.347888	SC_2C	CALN1
9.75028e-06	0.131912	0.603	0.429	0.35687	SC_2C	DOCK9
1.04407e-05	0.273954	0.039	0.012	0.382139	SC_2C	GDAP1L1
1.11298e-05	0.240179	0.832	0.652	0.407362	SC_2C	FTX
1.12795e-05	0.173185	0.126	0.068	0.41284	SC_2C	ZNF248
1.15704e-05	0.464015	0.177	0.088	0.42349	SC_2C	SEMA6A-AS1
1.17029e-05	0.406169	0.294	0.162	0.428339	SC_2C	LHFPL6
1.21061e-05	0.278954	0.108	0.052	0.443096	SC_2C	ARL17A
1.21958e-05	0.377254	0.201	0.1	0.446377	SC_2C	ZRANB3
1.22423e-05	0.519874	0.107	0.034	0.448079	SC_2C	AL078459.1
1.23782e-05	0.180533	0.07	0.036	0.453055	SC_2C	IFT81
1.2543e-05	0.114391	0.396	0.254	0.459088	SC_2C	TRPS1
1.25471e-05	0.189167	0.259	0.16	0.459235	SC_2C	RAPH1
1.25708e-05	0.623439	0.118	0.036	0.460104	SC_2C	AC009554.1
1.29602e-05	0.154174	0.08	0.044	0.474357	SC_2C	RPL7L1
1.36335e-05	0.391069	0.127	0.055	0.498998	SC_2C	BCL2L14
1.40607e-05	0.261177	0.155	0.083	0.514635	SC_2C	AC046134.2
1.4236e-05	0.0202536	0.173	0.117	0.521053	SC_2C	SPG11
1.52529e-05	0.383213	0.105	0.047	0.558273	SC_2C	FAM227B
1.56509e-05	0.650421	0.158	0.06	0.572838	SC_2C	PTPRD
1.57104e-05	0.0706807	0.059	0.032	0.575015	SC_2C	PARP11
1.57892e-05	0.390727	0.044	0.009	0.577902	SC_2C	AC100844.1
1.65449e-05	0.358096	0.204	0.104	0.605561	SC_2C	TMEM135
1.75442e-05	0.638859	0.151	0.055	0.642137	SC_2C	CRMP1
1.76316e-05	0.489091	0.117	0.045	0.645335	SC_2C	TRIM5
1.84379e-05	0.156934	0.083	0.041	0.674846	SC_2C	NAIP
1.9086e-05	0.263915	0.112	0.055	0.698565	SC_2C	LINC00174
1.94636e-05	0.462344	0.141	0.062	0.712387	SC_2C	PLCB4
2.04785e-05	0.788427	0.312	0.13	0.749534	SC_2C	CCDC146
2.1209e-05	0.493298	0.18	0.074	0.776272	SC_2C	MTERF4
2.14158e-05	0.41797	0.158	0.072	0.78384	SC_2C	AC211433.1
2.15605e-05	0.454986	0.062	0.017	0.789135	SC_2C	SRSF12
2.15816e-05	0.251361	0.226	0.123	0.789908	SC_2C	MPHOSPH8
2.19444e-05	0.0916236	0.194	0.122	0.803189	SC_2C	AR
2.21542e-05	0.547744	0.055	0.011	0.810866	SC_2C	AC113167.1
2.24504e-05	0.493704	0.312	0.149	0.821707	SC_2C	ECM2
2.27356e-05	0.31414	0.17	0.099	0.832146	SC_2C	MIR646HG
2.33041e-05	0.330402	0.11	0.047	0.852954	SC_2C	AL162253.2
2.50356e-05	0.230973	0.325	0.195	0.91633	SC_2C	MYO1E
2.63938e-05	0.359681	0.213	0.107	0.966039	SC_2C	RBMS3-AS2
2.67193e-05	0.252249	0.684	0.475	0.977952	SC_2C	PAX7
2.74008e-05	0.301101	0.125	0.06	1	SC_2C	IL7
2.7751e-05	0.516388	0.087	0.025	1	SC_2C	AL024474.2
2.80133e-05	0.247747	0.038	0.011	1	SC_2C	ZRANB2-AS1
2.83107e-05	0.595536	0.139	0.048	1	SC_2C	MAPK10
2.8659e-05	0.192406	0.229	0.131	1	SC_2C	DDR2
2.87153e-05	0.170243	0.285	0.173	1	SC_2C	STON2
2.89324e-05	0.657826	0.387	0.193	1	SC_2C	AC007319.1
2.93805e-05	0.232014	0.302	0.176	1	SC_2C	EPC1
2.95758e-05	0.436788	0.17	0.077	1	SC_2C	ZC3H8
2.96385e-05	0.544663	0.101	0.034	1	SC_2C	ADAMTS16
2.99012e-05	0.33309	0.098	0.046	1	SC_2C	AP002812.2
3.14381e-05	0.313468	0.209	0.112	1	SC_2C	VPS13A
3.14704e-05	0.109038	0.165	0.099	1	SC_2C	RNF213
3.2821e-05	0.270821	0.173	0.087	1	SC_2C	JAG1
3.43079e-05	0.480707	0.193	0.09	1	SC_2C	AC093879.1
3.45814e-05	0.418163	0.12	0.047	1	SC_2C	AC007384.1
3.67627e-05	0.493159	0.263	0.122	1	SC_2C	SLC9A9
3.72076e-05	0.221193	0.164	0.092	1	SC_2C	RAB1A
3.81114e-05	0.0792852	0.134	0.084	1	SC_2C	BCKDHB
4.05461e-05	0.0826221	0.247	0.156	1	SC_2C	ZMYM4
4.11875e-05	0.284763	0.056	0.019	1	SC_2C	BTBD8
4.13534e-05	0.32491	0.134	0.055	1	SC_2C	EDN3
4.28708e-05	0.322318	0.069	0.028	1	SC_2C	CPVL
4.29109e-05	0.475677	0.116	0.041	1	SC_2C	TRAF3IP2
4.33336e-05	0.428461	0.187	0.088	1	SC_2C	CRLF3
4.41351e-05	0.582316	0.255	0.122	1	SC_2C	THSD4
4.49664e-05	0.303647	0.174	0.086	1	SC_2C	ZNF608
4.54364e-05	0.760794	0.142	0.039	1	SC_2C	AC117834.1
4.58992e-05	0.214386	0.296	0.169	1	SC_2C	TET2
4.72475e-05	0.47564	0.185	0.082	1	SC_2C	AC002463.1
4.7275e-05	0.340219	0.169	0.079	1	SC_2C	CACHD1
4.73611e-05	0.152996	0.053	0.025	1	SC_2C	CARD8
5.18925e-05	0.244174	0.423	0.254	1	SC_2C	GNA14
5.40977e-05	0.335139	0.034	0.005	1	SC_2C	AC007099.1
5.43719e-05	0.426962	0.085	0.028	1	SC_2C	OMG
5.64901e-05	0.715896	0.202	0.073	1	SC_2C	AC008771.1
6.0023e-05	0.364691	0.077	0.027	1	SC_2C	LPAR6
6.05903e-05	0.0329212	0.221	0.145	1	SC_2C	SETD2
6.06945e-05	0.216355	0.092	0.05	1	SC_2C	AC087854.1
6.09378e-05	0.08466	0.288	0.19	1	SC_2C	LINC01473
6.1257e-05	0.178431	0.035	0.014	1	SC_2C	AL442003.1
6.14404e-05	0.581215	0.26	0.123	1	SC_2C	AC098617.1
6.16202e-05	0.426096	0.082	0.023	1	SC_2C	AL034417.2
6.35564e-05	0.506948	0.843	0.615	1	SC_2C	RORA
6.36178e-05	0.0735771	0.081	0.048	1	SC_2C	SKP1
6.49308e-05	0.368533	0.125	0.052	1	SC_2C	LRRC37A2
6.50221e-05	0.21965	0.195	0.106	1	SC_2C	AUXG01000058.1
6.52943e-05	0.36727	0.228	0.114	1	SC_2C	NREP
6.58073e-05	0.230473	0.078	0.039	1	SC_2C	SLX4IP
6.65378e-05	0.154089	0.13	0.074	1	SC_2C	NME7
6.78196e-05	0.269937	0.198	0.11	1	SC_2C	FBLN7
6.91089e-05	0.210026	0.072	0.033	1	SC_2C	KDM2B
7.04313e-05	0.158699	0.127	0.073	1	SC_2C	AIG1
7.06326e-05	0.310705	0.134	0.066	1	SC_2C	DNM3
7.13368e-05	0.568729	0.159	0.055	1	SC_2C	AC026894.1
7.23798e-05	0.230563	0.087	0.047	1	SC_2C	FAM149B1
7.25478e-05	0.076609	0.154	0.099	1	SC_2C	MIPOL1
7.31513e-05	0.292887	0.051	0.018	1	SC_2C	NEK5
7.37287e-05	0.222901	0.076	0.034	1	SC_2C	AL136366.1
7.54356e-05	0.131858	0.051	0.027	1	SC_2C	EFCAB7
7.6813e-05	0.0501507	0.095	0.058	1	SC_2C	HEATR5A
8.21272e-05	0.307327	0.097	0.044	1	SC_2C	CALCOCO1
8.2551e-05	0.0933714	0.053	0.025	1	SC_2C	MYH10
8.29632e-05	0.155258	0.028	0.011	1	SC_2C	LIPE
8.95837e-05	0.169054	0.47	0.325	1	SC_2C	ADAMTS9-AS2
9.31283e-05	0.160265	0.249	0.143	1	SC_2C	LONP2
9.36491e-05	0.293507	0.046	0.012	1	SC_2C	GPC6-AS1
9.41554e-05	0.47305	0.152	0.067	1	SC_2C	EFCAB13
0.000103595	0.220003	0.3	0.185	1	SC_2C	ZNF704
0.000104054	0.211703	0.072	0.038	1	SC_2C	AC104316.1
0.000106303	0.0942775	0.165	0.103	1	SC_2C	SECISBP2
0.000107074	0.330326	0.052	0.016	1	SC_2C	LINC02603
0.000107465	0.0617949	0.123	0.083	1	SC_2C	TET1
0.000113195	0.366522	0.385	0.218	1	SC_2C	MDFIC
0.000113624	0.27678	0.2	0.112	1	SC_2C	BTD
0.000114677	0.285004	0.039	0.008	1	SC_2C	C9orf170
0.000115709	0.275731	0.362	0.218	1	SC_2C	GXYLT2
0.000117136	0.376346	0.138	0.058	1	SC_2C	FRK
0.000118961	0.0228423	0.079	0.049	1	SC_2C	CYB5R4
0.000122464	0.302606	0.165	0.082	1	SC_2C	PSMA3
0.000122538	0.241376	0.047	0.016	1	SC_2C	ENO4
0.000128423	0.410165	0.044	0.012	1	SC_2C	AL583785.1
0.000128887	0.168117	0.211	0.125	1	SC_2C	ARL15
0.000129861	0.163791	0.101	0.052	1	SC_2C	MBD6
0.000130743	0.271165	0.2	0.112	1	SC_2C	AC002070.1
0.000131127	0.65314	0.154	0.052	1	SC_2C	ATF7IP2
0.000131471	0.0807295	0.093	0.055	1	SC_2C	EPS15L1
0.000131786	0.134768	0.089	0.051	1	SC_2C	PPP3CC
0.000133021	0.431873	0.085	0.03	1	SC_2C	LINC02664
0.000138177	0.178444	0.277	0.174	1	SC_2C	PIBF1
0.000138479	0.368884	0.312	0.173	1	SC_2C	PDXDC1
0.000141218	0.246581	0.081	0.039	1	SC_2C	TEX9
0.000143109	0.0336815	0.199	0.132	1	SC_2C	PRRC2C
0.000145766	0.180241	0.244	0.148	1	SC_2C	TNKS
0.000146075	0.0840038	0.087	0.051	1	SC_2C	DEK
0.000148867	0.278524	0.112	0.053	1	SC_2C	TVP23C
0.00015259	0.294859	0.068	0.031	1	SC_2C	AC127035.1
0.000161685	0.136484	0.237	0.142	1	SC_2C	CREBBP
0.000162316	0.217479	0.086	0.045	1	SC_2C	SPAG16
0.000166351	0.1976	0.109	0.055	1	SC_2C	CIR1
0.000168542	0.13548	0.564	0.391	1	SC_2C	TLE4
0.000170409	0.234375	0.229	0.135	1	SC_2C	MARCH3
0.000172164	0.263989	0.085	0.037	1	SC_2C	AC025171.2
0.000182098	0.261058	0.474	0.307	1	SC_2C	SSH2
0.000185995	0.340653	0.062	0.026	1	SC_2C	COL25A1
0.000188206	0.498042	0.096	0.041	1	SC_2C	AC092832.2
0.000192831	0.0331737	0.072	0.045	1	SC_2C	ANAPC4
0.000196893	0.158384	0.111	0.064	1	SC_2C	DUBR
0.000198117	0.322515	0.098	0.044	1	SC_2C	AL033504.1
0.000199571	0.111127	0.155	0.094	1	SC_2C	ATXN3
0.000200494	0.290568	0.039	0.011	1	SC_2C	AL356805.1
0.000203501	0.247871	0.174	0.092	1	SC_2C	COPG2
0.000204529	0.147928	0.244	0.151	1	SC_2C	TASP1
0.000204828	0.394041	0.27	0.137	1	SC_2C	CBR4
0.000208178	0.340959	0.099	0.041	1	SC_2C	SLC16A4
0.000209727	0.143554	0.034	0.015	1	SC_2C	AC004160.1
0.000210048	0.0984855	0.135	0.081	1	SC_2C	PCMTD1
0.000221752	0.27083	0.316	0.18	1	SC_2C	BBS9
0.000226827	0.736811	0.077	0.018	1	SC_2C	AL109930.1
0.000227363	0.0464765	0.201	0.129	1	SC_2C	HECTD1
0.000227657	0.19484	0.048	0.02	1	SC_2C	AC005162.3
0.000232283	0.0711824	0.242	0.155	1	SC_2C	CBLB
0.000233546	0.156705	0.046	0.02	1	SC_2C	PAXBP1-AS1
0.000238018	0.164636	0.102	0.057	1	SC_2C	FAM78B
0.000238668	0.221781	0.04	0.015	1	SC_2C	BTN3A1
0.000240549	0.0914639	0.474	0.343	1	SC_2C	MSC-AS1
0.000240928	0.468743	0.233	0.113	1	SC_2C	EDA
0.000242957	0.0768399	0.103	0.065	1	SC_2C	SMARCA5
0.000244848	0.596267	0.279	0.129	1	SC_2C	RAB11A
0.000244848	0.0481984	0.239	0.16	1	SC_2C	AP3B1
0.000245511	0.236879	0.068	0.03	1	SC_2C	RBM4B
0.000247993	0.23312	0.027	0.004	1	SC_2C	GPC6-AS2
0.0002502	0.42652	0.195	0.095	1	SC_2C	KLHL28
0.000251602	0.265372	0.097	0.045	1	SC_2C	SLC22A23
0.000257544	0.277238	0.209	0.111	1	SC_2C	TYW1
0.000258278	0.141336	0.235	0.148	1	SC_2C	GBF1
0.000259799	0.0539601	0.118	0.071	1	SC_2C	TBC1D2B
0.000259948	0.0348409	0.328	0.227	1	SC_2C	WSB1
0.000263093	0.0304663	0.065	0.04	1	SC_2C	LPXN
0.000269803	0.137231	0.081	0.048	1	SC_2C	GTF2IRD2B
0.000275982	0.187352	0.067	0.032	1	SC_2C	SDCBP2-AS1
0.000278148	0.426625	0.103	0.038	1	SC_2C	AL035427.1
0.000279745	0.293011	0.302	0.171	1	SC_2C	ZFHX3
0.000281151	0.0306251	0.016	0.009	1	SC_2C	AC073571.1
0.000281354	0.162678	0.347	0.211	1	SC_2C	SPRY1
0.000283573	0.207592	0.14	0.077	1	SC_2C	ZNF91
0.000284356	0.14673	0.131	0.075	1	SC_2C	VPS35L
0.000287771	0.907376	0.089	0.017	1	SC_2C	AC008696.2
0.000289507	0.025737	0.141	0.092	1	SC_2C	ATP2C1
0.000291966	0.162	0.223	0.139	1	SC_2C	METTL15
0.000293238	0.371578	0.039	0.005	1	SC_2C	AC110760.1
0.000294657	0.593496	0.134	0.05	1	SC_2C	AC027018.1
0.000297581	0.535503	0.064	0.02	1	SC_2C	SLC35F3
0.000298011	0.153859	0.242	0.144	1	SC_2C	CCDC18-AS1
0.000299718	0.473782	0.044	0.007	1	SC_2C	MCHR2-AS1
0.000299757	0.0272535	0.073	0.048	1	SC_2C	MARF1
0.000300696	0.0727822	0.353	0.244	1	SC_2C	PTK2
0.00030151	0.116802	0.085	0.048	1	SC_2C	PAK1
0.000306639	0.402251	0.071	0.02	1	SC_2C	AL391839.1
0.000307321	0.185394	0.127	0.073	1	SC_2C	TM2D1
0.000309771	0.0758698	0.1	0.065	1	SC_2C	ZC2HC1A
0.000309813	0.116586	0.118	0.07	1	SC_2C	MPP6
0.000309979	0.000375337	0.163	0.113	1	SC_2C	WWC2
0.000311364	0.627765	0.104	0.031	1	SC_2C	TENM3
0.000315819	0.18842	0.034	0.011	1	SC_2C	SLC24A1
0.000316054	0.697172	0.197	0.073	1	SC_2C	AC023509.6
0.000321225	0.19067	0.085	0.051	1	SC_2C	FSIP2-AS1
0.000325392	0.192829	0.057	0.022	1	SC_2C	AC009501.3
0.000339234	0.410928	0.408	0.238	1	SC_2C	RASA1
0.00033969	0.105559	0.094	0.056	1	SC_2C	MGMT
0.000339723	0.270549	0.228	0.128	1	SC_2C	GPSM2
0.00034234	0.0874569	0.08	0.047	1	SC_2C	GTF2H2
0.000346865	0.0378127	0.206	0.136	1	SC_2C	MAGI1
0.000350764	0.365179	0.116	0.051	1	SC_2C	ZKSCAN7-AS1
0.000354916	0.551552	0.062	0.012	1	SC_2C	PDE1C
0.000360624	0.429874	0.109	0.043	1	SC_2C	ADGRG2
0.000362817	0.245707	0.09	0.044	1	SC_2C	RAP1GAP2
0.000367134	0.3598	0.067	0.024	1	SC_2C	AC055733.2
0.000374248	0.285977	0.044	0.014	1	SC_2C	SCN9A
0.000375233	0.248342	0.27	0.152	1	SC_2C	KANSL1L
0.000383224	0.397599	0.173	0.085	1	SC_2C	GLRX
0.000384304	0.0128446	0.051	0.031	1	SC_2C	MTO1
0.000384874	0.125296	0.143	0.08	1	SC_2C	KIFAP3
0.000386556	0.0218165	0.054	0.033	1	SC_2C	KDSR
0.000390579	0.126669	0.125	0.071	1	SC_2C	MTA3
0.000396564	0.54178	0.136	0.048	1	SC_2C	AP001528.1
0.000403257	0.191515	0.091	0.049	1	SC_2C	TMEM65
0.000405001	0.128157	0.091	0.048	1	SC_2C	FASTKD1
0.000418584	0.0571678	0.346	0.237	1	SC_2C	FTO
0.000422645	0.111245	0.116	0.068	1	SC_2C	FGD4
0.000424681	0.178757	0.035	0.011	1	SC_2C	AC068491.2
0.00043132	0.293175	0.244	0.13	1	SC_2C	TBC1D8
0.000440472	0.570331	0.19	0.08	1	SC_2C	AC027698.1
0.000444793	0.186121	0.636	0.45	1	SC_2C	PDE7B
0.000445437	0.122016	0.083	0.049	1	SC_2C	TMEM220
0.000452929	0.0775365	0.072	0.04	1	SC_2C	ARL13B
0.000461017	0.578606	0.158	0.055	1	SC_2C	AP000331.1
0.00046195	0.515643	0.088	0.031	1	SC_2C	TMEM232
0.000462981	0.12679	0.321	0.205	1	SC_2C	ZRANB2
0.000463241	0.0995446	0.087	0.05	1	SC_2C	Z83843.1
0.000464955	0.155579	0.121	0.068	1	SC_2C	CCNC
0.00047271	0.0913547	0.092	0.057	1	SC_2C	NBN
0.000473114	0.146973	0.18	0.103	1	SC_2C	RAB3GAP1
0.000475576	0.225382	0.054	0.026	1	SC_2C	IQCH
0.000475576	0.0720298	0.06	0.036	1	SC_2C	DSTN
0.000477661	0.235697	0.088	0.043	1	SC_2C	AC015849.3
0.000480615	0.122631	0.427	0.292	1	SC_2C	EXOC4
0.00048242	0.05969	0.187	0.12	1	SC_2C	SOS2
0.000483876	0.355511	0.097	0.044	1	SC_2C	NME9
0.000486141	0.194691	0.15	0.08	1	SC_2C	ARMH4
0.000486865	0.0431132	0.182	0.111	1	SC_2C	EVI5
0.000487855	0.244901	0.027	0.007	1	SC_2C	AC007347.1
0.00049098	0.178176	0.253	0.15	1	SC_2C	TRA2A
0.000491615	0.0611221	0.163	0.098	1	SC_2C	SRGAP2
0.000504056	0.231487	0.043	0.017	1	SC_2C	PKD2L2
0.000508437	0.374234	0.037	0.008	1	SC_2C	AC092652.1
0.000508438	0.162006	0.034	0.013	1	SC_2C	ZNF350-AS1
0.000509501	0.0314692	0.058	0.036	1	SC_2C	EPRS
0.000510046	0.138533	0.281	0.178	1	SC_2C	UTY
0.000512837	0.438818	0.07	0.021	1	SC_2C	SLC13A4
0.000518414	0.342883	0.12	0.057	1	SC_2C	PLD1
0.000519774	0.426262	0.138	0.067	1	SC_2C	AC007098.1
0.000522381	0.127556	0.249	0.149	1	SC_2C	GRK3
0.000525624	0.109433	0.159	0.096	1	SC_2C	ANKAR
0.000527476	0.327889	0.07	0.025	1	SC_2C	DLGAP1
0.000528823	0.127835	0.9	0.731	1	SC_2C	LAMA2
0.000529738	0.248609	0.033	0.01	1	SC_2C	C21orf62
0.000529827	0.301902	0.079	0.033	1	SC_2C	POMZP3
0.00053216	0.124701	0.517	0.35	1	SC_2C	EGFR
0.000532209	0.138839	0.252	0.162	1	SC_2C	GMDS-DT
0.000542261	0.151176	0.05	0.025	1	SC_2C	AC010618.3
0.000551307	0.0515369	0.116	0.071	1	SC_2C	PDHX
0.000555436	0.390256	0.165	0.084	1	SC_2C	ATP8B1
0.000562802	0.227078	0.038	0.011	1	SC_2C	AC005856.1
0.000583406	0.314417	0.038	0.01	1	SC_2C	AC009560.4
0.000587504	0.186557	0.083	0.043	1	SC_2C	MANBA
0.000591648	0.224022	0.095	0.047	1	SC_2C	AC020611.2
0.000593852	0.0505579	0.052	0.029	1	SC_2C	C12orf4
0.000595104	0.183497	0.276	0.161	1	SC_2C	NTN4
0.000609544	0.0710522	0.036	0.02	1	SC_2C	DDX55
0.000616733	0.140209	0.532	0.355	1	SC_2C	SNED1
0.000618426	0.249456	0.04	0.013	1	SC_2C	ITGB5-AS1
0.000623668	0.0661436	0.17	0.105	1	SC_2C	WDR7
0.000631508	0.0459786	0.251	0.177	1	SC_2C	PICALM
0.000636829	0.203562	0.466	0.309	1	SC_2C	KANK1
0.000640368	0.518488	0.062	0.013	1	SC_2C	ROR1-AS1
0.000646601	0.342804	0.338	0.197	1	SC_2C	MLLT3
0.000647769	0.144123	0.161	0.092	1	SC_2C	LINC01138
0.000650223	0.0565281	0.052	0.032	1	SC_2C	IKBIP
0.000652919	0.506435	0.137	0.054	1	SC_2C	CCDC85A
0.000666355	0.221929	0.066	0.03	1	SC_2C	AC068533.3
0.000679185	0.0873874	0.188	0.123	1	SC_2C	SMARCA2
0.000685192	0.151759	0.305	0.193	1	SC_2C	DOCK1
0.0006852	0.195747	0.061	0.03	1	SC_2C	HDHD2
0.000688094	0.376602	0.144	0.059	1	SC_2C	MAST4
0.000688349	0.139307	0.091	0.051	1	SC_2C	ZNF680
0.000708214	0.0928804	0.056	0.031	1	SC_2C	AC104596.1
0.000708833	0.427569	0.089	0.032	1	SC_2C	AC092902.4
0.000719799	0.12277	0.428	0.289	1	SC_2C	CCNH
0.000720061	0.689616	0.233	0.093	1	SC_2C	MAK
0.000724787	0.121899	0.186	0.113	1	SC_2C	NSD3
0.000750232	0.052258	0.231	0.154	1	SC_2C	SPATA6
0.000757607	0.41095	0.182	0.092	1	SC_2C	RNF169
0.000764805	0.375446	0.085	0.034	1	SC_2C	LPAR4
0.00077561	0.193291	0.082	0.041	1	SC_2C	ERAP1
0.000781711	0.105884	0.215	0.136	1	SC_2C	ALDH1A1
0.000787926	0.134051	0.113	0.067	1	SC_2C	CD47
0.000788239	0.0465281	0.255	0.171	1	SC_2C	GOLGA8A
0.000791739	0.231966	0.05	0.021	1	SC_2C	C21orf62-AS1
0.000792975	0.119794	0.043	0.02	1	SC_2C	BCL9
0.000808631	0.206956	0.13	0.071	1	SC_2C	PRICKLE2
0.000815354	0.0828027	0.215	0.138	1	SC_2C	ABI2
0.00082559	0.240689	0.28	0.161	1	SC_2C	MAP4K4
0.000828892	0.0326431	0.023	0.015	1	SC_2C	FKBP1A
0.000847757	0.17489	0.028	0.009	1	SC_2C	AC026470.2
0.000847757	0.0619843	0.017	0.007	1	SC_2C	AC006460.1
0.000852338	0.00607057	0.047	0.033	1	SC_2C	PRRC2A
0.000856438	0.140068	0.049	0.023	1	SC_2C	ARMC9
0.000856785	0.365735	0.184	0.096	1	SC_2C	AC074032.1
0.000868252	0.0256585	0.089	0.058	1	SC_2C	SRSF1
0.000869159	0.157848	0.074	0.042	1	SC_2C	INKA2
0.000871169	0.322229	0.138	0.063	1	SC_2C	AC006059.1
0.00087146	0.146309	0.082	0.046	1	SC_2C	TMF1
0.000880116	0.230371	0.028	0.009	1	SC_2C	AC123768.3
0.000881983	0.125344	0.133	0.076	1	SC_2C	PJA2
0.000884864	0.441969	0.208	0.092	1	SC_2C	ABCA1
0.000885351	0.477386	0.205	0.092	1	SC_2C	GAB2
0.000892554	0.0898427	0.212	0.129	1	SC_2C	DYNC2H1
0.000898273	0.0957832	0.156	0.093	1	SC_2C	THUMPD3-AS1
0.000899776	0.0309279	0.05	0.032	1	SC_2C	RILPL1
0.00090399	0.061791	0.044	0.025	1	SC_2C	ZNF566
0.000908106	0.10422	0.056	0.03	1	SC_2C	SUGT1
0.000911451	0.0670932	0.069	0.039	1	SC_2C	GASK1B
0.000919457	0.0738679	0.035	0.017	1	SC_2C	SLC22A4
0.000921325	0.221397	0.104	0.055	1	SC_2C	LINC01605
0.00092675	0.0839806	0.04	0.019	1	SC_2C	AL450992.2
0.000932584	0.135054	0.057	0.029	1	SC_2C	RARRES1
0.000932584	0.0799921	0.047	0.029	1	SC_2C	LIX1-AS1
0.000937175	0.246314	0.56	0.369	1	SC_2C	TCF4
0.000942703	0.0596085	0.389	0.263	1	SC_2C	PTPN12
0.000948022	0.25476	0.045	0.016	1	SC_2C	AC244517.11
0.000948088	0.178787	0.115	0.065	1	SC_2C	PTRH2
0.000951521	0.576619	0.131	0.048	1	SC_2C	APTR
0.00096268	0.014389	0.286	0.193	1	SC_2C	MON2
0.000964424	0.364772	0.117	0.054	1	SC_2C	LRIG2-DT
0.000974601	0.117488	0.142	0.082	1	SC_2C	CFLAR
0.000981606	0.446533	0.113	0.042	1	SC_2C	AC023389.1
0.000995709	0.0281257	0.059	0.038	1	SC_2C	DERA
0.000996581	0.0863987	0.084	0.045	1	SC_2C	CRIM1
0.000999115	0.136778	0.171	0.108	1	SC_2C	UMAD1
0.000999236	0.171658	0.031	0.012	1	SC_2C	AC011405.1
0.00100269	0.125283	0.043	0.021	1	SC_2C	ANKRD27
0.0010064	0.208531	0.056	0.023	1	SC_2C	MCM3AP-AS1
0.00100733	0.0147551	0.213	0.141	1	SC_2C	ARID4B
0.00100847	0.0408777	0.048	0.027	1	SC_2C	CCS
0.0010246	0.306641	0.259	0.145	1	SC_2C	MET
0.00102718	0.220255	0.034	0.01	1	SC_2C	CSGALNACT1
0.0010336	0.394869	0.105	0.044	1	SC_2C	FSIP2
0.00104232	0.255271	0.258	0.143	1	SC_2C	FGGY
0.00105308	0.141604	0.09	0.048	1	SC_2C	TULP3
0.00106175	0.356495	0.089	0.037	1	SC_2C	AC018462.1
0.00106255	0.1121	0.086	0.048	1	SC_2C	VPS41
0.00107015	0.140392	0.126	0.072	1	SC_2C	MCM3AP
0.00107687	0.178116	0.237	0.143	1	SC_2C	AC068587.4
0.00108399	0.270481	0.086	0.039	1	SC_2C	UCKL1
0.00109851	0.302399	0.098	0.047	1	SC_2C	NHS
0.0011159	0.176158	0.15	0.081	1	SC_2C	SP100
0.00111699	0.098623	0.121	0.071	1	SC_2C	SPART
0.00111768	0.104555	0.097	0.056	1	SC_2C	PCGF3
0.00111807	0.144484	0.395	0.257	1	SC_2C	ARHGAP6
0.00112298	0.0543376	0.296	0.2	1	SC_2C	RBMS1
0.00113094	0.0685398	0.116	0.073	1	SC_2C	MFF
0.00113416	0.134804	0.129	0.073	1	SC_2C	KIAA0825
0.00113838	0.405194	0.072	0.025	1	SC_2C	PROCR
0.00114118	0.17007	0.1	0.057	1	SC_2C	METTL25
0.00115424	0.175358	0.136	0.075	1	SC_2C	ORC4
0.00117361	0.232599	0.158	0.087	1	SC_2C	GLI2
0.00117971	0.244351	0.072	0.032	1	SC_2C	MMP24
0.00118142	0.071417	0.235	0.154	1	SC_2C	THADA
0.00119072	0.0205236	0.126	0.08	1	SC_2C	AMBRA1
0.00119481	0.00539282	0.021	0.012	1	SC_2C	TMED2
0.00119782	0.0574672	0.453	0.338	1	SC_2C	IMMP2L
0.00121132	0.142965	0.339	0.215	1	SC_2C	CECR2
0.00121365	0.0512726	0.055	0.032	1	SC_2C	EIF4ENIF1
0.00121759	0.266136	0.03	0.009	1	SC_2C	HHIP
0.00122134	0.316172	0.061	0.02	1	SC_2C	SLC3A1
0.00123067	0.0735332	0.063	0.036	1	SC_2C	ZNF397
0.00123371	0.215491	0.207	0.118	1	SC_2C	GIT2
0.00123784	0.237347	0.027	0.007	1	SC_2C	ENKUR
0.00123916	0.179388	0.04	0.017	1	SC_2C	NUDT13
0.00124829	0.429754	0.073	0.025	1	SC_2C	CC2D2B
0.00124845	0.0417813	0.14	0.093	1	SC_2C	ATG10
0.00125207	0.222185	0.155	0.09	1	SC_2C	MCPH1
0.00126137	0.337711	0.07	0.029	1	SC_2C	AC079465.1
0.00126435	0.157547	0.021	0.005	1	SC_2C	SAMD3
0.00126435	0.051688	0.03	0.014	1	SC_2C	AKIRIN2
0.00126957	0.0558308	0.075	0.046	1	SC_2C	SLC25A46
0.00127395	0.0793892	0.272	0.184	1	SC_2C	CTNND1
0.0012771	0.0179863	0.065	0.041	1	SC_2C	ASCC1
0.00128002	0.202575	0.159	0.089	1	SC_2C	LMBRD1
0.00128277	0.423136	0.18	0.088	1	SC_2C	AL157938.2
0.00129377	0.0137443	0.125	0.081	1	SC_2C	KIAA0319L
0.00129831	0.38164	0.12	0.05	1	SC_2C	RPP38
0.0013069	0.178978	0.089	0.051	1	SC_2C	ATG5
0.00132051	0.277114	0.043	0.014	1	SC_2C	RAB15
0.0013246	0.44129	0.076	0.028	1	SC_2C	TACR1
0.00134489	0.0923563	0.51	0.365	1	SC_2C	CALCR
0.00135379	0.0253836	0.099	0.066	1	SC_2C	ERICH1
0.00136013	0.0899218	0.056	0.029	1	SC_2C	ZNF720
0.00136332	0.483933	0.139	0.074	1	SC_2C	DIAPH2-AS1
0.00136671	0.0869626	0.152	0.097	1	SC_2C	SP3
0.00136972	0.16254	0.61	0.423	1	SC_2C	PPP1R9A
0.00138669	0.239731	0.183	0.097	1	SC_2C	SPRED1
0.00139727	0.0258449	0.322	0.223	1	SC_2C	EHBP1
0.00141448	0.266483	0.433	0.282	1	SC_2C	DLG2
0.00142518	0.155746	0.19	0.11	1	SC_2C	ANKRD36B
0.00142534	0.192154	0.262	0.154	1	SC_2C	ABI3BP
0.00143889	0.0754873	0.275	0.188	1	SC_2C	ENOX1
0.00144972	0.167625	0.053	0.025	1	SC_2C	IQCG
0.00145262	0.0821407	0.143	0.084	1	SC_2C	GCC2
0.00145927	0.0976027	0.047	0.024	1	SC_2C	SCYL3
0.00147015	0.109262	0.056	0.029	1	SC_2C	SEC16B
0.00147285	0.16639	0.149	0.08	1	SC_2C	MBTD1
0.00147503	0.382625	0.245	0.123	1	SC_2C	MATN2
0.001476	0.257094	0.025	0.005	1	SC_2C	AC022424.2
0.001476	0.207008	0.021	0.005	1	SC_2C	AL161717.1
0.001476	0.185167	0.021	0.007	1	SC_2C	ARNT2
0.001476	0.176872	0.02	0.005	1	SC_2C	AC083805.2
0.001476	0.161111	0.022	0.005	1	SC_2C	AC008277.1
0.001476	0.126713	0.02	0.008	1	SC_2C	AC007193.1
0.001476	0.120635	0.016	0.004	1	SC_2C	DNMBP-AS1
0.001476	0.115046	0.018	0.006	1	SC_2C	WASF3-AS1
0.001476	0.0551053	0.016	0.007	1	SC_2C	GDPD1
0.001476	0.0501355	0.017	0.007	1	SC_2C	POLR3D
0.00147652	0.289431	0.033	0.011	1	SC_2C	AC013287.1
0.00147652	0.214204	0.032	0.009	1	SC_2C	SLC5A9
0.00147652	0.129182	0.04	0.018	1	SC_2C	ZNF713
0.00147871	0.379814	0.077	0.029	1	SC_2C	AC025164.1
0.0014903	0.0143833	0.062	0.038	1	SC_2C	GGA2
0.00149277	0.272077	0.132	0.067	1	SC_2C	ITGA9
0.00149535	0.0565932	0.024	0.013	1	SC_2C	BLVRB
0.00149667	0.424597	0.087	0.029	1	SC_2C	AC036214.1
0.00149996	0.192889	0.197	0.118	1	SC_2C	SEMA6A
0.00150516	0.283196	0.063	0.024	1	SC_2C	SIM1
0.0015109	0.407464	0.055	0.014	1	SC_2C	DOK6
0.00151499	0.0773615	0.039	0.019	1	SC_2C	AASDHPPT
0.00152081	0.0352781	0.03	0.016	1	SC_2C	ARPC1B
0.00153633	0.109695	0.083	0.047	1	SC_2C	SNAPC3
0.00153975	0.160174	0.125	0.071	1	SC_2C	AUH
0.00154435	0.135289	0.072	0.044	1	SC_2C	PPIL2
0.00154665	0.332542	0.036	0.007	1	SC_2C	AC097716.1
0.00156183	0.0241797	0.132	0.087	1	SC_2C	ERCC6L2
0.00156478	0.149896	0.071	0.037	1	SC_2C	XAF1
0.00156805	0.176208	0.078	0.041	1	SC_2C	GTF3C1
0.00157414	0.29855	0.049	0.014	1	SC_2C	AL359094.1
0.00157897	0.452193	0.113	0.043	1	SC_2C	LINC01482
0.00158145	0.124438	0.154	0.086	1	SC_2C	NPHP3
0.00158754	0.0610001	0.063	0.041	1	SC_2C	ELMOD3
0.00158764	0.122449	0.037	0.017	1	SC_2C	ZNF529-AS1
0.0016141	0.217236	0.039	0.016	1	SC_2C	GDF11
0.0016141	0.187771	0.039	0.013	1	SC_2C	HVCN1
0.00161478	0.0771543	0.163	0.099	1	SC_2C	TMEM131
0.00162922	0.18546	0.047	0.019	1	SC_2C	BMP4
0.00163026	0.131327	0.087	0.047	1	SC_2C	ASXL2
0.00163297	0.0951985	0.04	0.018	1	SC_2C	FZD4
0.00164127	0.0512387	0.206	0.139	1	SC_2C	PTPRA
0.00165845	0.21541	0.036	0.011	1	SC_2C	AC069272.1
0.00167412	0.21952	0.055	0.026	1	SC_2C	MORC4
0.00167894	0.141876	0.05	0.022	1	SC_2C	TTC8
0.00169299	0.0919579	0.522	0.362	1	SC_2C	CHD9
0.00171514	0.593606	0.096	0.026	1	SC_2C	RHD
0.0017177	0.188968	0.069	0.035	1	SC_2C	AL357873.1
0.00173816	0.120097	0.099	0.055	1	SC_2C	MTF2
0.00175132	0.136043	0.064	0.035	1	SC_2C	KAZN-AS1
0.00175496	0.0849068	0.228	0.13	1	SC_2C	WWTR1
0.00177759	0.0495258	0.057	0.035	1	SC_2C	UFSP2
0.0017828	0.0944553	0.13	0.079	1	SC_2C	CLIP4
0.00179013	0.0872931	0.077	0.05	1	SC_2C	NRXN2
0.00179545	0.328214	0.113	0.054	1	SC_2C	LAMB1
0.00181031	0.128513	0.13	0.077	1	SC_2C	TIAL1
0.00181602	0.201677	0.153	0.083	1	SC_2C	SNRK
0.00182447	0.0668721	0.162	0.108	1	SC_2C	MRTFB
0.00183418	0.0650926	0.091	0.053	1	SC_2C	YTHDF3
0.00184336	0.407355	0.099	0.038	1	SC_2C	AC009690.2
0.00185567	0.174747	0.156	0.092	1	SC_2C	ARHGEF3
0.00186812	0.216326	0.338	0.21	1	SC_2C	BCAS3
0.00187941	0.126192	0.166	0.101	1	SC_2C	TNS3
0.00190698	0.329989	0.079	0.031	1	SC_2C	LANCL1-AS1
0.00192432	0.299634	0.361	0.212	1	SC_2C	KIF13A
0.00193362	0.179505	0.374	0.23	1	SC_2C	MUSK
0.00193365	0.0228396	0.288	0.205	1	SC_2C	MAN2A1
0.00194094	0.089123	0.192	0.115	1	SC_2C	ARHGAP12
0.00194133	0.136807	0.087	0.048	1	SC_2C	LINC00278
0.00195847	0.290569	0.163	0.085	1	SC_2C	CENPC
0.00196874	0.082153	0.102	0.064	1	SC_2C	ITGB3BP
0.00200839	0.293856	0.148	0.082	1	SC_2C	AP002336.2
0.00202351	0.221391	0.055	0.023	1	SC_2C	MTCP1
0.0020311	0.0951068	0.194	0.119	1	SC_2C	NFE2L2
0.00207717	0.135201	0.117	0.068	1	SC_2C	MMS19
0.00207853	0.208878	0.024	0.005	1	SC_2C	AL592430.1
0.00209731	0.0909084	0.358	0.256	1	SC_2C	SMYD3
0.00209811	0.20101	0.02	0.006	1	SC_2C	AC009137.1
0.00209811	0.148572	0.022	0.01	1	SC_2C	AC006355.2
0.00211004	0.518567	0.101	0.038	1	SC_2C	CCDC18
0.00211786	0.0915135	0.023	0.011	1	SC_2C	PML
0.00212779	0.183665	0.026	0.009	1	SC_2C	AC080162.1
0.00213607	0.00429521	0.134	0.097	1	SC_2C	SEC63
0.00213777	0.108108	0.024	0.007	1	SC_2C	LINC01607
0.0021478	0.0880462	0.018	0.007	1	SC_2C	TBC1D9
0.00215787	0.220242	0.033	0.011	1	SC_2C	LINC01089
0.00216798	0.0496215	0.015	0.007	1	SC_2C	VAV3-AS1
0.00217382	0.410918	0.056	0.018	1	SC_2C	RHBDL2
0.00217813	0.0404968	0.017	0.008	1	SC_2C	AC011815.2
0.00222546	0.132527	0.11	0.064	1	SC_2C	SECISBP2L
0.0022354	0.492977	0.169	0.078	1	SC_2C	AC023424.3
0.00224307	0.0534692	0.271	0.18	1	SC_2C	NSMCE2
0.00225148	0.0451567	0.368	0.259	1	SC_2C	CHN1
0.00225528	0.309924	0.103	0.042	1	SC_2C	WDR19
0.00226189	0.0694964	0.264	0.184	1	SC_2C	SUMF1
0.00226197	0.156397	0.072	0.039	1	SC_2C	TAMM41
0.0022734	0.33787	0.091	0.037	1	SC_2C	AC073343.2
0.00228136	0.26204	0.13	0.074	1	SC_2C	SPATA13
0.00233798	0.0328409	0.417	0.296	1	SC_2C	ZFAND3
0.00234452	0.113029	0.166	0.1	1	SC_2C	PRMT2
0.00234476	0.144548	0.169	0.102	1	SC_2C	ANO10
0.00234809	0.02356	0.225	0.15	1	SC_2C	NPEPPS
0.00236532	0.303463	0.124	0.064	1	SC_2C	PTPRG-AS1
0.00237224	0.164536	0.144	0.086	1	SC_2C	SIK2
0.0023733	0.0838848	0.163	0.102	1	SC_2C	ECHDC1
0.00237831	0.2625	0.249	0.14	1	SC_2C	ASPH
0.00239295	0.0239885	0.028	0.016	1	SC_2C	TATDN3
0.00239593	0.132805	0.52	0.367	1	SC_2C	NAV1
0.00240289	0.281845	0.101	0.05	1	SC_2C	USP3-AS1
0.0024049	0.359636	0.156	0.074	1	SC_2C	SH3BGRL
0.00241642	0.193072	0.038	0.015	1	SC_2C	AC091045.1
0.00242055	0.400603	0.162	0.08	1	SC_2C	COLEC12
0.00242317	0.195406	0.024	0.01	1	SC_2C	DNAH9
0.00243378	0.312337	0.041	0.019	1	SC_2C	ZPLD1
0.00246324	0.00905555	0.029	0.018	1	SC_2C	SMNDC1
0.00246501	0.0164031	0.336	0.256	1	SC_2C	ROBO1
0.00246762	0.0828027	0.17	0.104	1	SC_2C	CHPT1
0.00247685	0.0107944	0.51	0.372	1	SC_2C	APBB2
0.00248883	0.043844	0.054	0.032	1	SC_2C	NAAA
0.00249505	0.235539	0.036	0.012	1	SC_2C	AC092802.1
0.00251594	0.102964	0.023	0.012	1	SC_2C	EIF2B2
0.00252179	0.102257	0.042	0.022	1	SC_2C	SRPK1
0.00252485	0.308969	0.038	0.012	1	SC_2C	MME-AS1
0.00252645	0.192546	0.023	0.007	1	SC_2C	GCA
0.00253204	0.0850551	0.081	0.05	1	SC_2C	PRIMPOL
0.00253699	0.023252	0.025	0.014	1	SC_2C	RSPH3
0.00254758	0.277415	0.042	0.013	1	SC_2C	AL359317.2
0.00255406	0.268789	0.063	0.026	1	SC_2C	NIBAN1
0.00257631	0.138821	0.013	0.004	1	SC_2C	SMAD1-AS2
0.00257631	0.104356	0.022	0.009	1	SC_2C	AC016644.1
0.00257631	0.0978203	0.016	0.007	1	SC_2C	KBTBD7
0.00257681	0.371361	0.048	0.011	1	SC_2C	AL357141.1
0.0025838	0.118928	0.203	0.132	1	SC_2C	ERBIN
0.0025871	0.0134972	0.113	0.071	1	SC_2C	WDR60
0.0025966	0.152234	0.084	0.045	1	SC_2C	ZNF559
0.00260112	0.0207001	0.019	0.011	1	SC_2C	LOXL3
0.00260309	0.134252	0.053	0.027	1	SC_2C	AP4E1
0.00261108	0.153166	0.179	0.109	1	SC_2C	PRKG1
0.00261777	0.121746	0.091	0.049	1	SC_2C	GBP2
0.00261782	0.202194	0.171	0.097	1	SC_2C	CTDSPL2
0.00262165	0.0374563	0.056	0.033	1	SC_2C	YPEL3
0.00264273	0.199964	0.035	0.014	1	SC_2C	AP000892.1
0.0026528	0.209756	0.37	0.23	1	SC_2C	JAK1
0.00265348	0.373339	0.039	0.006	1	SC_2C	AC025434.1
0.0026589	0.193374	0.063	0.032	1	SC_2C	CFAP36
0.00266895	0.0338682	0.165	0.111	1	SC_2C	FXR1
0.00267393	0.0380434	0.266	0.18	1	SC_2C	ZNF292
0.00267956	0.138635	0.036	0.016	1	SC_2C	LINC01580
0.00268401	0.145938	0.028	0.011	1	SC_2C	AC100839.2
0.00268507	0.05688	0.27	0.171	1	SC_2C	UBR2
0.00268562	0.0915956	0.354	0.232	1	SC_2C	FOXN3
0.00268719	0.0608744	0.037	0.023	1	SC_2C	MYOT
0.00269058	0.698911	0.09	0.029	1	SC_2C	BX284613.2
0.00271485	0.169718	0.04	0.017	1	SC_2C	SCD5
0.00272521	0.164951	0.032	0.013	1	SC_2C	MTRF1
0.00272617	0.355737	0.079	0.034	1	SC_2C	RBKS
0.0027269	0.315241	0.214	0.13	1	SC_2C	SULF1
0.00272755	0.168668	0.053	0.033	1	SC_2C	AL136441.1
0.00273012	0.105986	0.178	0.11	1	SC_2C	BICRAL
0.00273717	0.335534	0.038	0.009	1	SC_2C	RMDN2-AS1
0.00274602	0.141201	0.03	0.013	1	SC_2C	AC100763.1
0.00275549	0.084753	0.069	0.04	1	SC_2C	IP6K1
0.00275662	0.0383773	0.036	0.022	1	SC_2C	ZKSCAN8
0.0027582	0.102455	0.15	0.095	1	SC_2C	TRRAP
0.00277312	0.0505744	0.077	0.046	1	SC_2C	C1orf56
0.00279347	0.452767	0.208	0.099	1	SC_2C	AC083870.1
0.00280465	0.126819	0.13	0.075	1	SC_2C	EP300
0.00280522	0.0506744	0.3	0.206	1	SC_2C	KMT2E
0.00280934	0.0624993	0.028	0.014	1	SC_2C	USP19
0.0028157	0.256252	0.158	0.075	1	SC_2C	SH3PXD2A
0.00282443	0.157091	0.076	0.04	1	SC_2C	ZSCAN5A
0.00282918	0.500533	0.118	0.046	1	SC_2C	AL513164.1
0.00283554	0.401584	0.081	0.028	1	SC_2C	SYCP3
0.00283702	0.106884	0.736	0.562	1	SC_2C	NEAT1
0.00284298	0.00580436	0.065	0.043	1	SC_2C	CAAP1
0.00286157	0.0460589	0.126	0.081	1	SC_2C	PRKACB
0.00286173	0.0691888	0.073	0.045	1	SC_2C	PTPN9
0.00286473	0.00772753	0.235	0.162	1	SC_2C	SCAPER
0.00286853	0.169452	0.081	0.046	1	SC_2C	RHBDD1
0.00288239	0.318314	0.055	0.02	1	SC_2C	AMZ1
0.00288613	0.11477	0.047	0.026	1	SC_2C	WDTC1
0.00291908	0.0527466	0.076	0.047	1	SC_2C	XPNPEP3
0.00291913	0.217047	0.223	0.132	1	SC_2C	PHACTR2
0.00293023	0.260828	0.046	0.023	1	SC_2C	AQP4-AS1
0.00298185	0.231916	0.3	0.184	1	SC_2C	AEBP2
0.00299565	0.0233065	0.14	0.091	1	SC_2C	ACTN4
0.00301261	0.184799	0.101	0.052	1	SC_2C	ELOA-AS1
0.00301461	0.0554244	0.051	0.029	1	SC_2C	PMS2
0.00305158	0.160888	0.071	0.038	1	SC_2C	CAPS2
0.00305585	0.015717	0.153	0.104	1	SC_2C	ROCK1
0.00306726	0.0405566	0.044	0.028	1	SC_2C	FBXO21
0.00306853	0.227413	0.254	0.156	1	SC_2C	ASB3
0.00307424	0.112945	0.06	0.033	1	SC_2C	SKA2
0.00309085	0.164739	0.072	0.036	1	SC_2C	ITGB1BP1
0.00311537	0.256982	0.091	0.042	1	SC_2C	AC000065.1
0.00311688	0.409437	0.25	0.126	1	SC_2C	FOXP2
0.00313164	0.0598695	0.047	0.026	1	SC_2C	SWAP70
0.00313273	0.0542342	0.079	0.049	1	SC_2C	KLF7
0.00313679	0.189839	0.107	0.055	1	SC_2C	ITGA9-AS1
0.0031476	0.116555	0.07	0.039	1	SC_2C	FAM204A
0.00316967	0.0968575	0.078	0.047	1	SC_2C	IKBKB
0.00319587	0.0159445	0.072	0.047	1	SC_2C	FEZ2
0.00321706	0.192193	0.111	0.062	1	SC_2C	ARHGAP28
0.00322113	0.0641155	0.079	0.042	1	SC_2C	SFMBT2
0.00322668	0.292164	0.194	0.105	1	SC_2C	LINC00513
0.00323702	0.0668581	0.056	0.034	1	SC_2C	STAT1
0.00324546	0.065564	0.063	0.036	1	SC_2C	AL139021.1
0.00324699	0.270481	0.085	0.04	1	SC_2C	ZNF814
0.00325493	0.292645	0.137	0.064	1	SC_2C	KLHDC2
0.00327222	0.0447035	0.144	0.09	1	SC_2C	ATF7
0.00331956	0.116323	0.497	0.345	1	SC_2C	STAG1
0.00333517	0.0647803	0.25	0.167	1	SC_2C	KIAA1217
0.00335005	0.0825437	0.116	0.077	1	SC_2C	NDUFAF6
0.0033511	0.371963	0.073	0.026	1	SC_2C	CADM2-AS2
0.00335866	0.0409247	0.12	0.075	1	SC_2C	ZFYVE9
0.00337343	0.0502604	0.214	0.14	1	SC_2C	CPLANE1
0.00337677	0.00462064	0.113	0.072	1	SC_2C	WAPL
0.00338332	0.293734	0.176	0.086	1	SC_2C	CERCAM
0.00341418	0.0256042	0.158	0.108	1	SC_2C	DDX46
0.00341693	0.500441	0.087	0.028	1	SC_2C	HYMAI
0.0034978	0.0710143	0.101	0.058	1	SC_2C	CLK4
0.0035029	0.452528	0.135	0.058	1	SC_2C	GNG12-AS1
0.00350556	0.225331	0.073	0.034	1	SC_2C	C2orf88
0.00351039	0.253766	0.268	0.152	1	SC_2C	NUTM2A-AS1
0.00351491	0.261632	0.073	0.032	1	SC_2C	AC017002.5
0.00353583	0.145464	0.131	0.076	1	SC_2C	BTRC
0.00355855	0.0164667	0.356	0.257	1	SC_2C	RBFOX2
0.00357184	0.166268	0.056	0.026	1	SC_2C	AC011416.4
0.00358094	0.046743	0.092	0.055	1	SC_2C	ZYG11B
0.00358268	0.0453375	0.154	0.105	1	SC_2C	EHMT1
0.00359443	0.0681231	0.163	0.102	1	SC_2C	TIAM2
0.00360008	0.22445	0.069	0.034	1	SC_2C	AL365356.1
0.00360159	0.264021	0.063	0.024	1	SC_2C	AL049869.3
0.00361014	0.108136	0.048	0.025	1	SC_2C	COPS5
0.00365592	0.196123	0.076	0.037	1	SC_2C	MCUB
0.00366585	0.270241	0.081	0.039	1	SC_2C	AC079921.1
0.00368611	0.0414927	0.194	0.133	1	SC_2C	WAC
0.00368829	0.164152	0.09	0.047	1	SC_2C	ACVR1
0.00369219	0.179279	0.048	0.023	1	SC_2C	NPNT
0.00370238	0.0410479	0.044	0.028	1	SC_2C	TMEM164
0.00371179	0.360442	0.177	0.092	1	SC_2C	MINDY3
0.00371496	0.225662	0.035	0.012	1	SC_2C	TTC21B-AS1
0.00372084	0.201645	0.026	0.008	1	SC_2C	AC022601.1
0.00372084	0.121404	0.018	0.007	1	SC_2C	AL354809.1
0.00372128	0.139574	0.381	0.251	1	SC_2C	SETD5
0.00374374	0.0858178	0.067	0.038	1	SC_2C	TEX10
0.0037555	0.282649	0.022	0.003	1	SC_2C	ENTHD1
0.0037555	0.128253	0.018	0.005	1	SC_2C	AC119396.1
0.0037555	0.0586547	0.017	0.008	1	SC_2C	AC138956.2
0.00377643	0.189228	0.237	0.145	1	SC_2C	TBCK
0.00379528	0.140451	0.05	0.025	1	SC_2C	AL354696.2
0.00380267	0.258649	0.092	0.043	1	SC_2C	AC012358.3
0.00381935	0.0892475	0.042	0.023	1	SC_2C	TP53I3
0.00382129	0.0447013	0.337	0.225	1	SC_2C	APP
0.00386817	0.348104	0.075	0.03	1	SC_2C	DNAH14
0.00386817	0.309871	0.073	0.028	1	SC_2C	ZMYM4-AS1
0.0038905	0.0909385	0.036	0.02	1	SC_2C	ZNF766
0.00390333	0.209309	0.04	0.016	1	SC_2C	GLIPR1L1
0.0039054	0.118058	0.269	0.175	1	SC_2C	HERC4
0.00391145	0.40919	0.143	0.068	1	SC_2C	LINC01376
0.00391828	0.0884423	0.125	0.077	1	SC_2C	ANKRD13C
0.0039247	0.192167	0.218	0.13	1	SC_2C	ATF7IP
0.00392514	0.046816	0.063	0.039	1	SC_2C	C6orf62
0.00392988	0.151274	0.075	0.043	1	SC_2C	CADPS2
0.0039335	0.0252865	0.125	0.085	1	SC_2C	AFAP1L2
0.00394538	0.211268	0.099	0.045	1	SC_2C	TRMT10B
0.00396533	0.051934	0.166	0.102	1	SC_2C	CEP95
0.0039658	0.288144	0.098	0.046	1	SC_2C	ADAMTSL3
0.00397561	0.158926	0.04	0.017	1	SC_2C	CKMT2
0.00397738	0.149983	0.483	0.336	1	SC_2C	CDK8
0.00399641	0.380209	0.444	0.253	1	SC_2C	KANSL1
0.00401733	0.228842	0.153	0.081	1	SC_2C	FAXDC2
0.00402033	0.122348	0.057	0.033	1	SC_2C	DDX60L
0.00402416	0.0685253	0.079	0.044	1	SC_2C	ILRUN
0.00402938	0.0138286	0.281	0.191	1	SC_2C	SRRM2
0.0040295	0.0700172	0.142	0.089	1	SC_2C	CREB3L2
0.00403569	0.0364195	0.126	0.082	1	SC_2C	PSPC1
0.00407373	0.31267	0.035	0.011	1	SC_2C	NEDD9
0.00408053	0.309383	0.092	0.04	1	SC_2C	AC007666.2
0.00409146	0.313096	0.038	0.011	1	SC_2C	AC004594.1
0.00411527	0.419673	0.111	0.047	1	SC_2C	MYCBP2-AS1
0.00412542	0.427388	0.076	0.026	1	SC_2C	AL133480.1
0.00416975	0.376704	0.093	0.039	1	SC_2C	UGDH-AS1
0.00417562	0.0468982	0.024	0.013	1	SC_2C	CRTC2
0.0041849	0.0487068	0.307	0.206	1	SC_2C	BPTF
0.00419071	0.155244	0.118	0.068	1	SC_2C	SGK3
0.00419442	0.114216	0.1	0.058	1	SC_2C	IFT80
0.00422611	0.0676573	0.199	0.133	1	SC_2C	IQGAP1
0.00422742	0.0708818	0.023	0.015	1	SC_2C	LINC00907
0.00424017	0.160718	0.09	0.051	1	SC_2C	TSC1
0.00425624	0.083008	0.157	0.098	1	SC_2C	XPO4
0.00426228	0.00417897	0.02	0.011	1	SC_2C	ZNF484
0.00427956	0.107151	0.05	0.03	1	SC_2C	MIR181A2HG
0.00428483	0.0123365	0.095	0.059	1	SC_2C	HIVEP1
0.00428506	0.266321	0.037	0.01	1	SC_2C	AC093535.1
0.00431115	0.122902	0.031	0.014	1	SC_2C	AF107885.2
0.00431115	0.0295644	0.038	0.023	1	SC_2C	SERPINB9P1
0.00431319	0.510682	0.107	0.04	1	SC_2C	AC012085.2
0.00431505	0.00842421	0.02	0.012	1	SC_2C	E4F1
0.00431732	0.158722	0.029	0.011	1	SC_2C	RANBP3L
0.00436613	0.0462281	0.023	0.012	1	SC_2C	AC004112.1
0.00436715	0.160412	0.06	0.031	1	SC_2C	MSH2
0.00439353	0.00321635	0.069	0.042	1	SC_2C	DHX30
0.00439895	0.266084	0.035	0.009	1	SC_2C	TSPAN18
0.00440433	0.324645	0.032	0.005	1	SC_2C	LINC00710
0.00440433	0.21979	0.038	0.015	1	SC_2C	AC017028.1
0.0044087	0.259632	0.079	0.035	1	SC_2C	UBL3
0.00441544	0.348392	0.045	0.011	1	SC_2C	AP002961.1
0.00442322	0.159404	0.112	0.063	1	SC_2C	SIDT2
0.00442855	0.489134	0.172	0.074	1	SC_2C	AC004470.1
0.00443264	0.164729	0.037	0.017	1	SC_2C	AC025283.2
0.00448069	0.0422408	0.117	0.073	1	SC_2C	TAF1
0.00451013	0.0974915	0.03	0.012	1	SC_2C	MYRIP
0.00451186	0.182326	0.019	0.005	1	SC_2C	GPX2
0.00451186	0.124746	0.022	0.009	1	SC_2C	AL136988.2
0.00451186	0.119415	0.014	0.004	1	SC_2C	AL121933.2
0.00451186	0.0978309	0.015	0.006	1	SC_2C	FZD6
0.00451186	0.0962824	0.01	0.003	1	SC_2C	AC025419.1
0.00451186	0.0790848	0.011	0.004	1	SC_2C	DDN-AS1
0.00451186	0.074677	0.013	0.003	1	SC_2C	LACTB2-AS1
0.00451186	0.0619131	0.008	0.003	1	SC_2C	AL157369.1
0.00451186	0.0517695	0.017	0.01	1	SC_2C	SMPX
0.00451186	0.0394951	0.008	0.003	1	SC_2C	DCUN1D3
0.00451186	0.031184	0.015	0.009	1	SC_2C	DLEU7
0.00451186	0.0304864	0.019	0.011	1	SC_2C	AC012063.1
0.00451186	0.0255327	0.01	0.005	1	SC_2C	FAM161B
0.00451186	0.0100673	0.013	0.008	1	SC_2C	CBWD3
0.00451558	0.121766	0.033	0.015	1	SC_2C	MPV17
0.00452031	0.20813	0.129	0.071	1	SC_2C	RBL2
0.00454425	0.015029	0.126	0.082	1	SC_2C	ZNF654
0.0045536	0.0377932	0.089	0.052	1	SC_2C	PRPF3
0.00456642	0.229572	0.033	0.01	1	SC_2C	AC109597.1
0.00457592	0.192377	0.093	0.046	1	SC_2C	PPP1R10
0.00460458	0.116588	0.347	0.225	1	SC_2C	ATRX
0.00463501	0.200296	0.038	0.013	1	SC_2C	AC110795.1
0.00463501	0.150393	0.04	0.015	1	SC_2C	DLGAP1-AS1
0.00465248	0.0152464	0.14	0.095	1	SC_2C	USP8
0.00465448	0.0518242	0.391	0.27	1	SC_2C	AKT3
0.00467669	0.0350628	0.165	0.106	1	SC_2C	FUBP1
0.0047054	0.364531	0.372	0.226	1	SC_2C	MIR4435-2HG
0.00478098	0.0299256	0.099	0.061	1	SC_2C	FKTN
0.00478282	0.05181	0.069	0.046	1	SC_2C	CSGALNACT2
0.00482054	0.280358	0.126	0.068	1	SC_2C	USP45
0.00489822	0.275024	0.059	0.024	1	SC_2C	SPDYE1
0.00492065	0.0561779	0.155	0.102	1	SC_2C	PKNOX2
0.00493084	0.106118	0.275	0.182	1	SC_2C	PHF14
0.00497178	0.19793	0.061	0.03	1	SC_2C	AC104389.5
0.00498238	0.154563	0.233	0.147	1	SC_2C	MAP3K5
0.00500533	0.392999	0.117	0.051	1	SC_2C	AP001831.1
0.00503709	0.188591	0.06	0.03	1	SC_2C	AC008731.1
0.00506529	0.0643167	0.087	0.057	1	SC_2C	GSTCD
0.00512589	0.141582	0.202	0.122	1	SC_2C	ZNF609
0.00512982	0.506617	0.087	0.027	1	SC_2C	CEMIP
0.00513647	0.204592	0.083	0.044	1	SC_2C	TMEM184C
0.00513875	0.20291	0.252	0.149	1	SC_2C	XRN1
0.00514858	0.00523598	0.056	0.036	1	SC_2C	API5
0.00516719	0.124617	0.154	0.089	1	SC_2C	HDAC4
0.00518704	0.137978	0.396	0.262	1	SC_2C	AKAP13
0.00519394	0.141718	0.052	0.025	1	SC_2C	AL357153.2
0.00520914	0.00861032	0.04	0.027	1	SC_2C	UBA5
0.00520917	0.196336	0.099	0.05	1	SC_2C	TOM1L1
0.00525853	0.174522	0.201	0.12	1	SC_2C	MTREX
0.00526435	0.138751	0.083	0.043	1	SC_2C	ITPR2
0.00526933	0.113465	0.097	0.066	1	SC_2C	AL117190.2
0.00530109	0.14806	0.075	0.038	1	SC_2C	ATP10D
0.00532344	0.125036	0.102	0.056	1	SC_2C	PROS1
0.00532883	0.109701	0.155	0.093	1	SC_2C	SYNC
0.00533355	0.11947	0.124	0.076	1	SC_2C	REV1
0.00534125	0.144645	0.212	0.13	1	SC_2C	DOCK8
0.00535885	0.00436018	0.113	0.074	1	SC_2C	VAPA
0.00544683	0.486654	0.083	0.024	1	SC_2C	AP001599.1
0.00545791	0.189626	0.173	0.098	1	SC_2C	PHF3
0.0054778	0.17644	0.061	0.032	1	SC_2C	Z82217.1
0.00554281	0.0249859	0.047	0.031	1	SC_2C	ACAD9
0.00557497	0.086126	0.105	0.067	1	SC_2C	ZNF33A
0.00559776	0.0522068	0.159	0.096	1	SC_2C	MYOF
0.00560827	0.383116	0.071	0.027	1	SC_2C	AC025627.1
0.0056236	0.329147	0.109	0.05	1	SC_2C	HNMT
0.0056237	0.293828	0.107	0.048	1	SC_2C	ZNF506
0.00567154	0.042159	0.21	0.145	1	SC_2C	GSK3B
0.00568428	0.0587989	0.132	0.083	1	SC_2C	MSH3
0.0057109	0.11513	0.044	0.023	1	SC_2C	ELN
0.00573505	0.0847822	0.14	0.088	1	SC_2C	ZFYVE16
0.00574524	0.0485343	0.163	0.099	1	SC_2C	LYST
0.00575153	0.0954018	0.2	0.127	1	SC_2C	EVL
0.00575504	0.0514043	0.261	0.169	1	SC_2C	BABAM2
0.00578589	0.0359707	0.159	0.103	1	SC_2C	CCDC66
0.0058025	0.0698812	0.147	0.091	1	SC_2C	FAM13B
0.00583089	0.0993588	0.156	0.097	1	SC_2C	MICU2
0.00583461	0.025798	0.078	0.049	1	SC_2C	SEM1
0.00583817	0.187623	0.036	0.017	1	SC_2C	KCNMB2
0.00588126	0.160417	0.596	0.427	1	SC_2C	ZFPM2
0.00588171	0.0342746	0.057	0.033	1	SC_2C	BDNF-AS
0.00590799	0.106482	0.192	0.12	1	SC_2C	NEDD4L
0.00591326	0.311057	0.052	0.02	1	SC_2C	AL139815.1
0.00591989	0.221559	0.359	0.225	1	SC_2C	CCNY
0.00595378	0.10896	0.126	0.074	1	SC_2C	DENND6A
0.00598201	0.308053	0.046	0.012	1	SC_2C	AP001767.3
0.00598668	0.256474	0.171	0.093	1	SC_2C	DLEU1
0.00603618	0.0511943	0.178	0.117	1	SC_2C	DMXL1
0.00605512	0.177416	0.034	0.017	1	SC_2C	H2AFY2
0.00608909	0.115584	0.278	0.182	1	SC_2C	EXOC6B
0.00611529	0.233777	0.035	0.01	1	SC_2C	AL078602.1
0.00614508	0.144251	0.403	0.261	1	SC_2C	TNRC6B
0.0061537	0.114089	0.101	0.058	1	SC_2C	SS18
0.00617019	0.10958	0.097	0.059	1	SC_2C	PDE7A
0.00617458	0.10099	0.042	0.021	1	SC_2C	CIZ1
0.00619446	0.0926048	0.048	0.027	1	SC_2C	FLCN
0.00622412	0.0548264	0.12	0.071	1	SC_2C	OSMR
0.0062259	0.123064	0.132	0.078	1	SC_2C	ARMCX4
0.00623439	0.0427743	0.025	0.017	1	SC_2C	FBXL18
0.00625638	0.0185809	0.053	0.035	1	SC_2C	PLSCR1
0.0062773	0.0917043	0.02	0.01	1	SC_2C	NUP210L
0.00627979	0.0220371	0.064	0.04	1	SC_2C	MED6
0.00629237	0.241551	0.057	0.029	1	SC_2C	CCDC60
0.00630825	0.290402	0.204	0.114	1	SC_2C	ATM
0.00632473	0.298701	0.096	0.045	1	SC_2C	MEF2C-AS1
0.00633049	0.0576458	0.302	0.209	1	SC_2C	VAV3
0.00633537	0.121349	0.02	0.006	1	SC_2C	MORN4
0.00635557	0.330647	0.044	0.01	1	SC_2C	MYO1H
0.00636458	0.110427	0.018	0.007	1	SC_2C	AC098872.1
0.00639391	0.0204431	0.02	0.011	1	SC_2C	CLHC1
0.00641829	0.378237	0.193	0.1	1	SC_2C	NLGN4Y
0.00642337	0.0467548	0.026	0.015	1	SC_2C	LINC00159
0.00643361	0.120916	0.055	0.029	1	SC_2C	CTPS2
0.00645295	0.060486	0.022	0.01	1	SC_2C	AC015871.1
0.00646763	0.20713	0.118	0.059	1	SC_2C	RAD9A
0.00647636	0.0194416	0.17	0.111	1	SC_2C	RSF1
0.00648265	0.177834	0.018	0.002	1	SC_2C	EGFR-AS1
0.0064873	0.126554	0.048	0.025	1	SC_2C	AL603839.3
0.00649165	0.0924451	0.158	0.101	1	SC_2C	MTR
0.00655045	0.318997	0.045	0.013	1	SC_2C	USP12-AS1
0.00658276	0.0992539	0.141	0.081	1	SC_2C	IFT43
0.00658833	0.0845201	0.062	0.035	1	SC_2C	ZER1
0.00661136	0.0926094	0.324	0.218	1	SC_2C	BAZ2B
0.00661463	0.169432	0.146	0.086	1	SC_2C	CDKN1C
0.00663971	0.0611086	0.52	0.387	1	SC_2C	JMJD1C
0.00665721	0.118659	0.034	0.017	1	SC_2C	SETMAR
0.0066748	0.150612	0.035	0.017	1	SC_2C	SPDYE5
0.0067105	0.0383304	0.039	0.024	1	SC_2C	AL683813.1
0.00671539	0.0376019	0.057	0.037	1	SC_2C	DENR
0.00674324	0.0717148	0.05	0.03	1	SC_2C	BORCS5
0.00676187	0.0101083	0.045	0.027	1	SC_2C	PIP4P2
0.00676651	0.0976718	0.044	0.019	1	SC_2C	UCHL5
0.0068067	0.119058	0.075	0.042	1	SC_2C	FAM117A
0.00681279	0.712707	0.05	0.009	1	SC_2C	MROH9
0.0068244	0.0120829	0.028	0.017	1	SC_2C	AP5M1
0.00685416	0.187507	0.448	0.296	1	SC_2C	MBD5
0.00686347	0.152421	0.295	0.18	1	SC_2C	PPFIBP1
0.00688275	0.140584	0.034	0.014	1	SC_2C	MATR3.1
0.00689446	0.0640747	0.025	0.011	1	SC_2C	ZBTB20-AS3
0.00692256	0.150195	0.026	0.009	1	SC_2C	AC018557.1
0.00694924	0.328634	0.075	0.032	1	SC_2C	AC092574.2
0.00697702	0.0758137	0.045	0.026	1	SC_2C	TSNAX
0.00699742	0.0399799	0.265	0.186	1	SC_2C	ARGLU1
0.00700077	0.146271	0.029	0.01	1	SC_2C	EVA1A
0.00700077	0.0575904	0.032	0.016	1	SC_2C	MXD1
0.00701391	0.210732	0.088	0.047	1	SC_2C	AC026202.2
0.0070436	0.130752	0.085	0.044	1	SC_2C	CHIC2
0.00705849	0.113321	0.093	0.049	1	SC_2C	AL109824.1
0.0070614	0.125302	0.046	0.024	1	SC_2C	DHRS4-AS1
0.00706403	0.0100229	0.016	0.009	1	SC_2C	KCTD1
0.0070819	0.0877451	0.023	0.014	1	SC_2C	PEX7
0.00709263	0.101325	0.023	0.01	1	SC_2C	PRCD
0.00709649	0.0404853	0.03	0.016	1	SC_2C	WIPI1
0.0071172	0.107055	0.208	0.129	1	SC_2C	INVS
0.00712714	0.0190117	0.236	0.166	1	SC_2C	RUFY3
0.00714743	0.0872662	0.06	0.036	1	SC_2C	ZNF618
0.00715015	0.195514	0.024	0.005	1	SC_2C	AC105460.2
0.00717466	0.0297304	0.102	0.062	1	SC_2C	CRBN
0.00718666	0.26597	0.047	0.017	1	SC_2C	AC016493.1
0.00718976	0.0361369	0.06	0.039	1	SC_2C	GRB10
0.00720318	0.0902584	0.043	0.022	1	SC_2C	TMEM169
0.00721307	0.0145877	0.034	0.024	1	SC_2C	RASSF8-AS1
0.0072284	0.0215558	0.198	0.133	1	SC_2C	GIGYF2
0.00723008	0.210674	0.227	0.135	1	SC_2C	ZNF565
0.00723148	0.043115	0.113	0.073	1	SC_2C	WDR26
0.00725284	0.0470154	0.029	0.016	1	SC_2C	AL034405.1
0.00726335	0.0483836	0.06	0.037	1	SC_2C	CEP89
0.00726614	0.29638	0.041	0.015	1	SC_2C	AC010168.1
0.00727906	0.119627	0.166	0.098	1	SC_2C	AC005670.3
0.00728341	0.190525	0.128	0.069	1	SC_2C	WWP1
0.00728721	0.0959517	0.168	0.102	1	SC_2C	USP33
0.00729281	0.0250591	0.026	0.016	1	SC_2C	CCDC36
0.00730403	0.0322302	0.063	0.041	1	SC_2C	FBXO22
0.00731957	0.20134	0.035	0.013	1	SC_2C	RNF152
0.00731957	0.0261568	0.018	0.009	1	SC_2C	PRIM1
0.00732523	0.030869	0.027	0.013	1	SC_2C	CAMTA2
0.00733251	0.0618943	0.125	0.078	1	SC_2C	DMTF1
0.00733664	0.226819	0.217	0.119	1	SC_2C	LINC01091
0.00734609	0.44114	0.113	0.044	1	SC_2C	AP001442.1
0.00735478	0.0328606	0.024	0.016	1	SC_2C	CERS4
0.00737335	0.143332	0.024	0.009	1	SC_2C	AC093690.1
0.00739401	0.241647	0.061	0.025	1	SC_2C	AC106818.2
0.0074142	0.0146336	0.033	0.017	1	SC_2C	DPH7
0.00741453	0.235473	0.058	0.025	1	SC_2C	RGS17
0.00744039	0.104302	0.144	0.093	1	SC_2C	GARS-DT
0.00744355	0.17841	0.049	0.021	1	SC_2C	TMEM91
0.00744391	0.0891615	0.274	0.18	1	SC_2C	ELF2
0.00747046	0.0446496	0.183	0.12	1	SC_2C	UBE2K
0.00748197	0.189398	0.036	0.014	1	SC_2C	MAT2B
0.00750173	0.0622591	0.053	0.03	1	SC_2C	PAFAH1B2
0.00750621	0.00855913	0.071	0.046	1	SC_2C	FAM53B
0.00750934	0.167954	0.027	0.008	1	SC_2C	AL133334.1
0.00752167	0.342199	0.095	0.04	1	SC_2C	AL031428.1
0.0075322	0.0143221	0.281	0.194	1	SC_2C	PPP6R3
0.00755184	0.0857146	0.128	0.078	1	SC_2C	PPP2R2A
0.00756437	0.0690257	0.033	0.019	1	SC_2C	ZFAT
0.0076206	0.0944588	0.231	0.142	1	SC_2C	USP12
0.00764636	0.185494	0.231	0.138	1	SC_2C	RSRP1
0.00766527	0.0384438	0.049	0.029	1	SC_2C	APOOL
0.00766963	0.12815	0.087	0.052	1	SC_2C	ZDHHC20
0.00773354	0.108594	0.055	0.028	1	SC_2C	SRA1
0.00775411	0.0394656	0.052	0.032	1	SC_2C	BRCA1
0.00779069	0.433283	0.116	0.041	1	SC_2C	C12orf76
0.00782739	0.0912108	0.132	0.08	1	SC_2C	GPATCH2L
0.00785201	0.403695	0.098	0.04	1	SC_2C	OXNAD1
0.0079099	0.00207936	0.053	0.032	1	SC_2C	ATG13
0.00793347	0.377879	0.097	0.038	1	SC_2C	LNX1
0.00793649	0.198248	0.016	0.005	1	SC_2C	DCDC2B
0.00793649	0.169276	0.018	0.004	1	SC_2C	AL109628.2
0.00793649	0.158568	0.016	0.004	1	SC_2C	LNP1
0.00793649	0.14535	0.016	0.003	1	SC_2C	AL645504.1
0.00793649	0.137221	0.012	0.001	1	SC_2C	WASHC5-AS1
0.00793649	0.129828	0.012	0.002	1	SC_2C	AL589787.1
0.00793649	0.111463	0.01	0.002	1	SC_2C	AL391097.3
0.00793649	0.105699	0.017	0.005	1	SC_2C	AC130469.1
0.00793649	0.10539	0.016	0.005	1	SC_2C	BTBD18
0.00793649	0.0857744	0.01	0.002	1	SC_2C	AC122697.1
0.00793649	0.0790475	0.016	0.006	1	SC_2C	AC116428.1
0.00793649	0.0734677	0.012	0.004	1	SC_2C	SALRNA1
0.00793649	0.0668304	0.008	0.003	1	SC_2C	AC074212.1
0.00793649	0.0651925	0.013	0.005	1	SC_2C	DNAH6
0.00793649	0.0650241	0.015	0.007	1	SC_2C	FAM214B
0.00793649	0.0647089	0.014	0.005	1	SC_2C	AC084724.1
0.00793649	0.0594162	0.011	0.006	1	SC_2C	MFSD2B
0.00793649	0.0455852	0.015	0.007	1	SC_2C	SAMD9
0.00793649	0.0307388	0.015	0.008	1	SC_2C	AC097500.1
0.00793649	0.0306594	0.009	0.004	1	SC_2C	AL049637.1
0.00793649	0.00085143	0.008	0.005	1	SC_2C	ALDH16A1
0.00794463	0.28231	0.123	0.063	1	SC_2C	STARD13-AS
0.0079663	0.114229	0.258	0.165	1	SC_2C	GABPB1-AS1
0.00797768	0.335907	0.116	0.053	1	SC_2C	AL139317.5
0.00798535	0.0880048	0.07	0.041	1	SC_2C	PSMG4
0.00805574	0.0313066	0.048	0.029	1	SC_2C	AKAP11
0.0080603	0.272446	0.105	0.052	1	SC_2C	DNAJC9
0.00808048	0.118535	0.165	0.106	1	SC_2C	SLC20A2
0.00810219	0.0635562	0.182	0.12	1	SC_2C	SIL1
0.00810933	0.451575	0.101	0.038	1	SC_2C	RPA3
0.00812885	0.00193978	0.077	0.049	1	SC_2C	NPRL3
0.00814552	0.267273	0.11	0.05	1	SC_2C	MGAT5
0.00816708	0.0524201	0.079	0.048	1	SC_2C	SCAMP1
0.0081679	0.0216133	0.079	0.052	1	SC_2C	NHLRC2
0.00817813	0.249975	0.209	0.114	1	SC_2C	XRRA1
0.00818629	0.141359	0.095	0.052	1	SC_2C	AP001347.1
0.00820729	0.49196	0.066	0.027	1	SC_2C	AP001977.1
0.00824099	0.202104	0.561	0.399	1	SC_2C	ANTXR1
0.00826898	0.0552077	0.094	0.056	1	SC_2C	NBPF26
0.00835199	0.152756	0.057	0.031	1	SC_2C	SLC9B1
0.00839863	0.323038	0.127	0.061	1	SC_2C	LINC01111
0.00840282	0.210572	0.071	0.034	1	SC_2C	AC026704.1
0.00840312	0.100681	0.048	0.025	1	SC_2C	IL1R1
0.0084677	0.166149	0.16	0.097	1	SC_2C	LPAR1
0.0084804	0.246796	0.049	0.022	1	SC_2C	AL513188.1
0.00850286	0.185393	0.123	0.069	1	SC_2C	MINDY2
0.00851372	0.245613	0.058	0.024	1	SC_2C	CCDC28A
0.00859469	0.0273905	0.129	0.087	1	SC_2C	CAV1
0.00861112	0.014296	0.069	0.043	1	SC_2C	GANC
0.00863127	0.172514	0.074	0.037	1	SC_2C	AP000442.1
0.00864824	0.144892	0.093	0.06	1	SC_2C	TPD52
0.00866465	0.122924	0.077	0.044	1	SC_2C	EPG5
0.00869549	0.172373	0.155	0.096	1	SC_2C	ENTPD1-AS1
0.00871111	0.209439	0.091	0.048	1	SC_2C	MTERF1
0.00871164	0.252876	0.226	0.127	1	SC_2C	AL050309.1
0.00876161	0.152077	0.04	0.017	1	SC_2C	DTWD2
0.0088004	0.106994	0.054	0.028	1	SC_2C	ATP6V1H
0.0088084	0.0985211	0.059	0.033	1	SC_2C	ETV1
0.00881789	0.390696	0.127	0.054	1	SC_2C	TMEM241
0.00883075	0.0874327	0.051	0.028	1	SC_2C	DBNL
0.00884595	0.0553839	0.252	0.165	1	SC_2C	OGT
0.0088793	0.0900561	0.033	0.018	1	SC_2C	RNF215
0.00888808	0.0285779	0.131	0.085	1	SC_2C	RASA2
0.00896921	0.250158	0.051	0.025	1	SC_2C	AL355835.1
0.00898142	0.107449	0.044	0.021	1	SC_2C	C1RL
0.00902789	0.0507391	0.045	0.027	1	SC_2C	GOLM1
0.00903308	0.0993383	0.111	0.065	1	SC_2C	FCHO2
0.00907024	0.301717	0.097	0.048	1	SC_2C	UTP20
0.00909281	0.0927106	0.053	0.03	1	SC_2C	RFFL
0.00910197	0.213954	0.089	0.042	1	SC_2C	SPTLC3
0.00916181	0.179285	0.251	0.157	1	SC_2C	ZBTB7C
0.00918001	0.109518	0.103	0.061	1	SC_2C	MRC2
0.00918165	0.26666	0.178	0.096	1	SC_2C	MEF2C
0.00918353	0.144345	0.185	0.119	1	SC_2C	PROX1
0.00920115	0.086537	0.055	0.031	1	SC_2C	TGFB1
0.00928012	0.182107	0.194	0.112	1	SC_2C	FAM198B-AS1
0.0092859	0.124708	0.121	0.067	1	SC_2C	TMEM144
0.00930881	0.0551712	0.071	0.045	1	SC_2C	MCCC2
0.00932143	0.17991	0.091	0.049	1	SC_2C	INTS4
0.0094028	0.332697	0.057	0.023	1	SC_2C	AC022915.2
0.00942776	0.119236	0.098	0.058	1	SC_2C	EVC
0.00946136	0.000490316	0.283	0.202	1	SC_2C	ZMYM2
0.00947459	0.0847411	0.076	0.047	1	SC_2C	AC034195.1
0.00947718	0.0751764	0.066	0.039	1	SC_2C	ATG4B
0.00948104	0.0670684	0.361	0.245	1	SC_2C	GTDC1
0.00951706	0.0222018	0.113	0.074	1	SC_2C	CSPP1
0.00954185	0.278977	0.069	0.027	1	SC_2C	AC022872.1
0.00959778	0.190382	0.23	0.139	1	SC_2C	ZNF438
0.00960748	0.0364948	0.059	0.034	1	SC_2C	AC098829.1
0.00962183	0.137313	0.039	0.016	1	SC_2C	ELOA
0.0096287	0.206412	0.128	0.069	1	SC_2C	SLC25A26
0.0096472	0.00319716	0.583	0.436	1	SC_2C	NFIB
0.00965281	0.213529	0.261	0.162	1	SC_2C	TTTY14
0.00966074	0.285625	0.152	0.073	1	SC_2C	ABHD17B
0.00970874	0.161406	0.189	0.105	1	SC_2C	ATXN1
0.00976586	0.042298	0.212	0.138	1	SC_2C	ZNF280D
0.00977429	0.589929	0.087	0.029	1	SC_2C	OBI1-AS1
0.00981483	0.0630017	0.069	0.043	1	SC_2C	PIN4
0.00983519	0.00554096	0.036	0.026	1	SC_2C	DCAF1
0.00983519	0.00139159	0.028	0.02	1	SC_2C	PSMD4
0.00983753	0.127107	0.142	0.084	1	SC_2C	LYPLAL1
0.0099109	0.164113	0.072	0.038	1	SC_2C	SP2-AS1
0.00992791	0.030821	0.028	0.018	1	SC_2C	INPP5F
0.00996446	0.368781	0.075	0.028	1	SC_2C	LRP4-AS1
2.1835e-54	3.06258	0.557	0.06	7.99182e-50	SC_4	AC009041.2
1.94214e-49	4.09287	0.527	0.072	7.10844e-45	SC_4	EMC10
1.59663e-46	2.09748	0.696	0.21	5.84382e-42	SC_4	SLC24A2
2.77852e-36	1.56235	0.733	0.378	1.01697e-31	SC_4	MEGF10
1.0982e-32	2.25999	0.5	0.102	4.0195e-28	SC_4	SIRT2
2.89837e-31	1.93976	0.471	0.121	1.06083e-26	SC_4	EPHB1
1.2682e-27	1.79612	0.493	0.146	4.64173e-23	SC_4	GPM6B
1.4276e-27	1.8411	0.324	0.067	5.22516e-23	SC_4	LINC00472
1.91405e-27	1.67119	0.362	0.083	7.00563e-23	SC_4	KY
1.0615e-25	1.80279	0.356	0.081	3.8852e-21	SC_4	HS6ST2
1.65083e-25	1.09281	0.612	0.324	6.0422e-21	SC_4	NEB
7.01173e-25	1.51691	0.64	0.278	2.56636e-20	SC_4	SLF2
3.55715e-23	1.63672	0.398	0.13	1.30195e-18	SC_4	ZNF521
1.11093e-22	1.89268	0.275	0.059	4.06611e-18	SC_4	ADGRL3
1.5592e-22	1.74197	0.361	0.107	5.70683e-18	SC_4	PLCL2
2.19377e-22	1.24178	0.647	0.328	8.02943e-18	SC_4	RBFOX1
2.28311e-20	1.29902	0.441	0.172	8.35642e-16	SC_4	FGFR1
2.9996e-20	1.35879	0.478	0.234	1.09788e-15	SC_4	LINC00882
3.2357e-20	2.68009	0.372	0.083	1.1843e-15	SC_4	AC020909.2
7.98729e-19	1.08458	0.635	0.376	2.92343e-14	SC_4	ANKRD10
9.54871e-19	1.44588	0.47	0.21	3.49492e-14	SC_4	SOX6
1.53521e-18	1.92657	0.171	0.007	5.61903e-14	SC_4	COL24A1
4.96763e-18	1.57603	0.354	0.118	1.8182e-13	SC_4	SVIL
6.70089e-18	1.71337	0.357	0.101	2.45259e-13	SC_4	PRKG1
7.63231e-18	1.18765	0.345	0.126	2.7935e-13	SC_4	KCNQ5
9.6267e-18	0.547377	0.951	0.906	3.52347e-13	SC_4	CADM2
9.87982e-18	1.52008	0.206	0.045	3.61611e-13	SC_4	CTNNA3
4.19175e-17	1.22847	0.331	0.112	1.53422e-12	SC_4	RYR1
8.40503e-17	1.88892	0.158	0.002	3.07632e-12	SC_4	RGR
1.78869e-16	1.89847	0.17	0.003	6.54678e-12	SC_4	KANK4
3.68167e-16	1.602	0.237	0.05	1.34753e-11	SC_4	GLCCI1
5.00665e-16	1.42081	0.152	0.013	1.83249e-11	SC_4	SOX8
7.08259e-16	1.14074	0.253	0.088	2.5923e-11	SC_4	SLC38A6
7.66248e-16	1.66285	0.183	0.016	2.80455e-11	SC_4	PGBD5
8.20653e-16	1.64707	0.261	0.048	3.00367e-11	SC_4	ATP1A1
1.52109e-14	1.03662	0.368	0.165	5.56733e-10	SC_4	LDLRAD3
1.71557e-14	1.64074	0.206	0.024	6.27917e-10	SC_4	GALNT14
2.48499e-14	1.26442	0.266	0.087	9.09532e-10	SC_4	CCND2
2.87091e-14	1.05949	0.395	0.193	1.05078e-09	SC_4	ADK
3.74755e-14	0.744179	0.613	0.413	1.37164e-09	SC_4	TANC2
5.93558e-14	1.62303	0.243	0.046	2.17248e-09	SC_4	SLC12A2
1.07188e-13	1.12236	0.197	0.067	3.9232e-09	SC_4	WIPF1
2.01631e-13	1.81725	0.239	0.028	7.37989e-09	SC_4	PKIA
2.3489e-13	1.41769	0.156	0.019	8.59722e-09	SC_4	OTOF
3.5971e-13	1.02329	0.142	0.033	1.31658e-08	SC_4	MGLL
4.40289e-13	1.47497	0.202	0.048	1.6115e-08	SC_4	MTSS1
7.17601e-13	0.918884	0.543	0.32	2.62649e-08	SC_4	ANK2
9.30122e-13	1.19342	0.158	0.039	3.40434e-08	SC_4	MTHFD1L
1.53558e-12	0.74681	0.527	0.334	5.62037e-08	SC_4	TCF12
2.5274e-12	1.00706	0.116	0.022	9.25055e-08	SC_4	SERPINB9
2.71845e-12	1.02863	0.363	0.167	9.94981e-08	SC_4	STARD13
5.78624e-12	1.24156	0.124	0.016	2.11782e-07	SC_4	AL589935.1
6.06283e-12	1.82343	0.235	0.064	2.21906e-07	SC_4	ELMO1
1.86525e-11	0.97976	0.42	0.248	6.82699e-07	SC_4	AC015923.1
6.47236e-11	1.46463	0.148	0.02	2.36895e-06	SC_4	ARPP21
7.06413e-11	0.849348	0.149	0.046	2.58554e-06	SC_4	ACTN2
8.10072e-11	0.915833	0.511	0.272	2.96494e-06	SC_4	CHRNA1
8.88789e-11	0.775306	0.311	0.163	3.25306e-06	SC_4	PHLDB2
1.25858e-10	1.24154	0.343	0.132	4.60653e-06	SC_4	MAGI1
1.64287e-10	1.10275	0.324	0.127	6.01306e-06	SC_4	GSE1
1.67722e-10	0.870659	0.388	0.212	6.13879e-06	SC_4	RASSF4
2.26923e-10	0.989272	0.255	0.098	8.30562e-06	SC_4	CHD7
3.63283e-10	1.26126	0.12	0.009	1.32965e-05	SC_4	SYNDIG1
3.6507e-10	1.47941	0.113	0.004	1.33619e-05	SC_4	RASGEF1C
4.36662e-10	1.30436	0.103	0.005	1.59823e-05	SC_4	COL8A1
6.38595e-10	1.18835	0.218	0.064	2.33732e-05	SC_4	PLPPR1
8.60724e-10	0.961792	0.071	0.001	3.15034e-05	SC_4	LINC02367
1.26304e-09	1.14265	0.093	0.019	4.62284e-05	SC_4	NCAM2
1.32847e-09	0.70649	0.542	0.365	4.86232e-05	SC_4	TTN
1.45913e-09	0.943601	0.088	0.011	5.34057e-05	SC_4	SNTB1
1.47411e-09	0.68082	0.165	0.074	5.39538e-05	SC_4	FLNC
1.62114e-09	0.956902	0.435	0.223	5.93352e-05	SC_4	MNAT1
1.71565e-09	0.947865	0.176	0.051	6.27943e-05	SC_4	KLHL41
2.27485e-09	0.9218	0.33	0.162	8.32619e-05	SC_4	HIP1
2.39246e-09	1.12283	0.114	0.014	8.75663e-05	SC_4	PPM1H
2.78062e-09	1.72733	0.108	0.007	0.000101773	SC_4	SHISA9
3.3765e-09	0.299201	0.907	0.861	0.000123583	SC_4	ZBTB20
3.76898e-09	0.828786	0.272	0.128	0.000137948	SC_4	SMC6
4.65024e-09	0.865751	0.219	0.099	0.000170204	SC_4	RALGPS2
5.11902e-09	0.806939	0.343	0.168	0.000187361	SC_4	COL15A1
5.12518e-09	0.737711	0.332	0.185	0.000187587	SC_4	TMCC1
7.33338e-09	0.771302	0.179	0.069	0.000268409	SC_4	CAP2
7.77177e-09	1.0635	0.22	0.088	0.000284455	SC_4	PKP4
9.44024e-09	1.28493	0.111	0.015	0.000345522	SC_4	EML6
1.21194e-08	1.22943	0.088	0.009	0.00044358	SC_4	PKHD1
1.36781e-08	0.855715	0.128	0.035	0.000500634	SC_4	CCNG2
1.45783e-08	1.048	0.201	0.063	0.000533582	SC_4	GUCY1A2
1.89492e-08	1.10498	0.115	0.021	0.000693559	SC_4	FNDC5
1.91577e-08	0.619622	0.228	0.122	0.000701191	SC_4	CDH15
3.28479e-08	0.471127	0.529	0.369	0.00120226	SC_4	MYO18B
3.38616e-08	0.887032	0.1	0.025	0.00123937	SC_4	ITPRID2
3.66245e-08	0.869217	0.103	0.035	0.00134049	SC_4	MAP2
3.78899e-08	1.26098	0.212	0.073	0.00138681	SC_4	VSTM4
3.90317e-08	0.699722	0.172	0.08	0.0014286	SC_4	JARID2
3.95135e-08	0.849542	0.138	0.045	0.00144624	SC_4	DAPK1
4.26397e-08	0.59029	0.192	0.104	0.00156065	SC_4	NAV3
4.52749e-08	0.831955	0.138	0.048	0.00165711	SC_4	AGPAT5
4.86794e-08	0.887578	0.099	0.016	0.00178171	SC_4	PLXNA1
5.23212e-08	0.716506	0.081	0.021	0.00191501	SC_4	MARCKS
5.37204e-08	0.864399	0.13	0.039	0.00196622	SC_4	MYO10
5.59855e-08	0.768373	0.108	0.037	0.00204913	SC_4	TIAM1
5.88807e-08	1.12659	0.1	0.019	0.00215509	SC_4	SPON1
7.68327e-08	0.820938	0.288	0.16	0.00281215	SC_4	SPATA6
7.76854e-08	0.927689	0.088	0.011	0.00284336	SC_4	PKIA-AS1
8.86366e-08	0.958216	0.087	0.007	0.00324419	SC_4	RINL
9.13835e-08	1.05156	0.174	0.069	0.00334473	SC_4	ALDH1A2
1.00697e-07	0.687443	0.137	0.055	0.00368563	SC_4	FAM49B
1.22472e-07	0.653051	0.183	0.086	0.00448259	SC_4	MCU
1.24322e-07	1.01533	0.145	0.04	0.0045503	SC_4	LIMD1
1.36041e-07	1.09836	0.138	0.03	0.00497924	SC_4	MACROD1
1.54898e-07	0.863032	0.128	0.045	0.00566943	SC_4	TMEM72-AS1
1.78977e-07	1.00718	0.158	0.042	0.00655073	SC_4	ALPK3
1.8937e-07	0.863666	0.094	0.018	0.00693111	SC_4	PLS3
2.06845e-07	0.716308	0.195	0.085	0.00757073	SC_4	RRAS2
2.1685e-07	0.586221	0.294	0.182	0.00793693	SC_4	PLXNA2
2.18633e-07	0.971258	0.134	0.041	0.00800218	SC_4	DIO2
2.2275e-07	1.01748	0.069	0.002	0.00815289	SC_4	HNF1A-AS1
2.23743e-07	0.679974	0.112	0.041	0.00818923	SC_4	CTIF
2.28708e-07	0.830467	0.18	0.071	0.00837095	SC_4	TULP4
2.34766e-07	1.36069	0.13	0.024	0.00859266	SC_4	ACTC1
2.53686e-07	0.698717	0.062	0.007	0.00928516	SC_4	WSCD1
2.74169e-07	0.743587	0.115	0.038	0.0100349	SC_4	RET
2.89009e-07	0.837269	0.205	0.092	0.010578	SC_4	PHACTR1
2.94804e-07	0.604429	0.305	0.173	0.0107901	SC_4	RHOBTB3
2.96865e-07	0.971589	0.237	0.098	0.0108656	SC_4	AC010894.3
3.82809e-07	1.19552	0.105	0.007	0.0140112	SC_4	ST8SIA5
3.86539e-07	0.640252	0.043	0.003	0.0141477	SC_4	CXCL13
3.90144e-07	0.945549	0.12	0.03	0.0142797	SC_4	SLC29A1
4.16557e-07	1.04894	0.221	0.076	0.0152464	SC_4	JAM3
4.17498e-07	1.10029	0.137	0.035	0.0152808	SC_4	TMEM178B
4.97641e-07	0.753356	0.148	0.058	0.0182142	SC_4	AC002460.2
5.12773e-07	0.615721	0.145	0.064	0.018768	SC_4	CD9
5.49063e-07	0.228591	0.231	0.165	0.0200963	SC_4	MEF2A
6.12856e-07	0.717629	0.436	0.265	0.0224312	SC_4	AKAP9
6.35614e-07	0.394153	0.235	0.152	0.0232641	SC_4	GSK3B
6.9598e-07	0.594521	0.272	0.159	0.0254736	SC_4	RTN4
8.84257e-07	0.727715	0.088	0.023	0.0323647	SC_4	SEMA6B
9.07768e-07	0.947908	0.071	0.014	0.0332252	SC_4	LINC02511
1.00857e-06	0.850807	0.082	0.016	0.0369148	SC_4	AP000721.2
1.03346e-06	0.840522	0.053	0.008	0.0378257	SC_4	ELMO1-AS1
1.17475e-06	0.875996	0.088	0.017	0.042997	SC_4	BCAM
1.22759e-06	0.726016	0.124	0.039	0.0449311	SC_4	CORO7
1.28401e-06	0.704489	0.148	0.064	0.0469961	SC_4	NCK2
1.40089e-06	0.515653	0.285	0.183	0.051274	SC_4	USP47
1.66402e-06	0.52021	0.509	0.379	0.0609048	SC_4	FAM110B
1.68199e-06	0.732541	0.067	0.014	0.0615624	SC_4	BIN1
1.88748e-06	1.00701	0.124	0.03	0.0690837	SC_4	COL21A1
2.03139e-06	0.479177	0.171	0.095	0.0743509	SC_4	FAM193B
2.52215e-06	0.891752	0.097	0.02	0.0923132	SC_4	MYPN
2.74352e-06	0.734992	0.31	0.17	0.100416	SC_4	RAPH1
2.82867e-06	0.60737	0.184	0.092	0.103532	SC_4	ATP2B1
3.05439e-06	0.660984	0.251	0.135	0.111794	SC_4	PPP1R12B
3.28551e-06	0.563632	0.111	0.047	0.120253	SC_4	PACS2
3.60174e-06	0.602734	0.401	0.256	0.131827	SC_4	WDFY2
4.0933e-06	1.01526	0.169	0.048	0.149819	SC_4	DMPK
4.6831e-06	1.14394	0.115	0.028	0.171406	SC_4	CCDC141
4.84082e-06	0.988412	0.066	0.004	0.177179	SC_4	AC004870.4
5.03459e-06	0.673315	0.056	0.006	0.184271	SC_4	PPFIA4
5.09382e-06	0.723294	0.062	0.009	0.186439	SC_4	DLL1
5.89628e-06	0.201801	0.066	0.041	0.21581	SC_4	GAS1
5.97877e-06	0.813405	0.203	0.105	0.218829	SC_4	CLSTN2
6.75705e-06	0.68624	0.265	0.133	0.247315	SC_4	PDLIM3
7.55547e-06	0.546724	0.212	0.122	0.276538	SC_4	GALNT17
8.24491e-06	0.491963	0.431	0.315	0.301772	SC_4	MACF1
8.44107e-06	0.848052	0.112	0.029	0.308952	SC_4	CDC42EP3
8.59605e-06	0.90306	0.063	0.005	0.314624	SC_4	AC090403.1
9.06827e-06	0.539315	0.056	0.015	0.331908	SC_4	LINC01237
9.33971e-06	0.839749	0.217	0.096	0.341843	SC_4	BEST3
9.34479e-06	0.727669	0.053	0.005	0.342029	SC_4	CASZ1
9.96956e-06	0.591466	0.556	0.42	0.364896	SC_4	CDK6
1.01301e-05	0.688556	0.235	0.121	0.370771	SC_4	ARHGEF7
1.04407e-05	0.476378	0.035	0.001	0.382139	SC_4	FGD3
1.09938e-05	0.481289	0.231	0.141	0.402383	SC_4	LARGE1
1.1162e-05	0.748575	0.065	0.012	0.408542	SC_4	NES
1.15368e-05	0.5999	0.131	0.058	0.422257	SC_4	LIMCH1
1.17924e-05	0.482282	0.043	0.008	0.431615	SC_4	ESYT3
1.18999e-05	0.431424	0.142	0.082	0.435548	SC_4	YEATS2
1.25393e-05	0.423519	0.62	0.484	0.45895	SC_4	CDH13
1.27927e-05	0.633208	0.325	0.192	0.468227	SC_4	CTNND1
1.28606e-05	0.734854	0.062	0.009	0.470709	SC_4	JAG2
1.33304e-05	0.969987	0.078	0.01	0.487905	SC_4	TNNT2
1.34689e-05	0.654652	0.126	0.057	0.492976	SC_4	ANGPTL1
1.3558e-05	0.86347	0.218	0.104	0.496238	SC_4	AC093879.1
1.37162e-05	0.524968	0.132	0.061	0.502026	SC_4	TPD52
1.4381e-05	0.753911	0.247	0.125	0.52636	SC_4	CCSER2
1.4541e-05	0.590717	0.058	0.011	0.532215	SC_4	FSCN1
1.53049e-05	0.579993	0.185	0.101	0.560174	SC_4	SEMA6A-AS1
1.53187e-05	0.602554	0.21	0.115	0.560678	SC_4	ADGRA3
1.54075e-05	0.575073	0.044	0.006	0.563929	SC_4	AC067969.1
1.618e-05	0.727714	0.05	0	0.592204	SC_4	LINC02473
1.70661e-05	0.364532	0.085	0.052	0.624635	SC_4	CRPPA
1.70705e-05	0.477594	0.277	0.182	0.624797	SC_4	GOLGA8A
1.77301e-05	0.534028	0.087	0.039	0.64894	SC_4	LRRN1
1.8066e-05	0.807224	0.054	0.002	0.661232	SC_4	FAM222A-AS1
1.85526e-05	0.292235	0.226	0.173	0.679045	SC_4	ARHGEF12
1.87269e-05	0.739172	0.121	0.048	0.685422	SC_4	TMEM117
1.89249e-05	0.490679	0.185	0.104	0.692671	SC_4	COPG2
2.60259e-05	0.496163	0.036	0.002	0.952574	SC_4	ADORA1
2.70854e-05	0.775979	0.123	0.04	0.991352	SC_4	ZNF556
2.78006e-05	0.981469	0.087	0.019	1	SC_4	LRRTM3
2.80012e-05	0.276789	0.034	0.012	1	SC_4	RTKN2
2.84433e-05	0.717824	0.147	0.061	1	SC_4	SIX1
2.84763e-05	0.659651	0.072	0.021	1	SC_4	TBC1D14
3.12601e-05	0.464121	0.033	0.004	1	SC_4	CASS4
3.40636e-05	0.691518	0.186	0.09	1	SC_4	MAML2
3.5043e-05	0.813213	0.088	0.015	1	SC_4	FXYD6
3.93496e-05	0.774741	0.135	0.056	1	SC_4	NTN1
4.05184e-05	0.311306	0.39	0.289	1	SC_4	SNHG14
4.11773e-05	0.913315	0.265	0.151	1	SC_4	TNIK
4.23262e-05	0.811662	0.086	0.02	1	SC_4	ALK
4.38791e-05	0.579025	0.058	0.012	1	SC_4	ADAMTS19
4.6031e-05	0.799057	0.116	0.037	1	SC_4	ATP1A1-AS1
4.61822e-05	0.416598	0.679	0.539	1	SC_4	NCOA1
4.64824e-05	0.415188	0.435	0.314	1	SC_4	PARD3
4.65945e-05	0.657939	0.056	0.008	1	SC_4	SIX4
4.70806e-05	0.408919	0.376	0.264	1	SC_4	ROBO1
4.80859e-05	0.558583	0.103	0.051	1	SC_4	USP54
4.81945e-05	0.26004	0.093	0.06	1	SC_4	GTF2IRD1
5.33811e-05	0.288705	0.273	0.205	1	SC_4	LRRFIP1
5.40977e-05	0.909594	0.045	0	1	SC_4	NDST4
5.40977e-05	0.676291	0.049	0.001	1	SC_4	NEU4
5.60516e-05	0.70504	0.121	0.042	1	SC_4	ZNRF1
5.83163e-05	0.523533	0.088	0.035	1	SC_4	AC079382.2
6.33478e-05	0.35134	0.412	0.309	1	SC_4	DTNA
6.37204e-05	0.45374	0.39	0.291	1	SC_4	OLFML2B
6.46649e-05	0.400804	0.071	0.032	1	SC_4	CCDC60
6.48919e-05	0.694854	0.061	0.012	1	SC_4	TTYH2
6.62974e-05	0.537842	0.059	0.019	1	SC_4	COBL
6.6928e-05	0.576169	0.055	0.011	1	SC_4	AC131568.1
6.8715e-05	0.793786	0.058	0.007	1	SC_4	SLC4A4
6.89885e-05	0.261871	0.049	0.025	1	SC_4	RNH1
7.10893e-05	0.109457	0.205	0.165	1	SC_4	GBF1
7.14988e-05	0.584309	0.055	0.014	1	SC_4	FRAS1
7.39756e-05	0.707766	0.136	0.054	1	SC_4	SLC44A1
7.51407e-05	0.269509	0.049	0.026	1	SC_4	STARD7
7.64396e-05	0.495044	0.195	0.113	1	SC_4	ZNF827
7.65337e-05	0.599349	0.077	0.023	1	SC_4	SUSD1
7.84068e-05	0.194574	0.323	0.27	1	SC_4	ZBTB20-AS5
7.90017e-05	1.10807	0.475	0.301	1	SC_4	DLG2
8.46145e-05	0.641909	0.085	0.028	1	SC_4	CCDC90B
8.68447e-05	0.495435	0.088	0.036	1	SC_4	PPP1R14B
8.6935e-05	0.739077	0.147	0.058	1	SC_4	SOX4
9.03469e-05	0.661943	0.239	0.134	1	SC_4	DENND1A
9.36491e-05	0.609174	0.033	0.005	1	SC_4	SORCS1
9.36491e-05	0.489002	0.027	0	1	SC_4	ADGRA1
0.000101485	0.10443	0.069	0.051	1	SC_4	RBM28
0.000102503	0.307781	0.127	0.091	1	SC_4	SFRP4
0.000104526	1.03366	0.147	0.048	1	SC_4	C1QTNF3
0.000115853	0.575349	0.077	0.022	1	SC_4	GYS1
0.000116113	0.536447	0.062	0.02	1	SC_4	TEX2
0.000120228	0.657497	0.417	0.243	1	SC_4	ITGA7
0.000124864	0.343786	0.056	0.026	1	SC_4	L1CAM
0.000126092	0.639892	0.068	0.017	1	SC_4	C10orf90
0.000126927	0.715145	0.061	0.01	1	SC_4	AC092969.1
0.000128272	0.621092	0.087	0.036	1	SC_4	AC119674.1
0.000132799	0.659782	0.047	0.005	1	SC_4	CELA2B
0.000133235	0.353337	0.358	0.272	1	SC_4	RBFOX2
0.000135816	0.580835	0.063	0.017	1	SC_4	AC105114.2
0.000136047	0.613691	0.119	0.057	1	SC_4	LAMA5
0.000142395	0.442512	0.131	0.067	1	SC_4	ZC2HC1A
0.000142757	0.159594	0.038	0.027	1	SC_4	TNFRSF19
0.00014616	0.466816	0.07	0.036	1	SC_4	MSRA
0.000149166	0.692701	0.333	0.199	1	SC_4	TTC3
0.00015497	0.532234	0.093	0.04	1	SC_4	WRNIP1
0.000157405	0.550465	0.208	0.132	1	SC_4	LINC01515
0.000158265	0.725574	0.25	0.125	1	SC_4	SEMA6A
0.000159633	0.697887	0.198	0.099	1	SC_4	FAM184A
0.000162991	0.360546	0.038	0.011	1	SC_4	DSCAML1
0.00016652	0.855847	0.095	0.024	1	SC_4	CEP97
0.000170253	0.449893	0.063	0.02	1	SC_4	PLXNB1
0.000172813	0.719276	0.138	0.059	1	SC_4	MYO9B
0.000173065	0.14221	0.057	0.042	1	SC_4	MEF2D
0.000181203	0.490764	0.035	0.003	1	SC_4	MPPED2
0.000184171	1.13769	0.087	0.008	1	SC_4	ERBB3
0.000186866	0.592568	0.048	0.006	1	SC_4	AL136114.1
0.000193226	0.49281	0.048	0.013	1	SC_4	AL512662.2
0.000196425	0.662873	0.054	0.01	1	SC_4	AC008591.1
0.000198312	0.541386	0.27	0.185	1	SC_4	ADAM10
0.000198857	0.699263	0.054	0.005	1	SC_4	RUBCNL
0.000203659	0.410512	0.206	0.133	1	SC_4	RAPGEF6
0.00020943	0.666459	0.075	0.016	1	SC_4	SPSB4
0.000212172	0.409658	0.164	0.104	1	SC_4	GLI3
0.000218371	0.628611	0.057	0.009	1	SC_4	CASP9
0.0002279	0.311379	0.21	0.143	1	SC_4	BCAR3
0.000230242	0.50336	0.166	0.095	1	SC_4	BACH1
0.000234253	0.541461	0.149	0.076	1	SC_4	ABCC4
0.000239816	0.413789	0.032	0.005	1	SC_4	AC083902.1
0.000250318	0.415019	0.237	0.163	1	SC_4	KIF1B
0.000254164	0.748323	0.154	0.069	1	SC_4	STARD13-AS
0.000256359	0.107929	0.389	0.342	1	SC_4	SSH2
0.000257528	0.733573	0.143	0.065	1	SC_4	PAAF1
0.00027536	0.551753	0.178	0.099	1	SC_4	GLRX
0.000276873	0.515191	0.073	0.027	1	SC_4	CHKA
0.000281151	0.557347	0.036	0.003	1	SC_4	MYOG
0.000282338	0.612254	0.192	0.097	1	SC_4	SERPINF1
0.000284081	0.549294	0.13	0.07	1	SC_4	IL7
0.00029711	0.533697	0.039	0.003	1	SC_4	B3GALT5
0.000298013	0.716772	0.116	0.041	1	SC_4	CHD3
0.000299008	0.619504	0.111	0.044	1	SC_4	MTSS2
0.000307829	0.510841	0.237	0.148	1	SC_4	ABI2
0.000309014	0.382071	0.033	0.007	1	SC_4	AC023095.1
0.000310683	0.604379	0.046	0.007	1	SC_4	STK10
0.000311782	0.676717	0.069	0.019	1	SC_4	INPP4B
0.000319411	0.527254	0.211	0.132	1	SC_4	FCHSD2
0.000321529	0.665154	0.164	0.091	1	SC_4	ZBTB20-AS1
0.000326388	0.625596	0.074	0.017	1	SC_4	MRAS
0.000345468	0.183939	0.101	0.07	1	SC_4	RPL10A
0.000349372	0.53899	0.111	0.053	1	SC_4	FOXN2
0.00035758	0.381866	0.043	0.013	1	SC_4	ME1
0.000358811	0.298372	0.132	0.087	1	SC_4	UBAC2
0.000378198	0.616498	0.203	0.109	1	SC_4	ADAMTS9
0.000399135	0.451273	0.048	0.011	1	SC_4	MAGI1-AS1
0.000400803	0.687178	0.068	0.018	1	SC_4	WNT5B
0.000401391	0.366426	0.076	0.034	1	SC_4	MOB1B
0.000410742	0.579913	0.039	0.002	1	SC_4	AL357146.1
0.000412831	0.508347	0.068	0.025	1	SC_4	MYLK
0.00041468	0.319018	0.033	0.007	1	SC_4	FLRT1
0.00041468	0.247789	0.025	0.01	1	SC_4	PRC1-AS1
0.000419567	1.00835	0.119	0.038	1	SC_4	LPAR4
0.000421125	0.301287	0.205	0.144	1	SC_4	SCFD2
0.000429381	0.72074	0.113	0.045	1	SC_4	AP001825.1
0.000429488	0.58973	0.158	0.075	1	SC_4	MLXIP
0.000435108	0.180115	0.213	0.168	1	SC_4	SRPK2
0.0004537	0.348608	0.197	0.127	1	SC_4	LARS
0.000466128	0.234649	0.234	0.187	1	SC_4	FBXL17
0.000474508	0.255519	0.087	0.057	1	SC_4	TACC2
0.000479493	0.588956	0.724	0.55	1	SC_4	CELF2
0.000482072	0.761966	0.087	0.031	1	SC_4	LINC01121
0.000487855	0.346519	0.023	0.001	1	SC_4	KCNH2
0.000490899	0.465702	0.045	0.02	1	SC_4	NXPE3
0.000491504	0.239911	0.408	0.318	1	SC_4	REV3L
0.000501298	0.471095	0.1	0.043	1	SC_4	GAS7
0.000506555	0.0671137	0.059	0.046	1	SC_4	ZNF678
0.000521362	0.139437	0.051	0.039	1	SC_4	AL138787.2
0.000524054	0.280707	0.034	0.013	1	SC_4	DUSP27
0.000537157	0.24077	0.052	0.028	1	SC_4	CRIP2
0.000538796	0.645951	0.157	0.083	1	SC_4	TBC1D16
0.000556085	0.363576	0.044	0.017	1	SC_4	PROM1
0.000570509	0.298963	0.483	0.406	1	SC_4	DDX5
0.000605845	0.0383354	0.092	0.08	1	SC_4	STK17B
0.000622553	0.29589	0.637	0.543	1	SC_4	DMD
0.000638304	0.354585	0.147	0.092	1	SC_4	BMERB1
0.000643134	0.63724	0.071	0.019	1	SC_4	TMEM189
0.000643698	0.332221	0.089	0.06	1	SC_4	RALY
0.000645742	0.417592	0.28	0.204	1	SC_4	AEBP2
0.000652181	1.04948	0.096	0.013	1	SC_4	DSCAM
0.000660425	0.285006	0.055	0.03	1	SC_4	IQCH
0.000663522	0.680385	0.085	0.031	1	SC_4	GNAO1
0.000687167	0.280249	0.029	0.012	1	SC_4	KIFC3
0.000689876	0.512236	0.066	0.023	1	SC_4	SMC1B
0.000700473	0.67292	0.189	0.087	1	SC_4	SGMS1
0.000716541	0.332207	0.215	0.151	1	SC_4	ZNF565
0.000720258	0.482486	0.147	0.083	1	SC_4	TMEM123
0.000738257	0.51698	0.169	0.097	1	SC_4	MAT2A
0.000743576	0.129118	0.272	0.222	1	SC_4	VPS13B
0.000752368	0.642905	0.102	0.035	1	SC_4	FAM13C
0.000753709	0.500205	0.153	0.086	1	SC_4	CELF2-AS2
0.000758079	0.245178	0.048	0.029	1	SC_4	OSBPL10
0.000759747	0.649468	0.12	0.053	1	SC_4	AK5
0.00076008	0.523714	0.129	0.075	1	SC_4	EYA1
0.000784507	0.473304	0.071	0.034	1	SC_4	NBPF1
0.000822517	0.29506	0.056	0.024	1	SC_4	PURB
0.000846524	0.739041	0.111	0.039	1	SC_4	GPC1
0.000847757	0.437042	0.028	0.002	1	SC_4	CHADL
0.000847757	0.39211	0.027	0.001	1	SC_4	AC011455.1
0.000847757	0.392026	0.029	0.004	1	SC_4	MYOD1
0.000847757	0.360122	0.029	0.004	1	SC_4	TMCC2
0.000861494	0.276593	0.031	0.012	1	SC_4	SSUH2
0.000863349	0.612472	0.044	0.005	1	SC_4	AC092674.1
0.00086542	0.336028	0.082	0.046	1	SC_4	TSC22D1
0.000865913	0.53605	0.096	0.042	1	SC_4	IQSEC1
0.000876286	0.395777	0.039	0.013	1	SC_4	TNK2
0.000886722	0.19718	0.11	0.078	1	SC_4	BTG1
0.00090108	0.330287	0.106	0.069	1	SC_4	TMCC3
0.000905743	0.368434	0.237	0.161	1	SC_4	NCOR2
0.000919191	0.485607	0.06	0.019	1	SC_4	GUK1
0.00092512	0.599057	0.059	0.011	1	SC_4	PLEKHG1
0.000928361	0.527098	0.062	0.016	1	SC_4	SCRIB
0.000935685	0.0537165	0.05	0.038	1	SC_4	LARP7
0.000956328	0.0518315	0.045	0.028	1	SC_4	UBA52
0.000964041	0.366986	0.058	0.027	1	SC_4	ARSB
0.000982812	0.360292	0.052	0.025	1	SC_4	AC093157.1
0.0009999	0.168613	0.173	0.129	1	SC_4	ZNF407
0.00101692	0.893109	0.119	0.041	1	SC_4	EFTUD2
0.00104013	0.388552	0.066	0.027	1	SC_4	AC009505.1
0.0010404	0.441584	0.271	0.178	1	SC_4	KIAA1217
0.00107097	0.511824	0.079	0.032	1	SC_4	ETV5
0.00108094	0.0820528	0.065	0.053	1	SC_4	OXNAD1
0.00115404	0.438618	0.059	0.024	1	SC_4	RBP1
0.00120285	0.284095	0.258	0.193	1	SC_4	DPH6
0.00120333	0.806374	0.184	0.086	1	SC_4	GOLGA8B
0.00120451	0.617572	0.092	0.035	1	SC_4	NKAIN3
0.00121185	0.139034	0.031	0.018	1	SC_4	MAP2K6
0.00121759	0.316975	0.023	0.008	1	SC_4	CYB5A
0.00122912	0.513497	0.038	0.005	1	SC_4	SUSD5
0.0012386	0.4715	0.061	0.023	1	SC_4	SERPINB9P1
0.00126098	0.286703	0.039	0.016	1	SC_4	VASH2
0.00132486	0.495123	0.059	0.02	1	SC_4	AC092640.1
0.00133427	0.492722	0.127	0.067	1	SC_4	ANTXR2
0.00133932	0.704462	0.089	0.03	1	SC_4	FRMD4B
[truncated: 1,810 more rows]

## Sheet: d. Myofibers
Seurat FindAllMarkers signficant marker genes distinguishing Myofiber subpopulations
p_val	avg_log2FC	% of Subpopulation	% of all other Myofibers	p_val_adj	Subpopulation	gene
0	1.28597	0.103	0.008	0	Immature fibers	MYBPH
0	2.56938	0.196	0.01	0	Immature fibers	MYH8
0	0.973951	0.136	0.015	0	Immature fibers	AC087457.1
0	1.33117	0.105	0.018	0	Immature fibers	AC093425.1
0	1.28504	0.137	0.019	0	Immature fibers	LINC02397
0	1.29552	0.124	0.019	0	Immature fibers	RMDN2
0	1.07922	0.104	0.019	0	Immature fibers	TNNT2
0	2.7978	0.296	0.02	0	Immature fibers	COL19A1
0	1.4733	0.103	0.02	0	Immature fibers	LSAMP
0	0.951386	0.101	0.02	0	Immature fibers	SRGAP2
0	1.37216	0.1	0.02	0	Immature fibers	SORBS2
0	0.891625	0.106	0.021	0	Immature fibers	MIR181A1HG
0	2.89923	0.346	0.022	0	Immature fibers	DCLK1
0	1.95666	0.103	0.022	0	Immature fibers	2022-03-01
0	1.04177	0.115	0.023	0	Immature fibers	XRCC4
0	1.56673	0.172	0.026	0	Immature fibers	ITGA9
0	0.901799	0.125	0.026	0	Immature fibers	DOCK9
0	1.12686	0.146	0.03	c	Immature fibers	HSPG2
0	2.28703	0.325	0.031	0	Immature fibers	CHRNA1
0	1.12957	0.169	0.032	0	Immature fibers	GCNT1
0	1.43376	0.161	0.033	0	Immature fibers	C2orf27A
0	0.98723	0.14	0.034	0	Immature fibers	CDC42EP3
0	0.843106	0.139	0.034	0	Immature fibers	LINCMD1
0	1.00128	0.138	0.034	0	Immature fibers	ERBB3
0	1.33531	0.196	0.036	0	Immature fibers	MUSK
0	2.0137	0.264	0.038	0	Immature fibers	PLCE1
0	1.05044	0.167	0.038	0	Immature fibers	AP000331.1
0	1.09679	0.186	0.049	0	Immature fibers	KLHL29
0	1.23672	0.19	0.05	0	Immature fibers	SASH1
0	1.35812	0.173	0.05	0	Immature fibers	LINC00882
0	1.49768	0.185	0.051	0	Immature fibers	COL24A1
0	1.72909	0.284	0.052	0	Immature fibers	ACTC1
0	1.67469	0.236	0.052	0	Immature fibers	ANTXR1
0	1.5909	0.27	0.056	0	Immature fibers	MYOF
0	1.31906	0.204	0.057	0	Immature fibers	KCNN3
0	1.7539	0.272	0.058	0	Immature fibers	CHRNG
0	1.0062	0.189	0.058	0	Immature fibers	PVT1
0	1.49666	0.194	0.06	0	Immature fibers	MDM2
0	1.48983	0.26	0.069	0	Immature fibers	PCA3
0	1.05493	0.206	0.071	0	Immature fibers	RAPH1
0	2.81996	0.339	0.074	0	Immature fibers	MYH3
0	1.79498	0.239	0.086	0	Immature fibers	PTPRD
0	1.43296	0.365	0.108	0	Immature fibers	ANKRD1
0	1.47895	0.338	0.118	0	Immature fibers	CALD1
0	1.93613	0.44	0.149	0	Immature fibers	PRUNE2
0	1.23567	0.341	0.15	0	Immature fibers	LIMA1
0	2.56373	0.574	0.159	0	Immature fibers	RUNX1
0	1.78135	0.431	0.162	0	Immature fibers	NCAM1
0	1.33242	0.434	0.194	0	Immature fibers	CELF2
0	1.51366	0.428	0.195	0	Immature fibers	ARHGAP24
0	1.16189	0.433	0.24	0	Immature fibers	CASQ2
0	1.64964	0.507	0.311	0	Immature fibers	LAMA2
1.27531e-304	1.112	0.46	0.274	4.66775e-300	Immature fibers	MACF1
4.38856e-298	0.924637	0.659	0.483	1.60626e-293	Immature fibers	AC108734.4
5.2053e-297	1.13352	0.348	0.176	1.90519e-292	Immature fibers	TRIM55
1.85517e-289	1.41459	0.186	0.067	6.7901e-285	Immature fibers	RNLS
1.12424e-288	1.01923	0.506	0.327	4.11484e-284	Immature fibers	LMO7
4.08102e-286	0.974192	0.172	0.057	1.49369e-281	Immature fibers	PLEKHA5
5.12599e-286	1.28954	0.217	0.085	1.87616e-281	Immature fibers	MAML2
1.3323e-285	1.27855	0.105	0.025	4.87634e-281	Immature fibers	LINC01358
4.37651e-284	0.856329	0.103	0.024	1.60185e-279	Immature fibers	MYO10
1.87053e-270	1.25599	0.278	0.131	6.84634e-266	Immature fibers	ARHGAP28
1.78799e-268	0.737186	0.111	0.028	6.54422e-264	Immature fibers	MYLK
9.22446e-262	0.878258	0.152	0.049	3.37624e-257	Immature fibers	DMPK
7.02668e-261	1.29257	0.288	0.138	2.57184e-256	Immature fibers	ASTN2
3.38207e-260	0.968314	0.135	0.041	1.23787e-255	Immature fibers	LDLRAD3
4.09666e-258	1.14564	0.161	0.055	1.49942e-253	Immature fibers	NAV2
1.74025e-257	1.09188	0.264	0.121	6.36949e-253	Immature fibers	ZEB2
9.10269e-243	0.942919	0.153	0.052	3.33167e-238	Immature fibers	KIF2A
2.03868e-233	0.883269	0.218	0.092	7.46177e-229	Immature fibers	RAB11FIP3
3.1933e-232	0.897371	0.164	0.059	1.16878e-227	Immature fibers	ABI2
5.00596e-226	0.526676	0.958	0.97	1.83223e-221	Immature fibers	NEAT1
8.86018e-226	0.783769	0.146	0.05	3.24291e-221	Immature fibers	PKD2
7.8766e-225	0.996976	0.137	0.046	2.88291e-220	Immature fibers	FBXL7
1.77104e-219	2.235	0.234	0.112	6.48219e-215	Immature fibers	CLSTN2
2.84063e-216	1.01975	0.372	0.218	1.0397e-211	Immature fibers	TENM3
1.9532e-210	0.908125	0.146	0.053	7.14889e-206	Immature fibers	WDR27
1.76751e-207	1.0227	0.234	0.111	6.46926e-203	Immature fibers	SLC7A6
2.2176e-207	0.903915	0.14	0.05	8.11662e-203	Immature fibers	ITGA3
1.41085e-206	0.990576	0.198	0.086	5.16386e-202	Immature fibers	ADAM23
3.75984e-200	0.990967	0.277	0.143	1.37614e-195	Immature fibers	RAD51B
1.97955e-199	0.912478	0.296	0.156	7.24534e-195	Immature fibers	ZNF385D
4.04937e-196	0.784782	0.219	0.1	1.48211e-191	Immature fibers	AC083870.1
3.33847e-191	0.705214	0.107	0.033	1.22191e-186	Immature fibers	XG
2.58332e-190	0.754871	0.127	0.044	9.45522e-186	Immature fibers	DOCK1
8.38537e-189	0.896057	0.238	0.116	3.06913e-184	Immature fibers	SH3PXD2A
7.73062e-187	0.809899	0.23	0.11	2.82949e-182	Immature fibers	CLCN5
2.02245e-178	0.798449	0.113	0.038	7.40237e-174	Immature fibers	GRAMD1B
6.38065e-176	0.856515	0.161	0.067	2.33538e-171	Immature fibers	ANXA2
2.40877e-173	0.693896	0.13	0.048	8.81634e-169	Immature fibers	TEAD4
7.3299e-172	0.757375	0.106	0.035	2.68282e-167	Immature fibers	TSHZ2
4.9975e-168	0.885559	0.134	0.051	1.82914e-163	Immature fibers	ENOX1
3.96731e-164	0.824713	0.264	0.143	1.45207e-159	Immature fibers	GALNT17
1.35075e-157	0.808773	0.237	0.123	4.94388e-153	Immature fibers	CCDC39
1.90305e-156	0.876511	0.301	0.176	6.96535e-152	Immature fibers	GSE1
2.99298e-156	0.866633	0.353	0.223	1.09546e-151	Immature fibers	UTRN
1.00014e-155	0.56926	0.112	0.04	3.66062e-151	Immature fibers	HMGN1
1.33535e-153	0.689964	0.108	0.038	4.88753e-149	Immature fibers	H19
1.88607e-152	0.795475	0.122	0.047	6.90319e-148	Immature fibers	MIR4435-2HG
5.63476e-152	0.77478	0.422	0.288	2.06238e-147	Immature fibers	ANKRD10
4.59358e-149	0.700258	0.217	0.11	1.6813e-144	Immature fibers	ASAP1
2.15749e-148	0.816762	0.296	0.174	7.89664e-144	Immature fibers	AGAP1
3.5123e-148	0.703472	0.126	0.05	1.28554e-143	Immature fibers	MSC-AS1
1.14053e-146	0.781213	0.141	0.058	4.17446e-142	Immature fibers	MEG8
2.9348e-144	0.568583	0.143	0.06	1.07417e-139	Immature fibers	AKNAD1
4.29081e-144	1.03891	0.177	0.086	1.57048e-139	Immature fibers	MAST4
4.37212e-144	0.841438	0.252	0.141	1.60024e-139	Immature fibers	FAM13C
9.64015e-143	0.95269	0.261	0.149	3.52839e-138	Immature fibers	HMBOX1
1.53608e-141	0.751862	0.555	0.429	5.6222e-137	Immature fibers	PARD3
3.13309e-141	0.844991	0.134	0.056	1.14674e-136	Immature fibers	MAMDC2
2.72611e-140	0.62251	0.12	0.047	9.97783e-136	Immature fibers	LINC00342
3.42862e-138	0.703935	0.107	0.04	1.25491e-133	Immature fibers	NPNT
4.06821e-136	0.598226	0.111	0.043	1.48901e-131	Immature fibers	CCDC141
9.88314e-131	0.633699	0.139	0.061	3.61733e-126	Immature fibers	PRKAG3
5.43099e-129	0.673154	0.255	0.146	1.9878e-124	Immature fibers	PREPL
6.97875e-129	0.72391	0.114	0.046	2.55429e-124	Immature fibers	SDK1
3.3457e-128	0.804886	0.246	0.14	1.22456e-123	Immature fibers	TMEM178B
2.47732e-127	0.72841	0.343	0.221	9.06723e-123	Immature fibers	GLG1
7.34105e-127	0.349247	0.466	0.311	2.6869e-122	Immature fibers	TNNT3
2.50897e-126	0.796359	0.165	0.08	9.18307e-122	Immature fibers	BICD1
1.03445e-125	0.676752	0.102	0.04	3.7862e-121	Immature fibers	FAT4
6.11962e-125	0.633149	0.128	0.055	2.23984e-120	Immature fibers	UCK2
3.08294e-124	0.630501	0.187	0.095	1.12839e-119	Immature fibers	FAM49B
2.69126e-123	0.705724	0.131	0.058	9.85028e-119	Immature fibers	CDH15
3.27935e-123	0.746748	0.25	0.144	1.20027e-118	Immature fibers	VMP1
1.33123e-122	0.671009	0.37	0.245	4.87243e-118	Immature fibers	EGF
2.0971e-119	0.623164	0.219	0.121	7.6756e-115	Immature fibers	TGFB2
2.01112e-118	0.675991	0.165	0.082	7.36088e-114	Immature fibers	AEBP2
3.47406e-118	0.582828	0.117	0.049	1.27154e-113	Immature fibers	KCNQ4
6.04204e-116	0.631155	0.141	0.065	2.21145e-111	Immature fibers	CTDSPL
1.32558e-115	0.789459	0.309	0.199	4.85175e-111	Immature fibers	PTPRK
2.0358e-114	0.883943	0.355	0.246	7.45123e-110	Immature fibers	OSBPL6
1.15895e-112	0.929013	0.176	0.094	4.24188e-108	Immature fibers	PDGFC
3.92318e-111	0.733959	0.341	0.229	1.43592e-106	Immature fibers	RYR3
3.87654e-110	0.691911	0.134	0.063	1.41885e-105	Immature fibers	SETD7
1.661e-109	0.54519	0.158	0.078	6.07943e-105	Immature fibers	PPM1H
1.78763e-109	0.471188	0.108	0.045	6.54289e-105	Immature fibers	MYH9
1.12271e-107	0.63579	0.201	0.111	4.10925e-103	Immature fibers	ACTN4
1.01101e-105	0.708041	0.292	0.19	3.7004e-101	Immature fibers	EIF4E2
1.13945e-105	0.634453	0.169	0.088	4.1705e-101	Immature fibers	PLXNA2
1.91757e-105	0.599885	0.161	0.082	7.01851e-101	Immature fibers	SLC9A9
1.6031e-103	0.526683	0.636	0.545	5.8675e-99	Immature fibers	ARPP21
9.90442e-103	0.825671	0.178	0.098	3.62512e-98	Immature fibers	MPP6
8.50784e-102	0.78646	0.126	0.059	3.11395e-97	Immature fibers	PRKD1
3.11835e-100	0.544851	0.132	0.063	1.14135e-95	Immature fibers	IFT43
8.89237e-100	0.657332	0.111	0.05	3.2547e-95	Immature fibers	L3MBTL4
1.29248e-98	0.562469	0.119	0.055	4.73061e-94	Immature fibers	P2RY14
8.93033e-98	0.641766	0.153	0.08	3.26859e-93	Immature fibers	SLC7A6OS
3.80456e-97	0.534645	0.131	0.063	1.39251e-92	Immature fibers	PTPRS
1.98518e-96	0.642632	0.221	0.132	7.26598e-92	Immature fibers	TNS3
2.17735e-96	0.769654	0.168	0.089	7.96931e-92	Immature fibers	MEG3
3.81137e-96	0.563103	0.194	0.109	1.395e-91	Immature fibers	MAP4K4
5.25718e-96	0.538348	0.136	0.067	1.92418e-91	Immature fibers	LRRC8B
1.00655e-95	0.523534	0.105	0.046	3.68407e-91	Immature fibers	SESN3
6.89512e-95	0.645248	0.329	0.225	2.52368e-90	Immature fibers	HECTD4
8.31784e-94	0.700614	0.248	0.156	3.04441e-89	Immature fibers	SNTB1
5.45096e-93	0.562994	0.145	0.073	1.99511e-88	Immature fibers	MED12L
5.47117e-93	0.680518	0.11	0.051	2.0025e-88	Immature fibers	AL158195.1
5.62979e-93	0.713587	0.581	0.503	2.06056e-88	Immature fibers	TP63
1.63687e-92	0.488331	0.16	0.084	5.99109e-88	Immature fibers	ABHD2
2.04218e-92	0.579563	0.125	0.061	7.47457e-88	Immature fibers	GLS
2.4908e-92	0.659781	0.152	0.08	9.11658e-88	Immature fibers	AHDC1
1.2287e-91	0.897719	0.302	0.207	4.49717e-87	Immature fibers	INPP4B
1.72357e-91	0.649148	0.225	0.136	6.30844e-87	Immature fibers	GABPB1-AS1
4.64879e-90	0.72179	0.155	0.084	1.7015e-85	Immature fibers	CALM1
6.68703e-90	0.672077	0.138	0.071	2.44752e-85	Immature fibers	AFAP1L1
8.29535e-89	0.659129	0.101	0.046	3.03618e-84	Immature fibers	NCKAP5
3.20314e-87	0.693122	0.216	0.132	1.17238e-82	Immature fibers	CPLANE1
3.46375e-87	0.509407	0.154	0.082	1.26777e-82	Immature fibers	KIF13B
3.48018e-87	0.501023	0.121	0.059	1.27378e-82	Immature fibers	LRRN1
1.07798e-86	0.408712	0.105	0.048	3.94551e-82	Immature fibers	PPFIA4
6.89256e-85	0.454724	0.124	0.061	2.52275e-80	Immature fibers	LINC02250
2.0206e-84	0.799652	0.134	0.071	7.39561e-80	Immature fibers	ADARB1
7.36873e-84	0.681728	0.105	0.049	2.69703e-79	Immature fibers	PPP1R14C
1.13746e-83	0.563329	0.138	0.072	4.16323e-79	Immature fibers	KIAA1671
3.9269e-82	0.576239	0.136	0.071	1.43728e-77	Immature fibers	ANKRD36C
4.66383e-82	0.639102	0.27	0.179	1.70701e-77	Immature fibers	RABGAP1L
8.11772e-82	0.547738	0.173	0.098	2.97117e-77	Immature fibers	MAP3K14
2.51098e-81	0.622503	0.3	0.206	9.19045e-77	Immature fibers	PLCG2
7.75158e-81	0.575926	0.192	0.114	2.83716e-76	Immature fibers	CBLB
2.65485e-79	0.648921	0.155	0.087	9.71701e-75	Immature fibers	MCC
1.16431e-78	0.473658	0.137	0.072	4.26149e-74	Immature fibers	KCNB1
1.82453e-78	0.720415	0.143	0.079	6.67795e-74	Immature fibers	ARHGAP42
1.48851e-77	0.461208	0.267	0.175	5.44811e-73	Immature fibers	TTLL11
1.54623e-77	0.685972	0.382	0.29	5.65937e-73	Immature fibers	PPM1L
1.61128e-74	0.541256	0.221	0.139	5.89746e-70	Immature fibers	FAM13A
1.84092e-73	0.454407	0.101	0.049	6.73794e-69	Immature fibers	AMPD3
2.07808e-73	0.502418	0.257	0.17	7.606e-69	Immature fibers	VCL
7.93818e-73	0.625897	0.341	0.25	2.90545e-68	Immature fibers	MTSS1
2.62647e-71	0.494413	0.114	0.058	9.61314e-67	Immature fibers	ERGIC1
6.24965e-71	0.605695	0.752	0.732	2.28743e-66	Immature fibers	RBFOX1
8.08779e-70	0.637154	0.275	0.191	2.96021e-65	Immature fibers	WSB1
4.53782e-69	0.543175	0.191	0.118	1.66089e-64	Immature fibers	RAPGEF1
6.67695e-69	0.429181	0.143	0.08	2.44383e-64	Immature fibers	ATP2B4
1.73851e-68	0.62248	0.173	0.104	6.36313e-64	Immature fibers	SRPK3
2.6307e-68	0.41079	0.139	0.077	9.62864e-64	Immature fibers	LINC00702
3.26806e-68	0.546926	0.179	0.109	1.19614e-63	Immature fibers	BLCAP
2.19748e-67	0.479257	0.154	0.089	8.04301e-63	Immature fibers	GOLGA8A
3.94571e-66	0.511379	0.133	0.073	1.44417e-61	Immature fibers	CERS6
6.61848e-66	0.53956	0.109	0.057	2.42243e-61	Immature fibers	ZSWIM6
2.03894e-65	0.624699	0.143	0.082	7.46274e-61	Immature fibers	MEGF10
2.24777e-65	0.528237	0.431	0.344	8.22708e-61	Immature fibers	SYNE1
4.24414e-65	0.494295	0.3	0.212	1.5534e-60	Immature fibers	STRN3
1.08262e-64	0.549515	0.151	0.089	3.96248e-60	Immature fibers	FER
7.35599e-64	0.480081	0.25	0.169	2.69237e-59	Immature fibers	BRWD1
8.00277e-64	0.347696	0.121	0.065	2.9291e-59	Immature fibers	SLC39A10
8.76721e-64	0.550275	0.167	0.101	3.20889e-59	Immature fibers	SPTBN1
8.94656e-64	0.488679	0.165	0.099	3.27453e-59	Immature fibers	RREB1
2.20246e-63	0.425549	0.114	0.06	8.06121e-59	Immature fibers	FLNC-AS1
6.3646e-63	0.558708	0.431	0.343	2.32951e-58	Immature fibers	FLRT2
1.71189e-62	0.58993	0.145	0.085	6.2657e-58	Immature fibers	ARHGAP32
8.06251e-62	0.541324	0.173	0.106	2.95096e-57	Immature fibers	ASCC3
8.85376e-62	0.519791	0.129	0.073	3.24057e-57	Immature fibers	SLC44A2
1.04139e-61	0.50013	0.161	0.097	3.8116e-57	Immature fibers	RNF217
1.57347e-61	0.595641	0.214	0.142	5.75904e-57	Immature fibers	FCHSD2
1.8564e-61	0.448757	0.103	0.053	6.79461e-57	Immature fibers	STARD13-AS
1.44732e-60	0.422163	0.182	0.113	5.29733e-56	Immature fibers	ZNF556
4.16073e-60	0.553746	0.341	0.256	1.52287e-55	Immature fibers	LARGE1
1.72451e-59	0.623267	0.111	0.061	6.31188e-55	Immature fibers	ABCC4
1.10924e-58	0.495732	0.336	0.253	4.05994e-54	Immature fibers	CSNK1A1
2.81088e-57	0.536146	0.204	0.135	1.02881e-52	Immature fibers	STON2
3.70036e-56	0.460528	0.12	0.068	1.35437e-51	Immature fibers	AGPAT5
6.90968e-56	0.512709	0.251	0.176	2.52901e-51	Immature fibers	MTR
6.92981e-56	0.531609	0.397	0.32	2.53638e-51	Immature fibers	BEST3
2.43678e-55	0.398203	0.113	0.063	8.91887e-51	Immature fibers	CCDC18-AS1
3.88873e-55	0.353688	0.128	0.074	1.42331e-50	Immature fibers	SLC3A1
6.01432e-55	0.456893	0.269	0.191	2.2013e-50	Immature fibers	BIN1
1.33037e-54	0.487581	0.302	0.222	4.86929e-50	Immature fibers	PTK2
1.37047e-54	0.5138	0.223	0.152	5.01606e-50	Immature fibers	CACNB1
1.80728e-54	0.55213	0.119	0.068	6.61483e-50	Immature fibers	AHNAK
1.80944e-54	0.539413	0.211	0.143	6.62271e-50	Immature fibers	PADI2
3.65055e-54	0.581454	0.168	0.107	1.33614e-49	Immature fibers	SNHG25
5.04509e-54	0.477043	0.103	0.056	1.84655e-49	Immature fibers	DAPK1
2.31963e-53	0.449248	0.115	0.065	8.49006e-49	Immature fibers	TSPAN3
6.69704e-53	0.392034	0.142	0.086	2.45118e-48	Immature fibers	TYW1B
1.39457e-51	0.535444	0.146	0.09	5.10427e-47	Immature fibers	ANGPT2
9.02793e-51	0.454602	0.296	0.22	3.30431e-46	Immature fibers	TMEM108
1.71921e-50	0.463727	0.269	0.195	6.29249e-46	Immature fibers	REEP1
2.22235e-50	0.429826	0.178	0.116	8.13403e-46	Immature fibers	RABGEF1
2.47561e-50	0.522936	0.273	0.2	9.06097e-46	Immature fibers	ARHGAP10
2.61021e-50	0.553615	0.218	0.151	9.55362e-46	Immature fibers	AC007319.1
4.40917e-49	0.474032	0.106	0.06	1.6138e-44	Immature fibers	IL32
4.56027e-49	0.46838	0.157	0.1	1.6691e-44	Immature fibers	SLC35F5
6.96617e-49	0.530332	0.17	0.111	2.54969e-44	Immature fibers	COL5A2
1.47126e-48	0.413161	0.188	0.125	5.38497e-44	Immature fibers	GPSM2
4.60773e-48	0.454903	0.199	0.135	1.68647e-43	Immature fibers	CDK5RAP2
1.02448e-47	0.736512	0.109	0.064	3.74972e-43	Immature fibers	TENT5A
2.55664e-47	0.667605	0.322	0.259	9.35756e-43	Immature fibers	COL4A3
3.12703e-47	0.396509	0.132	0.08	1.14452e-42	Immature fibers	TBC1D22A
5.98616e-47	0.438057	0.112	0.066	2.19099e-42	Immature fibers	GPC1
6.37745e-47	0.424283	0.214	0.149	2.33421e-42	Immature fibers	CENPP
9.51007e-47	0.346162	0.111	0.064	3.48078e-42	Immature fibers	ATXN7L1
9.97921e-46	0.422323	0.115	0.068	3.65249e-41	Immature fibers	AC243964.3
1.01966e-45	0.490154	0.284	0.214	3.73207e-41	Immature fibers	EPHB1
1.23133e-45	0.416642	0.108	0.063	4.50679e-41	Immature fibers	SEPTIN9
2.00559e-45	0.406164	0.339	0.262	7.34065e-41	Immature fibers	EIF4G3
2.61675e-45	0.550143	0.136	0.085	9.57758e-41	Immature fibers	WWTR1
5.12322e-45	0.401258	0.191	0.129	1.87515e-40	Immature fibers	TFCP2
1.17602e-44	0.659693	0.249	0.186	4.30436e-40	Immature fibers	FOXO1
3.49103e-44	0.374023	0.278	0.204	1.27775e-39	Immature fibers	ITGA7
5.60596e-44	0.390012	0.118	0.071	2.05184e-39	Immature fibers	AGBL3
6.09123e-44	0.42907	0.343	0.266	2.22945e-39	Immature fibers	PTCHD1-AS
8.03187e-44	0.469394	0.208	0.147	2.93975e-39	Immature fibers	TULP4
1.783e-43	0.611837	0.21	0.149	6.52597e-39	Immature fibers	STARD13
1.8274e-43	0.412256	0.243	0.175	6.68846e-39	Immature fibers	SUPT3H
2.39528e-43	0.363537	0.132	0.082	8.76698e-39	Immature fibers	TTC14
2.48501e-43	0.612506	0.318	0.254	9.09537e-39	Immature fibers	FGGY
3.07458e-43	0.438683	0.223	0.16	1.12533e-38	Immature fibers	CD99
3.64063e-43	0.346842	0.101	0.058	1.33251e-38	Immature fibers	AP000787.1
3.8694e-43	0.356489	0.147	0.094	1.41624e-38	Immature fibers	SSH1
8.98602e-43	0.400223	0.297	0.223	3.28897e-38	Immature fibers	AMOTL1
1.08823e-42	0.553379	0.197	0.137	3.98305e-38	Immature fibers	GNAS
3.11046e-42	0.488987	0.312	0.243	1.13846e-37	Immature fibers	RIN2
4.02265e-42	0.311973	0.119	0.072	1.47233e-37	Immature fibers	STRN
1.17768e-41	0.389195	0.16	0.106	4.31044e-37	Immature fibers	PXN
2.87146e-41	0.438887	0.235	0.171	1.05098e-36	Immature fibers	NF1
3.8966e-41	0.361881	0.104	0.061	1.42619e-36	Immature fibers	PRKCE
5.27189e-41	0.334008	0.593	0.558	1.92956e-36	Immature fibers	MYO18B
1.44264e-40	0.39868	0.141	0.091	5.28019e-36	Immature fibers	SLC38A6
3.03684e-40	0.410931	0.23	0.167	1.11151e-35	Immature fibers	GTDC1
4.31114e-40	0.414912	0.148	0.097	1.57792e-35	Immature fibers	EHBP1
1.76164e-39	0.413787	0.133	0.085	6.44778e-35	Immature fibers	RAP1GDS1
7.13994e-39	0.351677	0.174	0.118	2.61329e-34	Immature fibers	SNHG5
5.68707e-38	0.404135	0.158	0.106	2.08152e-33	Immature fibers	KLC1
9.46923e-38	0.270056	0.264	0.194	3.46583e-33	Immature fibers	LINC01505
1.10034e-37	0.461695	0.164	0.112	4.02736e-33	Immature fibers	TMTC1
2.39844e-37	0.364651	0.11	0.068	8.77852e-33	Immature fibers	ZNF521
3.28759e-37	0.372357	0.325	0.256	1.20329e-32	Immature fibers	USP9Y
4.90273e-37	0.342217	0.162	0.109	1.79445e-32	Immature fibers	PUM3
4.97171e-37	0.45557	0.194	0.139	1.81969e-32	Immature fibers	AHCYL2
5.31396e-37	0.370912	0.101	0.061	1.94496e-32	Immature fibers	NNAT
8.11758e-37	0.383751	0.203	0.145	2.97111e-32	Immature fibers	TTC7B
1.0354e-36	0.449356	0.121	0.077	3.78967e-32	Immature fibers	PFKFB3
1.90982e-36	0.419005	0.163	0.112	6.99015e-32	Immature fibers	PSAP
4.03757e-36	0.489377	0.104	0.064	1.47779e-31	Immature fibers	PRICKLE1
4.42602e-36	0.3201	0.174	0.12	1.61997e-31	Immature fibers	KIF9-AS1
1.30882e-35	0.572472	0.184	0.133	4.7904e-31	Immature fibers	IGFN1
2.02535e-35	0.290234	0.118	0.075	7.413e-31	Immature fibers	RIMKLB
2.29278e-35	1.22683	0.236	0.184	8.3918e-31	Immature fibers	WWOX
2.49921e-35	0.429915	0.125	0.082	9.14737e-31	Immature fibers	TTTY10
3.3628e-35	0.356762	0.188	0.133	1.23082e-30	Immature fibers	RUFY3
4.09868e-35	0.396399	0.357	0.289	1.50016e-30	Immature fibers	TCF4
4.38271e-35	0.346859	0.143	0.095	1.60412e-30	Immature fibers	TASOR2
4.72058e-35	0.387018	0.181	0.128	1.72778e-30	Immature fibers	SNX29
5.52743e-35	0.356907	0.197	0.141	2.02309e-30	Immature fibers	AC211433.1
5.8937e-35	0.493717	0.188	0.135	2.15715e-30	Immature fibers	MAML3
1.46982e-34	0.376761	0.213	0.156	5.37969e-30	Immature fibers	CFH
1.70163e-34	0.381388	0.193	0.138	6.22815e-30	Immature fibers	SCARB2
2.11205e-34	0.321818	0.125	0.081	7.73031e-30	Immature fibers	COMT
4.21395e-34	0.424878	0.167	0.117	1.54235e-29	Immature fibers	KANK1
5.82347e-34	0.491612	0.214	0.159	2.13145e-29	Immature fibers	APBB2
8.95923e-34	0.335333	0.133	0.088	3.27917e-29	Immature fibers	ZNF431
2.20768e-33	0.445827	0.142	0.096	8.08033e-29	Immature fibers	PALM2-AKAP2
4.45854e-33	0.353538	0.103	0.065	1.63187e-28	Immature fibers	WASF2
7.34888e-33	0.335556	0.102	0.063	2.68976e-28	Immature fibers	SEC14L1
9.53325e-33	0.33333	0.171	0.12	3.48927e-28	Immature fibers	NAA25
1.18339e-32	0.391538	0.137	0.093	4.33132e-28	Immature fibers	PHF14
1.34339e-32	0.406148	0.33	0.269	4.91693e-28	Immature fibers	GTF2I
1.74218e-32	0.371316	0.236	0.178	6.37657e-28	Immature fibers	HSPB8
5.6322e-32	0.368238	0.191	0.139	2.06144e-27	Immature fibers	TFPI
1.64472e-31	0.285965	0.111	0.071	6.01984e-27	Immature fibers	STRADB
4.29821e-31	0.416138	0.254	0.197	1.57319e-26	Immature fibers	LINC01479
6.30686e-31	0.468937	0.132	0.091	2.30837e-26	Immature fibers	AC097662.1
7.4954e-31	0.375701	0.355	0.293	2.74339e-26	Immature fibers	STAG1
7.54177e-31	0.312697	0.135	0.091	2.76036e-26	Immature fibers	CAMSAP2
1.11053e-30	0.321438	0.103	0.066	4.06465e-26	Immature fibers	UGGT2
1.27579e-30	0.471229	0.113	0.074	4.66952e-26	Immature fibers	CARNS1
2.78166e-30	0.325108	0.149	0.103	1.01811e-25	Immature fibers	NSUN6
5.36388e-30	0.379853	0.135	0.092	1.96323e-25	Immature fibers	AUTS2
7.84107e-30	0.290927	0.105	0.067	2.86991e-25	Immature fibers	UHRF1BP1L
1.23997e-29	0.289172	0.111	0.072	4.53841e-25	Immature fibers	KIF5B
1.4238e-29	0.297883	0.119	0.079	5.21125e-25	Immature fibers	DYNC1I2
2.19453e-29	0.313156	0.105	0.068	8.03218e-25	Immature fibers	PABPN1
4.64073e-29	0.400262	0.157	0.111	1.69855e-24	Immature fibers	DIPK1A
8.13833e-29	0.273427	0.117	0.077	2.97871e-24	Immature fibers	ROR1
1.11661e-28	0.385867	0.126	0.086	4.08692e-24	Immature fibers	STARD7
1.39678e-28	0.406838	0.116	0.078	5.11235e-24	Immature fibers	ZNRF2
2.11422e-28	0.308926	0.201	0.15	7.73826e-24	Immature fibers	KPNA3
3.29929e-28	0.360138	0.181	0.133	1.20757e-23	Immature fibers	PRRC2B
5.37134e-28	0.306092	0.148	0.104	1.96596e-23	Immature fibers	PRKDC
5.63309e-28	0.498136	0.175	0.128	2.06177e-23	Immature fibers	RPL41
1.72862e-27	0.403338	0.161	0.116	6.32691e-23	Immature fibers	MDN1
2.70522e-27	0.339966	0.129	0.089	9.90137e-23	Immature fibers	MAPK1
3.97583e-27	0.349719	0.14	0.098	1.45519e-22	Immature fibers	GOLGA8B
5.87379e-27	0.252468	0.192	0.142	2.14987e-22	Immature fibers	TYW1
8.53069e-27	0.294003	0.14	0.098	3.12232e-22	Immature fibers	FAM13B
1.465e-26	0.323295	0.585	0.541	5.36206e-22	Immature fibers	UBE2E2
1.98143e-26	0.28294	0.158	0.113	7.25224e-22	Immature fibers	MPRIP
3.1094e-26	0.272676	0.41	0.35	1.13807e-21	Immature fibers	ARHGEF12
3.13058e-26	0.284773	0.118	0.08	1.14582e-21	Immature fibers	AC074032.1
3.49159e-26	0.343821	0.147	0.105	1.27796e-21	Immature fibers	ATCAY
5.06887e-26	0.56579	0.109	0.075	1.85526e-21	Immature fibers	FREM2
7.81944e-26	0.333297	0.105	0.07	2.86199e-21	Immature fibers	ADAMTS17
7.91668e-26	0.301335	0.11	0.074	2.89758e-21	Immature fibers	DYNC1H1
8.36808e-26	0.463921	0.117	0.081	3.0628e-21	Immature fibers	MYO1E
1.43247e-25	0.292187	0.185	0.138	5.24299e-21	Immature fibers	HERC4
1.45763e-25	0.286557	0.109	0.074	5.33507e-21	Immature fibers	TMEM165
1.77328e-25	0.328378	0.108	0.072	6.49037e-21	Immature fibers	RPS27
3.34617e-25	0.335552	0.295	0.241	1.22473e-20	Immature fibers	BABAM2
5.77721e-25	0.297116	0.281	0.226	2.11452e-20	Immature fibers	ZNF565
7.9221e-25	0.361885	0.198	0.152	2.89957e-20	Immature fibers	RB1
1.06872e-24	0.364749	0.452	0.404	3.91163e-20	Immature fibers	REV3L
1.18843e-24	0.864553	0.156	0.118	4.34978e-20	Immature fibers	AF165147.1
2.1074e-24	0.326934	0.177	0.132	7.71331e-20	Immature fibers	ITGB1
2.37669e-24	0.278178	0.119	0.082	8.69891e-20	Immature fibers	SERPINF1
4.16751e-24	0.299798	0.126	0.088	1.52535e-19	Immature fibers	DARS
4.17651e-24	0.373163	0.236	0.189	1.52864e-19	Immature fibers	OSBPL8
4.47048e-24	0.365691	0.237	0.187	1.63624e-19	Immature fibers	EYA1
7.32238e-24	0.25381	0.205	0.157	2.68006e-19	Immature fibers	SCFD2
7.43836e-24	0.403413	0.358	0.311	2.72251e-19	Immature fibers	SLC16A10
8.52202e-24	0.337702	0.138	0.099	3.11914e-19	Immature fibers	TAF1
1.38449e-23	0.349932	0.102	0.069	5.06737e-19	Immature fibers	AKT3
1.64424e-23	0.381715	0.116	0.081	6.01809e-19	Immature fibers	ADNP
2.18522e-23	0.330345	0.176	0.133	7.99811e-19	Immature fibers	ATXN10
3.22541e-23	0.376154	0.133	0.096	1.18053e-18	Immature fibers	RTTN
3.22818e-23	0.31619	0.185	0.14	1.18155e-18	Immature fibers	ACACA
3.2756e-23	0.317983	0.137	0.098	1.1989e-18	Immature fibers	WRN
3.82373e-23	0.471441	0.133	0.097	1.39952e-18	Immature fibers	RPS6KA5
5.00583e-23	0.32996	0.171	0.128	1.83218e-18	Immature fibers	SMG6
8.36941e-23	0.310958	0.205	0.158	3.06329e-18	Immature fibers	WDFY3
1.08423e-22	0.44291	0.114	0.08	3.96839e-18	Immature fibers	LINC01376
1.09828e-22	0.308025	0.154	0.113	4.0198e-18	Immature fibers	CAPZB
1.68562e-22	0.280221	0.145	0.105	6.16955e-18	Immature fibers	TTLL7
1.86704e-22	0.499235	0.188	0.148	6.83356e-18	Immature fibers	COL4A4
1.92021e-22	0.510761	0.591	0.57	7.02815e-18	Immature fibers	ZFPM2
1.97704e-22	0.327982	0.209	0.163	7.23615e-18	Immature fibers	CAVIN4
2.7538e-22	0.302481	0.135	0.098	1.00792e-17	Immature fibers	PNN
3.53328e-22	0.331341	0.225	0.178	1.29321e-17	Immature fibers	RBPJ
3.87165e-22	0.25925	0.105	0.072	1.41706e-17	Immature fibers	MFGE8
4.7609e-22	0.310479	0.145	0.106	1.74254e-17	Immature fibers	CCDC88A
7.26313e-22	0.290365	0.125	0.089	2.65838e-17	Immature fibers	CORO1C
1.01513e-21	0.323128	0.181	0.138	3.71546e-17	Immature fibers	SPIDR
1.71913e-21	0.319683	0.113	0.079	6.2922e-17	Immature fibers	CCNL2
1.82674e-21	0.260295	0.166	0.124	6.68604e-17	Immature fibers	GNG12-AS1
2.40104e-21	0.31778	0.202	0.157	8.78805e-17	Immature fibers	CELF1
3.32973e-21	0.41439	0.245	0.201	1.21872e-16	Immature fibers	SYNE2
3.9358e-21	0.309961	0.246	0.198	1.44054e-16	Immature fibers	DENND5B
4.71193e-21	0.320053	0.12	0.086	1.72461e-16	Immature fibers	MAP3K4
7.70273e-21	0.251786	0.111	0.078	2.81928e-16	Immature fibers	TSC22D2
9.12904e-21	0.313671	0.11	0.078	3.34132e-16	Immature fibers	DAAM1
1.48375e-20	0.535814	0.202	0.163	5.43069e-16	Immature fibers	ABLIM1
2.05986e-20	0.263752	0.1	0.069	7.5393e-16	Immature fibers	AP001825.1
2.23399e-20	0.347396	0.187	0.146	8.17661e-16	Immature fibers	ARGLU1
2.67355e-20	0.290204	0.125	0.091	9.78545e-16	Immature fibers	UBE2E3
2.78848e-20	0.375995	0.479	0.441	1.02061e-15	Immature fibers	NCOA1
3.73523e-20	0.297076	0.396	0.345	1.36713e-15	Immature fibers	MYO9A
4.96746e-20	0.264093	0.102	0.071	1.81814e-15	Immature fibers	IARS
5.19115e-20	0.330633	0.165	0.126	1.90001e-15	Immature fibers	LMBR1
5.44376e-20	0.447238	0.236	0.193	1.99247e-15	Immature fibers	PDE5A
5.92058e-20	0.29057	0.241	0.195	2.16699e-15	Immature fibers	ZRANB2
8.37101e-20	0.255235	0.103	0.072	3.06387e-15	Immature fibers	LMNA
8.40385e-20	0.290561	0.118	0.085	3.07589e-15	Immature fibers	ATP8B1
1.06393e-19	0.292747	0.133	0.098	3.8941e-15	Immature fibers	TMEM87A
1.51039e-19	0.314349	0.193	0.151	5.52819e-15	Immature fibers	SORT1
2.33098e-19	0.295165	0.23	0.187	8.53163e-15	Immature fibers	NPEPPS
2.75139e-19	0.257699	0.109	0.078	1.00703e-14	Immature fibers	ZNF544
3.63163e-19	0.255899	0.108	0.076	1.32921e-14	Immature fibers	LINC00174
5.56268e-19	0.624051	0.104	0.076	2.036e-14	Immature fibers	COL21A1
7.42328e-19	0.265336	0.151	0.114	2.71699e-14	Immature fibers	RRAS2
8.23569e-19	0.297382	0.154	0.117	3.01435e-14	Immature fibers	SMARCC1
8.75601e-19	0.322231	0.152	0.116	3.20479e-14	Immature fibers	PTEN
1.13038e-18	0.25323	0.124	0.091	4.13732e-14	Immature fibers	NPAS3
1.20439e-18	0.299896	0.217	0.174	4.40818e-14	Immature fibers	IQGAP1
1.31028e-18	0.298448	0.157	0.12	4.79574e-14	Immature fibers	CCAR1
1.79627e-18	0.306677	0.214	0.172	6.57451e-14	Immature fibers	ESYT2
2.01085e-18	0.30325	0.144	0.109	7.35992e-14	Immature fibers	UBE2E1
2.41724e-18	0.303096	0.321	0.273	8.84734e-14	Immature fibers	TRIM13
2.77451e-18	0.271432	0.131	0.098	1.0155e-13	Immature fibers	GLYR1
3.65349e-18	0.301873	0.108	0.078	1.33721e-13	Immature fibers	KDM4B
4.49096e-18	0.267783	0.206	0.164	1.64374e-13	Immature fibers	DENND1A
4.60692e-18	0.330347	0.163	0.127	1.68618e-13	Immature fibers	ZNRF1
4.85099e-18	0.31299	0.261	0.217	1.77551e-13	Immature fibers	TTC28
4.95472e-18	0.264516	0.142	0.107	1.81348e-13	Immature fibers	AZIN1
5.8854e-18	0.289624	0.145	0.11	2.15412e-13	Immature fibers	PCBP1-AS1
6.18864e-18	0.355677	0.281	0.238	2.2651e-13	Immature fibers	SNRNP70
6.28072e-18	0.260091	0.181	0.142	2.29881e-13	Immature fibers	ZMYM2
7.31696e-18	0.264152	0.171	0.133	2.67808e-13	Immature fibers	ATE1
1.04158e-17	0.309706	0.143	0.109	3.81228e-13	Immature fibers	WDR59
1.04623e-17	0.350401	0.218	0.179	3.82929e-13	Immature fibers	HNRNPDL
1.07245e-17	0.313771	0.247	0.203	3.92528e-13	Immature fibers	EHBP1L1
1.40162e-17	0.403347	0.139	0.107	5.13008e-13	Immature fibers	NFKB1
1.49894e-17	0.290106	0.132	0.1	5.48629e-13	Immature fibers	TRAF3IP2-AS1
1.81831e-17	0.28321	0.128	0.095	6.6552e-13	Immature fibers	MIR100HG
2.15199e-17	0.441667	0.168	0.134	7.87649e-13	Immature fibers	NCOA2
2.99822e-17	0.463809	0.11	0.081	1.09738e-12	Immature fibers	BBS9
3.3145e-17	0.260961	0.155	0.119	1.21314e-12	Immature fibers	MYH6
3.8032e-17	0.288228	0.103	0.074	1.39201e-12	Immature fibers	NAP1L1
6.31148e-17	0.276125	0.195	0.155	2.31006e-12	Immature fibers	RASAL2
6.55283e-17	0.294182	0.156	0.121	2.3984e-12	Immature fibers	SMC5
1.68659e-16	0.317989	0.228	0.189	6.17308e-12	Immature fibers	PUM2
1.84842e-16	0.276853	0.168	0.132	6.76538e-12	Immature fibers	FRYL
2.26715e-16	0.345875	0.115	0.087	8.29798e-12	Immature fibers	PRMT7
2.48243e-16	0.25751	0.164	0.129	9.08594e-12	Immature fibers	MDM4
2.56006e-16	0.271816	0.128	0.096	9.37007e-12	Immature fibers	THADA
3.26259e-16	0.279385	0.123	0.092	1.19414e-11	Immature fibers	FSD1L
4.09005e-16	0.253034	0.185	0.147	1.497e-11	Immature fibers	TET2
4.57462e-16	0.280156	0.159	0.124	1.67435e-11	Immature fibers	HSPB1
4.85222e-16	0.278074	0.271	0.23	1.77596e-11	Immature fibers	CBR4
5.01314e-16	0.294601	0.238	0.198	1.83486e-11	Immature fibers	ATP9B
5.22341e-16	0.298572	0.143	0.11	1.91182e-11	Immature fibers	SYTL3
5.39646e-16	0.294893	0.13	0.099	1.97516e-11	Immature fibers	UBR4
7.85861e-16	0.268826	0.177	0.14	2.87633e-11	Immature fibers	SCMH1
1.29925e-15	0.349633	0.319	0.279	4.75538e-11	Immature fibers	DLEU1
1.48228e-15	0.3319	0.155	0.123	5.42529e-11	Immature fibers	CUL3
5.32542e-15	0.25947	0.162	0.128	1.94916e-10	Immature fibers	IGF2R
6.09022e-15	0.252749	0.203	0.164	2.22908e-10	Immature fibers	EEA1
6.71189e-15	0.313993	0.19	0.153	2.45662e-10	Immature fibers	CTBP2
1.0125e-14	0.308138	0.117	0.09	3.70586e-10	Immature fibers	SFPQ
1.01263e-14	0.397129	0.35	0.311	3.70632e-10	Immature fibers	TRIO
1.01712e-14	0.284877	0.188	0.153	3.72276e-10	Immature fibers	HNRNPH1
1.46321e-14	0.25133	0.126	0.096	5.3555e-10	Immature fibers	SPG7
6.28582e-14	0.270748	0.131	0.102	2.30067e-09	Immature fibers	PSMD11
1.37694e-13	0.271806	0.133	0.104	5.03974e-09	Immature fibers	DLGAP4
2.16373e-13	0.29015	0.123	0.096	7.91946e-09	Immature fibers	RRAD
2.18788e-13	0.255945	0.227	0.19	8.00785e-09	Immature fibers	TENT2
3.85588e-13	0.264852	0.152	0.122	1.41129e-08	Immature fibers	ANKS1A
4.6995e-13	0.250995	0.108	0.082	1.72006e-08	Immature fibers	XRCC5
6.01366e-13	0.287244	0.143	0.113	2.20106e-08	Immature fibers	CTNND1
7.92071e-13	0.274218	0.299	0.261	2.89906e-08	Immature fibers	MFSD4B
8.94367e-13	0.271452	0.172	0.141	3.27347e-08	Immature fibers	CHD6
1.51581e-12	0.265728	0.118	0.091	5.54801e-08	Immature fibers	MYL6
4.30497e-12	0.296542	0.119	0.094	1.57566e-07	Immature fibers	ADD1
4.45349e-12	0.278749	0.111	0.086	1.63002e-07	Immature fibers	EXOG
6.46821e-12	0.252396	0.254	0.218	2.36743e-07	Immature fibers	CDC42BPA
8.86117e-12	0.273858	0.204	0.172	3.24328e-07	Immature fibers	COBL
9.10441e-12	0.282411	0.128	0.101	3.33231e-07	Immature fibers	TOP1
1.32247e-11	0.276288	0.154	0.125	4.84037e-07	Immature fibers	MROH7
2.27564e-11	0.252415	0.213	0.181	8.32907e-07	Immature fibers	NKTR
2.71778e-11	0.272528	0.118	0.093	9.94735e-07	Immature fibers	CAV3
3.52403e-11	0.259508	0.147	0.12	1.28983e-06	Immature fibers	PAK1
8.47252e-11	0.265374	0.167	0.14	3.10103e-06	Immature fibers	RSRP1
1.15548e-10	0.357907	0.137	0.113	4.22918e-06	Immature fibers	KY
2.27155e-10	0.342283	0.145	0.12	8.31409e-06	Immature fibers	NCOR2
3.98418e-10	0.429921	0.122	0.099	1.45825e-05	Immature fibers	AL390957.1
6.13219e-10	0.250222	0.102	0.08	2.24444e-05	Immature fibers	RPL10
9.32229e-10	0.279944	0.25	0.222	3.41205e-05	Immature fibers	LUC7L2
2.11532e-09	0.296771	0.146	0.122	7.7423e-05	Immature fibers	KAT2B
3.22587e-09	0.404784	0.573	0.567	0.00011807	Immature fibers	RBMS3
3.68077e-09	0.263156	0.353	0.324	0.00013472	Immature fibers	CACNA1S
5.83894e-09	0.274251	0.534	0.514	0.000213711	Immature fibers	DLEU2
1.58396e-08	0.273879	0.366	0.34	0.000579744	Immature fibers	ZEB1
1.92591e-08	0.2658	0.109	0.089	0.000704903	Immature fibers	WASL
2.11089e-07	0.309033	0.294	0.271	0.00772608	Immature fibers	FHOD3
6.13269e-07	0.316363	0.126	0.107	0.0224462	Immature fibers	NBEA
1.13349e-05	0.311864	0.225	0.206	0.414867	Immature fibers	ADGRA3
0.000892473	0.375609	0.134	0.122	1	Immature fibers	AC046134.2
0.000358233	0.250581	0.175	0.16	1	Immature fibers	LTBP1
0.000345695	0.310787	0.4	0.393	1	Immature fibers	ZFPM2-AS1
0	1.7732	0.129	0.004	0	Indeterminate	HBA1
0	2.65697	0.238	0.008	0	Indeterminate	HBA2
0	1.82178	0.173	0.01	0	Indeterminate	ELOB
0	1.92122	0.181	0.011	0	Indeterminate	RPS4X
0	3.54238	0.391	0.012	0	Indeterminate	HBB
0	1.97153	0.21	0.015	0	Indeterminate	UBA52
0	2.36761	0.262	0.017	0	Indeterminate	COX8A
0	2.17476	0.229	0.017	0	Indeterminate	RPL15
0	2.71093	0.32	0.018	0	Indeterminate	LGALS1
0	2.25175	0.241	0.019	0	Indeterminate	FAU
0	2.08286	0.218	0.019	0	Indeterminate	NDUFB7
0	2.87686	0.378	0.02	0	Indeterminate	EEF2
0	2.91072	0.362	0.02	0	Indeterminate	UBB
0	2.39899	0.28	0.02	0	Indeterminate	RPL35
0	2.09698	0.232	0.021	0	Indeterminate	RPS16
0	2.67783	0.336	0.022	0	Indeterminate	RPL8
0	2.2673	0.261	0.022	0	Indeterminate	RPL29
0	2.38591	0.265	0.023	0	Indeterminate	RPS15
0	2.15575	0.236	0.023	0	Indeterminate	RPL18A
0	2.38022	0.297	0.025	0	Indeterminate	RPL19
0	2.6863	0.304	0.026	0	Indeterminate	UQCR10
0	2.30114	0.27	0.027	0	Indeterminate	RPS18
0	2.99758	0.419	0.028	0	Indeterminate	EEF1G
0	2.92323	0.393	0.028	0	Indeterminate	ALDOA
0	2.38962	0.298	0.028	0	Indeterminate	RPL7A
0	2.37587	0.288	0.028	0	Indeterminate	NDUFB2
0	2.28036	0.278	0.028	0	Indeterminate	NDUFB10
0	2.45902	0.304	0.029	0	Indeterminate	RPS23
0	2.41336	0.296	0.029	0	Indeterminate	COX6B1
0	2.86025	0.397	0.034	0	Indeterminate	FTH1
0	2.73761	0.364	0.035	0	Indeterminate	UBC
0	3.53043	0.559	0.037	0	Indeterminate	PGAM2
0	2.71782	0.373	0.038	0	Indeterminate	RPS2
0	2.69175	0.373	0.038	0	Indeterminate	UQCRB
0	2.53334	0.332	0.04	0	Indeterminate	HSP90AB1
0	3.1466	0.458	0.042	0	Indeterminate	AK1
0	3.00144	0.447	0.042	0	Indeterminate	MT-ATP8
0	2.43347	0.341	0.042	0	Indeterminate	NDUFA13
0	2.79089	0.409	0.044	0	Indeterminate	ATP5F1D
0	2.6932	0.389	0.044	0	Indeterminate	HSP90AA1
0	2.66117	0.375	0.045	0	Indeterminate	COX4I1
0	2.63831	0.373	0.045	0	Indeterminate	RPL13
0	2.39267	0.333	0.045	0	Indeterminate	ATP5MC3
0	2.84065	0.421	0.05	0	Indeterminate	TPI1
0	2.70984	0.395	0.05	0	Indeterminate	CHCHD10
0	2.97262	0.478	0.051	0	Indeterminate	COX5B
0	3.08214	0.499	0.052	0	Indeterminate	NDUFA4
0	2.9125	0.438	0.052	0	Indeterminate	COX7B
0	3.40574	0.582	0.055	0	Indeterminate	MT-ND4L
0	2.79756	0.442	0.059	0	Indeterminate	COX7C
0	2.63536	0.401	0.062	0	Indeterminate	COX6C
0	2.74586	0.445	0.065	0	Indeterminate	RPL37A
0	3.46136	0.622	0.07	0	Indeterminate	RPLP1
0	3.118	0.538	0.07	0	Indeterminate	EIF1
0	3.31338	0.617	0.071	0	Indeterminate	EEF1A2
0	3.78873	0.699	0.078	0	Indeterminate	TPT1
0	2.63193	0.457	0.078	0	Indeterminate	RPL10
0	3.55461	0.703	0.102	0	Indeterminate	MT-ND5
0	3.52601	0.712	0.106	0	Indeterminate	COX7A1
0	3.38654	0.74	0.135	0	Indeterminate	COX6A2
0	4.72395	0.917	0.144	0	Indeterminate	GAPDH
0	5.4835	0.985	0.181	0	Indeterminate	TCAP
0	3.22915	0.744	0.181	0	Indeterminate	CRYAB
0	3.1123	0.714	0.183	0	Indeterminate	SLN
0	3.996	0.899	0.188	0	Indeterminate	MT-ND2
0	5.9785	0.911	0.198	0	Indeterminate	TNNC2
0	4.43097	0.949	0.207	0	Indeterminate	MTRNR2L12
0	3.87367	0.881	0.211	0	Indeterminate	ENO3
0	4.42178	0.79	0.216	0	Indeterminate	TNNI2
0	4.03353	0.945	0.226	0	Indeterminate	MT-ND4
0	4.18028	0.963	0.239	0	Indeterminate	MT-ND1
0	4.03057	0.948	0.243	0	Indeterminate	MT-CYB
0	4.60124	0.975	0.244	0	Indeterminate	DES
0	3.72509	0.79	0.258	0	Indeterminate	TPM1
0	2.54635	0.736	0.259	0	Indeterminate	MYOZ1
0	4.66558	0.874	0.278	0	Indeterminate	MYLPF
0	4.81001	0.988	0.31	0	Indeterminate	MB
0	4.4488	0.993	0.329	0	Indeterminate	MT-CO2
0	4.20233	0.993	0.329	0	Indeterminate	MT-ATP6
0	4.91793	0.993	0.36	0	Indeterminate	CKM
0	4.4222	0.995	0.362	0	Indeterminate	MT-ND3
0	4.38035	0.996	0.409	0	Indeterminate	MT-CO1
0	4.29428	0.995	0.409	0	Indeterminate	TPM2
0	4.30313	0.995	0.442	0	Indeterminate	MT-CO3
0	2.96806	0.961	0.481	0	Indeterminate	MYL1
0	4.44141	1	0.778	0	Indeterminate	ACTA1
3.40232e-307	2.201	0.261	0.029	1.24528e-302	Indeterminate	RPS14
2.96981e-304	2.27669	0.272	0.031	1.08698e-299	Indeterminate	NDUFA1
1.63831e-302	3.2961	0.783	0.32	5.99636e-298	Indeterminate	TNNT3
1.99005e-302	2.1853	0.272	0.031	7.28377e-298	Indeterminate	TOMM7
1.04354e-299	2.03286	0.209	0.019	3.81947e-295	Indeterminate	PRDX2
2.45803e-292	2.17504	0.237	0.025	8.99663e-288	Indeterminate	NDUFS5
1.85892e-291	3.20625	0.317	0.044	6.80382e-287	Indeterminate	MTRNR2L8
4.28518e-291	2.75679	0.832	0.411	1.56842e-286	Indeterminate	XIRP2
2.26073e-290	2.33863	0.29	0.037	8.2745e-286	Indeterminate	RPS8
3.70246e-289	1.90133	0.186	0.015	1.35514e-284	Indeterminate	NDUFB11
3.60156e-287	2.24106	0.292	0.038	1.31821e-282	Indeterminate	RPL30
2.51422e-285	2.04655	0.229	0.024	9.20231e-281	Indeterminate	HSPA8
1.24387e-281	2.42411	0.313	0.044	4.55268e-277	Indeterminate	RPS24
3.69757e-280	1.4262	0.119	0.006	1.35335e-275	Indeterminate	RPL36AL
1.40784e-277	2.75434	0.776	0.346	5.15282e-273	Indeterminate	CA3
2.31753e-275	1.95311	0.197	0.018	8.48241e-271	Indeterminate	SRP14
9.57574e-272	2.19922	0.27	0.034	3.50482e-267	Indeterminate	UQCR11
9.99887e-272	2.31458	0.31	0.045	3.65969e-267	Indeterminate	ATP5PF
1.53751e-270	2.39279	0.383	0.069	5.62744e-266	Indeterminate	ATP5F1B
1.35548e-267	1.9824	0.196	0.018	4.96121e-263	Indeterminate	RPL4
2.79578e-267	1.97673	0.192	0.018	1.02328e-262	Indeterminate	FEM1A
7.06401e-267	1.95035	0.204	0.02	2.5855e-262	Indeterminate	CYCS
1.74642e-265	2.01069	0.208	0.021	6.39207e-261	Indeterminate	RPS3
1.32421e-264	1.99126	0.212	0.022	4.84674e-260	Indeterminate	RPL18
4.59005e-263	1.59492	0.134	0.009	1.68001e-258	Indeterminate	MRPS24
1.56707e-262	2.03139	0.229	0.025	5.73564e-258	Indeterminate	RPL23A
1.86815e-261	2.22744	0.284	0.039	6.83763e-257	Indeterminate	CHCHD2
5.24051e-258	1.79144	0.168	0.014	1.91808e-253	Indeterminate	RPS5
6.34357e-258	1.6452	0.145	0.01	2.32181e-253	Indeterminate	AURKAIP1
1.85884e-255	2.0351	0.209	0.022	6.80354e-251	Indeterminate	RPL26
2.77766e-251	2.23123	0.246	0.031	1.01665e-246	Indeterminate	RPS3A
3.50547e-247	3.97623	0.708	0.316	1.28304e-242	Indeterminate	TNNC1
8.62056e-247	2.576	0.581	0.183	3.15521e-242	Indeterminate	SLC25A4
2.20633e-245	2.09043	0.228	0.027	8.07539e-241	Indeterminate	PEBP1
4.37738e-245	2.36532	0.723	0.312	1.60216e-240	Indeterminate	PYGM
1.38157e-242	2.21318	0.274	0.039	5.05667e-238	Indeterminate	MTLN
4.3359e-242	2.52925	0.393	0.08	1.58698e-237	Indeterminate	MUSTN1
2.36816e-241	2.2056	0.249	0.033	8.6677e-237	Indeterminate	OAZ1
2.1056e-238	1.98498	0.214	0.024	7.70669e-234	Indeterminate	RPL9
4.82838e-236	1.00691	1	0.997	1.76724e-231	Indeterminate	TTN
1.02529e-233	1.95913	0.208	0.023	3.75266e-229	Indeterminate	MDH2
1.61533e-232	2.65169	0.593	0.189	5.91225e-228	Indeterminate	MYBPC2
1.24303e-230	3.16486	0.732	0.293	4.5496e-226	Indeterminate	MYH2
2.1735e-228	1.96359	0.205	0.023	7.95523e-224	Indeterminate	ATP5F1E
1.29639e-227	1.99398	0.237	0.031	4.74491e-223	Indeterminate	RPS27A
8.57303e-227	2.01269	0.201	0.023	3.13781e-222	Indeterminate	YBX1
3.93369e-226	2.40643	0.268	0.04	1.43977e-221	Indeterminate	MT1X
6.52398e-226	1.98834	0.205	0.024	2.38784e-221	Indeterminate	RPS13
1.31579e-225	3.81197	0.759	0.414	4.81593e-221	Indeterminate	MYL2
1.06152e-222	1.39192	0.108	0.007	3.88528e-218	Indeterminate	TSPYL1
9.85743e-221	1.7618	0.173	0.017	3.60792e-216	Indeterminate	RPL28
1.06196e-218	1.84043	0.166	0.016	3.88687e-214	Indeterminate	NDUFA3
8.56906e-218	2.26244	0.328	0.061	3.13636e-213	Indeterminate	SLC25A3
1.14318e-216	2.39944	0.474	0.129	4.18415e-212	Indeterminate	RPL41
2.95391e-215	2.10736	0.256	0.038	1.08116e-210	Indeterminate	S100A1
5.10806e-212	2.11906	0.224	0.029	1.8696e-207	Indeterminate	S100A6
2.60861e-211	1.79277	0.161	0.016	9.54779e-207	Indeterminate	RPL27
6.21127e-211	2.03689	0.232	0.032	2.27339e-206	Indeterminate	ATP5MC1
1.63243e-205	1.34599	0.104	0.007	5.97487e-201	Indeterminate	GADD45GIP1
2.73149e-205	1.87123	0.206	0.026	9.99754e-201	Indeterminate	RPL34
3.42541e-205	1.74758	0.168	0.017	1.25373e-200	Indeterminate	ATP5MF
5.61534e-205	2.34297	0.308	0.056	2.05527e-200	Indeterminate	ACTN3
9.31362e-205	1.47396	0.107	0.007	3.40888e-200	Indeterminate	MTRNR2L1
8.86109e-202	1.79705	0.176	0.019	3.24325e-197	Indeterminate	RPL22
3.20636e-201	1.56807	0.14	0.012	1.17356e-196	Indeterminate	PCBP1
6.32884e-201	1.93825	0.22	0.03	2.31642e-196	Indeterminate	RPLP0
7.39645e-197	1.94107	0.205	0.027	2.70718e-192	Indeterminate	RPS9
2.6421e-195	1.49084	0.112	0.008	9.67037e-191	Indeterminate	EID1
5.31639e-193	2.20358	0.687	0.339	1.94585e-188	Indeterminate	KLHL41
1.12798e-190	1.70405	0.166	0.018	4.1285e-186	Indeterminate	RPS11
1.81853e-190	2.41493	0.313	0.062	6.656e-186	Indeterminate	IL32
2.48508e-187	1.83445	0.189	0.024	9.09565e-183	Indeterminate	RPS19
1.07787e-186	1.66382	0.157	0.017	3.94512e-182	Indeterminate	NDUFA7
6.81579e-186	1.93533	0.2	0.027	2.49465e-181	Indeterminate	NDUFS6
1.35908e-185	1.63407	0.149	0.015	4.97435e-181	Indeterminate	RPL36
1.33526e-184	1.81243	0.2	0.027	4.88718e-180	Indeterminate	RACK1
3.67673e-184	1.73157	0.168	0.019	1.34572e-179	Indeterminate	RPL35A
7.6974e-184	1.54348	0.119	0.01	2.81733e-179	Indeterminate	ENDOG
8.56348e-184	1.8034	0.188	0.024	3.13432e-179	Indeterminate	RPS7
1.47992e-183	2.60572	0.252	0.042	5.41664e-179	Indeterminate	H19
1.39175e-182	1.97559	0.208	0.029	5.09394e-178	Indeterminate	MT-ND6
2.47445e-182	1.89172	0.206	0.029	9.05675e-178	Indeterminate	RPL6
5.63918e-182	1.56134	0.126	0.011	2.064e-177	Indeterminate	POLR2L
4.85062e-180	1.94655	0.222	0.034	1.77538e-175	Indeterminate	RPL11
3.03229e-178	1.55731	0.134	0.013	1.10985e-173	Indeterminate	PRDX1
3.25934e-177	2.06906	0.278	0.052	1.19295e-172	Indeterminate	GAMT
8.60611e-176	2.13685	0.249	0.043	3.14992e-171	Indeterminate	RPS28
8.6045e-174	2.39759	0.39	0.103	3.14933e-169	Indeterminate	IGFBP5
1.13364e-173	2.56612	0.466	0.148	4.14925e-169	Indeterminate	MYL12A
1.65447e-172	2.01244	0.222	0.035	6.05552e-168	Indeterminate	COX5A
1.38624e-167	1.91656	0.202	0.03	5.07379e-163	Indeterminate	RPS12
4.22137e-166	1.8048	0.193	0.027	1.54507e-161	Indeterminate	NDUFAB1
8.2029e-166	1.36652	0.937	0.853	3.00234e-161	Indeterminate	CMYA5
2.55014e-165	1.61774	0.134	0.014	9.33376e-161	Indeterminate	MRPL41
3.96007e-164	1.87535	0.218	0.035	1.44943e-159	Indeterminate	UQCRQ
1.98733e-162	2.10069	0.277	0.056	7.27383e-158	Indeterminate	ATP5F1A
3.39307e-161	1.49902	0.121	0.012	1.2419e-156	Indeterminate	CDV3
2.33509e-159	2.02024	0.244	0.044	8.54665e-155	Indeterminate	HSPB6
2.76489e-159	1.7989	0.18	0.025	1.01198e-154	Indeterminate	NDUFB4
1.19311e-158	1.82968	0.2	0.03	4.36692e-154	Indeterminate	RPL13A
2.14301e-158	1.82066	0.185	0.026	7.84364e-154	Indeterminate	PARK7
8.30385e-158	1.76639	0.176	0.024	3.03929e-153	Indeterminate	ATP5PD
3.97799e-157	1.99271	0.626	0.296	1.45598e-152	Indeterminate	YBX3
9.17702e-157	1.50565	0.13	0.014	3.35888e-152	Indeterminate	PSMB6
5.57552e-156	1.67931	0.166	0.022	2.0407e-151	Indeterminate	RPL38
1.10035e-155	1.43433	0.116	0.011	4.02741e-151	Indeterminate	CCDC28B
1.62744e-155	1.78383	0.196	0.03	5.9566e-151	Indeterminate	RPL14
3.81047e-154	1.69377	0.16	0.02	1.39467e-149	Indeterminate	RPL23
7.88439e-154	1.54249	0.141	0.016	2.88576e-149	Indeterminate	PPP1R1A
3.85478e-152	2.01116	0.261	0.052	1.41089e-147	Indeterminate	RPL32
1.07962e-151	1.78214	0.197	0.031	3.95151e-147	Indeterminate	RPS29
1.08978e-150	1.4566	0.113	0.011	3.98869e-146	Indeterminate	S100A4
9.9001e-150	1.36373	0.121	0.012	3.62353e-145	Indeterminate	UBL5
4.59994e-149	1.7808	0.182	0.027	1.68362e-144	Indeterminate	NDUFB3
8.96e-143	1.50912	0.128	0.014	3.27945e-138	Indeterminate	COX17
1.11904e-142	1.63713	0.152	0.02	4.09581e-138	Indeterminate	RPL39
5.65132e-138	1.54823	0.132	0.016	2.06844e-133	Indeterminate	EEF1B2
4.23689e-137	1.67905	0.16	0.023	1.55074e-132	Indeterminate	PHPT1
5.45118e-137	1.8929	0.236	0.047	1.99519e-132	Indeterminate	RPL24
2.76723e-135	1.30361	0.107	0.011	1.01283e-130	Indeterminate	FIS1
2.85987e-134	2.04085	0.269	0.061	1.04674e-129	Indeterminate	VDAC1
4.01744e-134	2.20292	0.325	0.087	1.47042e-129	Indeterminate	CALM1
1.00763e-133	1.63166	0.16	0.023	3.68804e-129	Indeterminate	RPS6
1.47918e-133	1.93189	0.232	0.046	5.41396e-129	Indeterminate	ATP5ME
2.8347e-132	1.91212	0.233	0.047	1.03753e-127	Indeterminate	RPL21
3.01678e-130	1.44023	0.124	0.015	1.10417e-125	Indeterminate	MICOS13
7.24356e-128	1.92981	0.234	0.049	2.65121e-123	Indeterminate	LDHA
2.4954e-127	2.10894	0.385	0.124	9.13341e-123	Indeterminate	HSPB1
6.84954e-127	1.73965	0.193	0.034	2.507e-122	Indeterminate	PSMA7
3.38092e-126	1.62004	0.172	0.028	1.23745e-121	Indeterminate	RPL10A
1.81717e-125	1.40142	0.129	0.016	6.65103e-121	Indeterminate	BTF3
3.88787e-123	1.46882	0.132	0.017	1.423e-118	Indeterminate	MICOS10
5.18652e-121	1.76958	0.194	0.036	1.89832e-116	Indeterminate	RPS15A
1.24834e-118	2.8384	0.529	0.225	4.56906e-114	Indeterminate	MYH1
1.60222e-117	1.75955	0.188	0.035	5.86427e-113	Indeterminate	H3F3A
5.24414e-117	2.11523	0.485	0.211	1.91941e-112	Indeterminate	FLNC
8.2091e-117	1.52833	0.142	0.021	3.00461e-112	Indeterminate	RPS21
9.36997e-117	1.44856	0.13	0.018	3.4295e-112	Indeterminate	GHITM
1.50668e-112	2.10735	0.344	0.112	5.51461e-108	Indeterminate	SYNM
2.14816e-111	1.61249	0.14	0.021	7.86247e-107	Indeterminate	PINK1
3.34647e-111	1.75775	0.173	0.031	1.22484e-106	Indeterminate	ATP5PO
7.14331e-111	1.82998	0.212	0.045	2.61452e-106	Indeterminate	EIF3K
4.32369e-109	1.36679	0.104	0.012	1.58251e-104	Indeterminate	SAP18
3.46929e-108	1.98244	0.453	0.195	1.2698e-103	Indeterminate	BIN1
8.58181e-108	1.9537	0.606	0.372	3.14103e-103	Indeterminate	ZNF106
1.65346e-106	1.37734	0.12	0.016	6.05184e-102	Indeterminate	GABARAP
3.34635e-106	1.55931	0.148	0.024	1.2248e-101	Indeterminate	NDUFC2
1.08269e-105	1.31421	0.1	0.012	3.96277e-101	Indeterminate	GPX4
2.47636e-105	1.52211	0.133	0.02	9.06372e-101	Indeterminate	SOD1
9.26753e-105	1.7369	0.218	0.05	3.39201e-100	Indeterminate	ATP5MPL
1.33931e-104	1.34173	0.103	0.012	4.90203e-100	Indeterminate	NORAD
3.86875e-104	1.45782	0.152	0.026	1.416e-99	Indeterminate	FTL
6.41482e-104	1.70537	0.201	0.043	2.34789e-99	Indeterminate	SERF2
1.10815e-103	1.43597	0.115	0.015	4.05593e-99	Indeterminate	RPS20
3.61505e-103	1.44975	0.117	0.016	1.32315e-98	Indeterminate	NDUFA6
3.9841e-99	1.56681	0.138	0.023	1.45822e-94	Indeterminate	RPSA
4.3864e-98	1.40954	0.132	0.021	1.60547e-93	Indeterminate	RPL36A
5.04162e-98	1.3832	0.111	0.015	1.84528e-93	Indeterminate	NGRN
2.94978e-97	1.47433	0.145	0.025	1.07965e-92	Indeterminate	RPL27A
5.18038e-97	1.52522	0.598	0.313	1.89607e-92	Indeterminate	ATP2A1
1.5302e-96	2.58501	0.644	0.474	5.60068e-92	Indeterminate	TNNI1
2.25447e-96	1.97184	0.35	0.127	8.25158e-92	Indeterminate	HSPB7
5.35653e-94	3.28497	0.666	0.515	1.96055e-89	Indeterminate	MYH7
5.3835e-94	1.699	0.206	0.049	1.97042e-89	Indeterminate	UQCRC1
7.35492e-93	1.52673	0.133	0.022	2.69198e-88	Indeterminate	EEF1A1
2.01988e-92	1.60874	0.185	0.04	7.39296e-88	Indeterminate	RPL5
4.27418e-91	1.99487	0.324	0.114	1.56439e-86	Indeterminate	SYNPO
1.54418e-89	1.8264	0.36	0.138	5.65186e-85	Indeterminate	PKM
1.37204e-88	1.37073	0.732	0.596	5.02179e-84	Indeterminate	FHL1
1.57355e-88	1.46339	0.146	0.027	5.75937e-84	Indeterminate	EEF1D
4.16232e-88	1.22542	0.1	0.014	1.52345e-83	Indeterminate	ECHS1
1.74755e-87	1.55895	0.15	0.029	6.39619e-83	Indeterminate	HINT1
4.17237e-85	1.42089	0.134	0.024	1.52713e-80	Indeterminate	SHISA4
7.70851e-85	1.49078	0.141	0.026	2.82139e-80	Indeterminate	ETFB
3.23244e-84	1.72315	0.217	0.058	1.18311e-79	Indeterminate	ECH1
1.01564e-83	1.78338	0.217	0.058	3.71734e-79	Indeterminate	RPS25
2.90033e-83	2.63905	0.691	0.582	1.06155e-78	Indeterminate	TNNT1
3.47248e-83	1.74394	0.503	0.273	1.27096e-78	Indeterminate	CSRP3
9.58396e-83	1.66905	0.21	0.055	3.50782e-78	Indeterminate	UQCRFS1
2.26696e-82	1.4244	0.134	0.025	8.29729e-78	Indeterminate	RPS26
3.68924e-82	1.86493	0.352	0.141	1.3503e-77	Indeterminate	GNAS
1.55714e-79	1.44436	0.156	0.033	5.6993e-75	Indeterminate	RPL7
1.49529e-78	1.53682	0.157	0.034	5.4729e-74	Indeterminate	CYC1
1.40018e-77	1.14312	0.767	0.633	5.1248e-73	Indeterminate	NRAP
1.01136e-75	1.79175	0.232	0.07	3.70168e-71	Indeterminate	CNBP
5.56187e-75	1.63649	0.192	0.05	2.0357e-70	Indeterminate	KIF1C
2.16903e-73	1.30722	0.124	0.023	7.93885e-69	Indeterminate	EDF1
1.17255e-72	1.66459	0.188	0.049	4.29163e-68	Indeterminate	PRDX6
2.038e-69	1.75744	0.204	0.059	7.45927e-65	Indeterminate	RAD23A
5.90183e-69	1.70859	0.32	0.131	2.16013e-64	Indeterminate	NDRG2
9.59785e-69	1.49555	0.142	0.032	3.51291e-64	Indeterminate	SBDS
2.60447e-68	1.48323	0.16	0.039	9.53264e-64	Indeterminate	RPL37
1.85412e-67	1.72683	0.415	0.217	6.78627e-63	Indeterminate	CSDE1
1.02191e-64	1.43811	0.134	0.03	3.74028e-60	Indeterminate	TUBA4A
2.27804e-64	1.62584	0.234	0.079	8.33785e-60	Indeterminate	ADSSL1
4.31778e-64	1.62918	0.192	0.056	1.58035e-59	Indeterminate	NDUFV2
1.77862e-63	1.39426	0.116	0.023	6.50992e-59	Indeterminate	RBM38
1.46142e-62	1.73531	0.337	0.153	5.34894e-58	Indeterminate	NFE2L1
2.08243e-61	1.61431	0.197	0.06	7.6219e-57	Indeterminate	SKP1
1.22122e-60	1.64754	0.246	0.089	4.46977e-56	Indeterminate	ATP5IF1
2.6364e-58	1.35429	0.141	0.035	9.6495e-54	Indeterminate	EIF4G1
5.36945e-58	1.26068	0.101	0.019	1.96527e-53	Indeterminate	NDUFA11
9.28386e-58	1.64857	0.217	0.074	3.39798e-53	Indeterminate	RPS27
1.40434e-57	1.42282	0.154	0.041	5.14001e-53	Indeterminate	NDUFS7
6.00645e-57	1.19336	0.1	0.019	2.19842e-52	Indeterminate	PRDX3
6.45922e-56	1.30051	0.162	0.045	2.36414e-51	Indeterminate	CD63
1.54583e-55	1.71554	0.229	0.083	5.65788e-51	Indeterminate	ATP5MC2
1.07588e-54	1.44123	0.142	0.037	3.93783e-50	Indeterminate	NDUFB1
1.2674e-54	1.68442	0.241	0.091	4.63879e-50	Indeterminate	SOD2
1.19814e-52	1.41867	0.145	0.039	4.38532e-48	Indeterminate	EIF4B
6.79463e-52	1.56072	0.326	0.158	2.4869e-47	Indeterminate	FHL3
1.49307e-51	1.65755	0.202	0.07	5.46479e-47	Indeterminate	NDUFB9
1.79565e-51	1.49473	0.182	0.059	6.57226e-47	Indeterminate	ATP5MG
5.342e-51	1.20152	0.108	0.024	1.95523e-46	Indeterminate	ALKBH5
3.03546e-50	1.58774	0.257	0.107	1.11101e-45	Indeterminate	CFL2
6.83022e-50	1.27821	0.121	0.03	2.49993e-45	Indeterminate	PDHA1
8.0157e-50	1.20559	0.115	0.027	2.93383e-45	Indeterminate	FITM1
5.67629e-49	1.36061	0.117	0.029	2.07758e-44	Indeterminate	PSMD8
1.03434e-48	1.30723	0.144	0.04	3.78578e-44	Indeterminate	NDUFC1
9.53698e-48	1.54557	0.233	0.093	3.49063e-43	Indeterminate	PPP1CB
1.37521e-47	1.54157	0.177	0.059	5.03342e-43	Indeterminate	MKNK2
1.53188e-47	1.49126	0.336	0.173	5.60682e-43	Indeterminate	IDH2
2.54048e-47	1.30622	0.111	0.027	9.29841e-43	Indeterminate	CCDC69
4.12171e-47	1.25304	0.116	0.029	1.50859e-42	Indeterminate	NDUFS8
4.98782e-47	1.34042	0.145	0.042	1.82559e-42	Indeterminate	GPD1
6.96375e-45	1.11839	0.111	0.027	2.5488e-40	Indeterminate	RPL17
2.88286e-44	1.32162	0.128	0.035	1.05515e-39	Indeterminate	ST13
1.55795e-43	1.94806	0.541	0.471	5.70226e-39	Indeterminate	TPM3
2.97891e-43	1.26294	0.107	0.026	1.09031e-38	Indeterminate	POMP
1.55685e-42	1.44204	0.145	0.045	5.69823e-38	Indeterminate	JSRP1
5.03492e-42	1.11107	0.104	0.026	1.84283e-37	Indeterminate	ARL6IP4
6.83826e-41	1.40393	0.181	0.066	2.50287e-36	Indeterminate	G0S2
5.52325e-40	1.11536	0.103	0.026	2.02156e-35	Indeterminate	FUNDC2
1.30428e-39	1.18864	0.112	0.03	4.77378e-35	Indeterminate	VDAC2
1.74283e-39	1.46977	0.174	0.064	6.37893e-35	Indeterminate	ATP5F1C
5.05256e-39	1.44642	0.226	0.099	1.84929e-34	Indeterminate	SELENOW
7.17007e-39	1.14009	0.105	0.028	2.62432e-34	Indeterminate	RPL12
2.44299e-38	1.45649	0.22	0.095	8.94158e-34	Indeterminate	PLEC
4.84142e-38	1.33028	0.184	0.071	1.77201e-33	Indeterminate	FXYD1
7.63908e-38	1.32009	0.134	0.043	2.79598e-33	Indeterminate	GOT2
1.36054e-37	1.29384	0.382	0.24	4.9797e-33	Indeterminate	CASQ1
2.93401e-36	1.19261	0.115	0.034	1.07388e-31	Indeterminate	DUSP26
3.3447e-36	1.29058	0.14	0.046	1.22419e-31	Indeterminate	UQCRH
5.07061e-35	1.33401	0.129	0.042	1.85589e-30	Indeterminate	PHYH
9.79818e-35	1.07685	0.103	0.028	3.58623e-30	Indeterminate	RPLP2
1.58256e-34	1.17985	0.113	0.034	5.79234e-30	Indeterminate	RAC1
1.80202e-34	1.41378	0.261	0.133	6.59558e-30	Indeterminate	APOBEC2
2.00707e-34	1.32597	0.145	0.051	7.34608e-30	Indeterminate	PACSIN3
3.3469e-34	1.27281	0.133	0.044	1.225e-29	Indeterminate	NDUFS2
3.85382e-34	1.23449	0.164	0.062	1.41054e-29	Indeterminate	CST3
6.91236e-34	1.11848	0.469	0.344	2.52999e-29	Indeterminate	SYNPO2
6.93567e-34	1.74665	0.246	0.123	2.53852e-29	Indeterminate	STRIT1
6.89699e-33	1.24764	0.14	0.049	2.52437e-28	Indeterminate	PGK1
2.93866e-30	1.67176	0.22	0.107	1.07558e-25	Indeterminate	MYL6B
3.3536e-30	0.744985	0.691	0.67	1.22745e-25	Indeterminate	ACTN2
2.50907e-29	1.39386	0.2	0.092	9.18346e-25	Indeterminate	ANKRD2
1.41954e-28	1.3017	0.2	0.094	5.19567e-24	Indeterminate	SMTNL1
2.00484e-27	1.1732	0.137	0.053	7.33792e-23	Indeterminate	ATP5MD
1.02141e-26	1.0385	0.1	0.032	3.73846e-22	Indeterminate	SPAG7
1.95081e-26	1.10713	0.107	0.036	7.14017e-22	Indeterminate	TLE5
3.39058e-26	1.25945	0.145	0.059	1.24099e-21	Indeterminate	GYG1
4.35167e-26	1.27005	0.316	0.202	1.59276e-21	Indeterminate	SMPX
8.99378e-26	0.985225	0.104	0.035	3.29181e-21	Indeterminate	HSPB3
1.43913e-25	1.3563	0.164	0.072	5.26737e-21	Indeterminate	FKBP3
2.43385e-25	1.27464	0.145	0.06	8.90815e-21	Indeterminate	SYNPO2L
3.26042e-25	1.39882	0.209	0.108	1.19335e-20	Indeterminate	SH3BGR
3.20619e-24	1.15866	0.109	0.039	1.1735e-19	Indeterminate	SCN1B
3.3063e-24	1.12453	0.101	0.035	1.21014e-19	Indeterminate	HJV
3.60171e-23	1.25836	0.302	0.195	1.31826e-18	Indeterminate	PGM1
7.28492e-22	1.26396	0.248	0.147	2.66635e-17	Indeterminate	MGST3
3.72846e-21	1.21855	0.18	0.091	1.36465e-16	Indeterminate	YWHAE
1.02394e-20	1.14585	0.111	0.044	3.74771e-16	Indeterminate	CMBL
1.19206e-20	1.06443	0.116	0.047	4.36307e-16	Indeterminate	RBX1
1.80906e-20	1.267	0.324	0.232	6.62133e-16	Indeterminate	LMOD3
1.09111e-19	1.08075	0.133	0.06	3.99357e-15	Indeterminate	FABP3
8.81651e-19	1.19472	0.152	0.074	3.22693e-14	Indeterminate	EIF5
9.22748e-19	1.02548	0.1	0.039	3.37735e-14	Indeterminate	PSMD7
4.30227e-18	1.19817	0.115	0.05	1.57467e-13	Indeterminate	ARPC2
1.9202e-17	1.03023	0.109	0.047	7.02814e-13	Indeterminate	CCNI
1.20412e-16	0.979103	0.109	0.048	4.40719e-12	Indeterminate	MORF4L1
4.48952e-16	1.09531	0.144	0.073	1.64321e-11	Indeterminate	HRC
5.26399e-16	1.03753	0.109	0.049	1.92667e-11	Indeterminate	C4orf54
7.30254e-16	1.15225	0.158	0.086	2.6728e-11	Indeterminate	EIF4A2
2.69245e-15	1.27817	0.395	0.348	9.85462e-11	Indeterminate	MYL3
8.72147e-15	1.07474	0.146	0.077	3.19214e-10	Indeterminate	PPDPFL
1.35236e-14	0.988162	0.149	0.08	4.94976e-10	Indeterminate	FBP2
1.38798e-14	0.895031	0.119	0.057	5.08013e-10	Indeterminate	B2M
2.12874e-14	1.10192	0.206	0.13	7.79142e-10	Indeterminate	NFIX
2.53851e-13	1.12227	0.104	0.05	9.29119e-09	Indeterminate	PLIN4
4.12332e-13	1.11985	0.157	0.091	1.50918e-08	Indeterminate	MRPL33
3.69466e-12	1.11608	0.214	0.146	1.35228e-07	Indeterminate	SQSTM1
4.36218e-12	1.05068	0.145	0.083	1.5966e-07	Indeterminate	EIF3J
4.61602e-11	1.06757	0.148	0.088	1.68951e-06	Indeterminate	MDH1
7.48357e-11	0.975333	0.308	0.256	2.73906e-06	Indeterminate	COQ8A
1.07395e-10	1.06333	0.16	0.099	3.93076e-06	Indeterminate	EIF5B
1.20844e-10	0.995723	0.149	0.09	4.42301e-06	Indeterminate	NACA
1.88869e-10	1.04635	0.186	0.125	6.91278e-06	Indeterminate	SERBP1
2.53229e-10	0.978059	0.35	0.314	9.26845e-06	Indeterminate	FXR1
7.55424e-10	0.952058	0.224	0.164	2.76493e-05	Indeterminate	OPTN
1.42629e-09	0.893356	0.129	0.077	5.22038e-05	Indeterminate	YWHAG
1.52401e-09	0.940615	0.105	0.058	5.57803e-05	Indeterminate	PTP4A2
2.52288e-09	0.940397	0.136	0.083	9.23398e-05	Indeterminate	SLIRP
2.68082e-09	0.906009	0.109	0.061	9.81206e-05	Indeterminate	NDUFA5
3.73572e-09	0.886148	0.121	0.071	0.000136731	Indeterminate	CD59
6.2834e-09	0.891548	0.105	0.059	0.000229979	Indeterminate	MAP7D1
2.07353e-08	0.917075	0.142	0.092	0.000758934	Indeterminate	NDUFB8
4.43643e-08	0.961367	0.148	0.098	0.00162378	Indeterminate	NUCKS1
9.42319e-08	0.98741	0.146	0.098	0.00344898	Indeterminate	SDHA
9.81441e-08	0.830666	0.126	0.08	0.00359217	Indeterminate	HDLBP
2.96042e-07	0.882461	0.119	0.075	0.0108354	Indeterminate	KIF5B
7.71358e-07	0.757656	0.104	0.064	0.0282325	Indeterminate	ANKRD9
1.21923e-06	0.838074	0.112	0.071	0.0446251	Indeterminate	NDUFV1
2.10665e-06	0.783314	0.107	0.068	0.0771055	Indeterminate	SDHB
2.21968e-06	0.813739	0.126	0.085	0.0812426	Indeterminate	CASTOR2
2.34039e-06	0.815455	0.252	0.214	0.0856605	Indeterminate	ACADVL
4.28367e-06	0.849028	0.113	0.075	0.156787	Indeterminate	EIF4G2
4.75285e-06	0.82256	0.324	0.308	0.173959	Indeterminate	RTN4
5.77878e-06	0.886773	0.141	0.101	0.211509	Indeterminate	KPNA4
5.85397e-06	0.780802	0.111	0.072	0.214261	Indeterminate	AHNAK
5.96599e-06	0.889641	0.181	0.14	0.218361	Indeterminate	MYLK2
6.16293e-06	0.853932	0.204	0.162	0.225569	Indeterminate	PPP1R27
2.21798e-05	0.790278	0.137	0.1	0.811801	Indeterminate	ACO2
0.00043925	0.785781	0.109	0.08	1	Indeterminate	EIF3A
7.66078e-05	0.698252	0.134	0.098	1	Indeterminate	RRAD
0.000135206	0.821583	0.146	0.113	1	Indeterminate	PLN
0.00436565	0.758853	0.142	0.12	1	Indeterminate	UQCRC2
0.000618079	0.830257	0.152	0.123	1	Indeterminate	ACAT1
0.00413169	0.760673	0.18	0.162	1	Indeterminate	NDUFS1
0.00760151	0.264682	0.148	0.207	1	Indeterminate	EHBP1L1
0.00406451	0.733801	0.229	0.218	1	Indeterminate	PKIA
0.00133118	0.755515	0.237	0.22	1	Indeterminate	PFKM
0.00174984	0.697991	0.24	0.225	1	Indeterminate	RPL3L
0.000290834	0.714085	0.304	0.298	1	Indeterminate	LMOD2
0.00336334	0.283	0.631	0.721	1	Indeterminate	LDB3
0	1.41306	0.175	0.007	0	Type I	PPP1R1C
0	1.11683	0.139	0.012	0	Type I	RERG
0	0.906376	0.109	0.014	0	Type I	CCR3
0	0.766113	0.108	0.014	0	Type I	AQP7
0	1.31219	0.194	0.015	0	Type I	MYLK3
0	1.1861	0.156	0.016	0	Type I	LINC02328
0	1.22547	0.153	0.019	0	Type I	LPL
0	1.00622	0.148	0.019	0	Type I	LINC01405
0	2.09609	0.337	0.021	0	Type I	TECRL
0	0.73809	0.118	0.022	0	Type I	ADAMTSL4
0	1.20724	0.169	0.023	0	Type I	AC099066.1
0	1.29295	0.193	0.027	0	Type I	AC099066.2
0	0.719072	0.115	0.027	0	Type I	SLC35F1
0	0.642022	0.11	0.027	0	Type I	AC008957.2
0	0.736299	0.102	0.027	0	Type I	DOCK10
0	0.98363	0.13	0.03	0	Type I	UNC5D
0	0.600488	0.11	0.031	0	Type I	ACSS1
0	0.573617	0.105	0.031	0	Type I	GPT2
0	0.507664	0.112	0.031	0	Type I	COL21A1
0	0.961672	0.187	0.034	0	Type I	STRIT1
0	1.05514	0.183	0.036	0	Type I	MYH6
0	2.32079	0.464	0.037	0	Type I	MYH7B
0	0.887632	0.142	0.038	0	Type I	LRRC7
0	0.685447	0.123	0.04	0	Type I	GLIS3
0	0.800581	0.157	0.04	0	Type I	MYL6B
0	1.98265	0.344	0.043	0	Type I	BICC1
0	1.65305	0.28	0.045	0	Type I	AC020687.1
0	0.568042	0.134	0.05	0	Type I	DNAJA4
0	0.81865	0.17	0.055	0	Type I	SLC4A7
0	2.23819	0.555	0.057	0	Type I	MYL3
0	0.617993	0.156	0.058	0	Type I	COL5A2
0	1.4081	0.287	0.059	0	Type I	MYOZ2
0	0.659542	0.15	0.059	0	Type I	HIVEP3
0	0.828929	0.183	0.062	0	Type I	JAZF1
0	0.556453	0.15	0.062	0	Type I	PLN
0	1.06019	0.226	0.067	0	Type I	AC019068.1
0	0.703014	0.173	0.07	0	Type I	AC100803.4
0	0.653391	0.189	0.078	0	Type I	TMEM245
0	0.821255	0.197	0.08	0	Type I	AP002518.2
0	1.00974	0.214	0.081	0	Type I	AC090403.1
0	0.601293	0.182	0.083	0	Type I	CYP2J2
0	0.690929	0.192	0.087	0	Type I	AC073167.1
0	0.815436	0.221	0.09	0	Type I	ABLIM1
0	0.879559	0.238	0.091	0	Type I	MAP2K6
0	1.02802	0.278	0.096	0	Type I	COLQ
0	0.977214	0.306	0.098	0	Type I	SLC1A3
0	0.660014	0.214	0.098	0	Type I	ICE2
0	0.969987	0.285	0.103	0	Type I	PPP3CB-AS1
0	0.651025	0.229	0.109	0	Type I	ATP1B4
0	0.656884	0.219	0.109	0	Type I	RIPOR2
0	1.09147	0.299	0.112	0	Type I	ASB18
0	0.641595	0.243	0.117	0	Type I	CYB5R1
0	0.965055	0.301	0.124	0	Type I	WIPF3
0	1.81882	0.794	0.124	0	Type I	MYH7
0	0.797178	0.457	0.125	0	Type I	TNNC1
0	0.896387	0.286	0.13	0	Type I	FEZ2
0	1.96385	0.712	0.133	0	Type I	TPM3
0	1.54076	0.479	0.135	0	Type I	ZNF385B
0	0.761515	0.301	0.137	0	Type I	PRRX1
0	0.789057	0.292	0.14	0	Type I	CREB5
0	1.02217	0.337	0.144	0	Type I	AL139383.1
0	1.74848	0.707	0.148	0	Type I	TNNI1
0	1.16539	0.384	0.156	0	Type I	CRIM1
0	0.597579	0.271	0.156	0	Type I	ENAH
0	1.06535	0.6	0.159	0	Type I	MYL2
0	0.626691	0.296	0.159	0	Type I	RYR3
0	0.794324	0.321	0.162	0	Type I	JAK2
0	0.455966	0.319	0.168	0	Type I	CASQ2
0	0.584361	0.311	0.178	0	Type I	SLC38A2
0	0.628126	0.307	0.183	0	Type I	DOCK4
0	0.774764	0.329	0.184	0	Type I	CEP128
0	0.509829	0.322	0.189	0	Type I	PDE4B
0	0.645102	0.339	0.192	0	Type I	G3BP2
0	0.750294	0.368	0.194	0	Type I	KLF12
0	1.97828	0.856	0.196	0	Type I	TNNT1
0	0.602604	0.355	0.199	0	Type I	ABCC5
0	1.58578	0.552	0.201	0	Type I	ESRRG
0	0.74448	0.406	0.201	0	Type I	RCAN2
0	2.63414	0.861	0.209	0	Type I	ATP2A2
0	0.852562	0.449	0.21	0	Type I	CA3
0	0.849864	0.449	0.211	0	Type I	FLRT2
0	3.09609	0.849	0.212	0	Type I	XPO4
0	0.51371	0.348	0.216	0	Type I	LMCD1
0	0.504017	0.352	0.222	0	Type I	LMOD2
0	0.89211	0.381	0.224	0	Type I	FMNL2
0	0.674153	0.392	0.225	0	Type I	KCNMA1
0	0.820689	0.428	0.235	0	Type I	KALRN
0	0.921671	0.464	0.238	0	Type I	USP54
0	0.525603	0.369	0.239	0	Type I	TSC22D1
0	0.561282	0.39	0.247	0	Type I	LRRC39
0	0.707335	0.421	0.248	0	Type I	HS3ST5
0	0.543592	0.384	0.25	0	Type I	SLCO5A1
0	0.547286	0.394	0.253	0	Type I	SLC25A36
0	0.652233	0.424	0.255	0	Type I	USP13
0	0.966387	0.518	0.271	0	Type I	NT5C2
0	1.21215	0.552	0.275	0	Type I	TTTY14
0	0.569575	0.451	0.275	0	Type I	LRRC2
0	0.697433	0.47	0.282	0	Type I	MAGI1
0	0.650241	0.449	0.285	0	Type I	FAM214A
0	0.580319	0.439	0.288	0	Type I	TMEM131L
0	0.67012	0.519	0.305	0	Type I	MYOM3
0	0.634419	0.486	0.312	0	Type I	ALPK3
0	0.712564	0.516	0.321	0	Type I	EXOC6
0	0.766768	0.51	0.324	0	Type I	HERC1
0	0.674616	0.507	0.33	0	Type I	VPS8
0	0.593329	0.482	0.333	0	Type I	PTPRQ
0	0.662854	0.486	0.346	0	Type I	MYOM2
0	0.794789	0.56	0.352	0	Type I	MCU
0	0.583248	0.529	0.355	0	Type I	THRB
0	0.507559	0.505	0.357	0	Type I	SLC20A2
0	0.417838	0.516	0.375	0	Type I	C1orf21
0	0.813992	0.574	0.377	0	Type I	AC106791.1
0	0.493814	0.532	0.378	0	Type I	TPD52L1
0	0.478477	0.534	0.381	0	Type I	PAM
0	0.543051	0.55	0.386	0	Type I	MICU1
0	0.835935	0.62	0.391	0	Type I	LINC01091
0	0.612602	0.583	0.405	0	Type I	FOXN3
0	0.577136	0.58	0.41	0	Type I	AC010680.5
0	0.595414	0.64	0.436	0	Type I	SORBS1
0	1.16933	0.767	0.458	0	Type I	CD36
0	0.469003	0.619	0.46	0	Type I	ARPP21
0	0.505074	0.712	0.526	0	Type I	NRAP
0	0.433379	0.685	0.542	0	Type I	AKAP6
0	0.672996	0.756	0.55	0	Type I	ACTN2
0	0.737382	0.766	0.564	0	Type I	QKI
0	0.607173	0.785	0.61	0	Type I	MYOT
0	0.568294	0.845	0.706	0	Type I	RIF1
0	0.671551	0.886	0.713	0	Type I	MYOM1
0	0.414372	0.943	0.868	0	Type I	TTN-AS1
0	0.578982	0.99	0.955	0	Type I	MYBPC1
0	0.350137	0.997	0.989	0	Type I	NEB
7.41863e-306	0.588235	0.143	0.058	2.71529e-301	Type I	RETSAT
2.45911e-305	0.616843	0.188	0.091	9.0006e-301	Type I	GAREM1
4.48648e-301	0.440098	0.348	0.22	1.6421e-296	Type I	CFLAR
1.2279e-299	0.540796	0.268	0.155	4.49423e-295	Type I	HADHB
1.50695e-298	0.482649	0.327	0.203	5.51558e-294	Type I	CSRP3
2.92173e-296	0.520248	0.296	0.179	1.06938e-291	Type I	PSME4
9.83441e-296	0.579502	0.17	0.078	3.59949e-291	Type I	EGLN1
1.60855e-289	0.50319	0.321	0.202	5.88746e-285	Type I	VPS13C
3.46226e-288	0.391413	0.556	0.419	1.26722e-283	Type I	LRRFIP1
1.33543e-287	0.349286	0.681	0.55	4.88782e-283	Type I	FILIP1
4.11846e-287	0.486614	0.408	0.281	1.5074e-282	Type I	ARHGEF12
1.70966e-286	0.30715	0.776	0.664	6.25754e-282	Type I	KIAA1217
6.58655e-282	0.556814	0.195	0.1	2.41074e-277	Type I	SPATS2
4.37767e-281	0.53359	0.312	0.197	1.60227e-276	Type I	HDAC2-AS2
6.14955e-274	0.528253	0.34	0.223	2.2508e-269	Type I	UBAC2
3.77125e-271	0.507416	0.27	0.16	1.38031e-266	Type I	FBXO40
1.49034e-266	0.557563	0.258	0.154	5.45481e-262	Type I	GPAT3
1.94266e-266	0.504571	0.137	0.058	7.11034e-262	Type I	CFLAR-AS1
1.9849e-263	0.464238	0.355	0.239	7.26492e-259	Type I	ERBIN
9.01919e-253	0.518676	0.188	0.099	3.30111e-248	Type I	SETX
1.87744e-252	0.270213	0.828	0.745	6.87163e-248	Type I	PDE4DIP
4.74996e-252	0.434497	0.271	0.163	1.73853e-247	Type I	TMEM108
1.23356e-248	0.56145	0.231	0.134	4.51494e-244	Type I	BCO2
9.20339e-248	0.534378	0.128	0.054	3.36853e-243	Type I	FHL2
1.19654e-247	0.309158	0.552	0.421	4.37944e-243	Type I	AC108734.4
1.80895e-244	0.457621	0.215	0.12	6.62092e-240	Type I	ESYT2
3.79354e-244	0.449524	0.315	0.205	1.38847e-239	Type I	TBC1D8
1.04982e-243	0.542738	0.163	0.081	3.84246e-239	Type I	ESRRB
1.30939e-238	0.445403	0.238	0.138	4.79249e-234	Type I	NEK10
4.09869e-238	0.529077	0.105	0.04	1.50016e-233	Type I	AC113167.1
1.5431e-234	0.524076	0.152	0.074	5.64788e-230	Type I	ADAMTS9
2.03808e-225	0.444485	0.338	0.23	7.45958e-221	Type I	SEMA3C
7.8271e-224	0.508764	0.101	0.039	2.8648e-219	Type I	BDNF-AS
5.78601e-223	0.484659	0.251	0.156	2.11774e-218	Type I	BTD
1.79937e-221	0.469841	0.198	0.111	6.58586e-217	Type I	PPM1B
4.39879e-221	0.446041	0.296	0.194	1.61e-216	Type I	AC119674.1
2.51043e-220	0.331166	0.612	0.495	9.18841e-216	Type I	CAMK2D
5.33167e-216	0.347544	0.49	0.374	1.95144e-211	Type I	VWA8
8.80125e-212	0.456289	0.259	0.164	3.22135e-207	Type I	LMCD1-AS1
2.42688e-209	0.468324	0.226	0.137	8.88262e-205	Type I	P4HA1
4.28369e-209	0.377306	0.358	0.25	1.56787e-204	Type I	TMEM131
1.26303e-207	0.465453	0.305	0.206	4.62281e-203	Type I	SIK2
7.73854e-207	0.47144	0.105	0.044	2.83238e-202	Type I	INSL6
9.50282e-205	0.457659	0.193	0.111	3.47813e-200	Type I	RASAL2
1.14756e-203	0.373665	0.354	0.248	4.20019e-199	Type I	ATP8A1
4.69382e-202	0.380955	0.361	0.256	1.71798e-197	Type I	FNIP1
2.32833e-197	0.338639	0.515	0.402	8.52193e-193	Type I	RALGAPA2
1.35869e-196	0.462364	0.109	0.048	4.97293e-192	Type I	TRIM38
3.04654e-196	0.438324	0.228	0.141	1.11506e-191	Type I	SACS
3.10977e-195	0.39629	0.22	0.133	1.13821e-190	Type I	ACOT11
1.24754e-193	0.338263	0.185	0.105	4.56614e-189	Type I	MYL12A
2.89984e-191	0.419529	0.306	0.21	1.06137e-186	Type I	ANKRD28
1.26551e-190	0.300026	0.599	0.484	4.6319e-186	Type I	PTPRM
1.63113e-187	0.38356	0.223	0.138	5.97012e-183	Type I	ARIH2
7.51674e-185	0.400582	0.162	0.089	2.7512e-180	Type I	SIRT2
2.74355e-184	0.360905	0.197	0.117	1.00417e-179	Type I	APBB2
2.43619e-183	0.397143	0.221	0.137	8.91669e-179	Type I	MTFR1
2.44847e-182	0.44536	0.19	0.113	8.96164e-178	Type I	AP005329.2
3.8486e-182	0.459788	0.177	0.103	1.40862e-177	Type I	IL12RB2
6.48453e-182	0.419974	0.292	0.199	2.3734e-177	Type I	ABHD15-AS1
2.48039e-180	0.391728	0.239	0.153	9.07846e-176	Type I	SMPX
1.24966e-179	0.383543	0.369	0.271	4.57388e-175	Type I	AAK1
2.29118e-179	0.361323	0.318	0.221	8.38594e-175	Type I	TRIM13
6.25137e-179	0.380683	0.221	0.138	2.28806e-174	Type I	LYPLAL1
5.31285e-177	0.335688	0.308	0.211	1.94456e-172	Type I	SPPL2A
7.26001e-177	0.398857	0.37	0.274	2.65724e-172	Type I	MLIP-AS1
1.57141e-176	0.252846	0.687	0.583	5.75151e-172	Type I	RBFOX2
1.07907e-175	0.419187	0.125	0.063	3.94952e-171	Type I	AC104365.1
6.93175e-175	0.262383	0.677	0.575	2.53709e-170	Type I	N4BP2L2
2.68946e-174	0.342312	0.366	0.266	9.84368e-170	Type I	KLHL24
1.04904e-173	0.48934	0.152	0.084	3.83959e-169	Type I	A2M
5.38677e-173	0.334086	0.243	0.157	1.97161e-168	Type I	ADGRA3
2.07904e-172	0.33352	0.421	0.319	7.60949e-168	Type I	PBX1
8.49734e-172	0.400451	0.184	0.109	3.11011e-167	Type I	GALNT17
1.31037e-171	0.262634	0.639	0.534	4.79609e-167	Type I	AOPEP
3.36868e-171	0.267956	0.585	0.477	1.23297e-166	Type I	TEAD1
2.69279e-170	0.436885	0.118	0.058	9.85588e-166	Type I	ANKRD2
1.29912e-169	0.414485	0.167	0.097	4.7549e-165	Type I	MALT1
4.76367e-168	0.408171	0.19	0.115	1.74355e-163	Type I	B4GALT5
4.72545e-167	0.429505	0.181	0.108	1.72956e-162	Type I	PLIN5
7.31902e-167	0.409213	0.148	0.082	2.67884e-162	Type I	PPARA
1.07567e-166	0.443711	0.205	0.129	3.93708e-162	Type I	FNIP2
9.73988e-166	0.407533	0.104	0.049	3.56489e-161	Type I	EOGT
3.00255e-165	0.354486	0.178	0.105	1.09896e-160	Type I	FCHSD2
2.41898e-163	0.386184	0.124	0.064	8.8537e-159	Type I	SPOCK1
1.27797e-160	0.381789	0.205	0.129	4.67751e-156	Type I	AC008250.1
8.22724e-160	0.341278	0.173	0.102	3.01125e-155	Type I	ITPR2
1.01281e-158	0.289643	0.425	0.325	3.707e-154	Type I	PDE7A
4.42376e-158	0.297353	0.391	0.292	1.61914e-153	Type I	NR3C2
2.44208e-157	0.322505	0.155	0.089	8.93825e-153	Type I	MROH7
3.66447e-157	0.384647	0.104	0.05	1.34123e-152	Type I	LINC00702
4.95044e-157	0.415721	0.199	0.126	1.81191e-152	Type I	TMLHE-AS1
5.13042e-157	0.333255	0.366	0.271	1.87778e-152	Type I	NAALADL2
5.29233e-157	0.340129	0.239	0.157	1.93705e-152	Type I	EEPD1
7.05513e-157	0.378865	0.174	0.105	2.58225e-152	Type I	UCKL1
3.42466e-156	0.346037	0.405	0.31	1.25346e-151	Type I	CEP85L
1.43552e-155	0.343508	0.264	0.181	5.25416e-151	Type I	AMOTL1
1.13275e-152	0.313329	0.228	0.148	4.14599e-148	Type I	TSPAN7
1.65565e-152	0.319398	0.386	0.29	6.05985e-148	Type I	SLMAP
1.75198e-152	0.369116	0.191	0.119	6.41243e-148	Type I	CFH
3.57229e-152	0.332588	0.336	0.245	1.30749e-147	Type I	TMEM38B
1.19453e-150	0.325029	0.293	0.205	4.3721e-146	Type I	COQ8A
6.32158e-150	0.353586	0.11	0.056	2.31376e-145	Type I	ZSCAN30
2.15281e-148	0.325134	0.357	0.266	7.87951e-144	Type I	MBNL2
1.01782e-146	0.381456	0.162	0.097	3.72533e-142	Type I	PHC2
4.15886e-145	0.357053	0.271	0.189	1.52219e-140	Type I	RAB11A
8.74792e-145	0.337565	0.241	0.163	3.20183e-140	Type I	ACSL1
5.97563e-144	0.364698	0.188	0.119	2.18714e-139	Type I	HADHA
6.72522e-142	0.366411	0.111	0.058	2.4615e-137	Type I	CYTH1
8.12465e-142	0.30415	0.278	0.194	2.9737e-137	Type I	PPP3CC
1.82442e-141	0.313603	0.2	0.127	6.67756e-137	Type I	ARID5B
2.38871e-138	0.339186	0.133	0.075	8.74291e-134	Type I	ATCAY
2.47658e-138	0.358568	0.206	0.135	9.06452e-134	Type I	MAP3K20-AS1
4.46854e-138	0.307684	0.126	0.07	1.63553e-133	Type I	AC117505.1
3.68223e-136	0.338833	0.107	0.055	1.34773e-131	Type I	PPM1H
9.87946e-135	0.362219	0.122	0.068	3.61598e-130	Type I	ME2
3.21904e-134	0.35735	0.356	0.271	1.1782e-129	Type I	PDE7B
1.55598e-133	0.333226	0.31	0.227	5.69506e-129	Type I	ROCK2
6.79732e-132	0.324675	0.323	0.24	2.48789e-127	Type I	FANCC
9.15143e-132	0.332193	0.126	0.071	3.34952e-127	Type I	C5orf56
3.22667e-131	0.337885	0.189	0.122	1.18099e-126	Type I	LTBP1
3.89504e-131	0.280883	0.383	0.294	1.42562e-126	Type I	ABCC9
4.52984e-131	0.269473	0.404	0.314	1.65797e-126	Type I	ZBTB20-AS5
6.58747e-129	0.339913	0.152	0.092	2.41108e-124	Type I	EEFSEC
6.88172e-129	0.324098	0.266	0.189	2.51878e-124	Type I	PEAK1
1.00109e-128	0.314491	0.123	0.069	3.66408e-124	Type I	PFN2
4.76155e-128	0.348564	0.123	0.069	1.74278e-123	Type I	PPP2CA
3.16178e-127	0.366756	0.124	0.07	1.15724e-122	Type I	OTOGL
7.76291e-127	0.351	0.249	0.175	2.8413e-122	Type I	AC092440.1
1.85556e-125	0.317143	0.13	0.076	6.79155e-121	Type I	RPL31
6.02677e-125	0.315604	0.107	0.057	2.20586e-120	Type I	CPT1B
1.0107e-124	0.304351	0.348	0.265	3.69927e-120	Type I	UGP2
8.6994e-124	0.346709	0.101	0.053	3.18407e-119	Type I	KREMEN1
4.16616e-123	0.326805	0.197	0.131	1.52486e-118	Type I	AC002463.1
6.23417e-123	0.40768	0.132	0.078	2.28177e-118	Type I	AL360178.1
9.91808e-123	0.312802	0.102	0.054	3.63011e-118	Type I	TMEM63B
2.88539e-122	0.282926	0.339	0.257	1.05608e-117	Type I	MEF2C-AS2
4.32021e-122	0.291936	0.109	0.059	1.58124e-117	Type I	EXOG
4.32884e-122	0.257723	0.39	0.302	1.5844e-117	Type I	SLC36A2
6.60652e-122	0.314718	0.176	0.114	2.41805e-117	Type I	DIP2B
7.76623e-122	0.320664	0.184	0.12	2.84252e-117	Type I	AC007319.1
1.64835e-121	0.321891	0.271	0.196	6.03313e-117	Type I	ZHX2
1.07071e-120	0.271848	0.272	0.196	3.91892e-116	Type I	FBXW7
4.47368e-120	0.336415	0.212	0.145	1.63741e-115	Type I	HOMER2
3.52592e-118	0.285611	0.358	0.276	1.29052e-113	Type I	DPF3
6.28091e-118	0.318548	0.179	0.116	2.29887e-113	Type I	HOOK2
6.1189e-117	0.29208	0.147	0.09	2.23958e-112	Type I	ACAT1
6.82658e-117	0.29869	0.25	0.178	2.4986e-112	Type I	TMEM65
4.33997e-116	0.272106	0.349	0.266	1.58847e-111	Type I	C10orf71
1.3513e-115	0.297987	0.244	0.173	4.9459e-111	Type I	ACADVL
5.32473e-114	0.324271	0.153	0.097	1.94891e-109	Type I	AC087286.2
1.31017e-112	0.281948	0.287	0.213	4.79534e-108	Type I	AIG1
7.29128e-112	0.306503	0.263	0.192	2.66868e-107	Type I	MAP2K5
2.28572e-111	0.287788	0.246	0.177	8.36596e-107	Type I	FOCAD
7.1363e-111	0.352161	0.211	0.147	2.61196e-106	Type I	C15orf41
1.54717e-110	0.35826	0.141	0.088	5.66278e-106	Type I	ZNF556
9.58606e-107	0.322309	0.13	0.079	3.50859e-102	Type I	EMG1
6.39113e-106	0.286087	0.107	0.061	2.33922e-101	Type I	BICD1
3.11002e-104	0.293457	0.293	0.222	1.1383e-99	Type I	AL353593.1
1.36758e-103	0.269348	0.129	0.079	5.00546e-99	Type I	HDDC2
2.54264e-103	0.277054	0.213	0.149	9.30633e-99	Type I	THSD4
1.88031e-102	0.292288	0.108	0.063	6.88213e-98	Type I	CNNM4
3.24762e-101	0.251283	0.132	0.082	1.18866e-96	Type I	ZNF704
3.66077e-101	0.276961	0.187	0.128	1.33988e-96	Type I	SH3D19
4.75572e-101	0.25974	0.194	0.133	1.74064e-96	Type I	DGLUCY
4.05653e-99	0.254445	0.108	0.063	1.48473e-94	Type I	MDH1
4.18247e-99	0.271143	0.129	0.08	1.53083e-94	Type I	CFL2
2.02621e-97	0.288259	0.181	0.125	7.41612e-93	Type I	BCKDHB
2.60434e-96	0.278457	0.165	0.111	9.53214e-92	Type I	IFRD1
2.16245e-95	0.281268	0.116	0.07	7.91477e-91	Type I	GOLIM4
6.31686e-95	0.265613	0.17	0.115	2.31204e-90	Type I	MGST3
1.5226e-93	0.268183	0.109	0.065	5.57286e-89	Type I	CEP83
1.68562e-92	0.286994	0.165	0.112	6.16954e-88	Type I	HIF1A-AS3
7.13961e-91	0.267561	0.123	0.077	2.61317e-86	Type I	NHLRC2
2.62905e-90	0.319697	0.158	0.107	9.62258e-86	Type I	AL138828.1
3.38619e-89	0.302584	0.172	0.119	1.23938e-84	Type I	TMEM164
5.65741e-89	0.286716	0.176	0.122	2.07067e-84	Type I	LPCAT3
5.68759e-88	0.253147	0.111	0.068	2.08172e-83	Type I	WBP4
8.29417e-88	0.253238	0.161	0.109	3.03575e-83	Type I	ME1
6.1544e-87	0.259995	0.283	0.219	2.25257e-82	Type I	TMLHE
1.70923e-83	0.25751	0.171	0.119	6.25595e-79	Type I	EPB41L5
1.329e-82	0.265728	0.123	0.079	4.86429e-78	Type I	AC010976.1
2.91643e-77	0.277836	0.126	0.084	1.06744e-72	Type I	PACS1
8.07396e-77	0.293438	0.117	0.076	2.95515e-72	Type I	AC007114.2
8.57941e-75	0.274759	0.131	0.088	3.14015e-70	Type I	CRYBG3
5.45437e-74	0.273371	0.117	0.077	1.99635e-69	Type I	PALM2-AKAP2
1.9349e-68	0.275515	0.176	0.129	7.08194e-64	Type I	AC022558.2
4.79403e-50	0.339627	0.218	0.176	1.75466e-45	Type I	LINC01505
0	1.65855	0.202	0.012	0	Type II	AC005323.1
0	1.94802	0.188	0.012	0	Type II	ATRNL1
0	1.40561	0.159	0.013	0	Type II	ACTN3
0	0.979622	0.109	0.018	0	Type II	LINC01151
0	0.886133	0.105	0.021	0	Type II	DAAM2
0	1.17041	0.175	0.028	0	Type II	ATP2B2
0	1.03016	0.105	0.029	0	Type II	GGT7
0	1.04509	0.138	0.03	0	Type II	NIBAN1
0	1.13208	0.125	0.031	0	Type II	PLXDC2
0	0.789932	0.118	0.034	0	Type II	PSTPIP2
0	1.08855	0.184	0.034	0	Type II	FBP2
0	1.17898	0.19	0.042	0	Type II	SH3RF2
0	0.799566	0.137	0.042	0	Type II	MSS51
0	0.954616	0.162	0.047	0	Type II	EGFR
0	2.70106	0.541	0.052	0	Type II	AC005323.2
0	1.18249	0.174	0.052	0	Type II	LRRC3B
0	1.11065	0.169	0.055	0	Type II	MYLK4
0	3.25064	0.61	0.055	0	Type II	MYH1
0	2.22603	0.495	0.056	0	Type II	MYBPC2
0	1.6368	0.28	0.061	0	Type II	ROBO1
0	0.903185	0.171	0.066	0	Type II	AL008633.1
0	0.679177	0.155	0.067	0	Type II	AC097662.1
0	1.44503	0.278	0.071	0	Type II	MLF1
0	0.952593	0.206	0.073	0	Type II	GPD2
0	0.618548	0.168	0.077	0	Type II	IGFBP5
0	1.0358	0.229	0.085	0	Type II	LANCL1-AS1
0	2.14954	0.655	0.086	0	Type II	TPM1
0	0.988142	0.257	0.087	0	Type II	PKM
0	1.41721	0.514	0.089	0	Type II	TNNI2
0	0.808591	0.185	0.091	0	Type II	NCOA3
0	2.92658	0.731	0.101	0	Type II	MYH2
0	2.97015	0.78	0.106	0	Type II	ATP2A1
0	0.859324	0.252	0.107	0	Type II	COL4A4
0	0.347242	0.411	0.111	0	Type II	TNNC2
0	1.07497	0.274	0.115	0	Type II	PHKA1
0	1.04299	0.268	0.116	0	Type II	NOS1
0	0.922416	0.265	0.123	0	Type II	GADL1
0	2.252	0.764	0.125	0	Type II	TNNT3
0	1.09967	0.313	0.128	0	Type II	PFKFB1
0	1.2219	0.344	0.129	0	Type II	PGM1
0	0.718869	0.241	0.134	0	Type II	LPIN1
0	1.29488	0.27	0.139	0	Type II	FKBP5
0	1.82233	0.469	0.143	0	Type II	ARHGAP6
0	1.33151	0.594	0.144	0	Type II	MYLPF
0	0.943845	0.376	0.146	0	Type II	ENO3
0	1.05339	0.359	0.158	0	Type II	PFKM
0	1.12195	0.347	0.159	0	Type II	RNF150
0	0.996347	0.334	0.16	0	Type II	GPI
0	0.93422	0.305	0.16	0	Type II	PPP1R3C
0	0.819062	0.322	0.176	0	Type II	TMEM233
0	1.17917	0.445	0.183	0	Type II	COL4A3
0	0.876026	0.34	0.196	0	Type II	SLC7A2
0	1.09418	0.378	0.201	0	Type II	PLCL1
0	0.705339	0.331	0.201	0	Type II	CASQ1
0	0.814901	0.359	0.209	0	Type II	EGF
0	1.06266	0.411	0.211	0	Type II	NEDD4
0	0.671244	0.334	0.213	0	Type II	USP53
0	0.842521	0.363	0.221	0	Type II	PDZRN3
0	1.08616	0.417	0.223	0	Type II	ANKS1B
0	0.729762	0.345	0.225	0	Type II	NCALD
0	0.832009	0.41	0.255	0	Type II	PPP1R3A
0	1.29425	0.509	0.26	0	Type II	PHTF2
0	0.753251	0.384	0.263	0	Type II	UNC13B
0	0.801096	0.433	0.263	0	Type II	PYGM
0	1.16755	0.505	0.27	0	Type II	RHOBTB1
0	1.27867	0.584	0.272	0	Type II	KCNQ5
0	0.812126	0.431	0.286	0	Type II	AC015878.1
0	1.18682	0.617	0.298	0	Type II	FGF13
0	0.742736	0.449	0.298	0	Type II	PPP3CA
0	0.700947	0.487	0.342	0	Type II	GHR
0	0.685433	0.485	0.342	0	Type II	FHIT
0	0.767952	0.483	0.36	0	Type II	NPHP1
0	1.00875	0.581	0.371	0	Type II	DIAPH2
0	0.8246	0.555	0.384	0	Type II	SETBP1
0	1.16648	0.676	0.399	0	Type II	MYL1
0	0.973738	0.581	0.419	0	Type II	ANK2
0	0.933557	0.644	0.453	0	Type II	AGL
0	0.539334	0.585	0.481	0	Type II	AMPD1
0	1.15044	0.723	0.52	0	Type II	DENND2C
0	0.438311	0.733	0.654	0	Type II	SOX6
0	0.855847	0.829	0.672	0	Type II	RORA
0	0.728473	0.86	0.68	0	Type II	PDE4D
0	0.622666	0.764	0.687	0	Type II	CMSS1
0	0.545026	0.87	0.782	0	Type II	MBNL1
0	0.472506	0.898	0.825	0	Type II	CTNNA3
0	0.98871	0.943	0.876	0	Type II	FILIP1L
0	0.418548	0.992	0.977	0	Type II	TRDN
2.03833e-307	0.755944	0.109	0.04	7.4605e-303	Type II	KLHL29
1.16623e-305	0.75623	0.183	0.092	4.26852e-301	Type II	LMOD1
2.84207e-305	0.704332	0.35	0.234	1.04023e-300	Type II	DEPTOR
1.991e-301	0.364523	0.815	0.756	7.28726e-297	Type II	DTNA
1.12765e-295	0.632315	0.404	0.29	4.12733e-291	Type II	SLC25A12
1.50634e-290	0.604782	0.465	0.35	5.51337e-286	Type II	PEBP4
2.76103e-285	0.284201	0.923	0.889	1.01057e-280	Type II	ZBTB20
1.44171e-279	0.777202	0.165	0.081	5.27679e-275	Type II	PXDNL
2.79992e-279	0.626224	0.339	0.229	1.0248e-274	Type II	AFF1
3.36565e-277	0.704336	0.167	0.083	1.23186e-272	Type II	AHCYL1
7.76025e-275	0.572567	0.587	0.49	2.84033e-270	Type II	SESN1
5.5255e-264	0.322404	0.864	0.816	2.02239e-259	Type II	MLIP
6.9393e-261	0.60275	0.273	0.17	2.53985e-256	Type II	MYOZ3
1.72052e-259	0.562165	0.487	0.389	6.29726e-255	Type II	TBC1D4
6.29943e-257	0.836824	0.254	0.158	2.30565e-252	Type II	PTPRG
3.59091e-256	0.66782	0.356	0.253	1.31431e-251	Type II	SLC24A3
1.0585e-252	0.731946	0.245	0.15	3.87421e-248	Type II	ART3
9.11959e-252	0.620053	0.369	0.262	3.33786e-247	Type II	ASB15
1.27815e-241	0.261653	0.883	0.84	4.67816e-237	Type II	CMYA5
3.85934e-233	0.568775	0.227	0.135	1.41256e-228	Type II	SNTB1
1.66435e-232	0.555427	0.111	0.048	6.09167e-228	Type II	PRKAG3
1.12031e-231	0.331029	0.785	0.724	4.10043e-227	Type II	CDH13
3.59767e-229	0.627982	0.194	0.111	1.31678e-224	Type II	AC093879.1
7.00428e-227	0.546212	0.324	0.224	2.56364e-222	Type II	OSBPL6
1.27515e-221	0.390692	0.834	0.777	4.66717e-217	Type II	MIR133A1HG
3.42543e-221	0.606913	0.288	0.193	1.25374e-216	Type II	AC002070.1
1.3498e-220	0.629056	0.169	0.092	4.94042e-216	Type II	AL049828.1
2.22155e-219	0.574	0.264	0.171	8.1311e-215	Type II	WNK2
1.21891e-215	0.547185	0.321	0.226	4.46132e-211	Type II	STIM1
1.53553e-200	0.565391	0.535	0.46	5.62021e-196	Type II	WDPCP
1.33882e-199	0.589101	0.177	0.102	4.90023e-195	Type II	ASB2
5.85398e-198	0.453367	0.331	0.234	2.14262e-193	Type II	MYOZ1
4.45411e-197	0.653034	0.139	0.073	1.63025e-192	Type II	NPAS3
1.36494e-196	0.522245	0.192	0.112	4.9958e-192	Type II	IGFN1
6.69262e-195	0.447778	0.717	0.663	2.44957e-190	Type II	ATP1A2
4.12474e-194	0.539063	0.216	0.134	1.5097e-189	Type II	FHL3
1.14943e-193	0.590995	0.2	0.122	4.20702e-189	Type II	FAM13A
1.34947e-193	0.573263	0.249	0.166	4.93921e-189	Type II	PLCD4
5.45671e-192	0.483125	0.101	0.045	1.99721e-187	Type II	TESK2
2.16886e-183	0.572198	0.294	0.206	7.93826e-179	Type II	ANGPT1
5.00697e-173	0.501159	0.215	0.137	1.8326e-168	Type II	PRSS23
6.39485e-170	0.521844	0.104	0.05	2.34058e-165	Type II	G0S2
7.13119e-169	0.489026	0.351	0.263	2.61009e-164	Type II	PRR16
1.76038e-167	0.466456	0.1	0.048	6.44316e-163	Type II	EEF2K
2.68969e-166	0.530263	0.126	0.067	9.84454e-162	Type II	PPP3R1
7.18361e-166	0.470386	0.159	0.093	2.62927e-161	Type II	SYTL3
2.05628e-165	0.524106	0.334	0.251	7.5262e-161	Type II	MIA2
7.77109e-164	0.268705	0.816	0.78	2.8443e-159	Type II	CACNA2D1
4.83338e-163	0.529679	0.295	0.215	1.76907e-158	Type II	LINC00472
5.14353e-163	0.506272	0.146	0.083	1.88259e-158	Type II	GBX1
7.35927e-159	0.46892	0.358	0.275	2.69356e-154	Type II	UACA
5.69185e-155	0.581104	0.192	0.123	2.08327e-150	Type II	HECTD2
8.81899e-155	0.434781	0.557	0.489	3.22784e-150	Type II	FBXO32
8.57427e-154	0.554306	0.109	0.057	3.13827e-149	Type II	BCAS2
2.02054e-153	0.48817	0.299	0.219	7.39536e-149	Type II	CHD2
5.71501e-153	0.339603	0.694	0.642	2.09175e-148	Type II	MYPN
4.13211e-152	0.49932	0.263	0.187	1.51239e-147	Type II	ITGA7
3.04662e-150	0.593473	0.234	0.161	1.11509e-145	Type II	PCGF5
4.17923e-149	0.473877	0.129	0.072	1.52964e-144	Type II	SMTNL2
3.00109e-147	0.507585	0.283	0.205	1.09843e-142	Type II	MAPRE2
1.07233e-144	0.468649	0.274	0.199	3.92483e-140	Type II	BNC2
5.31129e-143	0.489285	0.339	0.262	1.94399e-138	Type II	PHKG1
6.22261e-143	0.45778	0.166	0.102	2.27754e-138	Type II	PAK1
8.33676e-141	0.420414	0.527	0.461	3.05134e-136	Type II	EYA4
2.60761e-139	0.460182	0.205	0.137	9.5441e-135	Type II	CACNB1
1.24514e-138	0.474245	0.154	0.095	4.55734e-134	Type II	SAR1B
3.65518e-137	0.419859	0.408	0.334	1.33783e-132	Type II	UBE2G1
4.69899e-137	0.453385	0.106	0.057	1.71988e-132	Type II	AKT3
1.04734e-136	0.55354	0.139	0.083	3.83338e-132	Type II	TBC1D1
2.17216e-134	0.470676	0.182	0.118	7.95032e-130	Type II	SUGCT
2.75934e-134	0.45891	0.295	0.223	1.00994e-129	Type II	MSRB3
8.58215e-134	0.426362	0.42	0.347	3.14115e-129	Type II	HDAC9
2.7161e-132	0.520014	0.215	0.148	9.94118e-128	Type II	SLC12A2
9.29189e-130	0.469928	0.274	0.203	3.40093e-125	Type II	EPS15
1.90745e-122	0.483775	0.191	0.13	6.98145e-118	Type II	NREP
8.47108e-122	0.430629	0.381	0.309	3.1005e-117	Type II	TMEM161B-AS1
7.6062e-120	0.560841	0.344	0.272	2.78395e-115	Type II	FAM189A2
1.64114e-118	0.547779	0.349	0.282	6.00674e-114	Type II	AC008014.1
8.13613e-117	0.310246	0.638	0.584	2.9779e-112	Type II	ADCY2
3.91536e-116	0.463579	0.14	0.088	1.43306e-111	Type II	SLC29A2
7.11129e-116	0.43793	0.141	0.088	2.6028e-111	Type II	PREP
1.01714e-115	0.472835	0.149	0.095	3.72283e-111	Type II	FAM126A
1.31595e-115	0.469406	0.103	0.058	4.8165e-111	Type II	TMED4
1.15245e-114	0.425793	0.112	0.065	4.2181e-110	Type II	LANCL1
5.85927e-113	0.539551	0.339	0.266	2.14455e-108	Type II	PDK4
2.25068e-112	0.47161	0.246	0.182	8.23772e-108	Type II	MRTFB
6.06113e-111	0.392726	0.172	0.115	2.21843e-106	Type II	NDRG2
5.71997e-110	0.406527	0.143	0.09	2.09357e-105	Type II	MN1
6.82477e-110	0.285399	0.63	0.578	2.49793e-105	Type II	PRKN
1.27996e-109	0.394622	0.4	0.336	4.68477e-105	Type II	TNKS2
3.79974e-109	0.375219	0.103	0.058	1.39074e-104	Type II	SEMA6D
4.12281e-108	0.363242	0.153	0.098	1.50899e-103	Type II	MAOB
1.37062e-106	0.537601	0.211	0.152	5.01661e-102	Type II	CADM1
1.80861e-105	0.377271	0.108	0.063	6.61968e-101	Type II	CRTC3
1.91801e-105	0.357104	0.379	0.306	7.02012e-101	Type II	PLCB1
1.36979e-103	0.39306	0.177	0.12	5.01357e-99	Type II	BSG
1.30702e-102	0.416933	0.22	0.161	4.78382e-98	Type II	HIBCH
3.28838e-102	0.405389	0.191	0.134	1.20358e-97	Type II	RNF144B
5.82464e-101	0.421344	0.204	0.147	2.13188e-96	Type II	MED14
1.25708e-97	0.376699	0.319	0.256	4.60105e-93	Type II	SYPL2
4.21479e-96	0.281479	0.23	0.17	1.54265e-91	Type II	WWOX
1.38403e-95	0.488326	0.329	0.27	5.0657e-91	Type II	ERBB4
8.43639e-95	0.39314	0.198	0.143	3.0878e-90	Type II	NEDD4L
6.71263e-94	0.323052	0.485	0.43	2.45689e-89	Type II	CAPN3
3.838e-93	0.381912	0.162	0.111	1.40475e-88	Type II	KANTR
3.3677e-90	0.43983	0.121	0.077	1.23261e-85	Type II	PCYOX1
1.23475e-89	0.409973	0.175	0.123	4.51931e-85	Type II	MYLIP
2.64216e-88	0.382176	0.266	0.207	9.67058e-84	Type II	RPL3L
9.79073e-87	0.417462	0.101	0.062	3.58351e-82	Type II	STEAP1B
2.01613e-86	0.402382	0.113	0.072	7.37925e-82	Type II	ARHGAP18
4.64128e-86	0.36231	0.138	0.092	1.69876e-81	Type II	SLC38A4
1.36199e-85	0.330596	0.641	0.615	4.98502e-81	Type II	PRKG1
4.49167e-85	0.38063	0.215	0.161	1.64399e-80	Type II	VCL
1.31795e-83	0.390061	0.109	0.069	4.82382e-79	Type II	CALM2
1.46678e-83	0.388138	0.176	0.126	5.36856e-79	Type II	HNRNPM
8.92915e-83	0.361353	0.324	0.265	3.26816e-78	Type II	PATJ
1.7468e-82	0.418706	0.191	0.139	6.39346e-78	Type II	DIAPH2-AS1
2.78802e-82	0.334246	0.455	0.405	1.02044e-77	Type II	KIF13A
4.27429e-82	0.301411	0.515	0.472	1.56443e-77	Type II	ANK3
9.83009e-82	0.345329	0.107	0.068	3.59791e-77	Type II	CUEDC1
1.0555e-80	0.318093	0.44	0.385	3.86325e-76	Type II	CECR2
2.15866e-79	0.343325	0.189	0.139	7.90093e-75	Type II	SGMS1
4.84978e-79	0.383254	0.259	0.205	1.77507e-74	Type II	HOMER1
3.0173e-78	0.435336	0.104	0.066	1.10436e-73	Type II	PRKCH
7.08512e-77	0.396689	0.147	0.103	2.59323e-72	Type II	FAM168A
1.12514e-76	0.324736	0.38	0.326	4.11811e-72	Type II	JPH1
2.17436e-74	0.372983	0.158	0.113	7.95838e-70	Type II	ZYG11B
3.23029e-74	0.31094	0.221	0.168	1.18232e-69	Type II	RCSD1
1.89749e-73	0.330097	0.186	0.138	6.94501e-69	Type II	ACSL3
9.4661e-72	0.351759	0.221	0.171	3.46469e-67	Type II	SCN4A
3.28938e-71	0.348388	0.192	0.144	1.20395e-66	Type II	LNPK
3.8818e-71	0.353206	0.187	0.14	1.42078e-66	Type II	DOK5
4.10081e-70	0.338037	0.282	0.23	1.50094e-65	Type II	ACACB
6.09461e-70	0.343862	0.196	0.147	2.23069e-65	Type II	CLCN1
5.12111e-69	0.341497	0.109	0.072	1.87438e-64	Type II	CLYBL
3.65488e-67	0.307532	0.222	0.173	1.33772e-62	Type II	SLN
4.02247e-67	0.298126	0.431	0.379	1.47226e-62	Type II	TXNIP
4.5177e-67	0.34058	0.197	0.15	1.65352e-62	Type II	OPTN
1.0089e-66	0.334185	0.183	0.137	3.69266e-62	Type II	SLC25A13
5.74882e-66	0.352825	0.176	0.132	2.10412e-61	Type II	TMOD1
3.85339e-65	0.337327	0.128	0.089	1.41038e-60	Type II	ZNF423
5.72844e-65	0.266775	0.534	0.495	2.09667e-60	Type II	FBXL17
1.04968e-64	0.332867	0.192	0.147	3.84194e-60	Type II	MLXIP
1.3645e-64	0.334063	0.215	0.168	4.99422e-60	Type II	HSPB8
8.51125e-64	0.33525	0.212	0.165	3.1152e-59	Type II	SOBP
5.56022e-63	0.369304	0.226	0.179	2.0351e-58	Type II	AC012404.1
7.27885e-63	0.324497	0.112	0.076	2.66413e-58	Type II	RFX3
1.72642e-60	0.354374	0.149	0.109	6.31888e-56	Type II	GMPR
4.69632e-60	0.3628	0.204	0.16	1.7189e-55	Type II	STARD4-AS1
6.21101e-60	0.327284	0.315	0.269	2.27329e-55	Type II	KAT6B
7.50277e-60	0.340553	0.244	0.198	2.74609e-55	Type II	CASTOR3
1.15299e-59	0.279762	0.445	0.403	4.22007e-55	Type II	JMJD1C
1.78496e-59	0.448851	0.233	0.192	6.53312e-55	Type II	RC3H1
1.79558e-59	0.322078	0.206	0.162	6.572e-55	Type II	FBXO34
1.39924e-58	0.348953	0.103	0.07	5.12137e-54	Type II	PIK3CB
2.65308e-58	0.337666	0.303	0.258	9.71056e-54	Type II	PHKB
4.46414e-58	0.317318	0.354	0.309	1.63392e-53	Type II	ASPH
1.07169e-57	0.310019	0.264	0.217	3.9225e-53	Type II	GLG1
7.31348e-56	0.361145	0.251	0.207	2.67681e-51	Type II	PPP3CB
7.9589e-56	0.329695	0.12	0.085	2.91304e-51	Type II	ZC3H6
9.20168e-56	0.40206	0.286	0.243	3.36791e-51	Type II	RNPC3
7.9526e-55	0.272386	0.295	0.246	2.91073e-50	Type II	IFNG-AS1
9.85461e-55	0.334379	0.2	0.157	3.60688e-50	Type II	BCL2
1.3092e-53	0.3952	0.221	0.179	4.7918e-49	Type II	FOXO1
1.53448e-53	0.42044	0.154	0.117	5.61636e-49	Type II	NRIP1
6.92493e-53	0.369057	0.141	0.106	2.5346e-48	Type II	SF3A3
7.60106e-53	0.27087	0.105	0.073	2.78206e-48	Type II	AC025171.1
6.25341e-52	0.268918	0.129	0.094	2.28881e-47	Type II	MAP3K14
8.91152e-52	0.304147	0.207	0.166	3.2617e-47	Type II	RABEP1
1.39305e-51	0.3153	0.365	0.326	5.09869e-47	Type II	TUT4
1.51652e-51	0.29406	0.146	0.109	5.5506e-47	Type II	NT5C3A
1.7068e-51	0.269202	0.39	0.35	6.24707e-47	Type II	LRRFIP2
3.34336e-51	0.318061	0.133	0.098	1.2237e-46	Type II	AR
4.31523e-51	0.329935	0.229	0.188	1.57942e-46	Type II	TRPS1
3.58927e-50	0.29164	0.251	0.208	1.31371e-45	Type II	TTC28
7.13132e-50	0.262275	0.133	0.098	2.61013e-45	Type II	NBEA
2.596e-49	0.343025	0.189	0.15	9.50162e-45	Type II	PPP1R27
5.59301e-49	0.306347	0.345	0.304	2.0471e-44	Type II	CLTCL1
2.90314e-48	0.261159	0.532	0.5	1.06258e-43	Type II	KTN1
1.38608e-46	0.311923	0.175	0.139	5.07321e-42	Type II	PTBP2
2.96138e-46	0.330823	0.163	0.128	1.08389e-41	Type II	CEP85
4.30618e-46	0.256633	0.399	0.359	1.5761e-41	Type II	FSD2
1.45248e-45	0.30791	0.29	0.251	5.31622e-41	Type II	EFCAB2
1.91609e-45	0.25116	0.445	0.404	7.01306e-41	Type II	ZBTB16
8.86779e-45	0.30391	0.101	0.072	3.2457e-40	Type II	PFKFB3
1.28419e-44	0.30104	0.371	0.333	4.70026e-40	Type II	ITIH4
2.25678e-44	0.367979	0.169	0.135	8.26004e-40	Type II	LINC01184
7.54836e-44	0.289322	0.112	0.082	2.76277e-39	Type II	OSBP
7.51324e-43	0.325987	0.101	0.074	2.74992e-38	Type II	ACVR1
1.12838e-41	0.269337	0.451	0.423	4.12998e-37	Type II	TNRC6B
1.23733e-41	0.288142	0.174	0.139	4.52877e-37	Type II	ACTB
2.72532e-41	0.320799	0.161	0.128	9.97494e-37	Type II	LDLRAD4
5.8649e-41	0.2686	0.1	0.072	2.14661e-36	Type II	ADSSL1
7.48097e-41	0.302337	0.151	0.119	2.73811e-36	Type II	APPL1
1.12278e-40	0.282435	0.308	0.271	4.10947e-36	Type II	SNX1
1.86947e-40	0.308486	0.111	0.082	6.84245e-36	Type II	TRIM63
3.64133e-40	0.279641	0.109	0.081	1.33276e-35	Type II	UBAC1
7.53488e-40	0.305083	0.109	0.081	2.75784e-35	Type II	TLE1
8.65003e-40	0.286858	0.117	0.088	3.166e-35	Type II	AVIL
5.20615e-39	0.324225	0.209	0.174	1.9055e-34	Type II	GANC
4.32854e-38	0.259028	0.325	0.287	1.58429e-33	Type II	YBX3
1.07083e-37	0.255063	0.286	0.249	3.91934e-33	Type II	ANK1
3.08977e-37	0.269183	0.106	0.079	1.13089e-32	Type II	SREBF2
3.54e-37	0.282441	0.189	0.154	1.29567e-32	Type II	SLC2A4
4.80625e-37	0.256452	0.183	0.149	1.75914e-32	Type II	MRTFA
6.42623e-37	0.289707	0.188	0.155	2.35207e-32	Type II	RPS6KA2
8.08102e-37	0.267259	0.246	0.211	2.95773e-32	Type II	NEO1
1.04687e-36	0.291481	0.135	0.105	3.83165e-32	Type II	SPATS2L
1.92234e-36	0.268582	0.304	0.269	7.03596e-32	Type II	TMEM117
4.71196e-36	0.281093	0.118	0.09	1.72462e-31	Type II	ASB8
2.07117e-35	0.281166	0.149	0.119	7.58068e-31	Type II	ZHX3
3.02661e-35	0.262866	0.128	0.099	1.10777e-30	Type II	TTLL7
2.41476e-34	0.26741	0.193	0.161	8.83826e-30	Type II	PDLIM7
1.76601e-33	0.262308	0.307	0.271	6.46376e-29	Type II	CLIC5
3.43183e-32	0.290449	0.107	0.082	1.25608e-27	Type II	ITGB3BP
5.01589e-32	0.253839	0.127	0.1	1.83587e-27	Type II	TOGARAM1
5.07813e-32	0.27305	0.287	0.255	1.85865e-27	Type II	TRAPPC9
8.32831e-32	0.256637	0.228	0.196	3.04824e-27	Type II	PPARGC1A
4.87015e-31	0.282679	0.27	0.239	1.78252e-26	Type II	ADK
3.34563e-30	0.272526	0.207	0.176	1.22453e-25	Type II	RAB7A
2.02346e-29	0.266234	0.129	0.103	7.40606e-25	Type II	SCGB2B2
1.16462e-27	0.273975	0.159	0.132	4.26264e-23	Type II	PHF20
5.84072e-27	0.295303	0.152	0.127	2.13776e-22	Type II	RORA-AS1
1.19079e-26	0.271095	0.103	0.081	4.35843e-22	Type II	RNF213
1.74101e-26	0.254141	0.156	0.13	6.37227e-22	Type II	CS
1.99627e-26	0.278818	0.314	0.288	7.30653e-22	Type II	RFX7
2.67284e-26	0.272999	0.16	0.134	9.78285e-22	Type II	UBE2D2
7.53187e-26	0.281058	0.28	0.253	2.75674e-21	Type II	USP25
3.10363e-25	0.285361	0.169	0.144	1.13596e-20	Type II	IKBKB
8.26945e-25	0.252351	0.124	0.101	3.0267e-20	Type II	YIPF7
1.61764e-24	0.257766	0.144	0.12	5.92071e-20	Type II	LCORL
1.83393e-24	0.403207	0.195	0.172	6.71238e-20	Type II	NKAIN2
2.0388e-23	0.295012	0.235	0.21	7.46222e-19	Type II	AC073475.1
2.30262e-23	0.275645	0.181	0.156	8.42781e-19	Type II	BACH1
2.70767e-18	0.264654	0.115	0.097	9.91036e-14	Type II	ASB14
0	7.74702	0.584	0.007	0	Type I MEG3hi	MEG3
0	1.67436	0.844	0.281	0	Type I MEG3hi	LINC01091
0	1.44741	0.784	0.237	0	Type I MEG3hi	TTTY14
0	2.88167	0.614	0.072	0	Type I MEG3hi	MYOZ2
0	1.80511	0.801	0.26	0	Type I MEG3hi	PTPRQ
0	1.54402	0.794	0.256	0	Type I MEG3hi	ESRRG
0	3.46422	0.604	0.066	0	Type I MEG3hi	AP002518.2
0	1.9597	0.773	0.237	0	Type I MEG3hi	MYOM2
0	1.17633	0.92	0.394	0	Type I MEG3hi	XPO4
0	0.815934	0.931	0.409	0	Type I MEG3hi	ATP2A2
0	1.45991	0.719	0.2	0	Type I MEG3hi	MYL3
0	1.78519	0.736	0.218	0	Type I MEG3hi	MLIP-AS1
0	0.810302	0.849	0.334	0	Type I MEG3hi	MYH7
0	2.69509	0.574	0.065	0	Type I MEG3hi	AMOTL1
0	0.487601	0.912	0.405	0	Type I MEG3hi	TNNT1
0	0.937051	0.802	0.304	0	Type I MEG3hi	PDK4
0	0.856223	0.782	0.285	0	Type I MEG3hi	TNNI1
0	1.90545	0.618	0.125	0	Type I MEG3hi	CA3
0	2.25318	0.593	0.102	0	Type I MEG3hi	WIPF3
0	1.36988	0.729	0.243	0	Type I MEG3hi	MCU
0	1.64238	0.742	0.261	0	Type I MEG3hi	FMNL2
0	0.81718	0.766	0.286	0	Type I MEG3hi	TPM3
0	1.19673	0.784	0.305	0	Type I MEG3hi	FOXN3
0	2.18516	0.568	0.099	0	Type I MEG3hi	HDAC2-AS2
0	1.33199	0.647	0.179	0	Type I MEG3hi	MYH7B
0	1.51084	0.643	0.185	0	Type I MEG3hi	CEP128
0	1.03088	0.701	0.25	0	Type I MEG3hi	MYOM3
0	1.42881	0.675	0.225	0	Type I MEG3hi	PDE7B
0	3.37615	0.497	0.048	0	Type I MEG3hi	LPL
0	8.51974	0.45	0.004	0	Type I MEG3hi	MEG8
0	0.855285	0.686	0.244	0	Type I MEG3hi	MYL2
0	2.27498	0.512	0.071	0	Type I MEG3hi	CASQ2
0	3.92018	0.47	0.031	0	Type I MEG3hi	AC099066.1
0	2.64714	0.493	0.058	0	Type I MEG3hi	AC002451.1
0	2.35281	0.497	0.068	0	Type I MEG3hi	SACS
0	2.50212	0.55	0.125	0	Type I MEG3hi	LINC01505
0	1.4203	0.586	0.162	0	Type I MEG3hi	SYNE1
0	0.96641	0.684	0.261	0	Type I MEG3hi	NT5C2
0	1.27599	0.866	0.446	0	Type I MEG3hi	AC106791.1
0	0.954247	0.898	0.48	0	Type I MEG3hi	CD36
0	2.44827	0.481	0.064	0	Type I MEG3hi	CREB5
0	0.890429	0.701	0.286	0	Type I MEG3hi	ALPK3
0	0.84886	0.82	0.405	0	Type I MEG3hi	AOPEP
0	1.83818	0.539	0.125	0	Type I MEG3hi	FANCC
0	0.984642	0.638	0.226	0	Type I MEG3hi	CRIM1
0	0.855199	0.795	0.383	0	Type I MEG3hi	MYO18B
0	0.961281	0.801	0.39	0	Type I MEG3hi	ARPP21
0	0.875886	0.718	0.311	0	Type I MEG3hi	LRRFIP1
0	1.17657	0.579	0.173	0	Type I MEG3hi	ZNF385B
0	0.848575	0.785	0.381	0	Type I MEG3hi	CAMK2D
0	1.0939	0.605	0.203	0	Type I MEG3hi	SIK2
0	0.816656	0.848	0.447	0	Type I MEG3hi	LIMCH1
0	0.83404	0.705	0.305	0	Type I MEG3hi	USP54
0	0.91754	0.842	0.453	0	Type I MEG3hi	LINC00486
0	0.744135	0.842	0.455	0	Type I MEG3hi	SORBS1
0	0.834304	0.9	0.515	0	Type I MEG3hi	ACTN2
0	0.95327	0.586	0.202	0	Type I MEG3hi	HS3ST5
0	2.53676	0.437	0.054	0	Type I MEG3hi	AC007319.1
0	0.912586	0.64	0.258	0	Type I MEG3hi	PALMD
0	1.28383	0.541	0.159	0	Type I MEG3hi	MEF2C-AS2
0	0.731389	0.64	0.259	0	Type I MEG3hi	VPS8
0	1.73216	0.484	0.104	0	Type I MEG3hi	BTD
0	0.774202	0.659	0.279	0	Type I MEG3hi	MICU1
0	1.2913	0.539	0.16	0	Type I MEG3hi	TRIM13
0	2.94877	0.42	0.042	0	Type I MEG3hi	AC099066.2
0	1.09784	0.517	0.147	0	Type I MEG3hi	HADHB
0	2.27956	0.443	0.073	0	Type I MEG3hi	AL360178.1
0	1.1498	0.543	0.175	0	Type I MEG3hi	PLPP1
0	0.858514	0.658	0.291	0	Type I MEG3hi	PBX1
0	0.714026	0.598	0.231	0	Type I MEG3hi	UGP2
0	1.23238	0.51	0.143	0	Type I MEG3hi	ANKRD28
0	0.845517	0.638	0.271	0	Type I MEG3hi	ZBTB20-AS5
0	1.11207	0.878	0.512	0	Type I MEG3hi	TRDN-AS1
0	1.25047	0.518	0.153	0	Type I MEG3hi	MFSD4B
0	1.17306	0.517	0.157	0	Type I MEG3hi	PPP3CB-AS1
0	2.07351	0.443	0.084	0	Type I MEG3hi	AL138828.1
0	0.915229	0.555	0.197	0	Type I MEG3hi	ARHGEF12
0	0.859597	0.554	0.198	0	Type I MEG3hi	BEST3
0	0.864668	0.603	0.248	0	Type I MEG3hi	AC108734.4
0	0.93045	0.558	0.205	0	Type I MEG3hi	AC008496.2
0	1.44302	0.468	0.117	0	Type I MEG3hi	AL139383.1
0	0.795524	0.56	0.211	0	Type I MEG3hi	FEZ2
0	1.39067	0.462	0.113	0	Type I MEG3hi	CSRP3
0	1.98865	0.427	0.078	0	Type I MEG3hi	AC019068.1
0	0.81784	0.523	0.175	0	Type I MEG3hi	LAMA2
0	1.72	0.431	0.085	0	Type I MEG3hi	COLQ
0	1.43146	0.471	0.127	0	Type I MEG3hi	RAB11A
0	0.886893	0.53	0.192	0	Type I MEG3hi	AL353593.1
0	1.13365	0.481	0.143	0	Type I MEG3hi	MTFR1
0	0.886334	0.528	0.192	0	Type I MEG3hi	SLCO5A1
0	0.969118	0.494	0.159	0	Type I MEG3hi	VPS13C
0	0.780656	0.498	0.171	0	Type I MEG3hi	FLRT2
0	1.10935	0.471	0.145	0	Type I MEG3hi	JAK2
0	1.59538	0.422	0.098	0	Type I MEG3hi	BCO2
0	1.62253	0.426	0.104	0	Type I MEG3hi	MAP3K20-AS1
0	1.139	0.46	0.138	0	Type I MEG3hi	FBXW7
0	0.930605	0.449	0.127	0	Type I MEG3hi	ARID5B
0	4.47404	0.333	0.011	0	Type I MEG3hi	ATCAY
0	1.87172	0.379	0.058	0	Type I MEG3hi	TMEM135
0	1.11844	0.449	0.129	0	Type I MEG3hi	GPAT3
0	1.17474	0.45	0.132	0	Type I MEG3hi	ABHD15-AS1
0	1.15553	0.459	0.142	0	Type I MEG3hi	LMCD1-AS1
0	1.86933	0.381	0.064	0	Type I MEG3hi	ARHGAP24
0	2.42914	0.354	0.04	0	Type I MEG3hi	JAZF1
0	1.55135	0.408	0.094	0	Type I MEG3hi	TENM3
0	2.32549	0.357	0.045	0	Type I MEG3hi	CFH
0	1.52979	0.393	0.081	0	Type I MEG3hi	APBB2
0	1.17756	0.431	0.124	0	Type I MEG3hi	AL445259.1
0	1.25858	0.4	0.095	0	Type I MEG3hi	HADHA
0	1.44941	0.401	0.097	0	Type I MEG3hi	AC002463.1
0	1.00487	0.41	0.106	0	Type I MEG3hi	USP9Y
0	1.07084	0.439	0.138	0	Type I MEG3hi	CBR4
0	2.41138	0.331	0.032	0	Type I MEG3hi	ZNF385D
0	1.21592	0.407	0.112	0	Type I MEG3hi	TMEM108
0	1.30593	0.386	0.092	0	Type I MEG3hi	ESYT2
0	1.06152	0.417	0.127	0	Type I MEG3hi	EGLN1
0	1.58024	0.361	0.073	0	Type I MEG3hi	CFLAR-AS1
0	4.20064	0.298	0.01	0	Type I MEG3hi	PTPRD
0	2.7817	0.314	0.027	0	Type I MEG3hi	COL5A2
0	1.17421	0.399	0.113	0	Type I MEG3hi	ENAH
0	1.88577	0.334	0.05	0	Type I MEG3hi	TFPI
0	0.897924	0.406	0.123	0	Type I MEG3hi	ASB18
0	1.56994	0.355	0.072	0	Type I MEG3hi	AC087286.2
0	1.67193	0.958	0.675	0	Type I MEG3hi	RIF1
0	1.09237	0.393	0.112	0	Type I MEG3hi	AC008250.1
0	0.91536	0.397	0.119	0	Type I MEG3hi	EEPD1
0	1.59354	0.334	0.056	0	Type I MEG3hi	EYA1
0	3.11298	0.298	0.021	0	Type I MEG3hi	SLC35F1
0	3.4003	0.295	0.019	0	Type I MEG3hi	NNMT
0	1.25064	0.362	0.089	0	Type I MEG3hi	AC245297.3
0	1.16256	0.375	0.102	0	Type I MEG3hi	ICE2
0	1.74064	0.342	0.071	0	Type I MEG3hi	IL12RB2
0	2.16523	0.308	0.037	0	Type I MEG3hi	MYL6B
0	1.43823	0.345	0.076	0	Type I MEG3hi	SETX
0	2.72313	0.298	0.03	0	Type I MEG3hi	BDNF-AS
0	1.3468	0.356	0.089	0	Type I MEG3hi	AC023509.6
0	1.82224	0.319	0.055	0	Type I MEG3hi	ADAMTS9
0	1.40771	0.332	0.068	0	Type I MEG3hi	PLCG2
0	1.16508	0.357	0.099	0	Type I MEG3hi	AC020687.1
0	2.79584	0.282	0.024	0	Type I MEG3hi	GALNT17
0	2.01652	0.3	0.043	0	Type I MEG3hi	PMP22
0	1.13299	0.355	0.098	0	Type I MEG3hi	TMEM164
0	1.9647	0.307	0.051	0	Type I MEG3hi	OTOGL
0	1.12931	0.351	0.096	0	Type I MEG3hi	MPV17
0	1.59964	0.313	0.058	0	Type I MEG3hi	SLC4A7
0	1.18033	0.338	0.083	0	Type I MEG3hi	UTRN
0	1.22708	0.347	0.094	0	Type I MEG3hi	AC008771.1
0	1.85673	0.299	0.048	0	Type I MEG3hi	GNG12-AS1
0	1.485	0.304	0.054	0	Type I MEG3hi	FAM13C
0	1.11675	0.334	0.084	0	Type I MEG3hi	ANKRD2
0	1.07102	0.349	0.101	0	Type I MEG3hi	PLIN5
0	2.71582	0.269	0.024	0	Type I MEG3hi	B4GALNT3
0	1.53214	0.301	0.057	0	Type I MEG3hi	CALD1
0	1.1368	0.337	0.094	0	Type I MEG3hi	AP005329.2
0	1.35843	0.308	0.068	0	Type I MEG3hi	SIRT2
0	1.54554	0.302	0.063	0	Type I MEG3hi	BCL2L14
0	1.025	0.315	0.079	0	Type I MEG3hi	TMEM245
0	1.51444	0.294	0.059	0	Type I MEG3hi	TMEM178B
0	1.46383	0.291	0.056	0	Type I MEG3hi	LINC01479
0	1.1477	0.316	0.081	0	Type I MEG3hi	MYLK3
0	1.25261	0.303	0.069	0	Type I MEG3hi	MROH7
0	3.08262	0.25	0.016	0	Type I MEG3hi	PALM2-AKAP2
0	2.4656	0.262	0.029	0	Type I MEG3hi	Z98949.3
0	1.90668	0.27	0.04	0	Type I MEG3hi	CYP2J2
0	11.7183	0.227	0	0	Type I MEG3hi	RTL1
0	1.13104	0.299	0.072	0	Type I MEG3hi	STRIT1
0	1.19065	0.297	0.07	0	Type I MEG3hi	ATP1B4
0	1.20458	0.295	0.069	0	Type I MEG3hi	AC117505.1
0	1.75219	0.274	0.049	0	Type I MEG3hi	CLSTN2
0	1.65856	0.268	0.045	0	Type I MEG3hi	SLC38A1
0	2.6517	0.244	0.022	0	Type I MEG3hi	ZNF556
0	1.32051	0.29	0.071	0	Type I MEG3hi	AP001831.1
0	1.87064	0.26	0.044	0	Type I MEG3hi	AC100803.4
0	2.39105	0.248	0.032	0	Type I MEG3hi	EOGT
0	1.49076	0.266	0.051	0	Type I MEG3hi	RETSAT
0	1.37388	0.273	0.058	0	Type I MEG3hi	C9orf147
0	1.90228	0.261	0.047	0	Type I MEG3hi	RERG
0	1.41829	0.273	0.06	0	Type I MEG3hi	AC053513.1
0	2.34394	0.238	0.025	0	Type I MEG3hi	ADAMTSL4
0	1.8045	0.25	0.045	0	Type I MEG3hi	AL360091.3
0	1.68758	0.241	0.036	0	Type I MEG3hi	PLPP3
0	4.18412	0.223	0.02	0	Type I MEG3hi	MYH3
0	2.29273	0.229	0.027	0	Type I MEG3hi	DNAJA4
0	1.52316	0.249	0.047	0	Type I MEG3hi	CLCN5
0	4.18326	0.207	0.008	0	Type I MEG3hi	NTN4
0	1.82183	0.235	0.037	0	Type I MEG3hi	AC009554.1
0	1.56216	0.231	0.037	0	Type I MEG3hi	ZNF608
0	1.79265	0.231	0.038	0	Type I MEG3hi	ACSS1
0	2.95642	0.209	0.019	0	Type I MEG3hi	DISC1
0	1.56412	0.237	0.047	0	Type I MEG3hi	PPP1R1C
0	3.04382	0.205	0.015	0	Type I MEG3hi	LINC00702
0	4.57433	0.19	0.005	0	Type I MEG3hi	AC245164.2
0	1.53381	0.23	0.046	0	Type I MEG3hi	HIF1A
0	3.6952	0.194	0.011	0	Type I MEG3hi	OTX2-AS1
0	1.87313	0.218	0.036	0	Type I MEG3hi	RUNX1
0	2.53061	0.201	0.02	0	Type I MEG3hi	AL591178.1
0	2.61894	0.197	0.019	0	Type I MEG3hi	A2ML1-AS1
0	2.89651	0.192	0.014	0	Type I MEG3hi	PPM1H
0	2.57859	0.193	0.016	0	Type I MEG3hi	TRIM38
0	1.83223	0.215	0.038	0	Type I MEG3hi	INSL6
0	1.89622	0.197	0.028	0	Type I MEG3hi	RIMKLB
0	2.49624	0.186	0.019	0	Type I MEG3hi	STARD13-AS
0	2.70221	0.187	0.023	0	Type I MEG3hi	CNKSR2
0	2.0019	0.185	0.025	0	Type I MEG3hi	KREMEN1
0	10.5656	0.159	0	0	Type I MEG3hi	AL117190.2
0	4.0042	0.164	0.006	0	Type I MEG3hi	CD44
0	2.0239	0.179	0.023	0	Type I MEG3hi	AL353593.2
0	1.97707	0.177	0.024	0	Type I MEG3hi	AL078459.1
0	14.8048	0.153	0	0	Type I MEG3hi	MEG9
0	1.85161	0.177	0.026	0	Type I MEG3hi	CD47
0	3.36721	0.158	0.008	0	Type I MEG3hi	AP000943.2
0	3.84206	0.152	0.007	0	Type I MEG3hi	LINC02240
0	3.14665	0.154	0.011	0	Type I MEG3hi	MAMDC2
0	3.43058	0.149	0.008	0	Type I MEG3hi	SESN3
0	2.40619	0.151	0.016	0	Type I MEG3hi	AP000787.1
0	2.61114	0.145	0.012	0	Type I MEG3hi	PRKD1
0	2.13005	0.146	0.016	0	Type I MEG3hi	KCNQ4
0	3.18466	0.135	0.006	0	Type I MEG3hi	CA3-AS1
0	3.6837	0.136	0.007	0	Type I MEG3hi	BDNF
0	3.10139	0.138	0.01	0	Type I MEG3hi	THSD4-AS1
0	2.90636	0.135	0.01	0	Type I MEG3hi	MAML2
0	3.10144	0.133	0.009	0	Type I MEG3hi	AL360178.2
0	3.45437	0.13	0.006	0	Type I MEG3hi	AC022146.2
0	3.38946	0.13	0.008	0	Type I MEG3hi	MAMDC2-AS1
0	4.1578	0.126	0.005	0	Type I MEG3hi	AL136171.2
0	3.73498	0.124	0.004	0	Type I MEG3hi	MYOF
0	3.01366	0.124	0.008	0	Type I MEG3hi	AL355474.1
0	4.41796	0.11	0.003	0	Type I MEG3hi	XG
0	3.52185	0.108	0.005	0	Type I MEG3hi	MUSK
0	3.95787	0.104	0.003	0	Type I MEG3hi	P2RY14
0	3.98143	0.098	0.003	0	Type I MEG3hi	HMGCS2
0	3.70639	0.095	0.003	0	Type I MEG3hi	MYLK
0	0.74977	0.977	0.892	0	Type I MEG3hi	TTN-AS1
2.1117e-307	2.3754	0.133	0.013	7.72902e-303	Type I MEG3hi	AL356805.1
9.87489e-307	1.27976	0.249	0.055	3.61431e-302	Type I MEG3hi	AP001011.1
4.03124e-306	2.38302	0.136	0.014	1.47547e-301	Type I MEG3hi	AL135936.1
4.16024e-306	3.50972	0.099	0.004	1.52269e-301	Type I MEG3hi	PLEKHA5
2.29723e-305	0.770701	0.571	0.225	8.40808e-301	Type I MEG3hi	BMPR1A
1.7516e-303	1.10199	0.311	0.083	6.41103e-299	Type I MEG3hi	NMRK2
3.9967e-303	0.84144	0.479	0.172	1.46283e-298	Type I MEG3hi	MAP2K6
1.86715e-300	0.89664	0.411	0.133	6.83395e-296	Type I MEG3hi	AC092440.1
2.4626e-300	0.724321	0.525	0.195	9.01336e-296	Type I MEG3hi	KALRN
1.08046e-299	0.724596	0.577	0.228	3.9546e-295	Type I MEG3hi	MBNL2
4.59643e-298	1.52519	0.232	0.049	1.68234e-293	Type I MEG3hi	AC007114.2
3.1425e-297	3.46756	0.099	0.005	1.15019e-292	Type I MEG3hi	AL021393.1
6.42198e-297	1.79413	0.202	0.038	2.35051e-292	Type I MEG3hi	PITPNC1
3.70231e-295	1.57413	0.179	0.029	1.35508e-290	Type I MEG3hi	ZBTB20-AS1
7.41677e-294	2.37823	0.14	0.016	2.71461e-289	Type I MEG3hi	PCA3
1.06868e-293	1.52999	0.196	0.035	3.91148e-289	Type I MEG3hi	LIMD1
2.19772e-293	0.900235	0.311	0.084	8.04388e-289	Type I MEG3hi	AL592429.2
1.49135e-291	1.9211	0.157	0.022	5.45849e-287	Type I MEG3hi	PAFAH2
3.86183e-291	1.04183	0.329	0.094	1.41347e-286	Type I MEG3hi	MGLL
5.77977e-289	0.892155	0.391	0.126	2.11545e-284	Type I MEG3hi	DDX60L
8.74289e-287	1.16975	0.258	0.061	3.19999e-282	Type I MEG3hi	CTNNA1
1.39403e-286	3.03663	0.091	0.004	5.10228e-282	Type I MEG3hi	NPNT
1.68266e-282	0.975403	0.328	0.096	6.15872e-278	Type I MEG3hi	FHL2
1.82436e-282	0.728743	0.412	0.136	6.67733e-278	Type I MEG3hi	ACSL1
2.44404e-282	1.5277	0.184	0.032	8.94544e-278	Type I MEG3hi	NBN
3.56417e-282	1.37015	0.208	0.042	1.30452e-277	Type I MEG3hi	PLEKHG3
1.32785e-281	1.76629	0.171	0.027	4.86005e-277	Type I MEG3hi	ZNF875
6.51515e-281	1.21415	0.247	0.058	2.38461e-276	Type I MEG3hi	AC015914.1
1.10234e-279	1.28046	0.209	0.042	4.03466e-275	Type I MEG3hi	FABP3
1.01832e-278	0.810802	0.445	0.156	3.72717e-274	Type I MEG3hi	SRSF10
3.68424e-277	2.35785	0.12	0.012	1.34847e-272	Type I MEG3hi	SDCBP
7.91858e-277	2.45097	0.127	0.014	2.89828e-272	Type I MEG3hi	PHYHIPL
7.98954e-277	1.88383	0.17	0.028	2.92425e-272	Type I MEG3hi	TMCO3
1.85422e-276	1.17829	0.308	0.09	6.78662e-272	Type I MEG3hi	ABLIM1
4.49425e-276	1.98645	0.136	0.016	1.64494e-271	Type I MEG3hi	WLS
1.01855e-275	0.769422	0.471	0.173	3.72798e-271	Type I MEG3hi	ERBIN
8.40614e-274	0.972493	0.3	0.084	3.07673e-269	Type I MEG3hi	APC
1.63689e-273	0.698219	0.397	0.132	5.99119e-269	Type I MEG3hi	ALPK2
3.99852e-273	1.38527	0.205	0.042	1.4635e-268	Type I MEG3hi	DENND6A-AS1
7.04041e-273	2.79287	0.1	0.006	2.57686e-268	Type I MEG3hi	FAT2
1.90957e-271	1.58998	0.197	0.039	6.98923e-267	Type I MEG3hi	WDR61
2.21888e-271	2.51973	0.125	0.014	8.12133e-267	Type I MEG3hi	FSTL1
8.9235e-270	0.648611	0.711	0.333	3.26609e-265	Type I MEG3hi	LPP
2.98816e-269	1.73372	0.166	0.027	1.0937e-264	Type I MEG3hi	EXOSC7
3.60618e-269	0.886984	0.232	0.053	1.3199e-264	Type I MEG3hi	NCAM1
5.96872e-269	0.340816	1	0.991	2.18461e-264	Type I MEG3hi	NEB
6.04297e-269	1.27746	0.201	0.04	2.21179e-264	Type I MEG3hi	ARL17B
1.16692e-268	0.739101	0.391	0.13	4.27104e-264	Type I MEG3hi	RASA1
2.12275e-268	1.63406	0.18	0.033	7.76948e-264	Type I MEG3hi	AQP7
1.24849e-267	0.796683	0.326	0.097	4.56961e-263	Type I MEG3hi	RBMS1
1.8604e-267	2.88595	0.107	0.009	6.80924e-263	Type I MEG3hi	KCNK2
2.16504e-267	1.19045	0.257	0.065	7.92427e-263	Type I MEG3hi	AC012085.2
3.32422e-267	2.52933	0.11	0.01	1.2167e-262	Type I MEG3hi	AC018697.1
1.56529e-266	1.76339	0.149	0.022	5.72913e-262	Type I MEG3hi	HDAC2
2.06766e-266	1.66834	0.157	0.024	7.56783e-262	Type I MEG3hi	GALNT18
9.69896e-266	1.66863	0.157	0.025	3.54992e-261	Type I MEG3hi	ATP2B4
4.17139e-264	1.03571	0.29	0.081	1.52677e-259	Type I MEG3hi	AC211433.1
2.7204e-263	1.93284	0.134	0.017	9.95695e-259	Type I MEG3hi	LINC01894
3.68483e-261	0.657975	0.588	0.247	1.34869e-256	Type I MEG3hi	USP13
6.19358e-260	1.04522	0.233	0.055	2.26691e-255	Type I MEG3hi	CBLB
8.32169e-260	1.28248	0.198	0.041	3.04582e-255	Type I MEG3hi	SH3PXD2A
4.56172e-259	2.93445	0.098	0.007	1.66963e-254	Type I MEG3hi	AL356356.1
9.24846e-259	1.10003	0.272	0.074	3.38503e-254	Type I MEG3hi	HIF1A-AS3
3.411e-258	1.02803	0.205	0.044	1.24846e-253	Type I MEG3hi	PRUNE2
2.26145e-257	2.85143	0.098	0.007	8.27715e-253	Type I MEG3hi	NHSL1
4.10281e-257	0.683006	0.439	0.159	1.50167e-252	Type I MEG3hi	ABCA1
4.37741e-256	1.49512	0.17	0.03	1.60218e-251	Type I MEG3hi	TGFBR3
5.55417e-255	0.963459	0.274	0.075	2.03288e-250	Type I MEG3hi	STARD13
3.11013e-254	2.95761	0.103	0.009	1.13834e-249	Type I MEG3hi	ADAMTS9-AS1
3.02235e-253	0.597335	0.974	0.832	1.10621e-248	Type I MEG3hi	EMC10
3.81018e-252	3.77094	0.08	0.003	1.39456e-247	Type I MEG3hi	CSGALNACT1
5.38751e-251	3.54142	0.084	0.004	1.97188e-246	Type I MEG3hi	AL137100.3
1.40702e-250	0.717588	0.496	0.198	5.14983e-246	Type I MEG3hi	TMEM38B
4.45025e-250	1.47616	0.187	0.038	1.62884e-245	Type I MEG3hi	SLC3A1
5.71265e-249	1.69662	0.148	0.023	2.09089e-244	Type I MEG3hi	PROX1
6.40139e-249	0.788516	0.533	0.226	2.34297e-244	Type I MEG3hi	GREB1L
1.68664e-248	0.633291	0.517	0.206	6.17327e-244	Type I MEG3hi	G3BP2
3.50235e-248	0.732725	0.401	0.141	1.28189e-243	Type I MEG3hi	MACF1
6.86179e-248	0.80044	0.383	0.132	2.51149e-243	Type I MEG3hi	ACADVL
1.98635e-246	2.10551	0.116	0.013	7.27025e-242	Type I MEG3hi	PKD2
9.70741e-246	1.46716	0.184	0.038	3.55301e-241	Type I MEG3hi	MYH6
2.09277e-245	0.968044	0.27	0.076	7.65973e-241	Type I MEG3hi	MYL12A
8.87645e-245	2.82744	0.093	0.007	3.24887e-240	Type I MEG3hi	PRICKLE2
2.41594e-244	1.90428	0.132	0.018	8.84258e-240	Type I MEG3hi	PITPNM2
2.77552e-243	1.84877	0.145	0.023	1.01587e-238	Type I MEG3hi	IL3RA
3.75891e-243	0.60197	0.569	0.241	1.3758e-238	Type I MEG3hi	MAGI1
8.57705e-243	1.01503	0.285	0.084	3.13928e-238	Type I MEG3hi	AC073167.1
1.50665e-242	0.612694	0.622	0.277	5.51448e-238	Type I MEG3hi	PCNT
1.90183e-242	1.10044	0.214	0.05	6.96091e-238	Type I MEG3hi	GABPB2
2.14989e-240	0.459737	0.525	0.209	7.86883e-236	Type I MEG3hi	KANSL1
3.50257e-240	1.10314	0.24	0.062	1.28198e-235	Type I MEG3hi	A2M
3.61444e-240	0.664596	0.484	0.191	1.32292e-235	Type I MEG3hi	FNDC3B
1.15383e-239	2.87042	0.087	0.006	4.22312e-235	Type I MEG3hi	MED12L
4.55094e-239	2.90357	0.085	0.005	1.66569e-234	Type I MEG3hi	C14orf132
3.22262e-238	1.19404	0.218	0.053	1.17951e-233	Type I MEG3hi	EXOG
5.24343e-238	1.89254	0.132	0.019	1.91915e-233	Type I MEG3hi	SLC39A10
6.68386e-238	2.62527	0.087	0.006	2.44636e-233	Type I MEG3hi	DOCK1
2.36751e-237	0.549884	0.821	0.462	8.66531e-233	Type I MEG3hi	NRAP
4.65024e-237	0.942932	0.25	0.068	1.70203e-232	Type I MEG3hi	RASAL2
6.30361e-237	4.35295	0.067	0.001	2.30718e-232	Type I MEG3hi	ATP10D
1.16299e-236	1.36066	0.173	0.034	4.25666e-232	Type I MEG3hi	AMOT
4.38929e-236	0.463564	0.51	0.205	1.60652e-231	Type I MEG3hi	TNNC1
2.35222e-233	1.34235	0.171	0.034	8.60935e-229	Type I MEG3hi	Z98949.1
1.38143e-232	1.18905	0.19	0.042	5.05617e-228	Type I MEG3hi	CNNM4
5.02276e-232	1.38298	0.185	0.04	1.83838e-227	Type I MEG3hi	ADARB1
6.89078e-232	1.61127	0.166	0.032	2.52209e-227	Type I MEG3hi	IFT43
4.44705e-231	1.83283	0.135	0.021	1.62767e-226	Type I MEG3hi	AC104316.1
4.71166e-231	1.47145	0.164	0.032	1.72452e-226	Type I MEG3hi	CPVL
2.53691e-230	0.706167	0.474	0.193	9.28533e-226	Type I MEG3hi	DLEU1
4.71652e-230	1.03024	0.237	0.063	1.72629e-225	Type I MEG3hi	CFL2
2.83991e-229	1.82755	0.144	0.024	1.03943e-224	Type I MEG3hi	EFCAB13
3.22023e-229	1.36577	0.184	0.04	1.17863e-224	Type I MEG3hi	NIPSNAP3B
5.94776e-229	1.08478	0.222	0.057	2.17694e-224	Type I MEG3hi	TNS3
1.99704e-228	1.11717	0.194	0.044	7.30935e-224	Type I MEG3hi	ZBTB38
3.1274e-228	0.562338	0.873	0.538	1.14466e-223	Type I MEG3hi	QKI
6.47855e-228	1.35135	0.16	0.03	2.37121e-223	Type I MEG3hi	FAM177A1
1.5417e-227	1.92897	0.114	0.014	5.64279e-223	Type I MEG3hi	AC063960.1
4.55296e-226	1.06923	0.233	0.062	1.66643e-221	Type I MEG3hi	RPS6KA5
1.91432e-225	1.02425	0.206	0.05	7.00661e-221	Type I MEG3hi	CPT1B
4.27983e-225	0.532569	0.499	0.203	1.56646e-220	Type I MEG3hi	SPTB
5.48106e-225	0.625243	0.39	0.142	2.00612e-220	Type I MEG3hi	PRRX1
7.28764e-225	1.05449	0.207	0.05	2.66735e-220	Type I MEG3hi	ME2
1.49871e-224	1.31475	0.154	0.029	5.48544e-220	Type I MEG3hi	LSMEM2
5.56059e-224	0.829064	0.265	0.077	2.03523e-219	Type I MEG3hi	EEFSEC
8.10376e-223	0.550545	0.613	0.276	2.96606e-218	Type I MEG3hi	REV3L
4.13941e-222	0.394321	0.424	0.156	1.51507e-217	Type I MEG3hi	UTY
5.33034e-222	0.809436	0.346	0.121	1.95096e-217	Type I MEG3hi	AC068282.1
1.21695e-221	2.00046	0.124	0.018	4.45415e-217	Type I MEG3hi	C4orf19
7.36486e-221	2.39096	0.096	0.009	2.69561e-216	Type I MEG3hi	BICRA-AS1
5.19903e-220	0.599391	0.399	0.148	1.9029e-215	Type I MEG3hi	CCSER2
4.94378e-218	0.520684	0.695	0.339	1.80947e-213	Type I MEG3hi	MAST2
2.0377e-217	0.590722	0.371	0.132	7.4582e-213	Type I MEG3hi	USP24
5.18806e-217	0.490153	0.734	0.371	1.89888e-212	Type I MEG3hi	TEAD1
1.3226e-216	2.03734	0.103	0.012	4.84085e-212	Type I MEG3hi	ATP1A1
5.08154e-216	0.642079	0.757	0.425	1.85989e-211	Type I MEG3hi	LRRTM3
1.64817e-215	0.787922	0.25	0.072	6.03245e-211	Type I MEG3hi	EMG1
2.62283e-215	1.53632	0.16	0.032	9.59983e-211	Type I MEG3hi	COL21A1
7.89544e-215	0.724339	0.38	0.145	2.88981e-210	Type I MEG3hi	RYR3
2.1451e-214	0.902798	0.257	0.076	7.85128e-210	Type I MEG3hi	RNF169
4.01567e-214	1.55924	0.138	0.024	1.46978e-209	Type I MEG3hi	AL161430.1
6.11333e-214	0.64139	0.334	0.115	2.23754e-209	Type I MEG3hi	LYPLAL1
1.52859e-213	0.735437	0.335	0.117	5.59478e-209	Type I MEG3hi	SLC1A3
1.85425e-213	1.79682	0.122	0.018	6.78673e-209	Type I MEG3hi	ATP9A
7.87153e-213	1.35785	0.161	0.033	2.88106e-208	Type I MEG3hi	IL17D
1.7167e-212	0.63519	0.287	0.09	6.2833e-208	Type I MEG3hi	ZNF462
5.53556e-212	1.13906	0.199	0.049	2.02607e-207	Type I MEG3hi	AL356113.1
1.33506e-210	0.508741	0.62	0.288	4.88645e-206	Type I MEG3hi	ZNF106
2.56711e-210	3.07232	0.082	0.006	9.39586e-206	Type I MEG3hi	CCDC63
1.46245e-209	0.5923	0.603	0.284	5.35272e-205	Type I MEG3hi	MAP3K20
6.6384e-209	2.51925	0.091	0.009	2.42972e-204	Type I MEG3hi	MAPK4
6.63983e-208	0.894306	0.233	0.066	2.43024e-203	Type I MEG3hi	RIPOR2
1.83096e-207	0.943525	0.213	0.056	6.70151e-203	Type I MEG3hi	HDDC2
3.69581e-207	2.04152	0.112	0.016	1.3527e-202	Type I MEG3hi	ATP1B3
1.22026e-206	0.961101	0.204	0.052	4.46627e-202	Type I MEG3hi	MAP4K4
2.65666e-206	1.2247	0.186	0.045	9.72364e-202	Type I MEG3hi	GCSH
4.17226e-206	0.584846	0.366	0.134	1.52709e-201	Type I MEG3hi	GSK3B
6.73012e-206	0.74003	0.325	0.114	2.46329e-201	Type I MEG3hi	OARD1
9.03561e-206	1.65457	0.115	0.017	3.30712e-201	Type I MEG3hi	VGLL2
1.74396e-205	2.22762	0.088	0.008	6.38305e-201	Type I MEG3hi	JAM3
2.33913e-205	1.20842	0.159	0.033	8.56146e-201	Type I MEG3hi	SRGAP3
4.54208e-205	2.27867	0.091	0.009	1.66245e-200	Type I MEG3hi	NUAK1
5.19671e-205	1.28066	0.158	0.033	1.90205e-200	Type I MEG3hi	KCNB1
5.21487e-205	1.2955	0.163	0.035	1.90869e-200	Type I MEG3hi	TGFB2
2.63531e-204	1.63479	0.13	0.022	9.64549e-200	Type I MEG3hi	TMPRSS9
3.18739e-203	0.503334	0.445	0.179	1.16661e-198	Type I MEG3hi	ROCK2
2.72644e-202	1.93239	0.105	0.014	9.97905e-198	Type I MEG3hi	AC002546.1
3.2574e-202	0.542574	0.441	0.182	1.19224e-197	Type I MEG3hi	BICC1
4.05437e-202	1.34253	0.14	0.026	1.48394e-197	Type I MEG3hi	SFRP4
7.00773e-202	1.42636	0.169	0.038	2.5649e-197	Type I MEG3hi	AC008957.2
1.00716e-201	0.533053	0.361	0.132	3.6863e-197	Type I MEG3hi	ATP2C1
3.79924e-201	0.514336	0.512	0.221	1.39056e-196	Type I MEG3hi	FNIP1
1.4982e-200	1.56735	0.127	0.021	5.48356e-196	Type I MEG3hi	MMP2
1.99752e-200	0.404154	0.75	0.399	7.31113e-196	Type I MEG3hi	ASB5
2.83274e-200	0.626202	0.288	0.094	1.03681e-195	Type I MEG3hi	RUSC2
6.17005e-200	0.699283	0.319	0.112	2.2583e-195	Type I MEG3hi	TSPAN7
9.20876e-200	1.39698	0.162	0.036	3.3705e-195	Type I MEG3hi	AC023424.3
4.82418e-199	0.471317	0.736	0.381	1.7657e-194	Type I MEG3hi	SGCG
6.94567e-199	0.510995	0.428	0.172	2.54219e-194	Type I MEG3hi	TRIO
2.39215e-198	2.99912	0.074	0.005	8.7555e-194	Type I MEG3hi	DOCK6
4.17149e-197	0.577093	0.336	0.121	1.52681e-192	Type I MEG3hi	PEAK1
5.5201e-197	2.8616	0.068	0.004	2.02041e-192	Type I MEG3hi	CDK6
7.72794e-197	0.892501	0.206	0.055	2.8285e-192	Type I MEG3hi	MLYCD
9.52899e-196	2.79645	0.079	0.007	3.48771e-191	Type I MEG3hi	AP001021.3
9.71744e-196	0.803506	0.237	0.07	3.55668e-191	Type I MEG3hi	ENPEP
1.02329e-195	1.11559	0.165	0.037	3.74535e-191	Type I MEG3hi	AL592430.1
1.3924e-195	1.11118	0.184	0.046	5.09633e-191	Type I MEG3hi	DDAH1
2.08975e-195	2.03938	0.103	0.014	7.64871e-191	Type I MEG3hi	GK-AS1
4.34923e-195	1.00201	0.216	0.061	1.59186e-190	Type I MEG3hi	AC104365.1
6.02644e-195	0.667202	0.274	0.089	2.20574e-190	Type I MEG3hi	IFRD1
2.05877e-194	3.12484	0.071	0.005	7.53531e-190	Type I MEG3hi	AP000331.1
2.30541e-194	2.26565	0.091	0.01	8.43802e-190	Type I MEG3hi	LDHB
2.34845e-194	0.681909	0.309	0.109	8.59557e-190	Type I MEG3hi	SMPX
7.09669e-194	0.599972	0.345	0.127	2.59746e-189	Type I MEG3hi	XRRA1
1.27929e-193	0.751791	0.245	0.075	4.68234e-189	Type I MEG3hi	CDK5RAP2
1.55021e-193	0.426637	0.649	0.314	5.67394e-189	Type I MEG3hi	EXOC6
1.95917e-193	0.511199	0.434	0.177	7.17074e-189	Type I MEG3hi	LMO7
[truncated: 5,144 more rows]

## Sheet: e. Fibroblasts
Seurat FindAllMarkers signficant marker genes distinguishing Fibroblast subpopulations
p_val	avg_log2FC	% of Subpopulation	% of all other Fibroblasts	p_val_adj	Subpopulation	gene
1.29e-103	0.589518	0.662	0.545	4.74e-99	FB_0	COL15A1
2.79e-76	0.445562	0.768	0.69	1.02e-71	FB_0	ABCA10
1.78e-45	0.582725	0.507	0.45	6.53e-41	FB_0	SMOC2
2.38e-27	0.375172	0.599	0.596	8.72e-23	FB_0	TCF4
1.23e-25	0.480879	0.44	0.415	4.49e-21	FB_0	HMCN2
8.32e-23	0.284173	0.684	0.679	3.04e-18	FB_0	ABCA8
7.37e-16	0.350589	0.523	0.523	2.7e-11	FB_0	ABCA9
4.48e-14	0.494675	0.277	0.248	1.64e-09	FB_0	ITIH5
3.47e-13	0.591722	0.246	0.217	1.27e-08	FB_0	CALCRL
7.66e-09	0.539232	0.214	0.193	0.000280312	FB_0	COLGALT2
2.25e-08	0.269116	0.553	0.575	0.000824496	FB_0	PLAGL1
3.58e-08	0.277891	0.42	0.428	0.00131089	FB_0	HSPG2
1.11e-07	0.518466	0.181	0.16	0.00405347	FB_0	PLCG2
1.66e-07	0.374298	0.368	0.37	0.00606313	FB_0	PDZRN3
1.18e-06	0.250662	0.475	0.491	0.0432154	FB_0	PRICKLE1
6.39e-06	0.446333	0.162	0.143	0.233974	FB_0	ITGA8
0.00130673	0.366462	0.114	0.103	1	FB_0	FMO2
0.000305262	0.471086	0.18	0.17	1	FB_0	NRK
0.00312697	0.386833	0.187	0.181	1	FB_0	PLCB4
0.000101792	0.446798	0.196	0.186	1	FB_0	PTPRD
0.000909838	0.395298	0.199	0.195	1	FB_0	RHOJ
0.00216999	0.393481	0.223	0.224	1	FB_0	LSP1
0.000124538	0.446125	0.232	0.228	1	FB_0	ANGPTL1
0.00144829	0.310757	0.283	0.28	1	FB_0	IL1RAPL1
0.00897311	0.302661	0.359	0.39	1	FB_0	SON
0.00067313	0.329532	0.408	0.445	1	FB_0	AHI1
0.000830316	0.257159	0.44	0.484	1	FB_0	MEG3
0.000165967	0.257095	0.49	0.54	1	FB_0	SPTBN1
0	1.09519	0.4	0.125	0	FB_1	COL6A6
0	1.04384	0.394	0.128	0	FB_1	NRK
0	1.11892	0.529	0.199	0	FB_1	LRP1B
0	1.04799	0.58	0.221	0	FB_1	IL1RAPL1
0	0.892317	0.654	0.276	0	FB_1	SCN7A
0	0.768604	0.727	0.352	0	FB_1	LRRTM4
7.07e-300	0.870478	0.4	0.139	2.59e-295	FB_1	PLCB4
2.69e-299	1.01716	0.702	0.383	9.86e-295	FB_1	AL590807.1
8.17e-298	0.734111	0.834	0.499	2.99e-293	FB_1	ARHGAP24
7.2e-291	0.8049	0.711	0.374	2.64e-286	FB_1	AC007319.1
2.57e-290	1.00131	0.308	0.093	9.4e-286	FB_1	PLD5
4.85e-288	0.950453	0.293	0.085	1.77e-283	FB_1	CSRNP3
5.47e-285	0.900218	0.46	0.183	2e-280	FB_1	AL138828.1
1.22e-284	0.72522	0.496	0.202	4.47e-280	FB_1	TMTC2
7.62e-281	0.626043	0.859	0.508	2.79e-276	FB_1	COL15A1
2.42e-279	0.839618	0.606	0.288	8.88e-275	FB_1	ABCA9-AS1
8.73e-273	0.667005	0.869	0.562	3.2e-268	FB_1	PRKG1
2.49e-272	0.892028	0.192	0.04	9.11e-268	FB_1	ADRA1A
1.24e-267	0.751329	0.641	0.317	4.54e-263	FB_1	PDZRN3
5.49e-266	0.777736	0.505	0.215	2.01e-261	FB_1	ADAMTS12
4.74e-264	0.924732	0.29	0.088	1.74e-259	FB_1	LINC01515
2.16e-263	0.835352	0.344	0.117	7.89e-259	FB_1	CYP7B1
2.43e-251	0.81617	0.269	0.08	8.88e-247	FB_1	ZC2HC1B
4.48e-249	0.712481	0.479	0.202	1.64e-244	FB_1	MME
1.53e-248	0.854161	0.181	0.039	5.6e-244	FB_1	LINC02207
8.97e-237	0.818505	0.308	0.104	3.28e-232	FB_1	ALDH1A2
1.09e-236	0.808204	0.267	0.083	3.98e-232	FB_1	GUCY1A1
1.12e-233	0.747753	0.579	0.288	4.09e-229	FB_1	NCAM2
1.62e-228	0.698039	0.325	0.115	5.93e-224	FB_1	ENOX1
2.15e-219	0.71009	0.428	0.182	7.85e-215	FB_1	CALCRL
1.23e-218	0.857136	0.32	0.118	4.52e-214	FB_1	FGF13
3.09e-214	0.658668	0.466	0.206	1.13e-209	FB_1	PREX2
3.63e-214	0.652192	0.526	0.25	1.33e-209	FB_1	PDE4D
8.27e-208	0.736939	0.58	0.309	3.03e-203	FB_1	LINC02511
1.37e-205	0.67624	0.312	0.114	5.01e-201	FB_1	ITGA8
2.18e-190	0.650088	0.343	0.138	7.99e-186	FB_1	STARD4-AS1
1.8e-188	0.784553	0.237	0.079	6.58e-184	FB_1	AC015923.1
2.76e-185	0.599145	0.498	0.241	1.01e-180	FB_1	AC012404.1
3.39e-185	0.612356	0.424	0.19	1.24e-180	FB_1	HMGCLL1
3.83e-184	0.517135	0.617	0.326	1.4e-179	FB_1	FAP
2.76e-183	0.584525	0.377	0.16	1.01e-178	FB_1	RHOJ
1.71e-179	0.62221	0.24	0.081	6.27e-175	FB_1	LINC01579
1.81e-179	0.722322	0.341	0.142	6.64e-175	FB_1	BX284613.2
7.87e-179	0.53298	0.81	0.524	2.88e-174	FB_1	PLAGL1
3.71e-178	0.86545	0.186	0.055	1.36e-173	FB_1	KCNMB2-AS1
6.61e-176	0.512129	0.825	0.551	2.42e-171	FB_1	TCF4
1.19e-172	0.524428	0.586	0.311	4.35e-168	FB_1	BMPER
1.88e-172	0.570774	0.494	0.246	6.87e-168	FB_1	LINC00882
3.29e-172	0.652312	0.168	0.046	1.2e-167	FB_1	MME-AS1
3.41e-172	0.6383	0.192	0.058	1.25e-167	FB_1	FAM198B-AS1
5.2e-171	0.691194	0.237	0.083	1.91e-166	FB_1	LRRC7
1.13e-170	0.675377	0.388	0.177	4.15e-166	FB_1	AL365295.1
3.25e-169	0.618642	0.407	0.188	1.19e-164	FB_1	ITGBL1
7e-167	0.672968	0.275	0.106	2.56e-162	FB_1	AL356124.1
2.33e-166	0.634606	0.257	0.095	8.54e-162	FB_1	APBA1
5.24e-166	0.683806	0.318	0.134	1.92e-161	FB_1	PCDH7
4.79e-165	0.644698	0.318	0.132	1.75e-160	FB_1	LINC02456
1.91e-163	0.383133	0.981	0.865	6.99e-159	FB_1	RORA
2.21e-163	0.52524	0.624	0.348	8.09e-159	FB_1	SLC9A9
4.37e-162	0.545871	0.368	0.163	1.6e-157	FB_1	COLGALT2
2.56e-159	0.888505	0.16	0.046	9.38e-155	FB_1	MROH9
1.91e-158	0.497172	0.489	0.245	7e-154	FB_1	PDE1A
2.39e-157	0.263012	0.956	0.734	8.73e-153	FB_1	LAMA2
2.39e-156	0.481644	0.455	0.222	8.73e-152	FB_1	TENM4
6.31e-156	0.549186	0.428	0.207	2.31e-151	FB_1	ZBTB20-AS5
2.32e-155	0.404848	0.918	0.661	8.48e-151	FB_1	ABCA10
4.55e-154	0.682999	0.122	0.028	1.67e-149	FB_1	VLDLR-AS1
7.77e-154	0.468193	0.484	0.242	2.85e-149	FB_1	LAMB1
7.53e-152	0.561074	0.327	0.142	2.76e-147	FB_1	IL7
5.38e-151	0.48583	0.614	0.347	1.97e-146	FB_1	PDE7B
1.6e-149	0.661541	0.196	0.066	5.84e-145	FB_1	AL360178.1
3.02e-148	0.569942	0.151	0.042	1.11e-143	FB_1	CAPN6
1.38e-147	0.490633	0.504	0.262	5.05e-143	FB_1	PLD1
1.69e-147	0.616935	0.22	0.08	6.17e-143	FB_1	KLHL13
3e-147	0.400931	0.697	0.414	1.1e-142	FB_1	SMOC2
3.59e-147	0.473011	0.521	0.276	1.31e-142	FB_1	COLEC12
7.89e-147	0.901518	0.186	0.063	2.89e-142	FB_1	KCNIP4
1.12e-146	0.950601	0.131	0.034	4.1e-142	FB_1	CDH18
6.77e-145	0.602589	0.196	0.067	2.48e-140	FB_1	RNF150
2.27e-142	0.652878	0.183	0.061	8.29e-138	FB_1	KCNMB2
8.02e-142	0.470443	0.302	0.129	2.94e-137	FB_1	COL21A1
1.05e-141	0.582477	0.443	0.229	3.83e-137	FB_1	GULP1
1.97e-141	0.569501	0.347	0.16	7.22e-137	FB_1	ADGRL2
4.21e-141	0.601316	0.301	0.132	1.54e-136	FB_1	MMP16
3.11e-140	0.427181	0.521	0.277	1.14e-135	FB_1	LIMCH1
8.04e-140	0.532677	0.336	0.153	2.94e-135	FB_1	RORA-AS1
1.11e-137	0.544019	0.416	0.21	4.05e-133	FB_1	EDA
4.77e-135	0.361101	0.627	0.363	1.75e-130	FB_1	PDE5A
7.95e-133	0.438396	0.6	0.342	2.91e-128	FB_1	SGCD
1.56e-132	0.481998	0.265	0.109	5.72e-128	FB_1	MOB3B
5.81e-132	0.388304	0.435	0.217	2.13e-127	FB_1	ITIH5
1.63e-131	0.586857	0.317	0.146	5.98e-127	FB_1	LINC01091
2.22e-131	0.56175	0.204	0.076	8.11e-127	FB_1	LINC00710
3.59e-131	0.607072	0.274	0.119	1.31e-126	FB_1	SHOC1
4.98e-131	0.557573	0.364	0.179	1.82e-126	FB_1	FHIT
4.01e-130	0.380534	0.817	0.545	1.47e-125	FB_1	PLXDC2
5.91e-129	0.528908	0.44	0.232	2.16e-124	FB_1	ZFPM2-AS1
2.71e-128	0.481921	0.416	0.212	9.92e-124	FB_1	FRMD6
1.43e-127	0.781405	0.103	0.025	5.23e-123	FB_1	AC092691.1
2.1e-127	0.435342	0.387	0.19	7.69e-123	FB_1	TANC2
9.71e-126	0.595384	0.227	0.092	3.55e-121	FB_1	SOX6
1.98e-125	0.401897	0.28	0.121	7.24e-121	FB_1	RALGPS2
3.58e-125	0.497079	0.472	0.257	1.31e-120	FB_1	BMP5
4.52e-124	0.377517	0.476	0.252	1.65e-119	FB_1	IGF1
1.67e-121	0.464998	0.333	0.159	6.1e-117	FB_1	PTPRD
5.25e-121	0.545643	0.177	0.063	1.92e-116	FB_1	ADCY1
1.47e-120	0.522956	0.241	0.101	5.38e-116	FB_1	GLRX
2.43e-120	0.516461	0.612	0.377	8.88e-116	FB_1	LINC00486
2.55e-119	0.508924	0.268	0.119	9.35e-115	FB_1	ZRANB2-AS2
2.81e-119	0.494773	0.231	0.095	1.03e-114	FB_1	SEMA5A
4.77e-119	0.463767	0.187	0.069	1.75e-114	FB_1	ADAM19
6.32e-119	0.396465	0.738	0.48	2.31e-114	FB_1	ABCA9
3.92e-118	0.413432	0.501	0.279	1.43e-113	FB_1	ARL15
9.43e-118	0.360165	0.512	0.282	3.45e-113	FB_1	NIBAN1
6.71e-116	0.547465	0.192	0.074	2.46e-111	FB_1	AP002026.1
1.52e-114	0.514754	0.144	0.047	5.57e-110	FB_1	BCHE
3.49e-114	0.372653	0.669	0.411	1.28e-109	FB_1	NR3C1
5.2e-114	0.432186	0.224	0.092	1.9e-109	FB_1	ARHGAP18
4.22e-113	0.6648	0.196	0.078	1.54e-108	FB_1	LINGO2
4.32e-113	0.527479	0.137	0.044	1.58e-108	FB_1	Z99289.1
6.04e-113	0.567573	0.154	0.053	2.21e-108	FB_1	C12orf40
8.29e-113	0.441227	0.291	0.135	3.03e-108	FB_1	AC010894.3
2.93e-112	0.344761	0.389	0.197	1.07e-107	FB_1	ANGPTL1
3.01e-112	0.437196	0.312	0.149	1.1e-107	FB_1	SLC2A13
4.91e-112	0.555916	0.12	0.036	1.8e-107	FB_1	LINC01090
4.63e-111	0.395278	0.455	0.245	1.69e-106	FB_1	SASH1
6.95e-111	0.536697	0.135	0.043	2.54e-106	FB_1	NMNAT3
1.4e-110	0.403831	0.273	0.124	5.12e-106	FB_1	CSGALNACT1
4.03e-110	0.602769	0.148	0.051	1.47e-105	FB_1	ADGRL3
3.06e-109	0.380198	0.303	0.143	1.12e-104	FB_1	RNF144A
5.31e-108	0.507038	0.119	0.036	1.94e-103	FB_1	LINC01322
8.01e-107	0.396239	0.198	0.079	2.93e-102	FB_1	DOCK10
1.13e-106	0.397446	0.307	0.148	4.15e-102	FB_1	ANGPT1
4.93e-106	0.420323	0.245	0.109	1.81e-101	FB_1	NTN4
3.85e-105	0.347382	0.323	0.157	1.41e-100	FB_1	PDZD2
7.46e-105	0.539507	0.198	0.081	2.73e-100	FB_1	CNTN1
1.16e-104	0.31454	0.527	0.301	4.24e-100	FB_1	ROBO1
1.55e-104	0.388316	0.282	0.132	5.67e-100	FB_1	FOCAD
2.88e-104	0.378526	0.365	0.188	1.05e-99	FB_1	NLGN4Y
4.71e-103	0.325751	0.471	0.261	1.72e-98	FB_1	FREM1
1.45e-102	0.505687	0.188	0.076	5.32e-98	FB_1	AC093879.1
7.2e-102	0.460669	0.121	0.038	2.64e-97	FB_1	ZBTB20-AS1
9.31e-102	0.483131	0.153	0.056	3.41e-97	FB_1	AC117834.1
1.06e-101	0.482802	0.177	0.069	3.87e-97	FB_1	CNTNAP4
2.12e-101	0.394231	0.543	0.336	7.75e-97	FB_1	RAD51B
4.28e-101	0.329656	0.343	0.175	1.57e-96	FB_1	EPHA3
4.9e-101	0.419806	0.29	0.14	1.79e-96	FB_1	DPYD-AS1
6.05e-100	0.355227	0.53	0.309	2.21e-95	FB_1	PBX1
3.69e-99	0.356564	0.39	0.209	1.35e-94	FB_1	AL445250.1
6.69e-99	0.352377	0.397	0.212	2.45e-94	FB_1	SPATA6
1.27e-98	0.293022	0.425	0.231	4.65e-94	FB_1	TMTC1
2.09e-98	0.372982	0.311	0.155	7.67e-94	FB_1	SGCE
5.29e-98	0.410308	0.277	0.133	1.94e-93	FB_1	NCKAP5
1.36e-97	0.437942	0.155	0.058	4.97e-93	FB_1	AC046134.2
1.37e-97	0.419482	0.247	0.114	5.01e-93	FB_1	CCDC7
2.15e-97	0.35637	0.364	0.191	7.85e-93	FB_1	DANT2
4.39e-97	0.455805	0.116	0.037	1.61e-92	FB_1	FMO1
5.19e-97	0.369405	0.294	0.144	1.9e-92	FB_1	NBEA
1.01e-96	0.384155	0.273	0.132	3.71e-92	FB_1	NCALD
1.36e-96	0.362697	0.768	0.525	4.97e-92	FB_1	RUNX1T1
7.49e-94	0.525897	0.152	0.058	2.74e-89	FB_1	RHD
4e-93	0.485505	0.189	0.08	1.47e-88	FB_1	MUSK
7.81e-93	0.288131	0.765	0.503	2.86e-88	FB_1	ABCA6
1.78e-92	0.330043	0.358	0.189	6.53e-88	FB_1	RHOBTB3
2e-92	0.305806	0.487	0.277	7.31e-88	FB_1	KANSL1
3.05e-92	0.300015	0.303	0.151	1.11e-87	FB_1	FAM110B
6.01e-92	0.470092	0.253	0.123	2.2e-87	FB_1	AL357873.1
1.04e-91	0.329326	0.485	0.28	3.82e-87	FB_1	FAM13A
2.01e-91	0.315926	0.496	0.288	7.34e-87	FB_1	TFPI
2.06e-91	0.406496	0.143	0.053	7.54e-87	FB_1	AC093110.1
2.14e-91	0.261123	0.887	0.64	7.82e-87	FB_1	ABCA8
8.16e-91	0.412818	0.175	0.072	2.99e-86	FB_1	FAM13C
8.42e-91	0.459897	0.139	0.051	3.08e-86	FB_1	TCF4-AS1
1.02e-90	0.453525	0.125	0.043	3.75e-86	FB_1	AL355835.1
1.18e-90	0.299547	0.286	0.141	4.32e-86	FB_1	NREP
2.6e-90	0.31502	0.499	0.29	9.53e-86	FB_1	GLI3
2.46e-89	0.288889	0.552	0.33	9e-85	FB_1	CACNA2D1
2.7e-88	0.462155	0.139	0.052	9.9e-84	FB_1	STARD13-AS
4.72e-88	0.296983	0.389	0.215	1.73e-83	FB_1	TENM1
5.48e-88	0.491651	0.18	0.077	2.01e-83	FB_1	AC090578.1
1.79e-87	0.341658	0.21	0.095	6.55e-83	FB_1	JARID2
2.62e-87	0.277672	0.709	0.465	9.58e-83	FB_1	COL5A2
6.01e-87	0.359498	0.257	0.125	2.2e-82	FB_1	LINC00377
1.57e-86	0.288684	0.249	0.119	5.75e-82	FB_1	DOCK5
1.72e-86	0.430796	0.206	0.093	6.31e-82	FB_1	LINC01482
4.18e-86	0.29667	0.571	0.356	1.53e-81	FB_1	DMD
1.29e-84	0.34041	0.203	0.091	4.72e-80	FB_1	ADGRA3
6.28e-84	0.35914	0.226	0.107	2.3e-79	FB_1	SGIP1
2.23e-83	0.387863	0.169	0.071	8.16e-79	FB_1	AC053513.1
2.33e-83	0.536078	0.204	0.095	8.53e-79	FB_1	LSAMP
3.86e-83	0.285977	0.299	0.154	1.41e-78	FB_1	BACH2
1.08e-82	0.346292	0.257	0.128	3.95e-78	FB_1	AC012409.2
1.52e-82	0.353571	0.217	0.102	5.57e-78	FB_1	RUNX2
1.57e-82	0.370285	0.215	0.1	5.76e-78	FB_1	MLLT3
2.7e-82	0.27307	0.616	0.389	9.9e-78	FB_1	PLEKHA5
8.08e-82	0.294224	0.297	0.154	2.96e-77	FB_1	PPP2R3A
5.17e-81	0.285995	0.195	0.087	1.89e-76	FB_1	FMO2
1.25e-80	0.358758	0.188	0.084	4.59e-76	FB_1	AC008771.1
4.29e-80	0.436493	0.108	0.037	1.57e-75	FB_1	KCNS3
8.48e-80	0.251328	0.61	0.389	3.1e-75	FB_1	MEG8
1.06e-79	0.265483	0.546	0.333	3.88e-75	FB_1	FOXN3
1.54e-79	0.321606	0.176	0.077	5.65e-75	FB_1	ARL17B
2.12e-79	0.371598	0.201	0.093	7.76e-75	FB_1	AL365214.2
4.11e-79	0.371434	0.148	0.06	1.5e-74	FB_1	ENPP2
1.19e-78	0.296602	0.277	0.144	4.35e-74	FB_1	PDE3A
1.74e-78	0.321527	0.264	0.135	6.36e-74	FB_1	GAREM1
5.59e-77	0.269947	0.288	0.15	2.05e-72	FB_1	NECTIN3
9.21e-77	0.273273	0.318	0.171	3.37e-72	FB_1	PDS5B
4.43e-76	0.300769	0.247	0.124	1.62e-71	FB_1	AC005550.2
4.94e-76	0.355143	0.138	0.055	1.81e-71	FB_1	SMAD1
1.2e-75	0.325782	0.121	0.045	4.38e-71	FB_1	ALPK3
2.1e-75	0.289273	0.348	0.195	7.67e-71	FB_1	LINC01473
2.19e-75	0.300693	0.24	0.119	8.01e-71	FB_1	ALDH1A1
2.77e-75	0.251877	0.291	0.154	1.01e-70	FB_1	RECK
5.74e-75	0.366814	0.114	0.041	2.1e-70	FB_1	GUCY1B1
8.05e-75	0.378168	0.111	0.04	2.95e-70	FB_1	AC012459.1
1.43e-74	0.390348	0.158	0.068	5.25e-70	FB_1	ADAMTS17
2.36e-74	0.410028	0.135	0.054	8.62e-70	FB_1	AP000787.1
2.93e-74	0.265684	0.488	0.297	1.07e-69	FB_1	PRKN
3.27e-74	0.312902	0.175	0.078	1.2e-69	FB_1	LRIG1
3.43e-74	0.254993	0.246	0.124	1.25e-69	FB_1	GALNT2
8.32e-74	0.369881	0.109	0.039	3.05e-69	FB_1	CFI
1.89e-72	0.275846	0.425	0.251	6.9e-68	FB_1	ANTXR2
2.32e-72	0.306845	0.296	0.161	8.51e-68	FB_1	DLEU1
3.01e-72	0.380545	0.536	0.362	1.1e-67	FB_1	AC024230.1
7.68e-72	0.349917	0.159	0.07	2.81e-67	FB_1	PHACTR1
2.93e-71	0.385603	0.143	0.06	1.07e-66	FB_1	ADAM22
3.08e-71	0.400869	0.13	0.052	1.13e-66	FB_1	MALRD1
5.87e-71	0.363879	0.124	0.049	2.15e-66	FB_1	FSIP2
6.17e-71	0.372822	0.121	0.047	2.26e-66	FB_1	KCNMB4
7.74e-71	0.251207	0.199	0.095	2.83e-66	FB_1	RND3
1.15e-70	0.358712	0.195	0.094	4.2e-66	FB_1	AC007098.1
1.6e-70	0.295271	0.271	0.144	5.86e-66	FB_1	AC106845.1
3.4e-70	0.386487	0.128	0.052	1.24e-65	FB_1	THSD7A
4.51e-70	0.305086	0.181	0.084	1.65e-65	FB_1	ABHD15-AS1
6.34e-70	0.317401	0.151	0.065	2.32e-65	FB_1	GLCE
8.78e-70	0.289052	0.361	0.21	3.21e-65	FB_1	TENT5A
1.87e-69	0.391679	0.167	0.076	6.84e-65	FB_1	TMLHE-AS1
1.93e-69	0.322754	0.165	0.075	7.08e-65	FB_1	AL356599.1
2.09e-69	0.382666	0.217	0.109	7.67e-65	FB_1	KAZN-AS1
2.44e-69	0.266749	0.705	0.5	8.93e-65	FB_1	KCND2
2.58e-69	0.333961	0.156	0.069	9.44e-65	FB_1	HYMAI
3.95e-69	0.268469	0.177	0.082	1.45e-64	FB_1	FAM49A
7.27e-69	0.321426	0.102	0.037	2.66e-64	FB_1	ST3GAL6
8.98e-69	0.308084	0.319	0.18	3.29e-64	FB_1	ANKUB1
3.35e-68	0.31741	0.174	0.08	1.23e-63	FB_1	COL5A3
9.84e-68	0.314474	0.214	0.107	3.6e-63	FB_1	LYPLAL1
1.59e-67	0.261994	0.174	0.081	5.81e-63	FB_1	GNG2
2.66e-67	0.321947	0.15	0.066	9.73e-63	FB_1	MEIS1
2.82e-67	0.292253	0.205	0.101	1.03e-62	FB_1	AR
3.52e-67	0.314585	0.196	0.095	1.29e-62	FB_1	AP001011.1
7.55e-67	0.345977	0.116	0.046	2.76e-62	FB_1	MCTP2
8.78e-66	0.297209	0.192	0.094	3.22e-61	FB_1	MAST4
1.6e-65	0.320492	0.111	0.043	5.84e-61	FB_1	DLD
5.1e-65	0.454398	0.139	0.06	1.87e-60	FB_1	AL591501.1
1.3e-64	0.556866	0.192	0.098	4.76e-60	FB_1	AC011246.1
1.21e-63	0.533424	0.127	0.054	4.43e-59	FB_1	AL355612.1
2.28e-63	0.360394	0.172	0.083	8.33e-59	FB_1	AC023424.3
4.32e-63	0.283761	0.176	0.084	1.58e-58	FB_1	AMPH
6.44e-63	0.316	0.121	0.05	2.36e-58	FB_1	CELF2-AS2
7.34e-63	0.268426	0.219	0.113	2.69e-58	FB_1	AC023509.6
4.98e-61	0.263928	0.653	0.45	1.82e-56	FB_1	PAM
1.06e-60	0.326389	0.19	0.095	3.87e-56	FB_1	LRRC4C
1.28e-60	0.33164	0.129	0.056	4.68e-56	FB_1	APCDD1L-DT
1.59e-60	0.291192	0.203	0.104	5.83e-56	FB_1	TMEM132C
2.28e-60	0.3736	0.115	0.048	8.33e-56	FB_1	AC090579.1
2.38e-60	0.296685	0.128	0.055	8.73e-56	FB_1	B3GLCT
8.09e-60	0.302256	0.133	0.058	2.96e-55	FB_1	STAMBPL1
1.06e-59	0.376989	0.168	0.082	3.87e-55	FB_1	CLSTN2
1.42e-59	0.26707	0.114	0.047	5.18e-55	FB_1	FGF1
5.47e-59	0.268574	0.296	0.171	2e-54	FB_1	ATP8B1
6.26e-59	0.29305	0.159	0.075	2.29e-54	FB_1	MAPK10
6.7e-59	0.322745	0.109	0.044	2.45e-54	FB_1	IL34
1.04e-58	0.271434	0.144	0.066	3.81e-54	FB_1	AC007384.1
1.35e-58	0.275672	0.219	0.116	4.95e-54	FB_1	LINC00174
2.72e-58	0.263711	0.283	0.163	9.95e-54	FB_1	AP003086.1
5.23e-58	0.276781	0.519	0.346	1.92e-53	FB_1	ADAMTSL3
5.61e-58	0.285711	0.171	0.084	2.05e-53	FB_1	RFTN2
8.24e-58	0.334373	0.163	0.079	3.02e-53	FB_1	DLGAP1
1.57e-57	0.282525	0.188	0.096	5.76e-53	FB_1	AGMO
1.64e-57	0.292137	0.114	0.048	6.01e-53	FB_1	SAP30L-AS1
6.45e-57	0.257527	0.162	0.078	2.36e-52	FB_1	NBPF26
1.4e-55	0.279557	0.111	0.046	5.13e-51	FB_1	HELLPAR
2.12e-55	0.282769	0.111	0.047	7.77e-51	FB_1	GASK1B
2.16e-55	0.257703	0.202	0.106	7.91e-51	FB_1	INPP4A
7.66e-55	0.262909	0.155	0.075	2.81e-50	FB_1	GALNT7
2.1e-54	0.29075	0.128	0.057	7.69e-50	FB_1	GPC4
2.11e-54	0.34459	0.123	0.055	7.72e-50	FB_1	FSIP2-AS1
5.58e-54	0.262516	0.143	0.067	2.04e-49	FB_1	AP002812.2
8.42e-54	0.288761	0.112	0.048	3.08e-49	FB_1	SEMA6A
3.03e-53	0.298325	0.145	0.069	1.11e-48	FB_1	CCDC18
3.07e-53	0.266784	0.216	0.118	1.12e-48	FB_1	FAM227B
1.85e-52	0.252249	0.153	0.075	6.77e-48	FB_1	ITPR1
2.18e-51	0.257044	0.132	0.062	7.98e-47	FB_1	ZC4H2
5.66e-51	0.27992	0.147	0.072	2.07e-46	FB_1	DNAH14
8.27e-51	0.296505	0.102	0.043	3.03e-46	FB_1	C8orf34
6.18e-50	0.263322	0.149	0.073	2.26e-45	FB_1	STRADB
6.88e-50	0.27025	0.103	0.044	2.52e-45	FB_1	OSBPL3
1.15e-49	0.254767	0.16	0.081	4.2e-45	FB_1	AC020611.2
3.88e-49	0.319044	0.116	0.053	1.42e-44	FB_1	GRIA3
5.19e-49	0.308982	0.178	0.094	1.9e-44	FB_1	DIAPH2-AS1
2.75e-48	0.255722	0.1	0.043	1.01e-43	FB_1	ROR1-AS1
3.73e-48	0.267611	0.14	0.069	1.36e-43	FB_1	CMTM8
2.32e-46	0.280371	0.112	0.052	8.49e-42	FB_1	AL136441.1
4.02e-46	0.281338	0.117	0.055	1.47e-41	FB_1	AC007364.1
3.26e-45	0.270386	0.119	0.057	1.19e-40	FB_1	AC027018.1
8.67e-43	0.257183	0.108	0.05	3.17e-38	FB_1	ST8SIA1
1.94e-42	0.303686	0.1	0.046	7.1e-38	FB_1	AC131571.1
3.81e-42	0.254549	0.156	0.083	1.39e-37	FB_1	LMCD1-AS1
2.32e-41	0.28997	0.16	0.087	8.5e-37	FB_1	AC008014.1
2.53e-39	0.278384	0.103	0.049	9.25e-35	FB_1	EPSTI1
0	1.62955	0.105	0.006	0	FB_2	C7
0	1.59454	0.152	0.017	0	FB_2	ARHGAP15
0	2.09057	0.272	0.045	0	FB_2	PTCH2
0	1.83268	0.356	0.072	0	FB_2	SLIT3
0	1.54493	0.31	0.078	0	FB_2	CNTN4
0	1.64451	0.491	0.204	0	FB_2	FLRT2
0	1.68128	0.636	0.282	0	FB_2	NRP1
8.13e-297	1.18013	0.648	0.369	2.98e-292	FB_2	LDB2
1.17e-281	1.35646	0.208	0.046	4.27e-277	FB_2	GPC3
8.82e-226	1.27564	0.108	0.014	3.23e-221	FB_2	AC079793.1
2.18e-222	0.704181	0.875	0.674	7.98e-218	FB_2	ABCA10
2.44e-213	1.50076	0.258	0.089	8.93e-209	FB_2	CCDC102B
5.26e-210	1.18735	0.241	0.077	1.93e-205	FB_2	ABCC9
3.06e-208	1.15068	0.111	0.017	1.12e-203	FB_2	NTNG1
1.39e-192	1.20926	0.113	0.019	5.07e-188	FB_2	HHIP
1.46e-185	1.04245	0.319	0.133	5.34e-181	FB_2	FGF7
2.01e-179	1.07416	0.397	0.193	7.36e-175	FB_2	FBLN1
5.52e-178	1.03977	0.421	0.214	2.02e-173	FB_2	NR2F2-AS1
1.76e-152	0.926706	0.49	0.291	6.46e-148	FB_2	CFH
1.33e-148	0.957526	0.268	0.113	4.88e-144	FB_2	CDON
2.41e-146	1.02165	0.317	0.149	8.83e-142	FB_2	NAV2
4.83e-144	1.09434	0.303	0.142	1.77e-139	FB_2	PDE3A
2.04e-137	0.745288	0.647	0.453	7.45e-133	FB_2	ROBO2
1.22e-136	1.03798	0.152	0.046	4.46e-132	FB_2	SIPA1L1
3.82e-133	1.0867	0.132	0.037	1.4e-128	FB_2	PPFIA2
6.71e-132	0.526853	0.824	0.655	2.46e-127	FB_2	ABCA8
5.03e-130	1.03472	0.113	0.028	1.84e-125	FB_2	AC098588.3
1.42e-123	1.09777	0.22	0.092	5.19e-119	FB_2	KCNIP1
3.04e-123	0.866374	0.358	0.192	1.11e-118	FB_2	MAP3K5
8.25e-121	0.709974	0.502	0.314	3.02e-116	FB_2	COL14A1
9.67e-116	0.864293	0.244	0.109	3.54e-111	FB_2	PAK3
7.53e-113	0.787481	0.37	0.208	2.76e-108	FB_2	TMEM135
1.59e-109	0.773159	0.106	0.028	5.84e-105	FB_2	ZBTB7C
8.67e-106	0.884232	0.184	0.074	3.17e-101	FB_2	OLFML2B
1.08e-104	0.861488	0.124	0.039	3.94e-100	FB_2	VIPR2
2.38e-104	0.704556	0.467	0.296	8.7e-100	FB_2	GHR
4.18e-102	0.775139	0.311	0.164	1.53e-97	FB_2	ADAMTS9-AS2
1.17e-101	0.659398	0.539	0.37	4.28e-97	FB_2	SETBP1
4.73e-101	0.592318	0.675	0.528	1.73e-96	FB_2	NFIB
3.16e-100	0.818914	0.344	0.194	1.16e-95	FB_2	AC062004.1
1.02e-91	0.977052	0.232	0.114	3.72e-87	FB_2	MACROD2
5.58e-91	0.91552	0.491	0.349	2.04e-86	FB_2	RAD51B
5.85e-91	0.884649	0.252	0.13	2.14e-86	FB_2	ACVR2A
4.65e-90	0.80042	0.205	0.094	1.7e-85	FB_2	TIAM1
8.21e-90	0.938545	0.11	0.036	3e-85	FB_2	TSHR
1.41e-89	0.866195	0.285	0.155	5.16e-85	FB_2	ANGPT1
2.25e-84	0.930112	0.313	0.183	8.25e-80	FB_2	EPHA3
1.31e-83	0.877139	0.109	0.037	4.79e-79	FB_2	C1QTNF7
2.69e-81	0.837505	0.249	0.132	9.86e-77	FB_2	AC012409.2
3.51e-80	0.733112	0.331	0.198	1.28e-75	FB_2	ELN
9.71e-78	0.727686	0.161	0.07	3.56e-73	FB_2	MID1
7.45e-77	0.499748	0.547	0.398	2.73e-72	FB_2	CCDC80
2.03e-76	0.543379	0.533	0.382	7.42e-72	FB_2	ANK2
2.04e-76	0.664028	0.398	0.258	7.46e-72	FB_2	UST
2.32e-75	0.654027	0.253	0.136	8.51e-71	FB_2	DHRS3
1.11e-74	1.05532	0.164	0.075	4.07e-70	FB_2	AC098829.1
1.71e-72	0.748719	0.192	0.094	6.26e-68	FB_2	PTGFR
3.89e-70	0.47001	0.637	0.498	1.42e-65	FB_2	PARD3B
1.42e-68	0.654631	0.119	0.046	5.19e-64	FB_2	CACNA2D3
3.22e-68	0.627505	0.516	0.382	1.18e-63	FB_2	NAV3
5.71e-67	0.5879	0.425	0.291	2.09e-62	FB_2	ESR1
1.03e-66	0.48475	0.582	0.441	3.76e-62	FB_2	PRRX1
3.01e-66	0.625984	0.221	0.118	1.1e-61	FB_2	PELI2
1.23e-64	0.684504	0.221	0.12	4.5e-60	FB_2	FAM227B
3.6e-63	0.726287	0.22	0.121	1.32e-58	FB_2	EFEMP1
6.74e-63	0.647528	0.278	0.164	2.47e-58	FB_2	MGP
1.08e-62	0.656038	0.139	0.062	3.94e-58	FB_2	ROBO3
2.88e-60	0.669361	0.346	0.226	1.05e-55	FB_2	IGFBP7
1.94e-57	0.531283	0.556	0.43	7.11e-53	FB_2	ZNF385D
4.07e-57	0.674048	0.179	0.093	1.49e-52	FB_2	RCAN2
1.67e-53	0.643171	0.12	0.054	6.13e-49	FB_2	PCED1B
1.9e-53	0.610398	0.115	0.05	6.97e-49	FB_2	NTRK2
5.04e-52	0.444908	0.593	0.47	1.84e-47	FB_2	MBNL1
5.33e-50	0.511516	0.38	0.264	1.95e-45	FB_2	KCNT2
6.63e-50	0.478312	0.462	0.343	2.43e-45	FB_2	ZEB2
4.69e-48	0.332201	0.823	0.728	1.71e-43	FB_2	DLC1
5.59e-47	0.380387	0.517	0.39	2.05e-42	FB_2	PID1
2.6e-46	0.512118	0.252	0.158	9.51e-42	FB_2	PCNX2
8.46e-46	0.62532	0.134	0.067	3.1e-41	FB_2	RAI14
7.83e-45	0.464292	0.391	0.282	2.87e-40	FB_2	TPST1
2.97e-44	0.449233	0.39	0.279	1.09e-39	FB_2	ARHGAP26
6.53e-44	0.654345	0.113	0.054	2.39e-39	FB_2	CACNB2
8.64e-44	0.331468	0.647	0.529	3.16e-39	FB_2	ABCA6
3.09e-42	0.561378	0.164	0.091	1.13e-37	FB_2	PRR16
7.01e-42	0.514059	0.172	0.097	2.56e-37	FB_2	GARNL3
2.58e-40	0.473852	0.132	0.068	9.45e-36	FB_2	AFDN
2.68e-40	0.349024	0.756	0.671	9.8e-36	FB_2	MIR99AHG
1.01e-38	0.442275	0.384	0.283	3.69e-34	FB_2	ANTXR1
2.71e-38	0.438047	0.338	0.239	9.92e-34	FB_2	FMNL2
2.82e-37	0.452822	0.247	0.162	1.03e-32	FB_2	PPP1R12B
3.9e-37	0.369318	0.436	0.331	1.43e-32	FB_2	SVIL
8.49e-37	0.448171	0.115	0.059	3.11e-32	FB_2	SLC1A3
4.95e-36	0.37917	0.467	0.362	1.81e-31	FB_2	CALD1
1.16e-35	0.731723	0.353	0.268	4.25e-31	FB_2	ADAMTSL1
1.19e-35	0.503935	0.128	0.069	4.35e-31	FB_2	PLCL1
1.59e-35	0.558484	0.124	0.067	5.82e-31	FB_2	ANGPT2
3.04e-35	0.545857	0.157	0.091	1.11e-30	FB_2	CNTN1
3.67e-35	0.295002	0.691	0.587	1.34e-30	FB_2	BICC1
4.17e-35	0.428201	0.216	0.138	1.53e-30	FB_2	PHLDB2
2.44e-34	0.38005	0.306	0.214	8.92e-30	FB_2	CARMIL1
4.79e-34	0.495092	0.113	0.059	1.75e-29	FB_2	ADAMTS3
1.24e-33	0.377007	0.36	0.262	4.53e-29	FB_2	MEOX2
1.56e-33	0.474567	0.129	0.071	5.71e-29	FB_2	ZNF423
1.64e-33	0.465949	0.163	0.097	6.01e-29	FB_2	CASC15
2.9e-33	0.627399	0.119	0.064	1.06e-28	FB_2	TLL1
3.14e-32	0.446418	0.276	0.193	1.15e-27	FB_2	CACNB4
8.7e-32	0.278971	0.626	0.518	3.18e-27	FB_2	KCND2
1.66e-31	0.589698	0.168	0.103	6.09e-27	FB_2	LSAMP
2.16e-31	0.418544	0.18	0.112	7.91e-27	FB_2	CAB39L
3.24e-31	0.275084	0.59	0.49	1.18e-26	FB_2	FBXL7
5.5e-31	0.471585	0.164	0.101	2.01e-26	FB_2	RFTN1
1.19e-29	0.448195	0.217	0.145	4.37e-25	FB_2	NID2
1.3e-29	0.498095	0.149	0.089	4.78e-25	FB_2	LGR4
1.5e-29	0.409945	0.308	0.224	5.5e-25	FB_2	PRSS23
1.51e-29	0.328062	0.591	0.496	5.52e-25	FB_2	LHFPL6
1.59e-29	0.547023	0.107	0.058	5.83e-25	FB_2	COL24A1
3.1e-29	0.420203	0.469	0.38	1.13e-24	FB_2	SVEP1
1.33e-28	0.333843	0.436	0.344	4.86e-24	FB_2	CDK14
2.48e-28	0.290083	0.807	0.748	9.07e-24	FB_2	EBF1
3.44e-28	0.389985	0.299	0.217	1.26e-23	FB_2	GAB1
5.91e-28	0.385454	0.188	0.122	2.16e-23	FB_2	EMP1
9.86e-28	0.4863	0.159	0.1	3.61e-23	FB_2	AEBP2
3.76e-27	0.458508	0.152	0.094	1.38e-22	FB_2	PTPN13
1.07e-26	0.395687	0.241	0.168	3.93e-22	FB_2	MAGI3
1.12e-26	0.528636	0.107	0.06	4.09e-22	FB_2	CEP128
1.19e-26	0.422608	0.118	0.068	4.36e-22	FB_2	ENAH
2.86e-26	0.353746	0.359	0.278	1.05e-21	FB_2	MIR100HG
1.12e-25	0.469192	0.14	0.087	4.09e-21	FB_2	AC093879.1
1.44e-25	0.482062	0.13	0.079	5.26e-21	FB_2	CNTNAP4
4.58e-25	0.402672	0.124	0.074	1.68e-20	FB_2	RNF24
8e-25	0.271244	0.42	0.333	2.93e-20	FB_2	SYNE1
8.46e-25	0.388341	0.244	0.174	3.1e-20	FB_2	VPS13D
1.01e-24	0.295895	0.504	0.417	3.68e-20	FB_2	PARD3
5.57e-24	0.338099	0.213	0.147	2.04e-19	FB_2	ARHGEF3
6.64e-24	0.251435	0.499	0.405	2.43e-19	FB_2	JAK1
8.29e-24	0.402438	0.166	0.109	3.03e-19	FB_2	CRYBG3
9.21e-24	0.294942	0.246	0.174	3.37e-19	FB_2	IL16
9.82e-24	0.389419	0.223	0.157	3.59e-19	FB_2	CDH11
2.12e-23	0.266721	0.493	0.406	7.77e-19	FB_2	IMMP2L
2.93e-23	0.337298	0.259	0.188	1.07e-18	FB_2	TNRC6C
2.28e-22	0.367097	0.215	0.152	8.33e-18	FB_2	EFNA5
4.83e-22	0.294212	0.278	0.206	1.77e-17	FB_2	ZNF704
8.45e-22	0.378351	0.117	0.072	3.09e-17	FB_2	FANCC
9.28e-22	0.323696	0.339	0.264	3.4e-17	FB_2	ARHGAP6
6.32e-21	0.385502	0.156	0.104	2.31e-16	FB_2	RPS6KA5
6.99e-21	0.354247	0.105	0.062	2.56e-16	FB_2	CHRDL1
1.78e-20	0.404816	0.102	0.061	6.53e-16	FB_2	NIPAL2
3.27e-20	0.327528	0.141	0.091	1.2e-15	FB_2	MAML3
3.79e-20	0.326115	0.24	0.177	1.39e-15	FB_2	IL6ST
5.32e-20	0.324211	0.187	0.13	1.95e-15	FB_2	AP001528.1
5.78e-20	0.264881	0.434	0.356	2.12e-15	FB_2	SSBP2
1.01e-19	0.264597	0.369	0.292	3.71e-15	FB_2	BOC
1.08e-19	0.313893	0.211	0.152	3.96e-15	FB_2	RGL1
1.28e-19	0.359781	0.101	0.06	4.7e-15	FB_2	CCDC85A
4.17e-19	0.427842	0.113	0.071	1.53e-14	FB_2	SYNPO2
5.86e-19	0.356159	0.152	0.103	2.14e-14	FB_2	CACHD1
9.37e-19	0.365219	0.139	0.093	3.43e-14	FB_2	ORC4
1.38e-18	0.302507	0.26	0.198	5.07e-14	FB_2	PLSCR4
1.4e-18	0.296249	0.249	0.188	5.11e-14	FB_2	ZNF280D
2.07e-18	0.274575	0.208	0.15	7.57e-14	FB_2	NHSL2
2.21e-18	0.329198	0.156	0.106	8.1e-14	FB_2	ITPR2
2.37e-18	0.254937	0.393	0.321	8.69e-14	FB_2	DIAPH2
4.27e-18	0.320151	0.16	0.11	1.56e-13	FB_2	ITGA9
7.5e-18	0.336446	0.154	0.106	2.74e-13	FB_2	GLI2
1e-17	0.279106	0.326	0.259	3.68e-13	FB_2	ZFHX4
1.47e-17	0.300151	0.346	0.279	5.39e-13	FB_2	IGF1
2.17e-17	0.253712	0.374	0.302	7.93e-13	FB_2	ADK
2.71e-17	0.311973	0.286	0.222	9.93e-13	FB_2	EBF3
3.32e-17	0.334265	0.144	0.099	1.22e-12	FB_2	GSE1
3.41e-17	0.285401	0.196	0.141	1.25e-12	FB_2	AC068587.4
4.48e-17	0.270595	0.29	0.226	1.64e-12	FB_2	PER3
4.55e-17	0.301152	0.134	0.09	1.66e-12	FB_2	SESN3
3.1e-16	0.278611	0.135	0.092	1.13e-11	FB_2	LRP6
3.28e-16	0.304372	0.154	0.107	1.2e-11	FB_2	HIP1
3.78e-16	0.292028	0.225	0.17	1.38e-11	FB_2	PRICKLE2
6.42e-16	0.269375	0.232	0.178	2.35e-11	FB_2	ARHGAP32
1.97e-15	0.255665	0.161	0.114	7.2e-11	FB_2	ZMIZ1
2.03e-15	0.252632	0.177	0.128	7.41e-11	FB_2	BMERB1
2.19e-15	0.270257	0.14	0.097	8.02e-11	FB_2	AHCYL2
2.29e-15	0.290296	0.123	0.083	8.39e-11	FB_2	THBS2
1.46e-14	0.375802	0.198	0.15	5.33e-10	FB_2	COL21A1
1.71e-14	0.27047	0.161	0.117	6.24e-10	FB_2	DTWD1
1.73e-14	0.286595	0.112	0.075	6.35e-10	FB_2	SH3BP5
1.89e-14	0.260629	0.134	0.093	6.9e-10	FB_2	ACACB
1.98e-14	0.256754	0.381	0.321	7.26e-10	FB_2	HMCN1
3.49e-14	0.298973	0.109	0.073	1.28e-09	FB_2	PPL
3.84e-14	0.291872	0.104	0.069	1.4e-09	FB_2	PRELID2
4.34e-14	0.278507	0.461	0.399	1.59e-09	FB_2	EXT1
4.45e-14	0.297033	0.102	0.067	1.63e-09	FB_2	ITGA9-AS1
4.72e-14	0.307493	0.165	0.121	1.73e-09	FB_2	PLCE1
8.79e-14	0.281042	0.118	0.081	3.22e-09	FB_2	ADCY9
1.98e-13	0.250396	0.206	0.158	7.25e-09	FB_2	NREP
2.44e-13	0.280027	0.165	0.121	8.93e-09	FB_2	SLCO3A1
3.35e-13	0.313403	0.209	0.161	1.23e-08	FB_2	PCSK5
1.06e-12	0.250837	0.22	0.172	3.87e-08	FB_2	SPECC1L
1.26e-12	0.296382	0.119	0.084	4.6e-08	FB_2	SRPX
1.66e-12	0.329143	0.21	0.165	6.09e-08	FB_2	STARD4-AS1
1.68e-12	0.294344	0.139	0.101	6.16e-08	FB_2	SH3RF3
1.86e-12	0.26322	0.182	0.138	6.81e-08	FB_2	AC005550.2
1.9e-12	0.302308	0.143	0.105	6.95e-08	FB_2	EIF2B3
2.31e-12	0.266957	0.184	0.141	8.44e-08	FB_2	NFIX
3.15e-12	0.348685	0.14	0.102	1.15e-07	FB_2	DOK6
3.55e-12	0.312887	0.111	0.077	1.3e-07	FB_2	FBXL13
7.74e-12	0.308119	0.127	0.091	2.83e-07	FB_2	EML1
1.21e-11	0.264821	0.139	0.102	4.42e-07	FB_2	MGMT
1.71e-11	0.267008	0.18	0.139	6.27e-07	FB_2	TRMT11
3.29e-11	0.264307	0.202	0.158	1.2e-06	FB_2	AC106845.1
1.78e-10	0.272001	0.117	0.085	6.53e-06	FB_2	TBX18
2.71e-10	0.263045	0.131	0.097	9.93e-06	FB_2	CPXM2
2.83e-10	0.257391	0.165	0.127	1.04e-05	FB_2	LINC00174
3.28e-10	0.251406	0.136	0.102	1.2e-05	FB_2	FAM168A
4.76e-10	0.257012	0.157	0.121	1.74e-05	FB_2	AP001347.1
1.25e-09	0.275553	0.607	0.578	4.57e-05	FB_2	KAZN
9.04e-08	0.360734	0.17	0.14	0.00330848	FB_2	AL357873.1
0	1.88577	0.399	0.09	0	FB_3	MT-ND5
0	2.104	0.529	0.149	0	FB_3	MTRNR2L12
0	1.8743	0.548	0.155	0	FB_3	MT-ND2
0	1.73559	0.576	0.179	0	FB_3	MT-ND1
0	1.95271	0.657	0.194	0	FB_3	MT-ND4
0	1.95491	0.682	0.207	0	FB_3	MT-CYB
0	1.98155	0.742	0.256	0	FB_3	MT-CO2
0	2.11379	0.805	0.269	0	FB_3	MT-ATP6
0	1.95701	0.788	0.306	0	FB_3	MT-ND3
0	1.99949	0.802	0.312	0	FB_3	MT-CO1
0	2.03031	0.873	0.35	0	FB_3	MT-CO3
0	1.40294	0.782	0.527	0	FB_3	COL1A1
7.53e-270	1.15532	0.809	0.604	2.76e-265	FB_3	COL3A1
6.77e-265	1.67389	0.163	0.027	2.48e-260	FB_3	MTRNR2L8
3.38e-254	1.507	0.214	0.049	1.24e-249	FB_3	MT-ND4L
9.66e-182	1.0386	0.653	0.456	3.53e-177	FB_3	COL6A2
7.34e-172	0.921177	0.701	0.524	2.69e-167	FB_3	COL6A1
1.6e-168	1.24423	0.149	0.035	5.84e-164	FB_3	MT-ATP8
1.64e-144	0.752591	0.731	0.542	6e-140	FB_3	COL15A1
1.81e-141	0.918628	0.499	0.293	6.63e-137	FB_3	CFD
5.7e-140	0.731499	0.838	0.734	2.09e-135	FB_3	COL1A2
6.71e-134	0.823973	0.655	0.484	2.45e-129	FB_3	GSN
6.73e-124	0.895092	0.574	0.407	2.46e-119	FB_3	HSPG2
8.52e-116	0.676983	0.741	0.603	3.12e-111	FB_3	COL6A3
3.13e-109	1.0012	0.287	0.137	1.15e-104	FB_3	PTGDS
1.78e-96	0.908475	0.103	0.028	6.52e-92	FB_3	MT-ND6
1.96e-80	0.472524	0.803	0.716	7.16e-76	FB_3	DCN
3.56e-80	0.943672	0.278	0.151	1.3e-75	FB_3	C1R
6.21e-79	0.78713	0.417	0.267	2.27e-74	FB_3	C3
9.47e-79	0.971573	0.235	0.118	3.47e-74	FB_3	MMP2
3.4e-69	0.875747	0.229	0.119	1.24e-64	FB_3	SERPING1
2.18e-68	0.853818	0.124	0.047	7.97e-64	FB_3	ISLR
2.42e-66	0.813288	0.326	0.203	8.85e-62	FB_3	SPARCL1
5.29e-65	0.840829	0.285	0.166	1.94e-60	FB_3	MGP
3.51e-62	0.679537	0.481	0.364	1.29e-57	FB_3	MRC2
1.04e-60	0.662685	0.49	0.377	3.8e-56	FB_3	LRP1
7.67e-58	0.555082	0.569	0.445	2.81e-53	FB_3	SMOC2
1.61e-56	0.876029	0.301	0.193	5.88e-52	FB_3	SPARC
1.29e-53	0.756687	0.159	0.077	4.71e-49	FB_3	PSAP
3.04e-53	0.777282	0.173	0.087	1.11e-48	FB_3	CST3
7.23e-52	0.795362	0.192	0.103	2.65e-47	FB_3	CXCL14
2.11e-50	0.342824	0.268	0.159	7.72e-46	FB_3	APOD
2.12e-48	0.833022	0.151	0.076	7.76e-44	FB_3	LUM
5.94e-48	0.789669	0.112	0.048	2.17e-43	FB_3	TIMP1
2.12e-47	0.616272	0.263	0.164	7.77e-43	FB_3	THBS4
1.26e-46	0.757579	0.206	0.118	4.61e-42	FB_3	SERPINF1
1.65e-46	0.737696	0.113	0.05	6.03e-42	FB_3	HTRA1
2.3e-45	0.662535	0.325	0.222	8.41e-41	FB_3	ACTA1
2.43e-45	0.349377	0.533	0.397	8.9e-41	FB_3	LRRTM4
1.72e-43	0.79304	0.156	0.082	6.3e-39	FB_3	HTRA3
1.2e-40	0.781133	0.133	0.068	4.41e-36	FB_3	MXRA5
1.53e-40	0.275037	0.91	0.88	5.61e-36	FB_3	RORA
1.57e-40	0.728267	0.228	0.143	5.75e-36	FB_3	CXCL12
7.43e-40	0.59786	0.345	0.241	2.72e-35	FB_3	LRP1B
3.11e-39	0.639204	0.288	0.196	1.14e-34	FB_3	FBLN2
5.97e-39	0.657678	0.221	0.136	2.19e-34	FB_3	ITGA8
4.62e-35	0.600849	0.308	0.218	1.69e-30	FB_3	ANGPTL1
3.11e-34	0.572421	0.331	0.242	1.14e-29	FB_3	ITIH5
2.14e-33	0.523551	0.362	0.269	7.85e-29	FB_3	IL1RAPL1
1.16e-31	0.66935	0.149	0.086	4.25e-27	FB_3	CD63
1.37e-31	0.675657	0.192	0.121	5.01e-27	FB_3	CILP
8.17e-27	0.57095	0.108	0.058	2.99e-22	FB_3	CD81
1.63e-26	0.690036	0.11	0.061	5.97e-22	FB_3	OGN
1.74e-25	0.348091	0.641	0.59	6.38e-21	FB_3	TCF4
2.59e-25	0.342591	0.415	0.327	9.47e-21	FB_3	SCN7A
7.36e-24	0.580484	0.104	0.058	2.7e-19	FB_3	ADAMTSL2
1.36e-21	0.493964	0.238	0.174	4.99e-17	FB_3	PLCB4
1.4e-21	0.39287	0.477	0.413	5.11e-17	FB_3	CCDC80
2.81e-21	0.568201	0.13	0.081	1.03e-16	FB_3	FADS2
2.8e-20	0.573918	0.111	0.067	1.03e-15	FB_3	B2M
3.07e-20	0.4527	0.278	0.213	1.12e-15	FB_3	COL4A1
9.61e-20	0.502029	0.251	0.189	3.52e-15	FB_3	COLGALT2
5.6e-19	0.552043	0.166	0.114	2.05e-14	FB_3	PCOLCE
[truncated: 2,479 more rows]

## Sheet: f. Myeloid
Seurat FindAllMarkers signficant marker genes distinguishing Myelooid subpopulations
[truncated: 10,849 more rows]
[truncated: 14 more columns]

[truncated: 5 more sheets: g. Lymphoid, h. Lymphoid Antibody definititi, i. Brenner RA reference, j. Smooth muscle and Pericytes, k. Endothelial]
