# Supplementary material for: Single nuclei/cell transcriptomics reveal DMD driven cell dynamics and mechanisms of fibroblast inflammatory tissue priming in human dystrophic muscle
Source: Research Square preprint supplement (doi:10.21203/rs.3.rs-4934147/v1), 2026-04-08
Supplement: Supplementary file 3 [file 57c5cd9fed1bf393f1dc9bf9.pdf]

Severe

|      |            |  |  |  |                                              |
|------|------------|--|--|--|----------------------------------------------|
| 1624 | p_Q2831X   |  |  |  | Detected rescued DMD mRNA : 0                |
| 1576 | del_E46-47 |  |  |  | Detected rescued DMD mRNA : 0                |
| 1679 | p_R3381X   |  |  |  | Detected rescued DMD mRNA : 0                |
| 1699 | p.Q532X    |  |  |  | Detected rescued DMD mRNA : 1.5% Ex. 13 skip |
| 1694 | p_R3034X   |  |  |  | Detected rescued DMD mRNA : 0                |
| 1683 | p_E2788X   |  |  |  | Detected rescued DMD mRNA : 0                |

Typical

|      |          |  |  |  |                               |
|------|----------|--|--|--|-------------------------------|
| 1675 | p_R3381X |  |  |  | Detected rescued DMD mRNA : 0 |
| 1676 | p_L2690X |  |  |  | Detected rescued DMD mRNA : 0 |
| 1682 | p_R1666X |  |  |  | Detected rescued DMD mRNA : 0 |
| 1695 | p_E753X  |  |  |  | Detected rescued DMD mRNA : 0 |
| 1684 | pW1694X  |  |  |  | Detected rescued DMD mRNA : 0 |
| 1612 | p.R3391X |  |  |  | Detected rescued DMD mRNA : 0 |
| 1230 | p.R3391X |  |  |  | Detected rescued DMD mRNA : 0 |

Typical

|                    |  |  |  |                               |
|--------------------|--|--|--|-------------------------------|
| 1687<br>p_R539X    |  |  |  | Detected rescued DMD mRNA : 0 |
| 1600<br>Del_E46-52 |  |  |  | Detected rescued DMD mRNA : 0 |
| 1690<br>p_R2098X   |  |  |  | Detected rescued DMD mRNA : 0 |
| 1696<br>p_Q2907X   |  |  |  | Detected rescued DMD mRNA : 0 |
| 1272<br>c.1259dup  |  |  |  | Detected rescued DMD mRNA : U |

Mild

|                     |  |  |  |                                           |
|---------------------|--|--|--|-------------------------------------------|
| 8200<br>Del_E45     |  |  |  | Detected rescued DMD mRNA : 2% E.44 skip  |
| 1668<br>p.E18:18X   |  |  |  | Detected rescued DMD mRNA : 5% Ex.38 skip |
| 1692<br>p_R145X     |  |  |  | Detected rescued DMD mRNA : 0             |
| 8009<br>c.4100del_A |  |  |  | Detected rescued DMD mRNA : 2% E.30 skip  |
| 8020<br>Dup_E2      |  |  |  | Detected rescued DMD mRNA : 7.5% E.2 skip |
| 1622<br>p.E3468X    |  |  |  | Detected rescued DMD mRNA : 20% E.30 skip |
| 1685<br>p_R430X     |  |  |  | Detected rescued DMD mRNA : 0             |
| 1023<br>Del_3-23    |  |  |  | Detected rescued DMD mRNA : 0             |

Mild

8011  
Del\_E3-7

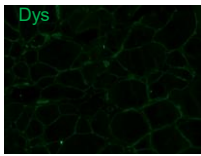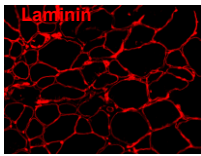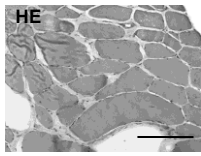

Detected rescued DMD mRNA : 0

Healthy

8100  
Healthy

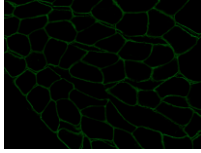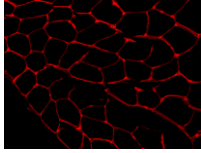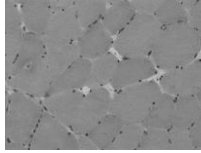

Detected rescued DMD mRNA : ND

8102  
Healthy

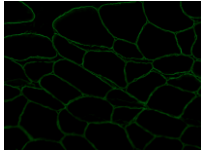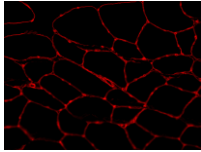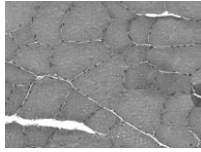

Detected rescued DMD mRNA : ND

8108  
Healthy

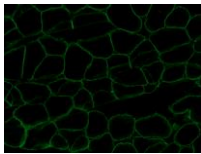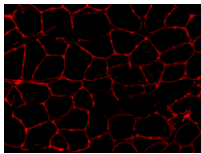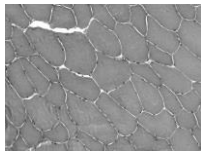

Detected rescued DMD mRNA : ND

8109  
Healthy

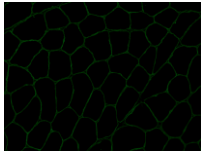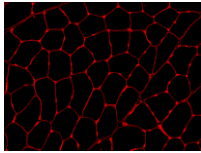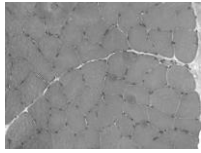

Detected rescued DMD mRNA : ND
