# Supplementary material for: Single nuclei/cell transcriptomics reveal DMD driven cell dynamics and mechanisms of fibroblast inflammatory tissue priming in human dystrophic muscle
Source: Research Square preprint supplement (doi:10.21203/rs.3.rs-4934147/v1), 2026-04-08

**a** Definitional markers of lymphoid snRNAseq and scRNAseq populations

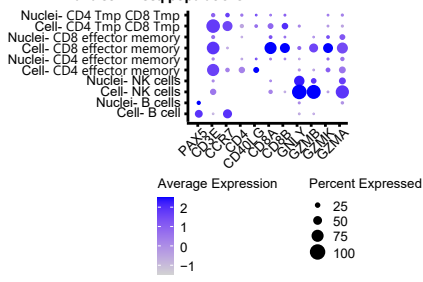

**b** CITEseq antibody defined subsets

|                   |                            |
|-------------------|----------------------------|
| ACT NK            | CD56-CD335-CD16+           |
| Mature NK         | CD56hiCD3-CD16+            |
| NK                | CD56+CD335+CD16-CD3-       |
| INKT TCR          | Va24/18+                   |
| Treg              | FoxP3+CCR4+IL7R-           |
| $\gamma/\delta$   | CD56-                      |
| Maits             | Trav1-2+ CD161+            |
| KIR3DL2           | KIR3DL2+CD8+CD3+CD56-      |
| KIR2DL3           | KIR2DL3+CD8+CD3+CD56-      |
| KIR3DL1           | KIR3DL1+CD8+CD3+CD56-      |
| Indeterminant CD8 | CD8+                       |
| CD8+              | CD8+CD45RO+CCR7+           |
| CD8 Tcm           | CD8+CD45RO+CCR7-           |
| CD8 Te            | CD8+CD45RO-CCR7-           |
| CD8 Tmp           | CD8+CD45RO-CCR7+           |
| CD4 Tcm           | CD4+45RO+CCR7+             |
| CD4 Tem           | CD4+CD45RO+CCR7-           |
| CD4 Te            | CD4+CD45RO-CCR7-           |
| CD4 Tmp           | CD4+RO-CCR7+               |
| NS memory B cells | CD19+CD27+IGD+             |
| Breg              | TIGIT+CD19+IGHM+           |
| TR B cells        | CD19+CD27-IGD+CD38hiCD24hi |
| DN B cells        | CD19+CD27-IGD-             |
| Naive B cells     | CD19+CD27-IGD+CD38dimCD2   |

**c** Comparison of Antibody defined subsets vs RA reference mapping

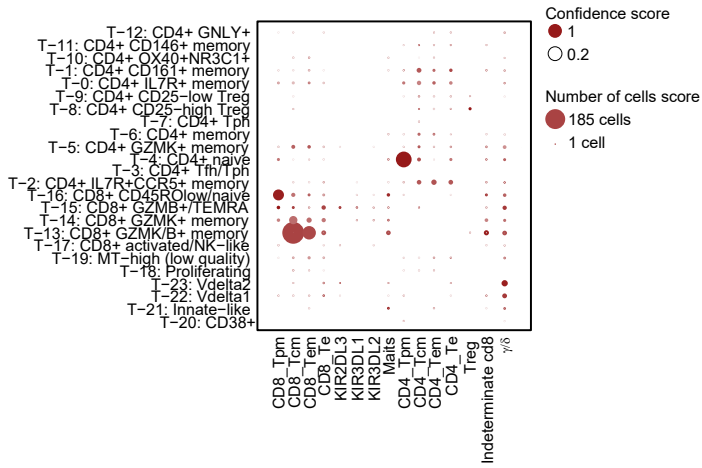

Supplement: Supplementary file 5 [file 8231d708b7cb626039198ea3.pdf]
