# Supplementary figures and images for: Single nuclei/cell transcriptomics reveal DMD driven cell dynamics and mechanisms of fibroblast inflammatory tissue priming in human dystrophic muscle
Source: Research Square preprint supplement (doi:10.21203/rs.3.rs-4934147/v1), 2026-04-08

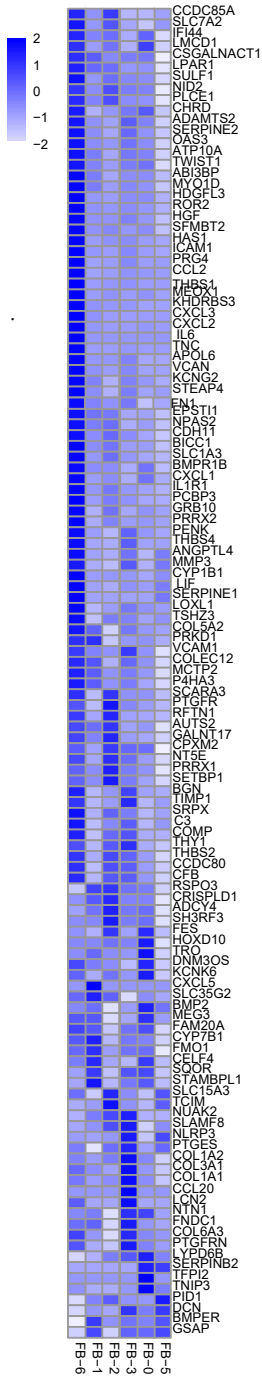

Supplement: Supplementary file 1 [file 066a3bd1f85f7b9d37b38cbd.pdf]

a

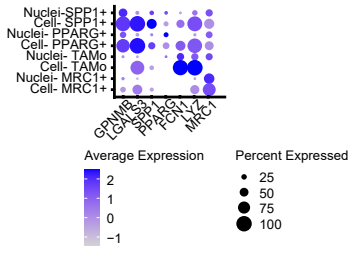

Supplement: Supplementary file 2 [file 2d1155198de19866d5a711a0.pdf]

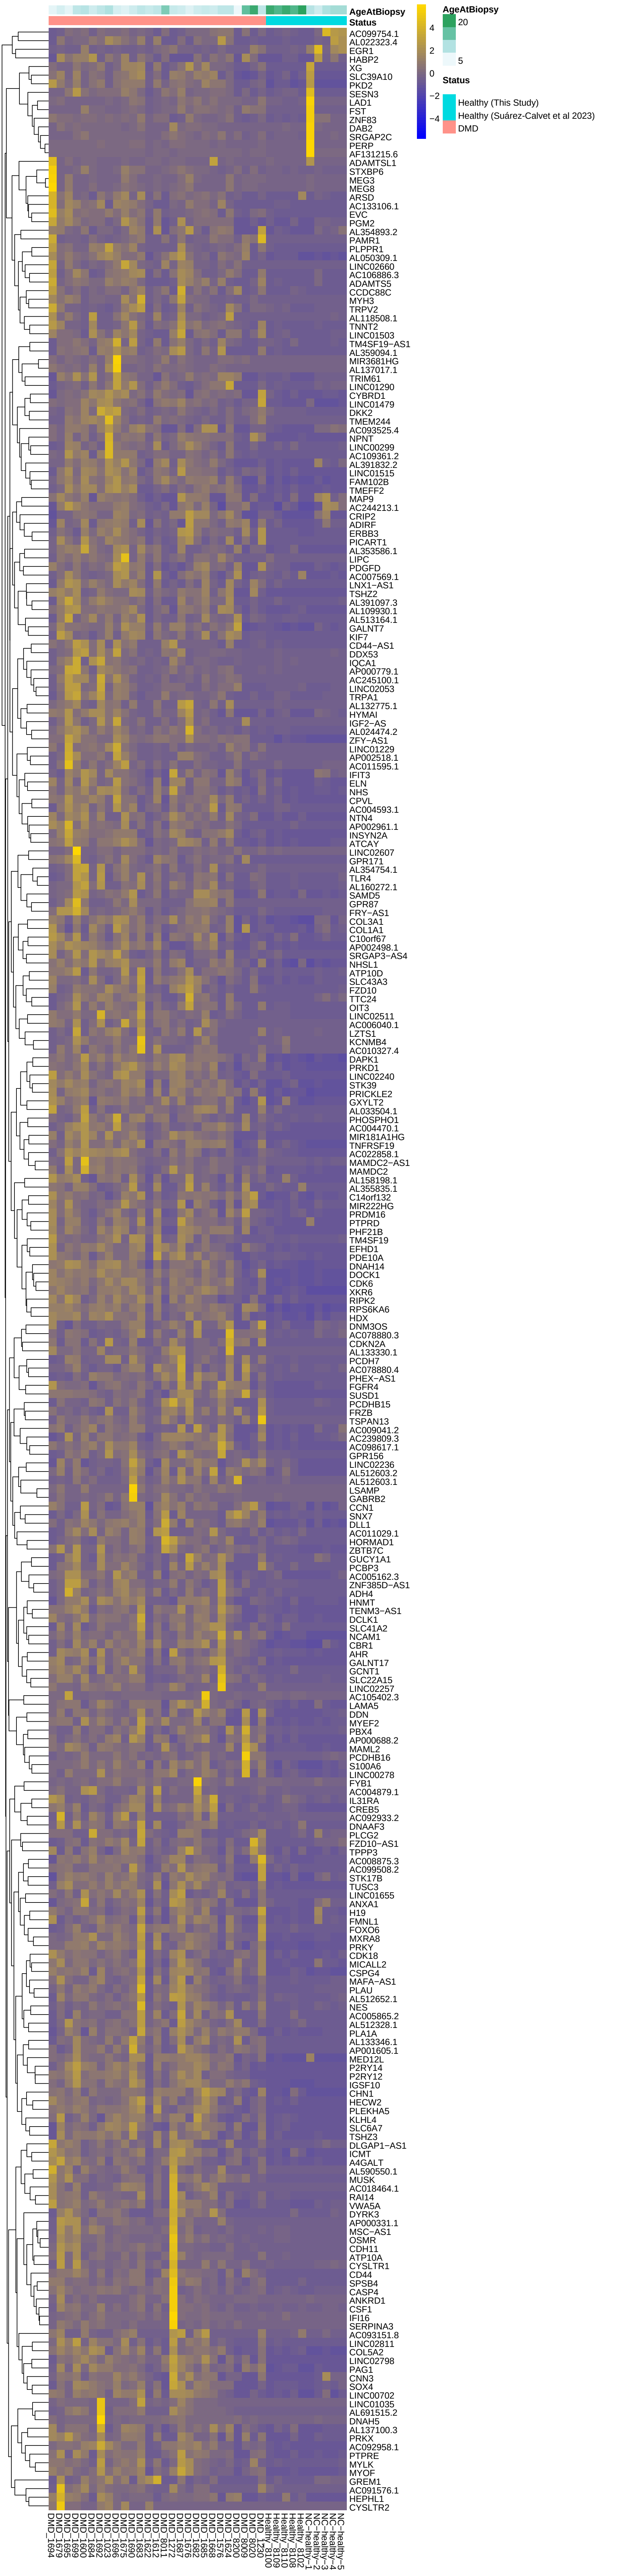

Supplement: Supplementary file 4 [file 6b86a8eb0b7d16d179ace765.pdf]

a

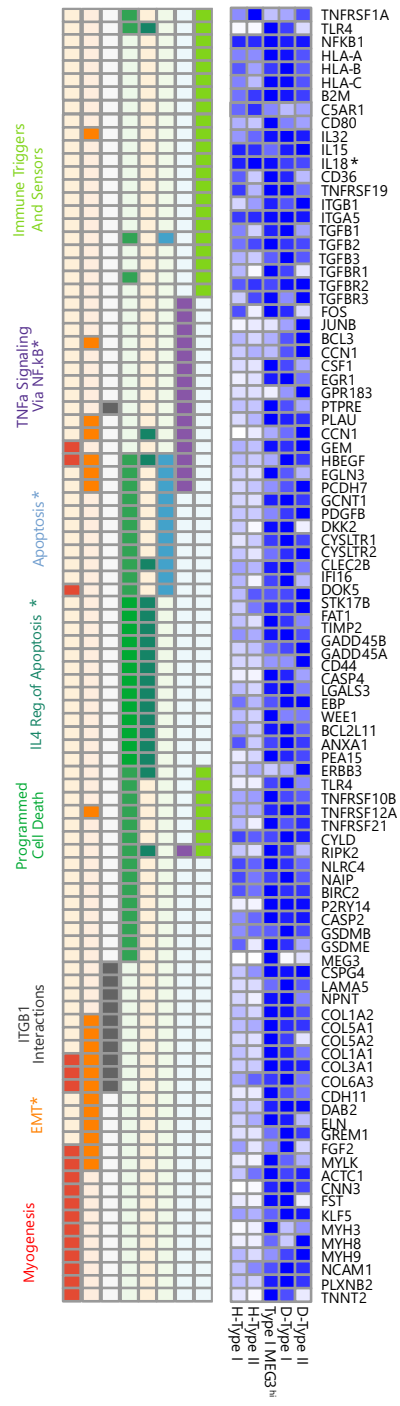

b

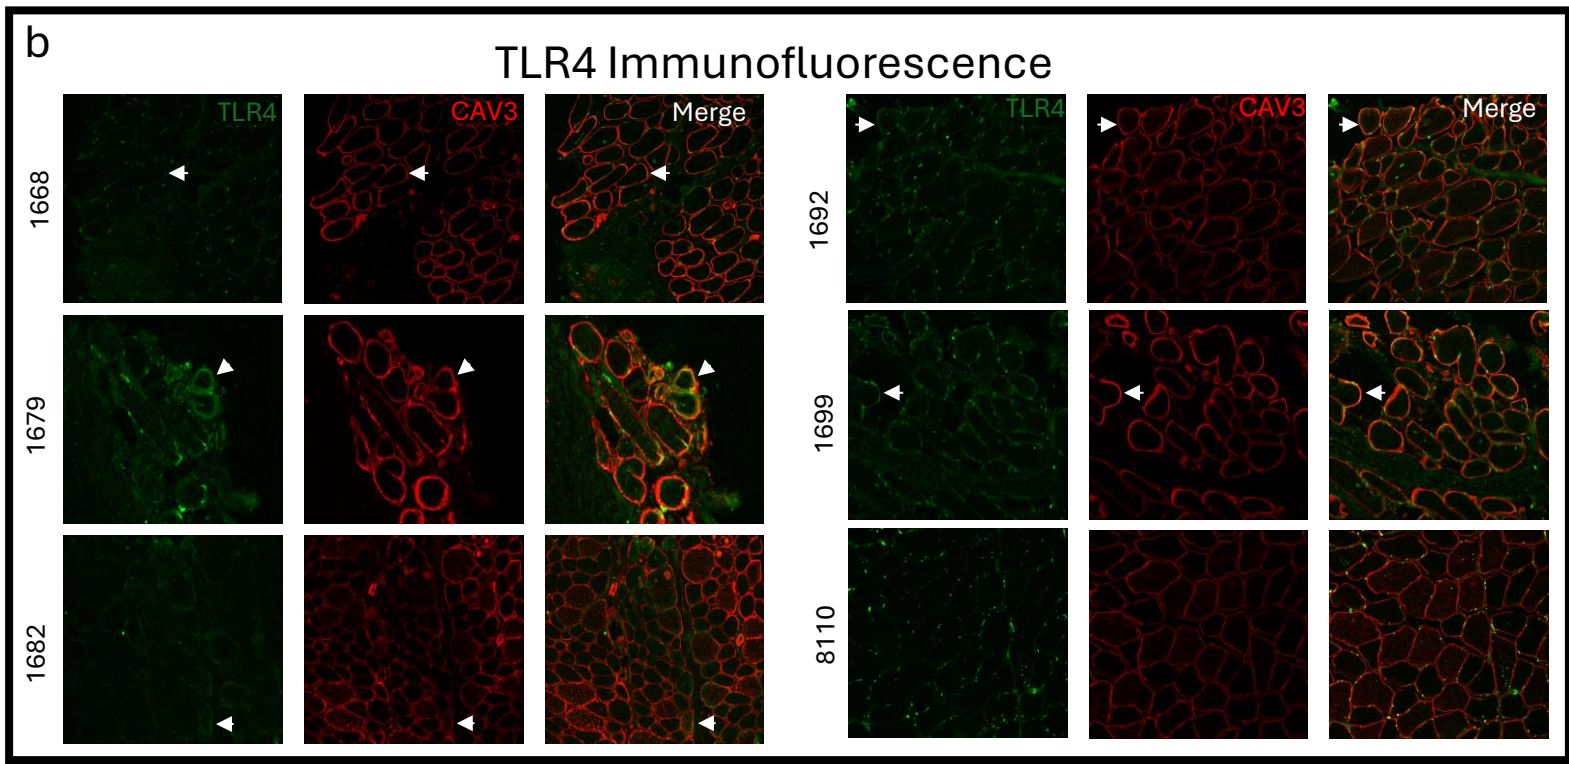

c

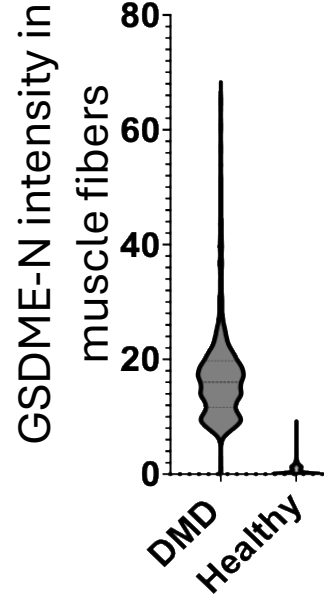

d

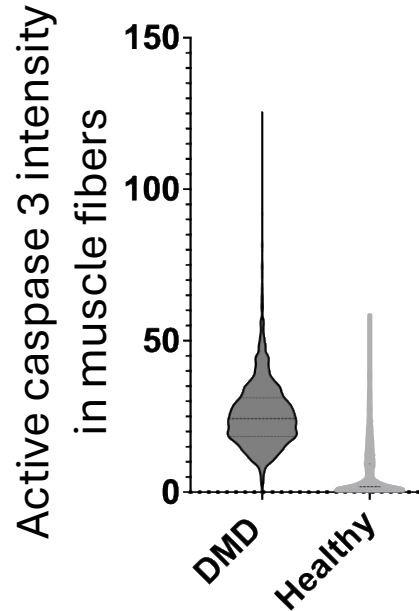

Supplement: Supplementary file 6 [file 9b48590374e57609263aa00d.pdf]
